# Supplementary material for: Targeting DNA topoisomerases or checkpoint kinases results in an overload of chaperone systems, triggering aggregation of a metastable subproteome
Source: eLife. 2022 Feb 24;11:e70726. doi: 10.7554/eLife.70726 (PMC8871389; doi:10.7554/eLife.70726)
Supplement: Supplementary file 1. [file elife-70726-supp1.xlsx]

## Sheet: Information
Supplemental Table 1. MS datasets
ABOUT THIS DOCUMENT
This document lists all protein IDs that were identified in our MS analysis, subdivided into proteins that were identified in the insoluble (aggregated fractions), and proteins identified in the WCL.
These data are from 4 independent biological repeats.
P-values were adjusted for multiple comparisons using the Benjamini-Hochberg method (see Materials and Methods)
In addition, sheet 2 ('Overview MSMS data') provides an explanation on the subsets of (non)aggregating proteins as defined in the manuscript.

## Sheet: Overview MSMS data
HEK293T
CPT v. DMSO						Not identified as aggregating in either
	INSOLUBLE PROTEINS							WHOLE CELL LYSATE
Up	122							3375
Down	29
Unchanged*	214
		Identified as unchanged in both
				HEK293T Baseline		HEK293T NIA		HEK293T WCL
				179		1935		3889
ATM inhibitor v. DMSO
	INSOLUBLE PROTEINS							WHOLE CELL LYSATE
Up	39							3332
Down	5	Identified as unchanged in both				Not identified as aggregating in either
Unchanged*	373
* identified in > 1 repeats of both case and control, and p.adjust > 0.05
U2OS
CPT v. DMSO						Not identified as aggregating in either
	INSOLUBLE PROTEINS							WHOLE CELL LYSATE
Up	106							3395
Down	61
Unchanged*	664
		Identified as unchanged in both
				U2OS Baseline		U2OS NIA		U2OS WCL
				516		1679		3699
ATM KO v. wild-type
	INSOLUBLE PROTEINS							WHOLE CELL LYSATE
Up	210							3147
Down	53	Identified as unchanged in both				Not identified as aggregating in either
Unchanged*	806
* identified in > 1 repeats of both case and control, and p.adjust > 0.05

## Sheet: HEK293T - ATM inh v. DMSO - INS
Protein.ID	Gene.name	Peptide.counts..unique.	Fasta.headers	avg.Case.log.intensity	avg.Control.log.intensity	avg.Case.num.reps	avg.Control.num.reps	log2foldChange	log2foldChange.adjusted	p.value	p.adjust.value	Significant	Significant.adjusted	Identified in ctrl RNAseq?	log10(CPMs ctrl)	TANGO
A8K2U0	A2ML1	11	sp|A8K2U0|A2ML1_HUMAN Alpha-2-macroglobulin-like protein 1 OS=Homo sapiens OX=9606 GN=A2ML1 PE=1 SV=3	22.507	22.7946	4	4	-0.287603	-0.287216	0.363754	0.530908	No	No	No		3.93323
E9PAV3	NACA	7	sp|E9PAV3|NACAM_HUMAN Nascent polypeptide-associated complex subunit alpha, muscle-specific form OS=Homo sapiens OX=9606 GN=NACA PE=1 SV=1;sp|Q13765|NACA_HUMAN Nascent polypeptide-associated complex subunit alpha OS=Homo sapiens OX=9606 GN=NACA PE=1 SV=1	21.4771	20.9498	1	3	0.527235	0.526526	0.46439	0.61321	No	No	No		3.24945
E9PRG8	C11orf98	3	sp|E9PRG8|CK098_HUMAN Uncharacterized protein C11orf98 OS=Homo sapiens OX=9606 GN=C11orf98 PE=4 SV=2	18.2428	19.5879	0	1	-1.34507	-1.34326	1.18662e-05	7.44633e-05	No	No	No		2.60709
O00139	KIF2A	19	sp|O00139|KIF2A_HUMAN Kinesin-like protein KIF2A OS=Homo sapiens OX=9606 GN=KIF2A PE=1 SV=3	23.2354	22.5499	4	4	0.685566	0.684644	0.232099	0.393087	No	No	Yes	1.93401	3.19399
O00159	MYO1C	52	sp|O00159|MYO1C_HUMAN Unconventional myosin-Ic OS=Homo sapiens OX=9606 GN=MYO1C PE=1 SV=4	21.2684	18.6652	3	0	2.6032	2.5997	0.0346124	0.094086	No	No	Yes	1.47054	3.62468
O00391	QSOX1	3	sp|O00391|QSOX1_HUMAN Sulfhydryl oxidase 1 OS=Homo sapiens OX=9606 GN=QSOX1 PE=1 SV=3	18.1929	19.9492	0	1	-1.75627	-1.75391	4.56626e-06	3.59002e-05	No	No	Yes	1.3809	3.72208
O00410	IPO5	40	sp|O00410|IPO5_HUMAN Importin-5 OS=Homo sapiens OX=9606 GN=IPO5 PE=1 SV=4	23.0167	22.1099	1	1	0.90675	0.90553	0.00433338	0.0143885	No	No	Yes	2.32344	3.73551
O00422	SAP18	10	sp|O00422|SAP18_HUMAN Histone deacetylase complex subunit SAP18 OS=Homo sapiens OX=9606 GN=SAP18 PE=1 SV=1	21.8134	18.6953	1	0	3.11811	3.11392	1.02792e-06	1.26262e-05	No	No	Yes	1.85794	2.8396
O00567	NOP56	37	sp|O00567|NOP56_HUMAN Nucleolar protein 56 OS=Homo sapiens OX=9606 GN=NOP56 PE=1 SV=4	22.3253	21.0591	2	1	1.26616	1.26445	0.00042335	0.00155684	Yes	Yes	Yes	2.26887	3.12469
O00571	DDX3X	44	sp|O00571|DDX3X_HUMAN ATP-dependent RNA helicase DDX3X OS=Homo sapiens OX=9606 GN=DDX3X PE=1 SV=3;sp|O15523|DDX3Y_HUMAN ATP-dependent RNA helicase DDX3Y OS=Homo sapiens OX=9606 GN=DDX3Y PE=1 SV=2	26.4039	25.9411	4	4	0.462831	0.462209	0.0815216	0.192279	No	No	Yes	2.17333	3.30033
O14529	CUX2	1	sp|O14529|CUX2_HUMAN Homeobox protein cut-like 2 OS=Homo sapiens OX=9606 GN=CUX2 PE=1 SV=4	18.2846	21.7351	0	1	-3.45047	-3.44583	6.82876e-06	4.81533e-05	No	No	Yes	0.719521
O14578	CIT	82	sp|O14578|CTRO_HUMAN Citron Rho-interacting kinase OS=Homo sapiens OX=9606 GN=CIT PE=1 SV=2	23.4855	23.3833	4	4	0.102211	0.102074	0.891955	0.937169	No	No	Yes	1.45349	3.63315
O14654	IRS4	33	sp|O14654|IRS4_HUMAN Insulin receptor substrate 4 OS=Homo sapiens OX=9606 GN=IRS4 PE=1 SV=1	23.3192	22.8851	4	4	0.434135	0.433551	0.140828	0.284989	No	No	Yes	1.72508	3.57612
O14818	PSMA7	10	sp|O14818|PSA7_HUMAN Proteasome subunit alpha type-7 OS=Homo sapiens OX=9606 GN=PSMA7 PE=1 SV=1;sp|Q8TAA3|PSMA8_HUMAN Proteasome subunit alpha-type 8 OS=Homo sapiens OX=9606 GN=PSMA8 PE=2 SV=3	20.8786	21.5288	3	1	-0.650225	-0.649351	0.375372	0.538269	No	No	Yes	2.36598	3.3569
O15020	SPTBN2	3	sp|O15020|SPTN2_HUMAN Spectrin beta chain, non-erythrocytic 2 OS=Homo sapiens OX=9606 GN=SPTBN2 PE=1 SV=3	18.2549	22.9894	0	1	-4.73443	-4.72807	7.13289e-11	8.13149e-09	No	No	Yes	0.94219	3.63386
O15042	U2SURP	30	sp|O15042|SR140_HUMAN U2 snRNP-associated SURP motif-containing protein OS=Homo sapiens OX=9606 GN=U2SURP PE=1 SV=2	24.1873	21.9238	4	3	2.26345	2.26041	0.131575	0.270262	No	No	Yes	2.59623	3.18502
O15078	CEP290	39	sp|O15078|CE290_HUMAN Centrosomal protein of 290 kDa OS=Homo sapiens OX=9606 GN=CEP290 PE=1 SV=2	22.2113	23.4205	3	4	-1.20919	-1.20756	0.426161	0.579511	No	No	Yes	2.37336	2.99136
O15371	EIF3D	18	sp|O15371|EIF3D_HUMAN Eukaryotic translation initiation factor 3 subunit D OS=Homo sapiens OX=9606 GN=EIF3D PE=1 SV=1	19.7108	18.5951	1	0	1.11577	1.11427	2.92115e-05	0.000152238	No	No	Yes	2.3932	2.66977
O43143	DHX15	35	sp|O43143|DHX15_HUMAN Pre-mRNA-splicing factor ATP-dependent RNA helicase DHX15 OS=Homo sapiens OX=9606 GN=DHX15 PE=1 SV=2	23.9022	23.9766	4	4	-0.0744081	-0.0743081	0.497671	0.636274	No	No	Yes	1.65526	3.61435
O43175	PHGDH	27	sp|O43175|SERA_HUMAN D-3-phosphoglycerate dehydrogenase OS=Homo sapiens OX=9606 GN=PHGDH PE=1 SV=4	25.7329	25.2405	4	4	0.492334	0.491672	0.1541	0.302197	No	No	Yes	2.30519	3.07683
O43303	CCP110	9	sp|O43303|CP110_HUMAN Centriolar coiled-coil protein of 110 kDa OS=Homo sapiens OX=9606 GN=CCP110 PE=1 SV=3	21.0045	18.6686	1	0	2.33587	2.33273	0.000110625	0.000458592	No	No	Yes	1.81592	2.84097
O43548	TGM5	3	sp|O43548|TGM5_HUMAN Protein-glutamine gamma-glutamyltransferase 5 OS=Homo sapiens OX=9606 GN=TGM5 PE=1 SV=4	18.2135	22.0328	0	1	-3.81933	-3.81419	6.32325e-07	8.48059e-06	No	No	No		3.72936
O43663	PRC1	8	sp|O43663|PRC1_HUMAN Protein regulator of cytokinesis 1 OS=Homo sapiens OX=9606 GN=PRC1 PE=1 SV=2	18.3042	20.2398	0	1	-1.93558	-1.93298	2.55169e-10	2.49336e-08	No	No	Yes	2.34796	2.53975
O43684	BUB3	11	sp|O43684|BUB3_HUMAN Mitotic checkpoint protein BUB3 OS=Homo sapiens OX=9606 GN=BUB3 PE=1 SV=1	22.3947	21.7448	4	3	0.649989	0.649115	0.580232	0.700455	No	No	Yes	2.35168	2.76958
O43707	ACTN4	40	sp|O43707|ACTN4_HUMAN Alpha-actinin-4 OS=Homo sapiens OX=9606 GN=ACTN4 PE=1 SV=2	18.2314	21.2655	0	1	-3.03414	-3.03006	2.04513e-06	2.09668e-05	No	No	Yes	2.13806	3.50468
O43818	RRP9	14	sp|O43818|U3IP2_HUMAN U3 small nucleolar RNA-interacting protein 2 OS=Homo sapiens OX=9606 GN=RRP9 PE=1 SV=1	21.0351	18.653	3	0	2.38203	2.37883	0.0294907	0.083354	No	No	Yes	0.977429	3.36301
O60264	SMARCA5	35	sp|O60264|SMCA5_HUMAN SWI/SNF-related matrix-associated actin-dependent regulator of chromatin subfamily A member 5 OS=Homo sapiens OX=9606 GN=SMARCA5 PE=1 SV=1	22.4931	18.6504	2	0	3.84264	3.83747	1.90355e-08	5.66099e-07	Yes	Yes	Yes	2.26946	3.441
O60437	PPL	6	sp|O60437|PEPL_HUMAN Periplakin OS=Homo sapiens OX=9606 GN=PPL PE=1 SV=4	18.2518	22.9393	0	1	-4.68754	-4.68123	1.08147e-05	6.91331e-05	No	No	No		3.27224
O60506	SYNCRIP	25	sp|O60506|HNRPQ_HUMAN Heterogeneous nuclear ribonucleoprotein Q OS=Homo sapiens OX=9606 GN=SYNCRIP PE=1 SV=2	20.8241	18.6606	3	0	2.16351	2.1606	0.0374422	0.0996516	No	No	Yes	2.39538	2.99872
O60716	CTNND1	32	sp|O60716|CTND1_HUMAN Catenin delta-1 OS=Homo sapiens OX=9606 GN=CTNND1 PE=1 SV=1	20.4172	20.2379	3	3	0.179344	0.179103	0.801764	0.87745	No	No	Yes	1.63031	3.43935
O60832	DKC1	22	sp|O60832|DKC1_HUMAN H/ACA ribonucleoprotein complex subunit DKC1 OS=Homo sapiens OX=9606 GN=DKC1 PE=1 SV=3	20.189	18.6431	1	0	1.54591	1.54383	3.40284e-05	0.000169894	No	No	Yes	2.32571	3.53077
O75131	CPNE3	17	sp|O75131|CPNE3_HUMAN Copine-3 OS=Homo sapiens OX=9606 GN=CPNE3 PE=1 SV=1	21.9652	18.6235	1	0	3.34169	3.3372	1.88677e-05	0.000105783	No	No	Yes	1.87117	3.62885
O75152	ZC3H11A	16	sp|O75152|ZC11A_HUMAN Zinc finger CCCH domain-containing protein 11A OS=Homo sapiens OX=9606 GN=ZC3H11A PE=1 SV=3	20.9452	18.6337	2	0	2.31147	2.30836	0.0115974	0.0365557	Yes	Yes	Yes	2.0779	2.95161
O75223	GGCT	8	sp|O75223|GGCT_HUMAN Gamma-glutamylcyclotransferase OS=Homo sapiens OX=9606 GN=GGCT PE=1 SV=1	23.8428	23.8728	4	4	-0.0300793	-0.0300389	0.88604	0.934009	No	No	Yes	2.02811	3.31425
O75342	ALOX12B	9	sp|O75342|LX12B_HUMAN Arachidonate 12-lipoxygenase, 12R-type OS=Homo sapiens OX=9606 GN=ALOX12B PE=1 SV=1	23.6559	23.6331	4	4	0.0228119	0.0227813	0.862943	0.925161	No	No	No		3.45791
O75367	H2AFY	18	sp|O75367|H2AY_HUMAN Core histone macro-H2A.1 OS=Homo sapiens OX=9606 GN=MACROH2A1 PE=1 SV=4	21.5905	18.659	1	0	2.93149	2.92755	6.5045e-06	4.70457e-05	No	No	Yes	2.10494	3.22564
O75369	FLNB	78	sp|O75369|FLNB_HUMAN Filamin-B OS=Homo sapiens OX=9606 GN=FLNB PE=1 SV=2	18.5888	18.6029	2	0	-0.0141228	-0.0141038	0.808866	0.882399	No	No	Yes	1.93142	3.92708
O75390	CS	22	sp|O75390|CISY_HUMAN Citrate synthase, mitochondrial OS=Homo sapiens OX=9606 GN=CS PE=1 SV=2	21.4301	21.0833	4	4	0.346789	0.346322	0.366534	0.530908	No	No	Yes	1.84967	3.43159
O75400	PRPF40A	17	sp|O75400|PR40A_HUMAN Pre-mRNA-processing factor 40 homolog A OS=Homo sapiens OX=9606 GN=PRPF40A PE=1 SV=2	21.4569	21.6471	1	1	-0.190138	-0.189883	0.0740836	0.179057	No	No	Yes	2.64748	3.32802
O75494	SRSF10	7	sp|O75494|SRS10_HUMAN Serine/arginine-rich splicing factor 10 OS=Homo sapiens OX=9606 GN=SRSF10 PE=1 SV=1	23.6787	21.9992	4	3	1.67947	1.67722	0.230297	0.392825	No	No	Yes	2.30374	2.09663
O75533	SF3B1	59	sp|O75533|SF3B1_HUMAN Splicing factor 3B subunit 1 OS=Homo sapiens OX=9606 GN=SF3B1 PE=1 SV=3	20.0794	18.6228	3	0	1.45667	1.45471	0.0190892	0.0567697	No	No	Yes	2.25363	3.74126
O75635	SERPINB7	2	sp|O75635|SPB7_HUMAN Serpin B7 OS=Homo sapiens OX=9606 GN=SERPINB7 PE=1 SV=1	18.285	20.689	0	1	-2.40396	-2.40073	2.31104e-07	4.07939e-06	No	No	No
O75643	SNRNP200	96	sp|O75643|U520_HUMAN U5 small nuclear ribonucleoprotein 200 kDa helicase OS=Homo sapiens OX=9606 GN=SNRNP200 PE=1 SV=2	21.4448	21.7175	3	2	-0.272777	-0.27241	0.742426	0.828416	No	No	Yes	2.18205	4.11775
O75665	OFD1	21	sp|O75665|OFD1_HUMAN Oral-facial-digital syndrome 1 protein OS=Homo sapiens OX=9606 GN=OFD1 PE=1 SV=1	23.2668	22.1814	4	3	1.08533	1.08387	0.431863	0.583949	No	No	Yes	1.85957	2.1119
O94906	PRPF6	31	sp|O94906|PRP6_HUMAN Pre-mRNA-processing factor 6 OS=Homo sapiens OX=9606 GN=PRPF6 PE=1 SV=1	21.365	21.3073	3	2	0.0576606	0.0575831	0.946386	0.967606	No	No	Yes	1.92199	3.53033
O94986	CEP152	59	sp|O94986|CE152_HUMAN Centrosomal protein of 152 kDa OS=Homo sapiens OX=9606 GN=CEP152 PE=1 SV=4	25.6539	25.86	4	4	-0.206156	-0.205878	0.130164	0.268978	No	No	Yes	1.95343	3.24025
O95232	LUC7L3	13	sp|O95232|LC7L3_HUMAN Luc7-like protein 3 OS=Homo sapiens OX=9606 GN=LUC7L3 PE=1 SV=2	21.8373	21.7521	3	3	0.0851872	0.0850727	0.952765	0.972674	No	No	Yes	2.89469	2.69759
O95239	KIF4A	32	sp|O95239|KIF4A_HUMAN Chromosome-associated kinesin KIF4A OS=Homo sapiens OX=9606 GN=KIF4A PE=1 SV=3;sp|Q2VIQ3|KIF4B_HUMAN Chromosome-associated kinesin KIF4B OS=Homo sapiens OX=9606 GN=KIF4B PE=2 SV=2	20.6329	20.9849	3	3	-0.352015	-0.351542	0.769838	0.853434	No	No	Yes	1.78791	3.38476
O95613	PCNT	119	sp|O95613|PCNT_HUMAN Pericentrin OS=Homo sapiens OX=9606 GN=PCNT PE=1 SV=4	27.8494	27.988	4	4	-0.138631	-0.138444	0.173566	0.327954	No	No	Yes	2.11797	3.51121
P00338	LDHA	27	sp|P00338|LDHA_HUMAN L-lactate dehydrogenase A chain OS=Homo sapiens OX=9606 GN=LDHA PE=1 SV=2	24.683	24.4563	4	4	0.226711	0.226406	0.388054	0.54615	No	No	Yes	2.55483	3.38709
P00488	F13A1	3	sp|P00488|F13A_HUMAN Coagulation factor XIII A chain OS=Homo sapiens OX=9606 GN=F13A1 PE=1 SV=4	21.5561	18.6237	1	0	2.93242	2.92848	1.24771e-05	7.68858e-05	No	No	No		3.52423
P00491	PNP	13	sp|P00491|PNPH_HUMAN Purine nucleoside phosphorylase OS=Homo sapiens OX=9606 GN=PNP PE=1 SV=2	20.333	21.7847	2	1	-1.45166	-1.44971	0.00108298	0.00374119	No	No	Yes	1.35783	3.18101
P00558	PGK1	35	sp|P00558|PGK1_HUMAN Phosphoglycerate kinase 1 OS=Homo sapiens OX=9606 GN=PGK1 PE=1 SV=3	23.9526	23.7514	4	4	0.201248	0.200978	0.436183	0.587302	No	No	Yes	2.38671	2.94241
P00738	HP	10	sp|P00738|HPT_HUMAN Haptoglobin OS=Homo sapiens OX=9606 GN=HP PE=1 SV=1;sp|P00739|HPTR_HUMAN Haptoglobin-related protein OS=Homo sapiens OX=9606 GN=HPR PE=2 SV=2	24.6061	25.206	4	4	-0.599917	-0.59911	0.0836122	0.195601	No	No	No
P01008	SERPINC1	2	sp|P01008|ANT3_HUMAN Antithrombin-III OS=Homo sapiens OX=9606 GN=SERPINC1 PE=1 SV=1	18.2001	18.9073	0	1	-0.707269	-0.706318	0.00043222	0.00158096	No	No	No
P01009	SERPINA1	9	sp|P01009|A1AT_HUMAN Alpha-1-antitrypsin OS=Homo sapiens OX=9606 GN=SERPINA1 PE=1 SV=3	24.7532	25.1971	4	4	-0.443919	-0.443322	0.17509	0.329015	No	No	No
P01011	SERPINA3	2	sp|P01011|AACT_HUMAN Alpha-1-antichymotrypsin OS=Homo sapiens OX=9606 GN=SERPINA3 PE=1 SV=2	18.2247	21.6495	0	1	-3.42478	-3.42017	1.6423e-05	9.49193e-05	No	No	No
P01023	A2M	13	sp|P01023|A2MG_HUMAN Alpha-2-macroglobulin OS=Homo sapiens OX=9606 GN=A2M PE=1 SV=3	23.3364	23.7538	4	4	-0.417422	-0.416861	0.174498	0.328807	No	No	No
P01024	C3	16	sp|P01024|CO3_HUMAN Complement C3 OS=Homo sapiens OX=9606 GN=C3 PE=1 SV=2	22.613	23.3607	4	4	-0.747759	-0.746754	0.217985	0.378795	No	No	Yes	0.00963021
P01040	CSTA	9	sp|P01040|CYTA_HUMAN Cystatin-A OS=Homo sapiens OX=9606 GN=CSTA PE=1 SV=1	24.5215	24.6181	4	4	-0.0965731	-0.0964432	0.567464	0.69065	No	No	Yes	-0.228309	1.56608
P01130	LDLR	5	sp|P01130|LDLR_HUMAN Low-density lipoprotein receptor OS=Homo sapiens OX=9606 GN=LDLR PE=1 SV=1	18.2162	23.2535	0	1	-5.03728	-5.03051	2.8426e-06	2.55834e-05	No	No	Yes	1.55667	3.53279
P01137	TGFB1	3	sp|P01137|TGFB1_HUMAN Transforming growth factor beta-1 proprotein OS=Homo sapiens OX=9606 GN=TGFB1 PE=1 SV=2	18.275	20.3933	0	1	-2.11829	-2.11544	7.94783e-06	5.38249e-05	No	No	Yes	0.659617
P01591	IGJ	3	sp|P01591|IGJ_HUMAN Immunoglobulin J chain OS=Homo sapiens OX=9606 GN=JCHAIN PE=1 SV=4	18.235	25.4441	0	1	-7.20909	-7.1994	2.50985e-08	6.86696e-07	No	No	No		3.04197
P01833	PIGR	3	sp|P01833|PIGR_HUMAN Polymeric immunoglobulin receptor OS=Homo sapiens OX=9606 GN=PIGR PE=1 SV=4	18.1956	24.9868	0	1	-6.79113	-6.782	1.21848e-06	1.41261e-05	No	No	No		3.79636
P01834	IGKC	7	sp|P01834|IGKC_HUMAN Immunoglobulin kappa constant OS=Homo sapiens OX=9606 GN=IGKC PE=1 SV=2;sp|P0DOX7|IGK_HUMAN Immunoglobulin kappa light chain OS=Homo sapiens OX=9606 PE=1 SV=1	20.8617	22.4257	3	2	-1.56401	-1.5619	0.118409	0.256302	No	No	No		2.53362
P01861	IGHG4	0	sp|P01861|IGHG4_HUMAN Immunoglobulin heavy constant gamma 4 OS=Homo sapiens OX=9606 GN=IGHG4 PE=1 SV=1	18.2565	19.9795	0	1	-1.72296	-1.72064	3.22769e-05	0.000164757	No	No	No
P01876	IGHA1	4	sp|P01876|IGHA1_HUMAN Immunoglobulin heavy constant alpha 1 OS=Homo sapiens OX=9606 GN=IGHA1 PE=1 SV=2	24.5748	25.7923	4	4	-1.21748	-1.21584	0.133602	0.271514	No	No	No		3.19572
P01877	IGHA2	2	sp|P01877|IGHA2_HUMAN Immunoglobulin heavy constant alpha 2 OS=Homo sapiens OX=9606 GN=IGHA2 PE=1 SV=4;sp|P0DOX2|IGA2_HUMAN Immunoglobulin alpha-2 heavy chain OS=Homo sapiens OX=9606 PE=1 SV=2	18.2568	23.2624	0	1	-5.00564	-4.99891	7.839e-06	5.38249e-05	No	No	No		3.12677
P02452	COL1A1	26	sp|P02452|CO1A1_HUMAN Collagen alpha-1(I) chain OS=Homo sapiens OX=9606 GN=COL1A1 PE=1 SV=5	23.5368	24.5911	1	2	-1.05429	-1.05287	0.00068902	0.00245464	Yes	Yes	Yes	1.25219	3.33712
P02462	COL4A1	7	sp|P02462|CO4A1_HUMAN Collagen alpha-1(IV) chain OS=Homo sapiens OX=9606 GN=COL4A1 PE=1 SV=4	23.9939	24.4383	4	4	-0.444445	-0.443847	0.01397	0.043434	No	No	Yes	1.31427	3.42928
P02545	LMNA	64	sp|P02545|LMNA_HUMAN Prelamin-A/C OS=Homo sapiens OX=9606 GN=LMNA PE=1 SV=1	25.1718	25.4818	4	4	-0.310033	-0.309616	0.548793	0.676351	No	No	No		3.02291
P02647	APOA1	4	sp|P02647|APOA1_HUMAN Apolipoprotein A-I OS=Homo sapiens OX=9606 GN=APOA1 PE=1 SV=1	21.2588	21.9122	1	2	-0.653437	-0.652558	0.00144747	0.00492571	No	No	No
P02679	FGG	6	sp|P02679|FIBG_HUMAN Fibrinogen gamma chain OS=Homo sapiens OX=9606 GN=FGG PE=1 SV=3	24.695	18.6663	1	0	6.02861	6.0205	2.35658e-06	2.32576e-05	No	No	No		3.28985
P02751	FN1	125	sp|P02751|FINC_HUMAN Fibronectin OS=Homo sapiens OX=9606 GN=FN1 PE=1 SV=5	28.471	27.9441	4	4	0.526941	0.526233	0.189547	0.346658	No	No	Yes	2.03093	4.04111
P02787	TF	18	sp|P02787|TRFE_HUMAN Serotransferrin OS=Homo sapiens OX=9606 GN=TF PE=1 SV=3	24.5477	24.9643	4	4	-0.416635	-0.416074	0.221209	0.382089	No	No	No
P02788	LTF	17	sp|P02788|TRFL_HUMAN Lactotransferrin OS=Homo sapiens OX=9606 GN=LTF PE=1 SV=6	21.9875	24.6529	3	4	-2.6654	-2.66181	0.163223	0.314433	No	No	No		3.59248
P02790	HPX	2	sp|P02790|HEMO_HUMAN Hemopexin OS=Homo sapiens OX=9606 GN=HPX PE=1 SV=2	18.2421	20.596	0	1	-2.35391	-2.35074	1.97048e-06	2.09668e-05	No	No	No
P04040	CAT	28	sp|P04040|CATA_HUMAN Catalase OS=Homo sapiens OX=9606 GN=CAT PE=1 SV=3	24.6136	24.6286	4	4	-0.0150036	-0.0149834	0.903644	0.943653	No	No	Yes	1.43288	3.3085
P04075	ALDOA	33	sp|P04075|ALDOA_HUMAN Fructose-bisphosphate aldolase A OS=Homo sapiens OX=9606 GN=ALDOA PE=1 SV=2	23.9891	23.799	4	4	0.190067	0.189811	0.703147	0.800254	No	No	Yes	2.12517	3.1563
P04080	CSTB	4	sp|P04080|CYTB_HUMAN Cystatin-B OS=Homo sapiens OX=9606 GN=CSTB PE=1 SV=2	22.7903	18.6165	1	0	4.1738	4.16819	5.98233e-05	0.000267445	No	No	Yes	1.88721	1.67154
P04083	ANXA1	27	sp|P04083|ANXA1_HUMAN Annexin A1 OS=Homo sapiens OX=9606 GN=ANXA1 PE=1 SV=2	22.2407	22.2093	2	3	0.0314156	0.0313734	0.977849	0.989721	No	No	Yes	0.85603	3.15554
P04114	APOB	11	sp|P04114|APOB_HUMAN Apolipoprotein B-100 OS=Homo sapiens OX=9606 GN=APOB PE=1 SV=2	25.2475	25.6619	4	4	-0.414407	-0.41385	0.0545453	0.136663	No	No	No		4.11356
P04181	OAT	29	sp|P04181|OAT_HUMAN Ornithine aminotransferase, mitochondrial OS=Homo sapiens OX=9606 GN=OAT PE=1 SV=1	20.7162	18.6775	1	0	2.03867	2.03592	2.043e-06	2.09668e-05	No	No	Yes	1.80626	3.37523
P04259	KRT6B	4	sp|P04259|K2C6B_HUMAN Keratin, type II cytoskeletal 6B OS=Homo sapiens OX=9606 GN=KRT6B PE=1 SV=5	26.2822	26.168	2	2	0.114252	0.114098	0.508062	0.643546	No	No	No		2.18845
P04406	GAPDH	32	sp|P04406|G3P_HUMAN Glyceraldehyde-3-phosphate dehydrogenase OS=Homo sapiens OX=9606 GN=GAPDH PE=1 SV=3	27.1632	27.3188	4	4	-0.155624	-0.155415	0.341628	0.513185	No	No	Yes	2.69315	2.94397
P04637	TP53	13	sp|P04637|P53_HUMAN Cellular tumor antigen p53 OS=Homo sapiens OX=9606 GN=TP53 PE=1 SV=4	21.1411	18.6592	2	0	2.48189	2.47856	0.00251289	0.00850899	Yes	Yes	Yes	1.55418	2.86764
P04792	HSPB1	23	sp|P04792|HSPB1_HUMAN Heat shock protein beta-1 OS=Homo sapiens OX=9606 GN=HSPB1 PE=1 SV=2	23.1756	23.4112	4	4	-0.235605	-0.235288	0.644225	0.7456	No	No	Yes	1.72426
P04899	GNAI2	12	sp|P04899|GNAI2_HUMAN Guanine nucleotide-binding protein G(i) subunit alpha-2 OS=Homo sapiens OX=9606 GN=GNAI2 PE=1 SV=3	20.3816	18.6352	1	0	1.74637	1.74402	0.00022025	0.000855973	No	No	No		3.33311
P05089	ARG1	13	sp|P05089|ARGI1_HUMAN Arginase-1 OS=Homo sapiens OX=9606 GN=ARG1 PE=1 SV=2	25.2211	25.2196	4	4	0.00155518	0.00155309	0.99258	0.995491	No	No	No		3.32248
P05090	APOD	3	sp|P05090|APOD_HUMAN Apolipoprotein D OS=Homo sapiens OX=9606 GN=APOD PE=1 SV=1	18.2708	21.2799	0	1	-3.00905	-3.005	3.88087e-06	3.23721e-05	No	No	No
P05109	S100A8	13	sp|P05109|S10A8_HUMAN Protein S100-A8 OS=Homo sapiens OX=9606 GN=S100A8 PE=1 SV=1	25.4835	26.4646	4	4	-0.981087	-0.979767	0.317059	0.491765	No	No	No		2.77463
P05141	SLC25A5	15	sp|P05141|ADT2_HUMAN ADP/ATP translocase 2 OS=Homo sapiens OX=9606 GN=SLC25A5 PE=1 SV=7	27.3514	27.2955	4	4	0.0559261	0.0558509	0.734526	0.820941	No	No	Yes	2.63062	3.51006
P05198	EIF2S1	23	sp|P05198|IF2A_HUMAN Eukaryotic translation initiation factor 2 subunit 1 OS=Homo sapiens OX=9606 GN=EIF2S1 PE=1 SV=3	21.7016	22.5002	2	1	-0.798652	-0.797578	0.00334558	0.0112175	No	No	Yes	1.46094	3.05949
P05204	HMGN2	4	sp|P05204|HMGN2_HUMAN Non-histone chromosomal protein HMG-17 OS=Homo sapiens OX=9606 GN=HMGN2 PE=1 SV=3	22.9646	24.0511	3	4	-1.08651	-1.08505	0.470486	0.617682	No	No	Yes	1.39185
P05387	RPLP2	8	sp|P05387|RLA2_HUMAN 60S acidic ribosomal protein P2 OS=Homo sapiens OX=9606 GN=RPLP2 PE=1 SV=1	22.0361	21.4069	2	3	0.629199	0.628353	0.491131	0.6343	No	No	Yes	2.83598	2.68518
P05388	RPLP0	17	sp|P05388|RLA0_HUMAN 60S acidic ribosomal protein P0 OS=Homo sapiens OX=9606 GN=RPLP0 PE=1 SV=1;sp|Q8NHW5|RLA0L_HUMAN 60S acidic ribosomal protein P0-like OS=Homo sapiens OX=9606 GN=RPLP0P6 PE=5 SV=1	25.0091	24.692	4	4	0.317069	0.316643	0.107875	0.241375	No	No	Yes	2.832	3.15087
P05783	KRT18	28	sp|P05783|K1C18_HUMAN Keratin, type I cytoskeletal 18 OS=Homo sapiens OX=9606 GN=KRT18 PE=1 SV=2	21.6628	21.9471	1	2	-0.284325	-0.283943	0.074385	0.179153	No	No	Yes	1.05664	2.41482
P06396	GSN	6	sp|P06396|GELS_HUMAN Gelsolin OS=Homo sapiens OX=9606 GN=GSN PE=1 SV=1	21.2301	21.5264	4	4	-0.296268	-0.29587	0.12457	0.262981	No	No	Yes	1.04236	3.56454
P06576	ATP5B	31	sp|P06576|ATPB_HUMAN ATP synthase subunit beta, mitochondrial OS=Homo sapiens OX=9606 GN=ATP5F1B PE=1 SV=3	19.9335	20.3795	3	3	-0.446059	-0.44546	0.609096	0.718236	No	No	Yes	2.29779	3.52404
P06702	S100A9	12	sp|P06702|S10A9_HUMAN Protein S100-A9 OS=Homo sapiens OX=9606 GN=S100A9 PE=1 SV=1	26.1432	26.9351	4	4	-0.791984	-0.790919	0.367134	0.530908	No	No	No		2.47104
P06733	ENO1	37	sp|P06733|ENOA_HUMAN Alpha-enolase OS=Homo sapiens OX=9606 GN=ENO1 PE=1 SV=2	24.5817	24.9591	4	4	-0.377367	-0.376859	0.111371	0.247331	No	No	Yes	2.60272	2.71372
P06748	NPM1	27	sp|P06748|NPM_HUMAN Nucleophosmin OS=Homo sapiens OX=9606 GN=NPM1 PE=1 SV=2	28.1275	27.945	4	4	0.182522	0.182276	0.179058	0.334634	No	No	Yes	2.90037	1.44762
P07195	LDHB	21	sp|P07195|LDHB_HUMAN L-lactate dehydrogenase B chain OS=Homo sapiens OX=9606 GN=LDHB PE=1 SV=2	23.6774	23.4017	4	2	0.275628	0.275257	0.581494	0.700455	No	No	Yes	2.62563	3.3374
P07305	H1F0	8	sp|P07305|H10_HUMAN Histone H1.0 OS=Homo sapiens OX=9606 GN=H1-0 PE=1 SV=3	22.7458	22.9481	4	4	-0.202338	-0.202066	0.291559	0.465736	No	No	Yes	1.83796	2.39387
P07339	CTSD	18	sp|P07339|CATD_HUMAN Cathepsin D OS=Homo sapiens OX=9606 GN=CTSD PE=1 SV=1	23.8744	22.8515	4	3	1.02289	1.02152	0.48865	0.633023	No	No	Yes	1.74354	3.48327
P07355	ANXA2	44	sp|P07355|ANXA2_HUMAN Annexin A2 OS=Homo sapiens OX=9606 GN=ANXA2 PE=1 SV=2;sp|A6NMY6|AXA2L_HUMAN Putative annexin A2-like protein OS=Homo sapiens OX=9606 GN=ANXA2P2 PE=5 SV=2	26.0709	26.225	4	4	-0.154094	-0.153887	0.163652	0.314433	No	No	Yes	1.73583	3.28407
P07384	CAPN1	14	sp|P07384|CAN1_HUMAN Calpain-1 catalytic subunit OS=Homo sapiens OX=9606 GN=CAPN1 PE=1 SV=1	22.0168	21.9127	4	4	0.104048	0.103908	0.581266	0.700455	No	No	Yes	1.16008	3.54499
P07437	TUBB	7	sp|P07437|TBB5_HUMAN Tubulin beta chain OS=Homo sapiens OX=9606 GN=TUBB PE=1 SV=2	24.0727	24.1934	4	4	-0.120624	-0.120461	0.509497	0.64417	No	No	Yes	2.81826	2.9807
P07476	IVL	6	sp|P07476|INVO_HUMAN Involucrin OS=Homo sapiens OX=9606 GN=IVL PE=1 SV=2	18.2333	22.6818	0	1	-4.44847	-4.44249	9.8919e-10	5.63838e-08	No	No	No
P07737	PFN1	10	sp|P07737|PROF1_HUMAN Profilin-1 OS=Homo sapiens OX=9606 GN=PFN1 PE=1 SV=2	22.912	23.0225	4	4	-0.110512	-0.110363	0.584104	0.701296	No	No	Yes	2.09151	2.92896
P07741	APRT	12	sp|P07741|APT_HUMAN Adenine phosphoribosyltransferase OS=Homo sapiens OX=9606 GN=APRT PE=1 SV=2	20.0785	19.9431	1	2	0.135357	0.135175	0.366292	0.530908	No	No	Yes	1.91787	2.42017
P07814	EPRS	70	sp|P07814|SYEP_HUMAN Bifunctional glutamate/proline--tRNA ligase OS=Homo sapiens OX=9606 GN=EPRS1 PE=1 SV=5	21.8656	21.6207	3	3	0.244867	0.244537	0.855565	0.920136	No	No	Yes	2.63395	3.59565
P07900	HSP90AA1	38	sp|P07900|HS90A_HUMAN Heat shock protein HSP 90-alpha OS=Homo sapiens OX=9606 GN=HSP90AA1 PE=1 SV=5	24.706	22.7804	4	3	1.92561	1.92302	0.23531	0.397286	No	No	Yes	3.27342	3.55723
P07910	HNRNPC	23	sp|P07910|HNRPC_HUMAN Heterogeneous nuclear ribonucleoproteins C1/C2 OS=Homo sapiens OX=9606 GN=HNRNPC PE=1 SV=4	24.8796	24.1376	4	4	0.741992	0.740994	0.207809	0.366344	No	No	Yes	2.4246	2.82873
P08123	COL1A2	2	sp|P08123|CO1A2_HUMAN Collagen alpha-2(I) chain OS=Homo sapiens OX=9606 GN=COL1A2 PE=1 SV=7	18.2257	20.9327	0	1	-2.70708	-2.70344	2.45926e-06	2.3692e-05	No	No	No
P08174	CD55	2	sp|P08174|DAF_HUMAN Complement decay-accelerating factor OS=Homo sapiens OX=9606 GN=CD55 PE=1 SV=4	18.2731	21.144	0	1	-2.87087	-2.86701	1.72938e-08	5.52432e-07	No	No	Yes	1.65034	3.33513
P08238	HSP90AB1	34	sp|P08238|HS90B_HUMAN Heat shock protein HSP 90-beta OS=Homo sapiens OX=9606 GN=HSP90AB1 PE=1 SV=4	26.5556	26.1579	4	4	0.397619	0.397084	0.0893853	0.205166	No	No	Yes	3.11713	3.54736
P08559	PDHA1	25	sp|P08559|ODPA_HUMAN Pyruvate dehydrogenase E1 component subunit alpha, somatic form, mitochondrial OS=Homo sapiens OX=9606 GN=PDHA1 PE=1 SV=3	22.2577	22.2013	4	4	0.0563428	0.0562671	0.815416	0.887699	No	No	Yes	2.05767	2.49877
P08572	COL4A2	16	sp|P08572|CO4A2_HUMAN Collagen alpha-2(IV) chain OS=Homo sapiens OX=9606 GN=COL4A2 PE=1 SV=4	21.5319	23.0677	3	1	-1.53582	-1.53375	0.125525	0.264183	No	No	Yes	1.58518	3.52947
P08621	SNRNP70	21	sp|P08621|RU17_HUMAN U1 small nuclear ribonucleoprotein 70 kDa OS=Homo sapiens OX=9606 GN=SNRNP70 PE=1 SV=2	23.317	21.7157	3	3	1.60123	1.59908	0.383282	0.542785	No	No	Yes	1.96174	2.57777
P08670	VIM	64	sp|P08670|VIME_HUMAN Vimentin OS=Homo sapiens OX=9606 GN=VIM PE=1 SV=4	28.3346	28.1097	4	4	0.224906	0.224603	0.265275	0.436173	No	No	Yes	2.68725	1.60173
P08708	RPS17	10	sp|P08708|RS17_HUMAN 40S ribosomal protein S17 OS=Homo sapiens OX=9606 GN=RPS17 PE=1 SV=2	25.2461	24.2469	4	4	0.999197	0.997854	0.112468	0.248276	No	No	Yes	2.85908	1.33304
P08754	GNAI3	13	sp|P08754|GNAI3_HUMAN Guanine nucleotide-binding protein G(i) subunit alpha OS=Homo sapiens OX=9606 GN=GNAI3 PE=1 SV=3	23.2852	22.2066	4	3	1.0786	1.07715	0.399041	0.554764	No	No	No		3.48008
P08758	ANXA5	25	sp|P08758|ANXA5_HUMAN Annexin A5 OS=Homo sapiens OX=9606 GN=ANXA5 PE=1 SV=2	20.4409	21.0648	1	1	-0.623861	-0.623022	0.000129985	0.000529226	No	No	Yes	2.00561	3.45922
P08865	RPSA	14	sp|P08865|RSSA_HUMAN 40S ribosomal protein SA OS=Homo sapiens OX=9606 GN=RPSA PE=1 SV=4	25.1462	24.9965	4	4	0.149707	0.149506	0.513074	0.647495	No	No	Yes	2.24723	3.2362
P09012	SNRPA	9	sp|P09012|SNRPA_HUMAN U1 small nuclear ribonucleoprotein A OS=Homo sapiens OX=9606 GN=SNRPA PE=1 SV=3	22.2954	22.5284	3	2	-0.232984	-0.232671	0.833747	0.902346	No	No	Yes	1.66874	3.10511
P09211	GSTP1	12	sp|P09211|GSTP1_HUMAN Glutathione S-transferase P OS=Homo sapiens OX=9606 GN=GSTP1 PE=1 SV=2	22.5419	22.2234	2	1	0.318559	0.318131	0.206282	0.364592	No	No	Yes	2.2831	2.85783
P09651	HNRNPA1	31	sp|P09651|ROA1_HUMAN Heterogeneous nuclear ribonucleoprotein A1 OS=Homo sapiens OX=9606 GN=HNRNPA1 PE=1 SV=5;sp|Q32P51|RA1L2_HUMAN Heterogeneous nuclear ribonucleoprotein A1-like 2 OS=Homo sapiens OX=9606 GN=HNRNPA1L2 PE=2 SV=2	25.3109	24.667	4	4	0.64384	0.642974	0.0229779	0.066597	No	No	Yes	2.67356	3.11115
P09661	SNRPA1	18	sp|P09661|RU2A_HUMAN U2 small nuclear ribonucleoprotein A OS=Homo sapiens OX=9606 GN=SNRPA1 PE=1 SV=2	21.3075	18.6466	1	0	2.66093	2.65735	8.46399e-08	1.92979e-06	No	No	Yes	1.35777	2.6093
P09874	PARP1	66	sp|P09874|PARP1_HUMAN Poly [ADP-ribose] polymerase 1 OS=Homo sapiens OX=9606 GN=PARP1 PE=1 SV=4	27.1329	26.5843	4	4	0.548598	0.54786	0.077848	0.185825	No	No	Yes	2.58344	3.26082
P0DMV9	HSPA1B	31	sp|P0DMV9|HS71B_HUMAN Heat shock 70 kDa protein 1B OS=Homo sapiens OX=9606 GN=HSPA1B PE=1 SV=1;sp|P0DMV8|HS71A_HUMAN Heat shock 70 kDa protein 1A OS=Homo sapiens OX=9606 GN=HSPA1A PE=1 SV=1	26.7795	26.5713	4	4	0.208156	0.207876	0.201113	0.359771	No	No	Yes	1.85988	3.04626
P0DN76	U2AF1	11	sp|P0DN76|U2AF5_HUMAN Splicing factor U2AF 35 kDa subunit-like protein OS=Homo sapiens OX=9606 GN=U2AF1L5 PE=1 SV=1;sp|Q01081|U2AF1_HUMAN Splicing factor U2AF 35 kDa subunit OS=Homo sapiens OX=9606 GN=U2AF1 PE=1 SV=3	22.5467	23.0694	3	4	-0.522738	-0.522035	0.670259	0.766651	No	No	Yes	0.897601	2.64768
P0DOX5	IGHG1	6	sp|P0DOX5|IGG1_HUMAN Immunoglobulin gamma-1 heavy chain OS=Homo sapiens OX=9606 PE=1 SV=2;sp|P01857|IGHG1_HUMAN Immunoglobulin heavy constant gamma 1 OS=Homo sapiens OX=9606 GN=IGHG1 PE=1 SV=1	23.4904	23.763	4	4	-0.272543	-0.272177	0.347004	0.517104	No	No	No		3.29043
P0DOY3	IGLC6	2	sp|P0DOY3|IGLC3_HUMAN Immunoglobulin lambda constant 3 OS=Homo sapiens OX=9606 GN=IGLC3 PE=1 SV=1;sp|P0DOY2|IGLC2_HUMAN Immunoglobulin lambda constant 2 OS=Homo sapiens OX=9606 GN=IGLC2 PE=1 SV=1;sp|P0CF74|IGLC6_HUMAN Immunoglobulin lambda constant 6 OS=Ho	21.5057	23.153	3	2	-1.64724	-1.64502	0.109438	0.24383	No	No	No		2.75824
P10412	HIST1H1E	3	sp|P10412|H14_HUMAN Histone H1.4 OS=Homo sapiens OX=9606 GN=H1-4 PE=1 SV=2	28.6272	28.7469	4	4	-0.119684	-0.119524	0.53	0.66376	No	No	Yes	1.52602	0.462398
P10599	TXN	10	sp|P10599|THIO_HUMAN Thioredoxin OS=Homo sapiens OX=9606 GN=TXN PE=1 SV=3	22.394	22.3551	3	3	0.0388316	0.0387794	0.981045	0.989721	No	No	Yes	2.37586	2.36657
P10809	HSPD1	65	sp|P10809|CH60_HUMAN 60 kDa heat shock protein, mitochondrial OS=Homo sapiens OX=9606 GN=HSPD1 PE=1 SV=2	24.1201	23.605	4	4	0.515106	0.514413	0.0545064	0.136663	No	No	Yes	2.58194	3.16077
P11021	HSPA5	47	sp|P11021|BIP_HUMAN Endoplasmic reticulum chaperone BiP OS=Homo sapiens OX=9606 GN=HSPA5 PE=1 SV=2	24.0933	24.1229	4	4	-0.0295598	-0.0295201	0.918583	0.950545	No	No	Yes	2.60597	3.13604
P11142	HSPA8	33	sp|P11142|HSP7C_HUMAN Heat shock cognate 71 kDa protein OS=Homo sapiens OX=9606 GN=HSPA8 PE=1 SV=1	26.517	26.3683	4	4	0.148686	0.148486	0.194211	0.354241	No	No	Yes	1.75129	3.11495
P11177	PDHB	18	sp|P11177|ODPB_HUMAN Pyruvate dehydrogenase E1 component subunit beta, mitochondrial OS=Homo sapiens OX=9606 GN=PDHB PE=1 SV=3	22.7942	21.3899	4	3	1.40431	1.40243	0.22543	0.388399	No	No	Yes	1.74557	2.94368
P11310	ACADM	18	sp|P11310|ACADM_HUMAN Medium-chain specific acyl-CoA dehydrogenase, mitochondrial OS=Homo sapiens OX=9606 GN=ACADM PE=1 SV=1	20.5737	18.7112	3	0	1.86256	1.86005	0.0234449	0.0675191	No	No	Yes	2.02299	3.08785
P11387	TOP1	33	sp|P11387|TOP1_HUMAN DNA topoisomerase 1 OS=Homo sapiens OX=9606 GN=TOP1 PE=1 SV=2	22.3376	22.0982	4	2	0.239391	0.239069	0.597328	0.711799	No	No	Yes	2.5478	3.25819
P11388	TOP2A	76	sp|P11388|TOP2A_HUMAN DNA topoisomerase 2-alpha OS=Homo sapiens OX=9606 GN=TOP2A PE=1 SV=3	22.9156	22.412	4	4	0.503594	0.502917	0.36678	0.530908	No	No	Yes	2.99595	3.60723
P11586	MTHFD1	49	sp|P11586|C1TC_HUMAN C-1-tetrahydrofolate synthase, cytoplasmic OS=Homo sapiens OX=9606 GN=MTHFD1 PE=1 SV=3	21.5592	21.3706	4	4	0.18864	0.188386	0.279152	0.452465	No	No	Yes	1.90365	3.54681
P11940	PABPC1	20	sp|P11940|PABP1_HUMAN Polyadenylate-binding protein 1 OS=Homo sapiens OX=9606 GN=PABPC1 PE=1 SV=2	22.9303	21.717	4	3	1.21328	1.21165	0.30535	0.480827	No	No	Yes	3.28958	2.87575
P12236	SLC25A6	7	sp|P12236|ADT3_HUMAN ADP/ATP translocase 3 OS=Homo sapiens OX=9606 GN=SLC25A6 PE=1 SV=4	21.8856	22.5079	3	4	-0.622332	-0.621496	0.5567	0.681186	No	No	Yes	2.31041	3.49761
P12268	IMPDH2	26	sp|P12268|IMDH2_HUMAN Inosine-5-monophosphate dehydrogenase 2 OS=Homo sapiens OX=9606 GN=IMPDH2 PE=1 SV=2	21.8881	21.6389	4	4	0.249235	0.2489	0.114697	0.252261	No	No	Yes	2.17444	2.98837
P12273	PIP	6	sp|P12273|PIP_HUMAN Prolactin-inducible protein OS=Homo sapiens OX=9606 GN=PIP PE=1 SV=1	22.977	22.8841	4	4	0.0929526	0.0928276	0.712995	0.80171	No	No	No		3.32713
P12277	CKB	25	sp|P12277|KCRB_HUMAN Creatine kinase B-type OS=Homo sapiens OX=9606 GN=CKB PE=1 SV=1	21.2404	21.1423	3	2	0.0980577	0.0979258	0.902101	0.943481	No	No	Yes	2.59435	2.95353
P12532	CKMT1A	16	sp|P12532|KCRU_HUMAN Creatine kinase U-type, mitochondrial OS=Homo sapiens OX=9606 GN=CKMT1A PE=1 SV=1	22.674	23.9849	3	4	-1.3109	-1.30913	0.345989	0.516717	No	No	Yes	1.25076	2.94655
P12814	ACTN1	50	sp|P12814|ACTN1_HUMAN Alpha-actinin-1 OS=Homo sapiens OX=9606 GN=ACTN1 PE=1 SV=2	18.2757	21.7849	0	1	-3.5092	-3.50448	1.65137e-05	9.49193e-05	No	No	Yes	1.79857	3.55611
P12956	XRCC6	38	sp|P12956|XRCC6_HUMAN X-ray repair cross-complementing protein 6 OS=Homo sapiens OX=9606 GN=XRCC6 PE=1 SV=2	21.5061	20.9757	4	1	0.530386	0.529672	0.0357932	0.096388	No	No	Yes	1.99189	3.67224
P13010	XRCC5	48	sp|P13010|XRCC5_HUMAN X-ray repair cross-complementing protein 5 OS=Homo sapiens OX=9606 GN=XRCC5 PE=1 SV=3	21.2523	20.8667	3	2	0.385603	0.385085	0.620686	0.723252	No	No	Yes	2.48618	3.3641
P13639	EEF2	55	sp|P13639|EF2_HUMAN Elongation factor 2 OS=Homo sapiens OX=9606 GN=EEF2 PE=1 SV=4	25.7467	25.5888	4	4	0.157956	0.157744	0.460091	0.609888	No	No	Yes	3.00971	3.4023
P13797	PLS3	27	sp|P13797|PLST_HUMAN Plastin-3 OS=Homo sapiens OX=9606 GN=PLS3 PE=1 SV=4	18.6821	18.5869	1	0	0.0951502	0.0950223	0.391148	0.548155	No	No	Yes	2.47767	3.69905
P13804	ETFA	21	sp|P13804|ETFA_HUMAN Electron transfer flavoprotein subunit alpha, mitochondrial OS=Homo sapiens OX=9606 GN=ETFA PE=1 SV=1	20.5865	20.5643	1	1	0.0221936	0.0221637	0.712901	0.80171	No	No	Yes	2.18481	2.88935
P13987	CD59	3	sp|P13987|CD59_HUMAN CD59 glycoprotein OS=Homo sapiens OX=9606 GN=CD59 PE=1 SV=1	22.4812	18.6708	2	0	3.81037	3.80524	0.000167082	0.000664441	Yes	Yes	Yes	1.68193	3.27654
P14618	PKM	44	sp|P14618|KPYM_HUMAN Pyruvate kinase PKM OS=Homo sapiens OX=9606 GN=PKM PE=1 SV=4	24.8137	25.0249	4	4	-0.211182	-0.210898	0.56293	0.687578	No	No	Yes	2.30906	3.3375
P14625	HSP90B1	62	sp|P14625|ENPL_HUMAN Endoplasmin OS=Homo sapiens OX=9606 GN=HSP90B1 PE=1 SV=1	19.3424	18.9165	3	3	0.425899	0.425326	0.28271	0.454997	No	No	Yes	2.87128	3.60654
P14735	IDE	8	sp|P14735|IDE_HUMAN Insulin-degrading enzyme OS=Homo sapiens OX=9606 GN=IDE PE=1 SV=4	21.158	23.909	1	1	-2.75105	-2.74735	1.47521e-06	1.65417e-05	No	No	Yes	1.13843	3.58213
P14866	HNRNPL	32	sp|P14866|HNRPL_HUMAN Heterogeneous nuclear ribonucleoprotein L OS=Homo sapiens OX=9606 GN=HNRNPL PE=1 SV=2	24.4888	24.273	4	4	0.215853	0.215563	0.377788	0.540441	No	No	Yes	2.00217	3.41611
P14868	DARS	30	sp|P14868|SYDC_HUMAN Aspartate--tRNA ligase, cytoplasmic OS=Homo sapiens OX=9606 GN=DARS1 PE=1 SV=2	21.7278	20.5964	2	1	1.13136	1.12984	0.00568812	0.018527	Yes	Yes	Yes	2.1683	3.32407
P14923	JUP	38	sp|P14923|PLAK_HUMAN Junction plakoglobin OS=Homo sapiens OX=9606 GN=JUP PE=1 SV=3	28.5863	28.7363	4	4	-0.149951	-0.149749	0.326638	0.502068	No	No	Yes	1.15394	3.58246
P15104	GLUL	9	sp|P15104|GLNA_HUMAN Glutamine synthetase OS=Homo sapiens OX=9606 GN=GLUL PE=1 SV=4	18.1881	22.8807	0	1	-4.69259	-4.68628	9.17619e-06	6.0144e-05	No	No	Yes	1.83406	2.85207
P15880	RPS2	17	sp|P15880|RS2_HUMAN 40S ribosomal protein S2 OS=Homo sapiens OX=9606 GN=RPS2 PE=1 SV=2	23.7568	22.1886	4	3	1.56815	1.56604	0.252228	0.417733	No	No	Yes	2.85005	2.76018
P15924	DSP	242	sp|P15924|DESP_HUMAN Desmoplakin OS=Homo sapiens OX=9606 GN=DSP PE=1 SV=3	30.5829	30.8931	4	4	-0.310246	-0.309829	0.0665657	0.165567	No	No	Yes	2.23779	3.33942
P16403	HIST1H1C	3	sp|P16403|H12_HUMAN Histone H1.2 OS=Homo sapiens OX=9606 GN=H1-2 PE=1 SV=2	25.4495	25.4185	4	4	0.0309998	0.0309581	0.887582	0.934009	No	No	Yes	2.51454	0.462398
P17096	HMGA1	4	sp|P17096|HMGA1_HUMAN High mobility group protein HMG-I/HMG-Y OS=Homo sapiens OX=9606 GN=HMGA1 PE=1 SV=3	22.3224	18.6254	1	0	3.69704	3.69207	1.77683e-08	5.52432e-07	No	No	Yes	2.10012	0.332438
P17844	DDX5	32	sp|P17844|DDX5_HUMAN Probable ATP-dependent RNA helicase DDX5 OS=Homo sapiens OX=9606 GN=DDX5 PE=1 SV=1	26.5544	26.0649	4	4	0.489439	0.488781	0.0525519	0.133131	No	No	Yes	2.33348	3.26479
P17900	GM2A	6	sp|P17900|SAP3_HUMAN Ganglioside GM2 activator OS=Homo sapiens OX=9606 GN=GM2A PE=1 SV=4	18.2368	22.778	0	1	-4.54123	-4.53512	2.97974e-06	2.64694e-05	No	No	Yes	1.51828	3.03174
P17931	LGALS3	6	sp|P17931|LEG3_HUMAN Galectin-3 OS=Homo sapiens OX=9606 GN=LGALS3 PE=1 SV=5	21.9233	22.7468	1	1	-0.823453	-0.822346	0.000504579	0.00182609	No	No	Yes	0.306324	2.75078
P17987	TCP1	33	sp|P17987|TCPA_HUMAN T-complex protein 1 subunit alpha OS=Homo sapiens OX=9606 GN=TCP1 PE=1 SV=1	23.2233	23.1498	4	4	0.0735232	0.0734243	0.874567	0.933235	No	No	Yes	2.21868	3.38203
P18077	RPL35A	11	sp|P18077|RL35A_HUMAN 60S ribosomal protein L35a OS=Homo sapiens OX=9606 GN=RPL35A PE=1 SV=2	24.8575	24.7178	4	4	0.139707	0.139519	0.195377	0.354613	No	No	Yes	2.78956	0.995196
P18085	ARF4	9	sp|P18085|ARF4_HUMAN ADP-ribosylation factor 4 OS=Homo sapiens OX=9606 GN=ARF4 PE=1 SV=3	22.0769	21.9588	1	1	0.11813	0.117971	0.380896	0.542777	No	No	Yes	1.85433	3.29282
P18124	RPL7	22	sp|P18124|RL7_HUMAN 60S ribosomal protein L7 OS=Homo sapiens OX=9606 GN=RPL7 PE=1 SV=1	24.7717	24.5775	4	4	0.194128	0.193867	0.487417	0.632625	No	No	Yes	2.48612	2.46313
P18206	VCL	38	sp|P18206|VINC_HUMAN Vinculin OS=Homo sapiens OX=9606 GN=VCL PE=1 SV=4	20.1165	20.127	3	3	-0.0104719	-0.0104578	0.985331	0.991127	No	No	Yes	2.11525	2.7685
P18583	SON	35	sp|P18583|SON_HUMAN Protein SON OS=Homo sapiens OX=9606 GN=SON PE=1 SV=4	21.9769	20.9697	4	3	1.00723	1.00587	0.235816	0.397286	No	No	Yes	2.65447	2.97925
P18621	RPL17	13	sp|P18621|RL17_HUMAN 60S ribosomal protein L17 OS=Homo sapiens OX=9606 GN=RPL17 PE=1 SV=3	24.8246	23.9085	4	2	0.916053	0.914821	0.0214869	0.0628078	No	No	Yes	0.599494	0.926857
P18669	PGAM1	20	sp|P18669|PGAM1_HUMAN Phosphoglycerate mutase 1 OS=Homo sapiens OX=9606 GN=PGAM1 PE=1 SV=2	20.8057	22.3379	2	1	-1.53219	-1.53013	0.000639037	0.00228849	No	No	Yes	0.863624	2.6878
P18754	RCC1	21	sp|P18754|RCC1_HUMAN Regulator of chromosome condensation OS=Homo sapiens OX=9606 GN=RCC1 PE=1 SV=1	21.4018	18.702	1	0	2.69975	2.69612	0.000136418	0.00055213	No	No	Yes	1.75958	3.25717
P19338	NCL	45	sp|P19338|NUCL_HUMAN Nucleolin OS=Homo sapiens OX=9606 GN=NCL PE=1 SV=3	25.3984	24.6369	4	4	0.761409	0.760385	0.0293784	0.083354	No	No	Yes	3.00923	2.73206
P20042	EIF2S2	12	sp|P20042|IF2B_HUMAN Eukaryotic translation initiation factor 2 subunit 2 OS=Homo sapiens OX=9606 GN=EIF2S2 PE=1 SV=2	18.2304	21.8908	0	1	-3.66046	-3.65554	3.36891e-10	2.88042e-08	No	No	Yes	2.40177	2.86605
P20618	PSMB1	8	sp|P20618|PSB1_HUMAN Proteasome subunit beta type-1 OS=Homo sapiens OX=9606 GN=PSMB1 PE=1 SV=2	18.2381	21.7627	0	1	-3.52451	-3.51977	8.74387e-09	3.32267e-07	No	No	Yes	2.08373	3.2472
P20700	LMNB1	57	sp|P20700|LMNB1_HUMAN Lamin-B1 OS=Homo sapiens OX=9606 GN=LMNB1 PE=1 SV=2	26.1416	25.7786	4	4	0.362981	0.362493	0.332487	0.505368	No	No	Yes	2.14497	2.89463
P20933	AGA	1	sp|P20933|ASPG_HUMAN N(4)-(beta-N-acetylglucosaminyl)-L-asparaginase OS=Homo sapiens OX=9606 GN=AGA PE=1 SV=2	18.7712	18.6542	1	0	0.116981	0.116824	0.117866	0.256302	No	No	Yes	1.48562	3.15873
P21333	FLNA	135	sp|P21333|FLNA_HUMAN Filamin-A OS=Homo sapiens OX=9606 GN=FLNA PE=1 SV=4	20.0506	18.689	2	0	1.36152	1.35969	0.000500527	0.00182107	Yes	Yes	No		3.82515
P21741	MDK	1	sp|P21741|MK_HUMAN Midkine OS=Homo sapiens OX=9606 GN=MDK PE=1 SV=1	18.2448	20.593	0	1	-2.34818	-2.34502	1.84693e-06	2.00524e-05	No	No	Yes	1.8958	3.10186
P21796	VDAC1	23	sp|P21796|VDAC1_HUMAN Voltage-dependent anion-selective channel protein 1 OS=Homo sapiens OX=9606 GN=VDAC1 PE=1 SV=2	20.7841	20.2857	2	1	0.498401	0.497731	0.00489631	0.0161013	No	No	Yes	2.01369	2.41744
P21980	TGM2	20	sp|P21980|TGM2_HUMAN Protein-glutamine gamma-glutamyltransferase 2 OS=Homo sapiens OX=9606 GN=TGM2 PE=1 SV=2	18.2119	23.8018	0	1	-5.58994	-5.58242	2.61923e-06	2.42102e-05	No	No	Yes	0.122749	3.4822
P22087	FBL	19	sp|P22087|FBRL_HUMAN rRNA 2-O-methyltransferase fibrillarin OS=Homo sapiens OX=9606 GN=FBL PE=1 SV=2	24.5292	22.3599	4	3	2.16926	2.16634	0.165688	0.315683	No	No	Yes	2.49394	3.30914
P22234	PAICS	28	sp|P22234|PUR6_HUMAN Multifunctional protein ADE2 OS=Homo sapiens OX=9606 GN=PAICS PE=1 SV=3	22.0607	22.0153	4	2	0.0453249	0.0452639	0.86956	0.92953	No	No	Yes	2.26017	3.19632
P22314	UBA1	51	sp|P22314|UBA1_HUMAN Ubiquitin-like modifier-activating enzyme 1 OS=Homo sapiens OX=9606 GN=UBA1 PE=1 SV=3	22.5805	21.6926	4	4	0.887889	0.886695	0.133772	0.271514	No	No	Yes	2.26031	3.60723
P22392	NME2	7	sp|P22392|NDKB_HUMAN Nucleoside diphosphate kinase B OS=Homo sapiens OX=9606 GN=NME2 PE=1 SV=1;sp|O60361|NDK8_HUMAN Putative nucleoside diphosphate kinase OS=Homo sapiens OX=9606 GN=NME2P1 PE=5 SV=1	23.3771	22.1543	4	3	1.22281	1.22116	0.333454	0.505368	No	No	Yes	0.562622	2.88208
P22528	SPRR1B	4	sp|P22528|SPR1B_HUMAN Cornifin-B OS=Homo sapiens OX=9606 GN=SPRR1B PE=1 SV=2;sp|P35321|SPR1A_HUMAN Cornifin-A OS=Homo sapiens OX=9606 GN=SPRR1A PE=1 SV=2	18.2049	25.5542	0	1	-7.34931	-7.33943	4.84246e-07	6.92233e-06	No	No	No
P22531	SPRR2E	1	sp|P22531|SPR2E_HUMAN Small proline-rich protein 2E OS=Homo sapiens OX=9606 GN=SPRR2E PE=2 SV=2;sp|P35326|SPR2A_HUMAN Small proline-rich protein 2A OS=Homo sapiens OX=9606 GN=SPRR2A PE=1 SV=1	24.1093	26.7716	1	1	-2.66229	-2.65871	2.60903e-06	2.42102e-05	No	No	No
P22532	SPRR2D	1	sp|P22532|SPR2D_HUMAN Small proline-rich protein 2D OS=Homo sapiens OX=9606 GN=SPRR2D PE=2 SV=2	18.1931	20.747	0	1	-2.5539	-2.55046	6.41935e-05	0.000281464	No	No	No
P22626	HNRNPA2B1	33	sp|P22626|ROA2_HUMAN Heterogeneous nuclear ribonucleoproteins A2/B1 OS=Homo sapiens OX=9606 GN=HNRNPA2B1 PE=1 SV=2	26.1189	25.6532	4	4	0.465678	0.465052	0.1839	0.33905	No	No	Yes	2.78607	2.86736
P22735	TGM1	20	sp|P22735|TGM1_HUMAN Protein-glutamine gamma-glutamyltransferase K OS=Homo sapiens OX=9606 GN=TGM1 PE=1 SV=4	25.1997	25.4045	4	4	-0.204763	-0.204488	0.219923	0.380829	No	No	No		3.76073
P23246	SFPQ	45	sp|P23246|SFPQ_HUMAN Splicing factor, proline- and glutamine-rich OS=Homo sapiens OX=9606 GN=SFPQ PE=1 SV=2	27.6459	27.2239	4	4	0.421964	0.421397	0.180624	0.335726	No	No	Yes	2.59764	2.88362
P23284	PPIB	19	sp|P23284|PPIB_HUMAN Peptidyl-prolyl cis-trans isomerase B OS=Homo sapiens OX=9606 GN=PPIB PE=1 SV=2	22.5052	22.0975	4	1	0.407701	0.407152	0.121965	0.260701	No	No	Yes	1.8072	3.41451
P23396	RPS3	27	sp|P23396|RS3_HUMAN 40S ribosomal protein S3 OS=Homo sapiens OX=9606 GN=RPS3 PE=1 SV=2	26.489	26.0153	4	4	0.473712	0.473075	0.0143884	0.0445323	No	No	Yes	3.09879	2.81291
P23490	LOR	3	sp|P23490|LORI_HUMAN Loricrin OS=Homo sapiens OX=9606 GN=LORICRIN PE=1 SV=2	22.6151	22.6595	3	3	-0.0444495	-0.0443897	0.982486	0.989721	No	No	No
P23526	AHCY	18	sp|P23526|SAHH_HUMAN Adenosylhomocysteinase OS=Homo sapiens OX=9606 GN=AHCY PE=1 SV=4	23.5865	23.1595	4	4	0.427043	0.426469	0.20187	0.359771	No	No	Yes	1.99831	3.03922
P23743	DGKA	7	sp|P23743|DGKA_HUMAN Diacylglycerol kinase alpha OS=Homo sapiens OX=9606 GN=DGKA PE=1 SV=3	20.9114	18.6929	1	0	2.21851	2.21553	4.98919e-06	3.79178e-05	No	No	Yes	1.0005	3.2641
P24534	EEF1B2	9	sp|P24534|EF1B_HUMAN Elongation factor 1-beta OS=Homo sapiens OX=9606 GN=EEF1B2 PE=1 SV=3	21.6084	18.613	1	0	2.9954	2.99138	5.12424e-06	3.85163e-05	No	No	Yes	2.39122	1.40858
P25311	AZGP1	16	sp|P25311|ZA2G_HUMAN Zinc-alpha-2-glycoprotein OS=Homo sapiens OX=9606 GN=AZGP1 PE=1 SV=2	25.6969	25.83	4	4	-0.133095	-0.132916	0.631637	0.733514	No	No	No		3.23539
P25398	RPS12	9	sp|P25398|RS12_HUMAN 40S ribosomal protein S12 OS=Homo sapiens OX=9606 GN=RPS12 PE=1 SV=3	25.3304	25.0406	4	4	0.289805	0.289415	0.216177	0.377206	No	No	Yes	3.09714	2.401
P25705	ATP5A1	43	sp|P25705|ATPA_HUMAN ATP synthase subunit alpha, mitochondrial OS=Homo sapiens OX=9606 GN=ATP5F1A PE=1 SV=1	23.1702	22.9325	4	4	0.23775	0.23743	0.45165	0.602538	No	No	Yes	2.23003	3.49413
P25786	PSMA1	15	sp|P25786|PSA1_HUMAN Proteasome subunit alpha type-1 OS=Homo sapiens OX=9606 GN=PSMA1 PE=1 SV=1	22.4111	22.6498	4	2	-0.238717	-0.238396	0.152163	0.300008	No	No	Yes	2.0745	2.80477
P25788	PSMA3	8	sp|P25788|PSA3_HUMAN Proteasome subunit alpha type-3 OS=Homo sapiens OX=9606 GN=PSMA3 PE=1 SV=2	18.2556	22.941	0	1	-4.68538	-4.67908	7.48289e-09	3.32267e-07	No	No	Yes	1.86791	3.30315
P25789	PSMA4	12	sp|P25789|PSA4_HUMAN Proteasome subunit alpha type-4 OS=Homo sapiens OX=9606 GN=PSMA4 PE=1 SV=1	21.531	21.6087	3	2	-0.077683	-0.0775785	0.92987	0.955924	No	No	Yes	2.24949	2.94562
P26038	MSN	38	sp|P26038|MOES_HUMAN Moesin OS=Homo sapiens OX=9606 GN=MSN PE=1 SV=3	20.8501	18.5902	1	0	2.25988	2.25684	2.05377e-06	2.09668e-05	No	No	Yes	1.95281	3.23982
P26368	U2AF2	22	sp|P26368|U2AF2_HUMAN Splicing factor U2AF 65 kDa subunit OS=Homo sapiens OX=9606 GN=U2AF2 PE=1 SV=4	23.0794	21.6149	4	3	1.4645	1.46253	0.186523	0.342041	No	No	Yes	1.96689	2.62592
P26373	RPL13	14	sp|P26373|RL13_HUMAN 60S ribosomal protein L13 OS=Homo sapiens OX=9606 GN=RPL13 PE=1 SV=4	26.8509	26.2674	4	4	0.583456	0.582671	0.0671576	0.166434	No	No	Yes	2.92148	1.63438
P26447	S100A4	2	sp|P26447|S10A4_HUMAN Protein S100-A4 OS=Homo sapiens OX=9606 GN=S100A4 PE=1 SV=1	18.2638	21.2172	0	1	-2.9534	-2.94943	6.34089e-05	0.000279818	No	No	No
P26599	PTBP1	24	sp|P26599|PTBP1_HUMAN Polypyrimidine tract-binding protein 1 OS=Homo sapiens OX=9606 GN=PTBP1 PE=1 SV=1	22.2089	21.9886	2	1	0.220273	0.219977	0.450222	0.602538	No	No	Yes	2.18682	3.113
P26641	EEF1G	25	sp|P26641|EF1G_HUMAN Elongation factor 1-gamma OS=Homo sapiens OX=9606 GN=EEF1G PE=1 SV=3	23.7316	23.2469	4	4	0.484651	0.484	0.312735	0.486161	No	No	Yes	0.47674	3.4823
P27635	RPL10	16	sp|P27635|RL10_HUMAN 60S ribosomal protein L10 OS=Homo sapiens OX=9606 GN=RPL10 PE=1 SV=4	24.9902	22.8921	4	3	2.09804	2.09522	0.210323	0.369822	No	No	Yes	2.2896	1.55931
P27816	MAP4	39	sp|P27816|MAP4_HUMAN Microtubule-associated protein 4 OS=Homo sapiens OX=9606 GN=MAP4 PE=1 SV=3	22.3587	21.9463	2	3	0.412414	0.41186	0.711938	0.80171	No	No	Yes	1.92097	2.47815
P28066	PSMA5	6	sp|P28066|PSA5_HUMAN Proteasome subunit alpha type-5 OS=Homo sapiens OX=9606 GN=PSMA5 PE=1 SV=3	21.9727	18.6633	1	0	3.30941	3.30496	7.61077e-05	0.000327407	No	No	Yes	1.48915	2.79808
P28072	PSMB6	6	sp|P28072|PSB6_HUMAN Proteasome subunit beta type-6 OS=Homo sapiens OX=9606 GN=PSMB6 PE=1 SV=4	23.0604	23.2037	4	4	-0.143282	-0.143089	0.43284	0.583949	No	No	Yes	1.87264	2.77327
P28074	PSMB5	11	sp|P28074|PSB5_HUMAN Proteasome subunit beta type-5 OS=Homo sapiens OX=9606 GN=PSMB5 PE=1 SV=3	22.2533	22.4358	4	4	-0.182557	-0.182312	0.647541	0.74691	No	No	Yes	1.99482	2.54217
P29401	TKT	29	sp|P29401|TKT_HUMAN Transketolase OS=Homo sapiens OX=9606 GN=TKT PE=1 SV=3	21.3173	22.4849	3	4	-1.16759	-1.16602	0.330509	0.504616	No	No	Yes	2.65719	3.39525
P29508	SERPINB3	15	sp|P29508|SPB3_HUMAN Serpin B3 OS=Homo sapiens OX=9606 GN=SERPINB3 PE=1 SV=2	25.4415	26.0297	4	4	-0.588187	-0.587396	0.146188	0.293233	No	No	No		3.43438
P29692	EEF1D	13	sp|P29692|EF1D_HUMAN Elongation factor 1-delta OS=Homo sapiens OX=9606 GN=EEF1D PE=1 SV=5	21.5419	18.6561	1	0	2.88582	2.88194	1.83026e-07	3.4775e-06	No	No	Yes	2.216	2.08418
P30041	PRDX6	19	sp|P30041|PRDX6_HUMAN Peroxiredoxin-6 OS=Homo sapiens OX=9606 GN=PRDX6 PE=1 SV=3	20.0874	20.3026	3	3	-0.21518	-0.214891	0.787017	0.866661	No	No	Yes	2.11659	3.19594
P30050	RPL12	10	sp|P30050|RL12_HUMAN 60S ribosomal protein L12 OS=Homo sapiens OX=9606 GN=RPL12 PE=1 SV=1	25.6971	25.2323	4	4	0.464795	0.46417	0.022861	0.06654	No	No	Yes	2.59074	1.77757
P30086	PEBP1	9	sp|P30086|PEBP1_HUMAN Phosphatidylethanolamine-binding protein 1 OS=Homo sapiens OX=9606 GN=PEBP1 PE=1 SV=3	18.4434	20.9597	1	1	-2.51629	-2.51291	2.28581e-07	4.07939e-06	No	No	Yes	2.50544	3.09844
P30153	PPP2R1A	22	sp|P30153|2AAA_HUMAN Serine/threonine-protein phosphatase 2A 65 kDa regulatory subunit A alpha isoform OS=Homo sapiens OX=9606 GN=PPP2R1A PE=1 SV=4	21.2371	18.6158	2	0	2.62136	2.61783	2.96018e-05	0.000152238	Yes	Yes	Yes	1.30073	3.33037
P31025	LCN1	2	sp|P31025|LCN1_HUMAN Lipocalin-1 OS=Homo sapiens OX=9606 GN=LCN1 PE=1 SV=1;sp|Q5VSP4|LC1L1_HUMAN Putative lipocalin 1-like protein 1 OS=Homo sapiens OX=9606 GN=LCN1P1 PE=5 SV=1	23.3123	23.761	4	4	-0.448672	-0.448069	0.172804	0.327417	No	No	No		3.15947
P31151	S100A7	8	sp|P31151|S10A7_HUMAN Protein S100-A7 OS=Homo sapiens OX=9606 GN=S100A7 PE=1 SV=4	24.5352	24.7118	4	4	-0.176578	-0.17634	0.855352	0.920136	No	No	No		2.20262
P31327	CPS1	4	sp|P31327|CPSM_HUMAN Carbamoyl-phosphate synthase [ammonia], mitochondrial OS=Homo sapiens OX=9606 GN=CPS1 PE=1 SV=2	19.8465	20.0365	2	4	-0.190028	-0.189772	0.549932	0.676535	No	No	Yes	1.31906	3.47427
P31689	DNAJA1	17	sp|P31689|DNJA1_HUMAN DnaJ homolog subfamily A member 1 OS=Homo sapiens OX=9606 GN=DNAJA1 PE=1 SV=2	20.8095	21.1576	3	1	-0.348044	-0.347576	0.555728	0.681186	No	No	No		2.78224
P31942	HNRNPH3	15	sp|P31942|HNRH3_HUMAN Heterogeneous nuclear ribonucleoprotein H3 OS=Homo sapiens OX=9606 GN=HNRNPH3 PE=1 SV=2	22.3541	22.7068	2	1	-0.352669	-0.352195	0.0755842	0.181402	No	No	Yes	2.3267	2.24358
P31943	HNRNPH1	13	sp|P31943|HNRH1_HUMAN Heterogeneous nuclear ribonucleoprotein H OS=Homo sapiens OX=9606 GN=HNRNPH1 PE=1 SV=4	22.2686	22.3371	4	4	-0.0684991	-0.068407	0.801	0.87745	No	No	Yes	2.6611	2.15887
P31944	CASP14	12	sp|P31944|CASPE_HUMAN Caspase-14 OS=Homo sapiens OX=9606 GN=CASP14 PE=1 SV=2	25.3007	25.5028	4	4	-0.202115	-0.201843	0.272886	0.444415	No	No	No		3.22492
P31946	YWHAB	12	sp|P31946|1433B_HUMAN 14-3-3 protein beta/alpha OS=Homo sapiens OX=9606 GN=YWHAB PE=1 SV=3	18.2166	21.6734	0	2	-3.45683	-3.45218	4.98077e-05	0.000230192	Yes	Yes	Yes	2.64858	3.05211
P31947	SFN	17	sp|P31947|1433S_HUMAN 14-3-3 protein sigma OS=Homo sapiens OX=9606 GN=SFN PE=1 SV=1	22.3911	24.4311	2	2	-2.04	-2.03726	0.0148476	0.0453381	Yes	Yes	Yes	0.49221	2.61642
P31949	S100A11	6	sp|P31949|S10AB_HUMAN Protein S100-A11 OS=Homo sapiens OX=9606 GN=S100A11 PE=1 SV=2	21.2377	22.3328	3	1	-1.09511	-1.09364	0.195722	0.354613	No	No	Yes	1.57994	2.75675
P32119	PRDX2	17	sp|P32119|PRDX2_HUMAN Peroxiredoxin-2 OS=Homo sapiens OX=9606 GN=PRDX2 PE=1 SV=5	25.1657	25.292	4	4	-0.126285	-0.126115	0.226033	0.388459	No	No	Yes	1.47763	3.02912
P32969	RPL9	12	sp|P32969|RL9_HUMAN 60S ribosomal protein L9 OS=Homo sapiens OX=9606 GN=RPL9 PE=1 SV=1	24.0594	23.7845	4	2	0.274894	0.274524	0.541045	0.669527	No	No	Yes	2.60273	2.03619
P34096	RNASE4	2	sp|P34096|RNAS4_HUMAN Ribonuclease 4 OS=Homo sapiens OX=9606 GN=RNASE4 PE=1 SV=3	18.2993	20.0662	0	1	-1.7669	-1.76453	4.97265e-05	0.000230192	No	No	No
P34897	SHMT2	36	sp|P34897|GLYM_HUMAN Serine hydroxymethyltransferase, mitochondrial OS=Homo sapiens OX=9606 GN=SHMT2 PE=1 SV=3	22.733	23.1496	4	4	-0.416571	-0.416011	0.392358	0.548155	No	No	Yes	1.80679	3.34872
P35232	PHB	25	sp|P35232|PHB_HUMAN Prohibitin OS=Homo sapiens OX=9606 GN=PHB PE=1 SV=1	20.1408	18.6638	1	0	1.47695	1.47496	4.33299e-06	3.48679e-05	No	No	Yes	1.65887	2.85956
P35268	RPL22	6	sp|P35268|RL22_HUMAN 60S ribosomal protein L22 OS=Homo sapiens OX=9606 GN=RPL22 PE=1 SV=2	24.7982	24.6409	4	4	0.157303	0.157092	0.281404	0.453963	No	No	Yes	2.26407	1.91174
P35325	SPRR2B	0	sp|P35325|SPR2B_HUMAN Small proline-rich protein 2B OS=Homo sapiens OX=9606 GN=SPRR2B PE=2 SV=1	18.2758	22.3673	0	1	-4.09147	-4.08597	2.00589e-05	0.000111547	No	No	No
P35579	MYH9	119	sp|P35579|MYH9_HUMAN Myosin-9 OS=Homo sapiens OX=9606 GN=MYH9 PE=1 SV=4	23.3401	22.6445	4	4	0.69558	0.694645	0.369375	0.5319	No	No	Yes	1.8373	3.55264
P35625	TIMP3	7	sp|P35625|TIMP3_HUMAN Metalloproteinase inhibitor 3 OS=Homo sapiens OX=9606 GN=TIMP3 PE=1 SV=2	19.2461	18.6809	1	0	0.565203	0.564443	0.000948387	0.00329288	No	No	No		3.03995
P35637	FUS	11	sp|P35637|FUS_HUMAN RNA-binding protein FUS OS=Homo sapiens OX=9606 GN=FUS PE=1 SV=1	24.0594	23.4722	4	4	0.587234	0.586444	0.237646	0.397707	No	No	Yes	2.46907	1.6902
P35659	DEK	18	sp|P35659|DEK_HUMAN Protein DEK OS=Homo sapiens OX=9606 GN=DEK PE=1 SV=1	21.2074	21.1542	3	2	0.0532065	0.0531349	0.943665	0.966268	No	No	Yes	2.85859	1.62972
P36578	RPL4	29	sp|P36578|RL4_HUMAN 60S ribosomal protein L4 OS=Homo sapiens OX=9606 GN=RPL4 PE=1 SV=5	23.9539	23.964	4	4	-0.0101271	-0.0101135	0.972643	0.988541	No	No	Yes	2.66687	2.8683
P36776	LONP1	41	sp|P36776|LONM_HUMAN Lon protease homolog, mitochondrial OS=Homo sapiens OX=9606 GN=LONP1 PE=1 SV=2	19.4038	18.652	1	0	0.751784	0.750773	0.000927476	0.0032533	No	No	Yes	1.4134	3.49953
P36952	SERPINB5	8	sp|P36952|SPB5_HUMAN Serpin B5 OS=Homo sapiens OX=9606 GN=SERPINB5 PE=1 SV=2	21.4871	22.0234	1	1	-0.536212	-0.535491	0.00316797	0.0106743	No	No	No
P37108	SRP14	7	sp|P37108|SRP14_HUMAN Signal recognition particle 14 kDa protein OS=Homo sapiens OX=9606 GN=SRP14 PE=1 SV=2	23.1218	18.6903	1	0	4.43141	4.42545	2.38016e-06	2.32576e-05	No	No	Yes	2.59168	2.07791
P37802	TAGLN2	21	sp|P37802|TAGL2_HUMAN Transgelin-2 OS=Homo sapiens OX=9606 GN=TAGLN2 PE=1 SV=3	18.2332	20.6394	0	3	-2.40624	-2.403	0.0480569	0.122653	No	No	Yes	2.23034	2.55873
P37837	TALDO1	14	sp|P37837|TALDO_HUMAN Transaldolase OS=Homo sapiens OX=9606 GN=TALDO1 PE=1 SV=2	20.2524	20.6056	4	1	-0.353202	-0.352727	0.119962	0.258032	No	No	Yes	1.60002	3.21599
P38117	ETFB	21	sp|P38117|ETFB_HUMAN Electron transfer flavoprotein subunit beta OS=Homo sapiens OX=9606 GN=ETFB PE=1 SV=3	22.4394	21.6085	2	3	0.830845	0.829727	0.404326	0.560972	No	No	Yes	1.38715	2.7296
P38159	RBMX	10	sp|P38159|RBMX_HUMAN RNA-binding motif protein, X chromosome OS=Homo sapiens OX=9606 GN=RBMX PE=1 SV=3	26.1264	25.0112	4	4	1.11519	1.11369	0.013306	0.0415586	Yes	Yes	Yes	2.43898	2.84496
P38646	HSPA9	55	sp|P38646|GRP75_HUMAN Stress-70 protein, mitochondrial OS=Homo sapiens OX=9606 GN=HSPA9 PE=1 SV=2	25.3028	25.5169	4	4	-0.21412	-0.213832	0.198273	0.356591	No	No	Yes	2.13444	3.1329
P38919	EIF4A3	28	sp|P38919|IF4A3_HUMAN Eukaryotic initiation factor 4A-III OS=Homo sapiens OX=9606 GN=EIF4A3 PE=1 SV=4	23.6457	22.6565	4	4	0.989214	0.987884	0.131262	0.270262	No	No	Yes	2.17018	3.32368
P39019	RPS19	12	sp|P39019|RS19_HUMAN 40S ribosomal protein S19 OS=Homo sapiens OX=9606 GN=RPS19 PE=1 SV=2	25.2933	24.7082	4	4	0.585093	0.584306	0.103623	0.233921	No	No	Yes	2.98478	1.4685
P39023	RPL3	27	sp|P39023|RL3_HUMAN 60S ribosomal protein L3 OS=Homo sapiens OX=9606 GN=RPL3 PE=1 SV=2	22.0916	22.2042	3	4	-0.112624	-0.112473	0.917517	0.950545	No	No	Yes	2.35695	3.01864
P39748	FEN1	17	sp|P39748|FEN1_HUMAN Flap endonuclease 1 OS=Homo sapiens OX=9606 GN=FEN1 PE=1 SV=1	21.9038	18.6662	1	0	3.23759	3.23323	5.51711e-05	0.000249914	No	No	Yes	1.87673	2.94795
P40227	CCT6A	24	sp|P40227|TCPZ_HUMAN T-complex protein 1 subunit zeta OS=Homo sapiens OX=9606 GN=CCT6A PE=1 SV=3	21.8216	18.6523	3	0	3.16925	3.16499	0.0351643	0.0950687	No	No	Yes	2.41437	3.22397
P40429	RPL13A	9	sp|P40429|RL13A_HUMAN 60S ribosomal protein L13a OS=Homo sapiens OX=9606 GN=RPL13A PE=1 SV=2	23.3837	23.5238	4	4	-0.140164	-0.139976	0.423247	0.578676	No	No	Yes	2.94352	2.36036
P40926	MDH2	21	sp|P40926|MDHM_HUMAN Malate dehydrogenase, mitochondrial OS=Homo sapiens OX=9606 GN=MDH2 PE=1 SV=3	23.1422	22.6674	4	4	0.474753	0.474115	0.149706	0.297671	No	No	Yes	2.10524	3.23769
P40939	HADHA	51	sp|P40939|ECHA_HUMAN Trifunctional enzyme subunit alpha, mitochondrial OS=Homo sapiens OX=9606 GN=HADHA PE=1 SV=2	22.7673	22.412	4	2	0.355321	0.354843	0.170027	0.323052	No	No	Yes	2.12917	3.14823
P41091	EIF2S3	19	sp|P41091|IF2G_HUMAN Eukaryotic translation initiation factor 2 subunit 3 OS=Homo sapiens OX=9606 GN=EIF2S3 PE=1 SV=3;sp|Q2VIR3|IF2GL_HUMAN Eukaryotic translation initiation factor 2 subunit 3B OS=Homo sapiens OX=9606 GN=EIF2S3B PE=2 SV=2	21.8499	21.4963	4	3	0.353623	0.353147	0.710404	0.80171	No	No	Yes	2.37872	3.27867
P41252	IARS	40	sp|P41252|SYIC_HUMAN Isoleucine--tRNA ligase, cytoplasmic OS=Homo sapiens OX=9606 GN=IARS1 PE=1 SV=2	21.5207	20.6302	3	3	0.890497	0.8893	0.416541	0.57157	No	No	Yes	2.06681	3.92281
P42167	TMPO	14	sp|P42167|LAP2B_HUMAN Lamina-associated polypeptide 2, isoforms beta/gamma OS=Homo sapiens OX=9606 GN=TMPO PE=1 SV=2	20.3508	18.6595	2	0	1.69135	1.68908	0.00933786	0.0298463	Yes	Yes	Yes	2.10043	3.32661
P42285	SKIV2L2	26	sp|P42285|MTREX_HUMAN Exosome RNA helicase MTR4 OS=Homo sapiens OX=9606 GN=MTREX PE=1 SV=3	18.6738	18.6348	1	0	0.0390102	0.0389578	0.675776	0.77167	No	No	Yes	1.95086	3.7703
P42357	HAL	13	sp|P42357|HUTH_HUMAN Histidine ammonia-lyase OS=Homo sapiens OX=9606 GN=HAL PE=1 SV=1	22.3477	23.1486	4	4	-0.800919	-0.799842	0.0798584	0.189664	No	No	No		3.16647
P42677	RPS27	3	sp|P42677|RS27_HUMAN 40S ribosomal protein S27 OS=Homo sapiens OX=9606 GN=RPS27 PE=1 SV=3	24.4034	24.3846	4	4	0.0188569	0.0188315	0.887218	0.934009	No	No	Yes	2.17324	2.81061
P42704	LRPPRC	95	sp|P42704|LPPRC_HUMAN Leucine-rich PPR motif-containing protein, mitochondrial OS=Homo sapiens OX=9606 GN=LRPPRC PE=1 SV=3	21.7626	21.0819	2	4	0.680757	0.679842	0.253901	0.419488	No	No	Yes	2.15875	3.8454
P43243	MATR3	47	sp|P43243|MATR3_HUMAN Matrin-3 OS=Homo sapiens OX=9606 GN=MATR3 PE=1 SV=2	23.4119	23.0295	4	4	0.382357	0.381843	0.23781	0.397707	No	No	Yes	2.42541	2.38833
P45880	VDAC2	18	sp|P45880|VDAC2_HUMAN Voltage-dependent anion-selective channel protein 2 OS=Homo sapiens OX=9606 GN=VDAC2 PE=1 SV=2	21.5964	21.2899	3	3	0.306547	0.306135	0.791609	0.869118	No	No	Yes	2.04154	2.36988
P45973	CBX5	9	sp|P45973|CBX5_HUMAN Chromobox protein homolog 5 OS=Homo sapiens OX=9606 GN=CBX5 PE=1 SV=1	22.4255	21.6265	2	3	0.799097	0.798023	0.425827	0.579511	No	No	Yes	2.42394	2.90921
P46013	MKI67	90	sp|P46013|KI67_HUMAN Proliferation marker protein Ki-67 OS=Homo sapiens OX=9606 GN=MKI67 PE=1 SV=2	20.7664	20.2922	3	1	0.474259	0.473621	0.607117	0.718236	No	No	Yes	2.54526	3.3905
P46060	RANGAP1	26	sp|P46060|RAGP1_HUMAN Ran GTPase-activating protein 1 OS=Homo sapiens OX=9606 GN=RANGAP1 PE=1 SV=1	21.2069	20.5788	2	1	0.628049	0.627204	0.129877	0.268978	No	No	Yes	1.71708	3.16328
P46087	NOP2	31	sp|P46087|NOP2_HUMAN Probable 28S rRNA (cytosine(4447)-C(5))-methyltransferase OS=Homo sapiens OX=9606 GN=NOP2 PE=1 SV=2	22.074	21.1661	3	2	0.907909	0.906688	0.392684	0.548155	No	No	Yes	1.20519	3.12556
P46776	RPL27A	9	sp|P46776|RL27A_HUMAN 60S ribosomal protein L27a OS=Homo sapiens OX=9606 GN=RPL27A PE=1 SV=2	25.1352	24.7611	4	4	0.374042	0.373539	0.124063	0.262981	No	No	Yes	3.29702	2.51586
P46777	RPL5	16	sp|P46777|RL5_HUMAN 60S ribosomal protein L5 OS=Homo sapiens OX=9606 GN=RPL5 PE=1 SV=3	24.7722	23.7088	4	2	1.06344	1.06201	0.0711757	0.174495	No	No	Yes	3.17419	2.35436
P46778	RPL21	6	sp|P46778|RL21_HUMAN 60S ribosomal protein L21 OS=Homo sapiens OX=9606 GN=RPL21 PE=1 SV=2	24.3745	24.1792	4	4	0.195235	0.194972	0.662412	0.760218	No	No	Yes	2.3239	2.40983
P46779	RPL28	13	sp|P46779|RL28_HUMAN 60S ribosomal protein L28 OS=Homo sapiens OX=9606 GN=RPL28 PE=1 SV=3	25.1107	24.6252	4	4	0.485451	0.484798	0.226606	0.388467	No	No	Yes	2.15241	2.69822
P46781	RPS9	18	sp|P46781|RS9_HUMAN 40S ribosomal protein S9 OS=Homo sapiens OX=9606 GN=RPS9 PE=1 SV=3	25.2252	24.3534	4	4	0.871858	0.870686	0.154191	0.302197	No	No	Yes	2.3288	1.87547
P46782	RPS5	16	sp|P46782|RS5_HUMAN 40S ribosomal protein S5 OS=Homo sapiens OX=9606 GN=RPS5 PE=1 SV=4	23.1535	22.8069	4	4	0.346535	0.346069	0.608519	0.718236	No	No	Yes	2.54463	3.03631
P46783	RPS10	9	sp|P46783|RS10_HUMAN 40S ribosomal protein S10 OS=Homo sapiens OX=9606 GN=RPS10 PE=1 SV=1	22.9666	23.8609	3	1	-0.894371	-0.893169	0.525228	0.659812	No	No	Yes	2.44294	2.94824
P47813	EIF1AX	6	sp|P47813|IF1AX_HUMAN Eukaryotic translation initiation factor 1A, X-chromosomal OS=Homo sapiens OX=9606 GN=EIF1AX PE=1 SV=2;sp|O14602|IF1AY_HUMAN Eukaryotic translation initiation factor 1A, Y-chromosomal OS=Homo sapiens OX=9606 GN=EIF1AY PE=1 SV=4	21.8401	18.6635	1	0	3.1766	3.17232	1.50377e-05	8.86704e-05	No	No	Yes	2.23902	2.69585
P47897	QARS	36	sp|P47897|SYQ_HUMAN Glutamine--tRNA ligase OS=Homo sapiens OX=9606 GN=QARS1 PE=1 SV=1	20.3018	18.6788	1	0	1.62296	1.62078	0.000217442	0.000849886	No	No	Yes	1.95714	3.45137
P47914	RPL29	5	sp|P47914|RL29_HUMAN 60S ribosomal protein L29 OS=Homo sapiens OX=9606 GN=RPL29 PE=1 SV=2	22.9807	22.9697	2	4	0.0110303	0.0110155	0.937268	0.961156	No	No	Yes	2.16986	2.01799
P47929	LGALS7	14	sp|P47929|LEG7_HUMAN Galectin-7 OS=Homo sapiens OX=9606 GN=LGALS7 PE=1 SV=2	24.147	24.8362	4	4	-0.689127	-0.6882	0.38457	0.543483	No	No	No		2.40193
P48594	SERPINB4	11	sp|P48594|SPB4_HUMAN Serpin B4 OS=Homo sapiens OX=9606 GN=SERPINB4 PE=1 SV=2	18.259	23.5038	0	1	-5.24484	-5.23779	2.32597e-07	4.07939e-06	No	No	No		3.48088
P48643	CCT5	35	sp|P48643|TCPE_HUMAN T-complex protein 1 subunit epsilon OS=Homo sapiens OX=9606 GN=CCT5 PE=1 SV=1	22.479	18.6565	2	0	3.82245	3.81731	2.91928e-05	0.000152238	Yes	Yes	Yes	2.43472	3.25968
P48681	NES	74	sp|P48681|NEST_HUMAN Nestin OS=Homo sapiens OX=9606 GN=NES PE=1 SV=2	18.2605	22.1973	0	1	-3.93683	-3.93153	6.26905e-10	4.42854e-08	No	No	Yes	0.777286	2.31277
P48730	CSNK1D	3	sp|P48730|KC1D_HUMAN Casein kinase I isoform delta OS=Homo sapiens OX=9606 GN=CSNK1D PE=1 SV=2	21.3367	18.6586	2	0	2.67814	2.67454	3.6846e-05	0.000180019	Yes	Yes	Yes	1.6751	3.24224
P49207	RPL34	9	sp|P49207|RL34_HUMAN 60S ribosomal protein L34 OS=Homo sapiens OX=9606 GN=RPL34 PE=1 SV=3	26.8152	26.4771	4	4	0.338065	0.33761	0.327645	0.502072	No	No	Yes	2.86056	2.50954
P49327	FASN	114	sp|P49327|FAS_HUMAN Fatty acid synthase OS=Homo sapiens OX=9606 GN=FASN PE=1 SV=3	24.4773	23.9076	4	4	0.569712	0.568946	0.482942	0.630405	No	No	Yes	1.97744	4.08916
P49368	CCT3	35	sp|P49368|TCPG_HUMAN T-complex protein 1 subunit gamma OS=Homo sapiens OX=9606 GN=CCT3 PE=1 SV=4	22.6994	22.2821	4	4	0.417374	0.416813	0.328108	0.502072	No	No	Yes	2.47989	3.11863
P49411	TUFM	36	sp|P49411|EFTU_HUMAN Elongation factor Tu, mitochondrial OS=Homo sapiens OX=9606 GN=TUFM PE=1 SV=2	24.158	24.0694	4	4	0.0886464	0.0885272	0.342124	0.513185	No	No	Yes	2.05091	3.23148
P49458	SRP9	5	sp|P49458|SRP09_HUMAN Signal recognition particle 9 kDa protein OS=Homo sapiens OX=9606 GN=SRP9 PE=1 SV=2	21.8425	22.0983	1	1	-0.255817	-0.255473	0.0734896	0.178251	No	No	Yes	2.15222	2.68867
P49756	RBM25	27	sp|P49756|RBM25_HUMAN RNA-binding protein 25 OS=Homo sapiens OX=9606 GN=RBM25 PE=1 SV=3	21.2737	18.6622	3	0	2.61155	2.60804	0.0323418	0.0892009	No	No	Yes	2.63923	2.99475
P50213	IDH3A	17	sp|P50213|IDH3A_HUMAN Isocitrate dehydrogenase [NAD] subunit alpha, mitochondrial OS=Homo sapiens OX=9606 GN=IDH3A PE=1 SV=1	20.6963	21.6098	3	4	-0.913553	-0.912324	0.325765	0.501854	No	No	Yes	1.57804	2.97878
P50395	GDI2	14	sp|P50395|GDIB_HUMAN Rab GDP dissociation inhibitor beta OS=Homo sapiens OX=9606 GN=GDI2 PE=1 SV=2	20.459	21.0197	1	2	-0.560699	-0.559945	0.0155438	0.0470442	No	No	Yes	2.02227	3.44161
P50402	EMD	15	sp|P50402|EMD_HUMAN Emerin OS=Homo sapiens OX=9606 GN=EMD PE=1 SV=1	22.714	21.569	4	3	1.14496	1.14342	0.30891	0.482407	No	No	Yes	1.84662	3.18206
P50502	ST13	4	sp|P50502|F10A1_HUMAN Hsc70-interacting protein OS=Homo sapiens OX=9606 GN=ST13 PE=1 SV=2;sp|Q8IZP2|ST134_HUMAN Putative protein FAM10A4 OS=Homo sapiens OX=9606 GN=ST13P4 PE=5 SV=1	21.3959	18.6825	1	0	2.71336	2.70971	4.97622e-06	3.79178e-05	No	No	Yes	2.27242	2.31691
P50570	DNM2	8	sp|P50570|DYN2_HUMAN Dynamin-2 OS=Homo sapiens OX=9606 GN=DNM2 PE=1 SV=2	18.1769	20.7962	0	1	-2.61923	-2.61571	4.83007e-08	1.17992e-06	No	No	Yes	1.47065	3.63749
P50914	RPL14	6	sp|P50914|RL14_HUMAN 60S ribosomal protein L14 OS=Homo sapiens OX=9606 GN=RPL14 PE=1 SV=4	22.3105	22.6249	3	1	-0.314467	-0.314044	0.788104	0.866661	No	No	Yes	2.67886	2.7794
P50990	CCT8	43	sp|P50990|TCPQ_HUMAN T-complex protein 1 subunit theta OS=Homo sapiens OX=9606 GN=CCT8 PE=1 SV=4	24.4801	23.9882	4	4	0.491901	0.49124	0.142434	0.287389	No	No	Yes	2.32376	3.28215
P50991	CCT4	32	sp|P50991|TCPD_HUMAN T-complex protein 1 subunit delta OS=Homo sapiens OX=9606 GN=CCT4 PE=1 SV=4	22.9946	22.6346	4	2	0.360058	0.359574	0.416978	0.57157	No	No	Yes	2.29646	3.3232
P51114	FXR1	21	sp|P51114|FXR1_HUMAN Fragile X mental retardation syndrome-related protein 1 OS=Homo sapiens OX=9606 GN=FXR1 PE=1 SV=3	21.9587	18.598	1	0	3.36072	3.3562	7.84481e-06	5.38249e-05	No	No	Yes	2.12951	2.9799
P51148	RAB5C	7	sp|P51148|RAB5C_HUMAN Ras-related protein Rab-5C OS=Homo sapiens OX=9606 GN=RAB5C PE=1 SV=2	20.6902	18.648	3	0	2.04219	2.03944	0.0257211	0.0736118	No	No	Yes	1.5881	3.19601
P51149	RAB7A	14	sp|P51149|RAB7A_HUMAN Ras-related protein Rab-7a OS=Homo sapiens OX=9606 GN=RAB7A PE=1 SV=1	21.7235	21.83	4	1	-0.106522	-0.106379	0.61676	0.721523	No	No	Yes	1.86322	2.89663
P51659	HSD17B4	37	sp|P51659|DHB4_HUMAN Peroxisomal multifunctional enzyme type 2 OS=Homo sapiens OX=9606 GN=HSD17B4 PE=1 SV=3	21.0021	20.641	2	3	0.361153	0.360667	0.614009	0.721114	No	No	Yes	1.87009	3.52318
P51955	NEK2	1	sp|P51955|NEK2_HUMAN Serine/threonine-protein kinase Nek2 OS=Homo sapiens OX=9606 GN=NEK2 PE=1 SV=1	19.7936	18.6606	1	0	1.13304	1.13152	6.47448e-10	4.42854e-08	No	No	Yes	1.75209
P51991	HNRNPA3	31	sp|P51991|ROA3_HUMAN Heterogeneous nuclear ribonucleoprotein A3 OS=Homo sapiens OX=9606 GN=HNRNPA3 PE=1 SV=2	22.2494	22.378	3	2	-0.128581	-0.128409	0.907518	0.944597	No	No	Yes	2.27417	2.95873
P52272	HNRNPM	48	sp|P52272|HNRPM_HUMAN Heterogeneous nuclear ribonucleoprotein M OS=Homo sapiens OX=9606 GN=HNRNPM PE=1 SV=3	25.9523	25.6567	4	4	0.295665	0.295268	0.202807	0.359771	No	No	Yes	2.4879	3.02742
P52597	HNRNPF	19	sp|P52597|HNRPF_HUMAN Heterogeneous nuclear ribonucleoprotein F OS=Homo sapiens OX=9606 GN=HNRNPF PE=1 SV=3	22.1629	23.0563	3	4	-0.893416	-0.892214	0.441653	0.593498	No	No	Yes	2.30677	2.29321
P52948	NUP98	36	sp|P52948|NUP98_HUMAN Nuclear pore complex protein Nup98-Nup96 OS=Homo sapiens OX=9606 GN=NUP98 PE=1 SV=4	20.6201	18.6234	1	0	1.99673	1.99404	1.68201e-05	9.58746e-05	No	No	Yes	1.44668	3.54116
P53007	SLC25A1	14	sp|P53007|TXTP_HUMAN Tricarboxylate transport protein, mitochondrial OS=Homo sapiens OX=9606 GN=SLC25A1 PE=1 SV=2	21.7221	21.9456	3	1	-0.223454	-0.223154	0.816319	0.887699	No	No	Yes	1.53053	3.3391
P53350	PLK1	19	sp|P53350|PLK1_HUMAN Serine/threonine-protein kinase PLK1 OS=Homo sapiens OX=9606 GN=PLK1 PE=1 SV=1	22.0461	22.2696	2	1	-0.223449	-0.223149	0.126127	0.264635	No	No	Yes	1.75285	3.40415
P53999	SUB1	9	sp|P53999|TCP4_HUMAN Activated RNA polymerase II transcriptional coactivator p15 OS=Homo sapiens OX=9606 GN=SUB1 PE=1 SV=3	21.322	21.4358	3	3	-0.113802	-0.113649	0.926771	0.954685	No	No	Yes	2.04669	0.825426
P54136	RARS	33	sp|P54136|SYRC_HUMAN Arginine--tRNA ligase, cytoplasmic OS=Homo sapiens OX=9606 GN=RARS1 PE=1 SV=2	21.3071	20.632	3	3	0.675174	0.674266	0.49682	0.636274	No	No	Yes	2.16462	3.40214
P54886	ALDH18A1	42	sp|P54886|P5CS_HUMAN Delta-1-pyrroline-5-carboxylate synthase OS=Homo sapiens OX=9606 GN=ALDH18A1 PE=1 SV=2	23.0361	23.3089	4	4	-0.272807	-0.27244	0.617092	0.721523	No	No	Yes	1.71815	3.38498
P55000	SLURP1	1	sp|P55000|SLUR1_HUMAN Secreted Ly-6/uPAR-related protein 1 OS=Homo sapiens OX=9606 GN=SLURP1 PE=1 SV=2	18.3396	18.6336	1	0	-0.293984	-0.293589	0.0206614	0.0609155	No	No	No
P55060	CSE1L	35	sp|P55060|XPO2_HUMAN Exportin-2 OS=Homo sapiens OX=9606 GN=CSE1L PE=1 SV=3	22.4238	27.6107	3	1	-5.18698	-5.18	0.0171618	0.0514855	No	No	Yes	2.10293	3.89918
P55072	VCP	58	sp|P55072|TERA_HUMAN Transitional endoplasmic reticulum ATPase OS=Homo sapiens OX=9606 GN=VCP PE=1 SV=4	21.8663	21.2643	1	2	0.601964	0.601154	0.303468	0.479381	No	No	Yes	2.03645	3.40884
P55084	HADHB	33	sp|P55084|ECHB_HUMAN Trifunctional enzyme subunit beta, mitochondrial OS=Homo sapiens OX=9606 GN=HADHB PE=1 SV=3	20.9076	21.4938	3	4	-0.586226	-0.585437	0.430662	0.583949	No	No	Yes	1.73614	3.14006
P55769	NHP2L1	10	sp|P55769|NH2L1_HUMAN NHP2-like protein 1 OS=Homo sapiens OX=9606 GN=SNU13 PE=1 SV=3	24.0766	23.2165	4	4	0.860123	0.858966	0.0920719	0.210626	No	No	No		2.57506
P55884	EIF3B	29	sp|P55884|EIF3B_HUMAN Eukaryotic translation initiation factor 3 subunit B OS=Homo sapiens OX=9606 GN=EIF3B PE=1 SV=3	21.6684	20.2419	4	1	1.42645	1.42453	0.0123458	0.0387364	Yes	Yes	Yes	1.75858	3.59827
P56192	MARS	24	sp|P56192|SYMC_HUMAN Methionine--tRNA ligase, cytoplasmic OS=Homo sapiens OX=9606 GN=MARS1 PE=1 SV=2	21.1447	18.6125	3	0	2.53221	2.5288	0.0306085	0.0854539	No	No	Yes	2.05115	3.72188
P59998	ARPC4	7	sp|P59998|ARPC4_HUMAN Actin-related protein 2/3 complex subunit 4 OS=Homo sapiens OX=9606 GN=ARPC4 PE=1 SV=3	20.9808	21.8428	2	1	-0.862014	-0.860855	0.000763834	0.00270706	No	No	Yes	1.4639	2.65549
P60174	TPI1	21	sp|P60174|TPIS_HUMAN Triosephosphate isomerase OS=Homo sapiens OX=9606 GN=TPI1 PE=1 SV=3	23.5295	23.4119	4	4	0.117617	0.117459	0.821699	0.891083	No	No	Yes	2.1486	3.03078
P60228	EIF3E	22	sp|P60228|EIF3E_HUMAN Eukaryotic translation initiation factor 3 subunit E OS=Homo sapiens OX=9606 GN=EIF3E PE=1 SV=1	21.4286	21.3974	3	1	0.031153	0.0311111	0.969257	0.986565	No	No	Yes	2.16201	3.36927
P60842	EIF4A1	22	sp|P60842|IF4A1_HUMAN Eukaryotic initiation factor 4A-I OS=Homo sapiens OX=9606 GN=EIF4A1 PE=1 SV=1	25.306	24.9609	4	4	0.345113	0.344649	0.0466739	0.119569	No	No	Yes	1.05683	3.4072
P60866	RPS20	7	sp|P60866|RS20_HUMAN 40S ribosomal protein S20 OS=Homo sapiens OX=9606 GN=RPS20 PE=1 SV=1	25.9002	25.367	4	4	0.533109	0.532392	0.0289199	0.0824218	No	No	Yes	2.48065	1.15168
P60900	PSMA6	11	sp|P60900|PSA6_HUMAN Proteasome subunit alpha type-6 OS=Homo sapiens OX=9606 GN=PSMA6 PE=1 SV=1	22.0744	21.3014	4	3	0.773005	0.771965	0.407973	0.563504	No	No	Yes	0.534672	2.98188
P60981	DSTN	5	sp|P60981|DEST_HUMAN Destrin OS=Homo sapiens OX=9606 GN=DSTN PE=1 SV=3	20.1777	20.9715	1	1	-0.793818	-0.79275	0.00133748	0.00459717	No	No	Yes	2.0537	3.1128
P61081	UBE2M	9	sp|P61081|UBC12_HUMAN NEDD8-conjugating enzyme Ubc12 OS=Homo sapiens OX=9606 GN=UBE2M PE=1 SV=1	22.2339	18.6434	1	0	3.59058	3.58575	1.71873e-05	9.71579e-05	No	No	Yes	1.48523	3.23804
P61224	RAP1B	5	sp|P61224|RAP1B_HUMAN Ras-related protein Rap-1b OS=Homo sapiens OX=9606 GN=RAP1B PE=1 SV=1;sp|A6NIZ1|RP1BL_HUMAN Ras-related protein Rap-1b-like protein OS=Homo sapiens OX=9606 PE=2 SV=1	23.604	23.5608	4	4	0.0431584	0.0431003	0.880465	0.934009	No	No	Yes	1.53427	3.20371
P61247	RPS3A	19	sp|P61247|RS3A_HUMAN 40S ribosomal protein S3a OS=Homo sapiens OX=9606 GN=RPS3A PE=1 SV=2	26.4224	24.8084	4	4	1.61405	1.61188	0.165538	0.315683	No	No	Yes	2.26883	1.58456
P61313	RPL15	13	sp|P61313|RL15_HUMAN 60S ribosomal protein L15 OS=Homo sapiens OX=9606 GN=RPL15 PE=1 SV=2	26.7632	26.7	4	4	0.0631432	0.0630583	0.715375	0.802159	No	No	Yes	3.10709	2.94082
P61353	RPL27	10	sp|P61353|RL27_HUMAN 60S ribosomal protein L27 OS=Homo sapiens OX=9606 GN=RPL27 PE=1 SV=2	25.5855	25.2666	4	4	0.318979	0.31855	0.454654	0.603852	No	No	Yes	2.86622	2.7622
P61513	RPL37A	4	sp|P61513|RL37A_HUMAN 60S ribosomal protein L37a OS=Homo sapiens OX=9606 GN=RPL37A PE=1 SV=2	22.0687	23.0906	3	2	-1.02187	-1.0205	0.343031	0.513421	No	No	Yes	3.17748	0.680336
P61604	HSPE1	20	sp|P61604|CH10_HUMAN 10 kDa heat shock protein, mitochondrial OS=Homo sapiens OX=9606 GN=HSPE1 PE=1 SV=2	21.801	18.6297	1	0	3.17127	3.167	4.85778e-07	6.92233e-06	No	No	Yes	1.9265	2.69685
P61626	LYZ	9	sp|P61626|LYSC_HUMAN Lysozyme C OS=Homo sapiens OX=9606 GN=LYZ PE=1 SV=1	25.1362	26.2412	4	4	-1.10499	-1.1035	0.149609	0.297671	No	No	No		3.09998
P61769	B2M	4	sp|P61769|B2MG_HUMAN Beta-2-microglobulin OS=Homo sapiens OX=9606 GN=B2M PE=1 SV=1	18.205	23.7946	0	1	-5.58961	-5.58209	3.20279e-07	5.16931e-06	No	No	Yes	2.54826	3.23985
P61978	HNRNPK	33	sp|P61978|HNRPK_HUMAN Heterogeneous nuclear ribonucleoprotein K OS=Homo sapiens OX=9606 GN=HNRNPK PE=1 SV=1	24.6723	24.4465	4	4	0.225796	0.225493	0.133192	0.271514	No	No	Yes	2.80407	2.94315
P62081	RPS7	15	sp|P62081|RS7_HUMAN 40S ribosomal protein S7 OS=Homo sapiens OX=9606 GN=RPS7 PE=1 SV=1	23.2268	23.7577	3	2	-0.530912	-0.530198	0.716648	0.802271	No	No	Yes	2.5971	2.8729
P62136	PPP1CA	6	sp|P62136|PP1A_HUMAN Serine/threonine-protein phosphatase PP1-alpha catalytic subunit OS=Homo sapiens OX=9606 GN=PPP1CA PE=1 SV=1	22.0399	21.4499	2	2	0.589939	0.589146	0.0169552	0.0510896	No	No	Yes	1.59704	3.10451
P62241	RPS8	15	sp|P62241|RS8_HUMAN 40S ribosomal protein S8 OS=Homo sapiens OX=9606 GN=RPS8 PE=1 SV=2	25.3122	23.7813	4	4	1.53094	1.52888	0.0932866	0.212693	No	No	Yes	3.25921	2.65599
P62244	RPS15A	10	sp|P62244|RS15A_HUMAN 40S ribosomal protein S15a OS=Homo sapiens OX=9606 GN=RPS15A PE=1 SV=2	24.8131	24.018	4	4	0.795059	0.79399	0.126696	0.26479	No	No	Yes	2.26434	3.07538
P62249	RPS16	13	sp|P62249|RS16_HUMAN 40S ribosomal protein S16 OS=Homo sapiens OX=9606 GN=RPS16 PE=1 SV=2	26.0035	25.4399	4	4	0.563628	0.56287	0.00611978	0.0198385	No	No	Yes	2.89184	2.64433
P62258	YWHAE	19	sp|P62258|1433E_HUMAN 14-3-3 protein epsilon OS=Homo sapiens OX=9606 GN=YWHAE PE=1 SV=1	21.9881	21.7796	3	3	0.208492	0.208211	0.878227	0.934009	No	No	Yes	2.75147	3.06125
P62263	RPS14	10	sp|P62263|RS14_HUMAN 40S ribosomal protein S14 OS=Homo sapiens OX=9606 GN=RPS14 PE=1 SV=3	25.1758	24.5735	4	4	0.602236	0.601426	0.0424555	0.110417	No	No	Yes	2.9006	2.41214
P62266	RPS23	8	sp|P62266|RS23_HUMAN 40S ribosomal protein S23 OS=Homo sapiens OX=9606 GN=RPS23 PE=1 SV=3	22.0826	22.789	3	1	-0.706318	-0.705369	0.502769	0.639239	No	No	Yes	2.64839	2.73854
P62269	RPS18	16	sp|P62269|RS18_HUMAN 40S ribosomal protein S18 OS=Homo sapiens OX=9606 GN=RPS18 PE=1 SV=3	23.5917	22.8941	4	2	0.697554	0.696616	0.236666	0.397707	No	No	Yes	2.65991	2.81419
P62277	RPS13	13	sp|P62277|RS13_HUMAN 40S ribosomal protein S13 OS=Homo sapiens OX=9606 GN=RPS13 PE=1 SV=2	24.5177	23.6154	4	4	0.902349	0.901136	0.0779706	0.185825	No	No	Yes	2.4528	2.48842
P62280	RPS11	17	sp|P62280|RS11_HUMAN 40S ribosomal protein S11 OS=Homo sapiens OX=9606 GN=RPS11 PE=1 SV=3	26.8531	26.504	4	4	0.349116	0.348647	0.0979884	0.221934	No	No	Yes	2.7963	1.31366
P62304	SNRPE	5	sp|P62304|RUXE_HUMAN Small nuclear ribonucleoprotein E OS=Homo sapiens OX=9606 GN=SNRPE PE=1 SV=1	21.1985	18.647	3	0	2.55148	2.54805	0.0317035	0.0877943	No	No	Yes	1.96253	2.65731
P62306	SNRPF	7	sp|P62306|RUXF_HUMAN Small nuclear ribonucleoprotein F OS=Homo sapiens OX=9606 GN=SNRPF PE=1 SV=1	23.1329	18.6597	1	0	4.47323	4.46722	8.8463e-06	5.87463e-05	No	No	Yes	2.34434	2.34066
P62316	SNRPD2	12	sp|P62316|SMD2_HUMAN Small nuclear ribonucleoprotein Sm D2 OS=Homo sapiens OX=9606 GN=SNRPD2 PE=1 SV=1	23.0042	23.4061	3	4	-0.401903	-0.401363	0.776038	0.858916	No	No	Yes	2.30634	2.72174
P62318	SNRPD3	7	sp|P62318|SMD3_HUMAN Small nuclear ribonucleoprotein Sm D3 OS=Homo sapiens OX=9606 GN=SNRPD3 PE=1 SV=1	23.1073	22.9174	3	1	0.18986	0.189604	0.894268	0.938158	No	No	Yes	2.21489	2.16065
P62424	RPL7A	20	sp|P62424|RL7A_HUMAN 60S ribosomal protein L7a OS=Homo sapiens OX=9606 GN=RPL7A PE=1 SV=2	22.244	18.6559	2	0	3.58806	3.58323	0.00059653	0.00214751	Yes	Yes	Yes	2.94274	2.83495
P62701	RPS4X	27	sp|P62701|RS4X_HUMAN 40S ribosomal protein S4, X isoform OS=Homo sapiens OX=9606 GN=RPS4X PE=1 SV=2	26.084	24.3684	4	2	1.71561	1.7133	0.118136	0.256302	No	No	Yes	3.20443	2.89245
P62750	RPL23A	10	sp|P62750|RL23A_HUMAN 60S ribosomal protein L23a OS=Homo sapiens OX=9606 GN=RPL23A PE=1 SV=1	24.9042	24.6772	4	4	0.227031	0.226725	0.469733	0.617682	No	No	Yes	2.75498	2.73944
P62753	RPS6	13	sp|P62753|RS6_HUMAN 40S ribosomal protein S6 OS=Homo sapiens OX=9606 GN=RPS6 PE=1 SV=1	23.3689	23.2073	4	4	0.161556	0.161338	0.30886	0.482407	No	No	Yes	3.34678	2.85075
P62805	HIST1H4A	18	sp|P62805|H4_HUMAN Histone H4 OS=Homo sapiens OX=9606 GN=H4C1 PE=1 SV=2	30.3684	30.0446	4	4	0.323845	0.32341	0.381824	0.542785	No	No	No		2.86586
P62826	RAN	16	sp|P62826|RAN_HUMAN GTP-binding nuclear protein Ran OS=Homo sapiens OX=9606 GN=RAN PE=1 SV=3	24.5436	24.3438	4	4	0.199756	0.199487	0.354147	0.523189	No	No	Yes	2.76044	2.78814
P62829	RPL23	13	sp|P62829|RL23_HUMAN 60S ribosomal protein L23 OS=Homo sapiens OX=9606 GN=RPL23 PE=1 SV=1	26.1575	25.9527	4	4	0.204806	0.204531	0.084074	0.195601	No	No	Yes	2.90959	2.89782
P62841	RPS15	5	sp|P62841|RS15_HUMAN 40S ribosomal protein S15 OS=Homo sapiens OX=9606 GN=RPS15 PE=1 SV=2	23.7813	18.6385	1	0	5.14276	5.13584	6.6029e-06	4.70457e-05	No	No	Yes	2.79018	1.7629
P62847	RPS24	5	sp|P62847|RS24_HUMAN 40S ribosomal protein S24 OS=Homo sapiens OX=9606 GN=RPS24 PE=1 SV=1	21.3084	21.5367	3	2	-0.228295	-0.227988	0.750621	0.836197	No	No	Yes	3.3367	2.8312
P62851	RPS25	6	sp|P62851|RS25_HUMAN 40S ribosomal protein S25 OS=Homo sapiens OX=9606 GN=RPS25 PE=1 SV=1	24.4048	23.6962	4	4	0.708564	0.707612	0.0834591	0.195601	No	No	Yes	2.47132	2.29623
P62854	RPS26	3	sp|P62854|RS26_HUMAN 40S ribosomal protein S26 OS=Homo sapiens OX=9606 GN=RPS26 PE=1 SV=3;sp|Q5JNZ5|RS26L_HUMAN Putative 40S ribosomal protein S26-like 1 OS=Homo sapiens OX=9606 GN=RPS26P11 PE=5 SV=1	18.209	22.2035	0	1	-3.99452	-3.98915	1.22912e-08	4.42484e-07	No	No	Yes	1.36565	1.27875
P62857	RPS28	8	sp|P62857|RS28_HUMAN 40S ribosomal protein S28 OS=Homo sapiens OX=9606 GN=RPS28 PE=1 SV=1	23.097	22.7159	4	4	0.381045	0.380533	0.152197	0.300008	No	No	Yes	2.06059	1.81816
P62861	FAU	3	sp|P62861|RS30_HUMAN 40S ribosomal protein S30 OS=Homo sapiens OX=9606 GN=FAU PE=1 SV=1	22.0411	23.0256	3	2	-0.984446	-0.983122	0.36489	0.530908	No	No	Yes	2.66905
P62873	GNB1	10	sp|P62873|GBB1_HUMAN Guanine nucleotide-binding protein G(I)/G(S)/G(T) subunit beta-1 OS=Homo sapiens OX=9606 GN=GNB1 PE=1 SV=3	24.475	24.4908	4	4	-0.0157194	-0.0156983	0.930768	0.955924	No	No	Yes	2.17474	2.51056
P62888	RPL30	8	sp|P62888|RL30_HUMAN 60S ribosomal protein L30 OS=Homo sapiens OX=9606 GN=RPL30 PE=1 SV=2	24.762	24.1812	4	4	0.580818	0.580037	0.0339188	0.0928017	No	No	Yes	3.14785	2.94378
P62899	RPL31	10	sp|P62899|RL31_HUMAN 60S ribosomal protein L31 OS=Homo sapiens OX=9606 GN=RPL31 PE=1 SV=1	26.9091	26.2357	4	4	0.673361	0.672456	0.293468	0.465736	No	No	Yes	3.01301	2.55246
P62906	RPL10A	10	sp|P62906|RL10A_HUMAN 60S ribosomal protein L10a OS=Homo sapiens OX=9606 GN=RPL10A PE=1 SV=2	25.3453	23.3553	4	3	1.98998	1.98731	0.269579	0.441129	No	No	Yes	2.64508	3.35436
P62910	RPL32	15	sp|P62910|RL32_HUMAN 60S ribosomal protein L32 OS=Homo sapiens OX=9606 GN=RPL32 PE=1 SV=2	28.9498	28.5217	4	4	0.42808	0.427504	0.119134	0.257058	No	No	Yes	3.02606	1.97474
P62913	RPL11	13	sp|P62913|RL11_HUMAN 60S ribosomal protein L11 OS=Homo sapiens OX=9606 GN=RPL11 PE=1 SV=2	25.8276	25.4236	4	4	0.403945	0.403402	0.042394	0.110417	No	No	Yes	2.88119	2.72001
P62917	RPL8	16	sp|P62917|RL8_HUMAN 60S ribosomal protein L8 OS=Homo sapiens OX=9606 GN=RPL8 PE=1 SV=2	25.6384	23.1154	4	3	2.52292	2.51953	0.179561	0.334658	No	No	Yes	2.79045	2.73012
P62937	PPIA	15	sp|P62937|PPIA_HUMAN Peptidyl-prolyl cis-trans isomerase A OS=Homo sapiens OX=9606 GN=PPIA PE=1 SV=2	24.6587	24.5884	4	4	0.0703202	0.0702256	0.601762	0.714342	No	No	Yes	1.89325	2.07972
P62979	RPS27A	12	sp|P62979|RS27A_HUMAN Ubiquitin-40S ribosomal protein S27a OS=Homo sapiens OX=9606 GN=RPS27A PE=1 SV=2;sp|P62987|RL40_HUMAN Ubiquitin-60S ribosomal protein L40 OS=Homo sapiens OX=9606 GN=UBA52 PE=1 SV=2;sp|P0CG47|UBB_HUMAN Polyubiquitin-B OS=Homo sapiens O	27.1943	27.2655	4	4	-0.0712044	-0.0711086	0.59288	0.708969	No	No	Yes	3.21709	1.60949
P62995	TRA2B	13	sp|P62995|TRA2B_HUMAN Transformer-2 protein homolog beta OS=Homo sapiens OX=9606 GN=TRA2B PE=1 SV=1	24.3921	21.5388	4	3	2.85334	2.8495	0.0429465	0.11127	No	No	Yes	2.14095	2.98815
P63000	RAC1	5	sp|P63000|RAC1_HUMAN Ras-related C3 botulinum toxin substrate 1 OS=Homo sapiens OX=9606 GN=RAC1 PE=1 SV=1	23.4691	23.3465	4	4	0.122645	0.12248	0.183884	0.33905	No	No	Yes	2.24581	3.08696
P63010	AP2B1	30	sp|P63010|AP2B1_HUMAN AP-2 complex subunit beta OS=Homo sapiens OX=9606 GN=AP2B1 PE=1 SV=1	21.2764	22.1763	1	1	-0.899841	-0.898631	0.000377991	0.00140514	No	No	Yes	1.85271	3.73351
P63092	GNAS	8	sp|P63092|GNAS2_HUMAN Guanine nucleotide-binding protein G(s) subunit alpha isoforms short OS=Homo sapiens OX=9606 GN=GNAS PE=1 SV=1;sp|Q5JWF2|GNAS1_HUMAN Guanine nucleotide-binding protein G(s) subunit alpha isoforms XLas OS=Homo sapiens OX=9606 GN=GNAS P	21.0741	21.7386	3	2	-0.664508	-0.663614	0.352665	0.523189	No	No	No
P63104	YWHAZ	22	sp|P63104|1433Z_HUMAN 14-3-3 protein zeta/delta OS=Homo sapiens OX=9606 GN=YWHAZ PE=1 SV=1	23.1208	23.5246	4	4	-0.403865	-0.403322	0.500858	0.639155	No	No	Yes	2.21644	3.08462
P63162	SNRPN	8	sp|P63162|RSMN_HUMAN Small nuclear ribonucleoprotein-associated protein N OS=Homo sapiens OX=9606 GN=SNRPN PE=1 SV=1;sp|P14678|RSMB_HUMAN Small nuclear ribonucleoprotein-associated proteins B and B OS=Homo sapiens OX=9606 GN=SNRPB PE=1 SV=2	22.988	22.6093	3	4	0.378671	0.378162	0.783615	0.864505	No	No	No		2.81437
P63167	DYNLL1	4	sp|P63167|DYL1_HUMAN Dynein light chain 1, cytoplasmic OS=Homo sapiens OX=9606 GN=DYNLL1 PE=1 SV=1	22.0873	21.5815	3	3	0.505771	0.505091	0.706921	0.801356	No	No	Yes	2.05226	3.13455
P63173	RPL38	6	sp|P63173|RL38_HUMAN 60S ribosomal protein L38 OS=Homo sapiens OX=9606 GN=RPL38 PE=1 SV=2	24.3361	24.3071	4	4	0.029015	0.028976	0.869736	0.92953	No	No	Yes	2.91939	2.85995
P63220	RPS21	8	sp|P63220|RS21_HUMAN 40S ribosomal protein S21 OS=Homo sapiens OX=9606 GN=RPS21 PE=1 SV=1	21.2974	21.2073	3	2	0.0900305	0.0899095	0.907687	0.944597	No	No	Yes	2.75574	0.0253059
P63241	EIF5A	21	sp|P63241|IF5A1_HUMAN Eukaryotic translation initiation factor 5A-1 OS=Homo sapiens OX=9606 GN=EIF5A PE=1 SV=2;sp|Q6IS14|IF5AL_HUMAN Eukaryotic translation initiation factor 5A-1-like OS=Homo sapiens OX=9606 GN=EIF5AL1 PE=2 SV=2	20.0142	20.8189	3	4	-0.804725	-0.803643	0.227319	0.388716	No	No	Yes	1.48448	2.79268
P63244	GNB2L1	23	sp|P63244|RACK1_HUMAN Receptor of activated protein C kinase 1 OS=Homo sapiens OX=9606 GN=RACK1 PE=1 SV=3	26.0808	25.9148	4	4	0.166054	0.165831	0.291282	0.465736	No	No	No		2.96011
P63261	ACTG1	2	sp|P63261|ACTG_HUMAN Actin, cytoplasmic 2 OS=Homo sapiens OX=9606 GN=ACTG1 PE=1 SV=1	28.7729	28.8812	4	4	-0.10825	-0.108104	0.492417	0.6343	No	No	Yes	3.1112	3.2269
P68032	ACTC1	3	sp|P68032|ACTC_HUMAN Actin, alpha cardiac muscle 1 OS=Homo sapiens OX=9606 GN=ACTC1 PE=1 SV=1;sp|P63267|ACTH_HUMAN Actin, gamma-enteric smooth muscle OS=Homo sapiens OX=9606 GN=ACTG2 PE=1 SV=1;sp|P68133|ACTS_HUMAN Actin, alpha skeletal muscle OS=Homo sapie	21.9728	22.6722	3	2	-0.699394	-0.698454	0.504859	0.640674	No	No	No		3.20225
P68104	EEF1A1	23	sp|P68104|EF1A1_HUMAN Elongation factor 1-alpha 1 OS=Homo sapiens OX=9606 GN=EEF1A1 PE=1 SV=1;sp|Q5VTE0|EF1A3_HUMAN Putative elongation factor 1-alpha-like 3 OS=Homo sapiens OX=9606 GN=EEF1A1P5 PE=5 SV=1	27.7557	27.733	4	4	0.0227242	0.0226936	0.882299	0.934009	No	No	Yes	1.77524	3.54809
P68363	TUBA1B	0	sp|P68363|TBA1B_HUMAN Tubulin alpha-1B chain OS=Homo sapiens OX=9606 GN=TUBA1B PE=1 SV=1	27.2308	27.1112	4	4	0.119581	0.11942	0.584414	0.701296	No	No	Yes	2.96607	2.80779
P68366	TUBA4A	4	sp|P68366|TBA4A_HUMAN Tubulin alpha-4A chain OS=Homo sapiens OX=9606 GN=TUBA4A PE=1 SV=1	21.1469	18.6473	2	0	2.49955	2.49619	0.000313559	0.00118494	Yes	Yes	Yes	0.621791	2.85106
P68371	TUBB4B	2	sp|P68371|TBB4B_HUMAN Tubulin beta-4B chain OS=Homo sapiens OX=9606 GN=TUBB4B PE=1 SV=1	26.8037	26.722	4	4	0.0817121	0.0816022	0.565669	0.689692	No	No	Yes	1.60417	2.83413
P68871	HBB	4	sp|P68871|HBB_HUMAN Hemoglobin subunit beta OS=Homo sapiens OX=9606 GN=HBB PE=1 SV=2;sp|P02042|HBD_HUMAN Hemoglobin subunit delta OS=Homo sapiens OX=9606 GN=HBD PE=1 SV=2	18.2878	22.2015	0	1	-3.91369	-3.90843	1.72305e-07	3.45628e-06	No	No	No		2.90308
P69905	HBA1	2	sp|P69905|HBA_HUMAN Hemoglobin subunit alpha OS=Homo sapiens OX=9606 GN=HBA1 PE=1 SV=2	18.262	20.8505	0	1	-2.58852	-2.58504	1.16735e-05	7.39322e-05	No	No	No		2.97899
P78347	GTF2I	44	sp|P78347|GTF2I_HUMAN General transcription factor II-I OS=Homo sapiens OX=9606 GN=GTF2I PE=1 SV=2	22.6605	18.6271	2	0	4.03342	4.02799	0.0146593	0.044964	Yes	Yes	Yes	0.950152	3.30297
P78371	CCT2	37	sp|P78371|TCPB_HUMAN T-complex protein 1 subunit beta OS=Homo sapiens OX=9606 GN=CCT2 PE=1 SV=4	24.5445	18.6316	2	0	5.91294	5.90499	3.15727e-09	1.54255e-07	Yes	Yes	Yes	2.42065	3.14523
P78527	PRKDC	199	sp|P78527|PRKDC_HUMAN DNA-dependent protein kinase catalytic subunit OS=Homo sapiens OX=9606 GN=PRKDC PE=1 SV=3	19.7199	18.6433	2	0	1.07654	1.07509	0.0146567	0.044964	Yes	Yes	Yes	2.41361	4.37189
P80188	LCN2	4	sp|P80188|NGAL_HUMAN Neutrophil gelatinase-associated lipocalin OS=Homo sapiens OX=9606 GN=LCN2 PE=1 SV=2	18.2504	20.5153	0	1	-2.26492	-2.26188	3.76065e-08	9.67246e-07	No	No	No
P81605	DCD	3	sp|P81605|DCD_HUMAN Dermcidin OS=Homo sapiens OX=9606 GN=DCD PE=1 SV=2	26.4891	26.5492	4	4	-0.0600265	-0.0599458	0.837435	0.904906	No	No	No		3.20049
P82979	SARNP	9	sp|P82979|SARNP_HUMAN SAP domain-containing ribonucleoprotein OS=Homo sapiens OX=9606 GN=SARNP PE=1 SV=3	22.5538	22.7058	2	2	-0.151969	-0.151765	0.66194	0.760218	No	No	Yes	1.06907	1.80127
P83731	RPL24	8	sp|P83731|RL24_HUMAN 60S ribosomal protein L24 OS=Homo sapiens OX=9606 GN=RPL24 PE=1 SV=1	24.6562	24.3742	4	4	0.281999	0.28162	0.19597	0.354613	No	No	Yes	2.67694	2.18696
P84077	ARF1	11	sp|P84077|ARF1_HUMAN ADP-ribosylation factor 1 OS=Homo sapiens OX=9606 GN=ARF1 PE=1 SV=2;sp|P61204|ARF3_HUMAN ADP-ribosylation factor 3 OS=Homo sapiens OX=9606 GN=ARF3 PE=1 SV=2	22.1708	21.7827	4	2	0.388133	0.387611	0.545878	0.673972	No	No	Yes	2.71074	3.2508
P84090	ERH	8	sp|P84090|ERH_HUMAN Enhancer of rudimentary homolog OS=Homo sapiens OX=9606 GN=ERH PE=1 SV=1	23.067	18.6296	1	0	4.43732	4.43135	8.25131e-06	5.53323e-05	No	No	Yes	2.34998	2.89479
P84098	RPL19	12	sp|P84098|RL19_HUMAN 60S ribosomal protein L19 OS=Homo sapiens OX=9606 GN=RPL19 PE=1 SV=1	23.4672	23.3495	4	4	0.117675	0.117517	0.148746	0.297492	No	No	Yes	2.80808
P84103	SRSF3	10	sp|P84103|SRSF3_HUMAN Serine/arginine-rich splicing factor 3 OS=Homo sapiens OX=9606 GN=SRSF3 PE=1 SV=1	26.932	26.631	4	4	0.301005	0.3006	0.280541	0.453641	No	No	Yes	2.44397	1.56703
P84243	H3F3A	1	sp|P84243|H33_HUMAN Histone H3.3 OS=Homo sapiens OX=9606 GN=H3-3A PE=1 SV=2	29.8804	28.6006	4	4	1.2798	1.27808	0.0529586	0.133667	No	No	Yes	0.858269	2.07639
Q00325	SLC25A3	20	sp|Q00325|MPCP_HUMAN Phosphate carrier protein, mitochondrial OS=Homo sapiens OX=9606 GN=SLC25A3 PE=1 SV=2	22.4168	18.6492	2	0	3.7676	3.76254	1.27404e-05	7.72596e-05	Yes	Yes	Yes	2.4465	3.7094
Q00341	HDLBP	39	sp|Q00341|VIGLN_HUMAN Vigilin OS=Homo sapiens OX=9606 GN=HDLBP PE=1 SV=2	20.8568	18.647	2	0	2.2098	2.20683	0.000226931	0.000876953	Yes	Yes	Yes	2.11397	3.30049
Q00610	CLTC	79	sp|Q00610|CLH1_HUMAN Clathrin heavy chain 1 OS=Homo sapiens OX=9606 GN=CLTC PE=1 SV=5	25.2629	24.7479	4	4	0.514964	0.514272	0.0399566	0.105523	No	No	Yes	2.33965	4.00245
Q00839	HNRNPU	57	sp|Q00839|HNRPU_HUMAN Heterogeneous nuclear ribonucleoprotein U OS=Homo sapiens OX=9606 GN=HNRNPU PE=1 SV=6	26.4857	26.0424	4	4	0.443287	0.442691	0.104835	0.235879	No	No	Yes	2.76484	3.12577
Q01105	SET	6	sp|Q01105|SET_HUMAN Protein SET OS=Homo sapiens OX=9606 GN=SET PE=1 SV=3;sp|P0DME0|SETLP_HUMAN Protein SETSIP OS=Homo sapiens OX=9606 GN=SETSIP PE=1 SV=1	21.7586	22.4215	1	1	-0.662901	-0.662009	0.0151532	0.0460657	No	No	Yes	2.60946	2.99551
Q01130	SRSF2	5	sp|Q01130|SRSF2_HUMAN Serine/arginine-rich splicing factor 2 OS=Homo sapiens OX=9606 GN=SRSF2 PE=1 SV=4	25.1981	25.0476	4	4	0.150511	0.150309	0.3866	0.545225	No	No	Yes	2.42873	0.945961
Q01469	FABP5	18	sp|Q01469|FABP5_HUMAN Fatty acid-binding protein 5 OS=Homo sapiens OX=9606 GN=FABP5 PE=1 SV=3	25.5867	25.7916	4	4	-0.204872	-0.204597	0.354138	0.523189	No	No	Yes	0.907025	1.33041
Q01546	KRT76	0	sp|Q01546|K22O_HUMAN Keratin, type II cytoskeletal 2 oral OS=Homo sapiens OX=9606 GN=KRT76 PE=1 SV=2	21.5812	22.0766	1	1	-0.495403	-0.494737	0.00347533	0.0115957	No	No	No
Q01780	EXOSC10	21	sp|Q01780|EXOSX_HUMAN Exosome component 10 OS=Homo sapiens OX=9606 GN=EXOSC10 PE=1 SV=2	21.6243	18.669	2	0	2.9553	2.95132	3.8607e-06	3.23721e-05	Yes	Yes	Yes	1.58989	3.53616
Q01844	EWSR1	8	sp|Q01844|EWS_HUMAN RNA-binding protein EWS OS=Homo sapiens OX=9606 GN=EWSR1 PE=1 SV=1	22.5506	23.4992	3	1	-0.94862	-0.947344	0.461191	0.610164	No	No	Yes	2.2408	1.71659
Q02241	KIF23	62	sp|Q02241|KIF23_HUMAN Kinesin-like protein KIF23 OS=Homo sapiens OX=9606 GN=KIF23 PE=1 SV=3	25.8266	26.0491	4	4	-0.222513	-0.222214	0.534696	0.66376	No	No	Yes	1.8329	3.13572
Q02413	DSG1	36	sp|Q02413|DSG1_HUMAN Desmoglein-1 OS=Homo sapiens OX=9606 GN=DSG1 PE=1 SV=2	27.8751	27.8799	4	4	-0.00477432	-0.0047679	0.977183	0.989721	No	No	No		3.78496
Q02543	RPL18A	12	sp|Q02543|RL18A_HUMAN 60S ribosomal protein L18a OS=Homo sapiens OX=9606 GN=RPL18A PE=1 SV=2	25.7773	25.454	4	4	0.323264	0.322829	0.320816	0.496466	No	No	Yes	1.74695	2.75252
Q02790	FKBP4	28	sp|Q02790|FKBP4_HUMAN Peptidyl-prolyl cis-trans isomerase FKBP4 OS=Homo sapiens OX=9606 GN=FKBP4 PE=1 SV=3	21.9281	18.6082	2	0	3.3199	3.31544	4.94185e-06	3.79178e-05	Yes	Yes	Yes	1.70772	2.96496
Q02818	NUCB1	4	sp|Q02818|NUCB1_HUMAN Nucleobindin-1 OS=Homo sapiens OX=9606 GN=NUCB1 PE=1 SV=4	18.2476	22.7808	0	1	-4.53321	-4.52711	8.68476e-09	3.32267e-07	No	No	Yes	1.62102	3.03197
Q02878	RPL6	20	sp|Q02878|RL6_HUMAN 60S ribosomal protein L6 OS=Homo sapiens OX=9606 GN=RPL6 PE=1 SV=3	24.4363	24.0033	4	4	0.433061	0.432479	0.157071	0.306962	No	No	Yes	2.24608	3.08047
Q02880	TOP2B	48	sp|Q02880|TOP2B_HUMAN DNA topoisomerase 2-beta OS=Homo sapiens OX=9606 GN=TOP2B PE=1 SV=3	22.0218	21.5734	3	1	0.448411	0.447808	0.669004	0.766497	No	No	Yes	2.27316	3.69512
Q02978	SLC25A11	21	sp|Q02978|M2OM_HUMAN Mitochondrial 2-oxoglutarate/malate carrier protein OS=Homo sapiens OX=9606 GN=SLC25A11 PE=1 SV=3	21.1486	18.6697	1	0	2.47888	2.47555	2.33528e-05	0.000126773	No	No	Yes	1.55157	3.40901
Q03001	DST	14	sp|Q03001|DYST_HUMAN Dystonin OS=Homo sapiens OX=9606 GN=DST PE=1 SV=4	19.7795	18.6297	1	0	1.14982	1.14827	0.000236561	0.000903955	No	No	Yes	2.21165	4.13033
Q03252	LMNB2	51	sp|Q03252|LMNB2_HUMAN Lamin-B2 OS=Homo sapiens OX=9606 GN=LMNB2 PE=1 SV=4	23.4748	23.4692	4	4	0.00568245	0.00567481	0.97903	0.989721	No	No	Yes	1.88455	2.62331
Q05519	SRSF11	7	sp|Q05519|SRS11_HUMAN Serine/arginine-rich splicing factor 11 OS=Homo sapiens OX=9606 GN=SRSF11 PE=1 SV=1	23.5263	23.4392	4	4	0.0871128	0.0869956	0.475348	0.62287	No	No	Yes	2.78586	2.68784
Q06830	PRDX1	17	sp|Q06830|PRDX1_HUMAN Peroxiredoxin-1 OS=Homo sapiens OX=9606 GN=PRDX1 PE=1 SV=1	26.4254	26.6104	4	4	-0.184977	-0.184728	0.241241	0.40246	No	No	Yes	2.25726	2.96142
Q07020	RPL18	11	sp|Q07020|RL18_HUMAN 60S ribosomal protein L18 OS=Homo sapiens OX=9606 GN=RPL18 PE=1 SV=2	25.6772	25.5622	4	4	0.115006	0.114852	0.522882	0.658658	No	No	Yes	2.9048	2.76707
Q07065	CKAP4	43	sp|Q07065|CKAP4_HUMAN Cytoskeleton-associated protein 4 OS=Homo sapiens OX=9606 GN=CKAP4 PE=1 SV=2	21.8501	22.2779	4	2	-0.427789	-0.427214	0.12451	0.262981	No	No	Yes	2.41986	3.2465
Q07666	KHDRBS1	16	sp|Q07666|KHDR1_HUMAN KH domain-containing, RNA-binding, signal transduction-associated protein 1 OS=Homo sapiens OX=9606 GN=KHDRBS1 PE=1 SV=1	23.2055	22.7307	4	4	0.474743	0.474105	0.0213996	0.0628078	No	No	Yes	2.48772	0.984527
Q07955	SRSF1	21	sp|Q07955|SRSF1_HUMAN Serine/arginine-rich splicing factor 1 OS=Homo sapiens OX=9606 GN=SRSF1 PE=1 SV=2	26.4377	26.2832	4	4	0.15451	0.154302	0.361355	0.530401	No	No	Yes	2.09411	1.82892
Q08170	SRSF4	8	sp|Q08170|SRSF4_HUMAN Serine/arginine-rich splicing factor 4 OS=Homo sapiens OX=9606 GN=SRSF4 PE=1 SV=2	21.7878	18.6068	1	0	3.18106	3.17678	1.1996e-05	7.45931e-05	No	No	Yes	2.34553	0.788875
Q08188	TGM3	27	sp|Q08188|TGM3_HUMAN Protein-glutamine gamma-glutamyltransferase E OS=Homo sapiens OX=9606 GN=TGM3 PE=1 SV=4	25.7179	25.9233	4	4	-0.205406	-0.20513	0.369262	0.5319	No	No	No		3.59239
Q08209	PPP3CA	5	sp|Q08209|PP2BA_HUMAN Serine/threonine-protein phosphatase 2B catalytic subunit alpha isoform OS=Homo sapiens OX=9606 GN=PPP3CA PE=1 SV=1	18.2353	21.7764	0	1	-3.54107	-3.53631	5.30348e-06	3.94302e-05	No	No	Yes	2.13703	3.34607
Q08211	DHX9	69	sp|Q08211|DHX9_HUMAN ATP-dependent RNA helicase A OS=Homo sapiens OX=9606 GN=DHX9 PE=1 SV=4	25.0519	24.1462	4	4	0.905671	0.904453	0.00997285	0.0317276	No	No	Yes	2.22269	3.85333
Q08554	DSC1	19	sp|Q08554|DSC1_HUMAN Desmocollin-1 OS=Homo sapiens OX=9606 GN=DSC1 PE=1 SV=2	27.0808	26.963	4	4	0.117848	0.117689	0.622506	0.72414	No	No	No		3.76662
Q08945	SSRP1	31	sp|Q08945|SSRP1_HUMAN FACT complex subunit SSRP1 OS=Homo sapiens OX=9606 GN=SSRP1 PE=1 SV=1	22.9119	22.2754	4	4	0.636533	0.635677	0.325012	0.501825	No	No	Yes	2.60338	3.3146
Q09028	RBBP4	11	sp|Q09028|RBBP4_HUMAN Histone-binding protein RBBP4 OS=Homo sapiens OX=9606 GN=RBBP4 PE=1 SV=3	20.5169	18.6787	1	0	1.83824	1.83577	4.58871e-05	0.000219488	No	No	Yes	2.13902	2.68997
Q0D2I5	IFFO1	4	sp|Q0D2I5|IFFO1_HUMAN Intermediate filament family orphan 1 OS=Homo sapiens OX=9606 GN=IFFO1 PE=1 SV=2	18.2112	21.2765	0	2	-3.0653	-3.06118	2.81231e-05	0.000149118	Yes	Yes	Yes	1.28922
Q12872	SFSWAP	3	sp|Q12872|SFSWA_HUMAN Splicing factor, suppressor of white-apricot homolog OS=Homo sapiens OX=9606 GN=SFSWAP PE=1 SV=3	20.61	18.6594	1	0	1.95063	1.94801	9.41233e-05	0.000394972	No	No	Yes	1.84154
Q12874	SF3A3	22	sp|Q12874|SF3A3_HUMAN Splicing factor 3A subunit 3 OS=Homo sapiens OX=9606 GN=SF3A3 PE=1 SV=1	20.0697	18.6324	1	0	1.43739	1.43546	0.000337622	0.00126193	No	No	Yes	1.86603	2.76265
Q12905	ILF2	22	sp|Q12905|ILF2_HUMAN Interleukin enhancer-binding factor 2 OS=Homo sapiens OX=9606 GN=ILF2 PE=1 SV=2	20.7277	18.636	2	0	2.09174	2.08893	1.20808e-06	1.41261e-05	Yes	Yes	Yes	2.34519	3.0361
Q12906	ILF3	40	sp|Q12906|ILF3_HUMAN Interleukin enhancer-binding factor 3 OS=Homo sapiens OX=9606 GN=ILF3 PE=1 SV=3	22.5788	21.786	4	1	0.792748	0.791682	0.0371944	0.0993788	No	No	Yes	2.49505	2.89245
Q13123	IK	14	sp|Q13123|RED_HUMAN Protein Red OS=Homo sapiens OX=9606 GN=IK PE=1 SV=3	21.0369	21.6123	3	1	-0.57542	-0.574647	0.445858	0.597974	No	No	Yes	1.95658	2.50085
Q13151	HNRNPA0	16	sp|Q13151|ROA0_HUMAN Heterogeneous nuclear ribonucleoprotein A0 OS=Homo sapiens OX=9606 GN=HNRNPA0 PE=1 SV=1	21.7841	18.633	1	0	3.15109	3.14686	2.62607e-05	0.000141436	No	No	Yes	2.24994	2.9732
Q13185	CBX3	8	sp|Q13185|CBX3_HUMAN Chromobox protein homolog 3 OS=Homo sapiens OX=9606 GN=CBX3 PE=1 SV=4	22.3806	21.1615	4	3	1.21918	1.21754	0.232163	0.393087	No	No	Yes	2.50421	2.92005
Q13242	SRSF9	20	sp|Q13242|SRSF9_HUMAN Serine/arginine-rich splicing factor 9 OS=Homo sapiens OX=9606 GN=SRSF9 PE=1 SV=1	21.37	21.0817	3	2	0.288247	0.287859	0.758338	0.84342	No	No	Yes	1.93466	0.892651
Q13247	SRSF6	11	sp|Q13247|SRSF6_HUMAN Serine/arginine-rich splicing factor 6 OS=Homo sapiens OX=9606 GN=SRSF6 PE=1 SV=2	26.1563	26.1392	4	4	0.0171147	0.0170917	0.878269	0.934009	No	No	Yes	1.97658	0.788875
Q13283	G3BP1	20	sp|Q13283|G3BP1_HUMAN Ras GTPase-activating protein-binding protein 1 OS=Homo sapiens OX=9606 GN=G3BP1 PE=1 SV=1	21.3331	18.6593	3	0	2.67378	2.67018	0.029773	0.0838054	No	No	Yes	2.12308	3.05378
Q13410	BTN1A1	4	sp|Q13410|BT1A1_HUMAN Butyrophilin subfamily 1 member A1 OS=Homo sapiens OX=9606 GN=BTN1A1 PE=1 SV=3	18.1944	20.6595	0	1	-2.46504	-2.46173	0.000128591	0.000526685	No	No	No
Q13427	PPIG	11	sp|Q13427|PPIG_HUMAN Peptidyl-prolyl cis-trans isomerase G OS=Homo sapiens OX=9606 GN=PPIG PE=1 SV=2	21.3482	18.6819	1	0	2.66633	2.66274	3.70913e-06	3.17131e-05	No	No	Yes	2.57591	2.66214
Q13435	SF3B2	31	sp|Q13435|SF3B2_HUMAN Splicing factor 3B subunit 2 OS=Homo sapiens OX=9606 GN=SF3B2 PE=1 SV=2	21.0314	18.7147	2	0	2.31675	2.31363	0.000935824	0.00326583	Yes	Yes	Yes	2.21546	2.6068
Q13439	GOLGA4	5	sp|Q13439|GOGA4_HUMAN Golgin subfamily A member 4 OS=Homo sapiens OX=9606 GN=GOLGA4 PE=1 SV=1	22.9786	18.624	1	0	4.35457	4.34871	8.92162e-07	1.15139e-05	No	No	Yes	2.54705
Q13510	ASAH1	5	sp|Q13510|ASAH1_HUMAN Acid ceramidase OS=Homo sapiens OX=9606 GN=ASAH1 PE=1 SV=5	21.6675	18.6825	2	0	2.98504	2.98103	3.44087e-05	0.000170547	Yes	Yes	Yes	1.56545	3.59083
Q13523	PRPF4B	18	sp|Q13523|PRP4B_HUMAN Serine/threonine-protein kinase PRP4 homolog OS=Homo sapiens OX=9606 GN=PRPF4B PE=1 SV=3	23.4216	23.1646	4	4	0.257038	0.256692	0.245044	0.407811	No	No	Yes	2.4468	2.8126
Q13595	TRA2A	11	sp|Q13595|TRA2A_HUMAN Transformer-2 protein homolog alpha OS=Homo sapiens OX=9606 GN=TRA2A PE=1 SV=1	23.5982	22.8208	4	4	0.777432	0.776387	0.00529568	0.0173313	No	No	Yes	2.20271	2.98708
Q13835	PKP1	22	sp|Q13835|PKP1_HUMAN Plakophilin-1 OS=Homo sapiens OX=9606 GN=PKP1 PE=1 SV=2	25.6511	25.8975	4	4	-0.246426	-0.246095	0.268462	0.440355	No	No	No		2.4849
Q13838	DDX39B	18	sp|Q13838|DX39B_HUMAN Spliceosome RNA helicase DDX39B OS=Homo sapiens OX=9606 GN=DDX39B PE=1 SV=1	23.5601	23.4274	4	4	0.132701	0.132522	0.382943	0.542785	No	No	Yes	1.08653	3.5329
Q13867	BLMH	14	sp|Q13867|BLMH_HUMAN Bleomycin hydrolase OS=Homo sapiens OX=9606 GN=BLMH PE=1 SV=1	23.9785	24.0057	4	4	-0.0271924	-0.0271558	0.908692	0.944597	No	No	Yes	1.61497	3.46655
Q14008	CKAP5	52	sp|Q14008|CKAP5_HUMAN Cytoskeleton-associated protein 5 OS=Homo sapiens OX=9606 GN=CKAP5 PE=1 SV=3	21.4217	18.6553	2	0	2.76643	2.76271	0.00134965	0.00461579	Yes	Yes	Yes	2.13092	4.037
Q14103	HNRNPD	21	sp|Q14103|HNRPD_HUMAN Heterogeneous nuclear ribonucleoprotein D0 OS=Homo sapiens OX=9606 GN=HNRNPD PE=1 SV=1	22.3267	22.0898	4	4	0.236908	0.23659	0.0440734	0.113331	No	No	Yes	2.51507	3.02262
Q14126	DSG2	22	sp|Q14126|DSG2_HUMAN Desmoglein-2 OS=Homo sapiens OX=9606 GN=DSG2 PE=1 SV=2	21.901	22.408	2	4	-0.507049	-0.506368	0.0431863	0.111469	No	No	Yes	2.34473	3.83878
Q14152	EIF3A	50	sp|Q14152|EIF3A_HUMAN Eukaryotic translation initiation factor 3 subunit A OS=Homo sapiens OX=9606 GN=EIF3A PE=1 SV=1	22.1568	21.2767	1	1	0.880071	0.878888	0.000117957	0.000486038	No	No	Yes	2.97899	2.87543
Q14204	DYNC1H1	146	sp|Q14204|DYHC1_HUMAN Cytoplasmic dynein 1 heavy chain 1 OS=Homo sapiens OX=9606 GN=DYNC1H1 PE=1 SV=5	20.1535	21.0445	3	2	-0.891074	-0.889876	0.0891908	0.205166	No	No	Yes	2.51645	4.26653
Q14444	CAPRIN1	13	sp|Q14444|CAPR1_HUMAN Caprin-1 OS=Homo sapiens OX=9606 GN=CAPRIN1 PE=1 SV=2	21.1348	18.6503	1	0	2.48449	2.48115	0.00014156	0.000569571	No	No	Yes	1.97451	2.40748
Q14498	RBM39	26	sp|Q14498|RBM39_HUMAN RNA-binding protein 39 OS=Homo sapiens OX=9606 GN=RBM39 PE=1 SV=2	26.023	25.8487	4	4	0.174232	0.173997	0.14487	0.291444	No	No	Yes	2.4528	3.09049
Q14574	DSC3	9	sp|Q14574|DSC3_HUMAN Desmocollin-3 OS=Homo sapiens OX=9606 GN=DSC3 PE=1 SV=3	23.8074	23.6974	4	4	0.110068	0.10992	0.533466	0.66376	No	No	Yes	1.85987	3.844
Q14684	RRP1B	34	sp|Q14684|RRP1B_HUMAN Ribosomal RNA processing protein 1 homolog B OS=Homo sapiens OX=9606 GN=RRP1B PE=1 SV=3	21.3585	21.7761	3	1	-0.417617	-0.417056	0.602596	0.714342	No	No	Yes	2.14002	3.2145
Q14694	USP10	8	sp|Q14694|UBP10_HUMAN Ubiquitin carboxyl-terminal hydrolase 10 OS=Homo sapiens OX=9606 GN=USP10 PE=1 SV=2	19.7398	18.6542	2	0	1.08558	1.08412	4.08498e-06	3.32634e-05	Yes	Yes	Yes	1.96541	3.12029
Q14766	LTBP1	21	sp|Q14766|LTBP1_HUMAN Latent-transforming growth factor beta-binding protein 1 OS=Homo sapiens OX=9606 GN=LTBP1 PE=1 SV=4	18.2563	22.9059	0	2	-4.64965	-4.6434	1.27636e-05	7.72596e-05	Yes	Yes	Yes	1.67354	2.95072
Q14956	GPNMB	2	sp|Q14956|GPNMB_HUMAN Transmembrane glycoprotein NMB OS=Homo sapiens OX=9606 GN=GPNMB PE=1 SV=2	20.4794	18.7043	1	0	1.77508	1.77269	3.56749e-06	3.08882e-05	No	No	No		3.72413
Q14974	KPNB1	41	sp|Q14974|IMB1_HUMAN Importin subunit beta-1 OS=Homo sapiens OX=9606 GN=KPNB1 PE=1 SV=2	22.4198	21.1934	3	3	1.22642	1.22477	0.395433	0.550867	No	No	Yes	2.75415	3.67517
Q14978	NOLC1	20	sp|Q14978|NOLC1_HUMAN Nucleolar and coiled-body phosphoprotein 1 OS=Homo sapiens OX=9606 GN=NOLC1 PE=1 SV=2	23.7787	23.4307	4	4	0.348031	0.347563	0.357252	0.525507	No	No	Yes	2.07785	3.02187
Q14980	NUMA1	91	sp|Q14980|NUMA1_HUMAN Nuclear mitotic apparatus protein 1 OS=Homo sapiens OX=9606 GN=NUMA1 PE=1 SV=2	22.9273	21.2633	4	4	1.66395	1.66171	0.0814086	0.192279	No	No	Yes	1.7326	3.25512
Q14997	PSME4	2	sp|Q14997|PSME4_HUMAN Proteasome activator complex subunit 4 OS=Homo sapiens OX=9606 GN=PSME4 PE=1 SV=2	18.2448	23.5047	0	1	-5.25988	-5.2528	3.97066e-11	6.78982e-09	No	No	Yes	1.76985	4.08492
Q15029	EFTUD2	50	sp|Q15029|U5S1_HUMAN 116 kDa U5 small nuclear ribonucleoprotein component OS=Homo sapiens OX=9606 GN=EFTUD2 PE=1 SV=1	22.8432	21.8796	4	4	0.963612	0.962316	0.126975	0.26479	No	No	Yes	1.58852	3.52026
Q15046	KARS	23	sp|Q15046|SYK_HUMAN Lysine--tRNA ligase OS=Homo sapiens OX=9606 GN=KARS1 PE=1 SV=3	18.2572	21.4073	0	1	-3.15008	-3.14585	2.43402e-08	6.86696e-07	No	No	Yes	2.03206	2.81771
Q15050	RRS1	21	sp|Q15050|RRS1_HUMAN Ribosome biogenesis regulatory protein homolog OS=Homo sapiens OX=9606 GN=RRS1 PE=1 SV=2	19.85	18.6431	3	0	1.20689	1.20527	0.0346632	0.094086	No	No	Yes	1.35255	1.38399
Q15058	KIF14	49	sp|Q15058|KIF14_HUMAN Kinesin-like protein KIF14 OS=Homo sapiens OX=9606 GN=KIF14 PE=1 SV=1	24.2878	23.9902	4	4	0.297568	0.297168	0.293314	0.465736	No	No	Yes	1.95386	3.61021
Q15154	PCM1	96	sp|Q15154|PCM1_HUMAN Pericentriolar material 1 protein OS=Homo sapiens OX=9606 GN=PCM1 PE=1 SV=5	27.6255	27.5073	4	4	0.118208	0.118049	0.487038	0.632625	No	No	Yes	2.03121	2.77782
Q15233	NONO	37	sp|Q15233|NONO_HUMAN Non-POU domain-containing octamer-binding protein OS=Homo sapiens OX=9606 GN=NONO PE=1 SV=4	26.1405	25.325	4	4	0.815483	0.814387	0.0521865	0.132697	No	No	Yes	2.65399	2.71466
Q15287	RNPS1	7	sp|Q15287|RNPS1_HUMAN RNA-binding protein with serine-rich domain 1 OS=Homo sapiens OX=9606 GN=RNPS1 PE=1 SV=1	21.5109	22.1019	3	2	-0.591015	-0.59022	0.502794	0.639239	No	No	Yes	1.60547	1.99948
Q15365	PCBP1	14	sp|Q15365|PCBP1_HUMAN Poly(rC)-binding protein 1 OS=Homo sapiens OX=9606 GN=PCBP1 PE=1 SV=2	25.5723	25.294	4	4	0.27832	0.277946	0.452784	0.602538	No	No	Yes	2.31437	3.10222
Q15366	PCBP2	12	sp|Q15366|PCBP2_HUMAN Poly(rC)-binding protein 2 OS=Homo sapiens OX=9606 GN=PCBP2 PE=1 SV=1	24.1895	23.9873	4	4	0.202136	0.201864	0.497051	0.636274	No	No	Yes	2.5118	3.19661
Q15393	SF3B3	44	sp|Q15393|SF3B3_HUMAN Splicing factor 3B subunit 3 OS=Homo sapiens OX=9606 GN=SF3B3 PE=1 SV=4	21.5516	20.9108	3	2	0.640779	0.639917	0.484736	0.631542	No	No	Yes	2.08497	3.92271
Q15424	SAFB	14	sp|Q15424|SAFB1_HUMAN Scaffold attachment factor B1 OS=Homo sapiens OX=9606 GN=SAFB PE=1 SV=4	21.4408	20.9483	3	3	0.49245	0.491788	0.650155	0.748663	No	No	Yes	1.77293	2.64756
Q15517	CDSN	7	sp|Q15517|CDSN_HUMAN Corneodesmosin OS=Homo sapiens OX=9606 GN=CDSN PE=1 SV=3	25.8075	25.6308	4	4	0.176789	0.176552	0.423855	0.578676	No	No	No		3.01976
Q15637	SF1	19	sp|Q15637|SF01_HUMAN Splicing factor 1 OS=Homo sapiens OX=9606 GN=SF1 PE=1 SV=4	23.8614	23.4482	4	4	0.413188	0.412632	0.451961	0.602538	No	No	Yes	2.14621	2.86194
Q15717	ELAVL1	18	sp|Q15717|ELAV1_HUMAN ELAV-like protein 1 OS=Homo sapiens OX=9606 GN=ELAVL1 PE=1 SV=2	20.9265	20.3127	4	3	0.613721	0.612896	0.286987	0.460795	No	No	Yes	1.95339	3.06346
Q15828	CST6	2	sp|Q15828|CYTM_HUMAN Cystatin-M OS=Homo sapiens OX=9606 GN=CST6 PE=1 SV=1	18.273	21.1848	0	1	-2.91173	-2.90782	2.53125e-09	1.33183e-07	No	No	No
Q16610	ECM1	7	sp|Q16610|ECM1_HUMAN Extracellular matrix protein 1 OS=Homo sapiens OX=9606 GN=ECM1 PE=1 SV=2	21.4504	21.4149	3	3	0.0355391	0.0354913	0.979839	0.989721	No	No	No		3.1603
Q16629	SRSF7	13	sp|Q16629|SRSF7_HUMAN Serine/arginine-rich splicing factor 7 OS=Homo sapiens OX=9606 GN=SRSF7 PE=1 SV=1	27.2894	27.0862	4	4	0.203187	0.202914	0.128184	0.266498	No	No	Yes	2.39489	1.72452
Q16739	UGCG	2	sp|Q16739|CEGT_HUMAN Ceramide glucosyltransferase OS=Homo sapiens OX=9606 GN=UGCG PE=1 SV=1	18.2926	23.3971	0	1	-5.10443	-5.09757	2.57473e-07	4.40278e-06	No	No	Yes	1.8558
Q16777	HIST2H2AC	1	sp|Q16777|H2A2C_HUMAN Histone H2A type 2-C OS=Homo sapiens OX=9606 GN=H2AC20 PE=1 SV=4;sp|Q6FI13|H2A2A_HUMAN Histone H2A type 2-A OS=Homo sapiens OX=9606 GN=H2AC18 PE=1 SV=3	29.5176	28.3572	4	4	1.16041	1.15884	0.0711178	0.174495	No	No	Yes	1.00276
Q16778	HIST2H2BE	0	sp|Q16778|H2B2E_HUMAN Histone H2B type 2-E OS=Homo sapiens OX=9606 GN=H2BC21 PE=1 SV=3;sp|P06899|H2B1J_HUMAN Histone H2B type 1-J OS=Homo sapiens OX=9606 GN=H2BC11 PE=1 SV=3	28.8731	28.1494	4	4	0.723747	0.722773	0.159502	0.309942	No	No	Yes	0.442226
Q2M1P5	KIF7	14	sp|Q2M1P5|KIF7_HUMAN Kinesin-like protein KIF7 OS=Homo sapiens OX=9606 GN=KIF7 PE=1 SV=2	23.901	23.967	4	4	-0.0659507	-0.065862	0.679422	0.774541	No	No	Yes	1.47195	3.29133
Q49A88	CCDC14	23	sp|Q49A88|CCD14_HUMAN Coiled-coil domain-containing protein 14 OS=Homo sapiens OX=9606 GN=CCDC14 PE=1 SV=3	18.2253	20.724	0	1	-2.49871	-2.49535	5.19999e-05	0.000237119	No	No	Yes	1.98708	2.34819
Q4AC94	C2CD3	7	sp|Q4AC94|C2CD3_HUMAN C2 domain-containing protein 3 OS=Homo sapiens OX=9606 GN=C2CD3 PE=1 SV=4	20.5741	18.631	1	0	1.94318	1.94057	8.93451e-05	0.000379578	No	No	Yes	0.968084	3.72351
Q4VCS5	AMOT	38	sp|Q4VCS5|AMOT_HUMAN Angiomotin OS=Homo sapiens OX=9606 GN=AMOT PE=1 SV=1	26.3593	26.2516	4	4	0.107691	0.107546	0.822037	0.891083	No	No	Yes	2.53353	3.1585
Q53EZ4	CEP55	12	sp|Q53EZ4|CEP55_HUMAN Centrosomal protein of 55 kDa OS=Homo sapiens OX=9606 GN=CEP55 PE=1 SV=3	18.2339	22.4916	0	1	-4.25776	-4.25204	5.41687e-11	7.41028e-09	No	No	Yes	1.66278	2.57137
Q562R1	ACTBL2	2	sp|Q562R1|ACTBL_HUMAN Beta-actin-like protein 2 OS=Homo sapiens OX=9606 GN=ACTBL2 PE=1 SV=2	18.2228	26.2438	0	1	-8.02102	-8.01024	2.55966e-06	2.42102e-05	No	No	No		3.20786
Q5BJF6	ODF2	46	sp|Q5BJF6|ODFP2_HUMAN Outer dense fiber protein 2 OS=Homo sapiens OX=9606 GN=ODF2 PE=1 SV=1	25.1832	25.3024	4	4	-0.119224	-0.119064	0.610081	0.718236	No	No	Yes	1.41599	2.93728
Q5BKY9	FAM133B	2	sp|Q5BKY9|F133B_HUMAN Protein FAM133B OS=Homo sapiens OX=9606 GN=FAM133B PE=1 SV=1;sp|Q8N9E0|F133A_HUMAN Protein FAM133A OS=Homo sapiens OX=9606 GN=FAM133A PE=1 SV=1	21.5386	22.5596	1	1	-1.02099	-1.01962	4.82278e-05	0.000229082	No	No	Yes	1.60876
Q5JTW2	CEP78	8	sp|Q5JTW2|CEP78_HUMAN Centrosomal protein of 78 kDa OS=Homo sapiens OX=9606 GN=CEP78 PE=1 SV=1	21.0471	21.8925	3	1	-0.845357	-0.84422	0.378467	0.540441	No	No	Yes	1.90111	2.68876
Q5SSJ5	HP1BP3	23	sp|Q5SSJ5|HP1B3_HUMAN Heterochromatin protein 1-binding protein 3 OS=Homo sapiens OX=9606 GN=HP1BP3 PE=1 SV=1	23.6391	18.6508	1	0	4.98826	4.98155	1.4641e-06	1.65417e-05	No	No	Yes	1.9826	2.81078
Q5SW79	CEP170	14	sp|Q5SW79|CE170_HUMAN Centrosomal protein of 170 kDa OS=Homo sapiens OX=9606 GN=CEP170 PE=1 SV=1	23.1492	23.2479	4	4	-0.0987014	-0.0985687	0.596927	0.711799	No	No	Yes	2.03395	3.24232
Q5T749	KPRP	29	sp|Q5T749|KPRP_HUMAN Keratinocyte proline-rich protein OS=Homo sapiens OX=9606 GN=KPRP PE=1 SV=1	27.6281	27.281	4	4	0.347087	0.34662	0.198627	0.356591	No	No	No		0.996949
Q5T750	XP32	9	sp|Q5T750|XP32_HUMAN Skin-specific protein 32 OS=Homo sapiens OX=9606 GN=XP32 PE=1 SV=1	26.1893	25.9105	4	4	0.278854	0.278479	0.276311	0.448923	No	No	No		0.735599
Q5TZA2	CROCC	9	sp|Q5TZA2|CROCC_HUMAN Rootletin OS=Homo sapiens OX=9606 GN=CROCC PE=1 SV=1	20.806	18.6584	2	0	2.1476	2.14471	0.000103889	0.000433291	Yes	Yes	Yes	0.83821	2.84367
Q5VT06	CEP350	44	sp|Q5VT06|CE350_HUMAN Centrosome-associated protein 350 OS=Homo sapiens OX=9606 GN=CEP350 PE=1 SV=1	24.8454	24.8859	4	4	-0.0405159	-0.0404614	0.70763	0.801356	No	No	Yes	2.31063	3.25352
Q5VTL8	PRPF38B	11	sp|Q5VTL8|PR38B_HUMAN Pre-mRNA-splicing factor 38B OS=Homo sapiens OX=9606 GN=PRPF38B PE=1 SV=1	22.3928	23.2789	3	4	-0.886132	-0.884941	0.491533	0.6343	No	No	Yes	2.51784	2.93713
Q66GS9	CEP135	40	sp|Q66GS9|CP135_HUMAN Centrosomal protein of 135 kDa OS=Homo sapiens OX=9606 GN=CEP135 PE=1 SV=2	25.0053	25.3134	4	4	-0.308039	-0.307625	0.256344	0.422504	No	No	Yes	1.93279	2.29319
Q66PJ3	ARL6IP4	4	sp|Q66PJ3|AR6P4_HUMAN ADP-ribosylation factor-like protein 6-interacting protein 4 OS=Homo sapiens OX=9606 GN=ARL6IP4 PE=1 SV=2	21.4196	21.4353	3	3	-0.0157082	-0.015687	0.989016	0.993373	No	No	Yes	0.809985	0.911158
Q6NSJ5	LRRC8E	3	sp|Q6NSJ5|LRC8E_HUMAN Volume-regulated anion channel subunit LRRC8E OS=Homo sapiens OX=9606 GN=LRRC8E PE=1 SV=2	18.1888	23.6085	0	1	-5.41966	-5.41238	1.32555e-07	2.74749e-06	No	No	Yes	1.1109	3.9467
Q6NYC8	PPP1R18	12	sp|Q6NYC8|PPR18_HUMAN Phostensin OS=Homo sapiens OX=9606 GN=PPP1R18 PE=1 SV=1	18.2048	20.0713	0	1	-1.86643	-1.86392	5.29552e-07	7.39212e-06	No	No	Yes	1.11415	2.56352
Q6P4A8	PLBD1	3	sp|Q6P4A8|PLBL1_HUMAN Phospholipase B-like 1 OS=Homo sapiens OX=9606 GN=PLBD1 PE=1 SV=2	18.2232	18.9043	0	1	-0.681147	-0.680231	0.000406718	0.00150376	No	No	No
Q6PJT7	ZC3H14	24	sp|Q6PJT7|ZC3HE_HUMAN Zinc finger CCCH domain-containing protein 14 OS=Homo sapiens OX=9606 GN=ZC3H14 PE=1 SV=1	21.1157	18.6183	1	0	2.4974	2.49404	4.93431e-05	0.000230192	No	No	Yes	1.92952	3.15437
Q6UB35	MTHFD1L	37	sp|Q6UB35|C1TM_HUMAN Monofunctional C1-tetrahydrofolate synthase, mitochondrial OS=Homo sapiens OX=9606 GN=MTHFD1L PE=1 SV=1	19.8131	18.6479	1	0	1.16525	1.16368	3.26268e-05	0.000165309	No	No	Yes	1.51184	3.65482
Q6UWP8	SBSN	10	sp|Q6UWP8|SBSN_HUMAN Suprabasin OS=Homo sapiens OX=9606 GN=SBSN PE=1 SV=2	21.4932	22.9969	3	1	-1.5037	-1.50168	0.232174	0.393087	No	No	No		2.77092
Q6ZU80	CEP128	49	sp|Q6ZU80|CE128_HUMAN Centrosomal protein of 128 kDa OS=Homo sapiens OX=9606 GN=CEP128 PE=1 SV=2	24.7562	25.3156	4	4	-0.559409	-0.558657	0.197234	0.355958	No	No	Yes	1.46201	2.58564
Q6ZVX7	NCCRP1	7	sp|Q6ZVX7|FBX50_HUMAN F-box only protein 50 OS=Homo sapiens OX=9606 GN=NCCRP1 PE=1 SV=1	24.7178	24.3344	4	4	0.383384	0.382869	0.533974	0.66376	No	No	No		2.61604
Q71UI9	H2AFV	4	sp|Q71UI9|H2AV_HUMAN Histone H2A.V OS=Homo sapiens OX=9606 GN=H2AZ2 PE=1 SV=3;sp|P0C0S5|H2AZ_HUMAN Histone H2A.Z OS=Homo sapiens OX=9606 GN=H2AZ1 PE=1 SV=2	24.4718	23.8355	4	2	0.636259	0.635403	0.117752	0.256302	No	No	Yes	2.29949	2.5412
Q76N32	CEP68	17	sp|Q76N32|CEP68_HUMAN Centrosomal protein of 68 kDa OS=Homo sapiens OX=9606 GN=CEP68 PE=1 SV=2	23.7848	24.0454	4	4	-0.260575	-0.260225	0.0177725	0.0530847	No	No	Yes	1.33471	2.91884
Q7KZF4	SND1	46	sp|Q7KZF4|SND1_HUMAN Staphylococcal nuclease domain-containing protein 1 OS=Homo sapiens OX=9606 GN=SND1 PE=1 SV=1	22.8936	22.3793	4	4	0.514353	0.513662	0.0727652	0.177123	No	No	Yes	1.93002	3.59736
Q7L014	DDX46	33	sp|Q7L014|DDX46_HUMAN Probable ATP-dependent RNA helicase DDX46 OS=Homo sapiens OX=9606 GN=DDX46 PE=1 SV=2	25.5611	25.5028	4	4	0.0582362	0.0581579	0.600709	0.714342	No	No	Yes	2.29042	3.56388
Q7L0Y3	TRMT10C	22	sp|Q7L0Y3|TM10C_HUMAN tRNA methyltransferase 10 homolog C OS=Homo sapiens OX=9606 GN=TRMT10C PE=1 SV=2	22.4296	21.8524	2	1	0.577201	0.576424	0.0717911	0.175375	No	No	Yes	1.67823	3.09462
Q7L2E3	DHX30	45	sp|Q7L2E3|DHX30_HUMAN ATP-dependent RNA helicase DHX30 OS=Homo sapiens OX=9606 GN=DHX30 PE=1 SV=1	21.9177	21.1885	3	1	0.729201	0.72822	0.635864	0.737171	No	No	Yes	1.75892	3.69041
Q7L4I2	RSRC2	5	sp|Q7L4I2|RSRC2_HUMAN Arginine/serine-rich coiled-coil protein 2 OS=Homo sapiens OX=9606 GN=RSRC2 PE=1 SV=1	23.2288	23.3057	4	4	-0.0768626	-0.0767592	0.581664	0.700455	No	No	Yes	2.28146	2.69677
Q7L590	MCM10	2	sp|Q7L590|MCM10_HUMAN Protein MCM10 homolog OS=Homo sapiens OX=9606 GN=MCM10 PE=1 SV=2	18.2317	22.3229	0	1	-4.09122	-4.08572	1.24968e-11	4.27392e-09	No	No	Yes	2.22865
Q7Z7A1	CNTRL	11	sp|Q7Z7A1|CNTRL_HUMAN Centriolin OS=Homo sapiens OX=9606 GN=CNTRL PE=1 SV=2	22.0607	21.6475	2	3	0.413166	0.412611	0.713803	0.80171	No	No	Yes	1.63897	3.15797
Q86T90	KIAA1328	5	sp|Q86T90|K1328_HUMAN Protein hinderin OS=Homo sapiens OX=9606 GN=KIAA1328 PE=1 SV=2	21.5193	21.2861	3	3	0.233158	0.232844	0.850526	0.917603	No	No	Yes	0.994066	2.31361
Q86UK5	EVC2	3	sp|Q86UK5|LBN_HUMAN Limbin OS=Homo sapiens OX=9606 GN=EVC2 PE=1 SV=1	20.9193	18.6672	1	0	2.25209	2.24907	0.000335156	0.0012596	No	No	No
Q86UU1	PHLDB1	2	sp|Q86UU1|PHLB1_HUMAN Pleckstrin homology-like domain family B member 1 OS=Homo sapiens OX=9606 GN=PHLDB1 PE=1 SV=1	18.2326	20.1568	0	1	-1.92423	-1.92164	6.21859e-05	0.000276202	No	No	Yes	0.960674	3.1342
Q86V81	ALYREF	12	sp|Q86V81|THOC4_HUMAN THO complex subunit 4 OS=Homo sapiens OX=9606 GN=ALYREF PE=1 SV=3	22.5324	22.5203	3	3	0.0120732	0.012057	0.994401	0.9955	No	No	Yes	1.90085	1.33041
Q86VP6	CAND1	31	sp|Q86VP6|CAND1_HUMAN Cullin-associated NEDD8-dissociated protein 1 OS=Homo sapiens OX=9606 GN=CAND1 PE=1 SV=2	19.8702	21.028	3	1	-1.15777	-1.15621	0.0397411	0.10536	No	No	Yes	2.1078	3.7703
Q86XR8	CEP57	10	sp|Q86XR8|CEP57_HUMAN Centrosomal protein of 57 kDa OS=Homo sapiens OX=9606 GN=CEP57 PE=1 SV=2	20.8022	18.6401	2	0	2.16215	2.15924	0.00018011	0.00071211	Yes	Yes	Yes	2.04418	2.71978
Q86YT6	MIB1	40	sp|Q86YT6|MIB1_HUMAN E3 ubiquitin-protein ligase MIB1 OS=Homo sapiens OX=9606 GN=MIB1 PE=1 SV=1	25.628	25.676	4	4	-0.0479972	-0.0479327	0.778626	0.860388	No	No	Yes	2.36438	3.1711
Q8IV33	KIAA0825	2	sp|Q8IV33|K0825_HUMAN Uncharacterized protein KIAA0825 OS=Homo sapiens OX=9606 GN=KIAA0825 PE=1 SV=3	18.2332	25.886	0	1	-7.6528	-7.64251	8.26087e-07	1.08662e-05	No	No	Yes	0.210128
Q8IW35	CEP97	6	sp|Q8IW35|CEP97_HUMAN Centrosomal protein of 97 kDa OS=Homo sapiens OX=9606 GN=CEP97 PE=1 SV=1	21.3836	22.0649	1	1	-0.681271	-0.680355	0.000869319	0.00306502	No	No	Yes	1.83223	3.21088
Q8IW75	SERPINA12	5	sp|Q8IW75|SPA12_HUMAN Serpin A12 OS=Homo sapiens OX=9606 GN=SERPINA12 PE=1 SV=1	22.4699	18.6448	1	0	3.82509	3.81994	8.67739e-09	3.32267e-07	No	No	No
Q8IWS0	PHF6	11	sp|Q8IWS0|PHF6_HUMAN PHD finger protein 6 OS=Homo sapiens OX=9606 GN=PHF6 PE=1 SV=1	22.8163	22.6197	2	1	0.196634	0.196369	0.123829	0.262981	No	No	Yes	2.3867	2.50826
Q8IWX8	CHERP	21	sp|Q8IWX8|CHERP_HUMAN Calcium homeostasis endoplasmic reticulum protein OS=Homo sapiens OX=9606 GN=CHERP PE=1 SV=3	25.2391	24.9391	4	4	0.299952	0.299549	0.305789	0.480827	No	No	Yes	1.80245	3.03944
Q8IYB3	SRRM1	19	sp|Q8IYB3|SRRM1_HUMAN Serine/arginine repetitive matrix protein 1 OS=Homo sapiens OX=9606 GN=SRRM1 PE=1 SV=2	24.7075	24.6828	4	4	0.0246421	0.024609	0.881771	0.934009	No	No	Yes	2.54425	2.14067
Q8IYX8	CEP57L1	4	sp|Q8IYX8|CE57L_HUMAN Centrosomal protein CEP57L1 OS=Homo sapiens OX=9606 GN=CEP57L1 PE=1 SV=1	18.3074	19.989	0	1	-1.68156	-1.6793	5.94978e-07	8.13931e-06	No	No	Yes	1.47234	2.45936
Q8N0Z3	SPICE1	5	sp|Q8N0Z3|SPICE_HUMAN Spindle and centriole-associated protein 1 OS=Homo sapiens OX=9606 GN=SPICE1 PE=1 SV=1	21.4211	18.6592	2	0	2.76184	2.75813	4.12302e-05	0.000198602	Yes	Yes	Yes	1.29667	2.53773
Q8N1F7	NUP93	35	sp|Q8N1F7|NUP93_HUMAN Nuclear pore complex protein Nup93 OS=Homo sapiens OX=9606 GN=NUP93 PE=1 SV=2	21.3897	18.6253	3	0	2.76447	2.76076	0.0312119	0.0867844	No	No	Yes	1.96925	3.77814
Q8N1G4	LRRC47	17	sp|Q8N1G4|LRC47_HUMAN Leucine-rich repeat-containing protein 47 OS=Homo sapiens OX=9606 GN=LRRC47 PE=1 SV=1	19.6506	20.1992	1	1	-0.548595	-0.547857	0.0115253	0.0364967	No	No	Yes	1.7198	2.72893
Q8N2S1	LTBP4	38	sp|Q8N2S1|LTBP4_HUMAN Latent-transforming growth factor beta-binding protein 4 OS=Homo sapiens OX=9606 GN=LTBP4 PE=1 SV=2	18.1866	19.4022	0	1	-1.21554	-1.21391	8.3793e-05	0.000358215	No	No	Yes	1.62921	2.84541
Q8N4C6	NIN	68	sp|Q8N4C6|NIN_HUMAN Ninein OS=Homo sapiens OX=9606 GN=NIN PE=1 SV=4	26.8423	27.1118	4	4	-0.269538	-0.269176	0.212597	0.372863	No	No	Yes	2.02239	3.33371
Q8N960	CEP120	19	sp|Q8N960|CE120_HUMAN Centrosomal protein of 120 kDa OS=Homo sapiens OX=9606 GN=CEP120 PE=1 SV=2	22.4558	22.9448	4	4	-0.489036	-0.488378	0.203029	0.359771	No	No	Yes	1.42736	3.58521
Q8NAV1	PRPF38A	8	sp|Q8NAV1|PR38A_HUMAN Pre-mRNA-splicing factor 38A OS=Homo sapiens OX=9606 GN=PRPF38A PE=1 SV=1	23.7381	23.5938	4	4	0.144294	0.1441	0.541299	0.669527	No	No	Yes	1.98724	2.43172
Q8NC51	SERBP1	19	sp|Q8NC51|PAIRB_HUMAN Plasminogen activator inhibitor 1 RNA-binding protein OS=Homo sapiens OX=9606 GN=SERBP1 PE=1 SV=2	25.3978	23.1875	4	3	2.21031	2.20734	0.218195	0.378795	No	No	Yes	3.05109	1.78633
Q8NE71	ABCF1	16	sp|Q8NE71|ABCF1_HUMAN ATP-binding cassette sub-family F member 1 OS=Homo sapiens OX=9606 GN=ABCF1 PE=1 SV=2	20.9314	18.6728	1	0	2.25855	2.25551	3.97667e-05	0.000192911	No	No	Yes	2.07808	3.42257
Q8NEX9	SDR9C7	3	sp|Q8NEX9|DR9C7_HUMAN Short-chain dehydrogenase/reductase family 9C member 7 OS=Homo sapiens OX=9606 GN=SDR9C7 PE=1 SV=1	20.7723	18.6193	1	0	2.15307	2.15017	2.77981e-05	0.000148546	No	No	No
Q8NFP7	NUDT10	1	sp|Q8NFP7|NUD10_HUMAN Diphosphoinositol polyphosphate phosphohydrolase 3-alpha OS=Homo sapiens OX=9606 GN=NUDT10 PE=1 SV=1;sp|Q96G61|NUD11_HUMAN Diphosphoinositol polyphosphate phosphohydrolase 3-beta OS=Homo sapiens OX=9606 GN=NUDT11 PE=1 SV=1;sp|Q9NZJ9|N	18.2277	20.813	0	1	-2.5853	-2.58182	1.69005e-08	5.52432e-07	No	No	Yes	1.43741	3.01968
Q8NFY9	KBTBD8	2	sp|Q8NFY9|KBTB8_HUMAN Kelch repeat and BTB domain-containing protein 8 OS=Homo sapiens OX=9606 GN=KBTBD8 PE=1 SV=2	18.2606	20.5945	0	1	-2.33396	-2.33082	2.75905e-06	2.51626e-05	No	No	Yes	0.566311
Q8NHH1	TTLL11	1	sp|Q8NHH1|TTL11_HUMAN Tubulin polyglutamylase TTLL11 OS=Homo sapiens OX=9606 GN=TTLL11 PE=1 SV=2	18.3065	26.8803	0	1	-8.57387	-8.56234	1.58537e-12	1.08439e-09	No	No	Yes	0.435621
Q8NI35	INADL	7	sp|Q8NI35|INADL_HUMAN InaD-like protein OS=Homo sapiens OX=9606 GN=PATJ PE=1 SV=3	22.2579	18.7191	1	0	3.53877	3.53401	2.9485e-05	0.000152238	No	No	No		3.69641
Q8NI36	WDR36	28	sp|Q8NI36|WDR36_HUMAN WD repeat-containing protein 36 OS=Homo sapiens OX=9606 GN=WDR36 PE=1 SV=1	22.3669	21.7382	4	3	0.628659	0.627814	0.552008	0.67787	No	No	Yes	1.59915	3.69157
Q8TCU4	ALMS1	26	sp|Q8TCU4|ALMS1_HUMAN Alstrom syndrome protein 1 OS=Homo sapiens OX=9606 GN=ALMS1 PE=1 SV=4	23.6027	23.8386	4	4	-0.235882	-0.235565	0.00862386	0.0276935	No	No	Yes	1.53219	3.39029
Q8TDL5	BPIFB1	5	sp|Q8TDL5|BPIB1_HUMAN BPI fold-containing family B member 1 OS=Homo sapiens OX=9606 GN=BPIFB1 PE=1 SV=1	18.2297	25.3349	0	1	-7.10515	-7.09559	2.01506e-11	4.59434e-09	No	No	No
Q8TDY2	RB1CC1	4	sp|Q8TDY2|RBCC1_HUMAN RB1-inducible coiled-coil protein 1 OS=Homo sapiens OX=9606 GN=RB1CC1 PE=1 SV=3	22.672	23.3929	1	2	-0.720871	-0.719902	0.0416196	0.109072	No	No	Yes	2.27887
Q8TE73	DNAH5	3	sp|Q8TE73|DYH5_HUMAN Dynein heavy chain 5, axonemal OS=Homo sapiens OX=9606 GN=DNAH5 PE=1 SV=3	18.2376	20.7637	0	1	-2.52607	-2.52268	1.49587e-05	8.86704e-05	No	No	No
Q8TEP8	CEP192	40	sp|Q8TEP8|CE192_HUMAN Centrosomal protein of 192 kDa OS=Homo sapiens OX=9606 GN=CEP192 PE=1 SV=3	24.7368	24.8346	4	4	-0.0977606	-0.0976291	0.35609	0.524925	No	No	Yes	1.37997	3.73408
Q8TF72	SHROOM3	2	sp|Q8TF72|SHRM3_HUMAN Protein Shroom3 OS=Homo sapiens OX=9606 GN=SHROOM3 PE=1 SV=2	18.2435	23.5912	0	1	-5.34778	-5.34059	3.73108e-07	5.80014e-06	No	No	Yes	1.08299	3.1534
Q8WUM4	PDCD6IP	32	sp|Q8WUM4|PDC6I_HUMAN Programmed cell death 6-interacting protein OS=Homo sapiens OX=9606 GN=PDCD6IP PE=1 SV=1	20.6328	21.7027	3	2	-1.0699	-1.06846	0.133372	0.271514	No	No	Yes	2.05226	3.30391
Q8WVV4	POF1B	14	sp|Q8WVV4|POF1B_HUMAN Protein POF1B OS=Homo sapiens OX=9606 GN=POF1B PE=1 SV=3	23.4143	24.134	4	4	-0.719746	-0.718779	0.24631	0.408923	No	No	No		2.35183
Q8WZ42	TTN	8	sp|Q8WZ42|TITIN_HUMAN Titin OS=Homo sapiens OX=9606 GN=TTN PE=1 SV=4	18.2423	24.1136	0	1	-5.87125	-5.86335	2.6804e-07	4.47169e-06	No	No	No
Q92499	DDX1	38	sp|Q92499|DDX1_HUMAN ATP-dependent RNA helicase DDX1 OS=Homo sapiens OX=9606 GN=DDX1 PE=1 SV=2	22.2646	21.1036	4	3	1.16103	1.15947	0.202332	0.359771	No	No	Yes	2.21932	3.34588
Q92522	H1FX	8	sp|Q92522|H1X_HUMAN Histone H1.10 OS=Homo sapiens OX=9606 GN=H1-10 PE=1 SV=1	22.7605	22.7256	4	4	0.0348682	0.0348213	0.926064	0.954685	No	No	Yes	2.09886	1.40722
Q92626	PXDN	5	sp|Q92626|PXDN_HUMAN Peroxidasin homolog OS=Homo sapiens OX=9606 GN=PXDN PE=1 SV=2	18.2183	22.5438	0	1	-4.3255	-4.31968	4.53748e-06	3.59002e-05	No	No	Yes	1.62195	3.57823
Q92817	EVPL	5	sp|Q92817|EVPL_HUMAN Envoplakin OS=Homo sapiens OX=9606 GN=EVPL PE=1 SV=3	18.2844	22.5897	0	1	-4.30535	-4.29956	5.61008e-06	4.12612e-05	No	No	No
Q92841	DDX17	31	sp|Q92841|DDX17_HUMAN Probable ATP-dependent RNA helicase DDX17 OS=Homo sapiens OX=9606 GN=DDX17 PE=1 SV=2	26.3142	26.0841	4	4	0.230107	0.229798	0.176617	0.330976	No	No	Yes	2.7279	3.25757
Q92979	EMG1	12	sp|Q92979|NEP1_HUMAN Ribosomal RNA small subunit methyltransferase NEP1 OS=Homo sapiens OX=9606 GN=EMG1 PE=1 SV=4	21.2552	21.9808	3	1	-0.725586	-0.72461	0.372535	0.535323	No	No	Yes	1.12802	3.19885
Q93077	HIST1H2AC	2	sp|Q93077|H2A1C_HUMAN Histone H2A type 1-C OS=Homo sapiens OX=9606 GN=H2AC6 PE=1 SV=3;sp|Q7L7L0|H2A3_HUMAN Histone H2A type 3 OS=Homo sapiens OX=9606 GN=H2AW PE=1 SV=3;sp|P04908|H2A1B_HUMAN Histone H2A type 1-B/E OS=Homo sapiens OX=9606 GN=H2AC4 PE=1 SV=2	23.6641	21.7678	4	3	1.89626	1.89371	0.15159	0.300008	No	No	Yes	0.625094	2.75171
Q96A72	MAGOHB	1	sp|Q96A72|MGN2_HUMAN Protein mago nashi homolog 2 OS=Homo sapiens OX=9606 GN=MAGOHB PE=1 SV=1	22.1215	22.8778	3	2	-0.756258	-0.755241	0.496957	0.636274	No	No	Yes	1.47064	2.93386
Q96AG4	LRRC59	19	sp|Q96AG4|LRC59_HUMAN Leucine-rich repeat-containing protein 59 OS=Homo sapiens OX=9606 GN=LRRC59 PE=1 SV=1	21.0025	21.4232	3	1	-0.420672	-0.420106	0.525727	0.659812	No	No	Yes	1.8177	3.09185
Q96CN7	ISOC1	11	sp|Q96CN7|ISOC1_HUMAN Isochorismatase domain-containing protein 1 OS=Homo sapiens OX=9606 GN=ISOC1 PE=1 SV=3	23.5923	23.0195	4	4	0.572753	0.571983	0.0889235	0.205166	No	No	Yes	1.74086	3.45634
Q96CT7	CCDC124	8	sp|Q96CT7|CC124_HUMAN Coiled-coil domain-containing protein 124 OS=Homo sapiens OX=9606 GN=CCDC124 PE=1 SV=1	22.3467	22.5519	4	1	-0.20512	-0.204845	0.466075	0.614249	No	No	Yes	1.11782	2.33903
Q96DA0	ZG16B	6	sp|Q96DA0|ZG16B_HUMAN Zymogen granule protein 16 homolog B OS=Homo sapiens OX=9606 GN=ZG16B PE=1 SV=3	22.2716	24.5772	1	2	-2.30562	-2.30252	0.0973016	0.221111	No	No	No		3.40863
Q96DI7	SNRNP40	14	sp|Q96DI7|SNR40_HUMAN U5 small nuclear ribonucleoprotein 40 kDa protein OS=Homo sapiens OX=9606 GN=SNRNP40 PE=1 SV=1	22.4563	18.6825	1	0	3.7738	3.76872	3.21392e-06	2.81836e-05	No	No	Yes	1.35113	3.25107
Q96DN5	TBC1D31	10	sp|Q96DN5|TBC31_HUMAN TBC1 domain family member 31 OS=Homo sapiens OX=9606 GN=TBC1D31 PE=1 SV=2	22.2713	22.347	2	1	-0.0757144	-0.0756126	0.389073	0.54646	No	No	Yes	1.57516	3.67302
Q96FQ6	S100A16	5	sp|Q96FQ6|S10AG_HUMAN Protein S100-A16 OS=Homo sapiens OX=9606 GN=S100A16 PE=1 SV=1	18.2334	21.4533	0	1	-3.21991	-3.21558	1.09123e-07	2.40774e-06	No	No	Yes	0.835795	2.8305
Q96FX8	PERP	1	sp|Q96FX8|PERP_HUMAN p53 apoptosis effector related to PMP-22 OS=Homo sapiens OX=9606 GN=PERP PE=1 SV=1	18.7219	18.5899	1	0	0.132001	0.131824	0.0206558	0.0609155	No	No	Yes	2.10695
Q96GE4	CEP95	8	sp|Q96GE4|CEP95_HUMAN Centrosomal protein of 95 kDa OS=Homo sapiens OX=9606 GN=CEP95 PE=1 SV=1	19.3957	18.6716	1	0	0.724142	0.723169	0.00447077	0.014773	No	No	Yes	1.65757	3.2104
Q96HS1	PGAM5	23	sp|Q96HS1|PGAM5_HUMAN Serine/threonine-protein phosphatase PGAM5, mitochondrial OS=Homo sapiens OX=9606 GN=PGAM5 PE=1 SV=2	24.7821	24.1819	4	4	0.600203	0.599396	0.0402962	0.10601	No	No	Yes	1.56516	3.09054
Q96I25	RBM17	16	sp|Q96I25|SPF45_HUMAN Splicing factor 45 OS=Homo sapiens OX=9606 GN=RBM17 PE=1 SV=1	21.4043	18.6107	2	0	2.79356	2.78981	3.33565e-05	0.000167764	Yes	Yes	Yes	2.33705	1.80774
Q96M89	CCDC138	3	sp|Q96M89|CC138_HUMAN Coiled-coil domain-containing protein 138 OS=Homo sapiens OX=9606 GN=CCDC138 PE=1 SV=1	21.402	18.671	1	0	2.73098	2.72731	7.59691e-05	0.000327407	No	No	Yes	1.39818	3.15642
Q96MT8	CEP63	15	sp|Q96MT8|CEP63_HUMAN Centrosomal protein of 63 kDa OS=Homo sapiens OX=9606 GN=CEP63 PE=1 SV=1	21.8814	23.1938	3	4	-1.31238	-1.31062	0.341151	0.513185	No	No	Yes	1.58242	1.42012
Q96P63	SERPINB12	20	sp|Q96P63|SPB12_HUMAN Serpin B12 OS=Homo sapiens OX=9606 GN=SERPINB12 PE=1 SV=1	26.1542	26.3325	4	4	-0.178302	-0.178062	0.161599	0.312592	No	No	No		3.31678
Q96PK6	RBM14	31	sp|Q96PK6|RBM14_HUMAN RNA-binding protein 14 OS=Homo sapiens OX=9606 GN=RBM14 PE=1 SV=2	23.7175	23.069	4	4	0.648546	0.647674	0.337257	0.509236	No	No	Yes	1.07195	2.11767
Q96Q89	KIF20B	3	sp|Q96Q89|KI20B_HUMAN Kinesin-like protein KIF20B OS=Homo sapiens OX=9606 GN=KIF20B PE=1 SV=3	18.281	20.9635	0	1	-2.68253	-2.67892	1.03372e-06	1.26262e-05	No	No	Yes	2.38123
Q96QA5	GSDMA	7	sp|Q96QA5|GSDMA_HUMAN Gasdermin-A OS=Homo sapiens OX=9606 GN=GSDMA PE=1 SV=4	23.2933	23.4053	4	4	-0.111977	-0.111827	0.579305	0.700455	No	No	No		3.15589
Q96SN8	CDK5RAP2	62	sp|Q96SN8|CK5P2_HUMAN CDK5 regulatory subunit-associated protein 2 OS=Homo sapiens OX=9606 GN=CDK5RAP2 PE=1 SV=5	26.5068	26.7284	4	4	-0.221517	-0.221219	0.107984	0.241375	No	No	Yes	1.80673	3.25473
Q96T37	RBM15	19	sp|Q96T37|RBM15_HUMAN RNA-binding protein 15 OS=Homo sapiens OX=9606 GN=RBM15 PE=1 SV=2	20.1474	18.6698	3	0	1.47756	1.47557	0.0707715	0.174495	No	No	Yes	1.61507	3.13637
Q99459	CDC5L	33	sp|Q99459|CDC5L_HUMAN Cell division cycle 5-like protein OS=Homo sapiens OX=9606 GN=CDC5L PE=1 SV=2	20.9902	18.6277	3	0	2.36243	2.35925	0.029923	0.0838826	No	No	Yes	2.13738	1.90009
Q99536	VAT1	11	sp|Q99536|VAT1_HUMAN Synaptic vesicle membrane protein VAT-1 homolog OS=Homo sapiens OX=9606 GN=VAT1 PE=1 SV=2	20.0687	18.6765	2	0	1.39216	1.39029	3.6217e-05	0.000178219	Yes	Yes	Yes	1.80849	3.38201
Q99613	EIF3C	26	sp|Q99613|EIF3C_HUMAN Eukaryotic translation initiation factor 3 subunit C OS=Homo sapiens OX=9606 GN=EIF3C PE=1 SV=1;sp|B5ME19|EIFCL_HUMAN Eukaryotic translation initiation factor 3 subunit C-like protein OS=Homo sapiens OX=9606 GN=EIF3CL PE=1 SV=1	21.8479	22.6493	3	2	-0.801453	-0.800375	0.432533	0.583949	No	No	No		3.39092
Q99661	KIF2C	19	sp|Q99661|KIF2C_HUMAN Kinesin-like protein KIF2C OS=Homo sapiens OX=9606 GN=KIF2C PE=1 SV=2	18.257	18.5141	0	1	-0.257074	-0.256729	0.00654258	0.0211091	No	No	Yes	1.59905	3.07462
Q99714	HSD17B10	17	sp|Q99714|HCD2_HUMAN 3-hydroxyacyl-CoA dehydrogenase type-2 OS=Homo sapiens OX=9606 GN=HSD17B10 PE=1 SV=3	21.1438	21.9808	3	4	-0.837018	-0.835893	0.33355	0.505368	No	No	Yes	1.51526	3.08434
Q99832	CCT7	39	sp|Q99832|TCPH_HUMAN T-complex protein 1 subunit eta OS=Homo sapiens OX=9606 GN=CCT7 PE=1 SV=2	21.1574	21.8349	3	2	-0.677494	-0.676583	0.408623	0.563504	No	No	Yes	2.12657	3.36082
Q99848	EBNA1BP2	18	sp|Q99848|EBP2_HUMAN Probable rRNA-processing protein EBP2 OS=Homo sapiens OX=9606 GN=EBNA1BP2 PE=1 SV=2	21.6981	21.5477	3	1	0.150366	0.150164	0.862758	0.925161	No	No	No		2.4735
Q99879	HIST1H2BM	1	sp|Q99879|H2B1M_HUMAN Histone H2B type 1-M OS=Homo sapiens OX=9606 GN=H2BC14 PE=1 SV=3	26.0812	18.6119	2	0	7.46923	7.45918	1.06482e-06	1.27779e-05	Yes	Yes	No		2.60275
Q99988	GDF15	15	sp|Q99988|GDF15_HUMAN Growth/differentiation factor 15 OS=Homo sapiens OX=9606 GN=GDF15 PE=1 SV=3	18.2127	21.2147	0	1	-3.00208	-2.99804	7.00244e-08	1.65161e-06	No	No	Yes	0.796677	2.92965
Q99996	AKAP9	78	sp|Q99996|AKAP9_HUMAN A-kinase anchor protein 9 OS=Homo sapiens OX=9606 GN=AKAP9 PE=1 SV=4	25.7252	25.9624	4	4	-0.237148	-0.236829	0.120792	0.259003	No	No	Yes	2.45685	3.58736
Q9BR77	CCDC77	10	sp|Q9BR77|CCD77_HUMAN Coiled-coil domain-containing protein 77 OS=Homo sapiens OX=9606 GN=CCDC77 PE=1 SV=1	18.2109	20.8979	0	1	-2.68709	-2.68348	2.14388e-06	2.15649e-05	No	No	Yes	1.36421	2.68388
Q9BU76	MMTAG2	8	sp|Q9BU76|MMTA2_HUMAN Multiple myeloma tumor-associated protein 2 OS=Homo sapiens OX=9606 GN=MMTAG2 PE=1 SV=1	21.9782	21.2136	4	3	0.764619	0.763591	0.366624	0.530908	No	No	No		2.2348
Q9BV38	WDR18	11	sp|Q9BV38|WDR18_HUMAN WD repeat-containing protein 18 OS=Homo sapiens OX=9606 GN=WDR18 PE=1 SV=2	21.8392	18.6379	1	0	3.2013	3.197	9.23263e-06	6.0144e-05	No	No	Yes	1.44973	3.47475
Q9BV73	CEP250	97	sp|Q9BV73|CP250_HUMAN Centrosome-associated protein CEP250 OS=Homo sapiens OX=9606 GN=CEP250 PE=1 SV=2	27.0297	27.3194	4	4	-0.289636	-0.289246	0.184607	0.339438	No	No	Yes	1.48759	3.24477
Q9BVP2	GNL3	21	sp|Q9BVP2|GNL3_HUMAN Guanine nucleotide-binding protein-like 3 OS=Homo sapiens OX=9606 GN=GNL3 PE=1 SV=2	22.3871	18.6217	2	0	3.76539	3.76032	1.16216e-07	2.48412e-06	Yes	Yes	Yes	2.00514	2.99015
Q9BY77	POLDIP3	14	sp|Q9BY77|PDIP3_HUMAN Polymerase delta-interacting protein 3 OS=Homo sapiens OX=9606 GN=POLDIP3 PE=1 SV=2	22.3651	21.2462	4	3	1.11884	1.11734	0.308738	0.482407	No	No	Yes	1.44148	2.61115
Q9BYJ1	ALOXE3	3	sp|Q9BYJ1|LOXE3_HUMAN Hydroperoxide isomerase ALOXE3 OS=Homo sapiens OX=9606 GN=ALOXE3 PE=1 SV=1	19.6378	18.6028	1	0	1.03493	1.03354	1.76648e-06	1.94882e-05	No	No	Yes	-0.230171	3.51444
Q9C0D2	CEP295	4	sp|Q9C0D2|CE295_HUMAN Centrosomal protein of 295 kDa OS=Homo sapiens OX=9606 GN=CEP295 PE=1 SV=4	21.0961	18.6275	1	0	2.4686	2.46528	4.86689e-05	0.000229583	No	No	Yes	1.83526	2.8992
Q9H009	NACA2	1	sp|Q9H009|NACA2_HUMAN Nascent polypeptide-associated complex subunit alpha-2 OS=Homo sapiens OX=9606 GN=NACA2 PE=1 SV=1	20.0528	18.6529	1	0	1.39992	1.39803	3.82404e-07	5.81255e-06	No	No	No
Q9H0D6	XRN2	30	sp|Q9H0D6|XRN2_HUMAN 5-3 exoribonuclease 2 OS=Homo sapiens OX=9606 GN=XRN2 PE=1 SV=1	20.1551	18.6323	1	0	1.52277	1.52072	5.8432e-05	0.000262944	No	No	Yes	2.19974	3.55554
Q9H0H5	RACGAP1	27	sp|Q9H0H5|RGAP1_HUMAN Rac GTPase-activating protein 1 OS=Homo sapiens OX=9606 GN=RACGAP1 PE=1 SV=1	22.3352	21.7439	4	3	0.591314	0.590519	0.618281	0.72168	No	No	Yes	1.3189	2.86475
Q9H1E1	RNASE7	3	sp|Q9H1E1|RNAS7_HUMAN Ribonuclease 7 OS=Homo sapiens OX=9606 GN=RNASE7 PE=1 SV=2	21.6597	18.6387	1	0	3.02107	3.017	1.6304e-05	9.49193e-05	No	No	No
Q9H307	PNN	22	sp|Q9H307|PININ_HUMAN Pinin OS=Homo sapiens OX=9606 GN=PNN PE=1 SV=5	23.6866	23.2441	4	4	0.442436	0.441841	0.112523	0.248276	No	No	Yes	2.63992	2.109
Q9H7E9	C8orf33	1	sp|Q9H7E9|CH033_HUMAN UPF0488 protein C8orf33 OS=Homo sapiens OX=9606 GN=C8orf33 PE=1 SV=1	18.8721	18.6435	1	0	0.228565	0.228258	0.116048	0.254412	No	No	Yes	1.55895
Q9H7N4	SCAF1	6	sp|Q9H7N4|SFR19_HUMAN Splicing factor, arginine/serine-rich 19 OS=Homo sapiens OX=9606 GN=SCAF1 PE=1 SV=3	20.6932	18.6221	3	0	2.07111	2.06832	0.0234935	0.0675191	No	No	Yes	0.800986	3.31807
Q9H9A6	LRRC40	14	sp|Q9H9A6|LRC40_HUMAN Leucine-rich repeat-containing protein 40 OS=Homo sapiens OX=9606 GN=LRRC40 PE=1 SV=1	21.533	21.4577	4	2	0.0752349	0.0751337	0.533819	0.66376	No	No	Yes	1.75107	3.34328
Q9HB71	CACYBP	20	sp|Q9HB71|CYBP_HUMAN Calcyclin-binding protein OS=Homo sapiens OX=9606 GN=CACYBP PE=1 SV=2	20.7312	20.1665	3	1	0.56464	0.563881	0.347929	0.517355	No	No	Yes	2.21789	2.91237
Q9HC84	MUC5B	2	sp|Q9HC84|MUC5B_HUMAN Mucin-5B OS=Homo sapiens OX=9606 GN=MUC5B PE=1 SV=3	18.2868	22.6582	0	1	-4.3714	-4.36552	7.87401e-06	5.38249e-05	No	No	No
Q9HCY8	S100A14	3	sp|Q9HCY8|S10AE_HUMAN Protein S100-A14 OS=Homo sapiens OX=9606 GN=S100A14 PE=1 SV=1	21.0462	21.3666	2	2	-0.32039	-0.319959	0.183462	0.33905	No	No	No
Q9NNW5	WDR6	9	sp|Q9NNW5|WDR6_HUMAN WD repeat-containing protein 6 OS=Homo sapiens OX=9606 GN=WDR6 PE=1 SV=1	20.2495	18.6524	2	0	1.59712	1.59497	0.000191802	0.00075398	Yes	Yes	Yes	1.55208	3.67999
Q9NP55	BPIFA1	3	sp|Q9NP55|BPIA1_HUMAN BPI fold-containing family A member 1 OS=Homo sapiens OX=9606 GN=BPIFA1 PE=1 SV=1	18.2711	22.5146	0	1	-4.24349	-4.23779	9.4177e-07	1.19291e-05	No	No	No
Q9NPD3	EXOSC4	5	sp|Q9NPD3|EXOS4_HUMAN Exosome complex component RRP41 OS=Homo sapiens OX=9606 GN=EXOSC4 PE=1 SV=3	21.0088	18.6747	2	0	2.33416	2.33102	3.93322e-07	5.84853e-06	Yes	Yes	Yes	0.931751	2.88904
Q9NQ29	LUC7L	4	sp|Q9NQ29|LUC7L_HUMAN Putative RNA-binding protein Luc7-like 1 OS=Homo sapiens OX=9606 GN=LUC7L PE=1 SV=1	21.0531	21.1185	3	1	-0.0654308	-0.0653428	0.924194	0.954685	No	No	Yes	1.72169	1.58692
Q9NR30	DDX21	49	sp|Q9NR30|DDX21_HUMAN Nucleolar RNA helicase 2 OS=Homo sapiens OX=9606 GN=DDX21 PE=1 SV=5	24.2597	21.2933	4	3	2.96632	2.96233	0.0577693	0.144212	No	No	Yes	2.80873	3.35938
Q9NT22	EMILIN3	3	sp|Q9NT22|EMIL3_HUMAN EMILIN-3 OS=Homo sapiens OX=9606 GN=EMILIN3 PE=1 SV=2	21.1476	21.7418	1	2	-0.594257	-0.593458	0.0326431	0.0896701	No	No	Yes	0.736115	2.4751
Q9NVI7	ATAD3A	11	sp|Q9NVI7|ATD3A_HUMAN ATPase family AAA domain-containing protein 3A OS=Homo sapiens OX=9606 GN=ATAD3A PE=1 SV=2	24.0183	23.7861	4	4	0.232148	0.231836	0.479195	0.62671	No	No	Yes	1.10801	3.50891
Q9NVP1	DDX18	24	sp|Q9NVP1|DDX18_HUMAN ATP-dependent RNA helicase DDX18 OS=Homo sapiens OX=9606 GN=DDX18 PE=1 SV=2	22.1037	18.6403	1	0	3.46337	3.45871	5.15825e-05	0.000236795	No	No	Yes	2.31617	3.29969
Q9NWB6	ARGLU1	6	sp|Q9NWB6|ARGL1_HUMAN Arginine and glutamate-rich protein 1 OS=Homo sapiens OX=9606 GN=ARGLU1 PE=1 SV=1	22.0361	21.944	4	2	0.0920593	0.0919355	0.531246	0.66376	No	No	Yes	2.09713
Q9NX24	NHP2	5	sp|Q9NX24|NHP2_HUMAN H/ACA ribonucleoprotein complex subunit 2 OS=Homo sapiens OX=9606 GN=NHP2 PE=1 SV=1	21.5004	18.6825	1	0	2.81783	2.81404	7.02036e-05	0.000305855	No	No	Yes	1.82978	2.62424
Q9NYF8	BCLAF1	29	sp|Q9NYF8|BCLF1_HUMAN Bcl-2-associated transcription factor 1 OS=Homo sapiens OX=9606 GN=BCLAF1 PE=1 SV=2	26.7913	26.75	4	4	0.0413141	0.0412585	0.589371	0.706007	No	No	Yes	2.37331	2.61535
Q9NZ01	TECR	11	sp|Q9NZ01|TECR_HUMAN Very-long-chain enoyl-CoA reductase OS=Homo sapiens OX=9606 GN=TECR PE=1 SV=1	21.4371	18.6997	1	0	2.73737	2.73369	3.81808e-08	9.67246e-07	No	No	Yes	0.928425	3.7841
Q9NZI8	IGF2BP1	22	sp|Q9NZI8|IF2B1_HUMAN Insulin-like growth factor 2 mRNA-binding protein 1 OS=Homo sapiens OX=9606 GN=IGF2BP1 PE=1 SV=2	23.3425	23.1855	4	4	0.15701	0.156799	0.706276	0.801356	No	No	Yes	2.04297	2.74118
Q9NZT1	CALML5	10	sp|Q9NZT1|CALL5_HUMAN Calmodulin-like protein 5 OS=Homo sapiens OX=9606 GN=CALML5 PE=1 SV=2	23.976	24.2962	4	4	-0.320226	-0.319795	0.165017	0.315683	No	No	No		1.40364
Q9P0K7	RAI14	6	sp|Q9P0K7|RAI14_HUMAN Ankycorbin OS=Homo sapiens OX=9606 GN=RAI14 PE=1 SV=2	18.2673	21.6252	0	1	-3.35794	-3.35343	1.76856e-07	3.45628e-06	No	No	Yes	1.9489	3.0696
Q9P0M6	H2AFY2	14	sp|Q9P0M6|H2AW_HUMAN Core histone macro-H2A.2 OS=Homo sapiens OX=9606 GN=MACROH2A2 PE=1 SV=3	21.0107	18.6691	1	0	2.34157	2.33842	1.39603e-05	8.37619e-05	No	No	Yes	1.75072	3.21177
Q9P209	CEP72	5	sp|Q9P209|CEP72_HUMAN Centrosomal protein of 72 kDa OS=Homo sapiens OX=9606 GN=CEP72 PE=1 SV=2	21.2591	21.2516	3	3	0.00748829	0.00747822	0.9955	0.9955	No	No	Yes	0.887969	2.06666
Q9P258	RCC2	19	sp|Q9P258|RCC2_HUMAN Protein RCC2 OS=Homo sapiens OX=9606 GN=RCC2 PE=1 SV=2	21.415	18.6687	1	0	2.74626	2.74257	0.000229703	0.000882677	No	No	Yes	2.28175	3.23672
Q9P2J5	LARS	37	sp|Q9P2J5|SYLC_HUMAN Leucine--tRNA ligase, cytoplasmic OS=Homo sapiens OX=9606 GN=LARS1 PE=1 SV=2	19.5701	18.688	1	0	0.88216	0.880974	0.000246478	0.000936615	No	No	Yes	2.26854	3.77638
Q9P2S5	WRAP73	8	sp|Q9P2S5|WRP73_HUMAN WD repeat-containing protein WRAP73 OS=Homo sapiens OX=9606 GN=WRAP73 PE=1 SV=1	20.1807	20.3911	3	3	-0.210463	-0.21018	0.803602	0.878057	No	No	Yes	1.11755	3.58006
Q9UBI6	GNG12	5	sp|Q9UBI6|GBG12_HUMAN Guanine nucleotide-binding protein G(I)/G(S)/G(O) subunit gamma-12 OS=Homo sapiens OX=9606 GN=GNG12 PE=1 SV=3	21.1111	18.6034	1	0	2.50768	2.50431	6.55251e-06	4.70457e-05	No	No	Yes	1.62701	-0.124939
Q9UGM3	DMBT1	4	sp|Q9UGM3|DMBT1_HUMAN Deleted in malignant brain tumors 1 protein OS=Homo sapiens OX=9606 GN=DMBT1 PE=1 SV=2	18.1417	24.0704	0	1	-5.92867	-5.9207	8.72259e-10	5.42386e-08	No	No	No		3.46243
Q9UHF1	EGFL7	4	sp|Q9UHF1|EGFL7_HUMAN Epidermal growth factor-like protein 7 OS=Homo sapiens OX=9606 GN=EGFL7 PE=1 SV=3	18.2366	20.4724	0	1	-2.23581	-2.2328	2.03055e-05	0.000112008	No	No	Yes	1.01802	3.05386
Q9UI42	CPA4	13	sp|Q9UI42|CBPA4_HUMAN Carboxypeptidase A4 OS=Homo sapiens OX=9606 GN=CPA4 PE=1 SV=2	20.9686	21.0544	2	1	-0.0857624	-0.0856471	0.406733	0.563169	No	No	Yes	-0.00392807	3.12743
Q9UJV9	DDX41	8	sp|Q9UJV9|DDX41_HUMAN Probable ATP-dependent RNA helicase DDX41 OS=Homo sapiens OX=9606 GN=DDX41 PE=1 SV=2	20.9368	18.658	1	0	2.2788	2.27574	9.33808e-06	6.02571e-05	No	No	Yes	1.15984	3.31435
Q9UKV3	ACIN1	34	sp|Q9UKV3|ACINU_HUMAN Apoptotic chromatin condensation inducer in the nucleus OS=Homo sapiens OX=9606 GN=ACIN1 PE=1 SV=2	19.9315	21.0967	3	1	-1.16517	-1.1636	0.0838249	0.195601	No	No	Yes	2.10707	2.45378
Q9ULV4	CORO1C	24	sp|Q9ULV4|COR1C_HUMAN Coronin-1C OS=Homo sapiens OX=9606 GN=CORO1C PE=1 SV=1	20.5802	20.7299	3	1	-0.149709	-0.149507	0.76014	0.844052	No	No	Yes	1.64145	3.32846
Q9ULW0	TPX2	19	sp|Q9ULW0|TPX2_HUMAN Targeting protein for Xklp2 OS=Homo sapiens OX=9606 GN=TPX2 PE=1 SV=2	20.3501	18.6127	2	0	1.7374	1.73506	3.24971e-07	5.16931e-06	Yes	Yes	Yes	2.14639
Q9UMS4	PRPF19	19	sp|Q9UMS4|PRP19_HUMAN Pre-mRNA-processing factor 19 OS=Homo sapiens OX=9606 GN=PRPF19 PE=1 SV=1	23.7864	21.7358	4	3	2.05055	2.04779	0.16178	0.312592	No	No	Yes	1.62508	2.99906
Q9UNX3	RPL26L1	3	sp|Q9UNX3|RL26L_HUMAN 60S ribosomal protein L26-like 1 OS=Homo sapiens OX=9606 GN=RPL26L1 PE=1 SV=1	24.5854	23.7089	4	2	0.876523	0.875345	0.293323	0.465736	No	No	Yes	1.38649	2.64378
Q9UPN4	CEP131	105	sp|Q9UPN4|CP131_HUMAN Centrosomal protein of 131 kDa OS=Homo sapiens OX=9606 GN=CEP131 PE=1 SV=3	27.5019	27.3052	4	4	0.19674	0.196475	0.410358	0.564759	No	No	Yes	0.948648	2.54244
Q9UQ35	SRRM2	67	sp|Q9UQ35|SRRM2_HUMAN Serine/arginine repetitive matrix protein 2 OS=Homo sapiens OX=9606 GN=SRRM2 PE=1 SV=2	27.4	27.3061	4	4	0.0938977	0.0937715	0.647288	0.74691	No	No	Yes	2.54257	2.77765
Q9UQ80	PA2G4	28	sp|Q9UQ80|PA2G4_HUMAN Proliferation-associated protein 2G4 OS=Homo sapiens OX=9606 GN=PA2G4 PE=1 SV=3	22.1716	22.1881	4	1	-0.016459	-0.0164368	0.911144	0.94571	No	No	Yes	2.48761	2.7371
Q9Y230	RUVBL2	28	sp|Q9Y230|RUVB2_HUMAN RuvB-like 2 OS=Homo sapiens OX=9606 GN=RUVBL2 PE=1 SV=3	20.8385	20.8644	3	1	-0.0258957	-0.0258608	0.967506	0.98625	No	No	Yes	1.20847	3.31677
Q9Y262	EIF3L	23	sp|Q9Y262|EIF3L_HUMAN Eukaryotic translation initiation factor 3 subunit L OS=Homo sapiens OX=9606 GN=EIF3L PE=1 SV=1	21.4352	21.3156	3	1	0.119565	0.119404	0.88497	0.934009	No	No	Yes	0.095932	3.61594
Q9Y265	RUVBL1	20	sp|Q9Y265|RUVB1_HUMAN RuvB-like 1 OS=Homo sapiens OX=9606 GN=RUVBL1 PE=1 SV=1	20.9953	21.7222	3	2	-0.72689	-0.725913	0.309637	0.482442	No	No	Yes	1.86966	3.04065
Q9Y295	DRG1	11	sp|Q9Y295|DRG1_HUMAN Developmentally-regulated GTP-binding protein 1 OS=Homo sapiens OX=9606 GN=DRG1 PE=1 SV=1	21.266	21.4891	1	1	-0.223095	-0.222795	0.0850648	0.197235	No	No	Yes	1.58217	3.19573
Q9Y2D8	SSX2IP	15	sp|Q9Y2D8|ADIP_HUMAN Afadin- and alpha-actinin-binding protein OS=Homo sapiens OX=9606 GN=SSX2IP PE=1 SV=3	21.8094	21.6291	1	1	0.180304	0.180061	0.158586	0.309039	No	No	Yes	1.76607	2.91158
Q9Y2W1	THRAP3	30	sp|Q9Y2W1|TR150_HUMAN Thyroid hormone receptor-associated protein 3 OS=Homo sapiens OX=9606 GN=THRAP3 PE=1 SV=2	25.7133	25.571	4	4	0.142316	0.142124	0.300126	0.4752	No	No	Yes	2.34218	2.6442
Q9Y2X3	NOP58	21	sp|Q9Y2X3|NOP58_HUMAN Nucleolar protein 58 OS=Homo sapiens OX=9606 GN=NOP58 PE=1 SV=1	20.2569	18.6263	1	0	1.63067	1.62848	9.2632e-05	0.000391113	No	No	Yes	2.41793	3.30879
Q9Y337	KLK5	2	sp|Q9Y337|KLK5_HUMAN Kallikrein-5 OS=Homo sapiens OX=9606 GN=KLK5 PE=1 SV=3	20.8039	18.6329	1	0	2.17099	2.16807	4.05308e-06	3.32634e-05	No	No	No
Q9Y383	LUC7L2	9	sp|Q9Y383|LC7L2_HUMAN Putative RNA-binding protein Luc7-like 2 OS=Homo sapiens OX=9606 GN=LUC7L2 PE=1 SV=2	25.4795	25.3676	4	4	0.111898	0.111747	0.580399	0.700455	No	No	Yes	2.06435	0.649335
Q9Y3B9	RRP15	5	sp|Q9Y3B9|RRP15_HUMAN RRP15-like protein OS=Homo sapiens OX=9606 GN=RRP15 PE=1 SV=2	21.9051	18.6765	2	0	3.22861	3.22427	0.000159055	0.000636218	Yes	Yes	Yes	1.88199	2.6541
Q9Y3I0	RTCB	28	sp|Q9Y3I0|RTCB_HUMAN RNA-splicing ligase RtcB homolog OS=Homo sapiens OX=9606 GN=RTCB PE=1 SV=1	22.3535	22.3164	4	4	0.0371771	0.0371271	0.895874	0.938404	No	No	Yes	1.57959	2.48214
Q9Y3T9	NOC2L	22	sp|Q9Y3T9|NOC2L_HUMAN Nucleolar complex protein 2 homolog OS=Homo sapiens OX=9606 GN=NOC2L PE=1 SV=4	21.327	18.6606	2	0	2.66643	2.66284	2.05266e-05	0.000112321	Yes	Yes	Yes	1.52665	3.68959
Q9Y3U8	RPL36	5	sp|Q9Y3U8|RL36_HUMAN 60S ribosomal protein L36 OS=Homo sapiens OX=9606 GN=RPL36 PE=1 SV=3	23.9458	23.7311	4	4	0.214703	0.214415	0.333956	0.505368	No	No	Yes	2.64577	0.905796
Q9Y3Y2	CHTOP	7	sp|Q9Y3Y2|CHTOP_HUMAN Chromatin target of PRMT1 protein OS=Homo sapiens OX=9606 GN=CHTOP PE=1 SV=2	23.0208	22.787	4	1	0.233776	0.233462	0.215522	0.377026	No	No	Yes	2.06105	-0.187087
Q9Y490	TLN1	98	sp|Q9Y490|TLN1_HUMAN Talin-1 OS=Homo sapiens OX=9606 GN=TLN1 PE=1 SV=3	20.7227	21.0243	3	1	-0.301631	-0.301225	0.614634	0.721114	No	No	Yes	1.9291	3.64885
Q9Y5B9	SUPT16H	45	sp|Q9Y5B9|SP16H_HUMAN FACT complex subunit SPT16 OS=Homo sapiens OX=9606 GN=SUPT16H PE=1 SV=1	23.5087	22.6286	4	4	0.880067	0.878884	0.271568	0.443323	No	No	Yes	2.49349	3.63146
Q9Y5S9	RBM8A	8	sp|Q9Y5S9|RBM8A_HUMAN RNA-binding protein 8A OS=Homo sapiens OX=9606 GN=RBM8A PE=1 SV=1	21.9438	18.6548	3	0	3.28895	3.28453	0.0366995	0.098441	No	No	Yes	2.23789	2.76723

## Sheet: HEK293T - CPT v. DMSO - INS
Protein.ID	Gene.name	Peptide.counts..unique.	Fasta.headers	avg.Case.log.intensity	avg.Control.log.intensity	avg.Case.num.reps	avg.Control.num.reps	log2foldChange	log2foldChange.adjusted	p.value	p.adjust.value	Significant	Significant.adjusted	Identified in ctrl RNAseq?	log10(CPMs ctrl)	TANGO
A6NHL2	TUBAL3	1	sp|A6NHL2|TBAL3_HUMAN Tubulin alpha chain-like 3 OS=Homo sapiens OX=9606 GN=TUBAL3 PE=1 SV=2	16.6766	17.7183	0	1	-1.04162	-1.13921	0.00056311	0.00156809	No	No	No		2.9385
A8K2U0	A2ML1	3	sp|A8K2U0|A2ML1_HUMAN Alpha-2-macroglobulin-like protein 1 OS=Homo sapiens OX=9606 GN=A2ML1 PE=1 SV=3	16.6862	17.3058	0	1	-0.619617	-0.677666	0.000826164	0.00191087	No	No	No		3.93323
E9PAV3	NACA	8	sp|E9PAV3|NACAM_HUMAN Nascent polypeptide-associated complex subunit alpha, muscle-specific form OS=Homo sapiens OX=9606 GN=NACA PE=1 SV=1;sp|Q13765|NACA_HUMAN Nascent polypeptide-associated complex subunit alpha OS=Homo sapiens OX=9606 GN=NACA PE=1 SV=1	20.5099	20.1019	4	4	0.407989	0.446212	0.498627	0.571938	No	No	No		3.24945
O00139	KIF2A	21	sp|O00139|KIF2A_HUMAN Kinesin-like protein KIF2A OS=Homo sapiens OX=9606 GN=KIF2A PE=1 SV=3	18.545	21.7623	2	1	-3.21725	-3.51866	6.5038e-05	0.00117234	No	No	Yes	2.00176	3.19399
O00148	DDX39A	14	sp|O00148|DX39A_HUMAN ATP-dependent RNA helicase DDX39A OS=Homo sapiens OX=9606 GN=DDX39A PE=1 SV=2	20.3857	16.2085	1	0	4.17714	4.56848	0.000192745	0.00117234	No	No	Yes	1.51077	3.52337
O00154	ACOT7	12	sp|O00154|BACH_HUMAN Cytosolic acyl coenzyme A thioester hydrolase OS=Homo sapiens OX=9606 GN=ACOT7 PE=1 SV=3	19.7221	16.1773	1	0	3.54477	3.87686	0.000546436	0.00155755	No	No	Yes	1.27192	2.91941
O00159	MYO1C	50	sp|O00159|MYO1C_HUMAN Unconventional myosin-Ic OS=Homo sapiens OX=9606 GN=MYO1C PE=1 SV=4	16.7307	19.8427	0	1	-3.11201	-3.40355	0.000764252	0.00183682	No	No	Yes	1.54692	3.62468
O00217	NDUFS8	8	sp|O00217|NDUS8_HUMAN NADH dehydrogenase [ubiquinone] iron-sulfur protein 8, mitochondrial OS=Homo sapiens OX=9606 GN=NDUFS8 PE=1 SV=1	19.4247	16.1548	1	0	3.26994	3.57629	0.000575937	0.00158141	No	No	Yes	1.80187	2.5692
O00264	PGRMC1	14	sp|O00264|PGRC1_HUMAN Membrane-associated progesterone receptor component 1 OS=Homo sapiens OX=9606 GN=PGRMC1 PE=1 SV=3	22.5549	16.1524	1	0	6.4025	7.00232	0.000111213	0.00117234	No	No	Yes	2.53326	3.11806
O00299	CLIC1	14	sp|O00299|CLIC1_HUMAN Chloride intracellular channel protein 1 OS=Homo sapiens OX=9606 GN=CLIC1 PE=1 SV=4	20.6466	16.1512	2	0	4.49536	4.9165	0.000742685	0.00183077	Yes	Yes	Yes	1.40116	2.989
O00303	EIF3F	15	sp|O00303|EIF3F_HUMAN Eukaryotic translation initiation factor 3 subunit F OS=Homo sapiens OX=9606 GN=EIF3F PE=1 SV=1	19.5281	16.1576	1	0	3.37047	3.68623	0.000808893	0.00189197	No	No	Yes	1.83601	3.26479
O00410	IPO5	45	sp|O00410|IPO5_HUMAN Importin-5 OS=Homo sapiens OX=9606 GN=IPO5 PE=1 SV=4	21.1397	21.1975	1	1	-0.0578416	-0.0632605	0.890914	0.914164	No	No	Yes	2.4179	3.73551
O00479	HMGN4	4	sp|O00479|HMGN4_HUMAN High mobility group nucleosome-binding domain-containing protein 4 OS=Homo sapiens OX=9606 GN=HMGN4 PE=1 SV=3	16.6622	20.4379	0	2	-3.77567	-4.1294	0.000141769	0.00117234	Yes	Yes	Yes	0.608414
O00541	PES1	23	sp|O00541|PESC_HUMAN Pescadillo homolog OS=Homo sapiens OX=9606 GN=PES1 PE=1 SV=1	16.7062	19.9547	0	1	-3.24847	-3.5528	6.90183e-05	0.00117234	No	No	Yes	1.31024	3.35387
O00567	NOP56	39	sp|O00567|NOP56_HUMAN Nucleolar protein 56 OS=Homo sapiens OX=9606 GN=NOP56 PE=1 SV=4	21.6405	23.2089	2	1	-1.5684	-1.71533	0.00904689	0.0155746	No	No	Yes	2.36668	3.12469
O00571	DDX3X	53	sp|O00571|DDX3X_HUMAN ATP-dependent RNA helicase DDX3X OS=Homo sapiens OX=9606 GN=DDX3X PE=1 SV=3;sp|O15523|DDX3Y_HUMAN ATP-dependent RNA helicase DDX3Y OS=Homo sapiens OX=9606 GN=DDX3Y PE=1 SV=2	23.0938	22.8655	4	4	0.228319	0.249709	0.689008	0.746742	No	No	Yes	2.28848	3.30033
O14578	CIT	82	sp|O14578|CTRO_HUMAN Citron Rho-interacting kinase OS=Homo sapiens OX=9606 GN=CIT PE=1 SV=2	16.7404	21.8268	0	2	-5.08642	-5.56294	5.47415e-06	0.000838624	Yes	Yes	Yes	1.30777	3.63315
O14654	IRS4	26	sp|O14654|IRS4_HUMAN Insulin receptor substrate 4 OS=Homo sapiens OX=9606 GN=IRS4 PE=1 SV=1	16.7266	21.1348	0	2	-4.40824	-4.82123	0.00116073	0.00242251	Yes	Yes	Yes	1.54034	3.57612
O14744	PRMT5	17	sp|O14744|ANM5_HUMAN Protein arginine N-methyltransferase 5 OS=Homo sapiens OX=9606 GN=PRMT5 PE=1 SV=4	20.331	16.1385	1	0	4.19252	4.5853	0.000808364	0.00189197	No	No	Yes	1.79461	3.09984
O14818	PSMA7	14	sp|O14818|PSA7_HUMAN Proteasome subunit alpha type-7 OS=Homo sapiens OX=9606 GN=PSMA7 PE=1 SV=1	22.4895	16.1969	1	0	6.29262	6.88215	0.000339758	0.00132675	No	No	Yes	2.55677	3.3569
O14880	MGST3	7	sp|O14880|MGST3_HUMAN Microsomal glutathione S-transferase 3 OS=Homo sapiens OX=9606 GN=MGST3 PE=1 SV=1	19.5318	16.2308	1	0	3.30102	3.61028	0.000603272	0.00162026	No	No	Yes	2.09193	3.57058
O14929	HAT1	11	sp|O14929|HAT1_HUMAN Histone acetyltransferase type B catalytic subunit OS=Homo sapiens OX=9606 GN=HAT1 PE=1 SV=1	20.0893	16.1845	1	0	3.90474	4.27056	0.000531262	0.00154503	No	No	Yes	1.71005	3.60438
O14979	HNRNPDL	21	sp|O14979|HNRDL_HUMAN Heterogeneous nuclear ribonucleoprotein D-like OS=Homo sapiens OX=9606 GN=HNRNPDL PE=1 SV=3	20.1619	16.1353	2	0	4.02664	4.40387	0.000484658	0.00146882	Yes	Yes	Yes	2.6941	3.0304
O14980	XPO1	37	sp|O14980|XPO1_HUMAN Exportin-1 OS=Homo sapiens OX=9606 GN=XPO1 PE=1 SV=1	19.3917	21.015	3	1	-1.62328	-1.77536	0.127012	0.172687	No	No	Yes	2.12857	4.00243
O15042	U2SURP	40	sp|O15042|SR140_HUMAN U2 snRNP-associated SURP motif-containing protein OS=Homo sapiens OX=9606 GN=U2SURP PE=1 SV=2	20.133	21.9619	2	1	-1.82883	-2.00017	0.00035661	0.00135871	No	No	Yes	2.62325	3.18502
O15067	PFAS	40	sp|O15067|PUR4_HUMAN Phosphoribosylformylglycinamidine synthase OS=Homo sapiens OX=9606 GN=PFAS PE=1 SV=4	20.5031	16.2159	1	0	4.28723	4.68888	0.000449925	0.00143553	No	No	Yes	1.47471	3.73877
O15078	CEP290	50	sp|O15078|CE290_HUMAN Centrosomal protein of 290 kDa OS=Homo sapiens OX=9606 GN=CEP290 PE=1 SV=2	16.753	21.5686	0	2	-4.81564	-5.26679	0.00529142	0.00949173	Yes	Yes	Yes	2.29879	2.99136
O15355	PPM1G	20	sp|O15355|PPM1G_HUMAN Protein phosphatase 1G OS=Homo sapiens OX=9606 GN=PPM1G PE=1 SV=1	20.7922	16.1766	1	0	4.61564	5.04805	0.000407333	0.00140801	No	No	Yes	2.32804	3.16464
O15371	EIF3D	24	sp|O15371|EIF3D_HUMAN Eukaryotic translation initiation factor 3 subunit D OS=Homo sapiens OX=9606 GN=EIF3D PE=1 SV=1	19.774	19.7112	1	1	0.0628244	0.0687101	0.821295	0.857952	No	No	Yes	2.34665	2.66977
O15372	EIF3H	14	sp|O15372|EIF3H_HUMAN Eukaryotic translation initiation factor 3 subunit H OS=Homo sapiens OX=9606 GN=EIF3H PE=1 SV=1	20.2393	16.1578	1	0	4.08149	4.46386	0.000848506	0.00193074	No	No	Yes	2.03751	3.23138
O43143	DHX15	40	sp|O43143|DHX15_HUMAN Pre-mRNA-splicing factor ATP-dependent RNA helicase DHX15 OS=Homo sapiens OX=9606 GN=DHX15 PE=1 SV=2	21.884	21.5222	1	2	0.361862	0.395763	0.607175	0.67441	No	No	Yes	1.76188	3.61435
O43169	CYB5B	5	sp|O43169|CYB5B_HUMAN Cytochrome b5 type B OS=Homo sapiens OX=9606 GN=CYB5B PE=1 SV=3	21.4522	16.1551	1	0	5.29705	5.79331	0.000319829	0.00131525	No	No	Yes	1.5106	3.25886
O43175	PHGDH	35	sp|O43175|SERA_HUMAN D-3-phosphoglycerate dehydrogenase OS=Homo sapiens OX=9606 GN=PHGDH PE=1 SV=4	23.2388	20.4773	4	3	2.7615	3.02021	0.138326	0.186011	No	No	Yes	2.47765	3.07683
O43242	PSMD3	25	sp|O43242|PSMD3_HUMAN 26S proteasome non-ATPase regulatory subunit 3 OS=Homo sapiens OX=9606 GN=PSMD3 PE=1 SV=2	20.506	16.1981	1	0	4.30791	4.7115	0.0011957	0.0024797	No	No	Yes	1.84562	3.34912
O43303	CCP110	12	sp|O43303|CP110_HUMAN Centriolar coiled-coil protein of 110 kDa OS=Homo sapiens OX=9606 GN=CCP110 PE=1 SV=3	16.7501	21.646	0	1	-4.89594	-5.35461	8.01486e-05	0.00117234	No	No	Yes	1.85105	2.84097
O43390	HNRNPR	36	sp|O43390|HNRPR_HUMAN Heterogeneous nuclear ribonucleoprotein R OS=Homo sapiens OX=9606 GN=HNRNPR PE=1 SV=1	21.6306	21.523	4	1	0.107669	0.117756	0.860866	0.891708	No	No	Yes	2.537	3.04071
O43548	TGM5	3	sp|O43548|TGM5_HUMAN Protein-glutamine gamma-glutamyltransferase 5 OS=Homo sapiens OX=9606 GN=TGM5 PE=1 SV=4	16.6494	16.4961	0	1	0.153272	0.167632	0.291106	0.358593	No	No	No		3.72936
O43615	TIMM44	25	sp|O43615|TIM44_HUMAN Mitochondrial import inner membrane translocase subunit TIM44 OS=Homo sapiens OX=9606 GN=TIMM44 PE=1 SV=2	20.0768	16.1599	2	0	3.91682	4.28377	0.000440406	0.00143331	Yes	Yes	Yes	1.70655	3.35227
O43660	PLRG1	21	sp|O43660|PLRG1_HUMAN Pleiotropic regulator 1 OS=Homo sapiens OX=9606 GN=PLRG1 PE=1 SV=1	19.0281	19.5591	1	1	-0.531046	-0.580796	0.170709	0.224942	No	No	Yes	1.69482	2.58574
O43684	BUB3	14	sp|O43684|BUB3_HUMAN Mitotic checkpoint protein BUB3 OS=Homo sapiens OX=9606 GN=BUB3 PE=1 SV=1	20.2574	20.1352	1	1	0.122181	0.133628	0.681361	0.745025	No	No	Yes	2.40374	2.76958
O43707	ACTN4	51	sp|O43707|ACTN4_HUMAN Alpha-actinin-4 OS=Homo sapiens OX=9606 GN=ACTN4 PE=1 SV=2	24.3552	16.1659	1	0	8.18926	8.95647	9.48972e-05	0.00117234	No	No	Yes	2.0495	3.50468
O43719	HTATSF1	15	sp|O43719|HTSF1_HUMAN HIV Tat-specific factor 1 OS=Homo sapiens OX=9606 GN=HTATSF1 PE=1 SV=1	18.8628	16.1684	1	0	2.69445	2.94688	0.000586573	0.00160163	No	No	Yes	2.34597	2.06948
O43823	AKAP8	5	sp|O43823|AKAP8_HUMAN A-kinase anchor protein 8 OS=Homo sapiens OX=9606 GN=AKAP8 PE=1 SV=1	16.7133	18.554	0	1	-1.84072	-2.01317	0.000434632	0.00143331	No	No	Yes	1.52614	2.55219
O43837	IDH3B	20	sp|O43837|IDH3B_HUMAN Isocitrate dehydrogenase [NAD] subunit beta, mitochondrial OS=Homo sapiens OX=9606 GN=IDH3B PE=1 SV=2	19.5015	16.1849	3	0	3.31654	3.62725	0.0317954	0.0500879	No	No	Yes	1.52262	2.1994
O43852	CALU	16	sp|O43852|CALU_HUMAN Calumenin OS=Homo sapiens OX=9606 GN=CALU PE=1 SV=2	19.0359	16.1751	1	0	2.86084	3.12886	0.00233496	0.00442248	No	No	Yes	2.36312	2.66107
O60264	SMARCA5	34	sp|O60264|SMCA5_HUMAN SWI/SNF-related matrix-associated actin-dependent regulator of chromatin subfamily A member 5 OS=Homo sapiens OX=9606 GN=SMARCA5 PE=1 SV=1	21.1257	20.0436	1	1	1.08215	1.18353	0.0199842	0.0329605	No	No	Yes	2.33762	3.441
O60293	ZFC3H1	2	sp|O60293|ZC3H1_HUMAN Zinc finger C3H1 domain-containing protein OS=Homo sapiens OX=9606 GN=ZFC3H1 PE=1 SV=3	21.6837	16.163	1	0	5.5207	6.03791	0.00013755	0.00117234	No	No	Yes	1.74523	3.89031
O60437	PPL	10	sp|O60437|PEPL_HUMAN Periplakin OS=Homo sapiens OX=9606 GN=PPL PE=1 SV=4	16.677	20.853	0	1	-4.17601	-4.56723	6.97187e-05	0.00117234	No	No	Yes	-1.18151	3.27224
O60506	SYNCRIP	33	sp|O60506|HNRPQ_HUMAN Heterogeneous nuclear ribonucleoprotein Q OS=Homo sapiens OX=9606 GN=SYNCRIP PE=1 SV=2	23.0436	16.2078	1	0	6.83579	7.4762	4.31466e-05	0.00117234	No	No	Yes	2.45593	2.99872
O60814	HIST1H2BK	0	sp|O60814|H2B1K_HUMAN Histone H2B type 1-K OS=Homo sapiens OX=9606 GN=H2BC12 PE=1 SV=3;sp|P57053|H2BFS_HUMAN Histone H2B type F-S OS=Homo sapiens OX=9606 GN=H2BS1 PE=1 SV=2	20.2823	20.2494	2	1	0.0329514	0.0360384	0.928557	0.943501	No	No	Yes	0.057324	2.60275
O60832	DKC1	26	sp|O60832|DKC1_HUMAN H/ACA ribonucleoprotein complex subunit DKC1 OS=Homo sapiens OX=9606 GN=DKC1 PE=1 SV=3	19.9586	22.0552	1	1	-2.09666	-2.29309	0.00151459	0.00303226	No	No	Yes	2.44379	3.53077
O60841	EIF5B	45	sp|O60841|IF2P_HUMAN Eukaryotic translation initiation factor 5B OS=Homo sapiens OX=9606 GN=EIF5B PE=1 SV=4	19.6776	21.2984	2	1	-1.62081	-1.77265	0.00124402	0.00255831	No	No	Yes	2.75051	3.55413
O60884	DNAJA2	19	sp|O60884|DNJA2_HUMAN DnaJ homolog subfamily A member 2 OS=Homo sapiens OX=9606 GN=DNAJA2 PE=1 SV=1	19.6106	16.1765	1	0	3.43416	3.75589	0.000347053	0.00133271	No	No	No		2.74364
O75083	WDR1	23	sp|O75083|WDR1_HUMAN WD repeat-containing protein 1 OS=Homo sapiens OX=9606 GN=WDR1 PE=1 SV=4	21.5964	16.1801	1	0	5.41634	5.92377	0.000508036	0.00150213	No	No	Yes	1.59487	3.58886
O75131	CPNE3	18	sp|O75131|CPNE3_HUMAN Copine-3 OS=Homo sapiens OX=9606 GN=CPNE3 PE=1 SV=1	20.4688	19.6608	4	4	0.808082	0.883786	0.0520661	0.0779848	No	No	Yes	1.92699	3.62885
O75342	ALOX12B	11	sp|O75342|LX12B_HUMAN Arachidonate 12-lipoxygenase, 12R-type OS=Homo sapiens OX=9606 GN=ALOX12B PE=1 SV=1	20.3336	19.77	2	3	0.563583	0.616382	0.585499	0.653286	No	No	No		3.45791
O75367	H2AFY	22	sp|O75367|H2AY_HUMAN Core histone macro-H2A.1 OS=Homo sapiens OX=9606 GN=MACROH2A1 PE=1 SV=4	21.7997	19.9067	2	3	1.89305	2.0704	0.295847	0.363977	No	No	Yes	2.17279	3.22564
O75369	FLNB	113	sp|O75369|FLNB_HUMAN Filamin-B OS=Homo sapiens OX=9606 GN=FLNB PE=1 SV=2	21.3487	16.1567	1	0	5.19205	5.67846	0.000814363	0.00189248	No	No	Yes	1.67914	3.92708
O75390	CS	25	sp|O75390|CISY_HUMAN Citrate synthase, mitochondrial OS=Homo sapiens OX=9606 GN=CS PE=1 SV=2	21.9235	18.9261	4	1	2.99734	3.27814	0.00398666	0.00731733	Yes	Yes	Yes	1.89059	3.43159
O75400	PRPF40A	29	sp|O75400|PR40A_HUMAN Pre-mRNA-processing factor 40 homolog A OS=Homo sapiens OX=9606 GN=PRPF40A PE=1 SV=2	20.001	16.2183	1	0	3.7827	4.13708	0.000711107	0.00178777	No	No	Yes	2.69499	3.32802
O75475	PSIP1	25	sp|O75475|PSIP1_HUMAN PC4 and SFRS1-interacting protein OS=Homo sapiens OX=9606 GN=PSIP1 PE=1 SV=1	21.0852	20.2447	1	1	0.840517	0.919261	0.0597375	0.0877757	No	No	Yes	2.46328	2.86584
O75489	NDUFS3	14	sp|O75489|NDUS3_HUMAN NADH dehydrogenase [ubiquinone] iron-sulfur protein 3, mitochondrial OS=Homo sapiens OX=9606 GN=NDUFS3 PE=1 SV=1	20.0389	16.1754	1	0	3.86345	4.22539	0.000286165	0.00127935	No	No	Yes	2.01669	3.15465
O75494	SRSF10	11	sp|O75494|SRS10_HUMAN Serine/arginine-rich splicing factor 10 OS=Homo sapiens OX=9606 GN=SRSF10 PE=1 SV=1	21.9647	20.5788	1	4	1.38594	1.51578	0.0626025	0.0914387	No	No	Yes	2.20693	2.09663
O75533	SF3B1	71	sp|O75533|SF3B1_HUMAN Splicing factor 3B subunit 1 OS=Homo sapiens OX=9606 GN=SF3B1 PE=1 SV=3	21.879	21.4386	1	1	0.440448	0.481712	0.260212	0.323783	No	No	Yes	2.2727	3.74126
O75534	CSDE1	32	sp|O75534|CSDE1_HUMAN Cold shock domain-containing protein E1 OS=Homo sapiens OX=9606 GN=CSDE1 PE=1 SV=2	19.925	16.1481	1	0	3.77693	4.13077	0.000884373	0.00198027	No	No	Yes	2.95516	3.24895
O75607	NPM3	4	sp|O75607|NPM3_HUMAN Nucleoplasmin-3 OS=Homo sapiens OX=9606 GN=NPM3 PE=1 SV=3	20.9444	16.1875	1	0	4.75693	5.20258	0.000339609	0.00132675	No	No	Yes	2.20474	2.90876
O75643	SNRNP200	110	sp|O75643|U520_HUMAN U5 small nuclear ribonucleoprotein 200 kDa helicase OS=Homo sapiens OX=9606 GN=SNRNP200 PE=1 SV=2	20.2809	19.8262	2	2	0.454722	0.497323	0.67079	0.738394	No	No	Yes	2.18692	4.11775
O75665	OFD1	34	sp|O75665|OFD1_HUMAN Oral-facial-digital syndrome 1 protein OS=Homo sapiens OX=9606 GN=OFD1 PE=1 SV=1	16.7484	21.001	0	2	-4.25259	-4.65099	0.00235035	0.00444306	Yes	Yes	Yes	1.769	2.1119
O75821	EIF3G	15	sp|O75821|EIF3G_HUMAN Eukaryotic translation initiation factor 3 subunit G OS=Homo sapiens OX=9606 GN=EIF3G PE=1 SV=2	21.2817	18.9409	1	1	2.34078	2.56008	5.37853e-05	0.00117234	No	No	Yes	1.85278	2.48032
O76003	GLRX3	18	sp|O76003|GLRX3_HUMAN Glutaredoxin-3 OS=Homo sapiens OX=9606 GN=GLRX3 PE=1 SV=2	20.0399	16.1361	1	0	3.90379	4.26951	0.000162206	0.00117234	No	No	Yes	1.7116	2.86442
O76021	RSL1D1	37	sp|O76021|RL1D1_HUMAN Ribosomal L1 domain-containing protein 1 OS=Homo sapiens OX=9606 GN=RSL1D1 PE=1 SV=3	21.3673	21.2316	1	2	0.135716	0.148431	0.724864	0.777035	No	No	Yes	2.4107	3.13179
O76031	CLPX	19	sp|O76031|CLPX_HUMAN ATP-dependent Clp protease ATP-binding subunit clpX-like, mitochondrial OS=Homo sapiens OX=9606 GN=CLPX PE=1 SV=2	19.7176	16.1791	1	0	3.53845	3.86994	0.000651463	0.00168523	No	No	Yes	1.56549	3.21575
O76094	SRP72	30	sp|O76094|SRP72_HUMAN Signal recognition particle subunit SRP72 OS=Homo sapiens OX=9606 GN=SRP72 PE=1 SV=3	23.2452	22.0815	1	1	1.16367	1.27268	0.0256672	0.0417038	No	No	Yes	2.53433	3.32521
O94826	TOMM70A	34	sp|O94826|TOM70_HUMAN Mitochondrial import receptor subunit TOM70 OS=Homo sapiens OX=9606 GN=TOMM70 PE=1 SV=1	19.8345	16.1366	1	0	3.69793	4.04437	0.00145187	0.00292456	No	No	No		3.18697
O94906	PRPF6	34	sp|O94906|PRP6_HUMAN Pre-mRNA-processing factor 6 OS=Homo sapiens OX=9606 GN=PRPF6 PE=1 SV=1	20.6139	20.0493	1	1	0.564573	0.617465	0.228656	0.287428	No	No	Yes	1.98086	3.53033
O94925	GLS	30	sp|O94925|GLSK_HUMAN Glutaminase kidney isoform, mitochondrial OS=Homo sapiens OX=9606 GN=GLS PE=1 SV=1	18.9704	16.1749	3	0	2.79556	3.05746	0.0235797	0.0386314	Yes	Yes	Yes	1.51726	3.57891
O94986	CEP152	86	sp|O94986|CE152_HUMAN Centrosomal protein of 152 kDa OS=Homo sapiens OX=9606 GN=CEP152 PE=1 SV=4	16.7427	20.7617	0	3	-4.01898	-4.3955	0.0841604	0.119379	No	No	Yes	1.60779	3.24025
O95232	LUC7L3	17	sp|O95232|LC7L3_HUMAN Luc7-like protein 3 OS=Homo sapiens OX=9606 GN=LUC7L3 PE=1 SV=2	19.2692	19.4075	3	3	-0.138306	-0.151263	0.919112	0.936256	No	No	Yes	2.65167	2.69759
O95297	MPZL1	5	sp|O95297|MPZL1_HUMAN Myelin protein zero-like protein 1 OS=Homo sapiens OX=9606 GN=MPZL1 PE=1 SV=1	22.9656	16.1919	1	0	6.77368	7.40827	0.000110241	0.00117234	No	No	Yes	1.87027	3.47763
O95373	IPO7	33	sp|O95373|IPO7_HUMAN Importin-7 OS=Homo sapiens OX=9606 GN=IPO7 PE=1 SV=1	19.9807	18.6328	1	1	1.34786	1.47414	0.00848469	0.0146581	No	No	Yes	2.52739	3.91245
O95433	AHSA1	19	sp|O95433|AHSA1_HUMAN Activator of 90 kDa heat shock protein ATPase homolog 1 OS=Homo sapiens OX=9606 GN=AHSA1 PE=1 SV=1	20.2958	16.1405	1	0	4.15533	4.54462	0.000780587	0.00186695	No	No	Yes	2.02069	3.33593
O95478	NSA2	8	sp|O95478|NSA2_HUMAN Ribosome biogenesis protein NSA2 homolog OS=Homo sapiens OX=9606 GN=NSA2 PE=1 SV=1	16.6738	19.3826	0	1	-2.70883	-2.96261	0.000325856	0.00132091	No	No	Yes	2.60057	2.619
O95613	PCNT	176	sp|O95613|PCNT_HUMAN Pericentrin OS=Homo sapiens OX=9606 GN=PCNT PE=1 SV=4	23.1137	24.5968	4	4	-1.48311	-1.62206	0.162364	0.215681	No	No	Yes	2.00908	3.51121
O95757	HSPA4L	21	sp|O95757|HS74L_HUMAN Heat shock 70 kDa protein 4L OS=Homo sapiens OX=9606 GN=HSPA4L PE=1 SV=3	19.1369	16.1706	3	0	2.96629	3.24419	0.0272576	0.043925	Yes	Yes	Yes	1.88056	3.42262
O95831	AIFM1	34	sp|O95831|AIFM1_HUMAN Apoptosis-inducing factor 1, mitochondrial OS=Homo sapiens OX=9606 GN=AIFM1 PE=1 SV=1	23.6932	16.2459	1	0	7.44733	8.14503	0.000110357	0.00117234	No	No	Yes	1.68627	3.49436
O96008	TOMM40	18	sp|O96008|TOM40_HUMAN Mitochondrial import receptor subunit TOM40 homolog OS=Homo sapiens OX=9606 GN=TOMM40 PE=1 SV=1	23.0402	16.1101	1	0	6.93015	7.5794	0.00015721	0.00117234	No	No	Yes	1.80757	3.1286
P00338	LDHA	29	sp|P00338|LDHA_HUMAN L-lactate dehydrogenase A chain OS=Homo sapiens OX=9606 GN=LDHA PE=1 SV=2	20.1663	20.1809	3	1	-0.0146008	-0.0159686	0.992145	0.992145	No	No	Yes	2.53379	3.38709
P00367	GLUD1	30	sp|P00367|DHE3_HUMAN Glutamate dehydrogenase 1, mitochondrial OS=Homo sapiens OX=9606 GN=GLUD1 PE=1 SV=2;sp|P49448|DHE4_HUMAN Glutamate dehydrogenase 2, mitochondrial OS=Homo sapiens OX=9606 GN=GLUD2 PE=1 SV=2	22.4731	16.2173	1	0	6.25579	6.84186	0.000142946	0.00117234	No	No	Yes	1.71036	2.66076
P00387	CYB5R3	18	sp|P00387|NB5R3_HUMAN NADH-cytochrome b5 reductase 3 OS=Homo sapiens OX=9606 GN=CYB5R3 PE=1 SV=3	19.1445	18.4846	3	1	0.659902	0.721724	0.471913	0.546396	No	No	Yes	2.0617	3.31649
P00403	MT-CO2	8	sp|P00403|COX2_HUMAN Cytochrome c oxidase subunit 2 OS=Homo sapiens OX=9606 GN=MT-CO2 PE=1 SV=1	21.2024	16.1459	1	0	5.0565	5.53022	0.000803563	0.00189103	No	No	No		3.41588
P00441	SOD1	14	sp|P00441|SODC_HUMAN Superoxide dismutase [Cu-Zn] OS=Homo sapiens OX=9606 GN=SOD1 PE=1 SV=2	24.0862	16.2013	1	0	7.88481	8.6235	9.62051e-05	0.00117234	No	No	Yes	2.66103	2.15918
P00491	PNP	20	sp|P00491|PNPH_HUMAN Purine nucleoside phosphorylase OS=Homo sapiens OX=9606 GN=PNP PE=1 SV=2	21.7739	16.1502	1	0	5.62368	6.15053	0.000137769	0.00117234	No	No	Yes	1.46969	3.18101
P00492	HPRT1	13	sp|P00492|HPRT_HUMAN Hypoxanthine-guanine phosphoribosyltransferase OS=Homo sapiens OX=9606 GN=HPRT1 PE=1 SV=2	21.5906	16.153	1	0	5.43768	5.94711	0.000152054	0.00117234	No	No	Yes	2.06869	3.10214
P00505	GOT2	33	sp|P00505|AATM_HUMAN Aspartate aminotransferase, mitochondrial OS=Homo sapiens OX=9606 GN=GOT2 PE=1 SV=3	23.9309	16.1887	1	0	7.7422	8.46752	0.000113185	0.00117234	No	No	Yes	2.05486	3.0863
P00558	PGK1	47	sp|P00558|PGK1_HUMAN Phosphoglycerate kinase 1 OS=Homo sapiens OX=9606 GN=PGK1 PE=1 SV=3	21.2526	19.0683	4	3	2.1843	2.38893	0.171986	0.226321	No	No	Yes	2.36873	2.94241
P00568	AK1	12	sp|P00568|KAD1_HUMAN Adenylate kinase isoenzyme 1 OS=Homo sapiens OX=9606 GN=AK1 PE=1 SV=3	18.1887	16.1773	3	0	2.01141	2.19985	0.0239998	0.0392542	Yes	Yes	Yes	1.01245	3.12688
P00918	CA2	22	sp|P00918|CAH2_HUMAN Carbonic anhydrase 2 OS=Homo sapiens OX=9606 GN=CA2 PE=1 SV=2	23.6737	16.129	1	0	7.54463	8.25145	0.000162479	0.00117234	No	No	Yes	2.06774	3.1443
P01040	CSTA	7	sp|P01040|CYTA_HUMAN Cystatin-A OS=Homo sapiens OX=9606 GN=CSTA PE=1 SV=1	20.8971	20.0674	2	4	0.829645	0.90737	0.0790578	0.112956	No	No	Yes	-0.000774771	1.56608
P01591	IGJ	2	sp|P01591|IGJ_HUMAN Immunoglobulin J chain OS=Homo sapiens OX=9606 GN=JCHAIN PE=1 SV=4	16.7273	18.9809	0	1	-2.25362	-2.46475	0.000290155	0.00129046	No	No	No		3.04197
P01833	PIGR	11	sp|P01833|PIGR_HUMAN Polymeric immunoglobulin receptor OS=Homo sapiens OX=9606 GN=PIGR PE=1 SV=4	16.6994	18.7817	0	1	-2.08232	-2.2774	0.00019926	0.00117995	No	No	No		3.79636
P01834	IGKC	5	sp|P01834|IGKC_HUMAN Immunoglobulin kappa constant OS=Homo sapiens OX=9606 GN=IGKC PE=1 SV=2;sp|P0DOX7|IGK_HUMAN Immunoglobulin kappa light chain OS=Homo sapiens OX=9606 PE=1 SV=1	16.6464	17.6126	0	1	-0.966243	-1.05677	0.000152477	0.00117234	No	No	No		2.53362
P01859	IGHG2	1	sp|P01859|IGHG2_HUMAN Immunoglobulin heavy constant gamma 2 OS=Homo sapiens OX=9606 GN=IGHG2 PE=1 SV=2	17.5548	16.1461	1	0	1.40878	1.54076	0.00598417	0.0105609	No	No	No		3.13406
P01876	IGHA1	6	sp|P01876|IGHA1_HUMAN Immunoglobulin heavy constant alpha 1 OS=Homo sapiens OX=9606 GN=IGHA1 PE=1 SV=2	19.5289	19.7864	3	3	-0.25756	-0.281689	0.872175	0.901989	No	No	No		3.19572
P02452	COL1A1	28	sp|P02452|CO1A1_HUMAN Collagen alpha-1(I) chain OS=Homo sapiens OX=9606 GN=COL1A1 PE=1 SV=5	18.1693	16.1461	1	0	2.02328	2.21283	0.00375384	0.00691017	No	No	Yes	1.05348	3.33712
P02462	COL4A1	9	sp|P02462|CO4A1_HUMAN Collagen alpha-1(IV) chain OS=Homo sapiens OX=9606 GN=COL4A1 PE=1 SV=4	16.6953	20.2874	0	1	-3.59217	-3.9287	4.66767e-05	0.00117234	No	No	Yes	1.11255	3.42928
P02545	LMNA	78	sp|P02545|LMNA_HUMAN Prelamin-A/C OS=Homo sapiens OX=9606 GN=LMNA PE=1 SV=1	22.4977	20.8485	2	1	1.64923	1.80374	0.0871104	0.123031	No	No	No		3.02291
P02679	FGG	3	sp|P02679|FIBG_HUMAN Fibrinogen gamma chain OS=Homo sapiens OX=9606 GN=FGG PE=1 SV=3	16.7237	17.622	0	1	-0.898343	-0.982504	2.42713e-05	0.00103733	No	No	No		3.28985
P02751	FN1	125	sp|P02751|FINC_HUMAN Fibronectin OS=Homo sapiens OX=9606 GN=FN1 PE=1 SV=5	24.4395	24.4156	4	4	0.0239331	0.0261752	0.981493	0.985504	No	No	Yes	1.60226	4.04111
P02788	LTF	36	sp|P02788|TRFL_HUMAN Lactotransferrin OS=Homo sapiens OX=9606 GN=LTF PE=1 SV=6	19.8687	20.229	4	4	-0.360251	-0.394001	0.547116	0.616054	No	No	No		3.59248
P02810	PRH1	2	sp|P02810|PRPC_HUMAN Salivary acidic proline-rich phosphoprotein 1/2 OS=Homo sapiens OX=9606 GN=PRH1 PE=1 SV=2	19.0066	18.4213	1	1	0.585279	0.640111	0.0834918	0.118602	No	No	Yes	0.265312	3.07402
P04040	CAT	24	sp|P04040|CATA_HUMAN Catalase OS=Homo sapiens OX=9606 GN=CAT PE=1 SV=3	20.8226	21.1716	4	4	-0.349043	-0.381743	0.373438	0.447125	No	No	Yes	1.40627	3.3085
P04075	ALDOA	38	sp|P04075|ALDOA_HUMAN Fructose-bisphosphate aldolase A OS=Homo sapiens OX=9606 GN=ALDOA PE=1 SV=2	21.4389	19.9351	4	4	1.50374	1.64461	0.345025	0.418715	No	No	Yes	2.14437	3.1563
P04080	CSTB	4	sp|P04080|CYTB_HUMAN Cystatin-B OS=Homo sapiens OX=9606 GN=CSTB PE=1 SV=2	21.4623	23.1248	1	1	-1.66243	-1.81817	0.0046928	0.00849544	No	No	Yes	2.01129	1.67154
P04083	ANXA1	28	sp|P04083|ANXA1_HUMAN Annexin A1 OS=Homo sapiens OX=9606 GN=ANXA1 PE=1 SV=2	22.6375	20.3044	4	3	2.33312	2.5517	0.280353	0.347087	No	No	Yes	0.490223	3.15554
P04114	APOB	7	sp|P04114|APOB_HUMAN Apolipoprotein B-100 OS=Homo sapiens OX=9606 GN=APOB PE=1 SV=2	16.7162	19.5301	0	1	-2.81392	-3.07754	1.72852e-06	0.000424783	No	No	No		4.11356
P04179	SOD2	14	sp|P04179|SODM_HUMAN Superoxide dismutase [Mn], mitochondrial OS=Homo sapiens OX=9606 GN=SOD2 PE=1 SV=3	20.3422	16.1337	1	0	4.2085	4.60277	0.00025134	0.00125827	No	No	Yes	1.67388	2.43003
P04181	OAT	36	sp|P04181|OAT_HUMAN Ornithine aminotransferase, mitochondrial OS=Homo sapiens OX=9606 GN=OAT PE=1 SV=1	23.9259	18.3574	4	1	5.56851	6.09019	9.04313e-06	0.00098771	Yes	Yes	Yes	1.84074	3.37523
P04259	KRT6B	2	sp|P04259|K2C6B_HUMAN Keratin, type II cytoskeletal 6B OS=Homo sapiens OX=9606 GN=KRT6B PE=1 SV=5	16.6877	21.9112	0	1	-5.22353	-5.71289	1.2028e-05	0.001025	No	No	No		2.18845
P04350	TUBB4A	4	sp|P04350|TBB4A_HUMAN Tubulin beta-4A chain OS=Homo sapiens OX=9606 GN=TUBB4A PE=1 SV=2	21.0045	16.202	1	0	4.80252	5.25245	0.000396868	0.00140801	No	No	Yes	0.562546	2.84742
P04406	GAPDH	38	sp|P04406|G3P_HUMAN Glyceraldehyde-3-phosphate dehydrogenase OS=Homo sapiens OX=9606 GN=GAPDH PE=1 SV=3	24.8937	23.5419	4	4	1.35175	1.47839	0.0596812	0.0877757	No	No	Yes	2.84099	2.94397
P04637	TP53	17	sp|P04637|P53_HUMAN Cellular tumor antigen p53 OS=Homo sapiens OX=9606 GN=TP53 PE=1 SV=4	20.5438	19.2664	4	1	1.27739	1.39706	0.00974114	0.0166691	Yes	Yes	Yes	1.7547	2.86764
P04792	HSPB1	20	sp|P04792|HSPB1_HUMAN Heat shock protein beta-1 OS=Homo sapiens OX=9606 GN=HSPB1 PE=1 SV=2	20.7935	20.5369	4	4	0.25662	0.280661	0.762395	0.808451	No	No	Yes	1.8044
P04843	RPN1	41	sp|P04843|RPN1_HUMAN Dolichyl-diphosphooligosaccharide--protein glycosyltransferase subunit 1 OS=Homo sapiens OX=9606 GN=RPN1 PE=1 SV=1	23.4458	16.1647	1	0	7.28104	7.96316	0.000165564	0.00117234	No	No	Yes	2.11619	3.66372
P04899	GNAI2	14	sp|P04899|GNAI2_HUMAN Guanine nucleotide-binding protein G(i) subunit alpha-2 OS=Homo sapiens OX=9606 GN=GNAI2 PE=1 SV=3	20.3117	20.4186	1	4	-0.106999	-0.117023	0.754192	0.801482	No	No	No		3.33311
P05023	ATP1A1	42	sp|P05023|AT1A1_HUMAN Sodium/potassium-transporting ATPase subunit alpha-1 OS=Homo sapiens OX=9606 GN=ATP1A1 PE=1 SV=1	23.3911	16.2082	1	0	7.18285	7.85577	0.000188622	0.00117234	No	No	Yes	2.48305	4.11589
P05089	ARG1	14	sp|P05089|ARGI1_HUMAN Arginase-1 OS=Homo sapiens OX=9606 GN=ARG1 PE=1 SV=2	20.1362	20.4987	3	3	-0.362495	-0.396455	0.827223	0.86186	No	No	No		3.32248
P05091	ALDH2	29	sp|P05091|ALDH2_HUMAN Aldehyde dehydrogenase, mitochondrial OS=Homo sapiens OX=9606 GN=ALDH2 PE=1 SV=2	21.2247	16.1549	4	0	5.06978	5.54474	0.000588188	0.00160163	Yes	Yes	Yes	1.92979	3.41287
P05109	S100A8	8	sp|P05109|S10A8_HUMAN Protein S100-A8 OS=Homo sapiens OX=9606 GN=S100A8 PE=1 SV=1	21.7899	21.0625	4	3	0.727389	0.795534	0.62764	0.694786	No	No	No		2.77463
P05114	HMGN1	11	sp|P05114|HMGN1_HUMAN Non-histone chromosomal protein HMG-14 OS=Homo sapiens OX=9606 GN=HMGN1 PE=1 SV=3	21.4982	21.2511	2	3	0.247075	0.270222	0.887084	0.913093	No	No	Yes	2.30138
P05141	SLC25A5	20	sp|P05141|ADT2_HUMAN ADP/ATP translocase 2 OS=Homo sapiens OX=9606 GN=SLC25A5 PE=1 SV=7	23.9751	24.053	4	4	-0.0778529	-0.0851465	0.889654	0.913824	No	No	Yes	2.70616	3.51006
P05198	EIF2S1	26	sp|P05198|IF2A_HUMAN Eukaryotic translation initiation factor 2 subunit 1 OS=Homo sapiens OX=9606 GN=EIF2S1 PE=1 SV=3	20.1726	16.1909	1	0	3.98162	4.35464	0.000552987	0.00155755	No	No	Yes	1.56447	3.05949
P05204	HMGN2	6	sp|P05204|HMGN2_HUMAN Non-histone chromosomal protein HMG-17 OS=Homo sapiens OX=9606 GN=HMGN2 PE=1 SV=3	23.2679	24.4886	4	4	-1.22074	-1.3351	0.0814767	0.116075	No	No	Yes	1.59596
P05387	RPLP2	11	sp|P05387|RLA2_HUMAN 60S acidic ribosomal protein P2 OS=Homo sapiens OX=9606 GN=RPLP2 PE=1 SV=1	23.7444	19.3222	1	1	4.42222	4.83651	1.63556e-05	0.00103733	No	No	Yes	2.99831	2.68518
P05388	RPLP0	20	sp|P05388|RLA0_HUMAN 60S acidic ribosomal protein P0 OS=Homo sapiens OX=9606 GN=RPLP0 PE=1 SV=1;sp|Q8NHW5|RLA0L_HUMAN 60S acidic ribosomal protein P0-like OS=Homo sapiens OX=9606 GN=RPLP0P6 PE=5 SV=1	21.2547	21.0267	4	4	0.22796	0.249316	0.687128	0.74596	No	No	Yes	3.02537	3.15087
P05455	SSB	36	sp|P05455|LA_HUMAN Lupus La protein OS=Homo sapiens OX=9606 GN=SSB PE=1 SV=2	19.6482	16.1481	3	0	3.50011	3.82802	0.0520327	0.0779848	No	No	Yes	2.68163	3.19674
P06454	PTMA	11	sp|P06454|PTMA_HUMAN Prothymosin alpha OS=Homo sapiens OX=9606 GN=PTMA PE=1 SV=2	22.0706	16.1627	2	0	5.90789	6.46137	0.00026876	0.00127566	Yes	Yes	Yes	3.1549
P06493	CDK1	22	sp|P06493|CDK1_HUMAN Cyclin-dependent kinase 1 OS=Homo sapiens OX=9606 GN=CDK1 PE=1 SV=3	21.2854	16.2191	4	0	5.06629	5.54092	0.00601604	0.0105792	Yes	Yes	Yes	2.20667	3.28504
P06576	ATP5B	40	sp|P06576|ATPB_HUMAN ATP synthase subunit beta, mitochondrial OS=Homo sapiens OX=9606 GN=ATP5F1B PE=1 SV=3	22.1941	19.3073	2	1	2.88684	3.15729	0.119262	0.162826	No	No	Yes	2.46506	3.52404
P06702	S100A9	10	sp|P06702|S10A9_HUMAN Protein S100-A9 OS=Homo sapiens OX=9606 GN=S100A9 PE=1 SV=1	22.5139	23.0362	4	4	-0.522314	-0.571247	0.253313	0.3164	No	No	No		2.47104
P06730	EIF4E	8	sp|P06730|IF4E_HUMAN Eukaryotic translation initiation factor 4E OS=Homo sapiens OX=9606 GN=EIF4E PE=1 SV=2	21.2126	16.174	1	0	5.03864	5.51069	0.00021295	0.00118099	No	No	Yes	1.73707	2.9538
P06733	ENO1	53	sp|P06733|ENOA_HUMAN Alpha-enolase OS=Homo sapiens OX=9606 GN=ENO1 PE=1 SV=2	22.4044	20.875	4	4	1.52941	1.67269	0.348181	0.421505	No	No	Yes	2.68516	2.71372
P06737	PYGL	29	sp|P06737|PYGL_HUMAN Glycogen phosphorylase, liver form OS=Homo sapiens OX=9606 GN=PYGL PE=1 SV=4	19.2084	16.1841	1	0	3.0243	3.30763	0.000993754	0.00213755	No	No	Yes	2.10708	3.51843
P06744	GPI	33	sp|P06744|G6PI_HUMAN Glucose-6-phosphate isomerase OS=Homo sapiens OX=9606 GN=GPI PE=1 SV=4	24.4629	16.1947	1	0	8.26814	9.04274	0.000238024	0.0012293	No	No	Yes	1.92493	3.58173
P06748	NPM1	38	sp|P06748|NPM_HUMAN Nucleophosmin OS=Homo sapiens OX=9606 GN=NPM1 PE=1 SV=2	25.0726	24.7489	4	4	0.323687	0.354012	0.515165	0.585442	No	No	Yes	2.99899	1.44762
P07099	EPHX1	16	sp|P07099|HYEP_HUMAN Epoxide hydrolase 1 OS=Homo sapiens OX=9606 GN=EPHX1 PE=1 SV=1	20.046	16.1781	1	0	3.86785	4.23021	0.00070361	0.00177346	No	No	Yes	0.987544	3.64906
P07195	LDHB	27	sp|P07195|LDHB_HUMAN L-lactate dehydrogenase B chain OS=Homo sapiens OX=9606 GN=LDHB PE=1 SV=2	20.9698	18.887	4	3	2.08281	2.27793	0.225782	0.284543	No	No	Yes	2.80022	3.3374
P07237	P4HB	52	sp|P07237|PDIA1_HUMAN Protein disulfide-isomerase OS=Homo sapiens OX=9606 GN=P4HB PE=1 SV=3	25.015	16.1749	1	0	8.84012	9.6683	8.28419e-05	0.00117234	No	No	Yes	2.03568	3.39633
P07305	H1F0	9	sp|P07305|H10_HUMAN Histone H1.0 OS=Homo sapiens OX=9606 GN=H1-0 PE=1 SV=3	20.1813	20.1981	2	3	-0.0168665	-0.0184467	0.989993	0.991001	No	No	Yes	1.69697	2.39387
P07339	CTSD	16	sp|P07339|CATD_HUMAN Cathepsin D OS=Homo sapiens OX=9606 GN=CTSD PE=1 SV=1	21.3714	16.1757	1	0	5.19564	5.68239	0.000374518	0.0013986	No	No	Yes	1.6439	3.48327
P07355	ANXA2	50	sp|P07355|ANXA2_HUMAN Annexin A2 OS=Homo sapiens OX=9606 GN=ANXA2 PE=1 SV=2;sp|A6NMY6|AXA2L_HUMAN Putative annexin A2-like protein OS=Homo sapiens OX=9606 GN=ANXA2P2 PE=5 SV=2	22.6598	22.6541	4	4	0.00569913	0.00623305	0.98763	0.989644	No	No	Yes	1.76869	3.28407
P07437	TUBB	7	sp|P07437|TBB5_HUMAN Tubulin beta chain OS=Homo sapiens OX=9606 GN=TUBB PE=1 SV=2	24.8258	22.3609	4	4	2.4649	2.69582	0.0059427	0.0105255	Yes	Yes	Yes	2.86825	2.9807
P07476	IVL	9	sp|P07476|INVO_HUMAN Involucrin OS=Homo sapiens OX=9606 GN=IVL PE=1 SV=2	21.8128	21.2272	1	1	0.585586	0.640446	0.0987731	0.137722	No	No	No
P07737	PFN1	21	sp|P07737|PROF1_HUMAN Profilin-1 OS=Homo sapiens OX=9606 GN=PFN1 PE=1 SV=2	21.8912	19.887	4	2	2.00415	2.19191	0.0444733	0.0676015	No	No	Yes	2.24138	2.92896
P07741	APRT	14	sp|P07741|APT_HUMAN Adenine phosphoribosyltransferase OS=Homo sapiens OX=9606 GN=APRT PE=1 SV=2	19.8716	16.1252	3	0	3.74646	4.09745	0.0305509	0.0485162	Yes	Yes	Yes	2.07971	2.42017
P07814	EPRS	85	sp|P07814|SYEP_HUMAN Bifunctional glutamate/proline--tRNA ligase OS=Homo sapiens OX=9606 GN=EPRS1 PE=1 SV=5	19.8412	20.4005	3	1	-0.559327	-0.611727	0.66756	0.735663	No	No	Yes	2.69646	3.59565
P07900	HSP90AA1	45	sp|P07900|HS90A_HUMAN Heat shock protein HSP 90-alpha OS=Homo sapiens OX=9606 GN=HSP90AA1 PE=1 SV=5	23.0407	20.4091	4	3	2.63157	2.87811	0.136816	0.184234	No	No	Yes	3.34139	3.55723
P07910	HNRNPC	36	sp|P07910|HNRPC_HUMAN Heterogeneous nuclear ribonucleoproteins C1/C2 OS=Homo sapiens OX=9606 GN=HNRNPC PE=1 SV=4	22.9599	21.8729	4	4	1.08705	1.18889	0.22325	0.282438	No	No	Yes	2.68065	2.82873
P07954	FH	26	sp|P07954|FUMH_HUMAN Fumarate hydratase, mitochondrial OS=Homo sapiens OX=9606 GN=FH PE=1 SV=3	19.6675	16.2005	1	0	3.46706	3.79187	0.000720059	0.00180106	No	No	Yes	1.63663	2.80534
P08133	ANXA6	44	sp|P08133|ANXA6_HUMAN Annexin A6 OS=Homo sapiens OX=9606 GN=ANXA6 PE=1 SV=3	21.7596	16.1351	1	0	5.62449	6.15142	0.000332493	0.00132324	No	No	Yes	1.69645	3.4386
P08195	SLC3A2	25	sp|P08195|4F2_HUMAN 4F2 cell-surface antigen heavy chain OS=Homo sapiens OX=9606 GN=SLC3A2 PE=1 SV=3	20.997	16.1089	1	0	4.88813	5.34607	0.000250826	0.00125827	No	No	Yes	2.09422	3.43665
P08238	HSP90AB1	35	sp|P08238|HS90B_HUMAN Heat shock protein HSP 90-beta OS=Homo sapiens OX=9606 GN=HSP90AB1 PE=1 SV=4	25.4768	23.2515	4	4	2.22534	2.43382	0.0229104	0.0376604	Yes	Yes	Yes	3.15414	3.54736
P08559	PDHA1	29	sp|P08559|ODPA_HUMAN Pyruvate dehydrogenase E1 component subunit alpha, somatic form, mitochondrial OS=Homo sapiens OX=9606 GN=PDHA1 PE=1 SV=3	22.3046	20.4288	4	1	1.87579	2.05153	0.000182353	0.00117234	Yes	Yes	Yes	2.12038	2.49877
P08572	COL4A2	13	sp|P08572|CO4A2_HUMAN Collagen alpha-2(IV) chain OS=Homo sapiens OX=9606 GN=COL4A2 PE=1 SV=4	16.7018	19.121	0	3	-2.41912	-2.64576	0.0531218	0.0792393	No	No	Yes	1.42436	3.52947
P08621	SNRNP70	30	sp|P08621|RU17_HUMAN U1 small nuclear ribonucleoprotein 70 kDa OS=Homo sapiens OX=9606 GN=SNRNP70 PE=1 SV=2	21.2218	21.5718	4	4	-0.349997	-0.382786	0.716248	0.770319	No	No	Yes	1.88966	2.57777
P08670	VIM	80	sp|P08670|VIME_HUMAN Vimentin OS=Homo sapiens OX=9606 GN=VIM PE=1 SV=4	24.7389	25.0076	4	4	-0.268756	-0.293934	0.721803	0.774599	No	No	Yes	2.66929	1.60173
P08708	RPS17	14	sp|P08708|RS17_HUMAN 40S ribosomal protein S17 OS=Homo sapiens OX=9606 GN=RPS17 PE=1 SV=2	20.7124	21.5401	3	4	-0.827715	-0.905259	0.583461	0.653039	No	No	Yes	3.09817	1.33304
P08758	ANXA5	24	sp|P08758|ANXA5_HUMAN Annexin A5 OS=Homo sapiens OX=9606 GN=ANXA5 PE=1 SV=2	23.2097	16.1382	1	0	7.07158	7.73408	0.000220728	0.00118099	No	No	Yes	2.00974	3.45922
P08865	RPSA	17	sp|P08865|RSSA_HUMAN 40S ribosomal protein SA OS=Homo sapiens OX=9606 GN=RPSA PE=1 SV=4	23.6394	20.0391	1	1	3.6003	3.9376	0.000377039	0.0013986	No	No	Yes	2.46313	3.2362
P09038	FGF2	3	sp|P09038|FGF2_HUMAN Fibroblast growth factor 2 OS=Homo sapiens OX=9606 GN=FGF2 PE=1 SV=3	21.8897	16.155	1	0	5.73473	6.27198	0.000174659	0.00117234	No	No	Yes	1.03903	2.22108
P09211	GSTP1	17	sp|P09211|GSTP1_HUMAN Glutathione S-transferase P OS=Homo sapiens OX=9606 GN=GSTP1 PE=1 SV=2	20.5491	16.2032	3	0	4.3459	4.75305	0.043117	0.0657116	No	No	Yes	2.43791	2.85783
P09429	HMGB1	15	sp|P09429|HMGB1_HUMAN High mobility group protein B1 OS=Homo sapiens OX=9606 GN=HMGB1 PE=1 SV=3;sp|B2RPK0|HGB1A_HUMAN Putative high mobility group protein B1-like 1 OS=Homo sapiens OX=9606 GN=HMGB1P1 PE=5 SV=1	21.6609	20.2758	4	1	1.3851	1.51486	0.214468	0.272028	No	No	Yes	2.60002	2.97115
P09543	CNP	27	sp|P09543|CN37_HUMAN 2,3-cyclic-nucleotide 3-phosphodiesterase OS=Homo sapiens OX=9606 GN=CNP PE=1 SV=2	20.3776	16.1714	2	0	4.20618	4.60024	0.000271983	0.00127566	Yes	Yes	Yes	1.49072	3.45066
P09622	DLD	28	sp|P09622|DLDH_HUMAN Dihydrolipoyl dehydrogenase, mitochondrial OS=Homo sapiens OX=9606 GN=DLD PE=1 SV=2	23.1389	16.166	1	0	6.97289	7.62614	0.000210568	0.00118099	No	No	Yes	1.8823	3.20666
P09651	HNRNPA1	38	sp|P09651|ROA1_HUMAN Heterogeneous nuclear ribonucleoprotein A1 OS=Homo sapiens OX=9606 GN=HNRNPA1 PE=1 SV=5;sp|Q32P51|RA1L2_HUMAN Heterogeneous nuclear ribonucleoprotein A1-like 2 OS=Homo sapiens OX=9606 GN=HNRNPA1L2 PE=2 SV=2	24.6295	23.5632	4	4	1.06624	1.16613	0.108054	0.148972	No	No	Yes	2.77366	3.11115
P09661	SNRPA1	18	sp|P09661|RU2A_HUMAN U2 small nuclear ribonucleoprotein A OS=Homo sapiens OX=9606 GN=SNRPA1 PE=1 SV=2	20.4519	16.1611	1	0	4.29077	4.69275	0.000415974	0.00141489	No	No	Yes	1.47338	2.6093
P09874	PARP1	83	sp|P09874|PARP1_HUMAN Poly [ADP-ribose] polymerase 1 OS=Homo sapiens OX=9606 GN=PARP1 PE=1 SV=4	23.9502	23.2378	4	4	0.71245	0.779195	0.377175	0.449955	No	No	Yes	2.69522	3.26082
P09936	UCHL1	16	sp|P09936|UCHL1_HUMAN Ubiquitin carboxyl-terminal hydrolase isozyme L1 OS=Homo sapiens OX=9606 GN=UCHL1 PE=1 SV=2	22.5496	16.2098	1	0	6.33976	6.9337	9.13102e-05	0.00117234	No	No	Yes	2.19771	2.84052
P09960	LTA4H	28	sp|P09960|LKHA4_HUMAN Leukotriene A-4 hydrolase OS=Homo sapiens OX=9606 GN=LTA4H PE=1 SV=2	20.1875	16.1528	1	0	4.03471	4.4127	5.70336e-05	0.00117234	No	No	Yes	1.96735	3.53606
P0DMV9	HSPA1B	37	sp|P0DMV9|HS71B_HUMAN Heat shock 70 kDa protein 1B OS=Homo sapiens OX=9606 GN=HSPA1B PE=1 SV=1;sp|P0DMV8|HS71A_HUMAN Heat shock 70 kDa protein 1A OS=Homo sapiens OX=9606 GN=HSPA1A PE=1 SV=1	24.3604	22.9768	4	4	1.3836	1.51322	0.118837	0.162471	No	No	Yes	1.61114	3.04626
P0DN76	U2AF1	11	sp|P0DN76|U2AF5_HUMAN Splicing factor U2AF 35 kDa subunit-like protein OS=Homo sapiens OX=9606 GN=U2AF1L5 PE=1 SV=1;sp|Q01081|U2AF1_HUMAN Splicing factor U2AF 35 kDa subunit OS=Homo sapiens OX=9606 GN=U2AF1 PE=1 SV=3	20.0501	20.0078	3	3	0.0423325	0.0462984	0.978366	0.984289	No	No	Yes	0.317365	2.64768
P0DN79	CBS	20	sp|P0DN79|CBSL_HUMAN Cystathionine beta-synthase-like protein OS=Homo sapiens OX=9606 GN=CBSL PE=1 SV=1;sp|P35520|CBS_HUMAN Cystathionine beta-synthase OS=Homo sapiens OX=9606 GN=CBS PE=1 SV=2	20.3676	16.1821	1	0	4.18553	4.57764	0.000558003	0.00156273	No	No	No		3.35692
P0DOX5	IGHG1	3	sp|P0DOX5|IGG1_HUMAN Immunoglobulin gamma-1 heavy chain OS=Homo sapiens OX=9606 PE=1 SV=2;sp|P01857|IGHG1_HUMAN Immunoglobulin heavy constant gamma 1 OS=Homo sapiens OX=9606 GN=IGHG1 PE=1 SV=1	19.651	16.1816	1	0	3.46939	3.79442	0.00116528	0.00242684	No	No	No		3.29043
P0DOY3	IGLC6	2	sp|P0DOY3|IGLC3_HUMAN Immunoglobulin lambda constant 3 OS=Homo sapiens OX=9606 GN=IGLC3 PE=1 SV=1;sp|P0DOY2|IGLC2_HUMAN Immunoglobulin lambda constant 2 OS=Homo sapiens OX=9606 GN=IGLC2 PE=1 SV=1;sp|P0CF74|IGLC6_HUMAN Immunoglobulin lambda constant 6 OS=Ho	16.6663	18.7792	0	1	-2.1129	-2.31085	0.00011051	0.00117234	No	No	No		2.75824
P0DP25	P0DP25	10	sp|P0DP25|CALM3_HUMAN Calmodulin-3 OS=Homo sapiens OX=9606 GN=CALM3 PE=1 SV=1;sp|P0DP24|CALM2_HUMAN Calmodulin-2 OS=Homo sapiens OX=9606 GN=CALM2 PE=1 SV=1;sp|P0DP23|CALM1_HUMAN Calmodulin-1 OS=Homo sapiens OX=9606 GN=CALM1 PE=1 SV=1	20.9794	20.0977	2	1	0.881765	0.964373	0.0727965	0.104925	No	No	No		2.28829
P0DPI2	P0DPI2	14	sp|P0DPI2|GAL3A_HUMAN Glutamine amidotransferase-like class 1 domain-containing protein 3A, mitochondrial OS=Homo sapiens OX=9606 GN=GATD3A PE=1 SV=1;sp|A0A0B4J2D5|GAL3B_HUMAN Glutamine amidotransferase-like class 1 domain-containing protein 3B, mitochondr	19.9131	16.2365	1	0	3.67665	4.0211	0.000848085	0.00193074	No	No	No		2.64525
P10155	TROVE2	12	sp|P10155|RO60_HUMAN 60 kDa SS-A/Ro ribonucleoprotein OS=Homo sapiens OX=9606 GN=RO60 PE=1 SV=2	21.2105	16.1648	1	0	5.04571	5.51841	7.38742e-05	0.00117234	No	No	Yes	2.15883	3.53959
P10412	HIST1H1E	3	sp|P10412|H14_HUMAN Histone H1.4 OS=Homo sapiens OX=9606 GN=H1-4 PE=1 SV=2	16.714	21.0883	0	2	-4.37427	-4.78407	6.20299e-06	0.000838624	Yes	Yes	Yes	1.6589	0.462398
P10515	DLAT	24	sp|P10515|ODP2_HUMAN Dihydrolipoyllysine-residue acetyltransferase component of pyruvate dehydrogenase complex, mitochondrial OS=Homo sapiens OX=9606 GN=DLAT PE=1 SV=3	19.7648	16.1199	1	0	3.64484	3.98631	0.00112932	0.00237205	No	No	Yes	1.63955	3.14665
P10599	TXN	9	sp|P10599|THIO_HUMAN Thioredoxin OS=Homo sapiens OX=9606 GN=TXN PE=1 SV=3	20.397	20.4472	3	3	-0.050199	-0.0549019	0.976645	0.984121	No	No	Yes	2.53814	2.36657
P10768	ESD	9	sp|P10768|ESTD_HUMAN S-formylglutathione hydrolase OS=Homo sapiens OX=9606 GN=ESD PE=1 SV=2	21.4742	16.1195	1	0	5.3547	5.85635	0.000180648	0.00117234	No	No	Yes	2.23672	3.11783
P10809	HSPD1	88	sp|P10809|CH60_HUMAN 60 kDa heat shock protein, mitochondrial OS=Homo sapiens OX=9606 GN=HSPD1 PE=1 SV=2	23.7179	20.1937	4	3	3.52418	3.85434	0.0586027	0.0864961	No	No	Yes	2.66634	3.16077
P11021	HSPA5	53	sp|P11021|BIP_HUMAN Endoplasmic reticulum chaperone BiP OS=Homo sapiens OX=9606 GN=HSPA5 PE=1 SV=2	25.4295	19.7545	1	1	5.6751	6.20677	0.000300255	0.00130279	No	No	Yes	2.65161	3.13604
P11142	HSPA8	50	sp|P11142|HSP7C_HUMAN Heat shock cognate 71 kDa protein OS=Homo sapiens OX=9606 GN=HSPA8 PE=1 SV=1	24.1321	22.7932	4	4	1.33891	1.46435	0.0867637	0.122894	No	No	Yes	1.95034	3.11495
P11177	PDHB	23	sp|P11177|ODPB_HUMAN Pyruvate dehydrogenase E1 component subunit beta, mitochondrial OS=Homo sapiens OX=9606 GN=PDHB PE=1 SV=3	22.4338	19.9326	4	2	2.50118	2.7355	0.00360437	0.00664745	Yes	Yes	Yes	1.89998	2.94368
P11310	ACADM	23	sp|P11310|ACADM_HUMAN Medium-chain specific acyl-CoA dehydrogenase, mitochondrial OS=Homo sapiens OX=9606 GN=ACADM PE=1 SV=1	22.3592	20.0911	4	1	2.26807	2.48056	0.000408995	0.00140801	Yes	Yes	Yes	2.11447	3.08785
P11387	TOP1	48	sp|P11387|TOP1_HUMAN DNA topoisomerase 1 OS=Homo sapiens OX=9606 GN=TOP1 PE=1 SV=2	22.0776	22.2451	1	1	-0.167505	-0.183198	0.679791	0.74487	No	No	Yes	2.58206	3.25819
P11388	TOP2A	81	sp|P11388|TOP2A_HUMAN DNA topoisomerase 2-alpha OS=Homo sapiens OX=9606 GN=TOP2A PE=1 SV=3	21.4289	22.1316	4	1	-0.702683	-0.768514	0.47053	0.545437	No	No	Yes	2.96914	3.60723
P11413	G6PD	38	sp|P11413|G6PD_HUMAN Glucose-6-phosphate 1-dehydrogenase OS=Homo sapiens OX=9606 GN=G6PD PE=1 SV=4	21.4888	16.1778	1	0	5.31097	5.80853	0.000148558	0.00117234	No	No	Yes	1.23773	3.56257
P11586	MTHFD1	64	sp|P11586|C1TC_HUMAN C-1-tetrahydrofolate synthase, cytoplasmic OS=Homo sapiens OX=9606 GN=MTHFD1 PE=1 SV=3	20.9637	17.9391	4	2	3.02458	3.30794	0.015487	0.0258907	Yes	Yes	Yes	2.01964	3.54681
P11940	PABPC1	26	sp|P11940|PABP1_HUMAN Polyadenylate-binding protein 1 OS=Homo sapiens OX=9606 GN=PABPC1 PE=1 SV=2;sp|Q9H361|PABP3_HUMAN Polyadenylate-binding protein 3 OS=Homo sapiens OX=9606 GN=PABPC3 PE=1 SV=2	20.8524	19.9918	4	1	0.86053	0.941148	0.206241	0.263635	No	No	Yes	3.22276	2.87575
P12004	PCNA	18	sp|P12004|PCNA_HUMAN Proliferating cell nuclear antigen OS=Homo sapiens OX=9606 GN=PCNA PE=1 SV=1	23.1726	16.1842	1	0	6.98841	7.64311	0.000183188	0.00117234	No	No	No		2.782
P12081	HARS	9	sp|P12081|HARS1_HUMAN Histidine--tRNA ligase, cytoplasmic OS=Homo sapiens OX=9606 GN=HARS1 PE=1 SV=2	19.7796	16.1743	1	0	3.60528	3.94304	0.00123339	0.00254178	No	No	Yes	1.2981	3.24375
P12236	SLC25A6	11	sp|P12236|ADT3_HUMAN ADP/ATP translocase 3 OS=Homo sapiens OX=9606 GN=SLC25A6 PE=1 SV=4	19.8539	20.4142	4	2	-0.56028	-0.61277	0.501101	0.57277	No	No	Yes	2.50516	3.49761
P12268	IMPDH2	30	sp|P12268|IMDH2_HUMAN Inosine-5-monophosphate dehydrogenase 2 OS=Homo sapiens OX=9606 GN=IMPDH2 PE=1 SV=2	20.7993	19.0395	4	1	1.7598	1.92467	0.177626	0.231881	No	No	Yes	2.26136	2.98837
P12270	TPR	99	sp|P12270|TPR_HUMAN Nucleoprotein TPR OS=Homo sapiens OX=9606 GN=TPR PE=1 SV=3	18.8274	16.1395	1	0	2.68795	2.93976	0.000824425	0.00191087	No	No	Yes	2.8235	2.97902
P12273	PIP	6	sp|P12273|PIP_HUMAN Prolactin-inducible protein OS=Homo sapiens OX=9606 GN=PIP PE=1 SV=1	18.9987	20.3239	3	2	-1.32519	-1.44934	0.19658	0.253594	No	No	No		3.32713
P12277	CKB	34	sp|P12277|KCRB_HUMAN Creatine kinase B-type OS=Homo sapiens OX=9606 GN=CKB PE=1 SV=1	24.0685	20.2247	4	3	3.8438	4.2039	0.0354666	0.0552169	No	No	Yes	2.77462	2.95353
P12532	CKMT1A	23	sp|P12532|KCRU_HUMAN Creatine kinase U-type, mitochondrial OS=Homo sapiens OX=9606 GN=CKMT1A PE=1 SV=1	21.7907	20.4358	1	2	1.35488	1.48181	0.0104546	0.01778	No	No	Yes	1.30675	2.94655
P12814	ACTN1	46	sp|P12814|ACTN1_HUMAN Alpha-actinin-1 OS=Homo sapiens OX=9606 GN=ACTN1 PE=1 SV=2	18.7225	16.2258	1	0	2.49671	2.73061	0.00208387	0.00399307	No	No	Yes	1.68215	3.55611
P12956	XRCC6	49	sp|P12956|XRCC6_HUMAN X-ray repair cross-complementing protein 6 OS=Homo sapiens OX=9606 GN=XRCC6 PE=1 SV=2	20.6377	18.1528	4	1	2.48488	2.71768	0.0898496	0.126536	No	No	Yes	2.24921	3.67224
P13010	XRCC5	55	sp|P13010|XRCC5_HUMAN X-ray repair cross-complementing protein 5 OS=Homo sapiens OX=9606 GN=XRCC5 PE=1 SV=3	21.8852	20.4539	2	1	1.43137	1.56546	0.238909	0.29955	No	No	Yes	2.62753	3.3641
P13073	COX4I1	11	sp|P13073|COX41_HUMAN Cytochrome c oxidase subunit 4 isoform 1, mitochondrial OS=Homo sapiens OX=9606 GN=COX4I1 PE=1 SV=1	21.4035	16.1536	1	0	5.24993	5.74177	0.000424501	0.00142418	No	No	Yes	2.45259	3.14266
P13473	LAMP2	6	sp|P13473|LAMP2_HUMAN Lysosome-associated membrane glycoprotein 2 OS=Homo sapiens OX=9606 GN=LAMP2 PE=1 SV=2	20.5378	16.1785	1	0	4.3593	4.7677	0.000472878	0.00146451	No	No	Yes	2.17651	3.59513
P13489	RNH1	21	sp|P13489|RINI_HUMAN Ribonuclease inhibitor OS=Homo sapiens OX=9606 GN=RNH1 PE=1 SV=2	20.1335	16.1809	1	0	3.95258	4.32288	0.00158059	0.00313249	No	No	Yes	1.53556	2.90148
P13639	EEF2	74	sp|P13639|EF2_HUMAN Elongation factor 2 OS=Homo sapiens OX=9606 GN=EEF2 PE=1 SV=4	24.5586	22.2845	4	4	2.27419	2.48725	0.00481443	0.00869961	Yes	Yes	Yes	3.06956	3.4023
P13667	PDIA4	55	sp|P13667|PDIA4_HUMAN Protein disulfide-isomerase A4 OS=Homo sapiens OX=9606 GN=PDIA4 PE=1 SV=2	22.9944	16.1	1	0	6.89446	7.54036	9.30339e-05	0.00117234	No	No	Yes	2.05456	3.57906
P13693	TPT1	9	sp|P13693|TCTP_HUMAN Translationally-controlled tumor protein OS=Homo sapiens OX=9606 GN=TPT1 PE=1 SV=1	22.7108	16.1847	1	0	6.52611	7.13751	0.000326709	0.00132091	No	No	Yes	3.06163	2.84397
P13797	PLS3	35	sp|P13797|PLST_HUMAN Plastin-3 OS=Homo sapiens OX=9606 GN=PLS3 PE=1 SV=4	23.1148	19.7462	1	1	3.36862	3.68421	0.000235326	0.00122395	No	No	Yes	2.67086	3.69905
P13804	ETFA	27	sp|P13804|ETFA_HUMAN Electron transfer flavoprotein subunit alpha, mitochondrial OS=Homo sapiens OX=9606 GN=ETFA PE=1 SV=1	22.6769	20.2485	4	2	2.42838	2.65588	0.000451988	0.00143553	Yes	Yes	Yes	2.22235	2.88935
P13861	PRKAR2A	19	sp|P13861|KAP2_HUMAN cAMP-dependent protein kinase type II-alpha regulatory subunit OS=Homo sapiens OX=9606 GN=PRKAR2A PE=1 SV=2	20.6245	18.9898	1	1	1.63464	1.78778	0.00658577	0.0115192	No	No	Yes	2.43197	2.87792
P13995	MTHFD2	21	sp|P13995|MTDC_HUMAN Bifunctional methylenetetrahydrofolate dehydrogenase/cyclohydrolase, mitochondrial OS=Homo sapiens OX=9606 GN=MTHFD2 PE=1 SV=2	19.3623	16.1689	1	0	3.19334	3.49251	0.000938	0.00205357	No	No	Yes	2.51121	2.96467
P14174	MIF	6	sp|P14174|MIF_HUMAN Macrophage migration inhibitory factor OS=Homo sapiens OX=9606 GN=MIF PE=1 SV=4	22.5994	16.174	1	0	6.42537	7.02733	7.29826e-05	0.00117234	No	No	Yes	1.55518	2.35894
P14314	PRKCSH	22	sp|P14314|GLU2B_HUMAN Glucosidase 2 subunit beta OS=Homo sapiens OX=9606 GN=PRKCSH PE=1 SV=2	22.2122	16.1888	1	0	6.02335	6.58765	0.000248678	0.00125827	No	No	Yes	1.44591	2.66826
P14618	PKM	52	sp|P14618|KPYM_HUMAN Pyruvate kinase PKM OS=Homo sapiens OX=9606 GN=PKM PE=1 SV=4	23.5899	21.7178	4	4	1.87209	2.04748	0.036533	0.0565543	No	No	Yes	2.3867	3.3375
P14625	HSP90B1	57	sp|P14625|ENPL_HUMAN Endoplasmin OS=Homo sapiens OX=9606 GN=HSP90B1 PE=1 SV=1	25.3233	16.1428	1	0	9.18054	10.0406	0.000157686	0.00117234	No	No	Yes	2.87986	3.60654
P14866	HNRNPL	38	sp|P14866|HNRPL_HUMAN Heterogeneous nuclear ribonucleoprotein L OS=Homo sapiens OX=9606 GN=HNRNPL PE=1 SV=2	23.5823	20.5908	4	4	2.99149	3.27175	0.0118687	0.0201154	Yes	Yes	Yes	1.88083	3.41611
P14868	DARS	33	sp|P14868|SYDC_HUMAN Aspartate--tRNA ligase, cytoplasmic OS=Homo sapiens OX=9606 GN=DARS1 PE=1 SV=2	20.5334	18.9754	2	1	1.55802	1.70398	0.0355006	0.0552169	No	No	Yes	2.27759	3.32407
P14923	JUP	42	sp|P14923|PLAK_HUMAN Junction plakoglobin OS=Homo sapiens OX=9606 GN=JUP PE=1 SV=3	25.0022	25.2317	4	4	-0.229524	-0.251027	0.678399	0.74427	No	No	Yes	1.12858	3.58246
P15121	AKR1B1	14	sp|P15121|ALDR_HUMAN Aldo-keto reductase family 1 member B1 OS=Homo sapiens OX=9606 GN=AKR1B1 PE=1 SV=3	21.9221	16.1685	1	0	5.75363	6.29265	0.000171769	0.00117234	No	No	Yes	2.10613	2.92386
P15170	GSPT1	12	sp|P15170|ERF3A_HUMAN Eukaryotic peptide chain release factor GTP-binding subunit ERF3A OS=Homo sapiens OX=9606 GN=GSPT1 PE=1 SV=1	20.308	16.178	4	0	4.12996	4.51687	1.09779e-05	0.001025	Yes	Yes	Yes	2.26755	3.45458
P15311	EZR	30	sp|P15311|EZRI_HUMAN Ezrin OS=Homo sapiens OX=9606 GN=EZR PE=1 SV=4	21.3715	16.1703	1	0	5.20122	5.68849	0.000177859	0.00117234	No	No	Yes	1.84171	3.10375
P15531	NME1	8	sp|P15531|NDKA_HUMAN Nucleoside diphosphate kinase A OS=Homo sapiens OX=9606 GN=NME1 PE=1 SV=1	22.3852	16.1473	1	0	6.23795	6.82235	0.000149045	0.00117234	No	No	Yes	2.24619	2.94727
P15880	RPS2	17	sp|P15880|RS2_HUMAN 40S ribosomal protein S2 OS=Homo sapiens OX=9606 GN=RPS2 PE=1 SV=2	22.3669	22.138	4	4	0.228897	0.250341	0.765974	0.811371	No	No	Yes	3.08168	2.76018
P15924	DSP	228	sp|P15924|DESP_HUMAN Desmoplakin OS=Homo sapiens OX=9606 GN=DSP PE=1 SV=3	26.7521	27.0432	4	4	-0.291137	-0.318412	0.70932	0.764542	No	No	Yes	2.15725	3.33942
P16152	CBR1	13	sp|P16152|CBR1_HUMAN Carbonyl reductase [NADPH] 1 OS=Homo sapiens OX=9606 GN=CBR1 PE=1 SV=3	19.3108	16.1599	3	0	3.15091	3.4461	0.0376838	0.058244	No	No	Yes	1.68041	2.9075
P16401	HIST1H1B	4	sp|P16401|H15_HUMAN Histone H1.5 OS=Homo sapiens OX=9606 GN=H1-5 PE=1 SV=3	16.7276	24.2376	0	1	-7.50992	-8.21348	2.32601e-05	0.00103733	No	No	No		-0.113509
P16403	HIST1H1C	5	sp|P16403|H12_HUMAN Histone H1.2 OS=Homo sapiens OX=9606 GN=H1-2 PE=1 SV=2	24.5125	26.9862	4	4	-2.47373	-2.70548	0.0171129	0.0284155	Yes	Yes	Yes	2.58827	0.462398
P16615	ATP2A2	35	sp|P16615|AT2A2_HUMAN Sarcoplasmic/endoplasmic reticulum calcium ATPase 2 OS=Homo sapiens OX=9606 GN=ATP2A2 PE=1 SV=1	21.008	16.1503	1	0	4.85777	5.31287	0.000793081	0.00188344	No	No	Yes	1.92499	4.11873
P17096	HMGA1	8	sp|P17096|HMGA1_HUMAN High mobility group protein HMG-I/HMG-Y OS=Homo sapiens OX=9606 GN=HMGA1 PE=1 SV=3	20.2033	20.2783	1	3	-0.0750237	-0.0820522	0.953022	0.963807	No	No	Yes	2.0207	0.332438
P17174	GOT1	21	sp|P17174|AATC_HUMAN Aspartate aminotransferase, cytoplasmic OS=Homo sapiens OX=9606 GN=GOT1 PE=1 SV=3	20.4192	16.1234	1	0	4.29579	4.69824	0.000760944	0.00183682	No	No	Yes	1.6221	3.05094
P17812	CTPS1	30	sp|P17812|PYRG1_HUMAN CTP synthase 1 OS=Homo sapiens OX=9606 GN=CTPS1 PE=1 SV=2	20.4763	16.1039	2	0	4.37237	4.78199	0.00153078	0.00305225	Yes	Yes	Yes	1.74246	3.30057
P17844	DDX5	47	sp|P17844|DDX5_HUMAN Probable ATP-dependent RNA helicase DDX5 OS=Homo sapiens OX=9606 GN=DDX5 PE=1 SV=1	23.4081	22.6716	4	4	0.736536	0.805538	0.190349	0.246525	No	No	Yes	2.46967	3.26479
P17980	PSMC3	31	sp|P17980|PRS6A_HUMAN 26S proteasome regulatory subunit 6A OS=Homo sapiens OX=9606 GN=PSMC3 PE=1 SV=3	20.446	16.1721	1	0	4.2739	4.6743	0.00103634	0.00221462	No	No	Yes	1.7988	2.71652
P17987	TCP1	39	sp|P17987|TCPA_HUMAN T-complex protein 1 subunit alpha OS=Homo sapiens OX=9606 GN=TCP1 PE=1 SV=1	23.9907	20.8897	1	1	3.101	3.39152	0.000871962	0.00196142	No	No	Yes	2.25714	3.38203
P18077	RPL35A	15	sp|P18077|RL35A_HUMAN 60S ribosomal protein L35a OS=Homo sapiens OX=9606 GN=RPL35A PE=1 SV=2	21.8476	20.5046	4	3	1.34296	1.46878	0.371861	0.44578	No	No	Yes	2.93078	0.995196
P18085	ARF4	8	sp|P18085|ARF4_HUMAN ADP-ribosylation factor 4 OS=Homo sapiens OX=9606 GN=ARF4 PE=1 SV=3	18.8688	16.1572	3	0	2.71167	2.96571	0.0190465	0.0314667	Yes	Yes	Yes	1.89192	3.29282
P18124	RPL7	25	sp|P18124|RL7_HUMAN 60S ribosomal protein L7 OS=Homo sapiens OX=9606 GN=RPL7 PE=1 SV=1	23.3691	22.8917	4	4	0.477338	0.522057	0.4458	0.521692	No	No	Yes	2.671	2.46313
P18206	VCL	52	sp|P18206|VINC_HUMAN Vinculin OS=Homo sapiens OX=9606 GN=VCL PE=1 SV=4	20.2954	16.1974	1	0	4.09799	4.48191	0.00107592	0.00227938	No	No	Yes	2.08015	2.7685
P18583	SON	35	sp|P18583|SON_HUMAN Protein SON OS=Homo sapiens OX=9606 GN=SON PE=1 SV=4	16.7314	20.5212	0	1	-3.78979	-4.14483	2.16572e-05	0.00103733	No	No	Yes	2.58388	2.97925
P18621	RPL17	20	sp|P18621|RL17_HUMAN 60S ribosomal protein L17 OS=Homo sapiens OX=9606 GN=RPL17 PE=1 SV=3	22.9377	22.7662	4	4	0.171522	0.187591	0.793085	0.833799	No	No	Yes	1.18269	0.926857
P18669	PGAM1	23	sp|P18669|PGAM1_HUMAN Phosphoglycerate mutase 1 OS=Homo sapiens OX=9606 GN=PGAM1 PE=1 SV=2	24.5078	16.1592	1	0	8.34859	9.13072	0.000209895	0.00118099	No	No	Yes	1.0287	2.6878
P18754	RCC1	23	sp|P18754|RCC1_HUMAN Regulator of chromosome condensation OS=Homo sapiens OX=9606 GN=RCC1 PE=1 SV=1	22.5413	20.2379	1	1	2.30333	2.51912	0.000794398	0.00188344	No	No	Yes	1.86502	3.25717
P19338	NCL	73	sp|P19338|NUCL_HUMAN Nucleolin OS=Homo sapiens OX=9606 GN=NCL PE=1 SV=3	23.4782	22.4013	4	4	1.07691	1.1778	0.223739	0.282693	No	No	Yes	3.18118	2.73206
P19367	HK1	43	sp|P19367|HXK1_HUMAN Hexokinase-1 OS=Homo sapiens OX=9606 GN=HK1 PE=1 SV=3	18.7975	16.1876	1	0	2.60988	2.85439	0.00100722	0.00216179	No	No	Yes	1.54576	3.68135
P19623	SRM	13	sp|P19623|SPEE_HUMAN Spermidine synthase OS=Homo sapiens OX=9606 GN=SRM PE=1 SV=1	19.223	16.2337	3	0	2.98928	3.26933	0.0311386	0.0493698	Yes	Yes	Yes	2.20888	2.83595
P20042	EIF2S2	16	sp|P20042|IF2B_HUMAN Eukaryotic translation initiation factor 2 subunit 2 OS=Homo sapiens OX=9606 GN=EIF2S2 PE=1 SV=2	20.4593	16.2002	1	0	4.25906	4.65807	0.000310897	0.00130773	No	No	Yes	2.50264	2.86605
P20290	BTF3	12	sp|P20290|BTF3_HUMAN Transcription factor BTF3 OS=Homo sapiens OX=9606 GN=BTF3 PE=1 SV=1	21.0248	16.1935	1	0	4.83138	5.284	0.00040855	0.00140801	No	No	Yes	2.54335	1.37346
P20618	PSMB1	12	sp|P20618|PSB1_HUMAN Proteasome subunit beta type-1 OS=Homo sapiens OX=9606 GN=PSMB1 PE=1 SV=2	21.4637	16.1936	1	0	5.2701	5.76383	0.000182784	0.00117234	No	No	Yes	2.20705	3.2472
P20674	COX5A	8	sp|P20674|COX5A_HUMAN Cytochrome c oxidase subunit 5A, mitochondrial OS=Homo sapiens OX=9606 GN=COX5A PE=1 SV=2	18.7168	16.1453	1	0	2.57142	2.81232	7.40569e-05	0.00117234	No	No	Yes	2.37146	2.56568
P20700	LMNB1	69	sp|P20700|LMNB1_HUMAN Lamin-B1 OS=Homo sapiens OX=9606 GN=LMNB1 PE=1 SV=2	22.2649	20.4725	2	3	1.79239	1.96031	0.333591	0.405841	No	No	Yes	2.07049	2.89463
P21333	FLNA	146	sp|P21333|FLNA_HUMAN Filamin-A OS=Homo sapiens OX=9606 GN=FLNA PE=1 SV=4	23.5004	16.1678	1	0	7.33258	8.01953	5.04549e-05	0.00117234	No	No	No		3.82515
P21796	VDAC1	27	sp|P21796|VDAC1_HUMAN Voltage-dependent anion-selective channel protein 1 OS=Homo sapiens OX=9606 GN=VDAC1 PE=1 SV=2	24.1394	16.1592	1	0	7.98015	8.72777	0.000172941	0.00117234	No	No	Yes	2.17794	2.41744
P21912	SDHB	14	sp|P21912|SDHB_HUMAN Succinate dehydrogenase [ubiquinone] iron-sulfur subunit, mitochondrial OS=Homo sapiens OX=9606 GN=SDHB PE=1 SV=3	20.5677	16.1604	1	0	4.4073	4.8202	0.000744255	0.00183077	No	No	Yes	1.93806	2.48589
P22061	PCMT1	13	sp|P22061|PIMT_HUMAN Protein-L-isoaspartate(D-aspartate) O-methyltransferase OS=Homo sapiens OX=9606 GN=PCMT1 PE=1 SV=4	20.3774	16.2106	1	0	4.1668	4.55717	0.00052343	0.00153134	No	No	Yes	2.21331	2.5928
P22087	FBL	20	sp|P22087|FBRL_HUMAN rRNA 2-O-methyltransferase fibrillarin OS=Homo sapiens OX=9606 GN=FBL PE=1 SV=2	23.0736	23.1344	4	4	-0.0607451	-0.066436	0.893143	0.915306	No	No	Yes	2.63975	3.30914
P22102	GART	49	sp|P22102|PUR2_HUMAN Trifunctional purine biosynthetic protein adenosine-3 OS=Homo sapiens OX=9606 GN=GART PE=1 SV=1	20.5854	16.1538	4	0	4.43166	4.84683	0.00588599	0.0104439	Yes	Yes	Yes	1.97936	3.65774
P22234	PAICS	35	sp|P22234|PUR6_HUMAN Multifunctional protein ADE2 OS=Homo sapiens OX=9606 GN=PAICS PE=1 SV=3	19.8126	18.9853	3	2	0.827322	0.90483	0.505979	0.575844	No	No	Yes	2.32852	3.19632
P22314	UBA1	63	sp|P22314|UBA1_HUMAN Ubiquitin-like modifier-activating enzyme 1 OS=Homo sapiens OX=9606 GN=UBA1 PE=1 SV=3	22.6846	21.2298	4	1	1.45485	1.59115	0.112479	0.154639	No	No	Yes	2.22366	3.60723
P22392	NME2	9	sp|P22392|NDKB_HUMAN Nucleoside diphosphate kinase B OS=Homo sapiens OX=9606 GN=NME2 PE=1 SV=1;sp|O60361|NDK8_HUMAN Putative nucleoside diphosphate kinase OS=Homo sapiens OX=9606 GN=NME2P1 PE=5 SV=1	20.4692	19.1973	3	2	1.27192	1.39108	0.462263	0.537121	No	No	Yes	0.263469	2.88208
P22528	SPRR1B	4	sp|P22528|SPR1B_HUMAN Cornifin-B OS=Homo sapiens OX=9606 GN=SPRR1B PE=1 SV=2;sp|P35321|SPR1A_HUMAN Cornifin-A OS=Homo sapiens OX=9606 GN=SPRR1A PE=1 SV=2	19.8749	21.5667	3	2	-1.69183	-1.85033	0.215602	0.273115	No	No	No
P22570	FDXR	35	sp|P22570|ADRO_HUMAN NADPH:adrenodoxin oxidoreductase, mitochondrial OS=Homo sapiens OX=9606 GN=FDXR PE=1 SV=3	19.6827	16.1986	4	0	3.48405	3.81045	7.61828e-05	0.00117234	Yes	Yes	Yes	1.15685	3.02874
P22626	HNRNPA2B1	46	sp|P22626|ROA2_HUMAN Heterogeneous nuclear ribonucleoproteins A2/B1 OS=Homo sapiens OX=9606 GN=HNRNPA2B1 PE=1 SV=2	24.8328	24.1728	4	4	0.659922	0.721747	0.301192	0.37009	No	No	Yes	2.76846	2.86736
P22695	UQCRC2	25	sp|P22695|QCR2_HUMAN Cytochrome b-c1 complex subunit 2, mitochondrial OS=Homo sapiens OX=9606 GN=UQCRC2 PE=1 SV=3	21.2608	16.1764	1	0	5.08442	5.56075	0.000240254	0.00123005	No	No	Yes	2.14313	2.89758
P22735	TGM1	26	sp|P22735|TGM1_HUMAN Protein-glutamine gamma-glutamyltransferase K OS=Homo sapiens OX=9606 GN=TGM1 PE=1 SV=4	21.9867	22.4872	4	4	-0.500587	-0.547484	0.346279	0.419719	No	No	Yes	-0.876917	3.76073
P23246	SFPQ	63	sp|P23246|SFPQ_HUMAN Splicing factor, proline- and glutamine-rich OS=Homo sapiens OX=9606 GN=SFPQ PE=1 SV=2	24.7645	24.0291	4	4	0.735362	0.804254	0.326239	0.397389	No	No	Yes	2.66093	2.88362
P23284	PPIB	22	sp|P23284|PPIB_HUMAN Peptidyl-prolyl cis-trans isomerase B OS=Homo sapiens OX=9606 GN=PPIB PE=1 SV=2	23.0348	20.1887	1	2	2.84616	3.1128	0.000637348	0.00166154	No	No	Yes	1.74542	3.41451
P23381	WARS	23	sp|P23381|SYWC_HUMAN Tryptophan--tRNA ligase, cytoplasmic OS=Homo sapiens OX=9606 GN=WARS1 PE=1 SV=2	20.5786	16.1556	1	0	4.42302	4.83739	0.000614519	0.00163331	No	No	Yes	1.79919	3.09569
P23396	RPS3	32	sp|P23396|RS3_HUMAN 40S ribosomal protein S3 OS=Homo sapiens OX=9606 GN=RPS3 PE=1 SV=2	22.8932	22.7929	4	4	0.100301	0.109697	0.855681	0.888209	No	No	Yes	3.17178	2.81291
P23490	LOR	3	sp|P23490|LORI_HUMAN Loricrin OS=Homo sapiens OX=9606 GN=LORICRIN PE=1 SV=2	19.821	21.6832	3	2	-1.86226	-2.03672	0.141868	0.189736	No	No	No
P23526	AHCY	28	sp|P23526|SAHH_HUMAN Adenosylhomocysteinase OS=Homo sapiens OX=9606 GN=AHCY PE=1 SV=4	21.6796	19.8239	4	1	1.85571	2.02956	0.0162443	0.0270646	Yes	Yes	Yes	1.97689	3.03922
P23527	HIST1H2BO	0	sp|P23527|H2B1O_HUMAN Histone H2B type 1-O OS=Homo sapiens OX=9606 GN=H2BC17 PE=1 SV=3	21.8197	23.6729	4	4	-1.85323	-2.02684	0.0777371	0.111231	No	No	No		2.59424
P23528	CFL1	13	sp|P23528|COF1_HUMAN Cofilin-1 OS=Homo sapiens OX=9606 GN=CFL1 PE=1 SV=3	22.5845	20.029	4	1	2.55556	2.79497	0.00118778	0.00246846	Yes	Yes	Yes	2.53835	3.07968
P23588	EIF4B	24	sp|P23588|IF4B_HUMAN Eukaryotic translation initiation factor 4B OS=Homo sapiens OX=9606 GN=EIF4B PE=1 SV=2	19.305	16.1357	1	0	3.1693	3.46621	0.000368449	0.00138768	No	No	Yes	2.20336	1.96661
P24534	EEF1B2	13	sp|P24534|EF1B_HUMAN Elongation factor 1-beta OS=Homo sapiens OX=9606 GN=EEF1B2 PE=1 SV=3	22.5211	16.1509	1	0	6.37019	6.96698	0.000151289	0.00117234	No	No	Yes	2.54025	1.40858
P24666	ACP1	6	sp|P24666|PPAC_HUMAN Low molecular weight phosphotyrosine protein phosphatase OS=Homo sapiens OX=9606 GN=ACP1 PE=1 SV=3	20.0046	16.1934	1	0	3.81122	4.16827	0.000162233	0.00117234	No	No	Yes	2.06771	2.73637
P24752	ACAT1	32	sp|P24752|THIL_HUMAN Acetyl-CoA acetyltransferase, mitochondrial OS=Homo sapiens OX=9606 GN=ACAT1 PE=1 SV=1	20.3682	16.1822	4	0	4.18599	4.57815	0.00329415	0.00609821	Yes	Yes	Yes	1.89649	3.40939
P25205	MCM3	46	sp|P25205|MCM3_HUMAN DNA replication licensing factor MCM3 OS=Homo sapiens OX=9606 GN=MCM3 PE=1 SV=3	21.043	16.2304	4	0	4.8127	5.26357	0.00140186	0.00282963	Yes	Yes	Yes	2.26749	3.50379
P25311	AZGP1	12	sp|P25311|ZA2G_HUMAN Zinc-alpha-2-glycoprotein OS=Homo sapiens OX=9606 GN=AZGP1 PE=1 SV=2	20.857	21.1114	4	4	-0.254341	-0.278169	0.583948	0.653039	No	No	No		3.23539
P25398	RPS12	12	sp|P25398|RS12_HUMAN 40S ribosomal protein S12 OS=Homo sapiens OX=9606 GN=RPS12 PE=1 SV=3	19.7816	20.5835	3	1	-0.801909	-0.877036	0.438383	0.514236	No	No	Yes	3.17981	2.401
P25685	DNAJB1	17	sp|P25685|DNJB1_HUMAN DnaJ homolog subfamily B member 1 OS=Homo sapiens OX=9606 GN=DNAJB1 PE=1 SV=4	19.4375	16.1692	1	0	3.26827	3.57446	0.000635905	0.00166154	No	No	No		2.77876
P25705	ATP5A1	52	sp|P25705|ATPA_HUMAN ATP synthase subunit alpha, mitochondrial OS=Homo sapiens OX=9606 GN=ATP5F1A PE=1 SV=1	23.5358	19.5908	4	3	3.94504	4.31463	0.0188028	0.0311164	Yes	Yes	Yes	2.37398	3.49413
P25786	PSMA1	20	sp|P25786|PSA1_HUMAN Proteasome subunit alpha type-1 OS=Homo sapiens OX=9606 GN=PSMA1 PE=1 SV=1	22.2816	16.2503	1	0	6.03128	6.59631	0.000146286	0.00117234	No	No	Yes	2.12178	2.80477
P25787	PSMA2	16	sp|P25787|PSA2_HUMAN Proteasome subunit alpha type-2 OS=Homo sapiens OX=9606 GN=PSMA2 PE=1 SV=2	21.6992	16.2042	1	0	5.495	6.0098	0.000140987	0.00117234	No	No	Yes	1.74983	3.16482
P25788	PSMA3	12	sp|P25788|PSA3_HUMAN Proteasome subunit alpha type-3 OS=Homo sapiens OX=9606 GN=PSMA3 PE=1 SV=2	19.8285	16.1419	1	0	3.68657	4.03194	9.46334e-05	0.00117234	No	No	Yes	2.06874	3.30315
P25789	PSMA4	12	sp|P25789|PSA4_HUMAN Proteasome subunit alpha type-4 OS=Homo sapiens OX=9606 GN=PSMA4 PE=1 SV=1	19.8885	16.1455	2	0	3.74296	4.09362	0.000875208	0.00196422	Yes	Yes	Yes	2.49335	2.94562
P26038	MSN	40	sp|P26038|MOES_HUMAN Moesin OS=Homo sapiens OX=9606 GN=MSN PE=1 SV=3	22.8593	16.1874	1	0	6.67192	7.29697	4.23124e-05	0.00117234	No	No	Yes	1.87652	3.23982
P26196	DDX6	20	sp|P26196|DDX6_HUMAN Probable ATP-dependent RNA helicase DDX6 OS=Homo sapiens OX=9606 GN=DDX6 PE=1 SV=2	21.0976	16.1691	1	0	4.92852	5.39024	0.00041263	0.00140839	No	No	Yes	2.10883	3.14574
P26368	U2AF2	24	sp|P26368|U2AF2_HUMAN Splicing factor U2AF 65 kDa subunit OS=Homo sapiens OX=9606 GN=U2AF2 PE=1 SV=4	20.9081	20.0526	4	3	0.855456	0.935599	0.541809	0.611479	No	No	Yes	2.14706	2.62592
P26373	RPL13	22	sp|P26373|RL13_HUMAN 60S ribosomal protein L13 OS=Homo sapiens OX=9606 GN=RPL13 PE=1 SV=4	24.0299	24.1578	4	4	-0.127857	-0.139835	0.787239	0.829428	No	No	Yes	3.00543	1.63438
P26583	HMGB2	15	sp|P26583|HMGB2_HUMAN High mobility group protein B2 OS=Homo sapiens OX=9606 GN=HMGB2 PE=1 SV=2	21.9211	16.1811	1	0	5.74001	6.27776	0.00019742	0.00117995	No	No	Yes	2.59719	2.9707
P26599	PTBP1	33	sp|P26599|PTBP1_HUMAN Polypyrimidine tract-binding protein 1 OS=Homo sapiens OX=9606 GN=PTBP1 PE=1 SV=1	20.1568	20.1979	3	2	-0.0411414	-0.0449957	0.979282	0.984289	No	No	Yes	2.25124	3.113
P26639	TARS	34	sp|P26639|SYTC_HUMAN Threonine--tRNA ligase 1, cytoplasmic OS=Homo sapiens OX=9606 GN=TARS1 PE=1 SV=3	19.7886	16.1988	2	0	3.58984	3.92615	0.0017886	0.00348847	Yes	Yes	Yes	2.43399	3.32431
P26641	EEF1G	30	sp|P26641|EF1G_HUMAN Elongation factor 1-gamma OS=Homo sapiens OX=9606 GN=EEF1G PE=1 SV=3	22.616	19.5552	4	3	3.06084	3.34759	0.052307	0.0781425	No	No	Yes	0.60888	3.4823
P27348	YWHAQ	17	sp|P27348|1433T_HUMAN 14-3-3 protein theta OS=Homo sapiens OX=9606 GN=YWHAQ PE=1 SV=1	21.6545	16.1761	1	0	5.47845	5.9917	0.000637638	0.00166154	No	No	Yes	2.01048	3.09553
P27635	RPL10	24	sp|P27635|RL10_HUMAN 60S ribosomal protein L10 OS=Homo sapiens OX=9606 GN=RPL10 PE=1 SV=4	22.6827	22.3657	4	4	0.316994	0.346691	0.630969	0.697686	No	No	Yes	2.51543	1.55931
P27694	RPA1	22	sp|P27694|RFA1_HUMAN Replication protein A 70 kDa DNA-binding subunit OS=Homo sapiens OX=9606 GN=RPA1 PE=1 SV=2	21.8768	19.6857	1	1	2.19107	2.39634	0.00398992	0.00731733	No	No	Yes	1.83875	3.39592
P27695	APEX1	19	sp|P27695|APEX1_HUMAN DNA-(apurinic or apyrimidinic site) endonuclease OS=Homo sapiens OX=9606 GN=APEX1 PE=1 SV=2	21.5005	16.1573	1	0	5.3432	5.84377	0.000347075	0.00133271	No	No	Yes	2.11145	3.23738
P27708	CAD	84	sp|P27708|PYR1_HUMAN CAD protein OS=Homo sapiens OX=9606 GN=CAD PE=1 SV=3	19.0266	16.2229	3	0	2.80377	3.06644	0.0242201	0.0395488	Yes	Yes	Yes	1.31493	3.88619
P27797	CALR	25	sp|P27797|CALR_HUMAN Calreticulin OS=Homo sapiens OX=9606 GN=CALR PE=1 SV=1	24.7875	16.185	1	0	8.60248	9.4084	0.000142079	0.00117234	No	No	Yes	2.43614	3.24041
P27816	MAP4	63	sp|P27816|MAP4_HUMAN Microtubule-associated protein 4 OS=Homo sapiens OX=9606 GN=MAP4 PE=1 SV=3	20.2352	16.1627	1	0	4.07245	4.45397	0.000671537	0.00172053	No	No	Yes	1.90628	2.47815
P27824	CANX	34	sp|P27824|CALX_HUMAN Calnexin OS=Homo sapiens OX=9606 GN=CANX PE=1 SV=2	23.6537	19.2319	1	1	4.42181	4.83607	0.000701177	0.00177249	No	No	Yes	2.94332	3.56915
P28066	PSMA5	10	sp|P28066|PSA5_HUMAN Proteasome subunit alpha type-5 OS=Homo sapiens OX=9606 GN=PSMA5 PE=1 SV=3	21.0859	16.1328	2	0	4.95311	5.41714	0.000952281	0.00207495	Yes	Yes	Yes	1.67065	2.79808
P28070	PSMB4	10	sp|P28070|PSB4_HUMAN Proteasome subunit beta type-4 OS=Homo sapiens OX=9606 GN=PSMB4 PE=1 SV=4	20.8769	16.2065	1	0	4.67036	5.1079	0.000731295	0.00181991	No	No	Yes	2.22836	2.54496
P28072	PSMB6	7	sp|P28072|PSB6_HUMAN Proteasome subunit beta type-6 OS=Homo sapiens OX=9606 GN=PSMB6 PE=1 SV=4	20.6951	16.1781	1	0	4.517	4.94017	8.84747e-05	0.00117234	No	No	Yes	2.14949	2.77327
P28074	PSMB5	12	sp|P28074|PSB5_HUMAN Proteasome subunit beta type-5 OS=Homo sapiens OX=9606 GN=PSMB5 PE=1 SV=3	21.6173	16.1711	1	0	5.44615	5.95637	0.000341474	0.00132675	No	No	Yes	2.17067	2.54217
P28331	NDUFS1	37	sp|P28331|NDUS1_HUMAN NADH-ubiquinone oxidoreductase 75 kDa subunit, mitochondrial OS=Homo sapiens OX=9606 GN=NDUFS1 PE=1 SV=3	19.5339	16.1724	1	0	3.36156	3.67649	0.000677401	0.00172957	No	No	Yes	2.04239	3.33353
P28838	LAP3	31	sp|P28838|AMPL_HUMAN Cytosol aminopeptidase OS=Homo sapiens OX=9606 GN=LAP3 PE=1 SV=3	20.3456	16.1077	1	0	4.23794	4.63497	0.000869191	0.00195967	No	No	Yes	1.51772	3.10727
P29401	TKT	36	sp|P29401|TKT_HUMAN Transketolase OS=Homo sapiens OX=9606 GN=TKT PE=1 SV=3	21.2582	18.6281	2	1	2.63007	2.87647	0.103222	0.142912	No	No	Yes	2.60279	3.39525
P29508	SERPINB3	9	sp|P29508|SPB3_HUMAN Serpin B3 OS=Homo sapiens OX=9606 GN=SERPINB3 PE=1 SV=2	21.8353	19.9145	2	3	1.92076	2.10071	0.126574	0.17233	No	No	No		3.43438
P29692	EEF1D	17	sp|P29692|EF1D_HUMAN Elongation factor 1-delta OS=Homo sapiens OX=9606 GN=EEF1D PE=1 SV=5	22.8998	16.1315	1	0	6.76825	7.40233	0.000215384	0.00118099	No	No	Yes	2.28549	2.08418
P30040	ERP29	17	sp|P30040|ERP29_HUMAN Endoplasmic reticulum resident protein 29 OS=Homo sapiens OX=9606 GN=ERP29 PE=1 SV=4	21.2878	16.2297	1	0	5.0581	5.53196	0.000174573	0.00117234	No	No	Yes	2.3429	3.1752
P30041	PRDX6	24	sp|P30041|PRDX6_HUMAN Peroxiredoxin-6 OS=Homo sapiens OX=9606 GN=PRDX6 PE=1 SV=3	19.4724	16.2159	3	0	3.25643	3.56151	0.0754832	0.108581	No	No	Yes	2.20848	3.19594
P30044	PRDX5	14	sp|P30044|PRDX5_HUMAN Peroxiredoxin-5, mitochondrial OS=Homo sapiens OX=9606 GN=PRDX5 PE=1 SV=4	20.9684	16.1306	2	0	4.83782	5.29105	0.000193204	0.00117234	Yes	Yes	Yes	1.88142	2.87242
P30046	DDT	9	sp|P30046|DOPD_HUMAN D-dopachrome decarboxylase OS=Homo sapiens OX=9606 GN=DDT PE=1 SV=3;sp|A6NHG4|DDTL_HUMAN D-dopachrome decarboxylase-like protein OS=Homo sapiens OX=9606 GN=DDTL PE=2 SV=1	22.2468	16.1337	1	0	6.1131	6.6858	0.000291436	0.00129046	No	No	Yes	2.22239	2.39361
P30048	PRDX3	15	sp|P30048|PRDX3_HUMAN Thioredoxin-dependent peroxide reductase, mitochondrial OS=Homo sapiens OX=9606 GN=PRDX3 PE=1 SV=3	21.5183	18.5072	4	1	3.0111	3.2932	0.014075	0.0236508	Yes	Yes	Yes	2.33885	3.04017
P30049	ATP5D	5	sp|P30049|ATPD_HUMAN ATP synthase subunit delta, mitochondrial OS=Homo sapiens OX=9606 GN=ATP5F1D PE=1 SV=2	20.7821	16.1757	1	0	4.60637	5.03791	0.00027949	0.00127566	No	No	Yes	1.3132	2.45599
P30050	RPL12	14	sp|P30050|RL12_HUMAN 60S ribosomal protein L12 OS=Homo sapiens OX=9606 GN=RPL12 PE=1 SV=1	21.7488	20.0487	2	3	1.70014	1.85942	0.254261	0.316779	No	No	Yes	2.78659	1.77757
P30084	ECHS1	20	sp|P30084|ECHM_HUMAN Enoyl-CoA hydratase, mitochondrial OS=Homo sapiens OX=9606 GN=ECHS1 PE=1 SV=4	22.2527	16.177	4	0	6.07564	6.64484	0.000175548	0.00117234	Yes	Yes	Yes	1.98596	3.11413
P30085	CMPK1	10	sp|P30085|KCY_HUMAN UMP-CMP kinase OS=Homo sapiens OX=9606 GN=CMPK1 PE=1 SV=3	20.7207	16.1663	1	0	4.55443	4.98111	0.000747031	0.00183077	No	No	Yes	1.43613	3.14461
P30086	PEBP1	16	sp|P30086|PEBP1_HUMAN Phosphatidylethanolamine-binding protein 1 OS=Homo sapiens OX=9606 GN=PEBP1 PE=1 SV=3	23.5118	16.1923	1	0	7.31947	8.00519	0.000169502	0.00117234	No	No	Yes	2.59711	3.09844
P30101	PDIA3	49	sp|P30101|PDIA3_HUMAN Protein disulfide-isomerase A3 OS=Homo sapiens OX=9606 GN=PDIA3 PE=1 SV=4	24.8665	16.1406	1	0	8.72592	9.5434	0.000125368	0.00117234	No	No	Yes	2.29097	3.21449
P30153	PPP2R1A	29	sp|P30153|2AAA_HUMAN Serine/threonine-protein phosphatase 2A 65 kDa regulatory subunit A alpha isoform OS=Homo sapiens OX=9606 GN=PPP2R1A PE=1 SV=4	20.0018	19.1413	1	1	0.860589	0.941213	0.0418819	0.0639285	No	No	Yes	1.47597	3.33037
P30405	PPIF	11	sp|P30405|PPIF_HUMAN Peptidyl-prolyl cis-trans isomerase F, mitochondrial OS=Homo sapiens OX=9606 GN=PPIF PE=1 SV=1	19.4097	16.1372	3	0	3.2725	3.57908	0.0323805	0.0508467	No	No	Yes	1.88589	2.6188
P30566	ADSL	16	sp|P30566|PUR8_HUMAN Adenylosuccinate lyase OS=Homo sapiens OX=9606 GN=ADSL PE=1 SV=2	18.704	16.1607	1	0	2.54329	2.78155	0.000565454	0.00157017	No	No	Yes	2.17937	3.24796
P30837	ALDH1B1	20	sp|P30837|AL1B1_HUMAN Aldehyde dehydrogenase X, mitochondrial OS=Homo sapiens OX=9606 GN=ALDH1B1 PE=1 SV=3	19.4842	16.2001	3	0	3.28412	3.59179	0.0292863	0.0468866	Yes	Yes	Yes	1.39598	3.37676
P31025	LCN1	6	sp|P31025|LCN1_HUMAN Lipocalin-1 OS=Homo sapiens OX=9606 GN=LCN1 PE=1 SV=1	19.267	19.5017	3	3	-0.234652	-0.256635	0.889241	0.913824	No	No	No		3.15947
P31040	SDHA	27	sp|P31040|SDHA_HUMAN Succinate dehydrogenase [ubiquinone] flavoprotein subunit, mitochondrial OS=Homo sapiens OX=9606 GN=SDHA PE=1 SV=2	21.797	16.1749	1	0	5.62213	6.14884	8.06101e-05	0.00117234	No	No	Yes	1.68838	3.01332
P31151	S100A7	6	sp|P31151|S10A7_HUMAN Protein S100-A7 OS=Homo sapiens OX=9606 GN=S100A7 PE=1 SV=4;sp|Q86SG5|S1A7A_HUMAN Protein S100-A7A OS=Homo sapiens OX=9606 GN=S100A7A PE=1 SV=3	20.1726	16.1478	2	0	4.02484	4.40191	0.00083604	0.00191809	Yes	Yes	No		2.20262
P31689	DNAJA1	23	sp|P31689|DNJA1_HUMAN DnaJ homolog subfamily A member 1 OS=Homo sapiens OX=9606 GN=DNAJA1 PE=1 SV=2	22.5517	16.1919	1	0	6.35981	6.95563	0.000182643	0.00117234	No	No	No		2.78224
P31930	UQCRC1	31	sp|P31930|QCR1_HUMAN Cytochrome b-c1 complex subunit 1, mitochondrial OS=Homo sapiens OX=9606 GN=UQCRC1 PE=1 SV=3	22.3417	16.1349	1	0	6.20675	6.78822	0.00032835	0.00132091	No	No	Yes	1.80829	3.05964
P31939	ATIC	42	sp|P31939|PUR9_HUMAN Bifunctional purine biosynthesis protein ATIC OS=Homo sapiens OX=9606 GN=ATIC PE=1 SV=3	20.5954	16.123	2	0	4.47238	4.89138	0.00401297	0.0073459	Yes	Yes	Yes	1.95009	3.21958
P31942	HNRNPH3	20	sp|P31942|HNRH3_HUMAN Heterogeneous nuclear ribonucleoprotein H3 OS=Homo sapiens OX=9606 GN=HNRNPH3 PE=1 SV=2	20.8203	18.982	4	2	1.83829	2.01051	0.0273335	0.0439752	Yes	Yes	Yes	2.26763	2.24358
P31943	HNRNPH1	19	sp|P31943|HNRH1_HUMAN Heterogeneous nuclear ribonucleoprotein H OS=Homo sapiens OX=9606 GN=HNRNPH1 PE=1 SV=4	23.8404	21.9403	4	4	1.9001	2.07811	0.00137221	0.00278694	Yes	Yes	Yes	2.59436	2.15887
P31944	CASP14	12	sp|P31944|CASPE_HUMAN Caspase-14 OS=Homo sapiens OX=9606 GN=CASP14 PE=1 SV=2	20.4256	19.3619	4	3	1.06371	1.16336	0.408688	0.482861	No	No	No		3.22492
P31946	YWHAB	11	sp|P31946|1433B_HUMAN 14-3-3 protein beta/alpha OS=Homo sapiens OX=9606 GN=YWHAB PE=1 SV=3	20.6305	16.1685	1	0	4.46197	4.87999	0.000326406	0.00132091	No	No	Yes	2.76681	3.05211
P31947	SFN	13	sp|P31947|1433S_HUMAN 14-3-3 protein sigma OS=Homo sapiens OX=9606 GN=SFN PE=1 SV=1	16.7021	17.8898	0	1	-1.18762	-1.29888	0.00599911	0.0105683	No	No	Yes	-0.489726	2.61642
P31948	STIP1	59	sp|P31948|STIP1_HUMAN Stress-induced-phosphoprotein 1 OS=Homo sapiens OX=9606 GN=STIP1 PE=1 SV=1	21.7672	16.2377	2	0	5.52957	6.04761	0.0052443	0.0094244	Yes	Yes	Yes	1.84596	3.14866
P31949	S100A11	6	sp|P31949|S10AB_HUMAN Protein S100-A11 OS=Homo sapiens OX=9606 GN=S100A11 PE=1 SV=2	19.26	18.592	1	1	0.667966	0.730544	0.0765511	0.109694	No	No	Yes	1.81183	2.75675
P32119	PRDX2	17	sp|P32119|PRDX2_HUMAN Peroxiredoxin-2 OS=Homo sapiens OX=9606 GN=PRDX2 PE=1 SV=5	22.3144	21.4012	4	4	0.913186	0.998737	0.158748	0.211163	No	No	Yes	1.75671	3.02912
P32969	RPL9	19	sp|P32969|RL9_HUMAN 60S ribosomal protein L9 OS=Homo sapiens OX=9606 GN=RPL9 PE=1 SV=1	21.1806	20.9137	4	4	0.266958	0.291967	0.744914	0.792479	No	No	Yes	2.81609	2.03619
P33316	DUT	11	sp|P33316|DUT_HUMAN Deoxyuridine 5-triphosphate nucleotidohydrolase, mitochondrial OS=Homo sapiens OX=9606 GN=DUT PE=1 SV=4	20.8998	16.1854	1	0	4.71434	5.156	0.000252245	0.00125827	No	No	Yes	2.24118	2.84448
P33991	MCM4	39	sp|P33991|MCM4_HUMAN DNA replication licensing factor MCM4 OS=Homo sapiens OX=9606 GN=MCM4 PE=1 SV=5	20.1378	16.1618	3	0	3.97595	4.34843	0.0312069	0.0493947	Yes	Yes	Yes	2.33904	3.56617
P33992	MCM5	35	sp|P33992|MCM5_HUMAN DNA replication licensing factor MCM5 OS=Homo sapiens OX=9606 GN=MCM5 PE=1 SV=5	19.6868	16.1491	3	0	3.5377	3.86912	0.026524	0.0428834	Yes	Yes	Yes	1.70033	3.17463
P33993	MCM7	41	sp|P33993|MCM7_HUMAN DNA replication licensing factor MCM7 OS=Homo sapiens OX=9606 GN=MCM7 PE=1 SV=4	21.6346	16.1471	4	0	5.48746	6.00155	0.00447195	0.00811057	Yes	Yes	Yes	2.05456	3.5181
P34897	SHMT2	37	sp|P34897|GLYM_HUMAN Serine hydroxymethyltransferase, mitochondrial OS=Homo sapiens OX=9606 GN=SHMT2 PE=1 SV=3	22.7473	20.3551	4	2	2.39218	2.61629	0.00413941	0.00756327	Yes	Yes	Yes	1.88477	3.34872
P34932	HSPA4	58	sp|P34932|HSP74_HUMAN Heat shock 70 kDa protein 4 OS=Homo sapiens OX=9606 GN=HSPA4 PE=1 SV=4	23.8447	16.1875	1	0	7.65721	8.37457	0.000117343	0.00117234	No	No	Yes	2.18472	3.21651
P35232	PHB	31	sp|P35232|PHB_HUMAN Prohibitin OS=Homo sapiens OX=9606 GN=PHB PE=1 SV=1	23.8234	16.1403	1	0	7.68316	8.40296	0.000170496	0.00117234	No	No	Yes	1.89301	2.85956
P35268	RPL22	8	sp|P35268|RL22_HUMAN 60S ribosomal protein L22 OS=Homo sapiens OX=9606 GN=RPL22 PE=1 SV=2	21.8034	21.8537	4	4	-0.0503582	-0.055076	0.905724	0.925495	No	No	Yes	2.45354	1.91174
P35325	SPRR2B	4	sp|P35325|SPR2B_HUMAN Small proline-rich protein 2B OS=Homo sapiens OX=9606 GN=SPRR2B PE=2 SV=1;sp|P22532|SPR2D_HUMAN Small proline-rich protein 2D OS=Homo sapiens OX=9606 GN=SPRR2D PE=2 SV=2;sp|P35326|SPR2A_HUMAN Small proline-rich protein 2A OS=Homo sapi	21.1924	20.6325	1	1	0.559886	0.612339	0.147738	0.197318	No	No	No
P35579	MYH9	147	sp|P35579|MYH9_HUMAN Myosin-9 OS=Homo sapiens OX=9606 GN=MYH9 PE=1 SV=4	21.4483	19.2685	4	3	2.17974	2.38395	0.125159	0.17064	No	No	Yes	1.82425	3.55264
P35580	MYH10	73	sp|P35580|MYH10_HUMAN Myosin-10 OS=Homo sapiens OX=9606 GN=MYH10 PE=1 SV=3	21.6444	16.1983	1	0	5.44611	5.95633	0.000314281	0.00131463	No	No	Yes	2.23023	3.56264
P35613	BSG	10	sp|P35613|BASI_HUMAN Basigin OS=Homo sapiens OX=9606 GN=BSG PE=1 SV=2	22.1033	16.1921	1	0	5.91123	6.46502	0.000177067	0.00117234	No	No	Yes	1.71571	3.49688
P35625	TIMP3	7	sp|P35625|TIMP3_HUMAN Metalloproteinase inhibitor 3 OS=Homo sapiens OX=9606 GN=TIMP3 PE=1 SV=2	16.712	17.2288	0	1	-0.516815	-0.565232	0.0321934	0.0506338	No	No	No		3.03995
P35637	FUS	14	sp|P35637|FUS_HUMAN RNA-binding protein FUS OS=Homo sapiens OX=9606 GN=FUS PE=1 SV=1	21.6529	20.3968	4	3	1.25602	1.37369	0.389303	0.462781	No	No	Yes	2.50744	1.6902
P35659	DEK	20	sp|P35659|DEK_HUMAN Protein DEK OS=Homo sapiens OX=9606 GN=DEK PE=1 SV=1	23.0441	16.1742	1	0	6.86998	7.51359	0.000243769	0.00124158	No	No	Yes	2.89335	1.62972
P35998	PSMC2	34	sp|P35998|PRS7_HUMAN 26S proteasome regulatory subunit 7 OS=Homo sapiens OX=9606 GN=PSMC2 PE=1 SV=3	18.955	16.1873	2	0	2.76775	3.02705	0.0014605	0.00293593	Yes	Yes	Yes	1.7852	2.92302
P36507	MAP2K2	11	sp|P36507|MP2K2_HUMAN Dual specificity mitogen-activated protein kinase kinase 2 OS=Homo sapiens OX=9606 GN=MAP2K2 PE=1 SV=1	20.0582	16.1371	2	0	3.92115	4.2885	0.000153215	0.00117234	Yes	Yes	Yes	1.7804	2.99001
P36542	ATP5C1	16	sp|P36542|ATPG_HUMAN ATP synthase subunit gamma, mitochondrial OS=Homo sapiens OX=9606 GN=ATP5F1C PE=1 SV=1	18.9989	18.4953	3	1	0.503594	0.550773	0.57884	0.648802	No	No	Yes	2.02847	3.19091
P36578	RPL4	42	sp|P36578|RL4_HUMAN 60S ribosomal protein L4 OS=Homo sapiens OX=9606 GN=RPL4 PE=1 SV=5	23.3679	22.4498	4	4	0.918119	1.00413	0.3886	0.462781	No	No	Yes	2.69371	2.8683
P36776	LONP1	46	sp|P36776|LONM_HUMAN Lon protease homolog, mitochondrial OS=Homo sapiens OX=9606 GN=LONP1 PE=1 SV=2	19.1245	16.2	3	0	2.92447	3.19845	0.0252528	0.0410985	Yes	Yes	Yes	1.46675	3.49953
P36873	PPP1CC	3	sp|P36873|PP1G_HUMAN Serine/threonine-protein phosphatase PP1-gamma catalytic subunit OS=Homo sapiens OX=9606 GN=PPP1CC PE=1 SV=1	19.5233	16.1796	1	0	3.34374	3.657	0.000784765	0.00187239	No	No	Yes	2.22846	3.10629
P37108	SRP14	10	sp|P37108|SRP14_HUMAN Signal recognition particle 14 kDa protein OS=Homo sapiens OX=9606 GN=SRP14 PE=1 SV=2	20.4407	16.1411	1	0	4.29961	4.70242	0.000795146	0.00188344	No	No	Yes	2.74526	2.07791
P37802	TAGLN2	23	sp|P37802|TAGL2_HUMAN Transgelin-2 OS=Homo sapiens OX=9606 GN=TAGLN2 PE=1 SV=3	20.1987	16.1087	1	0	4.08999	4.47316	0.000113292	0.00117234	No	No	Yes	2.16809	2.55873
P37837	TALDO1	25	sp|P37837|TALDO_HUMAN Transaldolase OS=Homo sapiens OX=9606 GN=TALDO1 PE=1 SV=2	22.6697	16.1682	1	0	6.50147	7.11056	0.000221061	0.00118099	No	No	Yes	1.77713	3.21599
P38117	ETFB	20	sp|P38117|ETFB_HUMAN Electron transfer flavoprotein subunit beta OS=Homo sapiens OX=9606 GN=ETFB PE=1 SV=3	22.0854	19.689	4	1	2.3964	2.62091	0.000572198	0.00158071	Yes	Yes	Yes	1.60799	2.7296
P38159	RBMX	18	sp|P38159|RBMX_HUMAN RNA-binding motif protein, X chromosome OS=Homo sapiens OX=9606 GN=RBMX PE=1 SV=3	21.3049	22.1568	3	4	-0.851984	-0.931802	0.687527	0.74596	No	No	Yes	2.54141	2.84496
P38606	ATP6V1A	32	sp|P38606|VATA_HUMAN V-type proton ATPase catalytic subunit A OS=Homo sapiens OX=9606 GN=ATP6V1A PE=1 SV=2	20.6594	16.1873	1	0	4.47214	4.89111	0.000335301	0.00132675	No	No	Yes	1.96479	3.37374
P38646	HSPA9	65	sp|P38646|GRP75_HUMAN Stress-70 protein, mitochondrial OS=Homo sapiens OX=9606 GN=HSPA9 PE=1 SV=2	25.3972	22.1264	4	4	3.27083	3.57726	0.0553376	0.0822948	No	No	Yes	2.32357	3.1329
P38919	EIF4A3	31	sp|P38919|IF4A3_HUMAN Eukaryotic initiation factor 4A-III OS=Homo sapiens OX=9606 GN=EIF4A3 PE=1 SV=4	21.124	20.738	4	2	0.386033	0.422198	0.497377	0.57117	No	No	Yes	2.24226	3.32368
P39019	RPS19	16	sp|P39019|RS19_HUMAN 40S ribosomal protein S19 OS=Homo sapiens OX=9606 GN=RPS19 PE=1 SV=2	22.3442	20.7569	2	4	1.58734	1.73605	0.0711675	0.10303	No	No	Yes	3.07158	1.4685
P39023	RPL3	39	sp|P39023|RL3_HUMAN 60S ribosomal protein L3 OS=Homo sapiens OX=9606 GN=RPL3 PE=1 SV=2	23.0371	20.7097	4	3	2.32742	2.54546	0.203548	0.261552	No	No	Yes	2.55038	3.01864
P39656	DDOST	16	sp|P39656|OST48_HUMAN Dolichyl-diphosphooligosaccharide--protein glycosyltransferase 48 kDa subunit OS=Homo sapiens OX=9606 GN=DDOST PE=1 SV=4	22.0545	16.1437	1	0	5.91075	6.4645	0.000229941	0.00120873	No	No	Yes	1.81337	3.53836
P39687	ANP32A	12	sp|P39687|AN32A_HUMAN Acidic leucine-rich nuclear phosphoprotein 32 family member A OS=Homo sapiens OX=9606 GN=ANP32A PE=1 SV=1	22.3853	16.1438	1	0	6.24145	6.82617	0.000212512	0.00118099	No	No	Yes	2.23494	1.60206
P39748	FEN1	23	sp|P39748|FEN1_HUMAN Flap endonuclease 1 OS=Homo sapiens OX=9606 GN=FEN1 PE=1 SV=1	19.2907	20.3114	3	1	-1.02068	-1.1163	0.305447	0.374664	No	No	Yes	1.91945	2.94795
P40227	CCT6A	34	sp|P40227|TCPZ_HUMAN T-complex protein 1 subunit zeta OS=Homo sapiens OX=9606 GN=CCT6A PE=1 SV=3	21.339	16.2043	2	0	5.13473	5.61578	0.0129218	0.0217502	Yes	Yes	Yes	2.51642	3.22397
P40429	RPL13A	17	sp|P40429|RL13A_HUMAN 60S ribosomal protein L13a OS=Homo sapiens OX=9606 GN=RPL13A PE=1 SV=2	22.0339	21.8065	4	4	0.227434	0.248741	0.809319	0.848146	No	No	Yes	3.09012	2.36036
P40925	MDH1	18	sp|P40925|MDHC_HUMAN Malate dehydrogenase, cytoplasmic OS=Homo sapiens OX=9606 GN=MDH1 PE=1 SV=4	21.6323	16.1723	1	0	5.46004	5.97156	0.000165704	0.00117234	No	No	Yes	2.10468	3.27239
P40926	MDH2	30	sp|P40926|MDHM_HUMAN Malate dehydrogenase, mitochondrial OS=Homo sapiens OX=9606 GN=MDH2 PE=1 SV=3	22.1421	18.9811	2	1	3.16103	3.45716	0.065474	0.0953496	No	No	Yes	2.2068	3.23769
P40939	HADHA	56	sp|P40939|ECHA_HUMAN Trifunctional enzyme subunit alpha, mitochondrial OS=Homo sapiens OX=9606 GN=HADHA PE=1 SV=2	22.534	18.9952	4	2	3.53883	3.87036	4.29008e-05	0.00117234	Yes	Yes	Yes	2.2581	3.14823
P41091	EIF2S3	22	sp|P41091|IF2G_HUMAN Eukaryotic translation initiation factor 2 subunit 3 OS=Homo sapiens OX=9606 GN=EIF2S3 PE=1 SV=3;sp|Q2VIR3|IF2GL_HUMAN Eukaryotic translation initiation factor 2 subunit 3B OS=Homo sapiens OX=9606 GN=EIF2S3B PE=2 SV=2	21.8233	20.7034	1	1	1.11989	1.2248	0.0312548	0.0493947	No	No	Yes	2.2255	3.27867
P41250	GARS	37	sp|P41250|GARS_HUMAN Glycine--tRNA ligase OS=Homo sapiens OX=9606 GN=GARS1 PE=1 SV=3	20.6003	16.1157	1	0	4.48454	4.90467	0.000551927	0.00155755	No	No	Yes	2.13041	3.31911
P41252	IARS	49	sp|P41252|SYIC_HUMAN Isoleucine--tRNA ligase, cytoplasmic OS=Homo sapiens OX=9606 GN=IARS1 PE=1 SV=2	20.5525	19.2466	2	1	1.30586	1.4282	0.0606068	0.088826	No	No	Yes	2.03207	3.92281
P42167	TMPO	17	sp|P42167|LAP2B_HUMAN Lamina-associated polypeptide 2, isoforms beta/gamma OS=Homo sapiens OX=9606 GN=TMPO PE=1 SV=2	22.9421	20.8068	1	1	2.13532	2.33536	0.00320452	0.00594348	No	No	Yes	2.24463	3.32661
P42357	HAL	10	sp|P42357|HUTH_HUMAN Histidine ammonia-lyase OS=Homo sapiens OX=9606 GN=HAL PE=1 SV=1	20.1144	19.4588	2	3	0.655613	0.717034	0.4861	0.560183	No	No	No		3.16647
P42677	RPS27	3	sp|P42677|RS27_HUMAN 40S ribosomal protein S27 OS=Homo sapiens OX=9606 GN=RPS27 PE=1 SV=3	21.9218	21.7068	4	4	0.214959	0.235098	0.6258	0.693714	No	No	Yes	2.57929	2.81061
P42704	LRPPRC	103	sp|P42704|LPPRC_HUMAN Leucine-rich PPR motif-containing protein, mitochondrial OS=Homo sapiens OX=9606 GN=LRPPRC PE=1 SV=3	24.1869	20.2882	4	2	3.89867	4.26392	5.3048e-05	0.00117234	Yes	Yes	Yes	2.12318	3.8454
P42766	RPL35	9	sp|P42766|RL35_HUMAN 60S ribosomal protein L35 OS=Homo sapiens OX=9606 GN=RPL35 PE=1 SV=2	21.9536	20.9507	4	3	1.00289	1.09685	0.539891	0.611421	No	No	Yes	2.744	2.50076
P43243	MATR3	62	sp|P43243|MATR3_HUMAN Matrin-3 OS=Homo sapiens OX=9606 GN=MATR3 PE=1 SV=2	23.0249	19.9236	4	3	3.10125	3.39179	0.047657	0.0718509	No	No	Yes	2.59258	2.38833
P43246	MSH2	34	sp|P43246|MSH2_HUMAN DNA mismatch repair protein Msh2 OS=Homo sapiens OX=9606 GN=MSH2 PE=1 SV=1	18.8851	16.1536	1	0	2.73149	2.98739	0.000972533	0.0021011	No	No	Yes	1.87564	3.54458
P43487	RANBP1	11	sp|P43487|RANG_HUMAN Ran-specific GTPase-activating protein OS=Homo sapiens OX=9606 GN=RANBP1 PE=1 SV=1	20.0663	16.1519	3	0	3.91439	4.2811	0.0330725	0.0517679	No	No	Yes	2.35171	1.15412
P43686	PSMC4	25	sp|P43686|PRS6B_HUMAN 26S proteasome regulatory subunit 6B OS=Homo sapiens OX=9606 GN=PSMC4 PE=1 SV=2	21.229	16.1573	1	0	5.07169	5.54683	0.000308947	0.00130773	No	No	Yes	1.83566	2.9899
P43897	TSFM	17	sp|P43897|EFTS_HUMAN Elongation factor Ts, mitochondrial OS=Homo sapiens OX=9606 GN=TSFM PE=1 SV=2	20.7217	16.1664	1	0	4.55534	4.9821	0.000751652	0.00183343	No	No	Yes	1.43661	2.99737
P45880	VDAC2	20	sp|P45880|VDAC2_HUMAN Voltage-dependent anion-selective channel protein 2 OS=Homo sapiens OX=9606 GN=VDAC2 PE=1 SV=2	21.3811	20.7567	4	1	0.624438	0.682938	0.417633	0.492246	No	No	Yes	2.10262	2.36988
P46013	MKI67	121	sp|P46013|KI67_HUMAN Proliferation marker protein Ki-67 OS=Homo sapiens OX=9606 GN=MKI67 PE=1 SV=2	19.7181	21.4396	3	1	-1.72152	-1.8828	0.155818	0.207546	No	No	Yes	2.42581	3.3905
P46060	RANGAP1	31	sp|P46060|RAGP1_HUMAN Ran GTPase-activating protein 1 OS=Homo sapiens OX=9606 GN=RANGAP1 PE=1 SV=1	20.4167	18.685	2	1	1.73165	1.89388	0.0593907	0.0875278	No	No	Yes	1.80862	3.16328
P46087	NOP2	40	sp|P46087|NOP2_HUMAN Probable 28S rRNA (cytosine(4447)-C(5))-methyltransferase OS=Homo sapiens OX=9606 GN=NOP2 PE=1 SV=2	19.2162	19.6151	3	3	-0.398922	-0.436294	0.799327	0.839464	No	No	Yes	1.29391	3.12556
P46459	NSF	38	sp|P46459|NSF_HUMAN Vesicle-fusing ATPase OS=Homo sapiens OX=9606 GN=NSF PE=1 SV=3	19.8394	16.1435	3	0	3.69588	4.04213	0.027613	0.0443522	Yes	Yes	Yes	1.56796	3.50173
P46776	RPL27A	10	sp|P46776|RL27A_HUMAN 60S ribosomal protein L27a OS=Homo sapiens OX=9606 GN=RPL27A PE=1 SV=2	19.8834	22.53	3	1	-2.64658	-2.89452	0.0713764	0.103181	No	No	Yes	3.35632	2.51586
P46777	RPL5	32	sp|P46777|RL5_HUMAN 60S ribosomal protein L5 OS=Homo sapiens OX=9606 GN=RPL5 PE=1 SV=3	21.1575	21.6913	4	4	-0.533815	-0.583825	0.506133	0.575844	No	No	Yes	3.40057	2.35436
P46778	RPL21	18	sp|P46778|RL21_HUMAN 60S ribosomal protein L21 OS=Homo sapiens OX=9606 GN=RPL21 PE=1 SV=2	22.2067	21.9098	4	4	0.296921	0.324738	0.59347	0.66143	No	No	Yes	2.64909	2.40983
P46779	RPL28	23	sp|P46779|RL28_HUMAN 60S ribosomal protein L28 OS=Homo sapiens OX=9606 GN=RPL28 PE=1 SV=3	21.4471	21.9123	4	4	-0.465231	-0.508816	0.692864	0.749268	No	No	Yes	2.41931	2.69822
P46781	RPS9	24	sp|P46781|RS9_HUMAN 40S ribosomal protein S9 OS=Homo sapiens OX=9606 GN=RPS9 PE=1 SV=3	23.5856	23.6776	4	4	-0.091939	-0.100552	0.877645	0.906224	No	No	Yes	2.47433	1.87547
P46782	RPS5	20	sp|P46782|RS5_HUMAN 40S ribosomal protein S5 OS=Homo sapiens OX=9606 GN=RPS5 PE=1 SV=4	19.8098	21.1021	1	1	-1.29229	-1.41336	0.00957724	0.0164301	No	No	Yes	2.71696	3.03631
P46783	RPS10	13	sp|P46783|RS10_HUMAN 40S ribosomal protein S10 OS=Homo sapiens OX=9606 GN=RPS10 PE=1 SV=1	22.4813	22.1216	2	2	0.35977	0.393475	0.352022	0.425631	No	No	Yes	2.7665	2.94824
P46940	IQGAP1	72	sp|P46940|IQGA1_HUMAN Ras GTPase-activating-like protein IQGAP1 OS=Homo sapiens OX=9606 GN=IQGAP1 PE=1 SV=1	20.5881	18.149	1	1	2.43903	2.66753	0.00054692	0.00155755	No	No	Yes	2.272	3.82236
P47756	CAPZB	14	sp|P47756|CAPZB_HUMAN F-actin-capping protein subunit beta OS=Homo sapiens OX=9606 GN=CAPZB PE=1 SV=4	20.8912	16.1261	1	0	4.76508	5.2115	0.000409656	0.00140801	No	No	Yes	2.08143	3.00017
P47813	EIF1AX	7	sp|P47813|IF1AX_HUMAN Eukaryotic translation initiation factor 1A, X-chromosomal OS=Homo sapiens OX=9606 GN=EIF1AX PE=1 SV=2;sp|O14602|IF1AY_HUMAN Eukaryotic translation initiation factor 1A, Y-chromosomal OS=Homo sapiens OX=9606 GN=EIF1AY PE=1 SV=4	21.4461	16.1948	1	0	5.25127	5.74323	4.11284e-05	0.00117234	No	No	Yes	2.40264	2.69585
P47897	QARS	50	sp|P47897|SYQ_HUMAN Glutamine--tRNA ligase OS=Homo sapiens OX=9606 GN=QARS1 PE=1 SV=1	21.6918	16.1209	1	0	5.57094	6.09285	0.000535967	0.00154503	No	No	Yes	1.99553	3.45137
P47914	RPL29	8	sp|P47914|RL29_HUMAN 60S ribosomal protein L29 OS=Homo sapiens OX=9606 GN=RPL29 PE=1 SV=2	22.2121	21.966	2	2	0.246081	0.269136	0.541269	0.611479	No	No	Yes	2.36607	2.01799
P47929	LGALS7	7	sp|P47929|LEG7_HUMAN Galectin-7 OS=Homo sapiens OX=9606 GN=LGALS7 PE=1 SV=2	21.3168	20.0458	4	3	1.27098	1.39005	0.323986	0.395626	No	No	No		2.40193
P47985	UQCRFS1	11	sp|P47985|UCRI_HUMAN Cytochrome b-c1 complex subunit Rieske, mitochondrial OS=Homo sapiens OX=9606 GN=UQCRFS1 PE=1 SV=2;sp|P0C7P4|UCRIL_HUMAN Putative cytochrome b-c1 complex subunit Rieske-like protein 1 OS=Homo sapiens OX=9606 GN=UQCRFS1P1 PE=5 SV=1	20.662	16.1555	1	0	4.50651	4.9287	0.000557117	0.00156273	No	No	Yes	1.66782	3.32391
P48047	ATP5O	16	sp|P48047|ATPO_HUMAN ATP synthase subunit O, mitochondrial OS=Homo sapiens OX=9606 GN=ATP5PO PE=1 SV=1	18.9198	16.1843	3	0	2.73558	2.99186	0.0444946	0.0676015	No	No	Yes	2.52553	2.31442
P48444	ARCN1	22	sp|P48444|COPD_HUMAN Coatomer subunit delta OS=Homo sapiens OX=9606 GN=ARCN1 PE=1 SV=1	19.764	16.2125	1	0	3.55156	3.88428	0.00162175	0.00319474	No	No	Yes	1.76108	3.18708
P48594	SERPINB4	3	sp|P48594|SPB4_HUMAN Serpin B4 OS=Homo sapiens OX=9606 GN=SERPINB4 PE=1 SV=2	20.2585	16.1434	1	0	4.11508	4.5006	0.00014224	0.00117234	No	No	No		3.48088
P48643	CCT5	45	sp|P48643|TCPE_HUMAN T-complex protein 1 subunit epsilon OS=Homo sapiens OX=9606 GN=CCT5 PE=1 SV=1	23.4397	16.2215	1	0	7.21827	7.89452	4.49001e-05	0.00117234	No	No	Yes	2.53317	3.25968
P48735	IDH2	20	sp|P48735|IDHP_HUMAN Isocitrate dehydrogenase [NADP], mitochondrial OS=Homo sapiens OX=9606 GN=IDH2 PE=1 SV=2	20.9328	16.2149	4	0	4.71786	5.15985	0.00741231	0.0128961	Yes	Yes	Yes	1.67956	3.05737
P49006	MARCKSL1	10	sp|P49006|MRP_HUMAN MARCKS-related protein OS=Homo sapiens OX=9606 GN=MARCKSL1 PE=1 SV=2	21.0532	16.1519	1	0	4.90129	5.36046	0.00040468	0.00140801	No	No	Yes	2.04934
P49189	ALDH9A1	17	sp|P49189|AL9A1_HUMAN 4-trimethylaminobutyraldehyde dehydrogenase OS=Homo sapiens OX=9606 GN=ALDH9A1 PE=1 SV=3	20.5536	16.1811	1	0	4.37259	4.78223	0.000275502	0.00127566	No	No	Yes	1.98677	3.11724
P49207	RPL34	11	sp|P49207|RL34_HUMAN 60S ribosomal protein L34 OS=Homo sapiens OX=9606 GN=RPL34 PE=1 SV=3	22.8037	23.6955	4	4	-0.891839	-0.97539	0.0870251	0.123031	No	No	Yes	2.95992	2.50954
P49321	NASP	26	sp|P49321|NASP_HUMAN Nuclear autoantigenic sperm protein OS=Homo sapiens OX=9606 GN=NASP PE=1 SV=2	21.1628	16.1739	2	0	4.98886	5.45623	0.00491825	0.00885466	Yes	Yes	No		2.78904
P49327	FASN	136	sp|P49327|FAS_HUMAN Fatty acid synthase OS=Homo sapiens OX=9606 GN=FASN PE=1 SV=3	23.2723	21.5739	4	2	1.69833	1.85744	0.0921974	0.129287	No	No	Yes	1.94135	4.08916
P49368	CCT3	42	sp|P49368|TCPG_HUMAN T-complex protein 1 subunit gamma OS=Homo sapiens OX=9606 GN=CCT3 PE=1 SV=4	20.705	19.3781	4	2	1.32694	1.45125	0.189807	0.246148	No	No	Yes	2.59447	3.11863
P49411	TUFM	40	sp|P49411|EFTU_HUMAN Elongation factor Tu, mitochondrial OS=Homo sapiens OX=9606 GN=TUFM PE=1 SV=2	24.652	21.024	4	3	3.62798	3.96786	0.0933382	0.1307	No	No	Yes	2.08638	3.23148
P49419	ALDH7A1	29	sp|P49419|AL7A1_HUMAN Alpha-aminoadipic semialdehyde dehydrogenase OS=Homo sapiens OX=9606 GN=ALDH7A1 PE=1 SV=5	19.5013	16.1728	3	0	3.3285	3.64033	0.0340974	0.0532873	No	No	Yes	1.98293	3.46784
P49588	AARS	47	sp|P49588|SYAC_HUMAN Alanine--tRNA ligase, cytoplasmic OS=Homo sapiens OX=9606 GN=AARS1 PE=1 SV=2	19.8066	16.1696	2	0	3.63706	3.9778	0.000780292	0.00186695	Yes	Yes	Yes	2.07993	3.62829
P49591	SARS	19	sp|P49591|SYSC_HUMAN Serine--tRNA ligase, cytoplasmic OS=Homo sapiens OX=9606 GN=SARS1 PE=1 SV=3	18.8084	16.1327	1	0	2.67578	2.92646	0.00188952	0.00365629	No	No	Yes	2.30563	3.11427
P49720	PSMB3	10	sp|P49720|PSB3_HUMAN Proteasome subunit beta type-3 OS=Homo sapiens OX=9606 GN=PSMB3 PE=1 SV=2	20.6377	16.131	1	0	4.50672	4.92893	0.000144321	0.00117234	No	No	Yes	1.55554	3.01895
P49721	PSMB2	8	sp|P49721|PSB2_HUMAN Proteasome subunit beta type-2 OS=Homo sapiens OX=9606 GN=PSMB2 PE=1 SV=1	20.1394	16.1476	1	0	3.99176	4.36573	0.00038539	0.00140473	No	No	Yes	1.98865	3.23394
P49736	MCM2	42	sp|P49736|MCM2_HUMAN DNA replication licensing factor MCM2 OS=Homo sapiens OX=9606 GN=MCM2 PE=1 SV=4	20.2895	16.2165	2	0	4.07295	4.45452	0.00114677	0.00240357	Yes	Yes	Yes	2.15525	3.49798
P49755	TMED10	12	sp|P49755|TMEDA_HUMAN Transmembrane emp24 domain-containing protein 10 OS=Homo sapiens OX=9606 GN=TMED10 PE=1 SV=2	20.1407	16.1427	1	0	3.99801	4.37256	9.52641e-05	0.00117234	No	No	Yes	2.37576	3.48361
P49756	RBM25	33	sp|P49756|RBM25_HUMAN RNA-binding protein 25 OS=Homo sapiens OX=9606 GN=RBM25 PE=1 SV=3	19.9213	20.6061	1	1	-0.68474	-0.74889	0.0558536	0.0829367	No	No	Yes	2.58208	2.99475
P49773	HINT1	12	sp|P49773|HINT1_HUMAN Histidine triad nucleotide-binding protein 1 OS=Homo sapiens OX=9606 GN=HINT1 PE=1 SV=2	21.4368	16.1298	1	0	5.30703	5.80422	0.000448103	0.00143553	No	No	Yes	2.66874	1.2531
P49792	RANBP2	63	sp|P49792|RBP2_HUMAN E3 SUMO-protein ligase RanBP2 OS=Homo sapiens OX=9606 GN=RANBP2 PE=1 SV=2	16.7143	20.4679	0	1	-3.75356	-4.10521	0.000520324	0.0015268	No	No	Yes	1.9027	3.93329
P49915	GMPS	34	sp|P49915|GUAA_HUMAN GMP synthase [glutamine-hydrolyzing] OS=Homo sapiens OX=9606 GN=GMPS PE=1 SV=1	20.4706	16.2168	1	0	4.25379	4.65231	0.000422761	0.00142418	No	No	Yes	1.92572	3.4632
P50213	IDH3A	19	sp|P50213|IDH3A_HUMAN Isocitrate dehydrogenase [NAD] subunit alpha, mitochondrial OS=Homo sapiens OX=9606 GN=IDH3A PE=1 SV=1	21.3751	19.0899	4	1	2.28515	2.49923	0.000107286	0.00117234	Yes	Yes	Yes	1.67835	2.97878
P50395	GDI2	20	sp|P50395|GDIB_HUMAN Rab GDP dissociation inhibitor beta OS=Homo sapiens OX=9606 GN=GDI2 PE=1 SV=2	23.161	16.1495	1	0	7.01154	7.66841	8.64478e-05	0.00117234	No	No	Yes	2.15128	3.44161
P50402	EMD	16	sp|P50402|EMD_HUMAN Emerin OS=Homo sapiens OX=9606 GN=EMD PE=1 SV=1	19.751	21.1521	2	1	-1.40108	-1.53234	0.0389093	0.0597623	No	No	Yes	1.87629	3.18206
P50454	SERPINH1	26	sp|P50454|SERPH_HUMAN Serpin H1 OS=Homo sapiens OX=9606 GN=SERPINH1 PE=1 SV=2	22.9021	16.2022	1	0	6.69982	7.32749	0.00018915	0.00117234	No	No	Yes	1.75373	3.58064
P50502	ST13	17	sp|P50502|F10A1_HUMAN Hsc70-interacting protein OS=Homo sapiens OX=9606 GN=ST13 PE=1 SV=2;sp|Q8NFI4|F10A5_HUMAN Putative protein FAM10A5 OS=Homo sapiens OX=9606 GN=ST13P5 PE=5 SV=1;sp|Q8IZP2|ST134_HUMAN Putative protein FAM10A4 OS=Homo sapiens OX=9606 GN=S	19.1974	19.3435	3	1	-0.146034	-0.159715	0.901062	0.92169	No	No	Yes	2.44202	2.31691
P50914	RPL14	14	sp|P50914|RL14_HUMAN 60S ribosomal protein L14 OS=Homo sapiens OX=9606 GN=RPL14 PE=1 SV=4	21.5525	21.5096	4	4	0.042885	0.0469026	0.92643	0.942734	No	No	Yes	2.85454	2.7794
P50990	CCT8	54	sp|P50990|TCPQ_HUMAN T-complex protein 1 subunit theta OS=Homo sapiens OX=9606 GN=CCT8 PE=1 SV=4	21.1893	19.8296	4	2	1.35977	1.48716	0.186676	0.242728	No	No	Yes	2.42156	3.28215
P50991	CCT4	39	sp|P50991|TCPD_HUMAN T-complex protein 1 subunit delta OS=Homo sapiens OX=9606 GN=CCT4 PE=1 SV=4	21.2607	20.4248	4	2	0.835894	0.914205	0.214125	0.271944	No	No	Yes	2.32	3.3232
P51114	FXR1	23	sp|P51114|FXR1_HUMAN Fragile X mental retardation syndrome-related protein 1 OS=Homo sapiens OX=9606 GN=FXR1 PE=1 SV=3	20.0156	20.1665	1	1	-0.150835	-0.164966	0.680461	0.74487	No	No	Yes	2.18733	2.9799
P51148	RAB5C	7	sp|P51148|RAB5C_HUMAN Ras-related protein Rab-5C OS=Homo sapiens OX=9606 GN=RAB5C PE=1 SV=2	21.5408	16.2023	1	0	5.33846	5.83859	0.000146566	0.00117234	No	No	Yes	1.68152	3.19601
P51149	RAB7A	17	sp|P51149|RAB7A_HUMAN Ras-related protein Rab-7a OS=Homo sapiens OX=9606 GN=RAB7A PE=1 SV=1	22.3332	16.2173	1	0	6.11584	6.6888	0.000198192	0.00117995	No	No	Yes	2.03897	2.89663
P51570	GALK1	17	sp|P51570|GALK1_HUMAN Galactokinase OS=Homo sapiens OX=9606 GN=GALK1 PE=1 SV=1	19.2405	16.152	1	0	3.0885	3.37784	0.000914616	0.00203081	No	No	Yes	1.27095	3.2011
P51571	SSR4	7	sp|P51571|SSRD_HUMAN Translocon-associated protein subunit delta OS=Homo sapiens OX=9606 GN=SSR4 PE=1 SV=1	21.336	16.1306	1	0	5.20547	5.69315	0.000263532	0.00127566	No	No	Yes	2.13937	3.42475
P51610	HCFC1	41	sp|P51610|HCFC1_HUMAN Host cell factor 1 OS=Homo sapiens OX=9606 GN=HCFC1 PE=1 SV=2	19.7394	16.2142	1	0	3.52519	3.85545	0.000510477	0.00150239	No	No	Yes	2.07355	3.68253
P51659	HSD17B4	46	sp|P51659|DHB4_HUMAN Peroxisomal multifunctional enzyme type 2 OS=Homo sapiens OX=9606 GN=HSD17B4 PE=1 SV=3	20.1227	16.1029	4	0	4.01978	4.39638	0.00290282	0.00541456	Yes	Yes	Yes	1.9531	3.52318
P51665	PSMD7	12	sp|P51665|PSMD7_HUMAN 26S proteasome non-ATPase regulatory subunit 7 OS=Homo sapiens OX=9606 GN=PSMD7 PE=1 SV=2	21.2893	16.1879	1	0	5.10142	5.57934	0.000440862	0.00143331	No	No	Yes	2.04817	3.43229
P51858	HDGF	14	sp|P51858|HDGF_HUMAN Hepatoma-derived growth factor OS=Homo sapiens OX=9606 GN=HDGF PE=1 SV=1	22.2417	16.2374	1	0	6.00428	6.56679	6.66016e-05	0.00117234	No	No	Yes	2.43989	2.668
P51991	HNRNPA3	36	sp|P51991|ROA3_HUMAN Heterogeneous nuclear ribonucleoprotein A3 OS=Homo sapiens OX=9606 GN=HNRNPA3 PE=1 SV=2	22.7349	21.5603	4	4	1.17461	1.28465	0.102399	0.142107	No	No	Yes	2.26445	2.95873
P52209	PGD	30	sp|P52209|6PGD_HUMAN 6-phosphogluconate dehydrogenase, decarboxylating OS=Homo sapiens OX=9606 GN=PGD PE=1 SV=3	22.3116	16.2254	1	0	6.08628	6.65647	8.83007e-05	0.00117234	No	No	Yes	1.48884	3.29146
P52272	HNRNPM	75	sp|P52272|HNRPM_HUMAN Heterogeneous nuclear ribonucleoprotein M OS=Homo sapiens OX=9606 GN=HNRNPM PE=1 SV=3	24.6702	21.9506	4	4	2.71967	2.97446	0.0108789	0.0184698	Yes	Yes	Yes	2.63064	3.02742
P52292	KPNA2	29	sp|P52292|IMA1_HUMAN Importin subunit alpha-1 OS=Homo sapiens OX=9606 GN=KPNA2 PE=1 SV=1	21.7339	20.713	4	1	1.02086	1.11649	0.107278	0.148319	No	No	No		3.44922
P52565	ARHGDIA	13	sp|P52565|GDIR1_HUMAN Rho GDP-dissociation inhibitor 1 OS=Homo sapiens OX=9606 GN=ARHGDIA PE=1 SV=3	22.1952	16.1122	1	0	6.08305	6.65294	7.70625e-05	0.00117234	No	No	Yes	1.64431	2.94798
P52597	HNRNPF	22	sp|P52597|HNRPF_HUMAN Heterogeneous nuclear ribonucleoprotein F OS=Homo sapiens OX=9606 GN=HNRNPF PE=1 SV=3	22.2242	20.4338	4	2	1.79038	1.95811	0.00438097	0.00797498	Yes	Yes	Yes	2.25509	2.29321
P52732	KIF11	39	sp|P52732|KIF11_HUMAN Kinesin-like protein KIF11 OS=Homo sapiens OX=9606 GN=KIF11 PE=1 SV=2	18.11	17.9934	1	1	0.116606	0.12753	0.672788	0.739766	No	No	Yes	2.04357	3.33883
P52907	CAPZA1	14	sp|P52907|CAZA1_HUMAN F-actin-capping protein subunit alpha-1 OS=Homo sapiens OX=9606 GN=CAPZA1 PE=1 SV=3	21.5933	18.1902	1	1	3.40306	3.72187	7.43241e-05	0.00117234	No	No	Yes	2.26233	2.4812
P53007	SLC25A1	15	sp|P53007|TXTP_HUMAN Tricarboxylate transport protein, mitochondrial OS=Homo sapiens OX=9606 GN=SLC25A1 PE=1 SV=2	21.0714	21.4601	1	1	-0.388689	-0.425103	0.265431	0.3293	No	No	Yes	1.61532	3.3391
P53350	PLK1	23	sp|P53350|PLK1_HUMAN Serine/threonine-protein kinase PLK1 OS=Homo sapiens OX=9606 GN=PLK1 PE=1 SV=1	20.1604	19.7728	4	2	0.387627	0.423942	0.285294	0.35276	No	No	Yes	1.84733	3.40415
P53396	ACLY	57	sp|P53396|ACLY_HUMAN ATP-citrate synthase OS=Homo sapiens OX=9606 GN=ACLY PE=1 SV=3	22.2265	16.1464	2	0	6.08015	6.64976	0.00305821	0.00568284	Yes	Yes	Yes	2.18767	3.78326
P53597	SUCLG1	15	sp|P53597|SUCA_HUMAN Succinate--CoA ligase [ADP/GDP-forming] subunit alpha, mitochondrial OS=Homo sapiens OX=9606 GN=SUCLG1 PE=1 SV=4	19.9593	16.1811	1	0	3.77818	4.13214	0.000454466	0.00143646	No	No	Yes	2.08171	3.04971
P53618	COPB1	34	sp|P53618|COPB_HUMAN Coatomer subunit beta OS=Homo sapiens OX=9606 GN=COPB1 PE=1 SV=3	19.6705	16.1749	1	0	3.49563	3.82312	0.000341152	0.00132675	No	No	Yes	2.03663	3.86871
P53621	COPA	58	sp|P53621|COPA_HUMAN Coatomer subunit alpha OS=Homo sapiens OX=9606 GN=COPA PE=1 SV=2	20.2874	16.1713	2	0	4.11619	4.50181	0.000406736	0.00140801	Yes	Yes	Yes	1.99088	3.62987
P53985	SLC16A1	8	sp|P53985|MOT1_HUMAN Monocarboxylate transporter 1 OS=Homo sapiens OX=9606 GN=SLC16A1 PE=1 SV=3	21.5334	16.2436	1	0	5.2898	5.78538	0.000533457	0.00154503	No	No	Yes	2.62724	4.11127
P53999	SUB1	12	sp|P53999|TCP4_HUMAN Activated RNA polymerase II transcriptional coactivator p15 OS=Homo sapiens OX=9606 GN=SUB1 PE=1 SV=3	20.9934	20.1719	2	1	0.821549	0.898515	0.0414059	0.0633001	No	No	Yes	2.13764	0.825426
P54136	RARS	42	sp|P54136|SYRC_HUMAN Arginine--tRNA ligase, cytoplasmic OS=Homo sapiens OX=9606 GN=RARS1 PE=1 SV=2	21.2426	20.4516	2	1	0.790927	0.865024	0.141239	0.189152	No	No	Yes	2.27893	3.40214
P54577	YARS	47	sp|P54577|SYYC_HUMAN Tyrosine--tRNA ligase, cytoplasmic OS=Homo sapiens OX=9606 GN=YARS1 PE=1 SV=4	20.3305	16.1657	4	0	4.16477	4.55494	0.00351422	0.00649338	Yes	Yes	Yes	2.28256	3.13421
P54578	USP14	25	sp|P54578|UBP14_HUMAN Ubiquitin carboxyl-terminal hydrolase 14 OS=Homo sapiens OX=9606 GN=USP14 PE=1 SV=3	19.6276	16.1626	1	0	3.46509	3.78971	0.00157907	0.00313249	No	No	Yes	2.00772	3.2435
P54709	ATP1B3	15	sp|P54709|AT1B3_HUMAN Sodium/potassium-transporting ATPase subunit beta-3 OS=Homo sapiens OX=9606 GN=ATP1B3 PE=1 SV=1	19.6663	16.1301	1	0	3.53623	3.86752	0.000733435	0.00182062	No	No	Yes	2.49817	3.35072
P54727	RAD23B	14	sp|P54727|RD23B_HUMAN UV excision repair protein RAD23 homolog B OS=Homo sapiens OX=9606 GN=RAD23B PE=1 SV=1	19.8904	16.1999	1	0	3.69048	4.03622	0.000610739	0.0016314	No	No	Yes	2.10735	3.11525
P54819	AK2	20	sp|P54819|KAD2_HUMAN Adenylate kinase 2, mitochondrial OS=Homo sapiens OX=9606 GN=AK2 PE=1 SV=2	22.1884	16.2326	1	0	5.95583	6.5138	0.000309544	0.00130773	No	No	Yes	2.12431	2.99628
P54886	ALDH18A1	47	sp|P54886|P5CS_HUMAN Delta-1-pyrroline-5-carboxylate synthase OS=Homo sapiens OX=9606 GN=ALDH18A1 PE=1 SV=2	23.5492	20.8675	4	2	2.68172	2.93295	0.00821859	0.0142234	Yes	Yes	Yes	1.70214	3.38498
P55036	PSMD4	10	sp|P55036|PSMD4_HUMAN 26S proteasome non-ATPase regulatory subunit 4 OS=Homo sapiens OX=9606 GN=PSMD4 PE=1 SV=1	19.7181	16.1868	1	0	3.53132	3.86215	0.00163946	0.00322318	No	No	Yes	2.39777	2.96466
P55060	CSE1L	47	sp|P55060|XPO2_HUMAN Exportin-2 OS=Homo sapiens OX=9606 GN=CSE1L PE=1 SV=3	21.2778	21.6284	4	1	-0.350573	-0.383416	0.728505	0.777708	No	No	Yes	2.1007	3.89918
P55072	VCP	67	sp|P55072|TERA_HUMAN Transitional endoplasmic reticulum ATPase OS=Homo sapiens OX=9606 GN=VCP PE=1 SV=4	24.7856	16.1797	1	0	8.60589	9.41212	0.000104475	0.00117234	No	No	Yes	2.04234	3.40884
P55084	HADHB	35	sp|P55084|ECHB_HUMAN Trifunctional enzyme subunit beta, mitochondrial OS=Homo sapiens OX=9606 GN=HADHB PE=1 SV=3	21.6389	16.1304	4	0	5.50851	6.02457	0.000841481	0.00192366	Yes	Yes	Yes	1.74815	3.14006
P55209	NAP1L1	14	sp|P55209|NP1L1_HUMAN Nucleosome assembly protein 1-like 1 OS=Homo sapiens OX=9606 GN=NAP1L1 PE=1 SV=1	23.3012	18.658	1	1	4.64326	5.07826	6.82501e-06	0.000838624	No	No	No		3.10167
P55265	ADAR	50	sp|P55265|DSRAD_HUMAN Double-stranded RNA-specific adenosine deaminase OS=Homo sapiens OX=9606 GN=ADAR PE=1 SV=4	19.9096	18.8207	3	1	1.08897	1.19098	0.325912	0.397389	No	No	Yes	1.92466	3.24579
P55786	NPEPPS	36	sp|P55786|PSA_HUMAN Puromycin-sensitive aminopeptidase OS=Homo sapiens OX=9606 GN=NPEPPS PE=1 SV=2	20.7457	16.1682	1	0	4.57752	5.00636	0.000549531	0.00155755	No	No	Yes	2.12115	3.59996
P55795	HNRNPH2	10	sp|P55795|HNRH2_HUMAN Heterogeneous nuclear ribonucleoprotein H2 OS=Homo sapiens OX=9606 GN=HNRNPH2 PE=1 SV=1	19.6786	16.2012	3	0	3.47733	3.80311	0.0330319	0.0517679	No	No	Yes	1.77292	2.16026
P55884	EIF3B	34	sp|P55884|EIF3B_HUMAN Eukaryotic translation initiation factor 3 subunit B OS=Homo sapiens OX=9606 GN=EIF3B PE=1 SV=3	20.1478	16.1685	1	0	3.97933	4.35213	0.000812219	0.00189197	No	No	Yes	1.80597	3.59827
P56192	MARS	31	sp|P56192|SYMC_HUMAN Methionine--tRNA ligase, cytoplasmic OS=Homo sapiens OX=9606 GN=MARS1 PE=1 SV=2	19.6635	20.1465	1	1	-0.482964	-0.528211	0.236312	0.296673	No	No	Yes	2.05114	3.72188
P56537	EIF6	7	sp|P56537|IF6_HUMAN Eukaryotic translation initiation factor 6 OS=Homo sapiens OX=9606 GN=EIF6 PE=1 SV=1	21.0503	16.1441	1	0	4.90612	5.36574	0.000461523	0.00144707	No	No	Yes	1.71625	3.13231
P58107	EPPK1	5	sp|P58107|EPIPL_HUMAN Epiplakin OS=Homo sapiens OX=9606 GN=EPPK1 PE=1 SV=3	19.8757	16.1714	1	0	3.70432	4.05135	0.000901849	0.00201024	No	No	Yes	-0.0347055	4.15365
P58876	HIST1H2BD	1	sp|P58876|H2B1D_HUMAN Histone H2B type 1-D OS=Homo sapiens OX=9606 GN=H2BC5 PE=1 SV=2	16.6938	20.5332	0	1	-3.83941	-4.1991	0.000191069	0.00117234	No	No	Yes	1.12406	2.60275
P60174	TPI1	26	sp|P60174|TPIS_HUMAN Triosephosphate isomerase OS=Homo sapiens OX=9606 GN=TPI1 PE=1 SV=3	21.4279	19.2494	4	4	2.17849	2.38258	0.129076	0.175251	No	No	Yes	2.35847	3.03078
P60660	MYL6	5	sp|P60660|MYL6_HUMAN Myosin light polypeptide 6 OS=Homo sapiens OX=9606 GN=MYL6 PE=1 SV=2	22.1412	16.1659	1	0	5.97535	6.53514	0.0003113	0.00130773	No	No	Yes	2.1828	2.66492
P60842	EIF4A1	23	sp|P60842|IF4A1_HUMAN Eukaryotic initiation factor 4A-I OS=Homo sapiens OX=9606 GN=EIF4A1 PE=1 SV=1	24.4205	21.5424	4	4	2.8781	3.14773	0.0162142	0.0270604	Yes	Yes	Yes	0.703776	3.4072
P60866	RPS20	10	sp|P60866|RS20_HUMAN 40S ribosomal protein S20 OS=Homo sapiens OX=9606 GN=RPS20 PE=1 SV=1	21.9454	21.9033	4	4	0.0420781	0.0460201	0.930064	0.943501	No	No	Yes	2.70271	1.15168
P60891	PRPS1	5	sp|P60891|PRPS1_HUMAN Ribose-phosphate pyrophosphokinase 1 OS=Homo sapiens OX=9606 GN=PRPS1 PE=1 SV=2;sp|P21108|PRPS3_HUMAN Ribose-phosphate pyrophosphokinase 3 OS=Homo sapiens OX=9606 GN=PRPS1L1 PE=1 SV=2	20.9199	16.2146	2	0	4.70533	5.14615	0.00209656	0.00400956	Yes	Yes	Yes	1.95615	3.10647
P60900	PSMA6	13	sp|P60900|PSA6_HUMAN Proteasome subunit alpha type-6 OS=Homo sapiens OX=9606 GN=PSMA6 PE=1 SV=1	21.3617	16.123	1	0	5.23864	5.72942	0.000116788	0.00117234	No	No	Yes	0.282248	2.98188
P60953	CDC42	8	sp|P60953|CDC42_HUMAN Cell division control protein 42 homolog OS=Homo sapiens OX=9606 GN=CDC42 PE=1 SV=2	20.5793	16.1575	1	0	4.42185	4.83611	0.000535946	0.00154503	No	No	Yes	2.06345	3.23885
P61019	RAB2A	17	sp|P61019|RAB2A_HUMAN Ras-related protein Rab-2A OS=Homo sapiens OX=9606 GN=RAB2A PE=1 SV=1	19.9807	16.1911	1	0	3.7896	4.14462	0.000606264	0.00162386	No	No	Yes	2.12715	3.19224
P61026	RAB10	12	sp|P61026|RAB10_HUMAN Ras-related protein Rab-10 OS=Homo sapiens OX=9606 GN=RAB10 PE=1 SV=1	20.5844	16.2169	1	0	4.36744	4.7766	0.000719311	0.00180106	No	No	Yes	2.12346	3.1622
P61158	ACTR3	18	sp|P61158|ARP3_HUMAN Actin-related protein 3 OS=Homo sapiens OX=9606 GN=ACTR3 PE=1 SV=3	20.8035	16.1776	1	0	4.62592	5.0593	6.79092e-05	0.00117234	No	No	Yes	1.91836	3.3523
P61160	ACTR2	16	sp|P61160|ARP2_HUMAN Actin-related protein 2 OS=Homo sapiens OX=9606 GN=ACTR2 PE=1 SV=1	20.048	16.1478	1	0	3.90022	4.26561	0.000694971	0.00176526	No	No	Yes	2.3593	3.32582
P61163	ACTR1A	9	sp|P61163|ACTZ_HUMAN Alpha-centractin OS=Homo sapiens OX=9606 GN=ACTR1A PE=1 SV=1	20.2139	16.1107	1	0	4.10321	4.48761	0.000122542	0.00117234	No	No	Yes	1.74946	3.35443
P61221	ABCE1	27	sp|P61221|ABCE1_HUMAN ATP-binding cassette sub-family E member 1 OS=Homo sapiens OX=9606 GN=ABCE1 PE=1 SV=1	20.4657	16.1782	1	0	4.28756	4.68924	0.000410884	0.00140801	No	No	Yes	2.08718	3.46934
P61224	RAP1B	5	sp|P61224|RAP1B_HUMAN Ras-related protein Rap-1b OS=Homo sapiens OX=9606 GN=RAP1B PE=1 SV=1;sp|A6NIZ1|RP1BL_HUMAN Ras-related protein Rap-1b-like protein OS=Homo sapiens OX=9606 PE=2 SV=1	21.8192	16.2128	1	0	5.60634	6.13157	0.000572464	0.00158071	No	No	Yes	1.61855	3.20371
P61247	RPS3A	33	sp|P61247|RS3A_HUMAN 40S ribosomal protein S3a OS=Homo sapiens OX=9606 GN=RPS3A PE=1 SV=2	20.83	22.1334	3	2	-1.30334	-1.42544	0.398867	0.472963	No	No	Yes	2.42227	1.58456
P61254	RPL26	6	sp|P61254|RL26_HUMAN 60S ribosomal protein L26 OS=Homo sapiens OX=9606 GN=RPL26 PE=1 SV=1	22.6504	22.5069	4	4	0.143534	0.156981	0.817002	0.855285	No	No	Yes	3.16285	2.64378
P61313	RPL15	22	sp|P61313|RL15_HUMAN 60S ribosomal protein L15 OS=Homo sapiens OX=9606 GN=RPL15 PE=1 SV=2	25.2848	25.5496	4	4	-0.264861	-0.289675	0.504857	0.575724	No	No	Yes	3.15813	2.94082
P61353	RPL27	12	sp|P61353|RL27_HUMAN 60S ribosomal protein L27 OS=Homo sapiens OX=9606 GN=RPL27 PE=1 SV=2	23.8666	23.7995	4	4	0.0670873	0.0733724	0.852973	0.887272	No	No	Yes	2.99946	2.7622
P61513	RPL37A	9	sp|P61513|RL37A_HUMAN 60S ribosomal protein L37a OS=Homo sapiens OX=9606 GN=RPL37A PE=1 SV=2	19.6895	21.988	3	2	-2.29855	-2.51389	0.102065	0.14191	No	No	Yes	3.30746	0.680336
P61604	HSPE1	24	sp|P61604|CH10_HUMAN 10 kDa heat shock protein, mitochondrial OS=Homo sapiens OX=9606 GN=HSPE1 PE=1 SV=2	22.5783	19.5591	2	1	3.01922	3.30208	0.0362281	0.0561706	No	No	Yes	2.12096	2.69685
P61626	LYZ	10	sp|P61626|LYSC_HUMAN Lysozyme C OS=Homo sapiens OX=9606 GN=LYZ PE=1 SV=1	21.5783	21.2377	1	2	0.340618	0.372528	0.495116	0.569238	No	No	No		3.09998
P61956	SUMO2	3	sp|P61956|SUMO2_HUMAN Small ubiquitin-related modifier 2 OS=Homo sapiens OX=9606 GN=SUMO2 PE=1 SV=3	21.6783	16.1717	2	0	5.50663	6.02251	0.000748699	0.00183077	Yes	Yes	Yes	1.85277	0.937518
P61978	HNRNPK	42	sp|P61978|HNRPK_HUMAN Heterogeneous nuclear ribonucleoprotein K OS=Homo sapiens OX=9606 GN=HNRNPK PE=1 SV=1	23.962	22.3943	4	4	1.56767	1.71454	0.0124738	0.0211045	Yes	Yes	Yes	2.82753	2.94315
P61981	YWHAG	13	sp|P61981|1433G_HUMAN 14-3-3 protein gamma OS=Homo sapiens OX=9606 GN=YWHAG PE=1 SV=2	20.3158	16.2023	1	0	4.11349	4.49886	0.00082907	0.00191309	No	No	Yes	1.92935	2.96586
P62081	RPS7	25	sp|P62081|RS7_HUMAN 40S ribosomal protein S7 OS=Homo sapiens OX=9606 GN=RPS7 PE=1 SV=1	20.602	20.9289	3	3	-0.326851	-0.357472	0.880982	0.908715	No	No	Yes	2.84234	2.8729
P62136	PPP1CA	7	sp|P62136|PP1A_HUMAN Serine/threonine-protein phosphatase PP1-alpha catalytic subunit OS=Homo sapiens OX=9606 GN=PPP1CA PE=1 SV=1	19.9388	19.6211	1	1	0.317648	0.347407	0.391256	0.464498	No	No	Yes	1.68229	3.10451
P62191	PSMC1	23	sp|P62191|PRS4_HUMAN 26S proteasome regulatory subunit 4 OS=Homo sapiens OX=9606 GN=PSMC1 PE=1 SV=1	20.8003	16.1498	1	0	4.65052	5.0862	0.000747993	0.00183077	No	No	Yes	2.16346	3.16017
P62195	PSMC5	24	sp|P62195|PRS8_HUMAN 26S proteasome regulatory subunit 8 OS=Homo sapiens OX=9606 GN=PSMC5 PE=1 SV=1	21.5229	16.2514	1	0	5.27155	5.76542	0.000115356	0.00117234	No	No	Yes	1.84246	2.88979
P62241	RPS8	20	sp|P62241|RS8_HUMAN 40S ribosomal protein S8 OS=Homo sapiens OX=9606 GN=RPS8 PE=1 SV=2	22.7023	22.9012	4	4	-0.198887	-0.217519	0.684371	0.74596	No	No	Yes	3.40691	2.65599
P62244	RPS15A	15	sp|P62244|RS15A_HUMAN 40S ribosomal protein S15a OS=Homo sapiens OX=9606 GN=RPS15A PE=1 SV=2	21.3699	21.5347	4	4	-0.164842	-0.180285	0.605524	0.673337	No	No	Yes	2.48708	3.07538
P62249	RPS16	16	sp|P62249|RS16_HUMAN 40S ribosomal protein S16 OS=Homo sapiens OX=9606 GN=RPS16 PE=1 SV=2	22.5218	22.9872	4	4	-0.465375	-0.508974	0.389339	0.462781	No	No	Yes	3.05096	2.64433
P62258	YWHAE	22	sp|P62258|1433E_HUMAN 14-3-3 protein epsilon OS=Homo sapiens OX=9606 GN=YWHAE PE=1 SV=1	21.4968	16.1504	2	0	5.3464	5.84727	0.00152586	0.00304861	Yes	Yes	Yes	2.91093	3.06125
P62263	RPS14	11	sp|P62263|RS14_HUMAN 40S ribosomal protein S14 OS=Homo sapiens OX=9606 GN=RPS14 PE=1 SV=3	21.0655	22.2559	3	4	-1.19043	-1.30195	0.460198	0.535355	No	No	Yes	2.98157	2.41214
P62266	RPS23	11	sp|P62266|RS23_HUMAN 40S ribosomal protein S23 OS=Homo sapiens OX=9606 GN=RPS23 PE=1 SV=3	22.5689	22.189	4	4	0.379812	0.415395	0.405607	0.479798	No	No	Yes	2.81817	2.73854
P62269	RPS18	22	sp|P62269|RS18_HUMAN 40S ribosomal protein S18 OS=Homo sapiens OX=9606 GN=RPS18 PE=1 SV=3	21.4392	22.3282	4	4	-0.888973	-0.972256	0.467061	0.542056	No	No	Yes	2.97743	2.81419
P62273	RPS29	4	sp|P62273|RS29_HUMAN 40S ribosomal protein S29 OS=Homo sapiens OX=9606 GN=RPS29 PE=1 SV=2	20.485	16.1716	1	0	4.31349	4.7176	0.000406671	0.00140801	No	No	Yes	3.40974	-0.0132283
P62277	RPS13	15	sp|P62277|RS13_HUMAN 40S ribosomal protein S13 OS=Homo sapiens OX=9606 GN=RPS13 PE=1 SV=2	21.5839	21.9432	4	4	-0.359266	-0.392923	0.708543	0.764542	No	No	Yes	2.69947	2.48842
P62280	RPS11	21	sp|P62280|RS11_HUMAN 40S ribosomal protein S11 OS=Homo sapiens OX=9606 GN=RPS11 PE=1 SV=3	22.8689	22.3962	4	4	0.472744	0.517032	0.484959	0.559524	No	No	Yes	2.95064	1.31366
P62314	SNRPD1	5	sp|P62314|SMD1_HUMAN Small nuclear ribonucleoprotein Sm D1 OS=Homo sapiens OX=9606 GN=SNRPD1 PE=1 SV=1	22.3919	21.7394	1	1	0.652488	0.713616	0.140919	0.188981	No	No	Yes	2.50323	1.26316
P62316	SNRPD2	14	sp|P62316|SMD2_HUMAN Small nuclear ribonucleoprotein Sm D2 OS=Homo sapiens OX=9606 GN=SNRPD2 PE=1 SV=1	22.2344	21.084	1	2	1.15037	1.25815	0.0353981	0.0552169	No	No	Yes	2.50735	2.72174
P62318	SNRPD3	9	sp|P62318|SMD3_HUMAN Small nuclear ribonucleoprotein Sm D3 OS=Homo sapiens OX=9606 GN=SNRPD3 PE=1 SV=1	21.8058	20.9139	1	1	0.891925	0.975484	0.0956647	0.133577	No	No	Yes	2.29919	2.16065
P62333	PSMC6	28	sp|P62333|PRS10_HUMAN 26S proteasome regulatory subunit 10B OS=Homo sapiens OX=9606 GN=PSMC6 PE=1 SV=1	19.9325	16.1949	2	0	3.73765	4.08781	0.000915887	0.00203081	Yes	Yes	Yes	1.54539	2.20596
P62424	RPL7A	24	sp|P62424|RL7A_HUMAN 60S ribosomal protein L7a OS=Homo sapiens OX=9606 GN=RPL7A PE=1 SV=2	23.0216	22.7977	4	4	0.223909	0.244886	0.791151	0.832657	No	No	Yes	3.0902	2.83495
P62495	ETF1	13	sp|P62495|ERF1_HUMAN Eukaryotic peptide chain release factor subunit 1 OS=Homo sapiens OX=9606 GN=ETF1 PE=1 SV=3	19.7902	16.1883	1	0	3.60193	3.93937	0.000601384	0.00162026	No	No	Yes	1.96191	3.39235
P62701	RPS4X	24	sp|P62701|RS4X_HUMAN 40S ribosomal protein S4, X isoform OS=Homo sapiens OX=9606 GN=RPS4X PE=1 SV=2	22.7887	22.7617	4	4	0.027033	0.0295656	0.975046	0.984055	No	No	Yes	3.31508	2.89245
P62750	RPL23A	20	sp|P62750|RL23A_HUMAN 60S ribosomal protein L23a OS=Homo sapiens OX=9606 GN=RPL23A PE=1 SV=1	22.4611	22.8174	4	4	-0.356371	-0.389757	0.686501	0.74596	No	No	Yes	2.87242	2.73944
P62753	RPS6	21	sp|P62753|RS6_HUMAN 40S ribosomal protein S6 OS=Homo sapiens OX=9606 GN=RPS6 PE=1 SV=1	22.2796	20.8257	4	3	1.45388	1.59009	0.374337	0.447656	No	No	Yes	3.43425	2.85075
P62805	HIST1H4A	25	sp|P62805|H4_HUMAN Histone H4 OS=Homo sapiens OX=9606 GN=H4C1 PE=1 SV=2	26.7496	28.4846	4	4	-1.735	-1.89755	0.0259413	0.0420796	Yes	Yes	No		2.86586
P62807	HIST1H2BC	0	sp|P62807|H2B1C_HUMAN Histone H2B type 1-C/E/F/G/I OS=Homo sapiens OX=9606 GN=H2BC4 PE=1 SV=4	16.7129	21.1373	0	1	-4.42437	-4.83886	0.000232987	0.00121822	No	No	Yes	0.725468	2.60275
P62820	RAB1A	12	sp|P62820|RAB1A_HUMAN Ras-related protein Rab-1A OS=Homo sapiens OX=9606 GN=RAB1A PE=1 SV=3	22.2446	16.1121	1	0	6.13245	6.70697	0.000102823	0.00117234	No	No	Yes	1.99732	2.93666
P62826	RAN	21	sp|P62826|RAN_HUMAN GTP-binding nuclear protein Ran OS=Homo sapiens OX=9606 GN=RAN PE=1 SV=3	23.3563	22.1249	4	2	1.23138	1.34674	0.0285647	0.045806	Yes	Yes	Yes	2.85989	2.78814
P62829	RPL23	14	sp|P62829|RL23_HUMAN 60S ribosomal protein L23 OS=Homo sapiens OX=9606 GN=RPL23 PE=1 SV=1	22.591	22.7669	4	4	-0.17584	-0.192313	0.72678	0.777708	No	No	Yes	3.02482	2.89782
P62841	RPS15	12	sp|P62841|RS15_HUMAN 40S ribosomal protein S15 OS=Homo sapiens OX=9606 GN=RPS15 PE=1 SV=2	20.6498	22.9606	3	2	-2.31083	-2.52732	0.177541	0.231881	No	No	Yes	2.98247	1.7629
P62847	RPS24	8	sp|P62847|RS24_HUMAN 40S ribosomal protein S24 OS=Homo sapiens OX=9606 GN=RPS24 PE=1 SV=1	21.7701	22.5055	1	1	-0.735416	-0.804313	0.100587	0.140053	No	No	Yes	3.43873	2.8312
P62851	RPS25	12	sp|P62851|RS25_HUMAN 40S ribosomal protein S25 OS=Homo sapiens OX=9606 GN=RPS25 PE=1 SV=1	22.2081	22.3783	4	4	-0.170195	-0.18614	0.786034	0.829046	No	No	Yes	2.64812	2.29623
P62854	RPS26	6	sp|P62854|RS26_HUMAN 40S ribosomal protein S26 OS=Homo sapiens OX=9606 GN=RPS26 PE=1 SV=3;sp|Q5JNZ5|RS26L_HUMAN Putative 40S ribosomal protein S26-like 1 OS=Homo sapiens OX=9606 GN=RPS26P11 PE=5 SV=1	21.055	20.3458	4	3	0.709127	0.775561	0.597954	0.665672	No	No	Yes	1.83332	1.27875
P62857	RPS28	11	sp|P62857|RS28_HUMAN 40S ribosomal protein S28 OS=Homo sapiens OX=9606 GN=RPS28 PE=1 SV=1	21.0823	16.2069	1	0	4.87537	5.33212	0.00038434	0.00140473	No	No	Yes	2.39237	1.81816
P62861	FAU	3	sp|P62861|RS30_HUMAN 40S ribosomal protein S30 OS=Homo sapiens OX=9606 GN=FAU PE=1 SV=1	20.2066	22.1016	3	2	-1.89499	-2.07253	0.174133	0.228231	No	No	Yes	2.78383
P62879	GNB2	9	sp|P62879|GBB2_HUMAN Guanine nucleotide-binding protein G(I)/G(S)/G(T) subunit beta-2 OS=Homo sapiens OX=9606 GN=GNB2 PE=1 SV=3	19.9994	20.4801	1	2	-0.480662	-0.525693	0.163553	0.216675	No	No	Yes	1.31555	2.83695
P62888	RPL30	8	sp|P62888|RL30_HUMAN 60S ribosomal protein L30 OS=Homo sapiens OX=9606 GN=RPL30 PE=1 SV=2	21.4195	21.8122	2	1	-0.392696	-0.429485	0.207408	0.264439	No	No	Yes	3.22912	2.94378
P62899	RPL31	13	sp|P62899|RL31_HUMAN 60S ribosomal protein L31 OS=Homo sapiens OX=9606 GN=RPL31 PE=1 SV=1	23.3718	23.7415	4	4	-0.369746	-0.404386	0.434374	0.510143	No	No	Yes	3.15116	2.55246
P62906	RPL10A	12	sp|P62906|RL10A_HUMAN 60S ribosomal protein L10a OS=Homo sapiens OX=9606 GN=RPL10A PE=1 SV=2	22.1722	22.9017	2	1	-0.729409	-0.797744	0.049643	0.0746163	No	No	Yes	2.8071	3.35436
P62910	RPL32	20	sp|P62910|RL32_HUMAN 60S ribosomal protein L32 OS=Homo sapiens OX=9606 GN=RPL32 PE=1 SV=2	25.9117	26.9579	4	4	-1.04616	-1.14417	0.0403146	0.0617279	No	No	Yes	3.11296	1.97474
P62913	RPL11	18	sp|P62913|RL11_HUMAN 60S ribosomal protein L11 OS=Homo sapiens OX=9606 GN=RPL11 PE=1 SV=2	21.7842	21.8276	4	4	-0.0434639	-0.0475358	0.916848	0.934918	No	No	Yes	2.98174	2.72001
P62917	RPL8	27	sp|P62917|RL8_HUMAN 60S ribosomal protein L8 OS=Homo sapiens OX=9606 GN=RPL8 PE=1 SV=2	22.7513	23.1198	4	4	-0.36853	-0.403056	0.699398	0.755504	No	No	Yes	2.96792	2.73012
P62937	PPIA	18	sp|P62937|PPIA_HUMAN Peptidyl-prolyl cis-trans isomerase A OS=Homo sapiens OX=9606 GN=PPIA PE=1 SV=2	23.6032	21.1454	4	4	2.45783	2.68809	0.00794952	0.013782	Yes	Yes	Yes	2.06161	2.07972
P62979	RPS27A	4	sp|P62979|RS27A_HUMAN Ubiquitin-40S ribosomal protein S27a OS=Homo sapiens OX=9606 GN=RPS27A PE=1 SV=2;sp|P0CG47|UBB_HUMAN Polyubiquitin-B OS=Homo sapiens OX=9606 GN=UBB PE=1 SV=1;sp|P0CG48|UBC_HUMAN Polyubiquitin-C OS=Homo sapiens OX=9606 GN=UBC PE=1 SV=3	24.502	24.3699	4	4	0.132029	0.144398	0.666192	0.73498	No	No	Yes	3.36438	1.60949
P62995	TRA2B	16	sp|P62995|TRA2B_HUMAN Transformer-2 protein homolog beta OS=Homo sapiens OX=9606 GN=TRA2B PE=1 SV=1	21.7536	19.2198	2	3	2.53379	2.77117	0.113467	0.155779	No	No	Yes	2.10643	2.98815
P63104	YWHAZ	22	sp|P63104|1433Z_HUMAN 14-3-3 protein zeta/delta OS=Homo sapiens OX=9606 GN=YWHAZ PE=1 SV=1	21.6429	21.3378	2	1	0.305092	0.333675	0.727205	0.777708	No	No	Yes	2.32769	3.08462
P63162	SNRPN	9	sp|P63162|RSMN_HUMAN Small nuclear ribonucleoprotein-associated protein N OS=Homo sapiens OX=9606 GN=SNRPN PE=1 SV=1;sp|P14678|RSMB_HUMAN Small nuclear ribonucleoprotein-associated proteins B and B OS=Homo sapiens OX=9606 GN=SNRPB PE=1 SV=2	21.8596	19.9901	2	3	1.86948	2.04462	0.205559	0.263448	No	No	No		2.81437
P63165	SUMO1	5	sp|P63165|SUMO1_HUMAN Small ubiquitin-related modifier 1 OS=Homo sapiens OX=9606 GN=SUMO1 PE=1 SV=1	21.1189	16.1654	1	0	4.95343	5.41749	0.000924438	0.00203081	No	No	Yes	1.70739	0.0569049
P63173	RPL38	7	sp|P63173|RL38_HUMAN 60S ribosomal protein L38 OS=Homo sapiens OX=9606 GN=RPL38 PE=1 SV=2	21.3565	21.8346	4	4	-0.478061	-0.522848	0.170616	0.224942	No	No	Yes	3.11778	2.85995
P63220	RPS21	9	sp|P63220|RS21_HUMAN 40S ribosomal protein S21 OS=Homo sapiens OX=9606 GN=RPS21 PE=1 SV=1	21.6731	16.1148	1	0	5.55832	6.07905	0.000302846	0.00130279	No	No	Yes	2.90961	0.0253059
P63241	EIF5A	22	sp|P63241|IF5A1_HUMAN Eukaryotic translation initiation factor 5A-1 OS=Homo sapiens OX=9606 GN=EIF5A PE=1 SV=2;sp|Q6IS14|IF5AL_HUMAN Eukaryotic translation initiation factor 5A-1-like OS=Homo sapiens OX=9606 GN=EIF5AL1 PE=2 SV=2	22.8463	20.3559	4	2	2.49039	2.72371	0.00549465	0.00981846	Yes	Yes	Yes	1.82287	2.79268
P63244	GNB2L1	24	sp|P63244|RACK1_HUMAN Receptor of activated protein C kinase 1 OS=Homo sapiens OX=9606 GN=RACK1 PE=1 SV=3	20.2673	20.9811	3	4	-0.71378	-0.780651	0.553555	0.622591	No	No	No		2.96011
P63261	ACTG1	3	sp|P63261|ACTG_HUMAN Actin, cytoplasmic 2 OS=Homo sapiens OX=9606 GN=ACTG1 PE=1 SV=1	27.2719	25.5557	4	4	1.7162	1.87698	0.000866924	0.00195967	Yes	Yes	Yes	3.21528	3.2269
P67775	PPP2CA	11	sp|P67775|PP2AA_HUMAN Serine/threonine-protein phosphatase 2A catalytic subunit alpha isoform OS=Homo sapiens OX=9606 GN=PPP2CA PE=1 SV=1;sp|P62714|PP2AB_HUMAN Serine/threonine-protein phosphatase 2A catalytic subunit beta isoform OS=Homo sapiens OX=9606 G	19.3897	16.1229	1	0	3.26681	3.57286	0.000837092	0.00191809	No	No	Yes	1.62972	3.13074
P67809	YBX1	12	sp|P67809|YBOX1_HUMAN Y-box-binding protein 1 OS=Homo sapiens OX=9606 GN=YBX1 PE=1 SV=3	23.439	22.0732	1	1	1.36583	1.49379	0.00633246	0.0111157	No	No	Yes	2.74268	0.827369
P67870	CSNK2B	8	sp|P67870|CSK2B_HUMAN Casein kinase II subunit beta OS=Homo sapiens OX=9606 GN=CSNK2B PE=1 SV=1	19.9731	16.2032	1	0	3.76991	4.12309	0.000399148	0.00140801	No	No	Yes	2.10375	2.9493
P68032	ACTC1	7	sp|P68032|ACTC_HUMAN Actin, alpha cardiac muscle 1 OS=Homo sapiens OX=9606 GN=ACTC1 PE=1 SV=1;sp|P68133|ACTS_HUMAN Actin, alpha skeletal muscle OS=Homo sapiens OX=9606 GN=ACTA1 PE=1 SV=1;sp|P63267|ACTH_HUMAN Actin, gamma-enteric smooth muscle OS=Homo sapie	22.0558	16.1917	3	0	5.86408	6.41345	0.0379421	0.0584594	No	No	No		3.20225
P68104	EEF1A1	26	sp|P68104|EF1A1_HUMAN Elongation factor 1-alpha 1 OS=Homo sapiens OX=9606 GN=EEF1A1 PE=1 SV=1;sp|Q5VTE0|EF1A3_HUMAN Putative elongation factor 1-alpha-like 3 OS=Homo sapiens OX=9606 GN=EEF1A1P5 PE=5 SV=1	26.9305	24.7658	4	4	2.16474	2.36755	0.000664976	0.00171301	Yes	Yes	Yes	1.94781	3.54809
P68363	TUBA1B	0	sp|P68363|TBA1B_HUMAN Tubulin alpha-1B chain OS=Homo sapiens OX=9606 GN=TUBA1B PE=1 SV=1	26.9323	24.3062	4	4	2.6261	2.87213	0.00656686	0.0115066	Yes	Yes	Yes	3.01666	2.80779
P68371	TUBB4B	2	sp|P68371|TBB4B_HUMAN Tubulin beta-4B chain OS=Homo sapiens OX=9606 GN=TUBB4B PE=1 SV=1	26.5836	23.8187	4	4	2.76484	3.02387	0.00297917	0.00554644	Yes	Yes	Yes	1.69923	2.83413
P68400	CSNK2A1	15	sp|P68400|CSK21_HUMAN Casein kinase II subunit alpha OS=Homo sapiens OX=9606 GN=CSNK2A1 PE=1 SV=1;sp|Q8NEV1|CSK23_HUMAN Casein kinase II subunit alpha 3 OS=Homo sapiens OX=9606 GN=CSNK2A3 PE=1 SV=2	21.2253	16.1774	1	0	5.04789	5.52079	0.000205125	0.00118099	No	No	Yes	2.09186	3.01795
P68402	PAFAH1B2	7	sp|P68402|PA1B2_HUMAN Platelet-activating factor acetylhydrolase IB subunit beta OS=Homo sapiens OX=9606 GN=PAFAH1B2 PE=1 SV=1	20.7231	16.1592	1	0	4.5639	4.99147	0.000360399	0.00136784	No	No	Yes	2.01579	3.06427
P68871	HBB	2	sp|P68871|HBB_HUMAN Hemoglobin subunit beta OS=Homo sapiens OX=9606 GN=HBB PE=1 SV=2;sp|P02042|HBD_HUMAN Hemoglobin subunit delta OS=Homo sapiens OX=9606 GN=HBD PE=1 SV=2	16.7277	19.3753	0	1	-2.64757	-2.8956	0.000380857	0.00140262	No	No	No		2.90308
P69905	HBA1	2	sp|P69905|HBA_HUMAN Hemoglobin subunit alpha OS=Homo sapiens OX=9606 GN=HBA1 PE=1 SV=2	16.7632	17.533	0	1	-0.769857	-0.841981	0.00172449	0.00337012	No	No	No		2.97899
P78344	EIF4G2	40	sp|P78344|IF4G2_HUMAN Eukaryotic translation initiation factor 4 gamma 2 OS=Homo sapiens OX=9606 GN=EIF4G2 PE=1 SV=1	19.698	16.1408	1	0	3.55722	3.89048	0.000321119	0.00131525	No	No	Yes	2.48994	3.53129
P78347	GTF2I	50	sp|P78347|GTF2I_HUMAN General transcription factor II-I OS=Homo sapiens OX=9606 GN=GTF2I PE=1 SV=2	19.1229	18.4514	3	1	0.671456	0.734361	0.426689	0.501717	No	No	Yes	1.05545	3.30297
P78371	CCT2	49	sp|P78371|TCPB_HUMAN T-complex protein 1 subunit beta OS=Homo sapiens OX=9606 GN=CCT2 PE=1 SV=4	22.6635	20.4532	2	1	2.21037	2.41745	0.0471953	0.0712641	No	No	Yes	2.50822	3.14523
P78527	PRKDC	214	sp|P78527|PRKDC_HUMAN DNA-dependent protein kinase catalytic subunit OS=Homo sapiens OX=9606 GN=PRKDC PE=1 SV=3	20.5984	19.0895	4	1	1.50885	1.6502	0.305677	0.374664	No	No	Yes	2.26157	4.37189
P81605	DCD	6	sp|P81605|DCD_HUMAN Dermcidin OS=Homo sapiens OX=9606 GN=DCD PE=1 SV=2	22.5222	22.7931	4	4	-0.270846	-0.29622	0.530573	0.601561	No	No	No		3.20049
P82979	SARNP	12	sp|P82979|SARNP_HUMAN SAP domain-containing ribonucleoprotein OS=Homo sapiens OX=9606 GN=SARNP PE=1 SV=3	21.2693	16.159	1	0	5.11034	5.5891	0.000118721	0.00117234	No	No	Yes	1.207	1.80127
P83731	RPL24	14	sp|P83731|RL24_HUMAN 60S ribosomal protein L24 OS=Homo sapiens OX=9606 GN=RPL24 PE=1 SV=1	22.5587	21.963	4	4	0.595708	0.651517	0.17249	0.226378	No	No	Yes	2.88966	2.18696
P83881	RPL36A	3	sp|P83881|RL36A_HUMAN 60S ribosomal protein L36a OS=Homo sapiens OX=9606 GN=RPL36A PE=1 SV=2	19.4575	20.7313	3	2	-1.27387	-1.39321	0.197933	0.254853	No	No	Yes	2.90726	0.762679
P84077	ARF1	11	sp|P84077|ARF1_HUMAN ADP-ribosylation factor 1 OS=Homo sapiens OX=9606 GN=ARF1 PE=1 SV=2;sp|P61204|ARF3_HUMAN ADP-ribosylation factor 3 OS=Homo sapiens OX=9606 GN=ARF3 PE=1 SV=2	21.5891	20.3079	4	1	1.28121	1.40124	0.012522	0.0211497	Yes	Yes	Yes	2.709	3.2508
P84085	ARF5	5	sp|P84085|ARF5_HUMAN ADP-ribosylation factor 5 OS=Homo sapiens OX=9606 GN=ARF5 PE=1 SV=2	18.8473	16.1856	1	0	2.66165	2.91101	0.00207433	0.00398255	No	No	Yes	-0.422496	3.30712
P84090	ERH	8	sp|P84090|ERH_HUMAN Enhancer of rudimentary homolog OS=Homo sapiens OX=9606 GN=ERH PE=1 SV=1	21.2481	16.2009	1	0	5.04725	5.5201	0.000186008	0.00117234	No	No	Yes	2.43218	2.89479
P84098	RPL19	15	sp|P84098|RL19_HUMAN 60S ribosomal protein L19 OS=Homo sapiens OX=9606 GN=RPL19 PE=1 SV=1	21.6501	21.493	4	4	0.157112	0.171831	0.771951	0.816822	No	No	Yes	2.95664
P84103	SRSF3	14	sp|P84103|SRSF3_HUMAN Serine/arginine-rich splicing factor 3 OS=Homo sapiens OX=9606 GN=SRSF3 PE=1 SV=1	23.2334	23.9617	4	4	-0.728321	-0.796554	0.116599	0.159633	No	No	Yes	2.60177	1.56703
P98179	RBM3	11	sp|P98179|RBM3_HUMAN RNA-binding protein 3 OS=Homo sapiens OX=9606 GN=RBM3 PE=1 SV=1	20.3572	16.1805	1	0	4.17666	4.56795	0.000727784	0.00181576	No	No	Yes	2.52675	2.63677
P99999	CYCS	10	sp|P99999|CYC_HUMAN Cytochrome c OS=Homo sapiens OX=9606 GN=CYCS PE=1 SV=2	22.2761	16.2047	1	0	6.07141	6.64021	0.000286325	0.00127935	No	No	Yes	2.15281	2.50225
Q00059	TFAM	16	sp|Q00059|TFAM_HUMAN Transcription factor A, mitochondrial OS=Homo sapiens OX=9606 GN=TFAM PE=1 SV=1	20.4202	16.1902	1	0	4.23005	4.62634	0.000919134	0.00203081	No	No	Yes	2.42802	2.61575
Q00325	SLC25A3	19	sp|Q00325|MPCP_HUMAN Phosphate carrier protein, mitochondrial OS=Homo sapiens OX=9606 GN=SLC25A3 PE=1 SV=2	22.6926	19.8075	1	2	2.88517	3.15547	0.000116775	0.00117234	No	No	Yes	2.54479	3.7094
Q00341	HDLBP	41	sp|Q00341|VIGLN_HUMAN Vigilin OS=Homo sapiens OX=9606 GN=HDLBP PE=1 SV=2	19.702	19.1939	1	1	0.508123	0.555727	0.185567	0.241606	No	No	Yes	2.24571	3.30049
Q00610	CLTC	86	sp|Q00610|CLH1_HUMAN Clathrin heavy chain 1 OS=Homo sapiens OX=9606 GN=CLTC PE=1 SV=5	21.3531	20.298	4	4	1.05507	1.15392	0.458051	0.533678	No	No	Yes	2.28263	4.00245
Q00688	FKBP3	16	sp|Q00688|FKBP3_HUMAN Peptidyl-prolyl cis-trans isomerase FKBP3 OS=Homo sapiens OX=9606 GN=FKBP3 PE=1 SV=1	23.2284	16.1684	1	0	7.06004	7.72146	0.000309793	0.00130773	No	No	Yes	2.61971	1.98028
Q00839	HNRNPU	70	sp|Q00839|HNRPU_HUMAN Heterogeneous nuclear ribonucleoprotein U OS=Homo sapiens OX=9606 GN=HNRNPU PE=1 SV=6	25.2018	23.3408	4	4	1.86102	2.03537	0.0103231	0.0175868	Yes	Yes	Yes	2.7259	3.12577
Q01105	SET	16	sp|Q01105|SET_HUMAN Protein SET OS=Homo sapiens OX=9606 GN=SET PE=1 SV=3;sp|P0DME0|SETLP_HUMAN Protein SETSIP OS=Homo sapiens OX=9606 GN=SETSIP PE=1 SV=1	22.6237	16.1648	1	0	6.45894	7.06405	3.18039e-05	0.00117234	No	No	Yes	2.84543	2.99551
Q01130	SRSF2	9	sp|Q01130|SRSF2_HUMAN Serine/arginine-rich splicing factor 2 OS=Homo sapiens OX=9606 GN=SRSF2 PE=1 SV=4	22.0371	21.9785	2	2	0.0585525	0.0640379	0.88269	0.909522	No	No	Yes	2.49528	0.945961
Q01469	FABP5	15	sp|Q01469|FABP5_HUMAN Fatty acid-binding protein 5 OS=Homo sapiens OX=9606 GN=FABP5 PE=1 SV=3	21.3346	21.6215	4	4	-0.286855	-0.313729	0.686315	0.74596	No	No	Yes	1.16793	1.33041
Q01518	CAP1	34	sp|Q01518|CAP1_HUMAN Adenylyl cyclase-associated protein 1 OS=Homo sapiens OX=9606 GN=CAP1 PE=1 SV=5	19.7729	16.1425	1	0	3.63038	3.97049	0.000574488	0.00158141	No	No	Yes	1.87858	3.19669
Q01844	EWSR1	11	sp|Q01844|EWS_HUMAN RNA-binding protein EWS OS=Homo sapiens OX=9606 GN=EWSR1 PE=1 SV=1	21.3552	19.9771	4	3	1.37812	1.50723	0.250356	0.313104	No	No	Yes	2.08134	1.71659
Q02241	KIF23	63	sp|Q02241|KIF23_HUMAN Kinesin-like protein KIF23 OS=Homo sapiens OX=9606 GN=KIF23 PE=1 SV=3	20.7542	23.4309	2	4	-2.67662	-2.92738	0.00531579	0.00951807	Yes	Yes	Yes	1.8553	3.13572
Q02413	DSG1	35	sp|Q02413|DSG1_HUMAN Desmoglein-1 OS=Homo sapiens OX=9606 GN=DSG1 PE=1 SV=2	24.1453	24.5184	4	4	-0.373129	-0.408085	0.362235	0.435371	No	No	No		3.78496
Q02543	RPL18A	20	sp|Q02543|RL18A_HUMAN 60S ribosomal protein L18a OS=Homo sapiens OX=9606 GN=RPL18A PE=1 SV=2	22.9596	21.6207	4	4	1.33888	1.46431	0.189184	0.245664	No	No	Yes	1.9584	2.75252
Q02790	FKBP4	38	sp|Q02790|FKBP4_HUMAN Peptidyl-prolyl cis-trans isomerase FKBP4 OS=Homo sapiens OX=9606 GN=FKBP4 PE=1 SV=3	22.6231	16.1342	1	0	6.48891	7.09682	0.000146476	0.00117234	No	No	Yes	1.86216	2.96496
Q02878	RPL6	32	sp|Q02878|RL6_HUMAN 60S ribosomal protein L6 OS=Homo sapiens OX=9606 GN=RPL6 PE=1 SV=3	23.1334	23.0049	4	4	0.12844	0.140473	0.89389	0.915306	No	No	Yes	2.58529	3.08047
Q02880	TOP2B	34	sp|Q02880|TOP2B_HUMAN DNA topoisomerase 2-beta OS=Homo sapiens OX=9606 GN=TOP2B PE=1 SV=3	16.7168	22.064	0	1	-5.34727	-5.84823	9.98104e-05	0.00117234	No	No	Yes	2.27951	3.69512
Q02978	SLC25A11	18	sp|Q02978|M2OM_HUMAN Mitochondrial 2-oxoglutarate/malate carrier protein OS=Homo sapiens OX=9606 GN=SLC25A11 PE=1 SV=3	21.3705	19.1751	1	1	2.19537	2.40105	0.000897063	0.00200412	No	No	Yes	1.65049	3.40901
Q03252	LMNB2	54	sp|Q03252|LMNB2_HUMAN Lamin-B2 OS=Homo sapiens OX=9606 GN=LMNB2 PE=1 SV=4	19.2728	16.1807	1	0	3.09207	3.38175	0.000272693	0.00127566	No	No	Yes	1.89723	2.62331
Q04637	EIF4G1	67	sp|Q04637|IF4G1_HUMAN Eukaryotic translation initiation factor 4 gamma 1 OS=Homo sapiens OX=9606 GN=EIF4G1 PE=1 SV=4	20.3682	20.7395	2	1	-0.371348	-0.406138	0.129434	0.175494	No	No	Yes	2.31093	3.76659
Q04760	GLO1	9	sp|Q04760|LGUL_HUMAN Lactoylglutathione lyase OS=Homo sapiens OX=9606 GN=GLO1 PE=1 SV=4	22.0053	16.119	1	0	5.88622	6.43767	0.000255202	0.00125827	No	No	Yes	2.43366	2.91717
Q04837	SSBP1	13	sp|Q04837|SSBP_HUMAN Single-stranded DNA-binding protein, mitochondrial OS=Homo sapiens OX=9606 GN=SSBP1 PE=1 SV=1	23.6063	16.151	1	0	7.45528	8.15372	0.000129823	0.00117234	No	No	Yes	2.5036	2.75815
Q05519	SRSF11	9	sp|Q05519|SRS11_HUMAN Serine/arginine-rich splicing factor 11 OS=Homo sapiens OX=9606 GN=SRSF11 PE=1 SV=1	20.5154	20.0555	4	3	0.459842	0.502922	0.6899	0.746885	No	No	Yes	2.59358	2.68784
Q05639	EEF1A2	10	sp|Q05639|EF1A2_HUMAN Elongation factor 1-alpha 2 OS=Homo sapiens OX=9606 GN=EEF1A2 PE=1 SV=1	21.0135	16.1766	1	0	4.8369	5.29004	0.000301182	0.00130279	No	No	Yes	1.68206	3.51364
Q06830	PRDX1	23	sp|Q06830|PRDX1_HUMAN Peroxiredoxin-1 OS=Homo sapiens OX=9606 GN=PRDX1 PE=1 SV=1	24.3821	22.937	4	4	1.44506	1.58044	0.00483669	0.0087238	Yes	Yes	Yes	2.41368	2.96142
Q07020	RPL18	17	sp|Q07020|RL18_HUMAN 60S ribosomal protein L18 OS=Homo sapiens OX=9606 GN=RPL18 PE=1 SV=2	23.7859	23.9434	4	4	-0.157475	-0.172228	0.779897	0.824343	No	No	Yes	2.97848	2.76707
Q07021	C1QBP	14	sp|Q07021|C1QBP_HUMAN Complement component 1 Q subcomponent-binding protein, mitochondrial OS=Homo sapiens OX=9606 GN=C1QBP PE=1 SV=1	19.9918	18.9979	3	1	0.993939	1.08706	0.444036	0.520248	No	No	Yes	2.39252	2.67728
Q07666	KHDRBS1	15	sp|Q07666|KHDR1_HUMAN KH domain-containing, RNA-binding, signal transduction-associated protein 1 OS=Homo sapiens OX=9606 GN=KHDRBS1 PE=1 SV=1	20.3518	20.9848	3	2	-0.632964	-0.692263	0.625966	0.693714	No	No	Yes	2.58952	0.984527
Q07955	SRSF1	29	sp|Q07955|SRSF1_HUMAN Serine/arginine-rich splicing factor 1 OS=Homo sapiens OX=9606 GN=SRSF1 PE=1 SV=2	21.345	22.1677	4	4	-0.822624	-0.899691	0.368462	0.442245	No	No	Yes	2.05749	1.82892
Q08170	SRSF4	17	sp|Q08170|SRSF4_HUMAN Serine/arginine-rich splicing factor 4 OS=Homo sapiens OX=9606 GN=SRSF4 PE=1 SV=2	21.3459	21.6331	4	4	-0.287145	-0.314046	0.474443	0.548679	No	No	Yes	2.25622	0.788875
Q08188	TGM3	26	sp|Q08188|TGM3_HUMAN Protein-glutamine gamma-glutamyltransferase E OS=Homo sapiens OX=9606 GN=TGM3 PE=1 SV=4	21.0431	21.316	4	4	-0.272905	-0.298473	0.562441	0.631863	No	No	No		3.59239
Q08211	DHX9	80	sp|Q08211|DHX9_HUMAN ATP-dependent RNA helicase A OS=Homo sapiens OX=9606 GN=DHX9 PE=1 SV=4	23.5923	22.1661	4	4	1.4262	1.55982	0.0521221	0.0779848	No	No	Yes	2.27772	3.85333
Q08554	DSC1	15	sp|Q08554|DSC1_HUMAN Desmocollin-1 OS=Homo sapiens OX=9606 GN=DSC1 PE=1 SV=2	22.7184	23.3187	4	4	-0.60029	-0.656528	0.138727	0.186296	No	No	No		3.76662
Q08945	SSRP1	35	sp|Q08945|SSRP1_HUMAN FACT complex subunit SSRP1 OS=Homo sapiens OX=9606 GN=SSRP1 PE=1 SV=1	22.24	22.0664	2	1	0.173612	0.189877	0.683453	0.74596	No	No	Yes	2.65172	3.3146
Q08J23	NSUN2	30	sp|Q08J23|NSUN2_HUMAN RNA cytosine C(5)-methyltransferase NSUN2 OS=Homo sapiens OX=9606 GN=NSUN2 PE=1 SV=2	20.2614	16.1245	2	0	4.13688	4.52444	0.00179493	0.00349389	Yes	Yes	Yes	1.82185	3.15108
Q09028	RBBP4	14	sp|Q09028|RBBP4_HUMAN Histone-binding protein RBBP4 OS=Homo sapiens OX=9606 GN=RBBP4 PE=1 SV=3	19.2931	18.6056	3	1	0.687467	0.751872	0.54326	0.612413	No	No	Yes	2.18405	2.68997
Q09666	AHNAK	369	sp|Q09666|AHNK_HUMAN Neuroblast differentiation-associated protein AHNAK OS=Homo sapiens OX=9606 GN=AHNAK PE=1 SV=2	19.3173	20.1567	3	2	-0.83936	-0.917996	0.424522	0.499767	No	No	No		2.61303
Q0ZGT2	NEXN	11	sp|Q0ZGT2|NEXN_HUMAN Nexilin OS=Homo sapiens OX=9606 GN=NEXN PE=1 SV=1	16.7178	18.7135	0	1	-1.99571	-2.18268	0.000281616	0.00127566	No	No	Yes	1.64919	2.69862
Q12849	GRSF1	19	sp|Q12849|GRSF1_HUMAN G-rich sequence factor 1 OS=Homo sapiens OX=9606 GN=GRSF1 PE=1 SV=3	20.5259	16.1376	4	0	4.38828	4.7994	0.000491869	0.00147411	Yes	Yes	Yes	1.9512	2.80889
Q12874	SF3A3	21	sp|Q12874|SF3A3_HUMAN Splicing factor 3A subunit 3 OS=Homo sapiens OX=9606 GN=SF3A3 PE=1 SV=1	21.1068	16.1641	1	0	4.94265	5.4057	0.000282728	0.00127566	No	No	Yes	2.01836	2.76265
Q12904	AIMP1	16	sp|Q12904|AIMP1_HUMAN Aminoacyl tRNA synthase complex-interacting multifunctional protein 1 OS=Homo sapiens OX=9606 GN=AIMP1 PE=1 SV=2	19.5867	16.1114	1	0	3.47534	3.80093	0.000208619	0.00118099	No	No	Yes	1.89728	2.70517
Q12905	ILF2	27	sp|Q12905|ILF2_HUMAN Interleukin enhancer-binding factor 2 OS=Homo sapiens OX=9606 GN=ILF2 PE=1 SV=2	19.2511	20.3316	3	1	-1.08045	-1.18168	0.411693	0.485828	No	No	Yes	2.50376	3.0361
Q12906	ILF3	49	sp|Q12906|ILF3_HUMAN Interleukin enhancer-binding factor 3 OS=Homo sapiens OX=9606 GN=ILF3 PE=1 SV=3	20.0684	20.5946	3	4	-0.526185	-0.57548	0.762276	0.808451	No	No	Yes	2.49734	2.89245
Q12931	TRAP1	42	sp|Q12931|TRAP1_HUMAN Heat shock protein 75 kDa, mitochondrial OS=Homo sapiens OX=9606 GN=TRAP1 PE=1 SV=3	20.4497	16.2217	4	0	4.22793	4.62402	0.0042864	0.00781731	Yes	Yes	Yes	1.97478	3.19731
Q13011	ECH1	20	sp|Q13011|ECH1_HUMAN Delta(3,5)-Delta(2,4)-dienoyl-CoA isomerase, mitochondrial OS=Homo sapiens OX=9606 GN=ECH1 PE=1 SV=2	20.191	16.1378	1	0	4.05321	4.43293	0.00156524	0.00311464	No	No	Yes	1.7687	2.54292
Q13148	TARDBP	15	sp|Q13148|TADBP_HUMAN TAR DNA-binding protein 43 OS=Homo sapiens OX=9606 GN=TARDBP PE=1 SV=1	20.9979	19.4351	4	1	1.56277	1.70918	0.00238729	0.00450423	Yes	Yes	Yes	1.56711	3.23738
Q13151	HNRNPA0	25	sp|Q13151|ROA0_HUMAN Heterogeneous nuclear ribonucleoprotein A0 OS=Homo sapiens OX=9606 GN=HNRNPA0 PE=1 SV=1	20.9428	19.7469	4	4	1.19593	1.30798	0.228153	0.287163	No	No	Yes	2.3289	2.9732
Q13155	AIMP2	12	sp|Q13155|AIMP2_HUMAN Aminoacyl tRNA synthase complex-interacting multifunctional protein 2 OS=Homo sapiens OX=9606 GN=AIMP2 PE=1 SV=2	20.01	16.1588	1	0	3.85118	4.21198	0.000486846	0.00146882	No	No	Yes	1.67709	3.29355
Q13162	PRDX4	18	sp|Q13162|PRDX4_HUMAN Peroxiredoxin-4 OS=Homo sapiens OX=9606 GN=PRDX4 PE=1 SV=1	21.9842	19.8864	1	1	2.0978	2.29433	0.00204773	0.00393918	No	No	Yes	2.04644	3.12113
Q13185	CBX3	10	sp|Q13185|CBX3_HUMAN Chromobox protein homolog 3 OS=Homo sapiens OX=9606 GN=CBX3 PE=1 SV=4	20.8824	19.3251	2	1	1.55723	1.70312	0.031713	0.0500383	No	No	Yes	2.64712	2.92005
Q13200	PSMD2	49	sp|Q13200|PSMD2_HUMAN 26S proteasome non-ATPase regulatory subunit 2 OS=Homo sapiens OX=9606 GN=PSMD2 PE=1 SV=3	21.5447	16.1978	1	0	5.3469	5.84783	0.000435479	0.00143331	No	No	Yes	1.91883	3.79955
Q13242	SRSF9	18	sp|Q13242|SRSF9_HUMAN Serine/arginine-rich splicing factor 9 OS=Homo sapiens OX=9606 GN=SRSF9 PE=1 SV=1	21.4706	16.1607	1	0	5.30985	5.8073	0.000157709	0.00117234	No	No	Yes	1.95295	0.892651
Q13243	SRSF5	11	sp|Q13243|SRSF5_HUMAN Serine/arginine-rich splicing factor 5 OS=Homo sapiens OX=9606 GN=SRSF5 PE=1 SV=1	20.902	16.1765	1	0	4.72542	5.16812	0.000636418	0.00166154	No	No	Yes	2.19697	0.729165
Q13247	SRSF6	9	sp|Q13247|SRSF6_HUMAN Serine/arginine-rich splicing factor 6 OS=Homo sapiens OX=9606 GN=SRSF6 PE=1 SV=2	20.2645	21.3872	4	1	-1.12272	-1.2279	0.108212	0.148981	No	No	Yes	1.93804	0.788875
Q13263	TRIM28	40	sp|Q13263|TIF1B_HUMAN Transcription intermediary factor 1-beta OS=Homo sapiens OX=9606 GN=TRIM28 PE=1 SV=5	21.8756	16.1548	4	0	5.7208	6.25675	0.00115851	0.00242251	Yes	Yes	Yes	1.79522	3.26359
Q13283	G3BP1	21	sp|Q13283|G3BP1_HUMAN Ras GTPase-activating protein-binding protein 1 OS=Homo sapiens OX=9606 GN=G3BP1 PE=1 SV=1	21.7861	19.9265	1	2	1.85961	2.03382	0.00239433	0.00450886	No	No	Yes	2.1851	3.05378
Q13310	PABPC4	19	sp|Q13310|PABP4_HUMAN Polyadenylate-binding protein 4 OS=Homo sapiens OX=9606 GN=PABPC4 PE=1 SV=1	20.8973	16.1685	2	0	4.72877	5.17179	0.00106184	0.00225441	Yes	Yes	Yes	2.29994	2.9166
Q13347	EIF3I	18	sp|Q13347|EIF3I_HUMAN Eukaryotic translation initiation factor 3 subunit I OS=Homo sapiens OX=9606 GN=EIF3I PE=1 SV=1	22.2823	16.201	1	0	6.08137	6.6511	0.000317731	0.00131525	No	No	Yes	2.32065	3.27714
Q13428	TCOF1	53	sp|Q13428|TCOF_HUMAN Treacle protein OS=Homo sapiens OX=9606 GN=TCOF1 PE=1 SV=3	20.437	20.4991	1	1	-0.0620188	-0.067829	0.858658	0.890359	No	No	Yes	2.03372	2.58025
Q13435	SF3B2	43	sp|Q13435|SF3B2_HUMAN Splicing factor 3B subunit 2 OS=Homo sapiens OX=9606 GN=SF3B2 PE=1 SV=2	21.6882	20.19	1	1	1.49818	1.63854	0.00585836	0.0104326	No	No	Yes	2.38451	2.6068
Q13523	PRPF4B	28	sp|Q13523|PRP4B_HUMAN Serine/threonine-protein kinase PRP4 homolog OS=Homo sapiens OX=9606 GN=PRPF4B PE=1 SV=3	19.719	21.2753	4	2	-1.55628	-1.70208	0.0100705	0.0171863	Yes	Yes	Yes	2.29102	2.8126
Q13526	PIN1	6	sp|Q13526|PIN1_HUMAN Peptidyl-prolyl cis-trans isomerase NIMA-interacting 1 OS=Homo sapiens OX=9606 GN=PIN1 PE=1 SV=1	20.3641	16.1693	1	0	4.19474	4.58773	0.000534717	0.00154503	No	No	Yes	1.6011	1.55522
Q13547	HDAC1	13	sp|Q13547|HDAC1_HUMAN Histone deacetylase 1 OS=Homo sapiens OX=9606 GN=HDAC1 PE=1 SV=1	19.8546	16.1795	2	0	3.67519	4.0195	0.000216467	0.00118099	Yes	Yes	Yes	2.13998	2.94796
Q13595	TRA2A	12	sp|Q13595|TRA2A_HUMAN Transformer-2 protein homolog alpha OS=Homo sapiens OX=9606 GN=TRA2A PE=1 SV=1	20.7864	19.9088	2	4	0.877679	0.959904	0.133519	0.180288	No	No	Yes	2.03519	2.98708
Q13601	KRR1	10	sp|Q13601|KRR1_HUMAN KRR1 small subunit processome component homolog OS=Homo sapiens OX=9606 GN=KRR1 PE=1 SV=4	16.7274	19.7028	0	1	-2.97546	-3.25422	0.00203313	0.00391877	No	No	Yes	2.2519	2.2655
Q13813	SPTAN1	161	sp|Q13813|SPTN1_HUMAN Spectrin alpha chain, non-erythrocytic 1 OS=Homo sapiens OX=9606 GN=SPTAN1 PE=1 SV=3	19.1402	19.1295	1	1	0.0106981	0.0117004	0.973743	0.98375	No	No	Yes	1.14065	3.31598
Q13835	PKP1	22	sp|Q13835|PKP1_HUMAN Plakophilin-1 OS=Homo sapiens OX=9606 GN=PKP1 PE=1 SV=2	22.0117	22.0799	4	4	-0.0682089	-0.074599	0.929238	0.943501	No	No	No		2.4849
Q13838	DDX39B	20	sp|Q13838|DX39B_HUMAN Spliceosome RNA helicase DDX39B OS=Homo sapiens OX=9606 GN=DDX39B PE=1 SV=1	23.1589	19.9383	4	3	3.22056	3.52227	0.0469808	0.0710494	No	No	Yes	0.597588	3.5329
Q13867	BLMH	16	sp|Q13867|BLMH_HUMAN Bleomycin hydrolase OS=Homo sapiens OX=9606 GN=BLMH PE=1 SV=1	21.3369	20.0166	2	3	1.32029	1.44398	0.265651	0.3293	No	No	Yes	1.61366	3.46655
Q14008	CKAP5	94	sp|Q14008|CKAP5_HUMAN Cytoskeleton-associated protein 5 OS=Homo sapiens OX=9606 GN=CKAP5 PE=1 SV=3	20.1592	21.9266	1	1	-1.76739	-1.93297	0.00183225	0.00355949	No	No	Yes	2.1254	4.037
Q14019	COTL1	7	sp|Q14019|COTL1_HUMAN Coactosin-like protein OS=Homo sapiens OX=9606 GN=COTL1 PE=1 SV=3	20.1738	16.1265	1	0	4.04736	4.42653	0.00081213	0.00189197	No	No	Yes	1.6743	3.22068
Q14103	HNRNPD	27	sp|Q14103|HNRPD_HUMAN Heterogeneous nuclear ribonucleoprotein D0 OS=Homo sapiens OX=9606 GN=HNRNPD PE=1 SV=1	22.0427	21.0008	4	1	1.04199	1.13961	0.209974	0.267364	No	No	Yes	2.58642	3.02262
Q14126	DSG2	24	sp|Q14126|DSG2_HUMAN Desmoglein-2 OS=Homo sapiens OX=9606 GN=DSG2 PE=1 SV=2	16.7241	22.0727	0	1	-5.34854	-5.84962	0.000115044	0.00117234	No	No	Yes	2.29131	3.83878
Q14152	EIF3A	87	sp|Q14152|EIF3A_HUMAN Eukaryotic translation initiation factor 3 subunit A OS=Homo sapiens OX=9606 GN=EIF3A PE=1 SV=1	21.8755	21.8231	1	1	0.0523404	0.0572439	0.872626	0.901989	No	No	Yes	3.00064	2.87543
Q14204	DYNC1H1	247	sp|Q14204|DYHC1_HUMAN Cytoplasmic dynein 1 heavy chain 1 OS=Homo sapiens OX=9606 GN=DYNC1H1 PE=1 SV=5	19.8977	20.5913	4	1	-0.693591	-0.75857	0.358247	0.431564	No	No	Yes	2.22147	4.26653
Q14315	FLNC	155	sp|Q14315|FLNC_HUMAN Filamin-C OS=Homo sapiens OX=9606 GN=FLNC PE=1 SV=3	19.6028	16.1699	2	0	3.43292	3.75453	0.000665685	0.00171301	Yes	Yes	Yes	0.453983	3.88647
Q14444	CAPRIN1	16	sp|Q14444|CAPR1_HUMAN Caprin-1 OS=Homo sapiens OX=9606 GN=CAPRIN1 PE=1 SV=2	20.0862	16.1633	1	0	3.92282	4.29033	0.000380977	0.00140262	No	No	Yes	1.98083	2.40748
Q14498	RBM39	33	sp|Q14498|RBM39_HUMAN RNA-binding protein 39 OS=Homo sapiens OX=9606 GN=RBM39 PE=1 SV=2	21.9603	22.7076	4	4	-0.747351	-0.817366	0.0921809	0.129287	No	No	Yes	2.38227	3.09049
Q14566	MCM6	35	sp|Q14566|MCM6_HUMAN DNA replication licensing factor MCM6 OS=Homo sapiens OX=9606 GN=MCM6 PE=1 SV=1	21.6619	16.1876	2	0	5.47425	5.9871	0.000303497	0.00130279	Yes	Yes	Yes	1.98056	3.54426
Q14574	DSC3	7	sp|Q14574|DSC3_HUMAN Desmocollin-3 OS=Homo sapiens OX=9606 GN=DSC3 PE=1 SV=3	20.7147	19.4213	2	3	1.29336	1.41452	0.206735	0.263922	No	No	Yes	1.78857	3.844
Q14676	MDC1	46	sp|Q14676|MDC1_HUMAN Mediator of DNA damage checkpoint protein 1 OS=Homo sapiens OX=9606 GN=MDC1 PE=1 SV=3	16.7154	19.7481	0	2	-3.03266	-3.31677	0.000167475	0.00117234	Yes	Yes	Yes	1.69683	3.34806
Q14684	RRP1B	35	sp|Q14684|RRP1B_HUMAN Ribosomal RNA processing protein 1 homolog B OS=Homo sapiens OX=9606 GN=RRP1B PE=1 SV=3	16.7207	22.396	0	1	-5.6753	-6.20699	2.35793e-05	0.00103733	No	No	Yes	2.18722	3.2145
Q14690	PDCD11	66	sp|Q14690|RRP5_HUMAN Protein RRP5 homolog OS=Homo sapiens OX=9606 GN=PDCD11 PE=1 SV=3	16.6792	20.5755	0	1	-3.89629	-4.26132	7.87031e-07	0.000386826	No	No	Yes	2.01174	3.85932
Q14697	GANAB	56	sp|Q14697|GANAB_HUMAN Neutral alpha-glucosidase AB OS=Homo sapiens OX=9606 GN=GANAB PE=1 SV=3	24.292	16.1362	1	0	8.15581	8.91989	0.000101049	0.00117234	No	No	No		3.80403
Q14739	LBR	15	sp|Q14739|LBR_HUMAN Delta(14)-sterol reductase LBR OS=Homo sapiens OX=9606 GN=LBR PE=1 SV=2	21.4038	16.2049	1	0	5.19893	5.68599	0.000428526	0.00143279	No	No	Yes	2.53882	4.0784
Q14839	CHD4	54	sp|Q14839|CHD4_HUMAN Chromodomain-helicase-DNA-binding protein 4 OS=Homo sapiens OX=9606 GN=CHD4 PE=1 SV=2	19.8572	16.1373	1	0	3.71994	4.06844	0.000484675	0.00146882	No	No	Yes	2.50994	3.64595
Q14974	KPNB1	46	sp|Q14974|IMB1_HUMAN Importin subunit beta-1 OS=Homo sapiens OX=9606 GN=KPNB1 PE=1 SV=2	20.6898	20.9484	4	2	-0.258613	-0.282841	0.737303	0.786083	No	No	Yes	2.7717	3.67517
Q14978	NOLC1	40	sp|Q14978|NOLC1_HUMAN Nucleolar and coiled-body phosphoprotein 1 OS=Homo sapiens OX=9606 GN=NOLC1 PE=1 SV=2	21.8723	21.7222	2	2	0.150035	0.164091	0.785583	0.829046	No	No	Yes	2.27931	3.02187
Q14980	NUMA1	124	sp|Q14980|NUMA1_HUMAN Nuclear mitotic apparatus protein 1 OS=Homo sapiens OX=9606 GN=NUMA1 PE=1 SV=2	19.1712	22.3243	1	1	-3.15315	-3.44855	4.7149e-05	0.00117234	No	No	Yes	1.49607	3.25512
Q15029	EFTUD2	56	sp|Q15029|U5S1_HUMAN 116 kDa U5 small nuclear ribonucleoprotein component OS=Homo sapiens OX=9606 GN=EFTUD2 PE=1 SV=1	20.6101	16.1449	1	0	4.46525	4.88357	0.000202436	0.00118099	No	No	Yes	1.66634	3.52026
Q15046	KARS	31	sp|Q15046|SYK_HUMAN Lysine--tRNA ligase OS=Homo sapiens OX=9606 GN=KARS1 PE=1 SV=3	22.1158	16.211	1	0	5.90486	6.45805	0.000329741	0.00132091	No	No	Yes	2.09099	2.81771
Q15050	RRS1	27	sp|Q15050|RRS1_HUMAN Ribosome biogenesis regulatory protein homolog OS=Homo sapiens OX=9606 GN=RRS1 PE=1 SV=2	16.705	21.5136	0	1	-4.80862	-5.25911	9.64472e-09	9.48076e-06	No	No	Yes	1.45669	1.38399
Q15056	EIF4H	14	sp|Q15056|IF4H_HUMAN Eukaryotic translation initiation factor 4H OS=Homo sapiens OX=9606 GN=EIF4H PE=1 SV=5	21.4736	16.1575	1	0	5.31605	5.81408	0.000701424	0.00177249	No	No	Yes	1.24866	1.70689
Q15058	KIF14	71	sp|Q15058|KIF14_HUMAN Kinesin-like protein KIF14 OS=Homo sapiens OX=9606 GN=KIF14 PE=1 SV=1	18.8055	20.384	2	3	-1.57854	-1.72643	0.3562	0.429625	No	No	Yes	1.88558	3.61021
Q15084	PDIA6	25	sp|Q15084|PDIA6_HUMAN Protein disulfide-isomerase A6 OS=Homo sapiens OX=9606 GN=PDIA6 PE=1 SV=1	23.7846	16.1792	1	0	7.60539	8.3179	0.000253468	0.00125827	No	No	Yes	2.53704	3.32819
Q15154	PCM1	109	sp|Q15154|PCM1_HUMAN Pericentriolar material 1 protein OS=Homo sapiens OX=9606 GN=PCM1 PE=1 SV=5	23.8916	25.0117	4	4	-1.12012	-1.22506	0.0385317	0.0592748	No	No	Yes	2.02743	2.77782
Q15181	PPA1	21	sp|Q15181|IPYR_HUMAN Inorganic pyrophosphatase OS=Homo sapiens OX=9606 GN=PPA1 PE=1 SV=2	22.3225	16.2045	2	0	6.11792	6.69107	0.000967153	0.00209804	Yes	Yes	Yes	2.0308	3.01429
Q15185	PTGES3	8	sp|Q15185|TEBP_HUMAN Prostaglandin E synthase 3 OS=Homo sapiens OX=9606 GN=PTGES3 PE=1 SV=1	20.1868	16.1662	4	0	4.02061	4.39728	0.000159925	0.00117234	Yes	Yes	Yes	2.52959	1.29798
Q15233	NONO	54	sp|Q15233|NONO_HUMAN Non-POU domain-containing octamer-binding protein OS=Homo sapiens OX=9606 GN=NONO PE=1 SV=4	21.3049	20.6107	4	4	0.694216	0.759254	0.376684	0.449916	No	No	Yes	2.71257	2.71466
Q15287	RNPS1	10	sp|Q15287|RNPS1_HUMAN RNA-binding protein with serine-rich domain 1 OS=Homo sapiens OX=9606 GN=RNPS1 PE=1 SV=1	19.8766	19.4259	2	1	0.450768	0.492998	0.16349	0.216675	No	No	Yes	1.63654	1.99948
Q15365	PCBP1	15	sp|Q15365|PCBP1_HUMAN Poly(rC)-binding protein 1 OS=Homo sapiens OX=9606 GN=PCBP1 PE=1 SV=2	22.1241	20.2371	4	3	1.88702	2.06381	0.198075	0.254853	No	No	Yes	2.24588	3.10222
Q15366	PCBP2	12	sp|Q15366|PCBP2_HUMAN Poly(rC)-binding protein 2 OS=Homo sapiens OX=9606 GN=PCBP2 PE=1 SV=1	22.1652	21.6121	4	2	0.553134	0.604954	0.134549	0.181429	No	No	Yes	2.43591	3.19661
Q15369	TCEB1	6	sp|Q15369|ELOC_HUMAN Elongin-C OS=Homo sapiens OX=9606 GN=ELOC PE=1 SV=1	20.3039	16.1586	1	0	4.14536	4.53372	0.000584606	0.00160074	No	No	No		2.02424
Q15370	TCEB2	8	sp|Q15370|ELOB_HUMAN Elongin-B OS=Homo sapiens OX=9606 GN=ELOB PE=1 SV=1	20.0473	16.1942	1	0	3.85303	4.214	0.000800787	0.00189103	No	No	No		2.64603
Q15393	SF3B3	45	sp|Q15393|SF3B3_HUMAN Splicing factor 3B subunit 3 OS=Homo sapiens OX=9606 GN=SF3B3 PE=1 SV=4	21.1276	20.7263	1	1	0.401319	0.438916	0.286529	0.353841	No	No	Yes	2.053	3.92271
Q15424	SAFB	25	sp|Q15424|SAFB1_HUMAN Scaffold attachment factor B1 OS=Homo sapiens OX=9606 GN=SAFB PE=1 SV=4	21.337	22.1988	1	1	-0.861823	-0.942563	0.0304379	0.048415	No	No	Yes	1.79574	2.64756
Q15427	SF3B4	9	sp|Q15427|SF3B4_HUMAN Splicing factor 3B subunit 4 OS=Homo sapiens OX=9606 GN=SF3B4 PE=1 SV=1	19.6017	16.1498	1	0	3.45187	3.77526	0.00161571	0.00318925	No	No	Yes	1.50675	2.97037
Q15428	SF3A2	16	sp|Q15428|SF3A2_HUMAN Splicing factor 3A subunit 2 OS=Homo sapiens OX=9606 GN=SF3A2 PE=1 SV=2	20.0077	16.1551	1	0	3.85255	4.21348	0.000593357	0.00161124	No	No	Yes	1.06725	2.27497
Q15459	SF3A1	44	sp|Q15459|SF3A1_HUMAN Splicing factor 3A subunit 1 OS=Homo sapiens OX=9606 GN=SF3A1 PE=1 SV=1	22.236	16.2362	1	0	5.99982	6.56191	0.000442541	0.00143331	No	No	Yes	2.1098	2.88577
Q15517	CDSN	7	sp|Q15517|CDSN_HUMAN Corneodesmosin OS=Homo sapiens OX=9606 GN=CDSN PE=1 SV=3	20.9975	21.5248	4	4	-0.52724	-0.576634	0.15147	0.202029	No	No	No		3.01976
Q15637	SF1	20	sp|Q15637|SF01_HUMAN Splicing factor 1 OS=Homo sapiens OX=9606 GN=SF1 PE=1 SV=4	22.0659	16.1895	1	0	5.87635	6.42688	0.000474481	0.00146451	No	No	Yes	2.1337	2.86194
Q15691	MAPRE1	18	sp|Q15691|MARE1_HUMAN Microtubule-associated protein RP/EB family member 1 OS=Homo sapiens OX=9606 GN=MAPRE1 PE=1 SV=3	20.4203	16.1661	1	0	4.25419	4.65274	0.000409062	0.00140801	No	No	Yes	1.63159	2.24267
Q15717	ELAVL1	23	sp|Q15717|ELAV1_HUMAN ELAV-like protein 1 OS=Homo sapiens OX=9606 GN=ELAVL1 PE=1 SV=2	20.3331	20.3059	3	1	0.0272406	0.0297926	0.983869	0.986881	No	No	Yes	1.87646	3.06346
Q15907	RAB11B	3	sp|Q15907|RB11B_HUMAN Ras-related protein Rab-11B OS=Homo sapiens OX=9606 GN=RAB11B PE=1 SV=4	20.8797	16.2134	1	0	4.66637	5.10354	0.000473924	0.00146451	No	No	Yes	1.55847	3.08424
Q16181	SEPT7	25	sp|Q16181|SEPT7_HUMAN Septin-7 OS=Homo sapiens OX=9606 GN=SEPTIN7 PE=1 SV=2	20.0693	16.1697	1	0	3.89954	4.26486	0.00104333	0.0022199	No	No	No		3.17251
Q16222	UAP1	10	sp|Q16222|UAP1_HUMAN UDP-N-acetylhexosamine pyrophosphorylase OS=Homo sapiens OX=9606 GN=UAP1 PE=1 SV=3	19.3224	16.1193	1	0	3.20312	3.5032	0.000835276	0.00191809	No	No	Yes	1.46781	3.62327
Q16531	DDB1	42	sp|Q16531|DDB1_HUMAN DNA damage-binding protein 1 OS=Homo sapiens OX=9606 GN=DDB1 PE=1 SV=1	20.1072	16.1355	1	0	3.97163	4.34371	0.000446393	0.00143553	No	No	Yes	1.98685	3.91339
Q16576	RBBP7	13	sp|Q16576|RBBP7_HUMAN Histone-binding protein RBBP7 OS=Homo sapiens OX=9606 GN=RBBP7 PE=1 SV=1	20.7603	16.1409	1	0	4.61943	5.0522	0.000228879	0.00120873	No	No	Yes	2.33022	2.71818
Q16610	ECM1	10	sp|Q16610|ECM1_HUMAN Extracellular matrix protein 1 OS=Homo sapiens OX=9606 GN=ECM1 PE=1 SV=2	19.2352	19.453	4	4	-0.217824	-0.238231	0.499644	0.572436	No	No	No		3.1603
Q16629	SRSF7	14	sp|Q16629|SRSF7_HUMAN Serine/arginine-rich splicing factor 7 OS=Homo sapiens OX=9606 GN=SRSF7 PE=1 SV=1	21.5777	22.8889	4	4	-1.31113	-1.43397	0.0717418	0.103557	No	No	Yes	2.41532	1.72452
Q16630	CPSF6	11	sp|Q16630|CPSF6_HUMAN Cleavage and polyadenylation specificity factor subunit 6 OS=Homo sapiens OX=9606 GN=CPSF6 PE=1 SV=2	20.007	20.0492	1	1	-0.042168	-0.0461184	0.908805	0.927679	No	No	Yes	1.96573	3.33729
Q16643	DBN1	38	sp|Q16643|DREB_HUMAN Drebrin OS=Homo sapiens OX=9606 GN=DBN1 PE=1 SV=4	20.1177	16.1131	1	0	4.00451	4.37968	0.000411087	0.00140801	No	No	Yes	1.73711	2.91519
Q16658	FSCN1	36	sp|Q16658|FSCN1_HUMAN Fascin OS=Homo sapiens OX=9606 GN=FSCN1 PE=1 SV=3	21.0107	16.1848	2	0	4.82589	5.278	0.000925535	0.00203081	Yes	Yes	Yes	1.77432	2.94141
Q16706	MAN2A1	2	sp|Q16706|MA2A1_HUMAN Alpha-mannosidase 2 OS=Homo sapiens OX=9606 GN=MAN2A1 PE=1 SV=2	16.7143	16.664	0	1	0.0502739	0.0549837	0.740663	0.78881	No	No	Yes	1.4037	3.73097
Q16762	TST	8	sp|Q16762|THTR_HUMAN Thiosulfate sulfurtransferase OS=Homo sapiens OX=9606 GN=TST PE=1 SV=4	21.0602	16.1508	4	0	4.90936	5.3693	0.000159151	0.00117234	Yes	Yes	Yes	1.37334	2.71383
Q16795	NDUFA9	18	sp|Q16795|NDUA9_HUMAN NADH dehydrogenase [ubiquinone] 1 alpha subcomplex subunit 9, mitochondrial OS=Homo sapiens OX=9606 GN=NDUFA9 PE=1 SV=2	18.4567	16.1666	1	0	2.29013	2.50468	0.00221011	0.00420219	No	No	Yes	1.59366	3.27889
Q16836	HADH	16	sp|Q16836|HCDH_HUMAN Hydroxyacyl-coenzyme A dehydrogenase, mitochondrial OS=Homo sapiens OX=9606 GN=HADH PE=1 SV=3	20.9006	16.191	1	0	4.70956	5.15078	0.000467825	0.00145991	No	No	Yes	1.70513	2.67152
Q16891	IMMT	54	sp|Q16891|MIC60_HUMAN MICOS complex subunit MIC60 OS=Homo sapiens OX=9606 GN=IMMT PE=1 SV=1	21.1442	16.1598	1	0	4.98442	5.45139	3.60036e-05	0.00117234	No	No	Yes	2.01293	3.16499
Q2KHM9	KIAA0753	10	sp|Q2KHM9|MOONR_HUMAN Protein moonraker OS=Homo sapiens OX=9606 GN=KIAA0753 PE=1 SV=3	16.6941	21.0012	0	1	-4.30704	-4.71054	7.34361e-05	0.00117234	No	No	Yes	1.11677	2.85087
Q2M1P5	KIF7	24	sp|Q2M1P5|KIF7_HUMAN Kinesin-like protein KIF7 OS=Homo sapiens OX=9606 GN=KIF7 PE=1 SV=2	19.0117	19.5333	1	3	-0.521595	-0.57046	0.675525	0.741945	No	No	Yes	1.3421	3.29133
Q49A88	CCDC14	32	sp|Q49A88|CCD14_HUMAN Coiled-coil domain-containing protein 14 OS=Homo sapiens OX=9606 GN=CCDC14 PE=1 SV=3	16.7258	19.5097	0	1	-2.78391	-3.04472	5.49156e-05	0.00117234	No	No	Yes	1.61861	2.34819
Q4AC94	C2CD3	13	sp|Q4AC94|C2CD3_HUMAN C2 domain-containing protein 3 OS=Homo sapiens OX=9606 GN=C2CD3 PE=1 SV=4	16.7932	19.4392	0	2	-2.64598	-2.89387	0.00137932	0.00279413	Yes	Yes	Yes	0.804849	3.72351
Q4VCS5	AMOT	26	sp|Q4VCS5|AMOT_HUMAN Angiomotin OS=Homo sapiens OX=9606 GN=AMOT PE=1 SV=1	19.715	20.7317	1	4	-1.01678	-1.11204	0.404428	0.478979	No	No	Yes	2.39281	3.1585
Q53GQ0	HSD17B12	10	sp|Q53GQ0|DHB12_HUMAN Very-long-chain 3-oxoacyl-CoA reductase OS=Homo sapiens OX=9606 GN=HSD17B12 PE=1 SV=2	20.0488	16.1192	1	0	3.92957	4.29771	0.000478213	0.00146451	No	No	Yes	2.1682	3.38056
Q53H12	AGK	11	sp|Q53H12|AGK_HUMAN Acylglycerol kinase, mitochondrial OS=Homo sapiens OX=9606 GN=AGK PE=1 SV=2	21.2442	20.6123	1	1	0.631821	0.691013	0.0656853	0.0955158	No	No	Yes	1.50372	3.13995
Q58FF8	HSP90AB2P	2	sp|Q58FF8|H90B2_HUMAN Putative heat shock protein HSP 90-beta 2 OS=Homo sapiens OX=9606 GN=HSP90AB2P PE=1 SV=2	21.5731	16.1763	2	0	5.39679	5.90239	0.000562569	0.00156809	Yes	Yes	Yes	-0.120181	3.20471
Q59GN2	RPL39P5	3	sp|Q59GN2|R39L5_HUMAN Putative 60S ribosomal protein L39-like 5 OS=Homo sapiens OX=9606 GN=RPL39P5 PE=5 SV=2;sp|P62891|RL39_HUMAN 60S ribosomal protein L39 OS=Homo sapiens OX=9606 GN=RPL39 PE=1 SV=2	21.4038	21.8282	3	3	-0.424375	-0.464132	0.855621	0.888209	No	No	No
Q5BJF6	ODF2	44	sp|Q5BJF6|ODFP2_HUMAN Outer dense fiber protein 2 OS=Homo sapiens OX=9606 GN=ODF2 PE=1 SV=1	16.7652	21.4317	0	4	-4.66654	-5.10372	0.00550353	0.00981846	Yes	Yes	Yes	1.36471	2.93728
Q5BKZ1	ZNF326	19	sp|Q5BKZ1|ZN326_HUMAN DBIRD complex subunit ZNF326 OS=Homo sapiens OX=9606 GN=ZNF326 PE=1 SV=2	19.6263	16.1771	1	0	3.44923	3.77237	0.000804119	0.00189103	No	No	Yes	2.09877	2.25568
Q5JRX3	PITRM1	30	sp|Q5JRX3|PREP_HUMAN Presequence protease, mitochondrial OS=Homo sapiens OX=9606 GN=PITRM1 PE=1 SV=3	19.0084	16.1495	3	0	2.85889	3.12672	0.0213531	0.0351592	Yes	Yes	Yes	1.52432	3.40112
Q5JTW2	CEP78	8	sp|Q5JTW2|CEP78_HUMAN Centrosomal protein of 78 kDa OS=Homo sapiens OX=9606 GN=CEP78 PE=1 SV=1	16.7083	18.6012	0	1	-1.89288	-2.07021	0.000159246	0.00117234	No	No	Yes	1.8173	2.68876
Q5M775	SPECC1	3	sp|Q5M775|CYTSB_HUMAN Cytospin-B OS=Homo sapiens OX=9606 GN=SPECC1 PE=1 SV=1	16.6885	18.7655	0	1	-2.077	-2.27158	2.10244e-05	0.00103733	No	No	Yes	1.70235	3.00721
Q5SSJ5	HP1BP3	31	sp|Q5SSJ5|HP1B3_HUMAN Heterochromatin protein 1-binding protein 3 OS=Homo sapiens OX=9606 GN=HP1BP3 PE=1 SV=1	20.2967	22.4765	1	1	-2.17979	-2.38401	0.000376715	0.0013986	No	No	Yes	2.01324	2.81078
Q5SW79	CEP170	14	sp|Q5SW79|CE170_HUMAN Centrosomal protein of 170 kDa OS=Homo sapiens OX=9606 GN=CEP170 PE=1 SV=1	16.7234	19.6945	0	3	-2.97115	-3.2495	0.0620939	0.0908307	No	No	Yes	1.88271	3.24232
Q5T749	KPRP	31	sp|Q5T749|KPRP_HUMAN Keratinocyte proline-rich protein OS=Homo sapiens OX=9606 GN=KPRP PE=1 SV=1	24.0378	24.0925	4	4	-0.0547016	-0.0598263	0.932056	0.944547	No	No	No		0.996949
Q5T750	XP32	8	sp|Q5T750|XP32_HUMAN Skin-specific protein 32 OS=Homo sapiens OX=9606 GN=XP32 PE=1 SV=1	22.8479	21.6503	4	3	1.1976	1.3098	0.503045	0.574324	No	No	No		0.735599
Q5TZA2	CROCC	3	sp|Q5TZA2|CROCC_HUMAN Rootletin OS=Homo sapiens OX=9606 GN=CROCC PE=1 SV=1	20.3544	16.1452	1	0	4.20924	4.60358	0.000438661	0.00143331	No	No	Yes	0.720854	2.84367
Q5VT06	CEP350	62	sp|Q5VT06|CE350_HUMAN Centrosome-associated protein 350 OS=Homo sapiens OX=9606 GN=CEP350 PE=1 SV=1	20.2261	21.614	1	4	-1.38793	-1.51796	0.175657	0.229922	No	No	Yes	2.24461	3.25352
Q5VTL8	PRPF38B	16	sp|Q5VTL8|PR38B_HUMAN Pre-mRNA-splicing factor 38B OS=Homo sapiens OX=9606 GN=PRPF38B PE=1 SV=1	16.7046	21.2325	0	2	-4.52787	-4.95206	0.000187058	0.00117234	Yes	Yes	Yes	2.41812	2.93713
Q5VVQ6	YOD1	1	sp|Q5VVQ6|OTU1_HUMAN Ubiquitin thioesterase OTU1 OS=Homo sapiens OX=9606 GN=YOD1 PE=1 SV=1	16.7707	17.9043	0	1	-1.13353	-1.23973	0.00108048	0.00228411	No	No	Yes	1.23752	3.21725
Q66GS9	CEP135	38	sp|Q66GS9|CP135_HUMAN Centrosomal protein of 135 kDa OS=Homo sapiens OX=9606 GN=CEP135 PE=1 SV=2	16.6874	21.9003	0	2	-5.2129	-5.70127	1.45307e-06	0.000424783	Yes	Yes	Yes	1.84251	2.29319
Q66PJ3	ARL6IP4	11	sp|Q66PJ3|AR6P4_HUMAN ADP-ribosylation factor-like protein 6-interacting protein 4 OS=Homo sapiens OX=9606 GN=ARL6IP4 PE=1 SV=2	19.1784	18.6522	1	1	0.526128	0.575418	0.107599	0.148554	No	No	Yes	1.06472	0.911158
Q6FI13	HIST2H2AA3	2	sp|Q6FI13|H2A2A_HUMAN Histone H2A type 2-A OS=Homo sapiens OX=9606 GN=H2AC18 PE=1 SV=3;sp|Q16777|H2A2C_HUMAN Histone H2A type 2-C OS=Homo sapiens OX=9606 GN=H2AC20 PE=1 SV=4	25.7567	27.9959	4	4	-2.23924	-2.44902	0.0295807	0.047281	Yes	Yes	No		2.54291
Q6NVY1	HIBCH	14	sp|Q6NVY1|HIBCH_HUMAN 3-hydroxyisobutyryl-CoA hydrolase, mitochondrial OS=Homo sapiens OX=9606 GN=HIBCH PE=1 SV=2	19.4946	16.1581	1	0	3.3365	3.64908	0.000672111	0.00172053	No	No	Yes	1.49398	3.0922
Q6P2E9	EDC4	30	sp|Q6P2E9|EDC4_HUMAN Enhancer of mRNA-decapping protein 4 OS=Homo sapiens OX=9606 GN=EDC4 PE=1 SV=1	19.3676	16.1394	1	0	3.2282	3.53063	0.000450592	0.00143553	No	No	No		3.53014
Q6P2Q9	PRPF8	110	sp|Q6P2Q9|PRP8_HUMAN Pre-mRNA-processing-splicing factor 8 OS=Homo sapiens OX=9606 GN=PRPF8 PE=1 SV=2	20.5755	21.3324	1	1	-0.756888	-0.827797	0.0763608	0.109581	No	No	Yes	2.01783	4.00468
Q6PI48	DARS2	23	sp|Q6PI48|SYDM_HUMAN Aspartate--tRNA ligase, mitochondrial OS=Homo sapiens OX=9606 GN=DARS2 PE=1 SV=1	20.7324	16.1762	4	0	4.55617	4.98302	0.0013472	0.00274181	Yes	Yes	Yes	1.70392	3.4726
Q6UWP8	SBSN	6	sp|Q6UWP8|SBSN_HUMAN Suprabasin OS=Homo sapiens OX=9606 GN=SBSN PE=1 SV=2	18.9395	19.0195	3	3	-0.080003	-0.0874981	0.936168	0.947737	No	No	No		2.77092
Q6YN16	HSDL2	15	sp|Q6YN16|HSDL2_HUMAN Hydroxysteroid dehydrogenase-like protein 2 OS=Homo sapiens OX=9606 GN=HSDL2 PE=1 SV=1	20.4689	16.1855	1	0	4.28338	4.68467	0.000352803	0.00134944	No	No	Yes	1.81776	3.03087
Q6ZU80	CEP128	45	sp|Q6ZU80|CE128_HUMAN Centrosomal protein of 128 kDa OS=Homo sapiens OX=9606 GN=CEP128 PE=1 SV=2	16.7415	21.7268	0	4	-4.98528	-5.45233	0.00753861	0.0130927	Yes	Yes	Yes	1.38958	2.58564
Q6ZVX7	NCCRP1	7	sp|Q6ZVX7|FBX50_HUMAN F-box only protein 50 OS=Homo sapiens OX=9606 GN=NCCRP1 PE=1 SV=1	20.8393	20.5575	4	3	0.281818	0.30822	0.827666	0.86186	No	No	No		2.61604
Q71DI3	HIST2H3A	2	sp|Q71DI3|H32_HUMAN Histone H3.2 OS=Homo sapiens OX=9606 GN=H3C15 PE=1 SV=3	25.2831	27.0964	4	4	-1.81332	-1.98319	0.0300511	0.0478772	Yes	Yes	No		2.10755
Q71U36	TUBA1A	0	sp|Q71U36|TBA1A_HUMAN Tubulin alpha-1A chain OS=Homo sapiens OX=9606 GN=TUBA1A PE=1 SV=1	19.7265	16.1934	4	0	3.53306	3.86405	0.00016438	0.00117234	Yes	Yes	Yes	1.85528	2.81161
Q71UI9	H2AFV	7	sp|Q71UI9|H2AV_HUMAN Histone H2A.V OS=Homo sapiens OX=9606 GN=H2AZ2 PE=1 SV=3;sp|P0C0S5|H2AZ_HUMAN Histone H2A.Z OS=Homo sapiens OX=9606 GN=H2AZ1 PE=1 SV=2	20.6524	22.937	3	4	-2.28464	-2.49868	0.167566	0.221394	No	No	Yes	2.30546	2.5412
Q76M96	CCDC80	4	sp|Q76M96|CCD80_HUMAN Coiled-coil domain-containing protein 80 OS=Homo sapiens OX=9606 GN=CCDC80 PE=1 SV=1	16.6941	25.3362	0	1	-8.64207	-9.4517	2.16948e-05	0.00103733	No	No	Yes	1.23563	3.54709
Q76N32	CEP68	14	sp|Q76N32|CEP68_HUMAN Centrosomal protein of 68 kDa OS=Homo sapiens OX=9606 GN=CEP68 PE=1 SV=2	16.7328	20.3692	0	3	-3.63636	-3.97704	0.060633	0.088826	No	No	Yes	1.18548	2.91884
Q7KZF4	SND1	63	sp|Q7KZF4|SND1_HUMAN Staphylococcal nuclease domain-containing protein 1 OS=Homo sapiens OX=9606 GN=SND1 PE=1 SV=1	20.0436	21.1461	4	1	-1.10249	-1.20577	0.17817	0.232282	No	No	Yes	1.97255	3.59736
Q7L014	DDX46	50	sp|Q7L014|DDX46_HUMAN Probable ATP-dependent RNA helicase DDX46 OS=Homo sapiens OX=9606 GN=DDX46 PE=1 SV=2	21.8956	21.6719	4	4	0.223779	0.244744	0.717712	0.77105	No	No	Yes	2.33308	3.56388
Q7L0Y3	TRMT10C	24	sp|Q7L0Y3|TM10C_HUMAN tRNA methyltransferase 10 homolog C OS=Homo sapiens OX=9606 GN=TRMT10C PE=1 SV=2	19.9045	16.1898	2	0	3.71468	4.06268	0.000189578	0.00117234	Yes	Yes	Yes	1.82923	3.09462
Q7L2E3	DHX30	52	sp|Q7L2E3|DHX30_HUMAN ATP-dependent RNA helicase DHX30 OS=Homo sapiens OX=9606 GN=DHX30 PE=1 SV=1	19.6144	20.2783	3	1	-0.663875	-0.726069	0.501028	0.57277	No	No	Yes	1.8298	3.69041
Q7Z4V5	HDGFRP2	12	sp|Q7Z4V5|HDGR2_HUMAN Hepatoma-derived growth factor-related protein 2 OS=Homo sapiens OX=9606 GN=HDGFL2 PE=1 SV=1	20.141	16.1619	1	0	3.97908	4.35186	0.000741956	0.00183077	No	No	No		3.02546
Q7Z4W1	DCXR	14	sp|Q7Z4W1|DCXR_HUMAN L-xylulose reductase OS=Homo sapiens OX=9606 GN=DCXR PE=1 SV=2	19.7708	16.2127	1	0	3.55808	3.89141	0.000760726	0.00183682	No	No	Yes	1.70994	3.03684
Q7Z7A1	CNTRL	7	sp|Q7Z7A1|CNTRL_HUMAN Centriolin OS=Homo sapiens OX=9606 GN=CNTRL PE=1 SV=2	16.7383	19.6134	0	1	-2.87504	-3.14439	0.000508861	0.00150213	No	No	Yes	1.62829	3.15797
Q7Z7K6	CENPV	5	sp|Q7Z7K6|CENPV_HUMAN Centromere protein V OS=Homo sapiens OX=9606 GN=CENPV PE=1 SV=1	16.7387	20.3091	0	1	-3.57043	-3.90493	0.000478237	0.00146451	No	No	Yes	1.76397	1.67136
Q86T90	KIAA1328	6	sp|Q86T90|K1328_HUMAN Protein hinderin OS=Homo sapiens OX=9606 GN=KIAA1328 PE=1 SV=2	16.7374	20.4301	0	1	-3.6927	-4.03865	0.000256007	0.00125827	No	No	Yes	0.896347	2.31361
Q86U42	PABPN1	16	sp|Q86U42|PABP2_HUMAN Polyadenylate-binding protein 2 OS=Homo sapiens OX=9606 GN=PABPN1 PE=1 SV=3	19.8266	19.7051	1	1	0.121494	0.132876	0.57488	0.645099	No	No	Yes	1.51058	2.07686
Q86UE4	MTDH	20	sp|Q86UE4|LYRIC_HUMAN Protein LYRIC OS=Homo sapiens OX=9606 GN=MTDH PE=1 SV=2	16.6812	19.3635	0	1	-2.68225	-2.93354	0.000485347	0.00146882	No	No	Yes	2.884	3.26102
Q86V81	ALYREF	13	sp|Q86V81|THOC4_HUMAN THO complex subunit 4 OS=Homo sapiens OX=9606 GN=ALYREF PE=1 SV=3	22.2716	20.1087	2	3	2.16284	2.36547	0.192108	0.248477	No	No	Yes	1.87493	1.33041
Q86VP6	CAND1	48	sp|Q86VP6|CAND1_HUMAN Cullin-associated NEDD8-dissociated protein 1 OS=Homo sapiens OX=9606 GN=CAND1 PE=1 SV=2	20.1496	20.3446	1	1	-0.194991	-0.213259	0.585209	0.653286	No	No	Yes	2.02313	3.7703
Q86XR8	CEP57	7	sp|Q86XR8|CEP57_HUMAN Centrosomal protein of 57 kDa OS=Homo sapiens OX=9606 GN=CEP57 PE=1 SV=2	16.6761	17.0347	0	1	-0.358626	-0.392224	0.00442296	0.00803655	No	No	Yes	2.07558	2.71978
Q86YT6	MIB1	44	sp|Q86YT6|MIB1_HUMAN E3 ubiquitin-protein ligase MIB1 OS=Homo sapiens OX=9606 GN=MIB1 PE=1 SV=1	19.3533	21.754	3	4	-2.40073	-2.62564	0.0755537	0.108581	No	No	Yes	2.24403	3.1711
Q8IUE6	HIST2H2AB	3	sp|Q8IUE6|H2A2B_HUMAN Histone H2A type 2-B OS=Homo sapiens OX=9606 GN=H2AC21 PE=1 SV=3	22.3292	22.939	1	1	-0.609802	-0.666931	0.204687	0.262673	No	No	Yes	0.536687	2.7593
Q8IW35	CEP97	7	sp|Q8IW35|CEP97_HUMAN Centrosomal protein of 97 kDa OS=Homo sapiens OX=9606 GN=CEP97 PE=1 SV=1	16.7043	18.5173	0	2	-1.813	-1.98285	0.000600791	0.00162026	Yes	Yes	Yes	1.63809	3.21088
Q8IWX8	CHERP	24	sp|Q8IWX8|CHERP_HUMAN Calcium homeostasis endoplasmic reticulum protein OS=Homo sapiens OX=9606 GN=CHERP PE=1 SV=3	20.2385	19.1261	1	1	1.11243	1.21665	0.00975052	0.0166691	No	No	Yes	1.8024	3.03944
Q8IX12	CCAR1	23	sp|Q8IX12|CCAR1_HUMAN Cell division cycle and apoptosis regulator protein 1 OS=Homo sapiens OX=9606 GN=CCAR1 PE=1 SV=2	19.8303	16.2305	1	0	3.59984	3.93709	0.000438368	0.00143331	No	No	Yes	2.58735	3.36336
Q8IXT5	RBM12B	12	sp|Q8IXT5|RB12B_HUMAN RNA-binding protein 12B OS=Homo sapiens OX=9606 GN=RBM12B PE=1 SV=2	19.194	16.1297	1	0	3.0643	3.35138	0.00166117	0.00325935	No	No	Yes	1.63927	3.3635
Q8IYB3	SRRM1	27	sp|Q8IYB3|SRRM1_HUMAN Serine/arginine repetitive matrix protein 1 OS=Homo sapiens OX=9606 GN=SRRM1 PE=1 SV=2	20.2543	20.7358	1	2	-0.481539	-0.526652	0.253967	0.316779	No	No	Yes	2.52807	2.14067
Q8IZL8	PELP1	18	sp|Q8IZL8|PELP1_HUMAN Proline-, glutamic acid- and leucine-rich protein 1 OS=Homo sapiens OX=9606 GN=PELP1 PE=1 SV=2	19.4289	16.1317	1	0	3.29721	3.60611	0.0012992	0.00266622	No	No	Yes	1.84033	3.50656
Q8N0Z3	SPICE1	7	sp|Q8N0Z3|SPICE_HUMAN Spindle and centriole-associated protein 1 OS=Homo sapiens OX=9606 GN=SPICE1 PE=1 SV=1	16.7246	19.3173	0	2	-2.59269	-2.83558	0.000270331	0.00127566	Yes	Yes	Yes	1.14024	2.53773
Q8N163	CCAR2	30	sp|Q8N163|CCAR2_HUMAN Cell cycle and apoptosis regulator protein 2 OS=Homo sapiens OX=9606 GN=CCAR2 PE=1 SV=2	19.2268	16.1382	1	0	3.08855	3.3779	0.00213633	0.00407769	No	No	Yes	1.07692	3.45996
Q8N1F7	NUP93	39	sp|Q8N1F7|NUP93_HUMAN Nuclear pore complex protein Nup93 OS=Homo sapiens OX=9606 GN=NUP93 PE=1 SV=2	19.5789	16.1902	1	0	3.38867	3.70613	0.000391413	0.00140801	No	No	Yes	1.93533	3.77814
Q8N1G4	LRRC47	15	sp|Q8N1G4|LRC47_HUMAN Leucine-rich repeat-containing protein 47 OS=Homo sapiens OX=9606 GN=LRRC47 PE=1 SV=1	20.4691	16.1676	1	0	4.30146	4.70444	0.000402985	0.00140801	No	No	Yes	1.77946	2.72893
Q8N257	HIST3H2BB	2	sp|Q8N257|H2B3B_HUMAN Histone H2B type 3-B OS=Homo sapiens OX=9606 GN=H2BU1 PE=1 SV=3	16.7056	19.5422	0	1	-2.83654	-3.10228	1.39057e-05	0.00103733	No	No	Yes	-0.737572	2.59468
Q8N4C6	NIN	69	sp|Q8N4C6|NIN_HUMAN Ninein OS=Homo sapiens OX=9606 GN=NIN PE=1 SV=4	16.6878	21.8945	0	4	-5.20666	-5.69444	0.0297017	0.0473974	Yes	Yes	Yes	1.90842	3.33371
Q8N5F7	NKAP	6	sp|Q8N5F7|NKAP_HUMAN NF-kappa-B-activating protein OS=Homo sapiens OX=9606 GN=NKAP PE=1 SV=1	20.2321	19.8013	2	2	0.430779	0.471136	0.17241	0.226378	No	No	Yes	2.12693	1.3681
Q8N960	CEP120	17	sp|Q8N960|CE120_HUMAN Centrosomal protein of 120 kDa OS=Homo sapiens OX=9606 GN=CEP120 PE=1 SV=2	16.7119	19.7388	0	2	-3.02687	-3.31044	0.000181949	0.00117234	Yes	Yes	Yes	1.44488	3.58521
Q8NBS9	TXNDC5	22	sp|Q8NBS9|TXND5_HUMAN Thioredoxin domain-containing protein 5 OS=Homo sapiens OX=9606 GN=TXNDC5 PE=1 SV=2	21.9155	16.1713	1	0	5.74421	6.28235	0.000476095	0.00146451	No	No	No		3.3238
Q8NC51	SERBP1	33	sp|Q8NC51|PAIRB_HUMAN Plasminogen activator inhibitor 1 RNA-binding protein OS=Homo sapiens OX=9606 GN=SERBP1 PE=1 SV=2	22.329	22.7637	4	4	-0.434709	-0.475434	0.684605	0.74596	No	No	Yes	3.19945	1.78633
Q8NE71	ABCF1	32	sp|Q8NE71|ABCF1_HUMAN ATP-binding cassette sub-family F member 1 OS=Homo sapiens OX=9606 GN=ABCF1 PE=1 SV=2	20.7669	21.0042	2	1	-0.237257	-0.259484	0.527374	0.598625	No	No	Yes	2.19559	3.42257
Q8NFP7	NUDT10	1	sp|Q8NFP7|NUD10_HUMAN Diphosphoinositol polyphosphate phosphohydrolase 3-alpha OS=Homo sapiens OX=9606 GN=NUDT10 PE=1 SV=1;sp|Q96G61|NUD11_HUMAN Diphosphoinositol polyphosphate phosphohydrolase 3-beta OS=Homo sapiens OX=9606 GN=NUDT11 PE=1 SV=1;sp|Q9NZJ9|N	16.7027	17.9021	0	1	-1.19945	-1.31182	0.00701454	0.0122257	No	No	Yes	1.40513	3.01968
Q8NI27	THOC2	13	sp|Q8NI27|THOC2_HUMAN THO complex subunit 2 OS=Homo sapiens OX=9606 GN=THOC2 PE=1 SV=2	16.729	18.3551	0	1	-1.62609	-1.77843	0.005877	0.0104439	No	No	Yes	2.656	3.88688
Q8NI35	INADL	4	sp|Q8NI35|INADL_HUMAN InaD-like protein OS=Homo sapiens OX=9606 GN=PATJ PE=1 SV=3	16.6928	17.8264	0	1	-1.13361	-1.23981	0.00269079	0.00503818	No	No	No		3.69641
Q8TB36	GDAP1	3	sp|Q8TB36|GDAP1_HUMAN Ganglioside-induced differentiation-associated protein 1 OS=Homo sapiens OX=9606 GN=GDAP1 PE=1 SV=3	18.7406	16.1341	1	0	2.60651	2.8507	0.000984085	0.00212139	No	No	Yes	1.247	3.37052
Q8TCU4	ALMS1	23	sp|Q8TCU4|ALMS1_HUMAN Alstrom syndrome protein 1 OS=Homo sapiens OX=9606 GN=ALMS1 PE=1 SV=4	16.7482	21.6017	0	1	-4.85347	-5.30816	0.000344394	0.00133271	No	No	Yes	1.39342	3.39029
Q8TCU6	PREX1	1	sp|Q8TCU6|PREX1_HUMAN Phosphatidylinositol 3,4,5-trisphosphate-dependent Rac exchanger 1 protein OS=Homo sapiens OX=9606 GN=PREX1 PE=1 SV=3	20.3342	16.1673	1	0	4.16693	4.5573	0.000438518	0.00143331	No	No	Yes	0.752572	3.72115
Q8TDN6	BRIX1	16	sp|Q8TDN6|BRX1_HUMAN Ribosome biogenesis protein BRX1 homolog OS=Homo sapiens OX=9606 GN=BRIX1 PE=1 SV=2	16.708	21.1304	0	1	-4.42234	-4.83664	4.95952e-05	0.00117234	No	No	Yes	1.90368	3.26618
Q8TEP8	CEP192	80	sp|Q8TEP8|CE192_HUMAN Centrosomal protein of 192 kDa OS=Homo sapiens OX=9606 GN=CEP192 PE=1 SV=3	19.4703	20.7798	1	3	-1.30955	-1.43223	0.453495	0.530066	No	No	Yes	1.25915	3.73408
Q8TER5	ARHGEF40	5	sp|Q8TER5|ARH40_HUMAN Rho guanine nucleotide exchange factor 40 OS=Homo sapiens OX=9606 GN=ARHGEF40 PE=1 SV=3	16.7117	22.4737	0	1	-5.76199	-6.3018	1.25127e-05	0.001025	No	No	Yes	0.768347	3.45472
Q8WUM4	PDCD6IP	54	sp|Q8WUM4|PDC6I_HUMAN Programmed cell death 6-interacting protein OS=Homo sapiens OX=9606 GN=PDCD6IP PE=1 SV=1	21.8182	20.6549	1	1	1.16331	1.27229	0.00945225	0.016244	No	No	Yes	1.96071	3.30391
Q8WUQ7	CACTIN	3	sp|Q8WUQ7|CATIN_HUMAN Cactin OS=Homo sapiens OX=9606 GN=CACTIN PE=1 SV=3	16.7024	18.6289	0	1	-1.92658	-2.10707	0.000638925	0.00166154	No	No	Yes	0.75392	2.95446
Q8WVV4	POF1B	17	sp|Q8WVV4|POF1B_HUMAN Protein POF1B OS=Homo sapiens OX=9606 GN=POF1B PE=1 SV=3	19.7642	20.9659	3	4	-1.20165	-1.31422	0.335932	0.408185	No	No	Yes	-0.726627	2.35183
Q8WWK9	CKAP2	11	sp|Q8WWK9|CKAP2_HUMAN Cytoskeleton-associated protein 2 OS=Homo sapiens OX=9606 GN=CKAP2 PE=1 SV=1	21.101	16.1891	1	0	4.91189	5.37206	0.000211867	0.00118099	No	No	Yes	2.0756	3.11695
Q8WX93	PALLD	23	sp|Q8WX93|PALLD_HUMAN Palladin OS=Homo sapiens OX=9606 GN=PALLD PE=1 SV=3	16.7374	22.5502	0	1	-5.81282	-6.35739	1.79606e-05	0.00103733	No	No	Yes	1.76845	3.15007
Q8WXF1	PSPC1	22	sp|Q8WXF1|PSPC1_HUMAN Paraspeckle component 1 OS=Homo sapiens OX=9606 GN=PSPC1 PE=1 SV=1	20.9911	16.1677	1	0	4.82336	5.27524	0.000691983	0.00176223	No	No	Yes	1.70218	2.78136
Q92499	DDX1	49	sp|Q92499|DDX1_HUMAN ATP-dependent RNA helicase DDX1 OS=Homo sapiens OX=9606 GN=DDX1 PE=1 SV=2	19.3588	19.5948	3	2	-0.236022	-0.258134	0.818424	0.855863	No	No	Yes	2.38251	3.34588
Q92522	H1FX	15	sp|Q92522|H1X_HUMAN Histone H1.10 OS=Homo sapiens OX=9606 GN=H1-10 PE=1 SV=1	16.6737	20.2518	0	3	-3.57819	-3.91341	0.0580843	0.0858599	No	No	Yes	2.03651	1.40722
Q92598	HSPH1	45	sp|Q92598|HS105_HUMAN Heat shock protein 105 kDa OS=Homo sapiens OX=9606 GN=HSPH1 PE=1 SV=1	20.2351	16.1915	4	0	4.04355	4.42237	0.00667681	0.0116577	Yes	Yes	Yes	2.18661	3.17672
Q92616	GCN1L1	120	sp|Q92616|GCN1_HUMAN eIF-2-alpha kinase activator GCN1 OS=Homo sapiens OX=9606 GN=GCN1 PE=1 SV=6	19.5426	16.1695	1	0	3.37313	3.68915	0.00132061	0.00269887	No	No	No		4.09673
Q92688	ANP32B	9	sp|Q92688|AN32B_HUMAN Acidic leucine-rich nuclear phosphoprotein 32 family member B OS=Homo sapiens OX=9606 GN=ANP32B PE=1 SV=1	21.4271	16.1616	1	0	5.26547	5.75876	0.000385837	0.00140473	No	No	Yes	2.67387	2.84339
Q92841	DDX17	34	sp|Q92841|DDX17_HUMAN Probable ATP-dependent RNA helicase DDX17 OS=Homo sapiens OX=9606 GN=DDX17 PE=1 SV=2	22.7167	22.5114	4	4	0.205334	0.224571	0.715289	0.770131	No	No	Yes	2.55736	3.25757
Q92858	ATOH1	1	sp|Q92858|ATOH1_HUMAN Protein atonal homolog 1 OS=Homo sapiens OX=9606 GN=ATOH1 PE=2 SV=1	16.7248	19.141	0	1	-2.41619	-2.64255	0.000948544	0.00207204	No	No	No		1.68833
Q92900	UPF1	29	sp|Q92900|RENT1_HUMAN Regulator of nonsense transcripts 1 OS=Homo sapiens OX=9606 GN=UPF1 PE=1 SV=2	20.1396	16.1893	1	0	3.95024	4.32032	0.000301267	0.00130279	No	No	Yes	1.66487	3.67733
Q92945	KHSRP	39	sp|Q92945|FUBP2_HUMAN Far upstream element-binding protein 2 OS=Homo sapiens OX=9606 GN=KHSRP PE=1 SV=4	21.7049	19.017	4	1	2.68789	2.9397	0.0232174	0.0381014	Yes	Yes	Yes	2.61366	2.88109
Q92973	TNPO1	24	sp|Q92973|TNPO1_HUMAN Transportin-1 OS=Homo sapiens OX=9606 GN=TNPO1 PE=1 SV=2	21.6709	19.129	1	1	2.54193	2.78007	0.00170616	0.00334094	No	No	Yes	2.19341	3.72553
Q92979	EMG1	9	sp|Q92979|NEP1_HUMAN Ribosomal RNA small subunit methyltransferase NEP1 OS=Homo sapiens OX=9606 GN=EMG1 PE=1 SV=4	16.7434	19.308	0	1	-2.56456	-2.80482	0.000462239	0.00144707	No	No	Yes	1.28914	3.19885
Q93077	HIST1H2AC	2	sp|Q93077|H2A1C_HUMAN Histone H2A type 1-C OS=Homo sapiens OX=9606 GN=H2AC6 PE=1 SV=3;sp|Q7L7L0|H2A3_HUMAN Histone H2A type 3 OS=Homo sapiens OX=9606 GN=H2AW PE=1 SV=3;sp|P04908|H2A1B_HUMAN Histone H2A type 1-B/E OS=Homo sapiens OX=9606 GN=H2AC4 PE=1 SV=2	22.0331	22.294	1	1	-0.260991	-0.285442	0.493792	0.568381	No	No	Yes	0.704605	2.75171
Q93079	HIST1H2BH	0	sp|Q93079|H2B1H_HUMAN Histone H2B type 1-H OS=Homo sapiens OX=9606 GN=H2BC9 PE=1 SV=3;sp|Q5QNW6|H2B2F_HUMAN Histone H2B type 2-F OS=Homo sapiens OX=9606 GN=H2BC18 PE=1 SV=3	25.9414	27.7619	4	4	-1.82051	-1.99107	0.0560822	0.0831506	No	No	No		2.60275
Q96A72	MAGOHB	1	sp|Q96A72|MGN2_HUMAN Protein mago nashi homolog 2 OS=Homo sapiens OX=9606 GN=MAGOHB PE=1 SV=1	20.4669	16.1582	1	0	4.30875	4.71241	0.000396861	0.00140801	No	No	Yes	1.57504	2.93386
Q96AE4	FUBP1	26	sp|Q96AE4|FUBP1_HUMAN Far upstream element-binding protein 1 OS=Homo sapiens OX=9606 GN=FUBP1 PE=1 SV=3	23.0104	16.1236	1	0	6.88671	7.53189	0.000169074	0.00117234	No	No	Yes	2.27828	3.10451
Q96AG4	LRRC59	24	sp|Q96AG4|LRC59_HUMAN Leucine-rich repeat-containing protein 59 OS=Homo sapiens OX=9606 GN=LRRC59 PE=1 SV=1	22.75	16.2087	1	0	6.54126	7.15407	0.000275066	0.00127566	No	No	Yes	1.94866	3.09185
Q96C36	PYCR2	20	sp|Q96C36|P5CR2_HUMAN Pyrroline-5-carboxylate reductase 2 OS=Homo sapiens OX=9606 GN=PYCR2 PE=1 SV=1	20.0614	16.1537	1	0	3.90763	4.27371	0.000619944	0.00163819	No	No	Yes	2.16458	3.03373
Q96CN7	ISOC1	12	sp|Q96CN7|ISOC1_HUMAN Isochorismatase domain-containing protein 1 OS=Homo sapiens OX=9606 GN=ISOC1 PE=1 SV=3	16.7373	19.52	0	2	-2.78271	-3.04341	0.000614777	0.00163331	Yes	Yes	Yes	1.65653	3.45634
Q96CS3	FAF2	19	sp|Q96CS3|FAF2_HUMAN FAS-associated factor 2 OS=Homo sapiens OX=9606 GN=FAF2 PE=1 SV=2	20.1439	16.1024	1	0	4.04149	4.42011	0.000238856	0.0012293	No	No	Yes	2.03753	3.56084
Q96CT7	CCDC124	13	sp|Q96CT7|CC124_HUMAN Coiled-coil domain-containing protein 124 OS=Homo sapiens OX=9606 GN=CCDC124 PE=1 SV=1	21.2778	20.773	2	1	0.504833	0.552128	0.19563	0.252699	No	No	Yes	1.34338	2.33903
Q96DA0	ZG16B	6	sp|Q96DA0|ZG16B_HUMAN Zymogen granule protein 16 homolog B OS=Homo sapiens OX=9606 GN=ZG16B PE=1 SV=3	16.7026	20.5841	0	2	-3.88154	-4.24519	3.9395e-05	0.00117234	Yes	Yes	No		3.40863
Q96DN5	TBC1D31	23	sp|Q96DN5|TBC31_HUMAN TBC1 domain family member 31 OS=Homo sapiens OX=9606 GN=TBC1D31 PE=1 SV=2	16.7119	21.3239	0	2	-4.61203	-5.0441	4.9735e-05	0.00117234	Yes	Yes	Yes	1.49295	3.67302
Q96EP5	DAZAP1	11	sp|Q96EP5|DAZP1_HUMAN DAZ-associated protein 1 OS=Homo sapiens OX=9606 GN=DAZAP1 PE=1 SV=1	20.3576	16.1685	1	0	4.18912	4.58158	0.000924745	0.00203081	No	No	Yes	2.02303	3.15334
Q96FQ6	S100A16	6	sp|Q96FQ6|S10AG_HUMAN Protein S100-A16 OS=Homo sapiens OX=9606 GN=S100A16 PE=1 SV=1	20.762	21.0014	2	2	-0.23937	-0.261796	0.48108	0.555701	No	No	Yes	-0.383907	2.8305
Q96FW1	OTUB1	9	sp|Q96FW1|OTUB1_HUMAN Ubiquitin thioesterase OTUB1 OS=Homo sapiens OX=9606 GN=OTUB1 PE=1 SV=2	20.4623	16.1222	1	0	4.34011	4.74672	0.000217375	0.00118099	No	No	Yes	1.41356	3.07364
Q96GE4	CEP95	10	sp|Q96GE4|CEP95_HUMAN Centrosomal protein of 95 kDa OS=Homo sapiens OX=9606 GN=CEP95 PE=1 SV=1	16.7366	16.9308	0	1	-0.194196	-0.21239	0.115815	0.158781	No	No	Yes	1.59911	3.2104
Q96GQ7	DDX27	25	sp|Q96GQ7|DDX27_HUMAN Probable ATP-dependent RNA helicase DDX27 OS=Homo sapiens OX=9606 GN=DDX27 PE=1 SV=2	16.7417	20.5434	0	1	-3.80175	-4.15792	2.42924e-06	0.000477588	No	No	Yes	2.06109	3.20006
Q96HS1	PGAM5	22	sp|Q96HS1|PGAM5_HUMAN Serine/threonine-protein phosphatase PGAM5, mitochondrial OS=Homo sapiens OX=9606 GN=PGAM5 PE=1 SV=2	20.4232	19.9526	1	2	0.470598	0.514686	0.130833	0.177148	No	No	Yes	1.58825	3.09054
Q96I24	FUBP3	21	sp|Q96I24|FUBP3_HUMAN Far upstream element-binding protein 3 OS=Homo sapiens OX=9606 GN=FUBP3 PE=1 SV=2	20.7023	16.1326	2	0	4.56973	4.99785	0.00159708	0.0031588	Yes	Yes	Yes	1.65417	3.01954
Q96M89	CCDC138	5	sp|Q96M89|CC138_HUMAN Coiled-coil domain-containing protein 138 OS=Homo sapiens OX=9606 GN=CCDC138 PE=1 SV=1	16.6842	20.1	0	1	-3.41584	-3.73585	6.73045e-05	0.00117234	No	No	Yes	1.39656	3.15642
Q96MT8	CEP63	24	sp|Q96MT8|CEP63_HUMAN Centrosomal protein of 63 kDa OS=Homo sapiens OX=9606 GN=CEP63 PE=1 SV=1	16.7095	20.8685	0	2	-4.15898	-4.54862	0.000141515	0.00117234	Yes	Yes	Yes	1.54454	1.42012
Q96P63	SERPINB12	20	sp|Q96P63|SPB12_HUMAN Serpin B12 OS=Homo sapiens OX=9606 GN=SERPINB12 PE=1 SV=1	22.634	23.1164	4	4	-0.482361	-0.527551	0.241118	0.301936	No	No	No		3.31678
Q96P70	IPO9	21	sp|Q96P70|IPO9_HUMAN Importin-9 OS=Homo sapiens OX=9606 GN=IPO9 PE=1 SV=3	16.6985	17.8489	0	1	-1.15035	-1.25812	0.0028272	0.00528354	No	No	Yes	2.3143	3.82293
Q96PK6	RBM14	35	sp|Q96PK6|RBM14_HUMAN RNA-binding protein 14 OS=Homo sapiens OX=9606 GN=RBM14 PE=1 SV=2	22.1883	20.4029	4	3	1.78533	1.95259	0.213401	0.271375	No	No	Yes	1.10001	2.11767
Q96QA5	GSDMA	8	sp|Q96QA5|GSDMA_HUMAN Gasdermin-A OS=Homo sapiens OX=9606 GN=GSDMA PE=1 SV=4	19.7716	18.7979	1	1	0.973625	1.06484	0.0361013	0.0560625	No	No	No		3.15589
Q96RP9	GFM1	19	sp|Q96RP9|EFGM_HUMAN Elongation factor G, mitochondrial OS=Homo sapiens OX=9606 GN=GFM1 PE=1 SV=2	19.7945	16.1843	2	0	3.61024	3.94847	0.0010934	0.00230647	Yes	Yes	Yes	1.84793	3.32478
Q96SN8	CDK5RAP2	83	sp|Q96SN8|CK5P2_HUMAN CDK5 regulatory subunit-associated protein 2 OS=Homo sapiens OX=9606 GN=CDK5RAP2 PE=1 SV=5	19.6194	22.6518	4	4	-3.03241	-3.3165	0.0699906	0.101476	No	No	Yes	1.75244	3.25473
Q96T37	RBM15	17	sp|Q96T37|RBM15_HUMAN RNA-binding protein 15 OS=Homo sapiens OX=9606 GN=RBM15 PE=1 SV=2	20.4171	20.2426	1	1	0.174462	0.190806	0.653352	0.721623	No	No	Yes	1.55055	3.13637
Q99460	PSMD1	32	sp|Q99460|PSMD1_HUMAN 26S proteasome non-ATPase regulatory subunit 1 OS=Homo sapiens OX=9606 GN=PSMD1 PE=1 SV=2	21.4396	16.2189	1	0	5.22071	5.70981	0.000602087	0.00162026	No	No	Yes	2.3874	3.77735
Q99497	PARK7	22	sp|Q99497|PARK7_HUMAN Parkinson disease protein 7 OS=Homo sapiens OX=9606 GN=PARK7 PE=1 SV=2	23.4164	16.2305	1	0	7.18586	7.85906	7.79181e-05	0.00117234	No	No	Yes	2.26646	2.85273
Q99536	VAT1	18	sp|Q99536|VAT1_HUMAN Synaptic vesicle membrane protein VAT-1 homolog OS=Homo sapiens OX=9606 GN=VAT1 PE=1 SV=2	20.6826	16.1517	1	0	4.53092	4.95539	0.000273164	0.00127566	No	No	Yes	1.83355	3.38201
Q99613	EIF3C	33	sp|Q99613|EIF3C_HUMAN Eukaryotic translation initiation factor 3 subunit C OS=Homo sapiens OX=9606 GN=EIF3C PE=1 SV=1;sp|B5ME19|EIFCL_HUMAN Eukaryotic translation initiation factor 3 subunit C-like protein OS=Homo sapiens OX=9606 GN=EIF3CL PE=1 SV=1	20.5881	19.8068	1	1	0.781316	0.854513	0.0546701	0.0814253	No	No	Yes	-0.24827	3.39092
Q99615	DNAJC7	31	sp|Q99615|DNJC7_HUMAN DnaJ homolog subfamily C member 7 OS=Homo sapiens OX=9606 GN=DNAJC7 PE=1 SV=2	16.7418	18.7174	0	1	-1.9756	-2.16068	0.000279814	0.00127566	No	No	No		2.93732
Q99623	PHB2	27	sp|Q99623|PHB2_HUMAN Prohibitin-2 OS=Homo sapiens OX=9606 GN=PHB2 PE=1 SV=2	23.2761	16.1813	1	0	7.09481	7.75949	0.000108067	0.00117234	No	No	Yes	2.31097	2.57513
Q99714	HSD17B10	21	sp|Q99714|HCD2_HUMAN 3-hydroxyacyl-CoA dehydrogenase type-2 OS=Homo sapiens OX=9606 GN=HSD17B10 PE=1 SV=3	22.995	20.7423	4	2	2.25273	2.46378	0.0260857	0.0422442	Yes	Yes	Yes	1.65917	3.08434
Q99729	HNRNPAB	20	sp|Q99729|ROAA_HUMAN Heterogeneous nuclear ribonucleoprotein A/B OS=Homo sapiens OX=9606 GN=HNRNPAB PE=1 SV=2	24.4159	16.1648	1	0	8.25108	9.02408	0.000217337	0.00118099	No	No	Yes	2.38205	3.0628
Q99733	NAP1L4	14	sp|Q99733|NP1L4_HUMAN Nucleosome assembly protein 1-like 4 OS=Homo sapiens OX=9606 GN=NAP1L4 PE=1 SV=1	20.0149	16.1137	1	0	3.90123	4.26671	0.000547716	0.00155755	No	No	No		3.14453
Q99798	ACO2	44	sp|Q99798|ACON_HUMAN Aconitate hydratase, mitochondrial OS=Homo sapiens OX=9606 GN=ACO2 PE=1 SV=2	21.3467	16.1896	4	0	5.15712	5.64026	0.00201261	0.00388683	Yes	Yes	Yes	1.6668	3.2322
Q99832	CCT7	47	sp|Q99832|TCPH_HUMAN T-complex protein 1 subunit eta OS=Homo sapiens OX=9606 GN=CCT7 PE=1 SV=2	22.9499	16.208	1	0	6.74189	7.3735	0.000138582	0.00117234	No	No	Yes	2.17064	3.36082
Q99848	EBNA1BP2	23	sp|Q99848|EBP2_HUMAN Probable rRNA-processing protein EBP2 OS=Homo sapiens OX=9606 GN=EBNA1BP2 PE=1 SV=2	16.7151	18.6397	0	3	-1.92453	-2.10482	0.132253	0.178824	No	No	No		2.4735
Q99873	PRMT1	16	sp|Q99873|ANM1_HUMAN Protein arginine N-methyltransferase 1 OS=Homo sapiens OX=9606 GN=PRMT1 PE=1 SV=3	19.0127	16.1621	1	0	2.85062	3.11768	0.00133377	0.00272011	No	No	Yes	1.86109	3.33868
Q99986	VRK1	16	sp|Q99986|VRK1_HUMAN Serine/threonine-protein kinase VRK1 OS=Homo sapiens OX=9606 GN=VRK1 PE=1 SV=1	18.9091	19.3247	1	1	-0.415656	-0.454597	0.264372	0.328544	No	No	Yes	2.05046	2.63144
Q99988	GDF15	4	sp|Q99988|GDF15_HUMAN Growth/differentiation factor 15 OS=Homo sapiens OX=9606 GN=GDF15 PE=1 SV=3	18.2344	16.2098	1	0	2.02466	2.21434	0.00240979	0.0045293	No	No	Yes	0.803876	2.92965
Q99996	AKAP9	122	sp|Q99996|AKAP9_HUMAN A-kinase anchor protein 9 OS=Homo sapiens OX=9606 GN=AKAP9 PE=1 SV=4	16.764	20.9376	0	3	-4.17362	-4.56462	0.0816664	0.116177	No	No	Yes	2.30447	3.58736
Q9BQ39	DDX50	16	sp|Q9BQ39|DDX50_HUMAN ATP-dependent RNA helicase DDX50 OS=Homo sapiens OX=9606 GN=DDX50 PE=1 SV=1	16.6944	20.3663	0	1	-3.67194	-4.01595	5.53556e-05	0.00117234	No	No	Yes	2.14924	3.0309
Q9BQG0	MYBBP1A	59	sp|Q9BQG0|MBB1A_HUMAN Myb-binding protein 1A OS=Homo sapiens OX=9606 GN=MYBBP1A PE=1 SV=2	20.0927	22.4944	1	1	-2.40169	-2.6267	0.000219151	0.00118099	No	No	Yes	1.48515	3.80263
Q9BQS8	FYCO1	1	sp|Q9BQS8|FYCO1_HUMAN FYVE and coiled-coil domain-containing protein 1 OS=Homo sapiens OX=9606 GN=FYCO1 PE=1 SV=3	18.3736	16.1519	1	0	2.22173	2.42987	0.00266286	0.00499539	No	No	Yes	1.04415	3.37137
Q9BR77	CCDC77	11	sp|Q9BR77|CCD77_HUMAN Coiled-coil domain-containing protein 77 OS=Homo sapiens OX=9606 GN=CCDC77 PE=1 SV=1	16.7116	19.7278	0	1	-3.01617	-3.29874	0.000137273	0.00117234	No	No	Yes	1.3723	2.68388
Q9BRA2	TXNDC17	4	sp|Q9BRA2|TXD17_HUMAN Thioredoxin domain-containing protein 17 OS=Homo sapiens OX=9606 GN=TXNDC17 PE=1 SV=1	21.194	16.1212	1	0	5.07275	5.54799	0.000362574	0.00137081	No	No	Yes	1.81616	1.89639
Q9BTT0	ANP32E	9	sp|Q9BTT0|AN32E_HUMAN Acidic leucine-rich nuclear phosphoprotein 32 family member E OS=Homo sapiens OX=9606 GN=ANP32E PE=1 SV=1	19.5704	16.1666	3	0	3.40377	3.72265	0.0269925	0.0435692	Yes	Yes	Yes	2.42169	1.57519
Q9BU76	MMTAG2	8	sp|Q9BU76|MMTA2_HUMAN Multiple myeloma tumor-associated protein 2 OS=Homo sapiens OX=9606 GN=MMTAG2 PE=1 SV=1	16.7373	18.3145	0	3	-1.57721	-1.72497	0.0449474	0.0681841	No	No	No		2.2348
Q9BUF5	TUBB6	17	sp|Q9BUF5|TBB6_HUMAN Tubulin beta-6 chain OS=Homo sapiens OX=9606 GN=TUBB6 PE=1 SV=1	21.0574	16.1306	1	0	4.92681	5.38838	0.000337876	0.00132675	No	No	Yes	1.62654	2.78708
Q9BV73	CEP250	77	sp|Q9BV73|CP250_HUMAN Centrosome-associated protein CEP250 OS=Homo sapiens OX=9606 GN=CEP250 PE=1 SV=2	16.7502	21.5846	0	3	-4.83441	-5.28732	0.0576029	0.0852766	No	No	Yes	1.42117	3.24477
Q9BVA1	TUBB2B	2	sp|Q9BVA1|TBB2B_HUMAN Tubulin beta-2B chain OS=Homo sapiens OX=9606 GN=TUBB2B PE=1 SV=1	20.6139	16.2137	3	0	4.40021	4.81244	0.0378949	0.0584594	No	No	Yes	2.18904	2.82904
Q9BVK6	TMED9	8	sp|Q9BVK6|TMED9_HUMAN Transmembrane emp24 domain-containing protein 9 OS=Homo sapiens OX=9606 GN=TMED9 PE=1 SV=2	19.9936	16.1393	1	0	3.85437	4.21547	0.000422983	0.00142418	No	No	Yes	2.34701	3.47033
Q9BVP2	GNL3	26	sp|Q9BVP2|GNL3_HUMAN Guanine nucleotide-binding protein-like 3 OS=Homo sapiens OX=9606 GN=GNL3 PE=1 SV=2	16.7454	19.6152	0	1	-2.86979	-3.13864	0.000388462	0.00140801	No	No	Yes	2.1923	2.99015
Q9BWD1	ACAT2	15	sp|Q9BWD1|THIC_HUMAN Acetyl-CoA acetyltransferase, cytosolic OS=Homo sapiens OX=9606 GN=ACAT2 PE=1 SV=2	19.8988	16.1509	1	0	3.74792	4.09905	0.00021064	0.00118099	No	No	Yes	1.71931	3.38004
Q9BWF3	RBM4	6	sp|Q9BWF3|RBM4_HUMAN RNA-binding protein 4 OS=Homo sapiens OX=9606 GN=RBM4 PE=1 SV=1	19.9034	16.1678	2	0	3.73567	4.08565	0.000760322	0.00183682	Yes	Yes	Yes	1.01783	1.95703
Q9BXP5	SRRT	40	sp|Q9BXP5|SRRT_HUMAN Serrate RNA effector molecule homolog OS=Homo sapiens OX=9606 GN=SRRT PE=1 SV=1	19.1993	16.1358	2	0	3.0635	3.3505	0.00103169	0.00220949	Yes	Yes	Yes	1.95798	3.09779
Q9BYJ1	ALOXE3	6	sp|Q9BYJ1|LOXE3_HUMAN Hydroperoxide isomerase ALOXE3 OS=Homo sapiens OX=9606 GN=ALOXE3 PE=1 SV=1	16.6685	19.8909	0	1	-3.22237	-3.52425	0.000318613	0.00131525	No	No	Yes	0.0400039	3.51444
Q9BZE4	GTPBP4	31	sp|Q9BZE4|NOG1_HUMAN Nucleolar GTP-binding protein 1 OS=Homo sapiens OX=9606 GN=GTPBP4 PE=1 SV=3	16.709	21.1913	0	1	-4.48225	-4.90217	2.23876e-05	0.00103733	No	No	Yes	2.28868	2.95502
Q9BZI7	UPF3B	9	sp|Q9BZI7|REN3B_HUMAN Regulator of nonsense transcripts 3B OS=Homo sapiens OX=9606 GN=UPF3B PE=1 SV=1	16.7011	19.4715	0	1	-2.77035	-3.02989	0.000487116	0.00146882	No	No	Yes	2.51186	1.97955
Q9BZZ5	API5	19	sp|Q9BZZ5|API5_HUMAN Apoptosis inhibitor 5 OS=Homo sapiens OX=9606 GN=API5 PE=1 SV=3	16.7361	19.6851	0	1	-2.949	-3.22527	7.79458e-05	0.00117234	No	No	Yes	1.76673	3.188
Q9C0D2	CEP295	6	sp|Q9C0D2|CE295_HUMAN Centrosomal protein of 295 kDa OS=Homo sapiens OX=9606 GN=CEP295 PE=1 SV=4	16.7332	20.0287	0	1	-3.29547	-3.60421	0.000112724	0.00117234	No	No	Yes	1.70537	2.8992
Q9GZT3	SLIRP	9	sp|Q9GZT3|SLIRP_HUMAN SRA stem-loop-interacting RNA-binding protein, mitochondrial OS=Homo sapiens OX=9606 GN=SLIRP PE=1 SV=1	19.6575	16.1688	1	0	3.48872	3.81556	0.000862126	0.00195721	No	No	Yes	2.25044	0.769377
Q9H0A0	NAT10	44	sp|Q9H0A0|NAT10_HUMAN RNA cytidine acetyltransferase OS=Homo sapiens OX=9606 GN=NAT10 PE=1 SV=2	16.7278	20.481	0	1	-3.75326	-4.10488	5.39577e-05	0.00117234	No	No	No		3.79561
Q9H0D6	XRN2	36	sp|Q9H0D6|XRN2_HUMAN 5-3 exoribonuclease 2 OS=Homo sapiens OX=9606 GN=XRN2 PE=1 SV=1	21.1971	19.9071	1	1	1.28999	1.41084	0.0126365	0.0213065	No	No	Yes	2.32006	3.55554
Q9H0H5	RACGAP1	31	sp|Q9H0H5|RGAP1_HUMAN Rac GTPase-activating protein 1 OS=Homo sapiens OX=9606 GN=RACGAP1 PE=1 SV=1	16.7326	20.6144	0	2	-3.88172	-4.24538	0.000423296	0.00142418	Yes	Yes	Yes	1.28131	2.86475
Q9H0S4	DDX47	16	sp|Q9H0S4|DDX47_HUMAN Probable ATP-dependent RNA helicase DDX47 OS=Homo sapiens OX=9606 GN=DDX47 PE=1 SV=1	16.7269	19.2218	0	1	-2.4949	-2.72863	0.000371863	0.0013952	No	No	Yes	0.157297	3.36604
Q9H0U4	RAB1B	9	sp|Q9H0U4|RAB1B_HUMAN Ras-related protein Rab-1B OS=Homo sapiens OX=9606 GN=RAB1B PE=1 SV=1	20.9616	16.1613	1	0	4.80032	5.25003	0.000501779	0.00149469	No	No	Yes	1.20357	2.93886
Q9H307	PNN	24	sp|Q9H307|PININ_HUMAN Pinin OS=Homo sapiens OX=9606 GN=PNN PE=1 SV=5	19.6916	21.3382	1	2	-1.64658	-1.80084	0.00597709	0.0105609	Yes	Yes	Yes	2.65141	2.109
Q9H3N1	TMX1	11	sp|Q9H3N1|TMX1_HUMAN Thioredoxin-related transmembrane protein 1 OS=Homo sapiens OX=9606 GN=TMX1 PE=1 SV=1	20.1744	16.1495	1	0	4.02483	4.4019	0.00120284	0.00248925	No	No	Yes	2.08396	3.45476
Q9H4A4	RNPEP	18	sp|Q9H4A4|AMPB_HUMAN Aminopeptidase B OS=Homo sapiens OX=9606 GN=RNPEP PE=1 SV=2	19.9344	16.1212	1	0	3.8133	4.17054	0.000762097	0.00183682	No	No	Yes	1.59843	3.47506
Q9H6F5	CCDC86	9	sp|Q9H6F5|CCD86_HUMAN Coiled-coil domain-containing protein 86 OS=Homo sapiens OX=9606 GN=CCDC86 PE=1 SV=1	16.645	20.603	0	1	-3.95792	-4.32872	9.06721e-05	0.00117234	No	No	Yes	1.62416	2.47936
Q9H7B2	RPF2	12	sp|Q9H7B2|RPF2_HUMAN Ribosome production factor 2 homolog OS=Homo sapiens OX=9606 GN=RPF2 PE=1 SV=2	16.7035	20.8688	0	1	-4.16528	-4.5555	0.000172131	0.00117234	No	No	Yes	2.13759	2.60657
Q9H7N4	SCAF1	8	sp|Q9H7N4|SFR19_HUMAN Splicing factor, arginine/serine-rich 19 OS=Homo sapiens OX=9606 GN=SCAF1 PE=1 SV=3	16.7146	20.2425	0	2	-3.52795	-3.85847	0.00026867	0.00127566	Yes	Yes	Yes	0.829108	3.31807
Q9H9A6	LRRC40	24	sp|Q9H9A6|LRC40_HUMAN Leucine-rich repeat-containing protein 40 OS=Homo sapiens OX=9606 GN=LRRC40 PE=1 SV=1	16.7458	19.9792	0	1	-3.23345	-3.53638	0.000443262	0.00143331	No	No	Yes	1.82783	3.34328
Q9H9B4	SFXN1	20	sp|Q9H9B4|SFXN1_HUMAN Sideroflexin-1 OS=Homo sapiens OX=9606 GN=SFXN1 PE=1 SV=4	21.7579	16.1937	1	0	5.56416	6.08544	0.000124072	0.00117234	No	No	Yes	2.05361	3.32414
Q9HB71	CACYBP	19	sp|Q9HB71|CYBP_HUMAN Calcyclin-binding protein OS=Homo sapiens OX=9606 GN=CACYBP PE=1 SV=2	23.2778	16.1249	1	0	7.1529	7.82301	0.000116735	0.00117234	No	No	Yes	2.354	2.91237
Q9HC38	GLOD4	15	sp|Q9HC38|GLOD4_HUMAN Glyoxalase domain-containing protein 4 OS=Homo sapiens OX=9606 GN=GLOD4 PE=1 SV=1	21.6686	16.201	1	0	5.4676	5.97983	0.000296325	0.00130279	No	No	Yes	1.85194	2.99599
Q9HCC0	MCCC2	27	sp|Q9HCC0|MCCB_HUMAN Methylcrotonoyl-CoA carboxylase beta chain, mitochondrial OS=Homo sapiens OX=9606 GN=MCCC2 PE=1 SV=1	19.3694	16.146	1	0	3.22339	3.52538	0.000641009	0.00166256	No	No	Yes	1.56122	3.28958
Q9HCY8	S100A14	5	sp|Q9HCY8|S10AE_HUMAN Protein S100-A14 OS=Homo sapiens OX=9606 GN=S100A14 PE=1 SV=1	20.1088	19.0021	1	3	1.10664	1.21032	0.206222	0.263635	No	No	No
Q9NQ29	LUC7L	8	sp|Q9NQ29|LUC7L_HUMAN Putative RNA-binding protein Luc7-like 1 OS=Homo sapiens OX=9606 GN=LUC7L PE=1 SV=1	19.155	18.5427	1	1	0.612329	0.669695	0.0398038	0.0610408	No	No	Yes	1.49632	1.58692
Q9NR30	DDX21	63	sp|Q9NR30|DDX21_HUMAN Nucleolar RNA helicase 2 OS=Homo sapiens OX=9606 GN=DDX21 PE=1 SV=5	21.9433	22.2022	4	4	-0.258965	-0.283226	0.824873	0.860775	No	No	Yes	2.94276	3.35938
Q9NR45	NANS	13	sp|Q9NR45|SIAS_HUMAN Sialic acid synthase OS=Homo sapiens OX=9606 GN=NANS PE=1 SV=2	20.1927	16.1762	1	0	4.01651	4.3928	0.000968982	0.00209804	No	No	No		3.28446
Q9NSD9	FARSB	24	sp|Q9NSD9|SYFB_HUMAN Phenylalanine--tRNA ligase beta subunit OS=Homo sapiens OX=9606 GN=FARSB PE=1 SV=3	20.3647	16.1854	1	0	4.17929	4.57083	0.000182529	0.00117234	No	No	Yes	1.59397	3.24855
Q9NSE4	IARS2	42	sp|Q9NSE4|SYIM_HUMAN Isoleucine--tRNA ligase, mitochondrial OS=Homo sapiens OX=9606 GN=IARS2 PE=1 SV=2	20.2304	16.1596	2	0	4.07084	4.45221	0.00025987	0.0012709	Yes	Yes	Yes	2.12195	3.3944
Q9NT22	EMILIN3	1	sp|Q9NT22|EMIL3_HUMAN EMILIN-3 OS=Homo sapiens OX=9606 GN=EMILIN3 PE=1 SV=2	16.7352	17.1731	0	1	-0.437848	-0.478868	0.081305	0.115998	No	No	Yes	0.844468	2.4751
Q9NTJ3	SMC4	46	sp|Q9NTJ3|SMC4_HUMAN Structural maintenance of chromosomes protein 4 OS=Homo sapiens OX=9606 GN=SMC4 PE=1 SV=2	18.888	16.1868	2	0	2.70118	2.95424	0.00131884	0.00269887	Yes	Yes	Yes	2.93365	3.69381
Q9NTK5	OLA1	17	sp|Q9NTK5|OLA1_HUMAN Obg-like ATPase 1 OS=Homo sapiens OX=9606 GN=OLA1 PE=1 SV=2	20.5384	16.1379	1	0	4.40048	4.81274	0.00121504	0.0025092	No	No	Yes	2.0157	3.05406
Q9NTZ6	RBM12	14	sp|Q9NTZ6|RBM12_HUMAN RNA-binding protein 12 OS=Homo sapiens OX=9606 GN=RBM12 PE=1 SV=1	19.3089	16.2131	1	0	3.0958	3.38582	0.000763362	0.00183682	No	No	Yes	1.87425	3.14241
Q9NUU7	DDX19A	6	sp|Q9NUU7|DD19A_HUMAN ATP-dependent RNA helicase DDX19A OS=Homo sapiens OX=9606 GN=DDX19A PE=1 SV=1	20.8621	16.1061	1	0	4.75594	5.2015	0.000491147	0.00147411	No	No	Yes	1.77122	3.34033
Q9NVI7	ATAD3A	10	sp|Q9NVI7|ATD3A_HUMAN ATPase family AAA domain-containing protein 3A OS=Homo sapiens OX=9606 GN=ATAD3A PE=1 SV=2	20.3642	20.3749	4	2	-0.0107731	-0.0117823	0.977113	0.984121	No	No	Yes	1.16165	3.50891
Q9NVJ2	ARL8B	3	sp|Q9NVJ2|ARL8B_HUMAN ADP-ribosylation factor-like protein 8B OS=Homo sapiens OX=9606 GN=ARL8B PE=1 SV=1	20.3072	16.1949	1	0	4.11233	4.49759	0.000163788	0.00117234	No	No	Yes	1.70834	3.11135
Q9NVP1	DDX18	31	sp|Q9NVP1|DDX18_HUMAN ATP-dependent RNA helicase DDX18 OS=Homo sapiens OX=9606 GN=DDX18 PE=1 SV=2	19.4776	20.8136	2	2	-1.33604	-1.46121	0.0493696	0.0743191	No	No	Yes	2.35717	3.29969
Q9NW13	RBM28	23	sp|Q9NW13|RBM28_HUMAN RNA-binding protein 28 OS=Homo sapiens OX=9606 GN=RBM28 PE=1 SV=3	16.6889	18.7539	0	1	-2.06503	-2.25849	0.000297367	0.00130279	No	No	Yes	1.90648	3.09225
Q9NX58	LYAR	16	sp|Q9NX58|LYAR_HUMAN Cell growth-regulating nucleolar protein OS=Homo sapiens OX=9606 GN=LYAR PE=1 SV=2	19.0809	22.2278	2	1	-3.14688	-3.44169	0.00019188	0.00117234	No	No	Yes	2.03336	3.02173
Q9NX62	IMPAD1	3	sp|Q9NX62|IMPA3_HUMAN Golgi-resident adenosine 3,5-bisphosphate 3-phosphatase OS=Homo sapiens OX=9606 GN=BPNT2 PE=1 SV=1	21.491	16.1616	1	0	5.32936	5.82864	0.000198482	0.00117995	No	No	Yes	1.98714	3.5984
Q9NYF8	BCLAF1	42	sp|Q9NYF8|BCLF1_HUMAN Bcl-2-associated transcription factor 1 OS=Homo sapiens OX=9606 GN=BCLAF1 PE=1 SV=2	21.6793	22.236	2	2	-0.556697	-0.608851	0.352929	0.426203	No	No	Yes	2.52082	2.61535
Q9NZI8	IGF2BP1	29	sp|Q9NZI8|IF2B1_HUMAN Insulin-like growth factor 2 mRNA-binding protein 1 OS=Homo sapiens OX=9606 GN=IGF2BP1 PE=1 SV=2	22.3677	20.1116	4	1	2.25613	2.46749	0.00188643	0.00365629	Yes	Yes	Yes	1.93661	2.74118
Q9NZT1	CALML5	7	sp|Q9NZT1|CALL5_HUMAN Calmodulin-like protein 5 OS=Homo sapiens OX=9606 GN=CALML5 PE=1 SV=2	24.2895	22.7118	1	1	1.57773	1.72554	0.0151148	0.0253116	No	No	No		1.40364
Q9P035	HACD3	16	sp|Q9P035|HACD3_HUMAN Very-long-chain (3R)-3-hydroxyacyl-CoA dehydratase 3 OS=Homo sapiens OX=9606 GN=HACD3 PE=1 SV=2	20.6957	21.0439	1	1	-0.348182	-0.380801	0.316245	0.386653	No	No	Yes	2.56128	3.76739
Q9P0M6	H2AFY2	14	sp|Q9P0M6|H2AW_HUMAN Core histone macro-H2A.2 OS=Homo sapiens OX=9606 GN=MACROH2A2 PE=1 SV=3	19.5033	20.98	1	2	-1.47672	-1.61507	0.102496	0.142107	No	No	Yes	1.82319	3.21177
Q9P209	CEP72	8	sp|Q9P209|CEP72_HUMAN Centrosomal protein of 72 kDa OS=Homo sapiens OX=9606 GN=CEP72 PE=1 SV=2	16.693	20.734	0	1	-4.04097	-4.41955	0.000216119	0.00118099	No	No	Yes	0.8384	2.06666
Q9P258	RCC2	23	sp|Q9P258|RCC2_HUMAN Protein RCC2 OS=Homo sapiens OX=9606 GN=RCC2 PE=1 SV=2	21.0691	19.69	1	1	1.3791	1.5083	0.00853526	0.0147196	No	No	Yes	2.12621	3.23672
Q9P2J5	LARS	49	sp|Q9P2J5|SYLC_HUMAN Leucine--tRNA ligase, cytoplasmic OS=Homo sapiens OX=9606 GN=LARS1 PE=1 SV=2	19.128	16.1558	2	0	2.97212	3.25056	0.001123	0.00236383	Yes	Yes	Yes	2.27907	3.77638
Q9P2R7	SUCLA2	18	sp|Q9P2R7|SUCB1_HUMAN Succinate--CoA ligase [ADP-forming] subunit beta, mitochondrial OS=Homo sapiens OX=9606 GN=SUCLA2 PE=1 SV=3	20.1315	16.1754	2	0	3.95612	4.32674	0.000264873	0.00127566	Yes	Yes	Yes	1.436	3.40159
Q9P2S5	WRAP73	9	sp|Q9P2S5|WRP73_HUMAN WD repeat-containing protein WRAP73 OS=Homo sapiens OX=9606 GN=WRAP73 PE=1 SV=1	16.6916	17.5305	0	1	-0.838874	-0.917464	0.00226302	0.0042945	No	No	Yes	1.10632	3.58006
Q9UBC9	SPRR3	10	sp|Q9UBC9|SPRR3_HUMAN Small proline-rich protein 3 OS=Homo sapiens OX=9606 GN=SPRR3 PE=1 SV=2	22.197	23.3909	2	1	-1.19392	-1.30577	0.0168507	0.0280274	No	No	No
Q9UBG3	CRNN	13	sp|Q9UBG3|CRNN_HUMAN Cornulin OS=Homo sapiens OX=9606 GN=CRNN PE=1 SV=1	20.1572	21.6742	3	2	-1.51702	-1.65915	0.315334	0.386019	No	No	No		2.80468
Q9UBQ0	VPS29	5	sp|Q9UBQ0|VPS29_HUMAN Vacuolar protein sorting-associated protein 29 OS=Homo sapiens OX=9606 GN=VPS29 PE=1 SV=1	21.1718	16.1557	1	0	5.01614	5.48608	0.00104235	0.0022199	No	No	Yes	1.80791	3.12975
Q9UBQ7	GRHPR	15	sp|Q9UBQ7|GRHPR_HUMAN Glyoxylate reductase/hydroxypyruvate reductase OS=Homo sapiens OX=9606 GN=GRHPR PE=1 SV=1	20.4024	16.1579	1	0	4.24446	4.6421	0.000503691	0.00149586	No	No	Yes	1.85414	3.23409
Q9UG63	ABCF2	20	sp|Q9UG63|ABCF2_HUMAN ATP-binding cassette sub-family F member 2 OS=Homo sapiens OX=9606 GN=ABCF2 PE=1 SV=2	19.3605	16.1721	1	0	3.18839	3.4871	0.000436537	0.00143331	No	No	Yes	1.75299	3.24415
Q9UHB9	SRP68	25	sp|Q9UHB9|SRP68_HUMAN Signal recognition particle subunit SRP68 OS=Homo sapiens OX=9606 GN=SRP68 PE=1 SV=2	20.1192	20.4288	1	1	-0.309685	-0.338697	0.455477	0.531751	No	No	Yes	1.67825	3.41743
Q9UIF8	BAZ2B	2	sp|Q9UIF8|BAZ2B_HUMAN Bromodomain adjacent to zinc finger domain protein 2B OS=Homo sapiens OX=9606 GN=BAZ2B PE=1 SV=3	16.7004	19.7135	0	1	-3.01314	-3.29542	0.000546618	0.00155755	No	No	Yes	1.61496	3.26602
Q9UII2	ATPIF1	11	sp|Q9UII2|ATIF1_HUMAN ATPase inhibitor, mitochondrial OS=Homo sapiens OX=9606 GN=ATP5IF1 PE=1 SV=1	22.1118	16.141	1	0	5.97076	6.53012	0.000121678	0.00117234	No	No	Yes	2.60351	1.8815
Q9UJS0	SLC25A13	23	sp|Q9UJS0|CMC2_HUMAN Calcium-binding mitochondrial carrier protein Aralar2 OS=Homo sapiens OX=9606 GN=SLC25A13 PE=1 SV=2	19.4516	16.1853	1	0	3.2663	3.5723	0.00138143	0.00279413	No	No	Yes	1.58317	3.58779
Q9UJZ1	STOML2	25	sp|Q9UJZ1|STML2_HUMAN Stomatin-like protein 2, mitochondrial OS=Homo sapiens OX=9606 GN=STOML2 PE=1 SV=1	20.9776	16.1926	1	0	4.78501	5.23329	0.000217631	0.00118099	No	No	Yes	2.14988	2.8212
Q9UK76	HN1	6	sp|Q9UK76|JUPI1_HUMAN Jupiter microtubule associated homolog 1 OS=Homo sapiens OX=9606 GN=JPT1 PE=1 SV=3	21.563	16.1729	1	0	5.39017	5.89515	0.000551166	0.00155755	No	No	No		1.09726
Q9UKK9	NUDT5	12	sp|Q9UKK9|NUDT5_HUMAN ADP-sugar pyrophosphatase OS=Homo sapiens OX=9606 GN=NUDT5 PE=1 SV=1	19.868	16.1836	1	0	3.68446	4.02964	0.000919363	0.00203081	No	No	Yes	2.07847	3.02061
Q9UKM9	RALY	21	sp|Q9UKM9|RALY_HUMAN RNA-binding protein Raly OS=Homo sapiens OX=9606 GN=RALY PE=1 SV=1	20.7822	16.1852	1	0	4.597	5.02766	0.00028122	0.00127566	No	No	Yes	1.45369	2.31288
Q9UKV3	ACIN1	41	sp|Q9UKV3|ACINU_HUMAN Apoptotic chromatin condensation inducer in the nucleus OS=Homo sapiens OX=9606 GN=ACIN1 PE=1 SV=2	20.8908	22.3109	2	1	-1.42006	-1.5531	0.0681863	0.0990061	No	No	Yes	2.05012	2.45378
Q9ULV4	CORO1C	26	sp|Q9ULV4|COR1C_HUMAN Coronin-1C OS=Homo sapiens OX=9606 GN=CORO1C PE=1 SV=1	20.2677	16.1769	1	0	4.0908	4.47404	0.000222379	0.00118161	No	No	Yes	1.5086	3.32846
Q9UMS4	PRPF19	24	sp|Q9UMS4|PRP19_HUMAN Pre-mRNA-processing factor 19 OS=Homo sapiens OX=9606 GN=PRPF19 PE=1 SV=1	22.4744	16.1872	1	0	6.28717	6.87618	0.000274786	0.00127566	No	No	Yes	1.74548	2.99906
Q9UN86	G3BP2	12	sp|Q9UN86|G3BP2_HUMAN Ras GTPase-activating protein-binding protein 2 OS=Homo sapiens OX=9606 GN=G3BP2 PE=1 SV=2	20.5797	16.1759	1	0	4.40383	4.8164	0.000399225	0.00140801	No	No	Yes	2.06411	3.13154
Q9UPN4	CEP131	123	sp|Q9UPN4|CP131_HUMAN Centrosomal protein of 131 kDa OS=Homo sapiens OX=9606 GN=CEP131 PE=1 SV=3	23.363	24.5583	4	4	-1.19532	-1.3073	0.0873257	0.123158	No	No	Yes	0.898012	2.54244
Q9UQ35	SRRM2	73	sp|Q9UQ35|SRRM2_HUMAN Serine/arginine repetitive matrix protein 2 OS=Homo sapiens OX=9606 GN=SRRM2 PE=1 SV=2	24.1419	24.7844	4	4	-0.642431	-0.702617	0.0643491	0.0938503	No	No	Yes	2.39589	2.77765
Q9UQ80	PA2G4	32	sp|Q9UQ80|PA2G4_HUMAN Proliferation-associated protein 2G4 OS=Homo sapiens OX=9606 GN=PA2G4 PE=1 SV=3	19.745	20.0449	3	1	-0.299868	-0.327961	0.801595	0.840948	No	No	Yes	2.65945	2.7371
Q9Y230	RUVBL2	35	sp|Q9Y230|RUVB2_HUMAN RuvB-like 2 OS=Homo sapiens OX=9606 GN=RUVBL2 PE=1 SV=3	21.3314	16.1379	1	0	5.19347	5.68002	9.06643e-05	0.00117234	No	No	Yes	1.47031	3.31677
Q9Y265	RUVBL1	28	sp|Q9Y265|RUVB1_HUMAN RuvB-like 1 OS=Homo sapiens OX=9606 GN=RUVBL1 PE=1 SV=1	20.5419	19.4121	2	1	1.12978	1.23562	0.224772	0.283634	No	No	Yes	2.04601	3.04065
Q9Y266	NUDC	14	sp|Q9Y266|NUDC_HUMAN Nuclear migration protein nudC OS=Homo sapiens OX=9606 GN=NUDC PE=1 SV=1	20.5033	16.1816	1	0	4.32174	4.72662	2.15721e-05	0.00103733	No	No	Yes	1.61671	2.83451
Q9Y277	VDAC3	16	sp|Q9Y277|VDAC3_HUMAN Voltage-dependent anion-selective channel protein 3 OS=Homo sapiens OX=9606 GN=VDAC3 PE=1 SV=1	22.508	16.2364	1	0	6.27163	6.85918	0.000147334	0.00117234	No	No	Yes	2.00218	2.99953
Q9Y285	FARSA	14	sp|Q9Y285|SYFA_HUMAN Phenylalanine--tRNA ligase alpha subunit OS=Homo sapiens OX=9606 GN=FARSA PE=1 SV=3	19.1342	16.1906	1	0	2.94356	3.21933	0.0014636	0.00293616	No	No	Yes	1.78752	2.74012
Q9Y295	DRG1	17	sp|Q9Y295|DRG1_HUMAN Developmentally-regulated GTP-binding protein 1 OS=Homo sapiens OX=9606 GN=DRG1 PE=1 SV=1	19.5197	20.4387	1	1	-0.918961	-1.00505	0.0177582	0.0294372	No	No	Yes	1.76894	3.19573
Q9Y2D8	SSX2IP	17	sp|Q9Y2D8|ADIP_HUMAN Afadin- and alpha-actinin-binding protein OS=Homo sapiens OX=9606 GN=SSX2IP PE=1 SV=3	16.7067	19.3556	0	3	-2.64891	-2.89707	0.0454261	0.068804	No	No	Yes	1.88217	2.91158
Q9Y2L1	DIS3	34	sp|Q9Y2L1|RRP44_HUMAN Exosome complex exonuclease RRP44 OS=Homo sapiens OX=9606 GN=DIS3 PE=1 SV=2	20.7067	20.0487	2	1	0.658039	0.719688	0.0903908	0.127116	No	No	Yes	2.13674	3.64653
Q9Y2Q3	GSTK1	10	sp|Q9Y2Q3|GSTK1_HUMAN Glutathione S-transferase kappa 1 OS=Homo sapiens OX=9606 GN=GSTK1 PE=1 SV=3	19.4918	16.1376	1	0	3.35412	3.66835	0.000318549	0.00131525	No	No	Yes	1.72977	2.85
Q9Y2S6	TMA7	4	sp|Q9Y2S6|TMA7_HUMAN Translation machinery-associated protein 7 OS=Homo sapiens OX=9606 GN=TMA7 PE=1 SV=1	19.8671	16.126	1	0	3.7411	4.09158	0.000631336	0.00166154	No	No	Yes	2.42864
Q9Y2W1	THRAP3	45	sp|Q9Y2W1|TR150_HUMAN Thyroid hormone receptor-associated protein 3 OS=Homo sapiens OX=9606 GN=THRAP3 PE=1 SV=2	20.7154	19.9337	2	3	0.7817	0.854933	0.541791	0.611479	No	No	Yes	2.403	2.6442
Q9Y2W2	WBP11	17	sp|Q9Y2W2|WBP11_HUMAN WW domain-binding protein 11 OS=Homo sapiens OX=9606 GN=WBP11 PE=1 SV=1	19.4585	16.1574	1	0	3.30102	3.61028	0.000495536	0.00148058	No	No	Yes	2.06947	1.44809
Q9Y2X3	NOP58	25	sp|Q9Y2X3|NOP58_HUMAN Nucleolar protein 58 OS=Homo sapiens OX=9606 GN=NOP58 PE=1 SV=1	20.3375	22.3254	2	1	-1.98793	-2.17417	0.0247031	0.0402706	No	No	Yes	2.51685	3.30879
Q9Y2Z4	YARS2	19	sp|Q9Y2Z4|SYYM_HUMAN Tyrosine--tRNA ligase, mitochondrial OS=Homo sapiens OX=9606 GN=YARS2 PE=1 SV=2	19.282	16.2275	4	0	3.05444	3.34059	0.00220092	0.00419283	Yes	Yes	Yes	1.27495	3.41085
Q9Y383	LUC7L2	15	sp|Q9Y383|LC7L2_HUMAN Putative RNA-binding protein Luc7-like 2 OS=Homo sapiens OX=9606 GN=LUC7L2 PE=1 SV=2	22.4227	22.4892	4	4	-0.0665441	-0.0727783	0.728656	0.777708	No	No	Yes	1.89708	0.649335
Q9Y3D5	MRPS18C	4	sp|Q9Y3D5|RT18C_HUMAN 28S ribosomal protein S18c, mitochondrial OS=Homo sapiens OX=9606 GN=MRPS18C PE=1 SV=1	16.7114	19.4591	0	1	-2.74765	-3.00506	9.30253e-05	0.00117234	No	No	Yes	1.91928	2.8189
Q9Y3F4	STRAP	21	sp|Q9Y3F4|STRAP_HUMAN Serine-threonine kinase receptor-associated protein OS=Homo sapiens OX=9606 GN=STRAP PE=1 SV=1	21.1119	16.1092	1	0	5.00274	5.47141	0.00045271	0.00143553	No	No	Yes	2.25971	3.03958
Q9Y3I0	RTCB	34	sp|Q9Y3I0|RTCB_HUMAN RNA-splicing ligase RtcB homolog OS=Homo sapiens OX=9606 GN=RTCB PE=1 SV=1	20.3772	19.9478	4	1	0.429373	0.469599	0.458214	0.533678	No	No	Yes	1.75151	2.48214
Q9Y3T9	NOC2L	20	sp|Q9Y3T9|NOC2L_HUMAN Nucleolar complex protein 2 homolog OS=Homo sapiens OX=9606 GN=NOC2L PE=1 SV=4	16.6927	19.2467	0	1	-2.55408	-2.79336	4.29232e-05	0.00117234	No	No	Yes	1.44152	3.68959
Q9Y3U8	RPL36	10	sp|Q9Y3U8|RL36_HUMAN 60S ribosomal protein L36 OS=Homo sapiens OX=9606 GN=RPL36 PE=1 SV=3	22.1952	22.7332	4	4	-0.538024	-0.588428	0.164848	0.218097	No	No	Yes	2.85443	0.905796
Q9Y3Y2	CHTOP	5	sp|Q9Y3Y2|CHTOP_HUMAN Chromatin target of PRMT1 protein OS=Homo sapiens OX=9606 GN=CHTOP PE=1 SV=2	19.6306	19.9072	1	1	-0.276588	-0.3025	0.362292	0.435371	No	No	Yes	2.03828	-0.187087
Q9Y3Z3	SAMHD1	16	sp|Q9Y3Z3|SAMH1_HUMAN Deoxynucleoside triphosphate triphosphohydrolase SAMHD1 OS=Homo sapiens OX=9606 GN=SAMHD1 PE=1 SV=2	20.5518	16.139	1	0	4.41286	4.82628	0.000112493	0.00117234	No	No	Yes	1.64383	2.76308
Q9Y490	TLN1	129	sp|Q9Y490|TLN1_HUMAN Talin-1 OS=Homo sapiens OX=9606 GN=TLN1 PE=1 SV=3	20.5239	19.187	1	1	1.33691	1.46216	0.0142858	0.023964	No	No	Yes	1.96282	3.64885
Q9Y4L1	HYOU1	56	sp|Q9Y4L1|HYOU1_HUMAN Hypoxia up-regulated protein 1 OS=Homo sapiens OX=9606 GN=HYOU1 PE=1 SV=1	20.0316	16.181	1	0	3.85054	4.21128	0.000954099	0.00207495	No	No	Yes	1.80435	3.40647
Q9Y520	PRRC2C	20	sp|Q9Y520|PRC2C_HUMAN Protein PRRC2C OS=Homo sapiens OX=9606 GN=PRRC2C PE=1 SV=4	26.4602	16.1793	1	0	10.281	11.2441	6.07102e-05	0.00117234	No	No	Yes	2.66569	2.98801
Q9Y5A9	YTHDF2	7	sp|Q9Y5A9|YTHD2_HUMAN YTH domain-containing family protein 2 OS=Homo sapiens OX=9606 GN=YTHDF2 PE=1 SV=2	19.7615	16.1142	1	0	3.6473	3.989	0.000867955	0.00195967	No	No	Yes	1.9335	2.907
Q9Y5B9	SUPT16H	50	sp|Q9Y5B9|SP16H_HUMAN FACT complex subunit SPT16 OS=Homo sapiens OX=9606 GN=SUPT16H PE=1 SV=1	21.1522	20.2188	2	2	0.933372	1.02081	0.287587	0.354703	No	No	Yes	2.61823	3.63146
Q9Y5J1	UTP18	20	sp|Q9Y5J1|UTP18_HUMAN U3 small nucleolar RNA-associated protein 18 homolog OS=Homo sapiens OX=9606 GN=UTP18 PE=1 SV=3	16.6676	18.8511	0	1	-2.18355	-2.38811	0.000330564	0.00132091	No	No	Yes	1.90433	3.26271
Q9Y5S9	RBM8A	10	sp|Q9Y5S9|RBM8A_HUMAN RNA-binding protein 8A OS=Homo sapiens OX=9606 GN=RBM8A PE=1 SV=1	20.8195	21.4628	1	1	-0.643221	-0.703481	0.0954499	0.133467	No	No	Yes	2.31101	2.76723
Q9Y617	PSAT1	18	sp|Q9Y617|SERC_HUMAN Phosphoserine aminotransferase OS=Homo sapiens OX=9606 GN=PSAT1 PE=1 SV=2	21.3212	16.1536	1	0	5.16764	5.65177	0.000282902	0.00127566	No	No	Yes	2.36805	3.4083
Q9Y678	COPG1	35	sp|Q9Y678|COPG1_HUMAN Coatomer subunit gamma-1 OS=Homo sapiens OX=9606 GN=COPG1 PE=1 SV=1	18.8547	16.1266	2	0	2.72803	2.98361	0.000618697	0.00163819	Yes	Yes	Yes	1.52671	3.74266
Q9Y6C9	MTCH2	13	sp|Q9Y6C9|MTCH2_HUMAN Mitochondrial carrier homolog 2 OS=Homo sapiens OX=9606 GN=MTCH2 PE=1 SV=1	21.5124	16.1475	1	0	5.36488	5.86748	0.000461521	0.00144707	No	No	Yes	2.12572	3.51355

## Sheet: U2OS - ATM KO v. WT - INS
Protein.ID	Gene.name	Peptide.counts..unique.	Fasta.headers	avg.Case.log.intensity	avg.Control.log.intensity	avg.Case.num.reps	avg.Control.num.reps	log2foldChange	log2foldChange.adjusted	p.value	p.adjust.value	Significant	Significant.adjusted	Identified in ctrl RNAseq?	log10(CPMs ctrl)	TANGO
A0AVT1	UBA6	19	sp|A0AVT1|UBA6_HUMAN Ubiquitin-like modifier-activating enzyme 6 OS=Homo sapiens OX=9606 GN=UBA6 PE=1 SV=1	23.4378	23.6127	2	1	-0.174967	-0.177065	0.00184469	0.00536664	No	No	Yes	1.86312	3.40885
A1L0T0	ILVBL	17	sp|A1L0T0|HACL2_HUMAN 2-hydroxyacyl-CoA lyase 2 OS=Homo sapiens OX=9606 GN=ILVBL PE=1 SV=2	20.3314	19.3846	3	0	0.946853	0.95821	0.112562	0.188152	No	No	Yes	1.50803	3.72044
A3QJZ7	LOC101929983	1	sp|A3QJZ7|PRA27_HUMAN PRAME family member 27 OS=Homo sapiens OX=9606 GN=PRAMEF27 PE=3 SV=2;sp|H0Y7S4|PRA26_HUMAN Putative PRAME family member 26 OS=Homo sapiens OX=9606 GN=PRAMEF26 PE=5 SV=2;sp|Q5VXH4|PRAM6_HUMAN PRAME family member 6 OS=Homo sapiens OX=96	18.1614	19.4042	1	0	-1.24283	-1.25774	6.66559e-08	7.46854e-07	No	No	No		3.4566
A5YKK6	CNOT1	20	sp|A5YKK6|CNOT1_HUMAN CCR4-NOT transcription complex subunit 1 OS=Homo sapiens OX=9606 GN=CNOT1 PE=1 SV=2	23.3775	21.6717	4	3	1.70588	1.72634	0.109135	0.183147	No	No	Yes	1.97942	4.15022
A6NCK2	TRIM43B	10	sp|A6NCK2|TR43B_HUMAN Tripartite motif-containing protein 43B OS=Homo sapiens OX=9606 GN=TRIM43B PE=3 SV=3;sp|Q96BQ3|TRI43_HUMAN Tripartite motif-containing protein 43 OS=Homo sapiens OX=9606 GN=TRIM43 PE=1 SV=1	22.3412	19.4192	3	0	2.92205	2.9571	0.0671255	0.126955	No	No	No		3.31049
A6NDI0	TRIM49B	2	sp|A6NDI0|TR49B_HUMAN Putative tripartite motif-containing protein 49B OS=Homo sapiens OX=9606 GN=TRIM49B PE=2 SV=1	20.4022	19.3831	2	0	1.01907	1.03129	4.38305e-07	3.2819e-06	Yes	Yes	No		3.3399
A6NHL2	TUBAL3	1	sp|A6NHL2|TBAL3_HUMAN Tubulin alpha chain-like 3 OS=Homo sapiens OX=9606 GN=TUBAL3 PE=1 SV=2	19.0327	19.369	1	0	-0.33633	-0.340364	0.000454944	0.00148161	No	No	No		2.9385
A6NHR9	SMCHD1	55	sp|A6NHR9|SMHD1_HUMAN Structural maintenance of chromosomes flexible hinge domain-containing protein 1 OS=Homo sapiens OX=9606 GN=SMCHD1 PE=1 SV=2	25.4396	24.0867	4	4	1.35289	1.36911	0.0797587	0.143283	No	No	Yes	2.59393	3.86426
C9J1S8	TRIM49D1	5	sp|C9J1S8|TR49D_HUMAN Tripartite motif-containing protein 49D OS=Homo sapiens OX=9606 GN=TRIM49D1 PE=2 SV=1	21.8959	19.422	3	0	2.47381	2.50349	0.0663056	0.12618	No	No	No		3.09806
E9PAV3	NACA	8	sp|E9PAV3|NACAM_HUMAN Nascent polypeptide-associated complex subunit alpha, muscle-specific form OS=Homo sapiens OX=9606 GN=NACA PE=1 SV=1;sp|Q13765|NACA_HUMAN Nascent polypeptide-associated complex subunit alpha OS=Homo sapiens OX=9606 GN=NACA PE=1 SV=1	22.5805	19.3929	2	0	3.18755	3.22579	2.45698e-06	1.39841e-05	Yes	Yes	No		3.24945
F8VTS6	RFPL4AL1	4	sp|F8VTS6|RFAL1_HUMAN Ret finger protein-like 4A-like protein 1 OS=Homo sapiens OX=9606 GN=RFPL4AL1 PE=2 SV=1;sp|A6NLU0|RFPLA_HUMAN Ret finger protein-like 4A OS=Homo sapiens OX=9606 GN=RFPL4A PE=1 SV=3	22.4365	19.4209	2	0	3.01567	3.05184	8.87081e-08	9.20851e-07	Yes	Yes	No		3.07891
O00116	AGPS	33	sp|O00116|ADAS_HUMAN Alkyldihydroxyacetonephosphate synthase, peroxisomal OS=Homo sapiens OX=9606 GN=AGPS PE=1 SV=1	25.1798	24.5402	4	4	0.639638	0.64731	0.12764	0.208027	No	No	Yes	1.94605	3.37806
O00139	KIF2A	21	sp|O00139|KIF2A_HUMAN Kinesin-like protein KIF2A OS=Homo sapiens OX=9606 GN=KIF2A PE=1 SV=3	24.2818	24.1518	4	4	0.129918	0.131477	0.509072	0.604337	No	No	Yes	2.20561	3.19399
O00148	DDX39A	14	sp|O00148|DX39A_HUMAN ATP-dependent RNA helicase DDX39A OS=Homo sapiens OX=9606 GN=DDX39A PE=1 SV=2	23.2577	23.3946	4	4	-0.136906	-0.138548	0.494157	0.591241	No	No	Yes	1.37921	3.52337
O00154	ACOT7	12	sp|O00154|BACH_HUMAN Cytosolic acyl coenzyme A thioester hydrolase OS=Homo sapiens OX=9606 GN=ACOT7 PE=1 SV=3	21.8841	22.6611	1	1	-0.777019	-0.78634	0.000119651	0.000428632	No	No	Yes	1.24849	2.91941
O00159	MYO1C	50	sp|O00159|MYO1C_HUMAN Unconventional myosin-Ic OS=Homo sapiens OX=9606 GN=MYO1C PE=1 SV=4	26.1325	26.1707	4	4	-0.0382116	-0.03867	0.811135	0.861095	No	No	Yes	1.83399	3.62468
O00170	AIP	8	sp|O00170|AIP_HUMAN AH receptor-interacting protein OS=Homo sapiens OX=9606 GN=AIP PE=1 SV=2	21.3634	21.7082	3	1	-0.344772	-0.348908	0.701793	0.775197	No	No	Yes	1.16918	1.81981
O00192	ARVCF	17	sp|O00192|ARVC_HUMAN Armadillo repeat protein deleted in velo-cardio-facial syndrome OS=Homo sapiens OX=9606 GN=ARVCF PE=1 SV=1	21.5319	19.3782	3	0	2.15369	2.17952	0.0929878	0.161645	No	No	Yes	1.15774	3.4523
O00203	AP3B1	12	sp|O00203|AP3B1_HUMAN AP-3 complex subunit beta-1 OS=Homo sapiens OX=9606 GN=AP3B1 PE=1 SV=3	22.3062	22.1765	4	1	0.129712	0.131268	0.0514279	0.106409	No	No	Yes	1.54096	3.8153
O00231	PSMD11	21	sp|O00231|PSD11_HUMAN 26S proteasome non-ATPase regulatory subunit 11 OS=Homo sapiens OX=9606 GN=PSMD11 PE=1 SV=3	23.6174	22.0776	4	3	1.53984	1.55832	0.185658	0.278946	No	No	Yes	1.99694	3.11587
O00232	PSMD12	24	sp|O00232|PSD12_HUMAN 26S proteasome non-ATPase regulatory subunit 12 OS=Homo sapiens OX=9606 GN=PSMD12 PE=1 SV=3	24.1641	24.0081	4	4	0.156014	0.157886	0.836405	0.87992	No	No	Yes	2.12833	3.2698
O00267	SUPT5H	25	sp|O00267|SPT5H_HUMAN Transcription elongation factor SPT5 OS=Homo sapiens OX=9606 GN=SUPT5H PE=1 SV=1	21.3402	19.4092	1	0	1.93095	1.95411	3.16552e-05	0.000126551	No	No	Yes	1.50739	3.31194
O00291	HIP1	7	sp|O00291|HIP1_HUMAN Huntingtin-interacting protein 1 OS=Homo sapiens OX=9606 GN=HIP1 PE=1 SV=5	21.9098	19.3663	1	0	2.5435	2.57401	1.50716e-07	1.38371e-06	No	No	Yes	1.7414	3.26535
O00299	CLIC1	14	sp|O00299|CLIC1_HUMAN Chloride intracellular channel protein 1 OS=Homo sapiens OX=9606 GN=CLIC1 PE=1 SV=4	24.7405	24.3151	4	4	0.425384	0.430487	0.263483	0.366629	No	No	Yes	1.79121	2.989
O00303	EIF3F	15	sp|O00303|EIF3F_HUMAN Eukaryotic translation initiation factor 3 subunit F OS=Homo sapiens OX=9606 GN=EIF3F PE=1 SV=1	22.2072	21.7336	4	1	0.473651	0.479333	0.0707176	0.131165	No	No	Yes	1.68726	3.26479
O00391	QSOX1	3	sp|O00391|QSOX1_HUMAN Sulfhydryl oxidase 1 OS=Homo sapiens OX=9606 GN=QSOX1 PE=1 SV=3	22.6128	21.3743	2	3	1.23854	1.25339	0.156191	0.243898	No	No	Yes	1.81249	3.72208
O00410	IPO5	45	sp|O00410|IPO5_HUMAN Importin-5 OS=Homo sapiens OX=9606 GN=IPO5 PE=1 SV=4	25.235	22.4938	4	3	2.7412	2.77408	0.0955537	0.165475	No	No	Yes	2.10428	3.73551
O00429	DNM1L	40	sp|O00429|DNM1L_HUMAN Dynamin-1-like protein OS=Homo sapiens OX=9606 GN=DNM1L PE=1 SV=2	26.1093	21.3403	4	3	4.76897	4.82618	0.00615191	0.0164081	Yes	Yes	Yes	1.89737	3.4895
O00442	RTCA	5	sp|O00442|RTCA_HUMAN RNA 3-terminal phosphate cyclase OS=Homo sapiens OX=9606 GN=RTCA PE=1 SV=1	18.2379	19.0966	0	1	-0.858668	-0.868968	3.57734e-06	1.89994e-05	No	No	Yes	1.17714	3.40653
O00443	PIK3C2A	11	sp|O00443|P3C2A_HUMAN Phosphatidylinositol 4-phosphate 3-kinase C2 domain-containing subunit alpha OS=Homo sapiens OX=9606 GN=PIK3C2A PE=1 SV=2	22.5174	19.4053	4	0	3.11218	3.14951	8.80216e-05	0.00032488	Yes	Yes	Yes	2.34354	3.91381
O00471	EXOC5	9	sp|O00471|EXOC5_HUMAN Exocyst complex component 5 OS=Homo sapiens OX=9606 GN=EXOC5 PE=1 SV=1	22.8026	19.4518	4	0	3.35086	3.39105	9.24757e-11	1.61411e-08	Yes	Yes	Yes	2.18533	3.47382
O00479	HMGN4	4	sp|O00479|HMGN4_HUMAN High mobility group nucleosome-binding domain-containing protein 4 OS=Homo sapiens OX=9606 GN=HMGN4 PE=1 SV=3	21.7826	22.2313	1	1	-0.448703	-0.454085	0.0011202	0.00339969	No	No	Yes	0.273002
O00505	KPNA3	9	sp|O00505|IMA4_HUMAN Importin subunit alpha-4 OS=Homo sapiens OX=9606 GN=KPNA3 PE=1 SV=2	22.6123	22.5203	4	1	0.0919499	0.0930529	0.275056	0.379552	No	No	No		3.5517
O00541	PES1	23	sp|O00541|PESC_HUMAN Pescadillo homolog OS=Homo sapiens OX=9606 GN=PES1 PE=1 SV=1	21.2448	22.165	1	2	-0.920157	-0.931195	0.108545	0.182607	No	No	Yes	1.17724	3.35387
O00567	NOP56	39	sp|O00567|NOP56_HUMAN Nucleolar protein 56 OS=Homo sapiens OX=9606 GN=NOP56 PE=1 SV=4	24.9155	25.1546	4	4	-0.23909	-0.241958	0.71016	0.782547	No	No	Yes	2.12134	3.12469
O00571	DDX3X	53	sp|O00571|DDX3X_HUMAN ATP-dependent RNA helicase DDX3X OS=Homo sapiens OX=9606 GN=DDX3X PE=1 SV=3;sp|O15523|DDX3Y_HUMAN ATP-dependent RNA helicase DDX3Y OS=Homo sapiens OX=9606 GN=DDX3Y PE=1 SV=2	27.1813	26.8908	4	4	0.290491	0.293976	0.0857867	0.150995	No	No	Yes	2.04625	3.30033
O00622	CYR61	18	sp|O00622|CCN1_HUMAN CCN family member 1 OS=Homo sapiens OX=9606 GN=CCN1 PE=1 SV=1	26.4106	25.9665	4	4	0.444026	0.449352	0.463263	0.563128	No	No	Yes	2.70419	2.89954
O00743	PPP6C	6	sp|O00743|PPP6_HUMAN Serine/threonine-protein phosphatase 6 catalytic subunit OS=Homo sapiens OX=9606 GN=PPP6C PE=1 SV=1	20.8713	19.4735	1	0	1.39772	1.41448	1.64093e-07	1.45533e-06	No	No	Yes	1.45837	3.33646
O14531	DPYSL4	5	sp|O14531|DPYL4_HUMAN Dihydropyrimidinase-related protein 4 OS=Homo sapiens OX=9606 GN=DPYSL4 PE=1 SV=2	20.0812	19.4132	1	0	0.668032	0.676045	4.07252e-05	0.000158646	No	No	Yes	0.550389	3.23816
O14578	CIT	82	sp|O14578|CTRO_HUMAN Citron Rho-interacting kinase OS=Homo sapiens OX=9606 GN=CIT PE=1 SV=2	26.6346	26.982	4	4	-0.347385	-0.351552	0.113584	0.189168	No	No	Yes	1.80523	3.63315
O14744	PRMT5	17	sp|O14744|ANM5_HUMAN Protein arginine N-methyltransferase 5 OS=Homo sapiens OX=9606 GN=PRMT5 PE=1 SV=4	20.9308	19.4009	1	0	1.52988	1.54823	2.03805e-07	1.73996e-06	No	No	Yes	1.39333	3.09984
O14776	TCERG1	29	sp|O14776|TCRG1_HUMAN Transcription elongation regulator 1 OS=Homo sapiens OX=9606 GN=TCERG1 PE=1 SV=2	21.7066	19.3879	3	0	2.31864	2.34645	0.137167	0.220408	No	No	Yes	2.39446	3.09575
O14777	NDC80	36	sp|O14777|NDC80_HUMAN Kinetochore protein NDC80 homolog OS=Homo sapiens OX=9606 GN=NDC80 PE=1 SV=1	25.7946	24.1639	4	4	1.6307	1.65026	0.0293596	0.0664683	No	No	Yes	2.43425	3.29789
O14802	POLR3A	6	sp|O14802|RPC1_HUMAN DNA-directed RNA polymerase III subunit RPC1 OS=Homo sapiens OX=9606 GN=POLR3A PE=1 SV=2	21.5501	19.4123	1	0	2.13784	2.16349	2.26942e-06	1.32045e-05	No	No	Yes	1.46342	3.75896
O14818	PSMA7	14	sp|O14818|PSA7_HUMAN Proteasome subunit alpha type-7 OS=Homo sapiens OX=9606 GN=PSMA7 PE=1 SV=1	21.8946	21.9797	3	3	-0.0850992	-0.08612	0.947276	0.964701	No	No	Yes	2.70925	3.3569
O14880	MGST3	7	sp|O14880|MGST3_HUMAN Microsomal glutathione S-transferase 3 OS=Homo sapiens OX=9606 GN=MGST3 PE=1 SV=1	21.8526	22.8418	3	2	-0.989171	-1.00104	0.320208	0.423314	No	No	Yes	2.0649	3.57058
O14908	GIPC1	2	sp|O14908|GIPC1_HUMAN PDZ domain-containing protein GIPC1 OS=Homo sapiens OX=9606 GN=GIPC1 PE=1 SV=2	21.8459	19.4156	1	0	2.43026	2.45942	2.13648e-07	1.80435e-06	No	No	Yes	1.42539	1.97146
O14920	IKBKB	2	sp|O14920|IKKB_HUMAN Inhibitor of nuclear factor kappa-B kinase subunit beta OS=Homo sapiens OX=9606 GN=IKBKB PE=1 SV=1	21.9487	19.3915	1	0	2.55727	2.58794	4.10573e-10	2.77821e-08	No	No	Yes	1.12225	3.20659
O14929	HAT1	11	sp|O14929|HAT1_HUMAN Histone acetyltransferase type B catalytic subunit OS=Homo sapiens OX=9606 GN=HAT1 PE=1 SV=1	23.0846	21.8208	4	3	1.26381	1.27897	0.212209	0.308929	No	No	Yes	1.82628	3.60438
O14965	AURKA	8	sp|O14965|AURKA_HUMAN Aurora kinase A OS=Homo sapiens OX=9606 GN=AURKA PE=1 SV=2	23.3364	22.7785	4	4	0.557955	0.564648	0.0193803	0.0464669	No	No	Yes	2.09959	2.94328
O14979	HNRNPDL	21	sp|O14979|HNRDL_HUMAN Heterogeneous nuclear ribonucleoprotein D-like OS=Homo sapiens OX=9606 GN=HNRNPDL PE=1 SV=3	23.3191	22.9817	4	4	0.337426	0.341473	0.352793	0.456471	No	No	Yes	2.61344	3.0304
O14980	XPO1	37	sp|O14980|XPO1_HUMAN Exportin-1 OS=Homo sapiens OX=9606 GN=XPO1 PE=1 SV=1	25.1919	24.1621	4	4	1.0298	1.04215	0.0589533	0.118883	No	No	Yes	2.39365	4.00243
O14981	BTAF1	3	sp|O14981|BTAF1_HUMAN TATA-binding protein-associated factor 172 OS=Homo sapiens OX=9606 GN=BTAF1 PE=1 SV=2	18.9484	19.3813	1	0	-0.432935	-0.438128	0.00213266	0.00617492	No	No	Yes	1.65441	3.90785
O15027	SEC16A	10	sp|O15027|SC16A_HUMAN Protein transport protein Sec16A OS=Homo sapiens OX=9606 GN=SEC16A PE=1 SV=4	20.3975	19.3956	3	0	1.00192	1.01394	0.0682418	0.128006	No	No	Yes	1.2711	3.40674
O15042	U2SURP	40	sp|O15042|SR140_HUMAN U2 snRNP-associated SURP motif-containing protein OS=Homo sapiens OX=9606 GN=U2SURP PE=1 SV=2	25.1523	25.4843	4	4	-0.332019	-0.336001	0.188525	0.282556	No	No	Yes	2.31409	3.18502
O15078	CEP290	50	sp|O15078|CE290_HUMAN Centrosomal protein of 290 kDa OS=Homo sapiens OX=9606 GN=CEP290 PE=1 SV=2	22.4463	24.7101	4	4	-2.26379	-2.29095	0.00438284	0.0120413	Yes	Yes	Yes	1.82684	2.99136
O15143	ARPC1B	8	sp|O15143|ARC1B_HUMAN Actin-related protein 2/3 complex subunit 1B OS=Homo sapiens OX=9606 GN=ARPC1B PE=1 SV=3	21.5813	21.4401	3	3	0.141247	0.142941	0.904185	0.933302	No	No	Yes	1.69517	3.33999
O15145	ARPC3	6	sp|O15145|ARPC3_HUMAN Actin-related protein 2/3 complex subunit 3 OS=Homo sapiens OX=9606 GN=ARPC3 PE=1 SV=3	21.4757	19.3815	4	0	2.09422	2.11934	9.55733e-09	1.81888e-07	Yes	Yes	Yes	1.7522	3.17909
O15231	ZNF185	21	sp|O15231|ZN185_HUMAN Zinc finger protein 185 OS=Homo sapiens OX=9606 GN=ZNF185 PE=1 SV=3	22.3614	23.2687	2	1	-0.907282	-0.918165	0.000720558	0.00225421	No	No	Yes	1.46444	2.90946
O15254	ACOX3	6	sp|O15254|ACOX3_HUMAN Peroxisomal acyl-coenzyme A oxidase 3 OS=Homo sapiens OX=9606 GN=ACOX3 PE=1 SV=2	21.374	19.4463	1	0	1.92771	1.95083	2.52475e-06	1.42316e-05	No	No	Yes	0.91836	3.66115
O15260	SURF4	5	sp|O15260|SURF4_HUMAN Surfeit locus protein 4 OS=Homo sapiens OX=9606 GN=SURF4 PE=1 SV=3	22.4516	19.3967	2	0	3.05493	3.09158	2.36782e-05	9.78735e-05	Yes	Yes	Yes	2.23722	3.93559
O15294	OGT	10	sp|O15294|OGT1_HUMAN UDP-N-acetylglucosamine--peptide N-acetylglucosaminyltransferase 110 kDa subunit OS=Homo sapiens OX=9606 GN=OGT PE=1 SV=3	21.0895	21.0586	2	1	0.0309427	0.0313139	0.5468	0.634181	No	No	Yes	1.63418	3.43719
O15355	PPM1G	20	sp|O15355|PPM1G_HUMAN Protein phosphatase 1G OS=Homo sapiens OX=9606 GN=PPM1G PE=1 SV=1	22.978	22.2517	4	2	0.72637	0.735083	0.0418628	0.089664	No	No	Yes	2.32218	3.16464
O15357	INPPL1	8	sp|O15357|SHIP2_HUMAN Phosphatidylinositol 3,4,5-trisphosphate 5-phosphatase 2 OS=Homo sapiens OX=9606 GN=INPPL1 PE=1 SV=2	22.037	19.3601	2	0	2.67692	2.70903	1.90286e-06	1.12874e-05	Yes	Yes	Yes	1.56665	3.60748
O15371	EIF3D	24	sp|O15371|EIF3D_HUMAN Eukaryotic translation initiation factor 3 subunit D OS=Homo sapiens OX=9606 GN=EIF3D PE=1 SV=1	22.9315	22.2394	4	3	0.692151	0.700453	0.524199	0.616288	No	No	Yes	2.11283	2.66977
O15372	EIF3H	14	sp|O15372|EIF3H_HUMAN Eukaryotic translation initiation factor 3 subunit H OS=Homo sapiens OX=9606 GN=EIF3H PE=1 SV=1	23.0211	22.482	4	1	0.539107	0.545574	0.00167362	0.00492384	No	No	Yes	2.16874	3.23138
O15397	IPO8	14	sp|O15397|IPO8_HUMAN Importin-8 OS=Homo sapiens OX=9606 GN=IPO8 PE=1 SV=2	22.8226	21.4371	4	1	1.38552	1.40214	0.0102109	0.0258155	Yes	Yes	Yes	1.97332	3.92135
O15479	MAGEB2	6	sp|O15479|MAGB2_HUMAN Melanoma-associated antigen B2 OS=Homo sapiens OX=9606 GN=MAGEB2 PE=1 SV=3	21.5724	22.5069	3	2	-0.934496	-0.945705	0.311665	0.416236	No	No	Yes	1.81348	3.17721
O15498	YKT6	4	sp|O15498|YKT6_HUMAN Synaptobrevin homolog YKT6 OS=Homo sapiens OX=9606 GN=YKT6 PE=1 SV=1	21.8979	21.6606	4	2	0.237281	0.240128	0.0809865	0.144514	No	No	Yes	1.81594	3.12089
O15511	ARPC5	4	sp|O15511|ARPC5_HUMAN Actin-related protein 2/3 complex subunit 5 OS=Homo sapiens OX=9606 GN=ARPC5 PE=1 SV=3	20.5876	19.4508	1	0	1.13684	1.15048	8.23712e-07	5.59451e-06	No	No	Yes	1.92672	1.98883
O43143	DHX15	40	sp|O43143|DHX15_HUMAN Pre-mRNA-splicing factor ATP-dependent RNA helicase DHX15 OS=Homo sapiens OX=9606 GN=DHX15 PE=1 SV=2	24.8207	24.6327	4	4	0.187975	0.19023	0.213395	0.310114	No	No	Yes	1.6534	3.61435
O43148	RNMT	14	sp|O43148|MCES_HUMAN mRNA cap guanine-N7 methyltransferase OS=Homo sapiens OX=9606 GN=RNMT PE=1 SV=1	23.9782	23.123	4	4	0.855263	0.865523	0.0146626	0.036051	No	No	Yes	2.28791	2.92149
O43175	PHGDH	35	sp|O43175|SERA_HUMAN D-3-phosphoglycerate dehydrogenase OS=Homo sapiens OX=9606 GN=PHGDH PE=1 SV=4	27.0828	26.9504	4	4	0.132388	0.133977	0.416121	0.518944	No	No	Yes	1.95948	3.07683
O43252	PAPSS1	9	sp|O43252|PAPS1_HUMAN Bifunctional 3-phosphoadenosine 5-phosphosulfate synthase 1 OS=Homo sapiens OX=9606 GN=PAPSS1 PE=1 SV=2	22.5307	19.4214	2	0	3.10929	3.14659	6.32681e-06	3.06631e-05	Yes	Yes	Yes	2.00148	3.33498
O43264	ZW10	17	sp|O43264|ZW10_HUMAN Centromere/kinetochore protein zw10 homolog OS=Homo sapiens OX=9606 GN=ZW10 PE=1 SV=3	21.6464	20.2052	3	2	1.44118	1.45847	0.253331	0.356302	No	No	Yes	1.57655	3.38343
O43290	SART1	26	sp|O43290|SNUT1_HUMAN U4/U6.U5 tri-snRNP-associated protein 1 OS=Homo sapiens OX=9606 GN=SART1 PE=1 SV=1	22.4202	19.4224	1	0	2.99779	3.03375	8.68271e-07	5.85362e-06	No	No	Yes	1.24115	2.9737
O43294	TGFB1I1	2	sp|O43294|TGFI1_HUMAN Transforming growth factor beta-1-induced transcript 1 protein OS=Homo sapiens OX=9606 GN=TGFB1I1 PE=1 SV=2	18.6703	19.3575	1	0	-0.68722	-0.695463	4.1811e-06	2.15787e-05	No	No	Yes	1.10152	2.51766
O43303	CCP110	12	sp|O43303|CP110_HUMAN Centriolar coiled-coil protein of 110 kDa OS=Homo sapiens OX=9606 GN=CCP110 PE=1 SV=3	22.0104	21.7644	1	3	0.246047	0.248998	0.781888	0.836364	No	No	Yes	1.84675	2.84097
O43390	HNRNPR	36	sp|O43390|HNRPR_HUMAN Heterogeneous nuclear ribonucleoprotein R OS=Homo sapiens OX=9606 GN=HNRNPR PE=1 SV=1	25.8849	25.5168	4	4	0.368162	0.372578	0.451672	0.553086	No	No	Yes	2.53572	3.04071
O43491	EPB41L2	43	sp|O43491|E41L2_HUMAN Band 4.1-like protein 2 OS=Homo sapiens OX=9606 GN=EPB41L2 PE=1 SV=1	21.8573	22.2997	3	1	-0.442386	-0.447692	0.638574	0.718395	No	No	Yes	2.34324	3.2984
O43548	TGM5	3	sp|O43548|TGM5_HUMAN Protein-glutamine gamma-glutamyltransferase 5 OS=Homo sapiens OX=9606 GN=TGM5 PE=1 SV=4	18.1797	22.0633	0	1	-3.88359	-3.93018	2.52471e-08	3.66998e-07	No	No	No		3.72936
O43592	XPOT	4	sp|O43592|XPOT_HUMAN Exportin-T OS=Homo sapiens OX=9606 GN=XPOT PE=1 SV=2	20.4748	19.4385	1	0	1.03634	1.04877	0.000358797	0.00118754	No	No	Yes	1.26379	3.90085
O43615	TIMM44	25	sp|O43615|TIM44_HUMAN Mitochondrial import inner membrane translocase subunit TIM44 OS=Homo sapiens OX=9606 GN=TIMM44 PE=1 SV=2	21.1582	22.8198	3	1	-1.6616	-1.68153	0.120856	0.198743	No	No	Yes	1.30481	3.35227
O43663	PRC1	14	sp|O43663|PRC1_HUMAN Protein regulator of cytokinesis 1 OS=Homo sapiens OX=9606 GN=PRC1 PE=1 SV=2	22.7481	22.8912	4	4	-0.143121	-0.144838	0.366846	0.472323	No	No	Yes	2.20664	2.53975
O43681	ASNA1	9	sp|O43681|GET3_HUMAN ATPase GET3 OS=Homo sapiens OX=9606 GN=GET3 PE=1 SV=2	22.9908	22.0115	4	3	0.979377	0.991125	0.345145	0.449451	No	No	No		3.22284
O43684	BUB3	14	sp|O43684|BUB3_HUMAN Mitotic checkpoint protein BUB3 OS=Homo sapiens OX=9606 GN=BUB3 PE=1 SV=1	24.0989	22.6608	4	3	1.43812	1.45537	0.281292	0.385537	No	No	Yes	2.10147	2.76958
O43707	ACTN4	51	sp|O43707|ACTN4_HUMAN Alpha-actinin-4 OS=Homo sapiens OX=9606 GN=ACTN4 PE=1 SV=2	26.1658	25.1555	4	4	1.01036	1.02247	0.159395	0.247842	No	No	Yes	2.36801	3.50468
O43719	HTATSF1	15	sp|O43719|HTSF1_HUMAN HIV Tat-specific factor 1 OS=Homo sapiens OX=9606 GN=HTATSF1 PE=1 SV=1	18.2276	20.359	0	1	-2.13142	-2.15698	2.27403e-05	9.48551e-05	No	No	Yes	1.85518	2.06948
O43747	AP1G1	14	sp|O43747|AP1G1_HUMAN AP-1 complex subunit gamma-1 OS=Homo sapiens OX=9606 GN=AP1G1 PE=1 SV=5	22.5615	19.3826	4	0	3.17888	3.21701	0.000106558	0.000385507	Yes	Yes	Yes	1.66895	3.5268
O43776	NARS	15	sp|O43776|SYNC_HUMAN Asparagine--tRNA ligase, cytoplasmic OS=Homo sapiens OX=9606 GN=NARS1 PE=1 SV=1	22.2149	22.3279	2	1	-0.112967	-0.114322	0.185351	0.278714	No	No	No		3.27554
O43795	MYO1B	25	sp|O43795|MYO1B_HUMAN Unconventional myosin-Ib OS=Homo sapiens OX=9606 GN=MYO1B PE=1 SV=3	24.1185	22.5666	4	3	1.55189	1.57051	0.232126	0.332102	No	No	Yes	1.81053	3.85101
O43837	IDH3B	20	sp|O43837|IDH3B_HUMAN Isocitrate dehydrogenase [NAD] subunit beta, mitochondrial OS=Homo sapiens OX=9606 GN=IDH3B PE=1 SV=2	23.3521	21.6376	4	3	1.71448	1.73505	0.190689	0.285564	No	No	Yes	1.19375	2.1994
O43854	EDIL3	19	sp|O43854|EDIL3_HUMAN EGF-like repeat and discoidin I-like domain-containing protein 3 OS=Homo sapiens OX=9606 GN=EDIL3 PE=1 SV=1	24.817	25.1024	4	4	-0.285448	-0.288872	0.292823	0.396581	No	No	Yes	2.71598	3.08908
O43865	AHCYL1	14	sp|O43865|SAHH2_HUMAN S-adenosylhomocysteine hydrolase-like protein 1 OS=Homo sapiens OX=9606 GN=AHCYL1 PE=1 SV=2;sp|Q96HN2|SAHH3_HUMAN Adenosylhomocysteinase 3 OS=Homo sapiens OX=9606 GN=AHCYL2 PE=1 SV=1	24.2408	23.7996	4	4	0.441188	0.44648	0.252646	0.355612	No	No	Yes	2.39685	3.50795
O43913	ORC5	3	sp|O43913|ORC5_HUMAN Origin recognition complex subunit 5 OS=Homo sapiens OX=9606 GN=ORC5 PE=1 SV=1	20.6839	19.3714	1	0	1.31246	1.32821	2.56249e-07	2.10886e-06	No	No	Yes	1.34578	3.79367
O60216	RAD21	12	sp|O60216|RAD21_HUMAN Double-strand-break repair protein rad21 homolog OS=Homo sapiens OX=9606 GN=RAD21 PE=1 SV=2	21.0318	19.4056	1	0	1.62619	1.6457	3.26464e-08	4.29101e-07	No	No	Yes	2.88063	2.92367
O60231	DHX16	6	sp|O60231|DHX16_HUMAN Pre-mRNA-splicing factor ATP-dependent RNA helicase DHX16 OS=Homo sapiens OX=9606 GN=DHX16 PE=1 SV=2	21.2328	19.3828	2	0	1.85007	1.87226	2.2558e-08	3.47124e-07	Yes	Yes	Yes	1.30878	3.68224
O60264	SMARCA5	34	sp|O60264|SMCA5_HUMAN SWI/SNF-related matrix-associated actin-dependent regulator of chromatin subfamily A member 5 OS=Homo sapiens OX=9606 GN=SMARCA5 PE=1 SV=1	24.2475	23.0097	4	4	1.23782	1.25267	0.0743433	0.135398	No	No	Yes	2.19988	3.441
O60271	SPAG9	12	sp|O60271|JIP4_HUMAN C-Jun-amino-terminal kinase-interacting protein 4 OS=Homo sapiens OX=9606 GN=SPAG9 PE=1 SV=4	18.5321	19.3718	1	0	-0.839651	-0.849723	9.19667e-07	6.13224e-06	No	No	Yes	2.20155	3.63493
O60443	DFNA5	5	sp|O60443|GSDME_HUMAN Gasdermin-E OS=Homo sapiens OX=9606 GN=GSDME PE=1 SV=2	21.7935	19.4337	2	0	2.3598	2.3881	2.22232e-07	1.85396e-06	Yes	Yes	No		3.59807
O60493	SNX3	5	sp|O60493|SNX3_HUMAN Sorting nexin-3 OS=Homo sapiens OX=9606 GN=SNX3 PE=1 SV=3	21.3575	21.6927	3	2	-0.335227	-0.339248	0.651356	0.730526	No	No	Yes	1.84304	0.657056
O60502	MGEA5	9	sp|O60502|OGA_HUMAN Protein O-GlcNAcase OS=Homo sapiens OX=9606 GN=OGA PE=1 SV=2	19.7106	19.401	1	0	0.309566	0.31328	0.000710006	0.00222883	No	No	Yes	1.96427	3.33126
O60506	SYNCRIP	33	sp|O60506|HNRPQ_HUMAN Heterogeneous nuclear ribonucleoprotein Q OS=Homo sapiens OX=9606 GN=SYNCRIP PE=1 SV=2	23.7562	21.9205	4	3	1.83573	1.85775	0.133272	0.214905	No	No	Yes	2.26235	2.99872
O60524	NEMF	4	sp|O60524|NEMF_HUMAN Nuclear export mediator factor NEMF OS=Homo sapiens OX=9606 GN=NEMF PE=1 SV=4	20.0375	19.3761	1	0	0.661406	0.66934	1.16763e-05	5.21578e-05	No	No	Yes	2.0886	3.5764
O60610	DIAPH1	35	sp|O60610|DIAP1_HUMAN Protein diaphanous homolog 1 OS=Homo sapiens OX=9606 GN=DIAPH1 PE=1 SV=2	24.7488	23.8337	4	2	0.915143	0.926121	0.00689889	0.0181357	No	No	Yes	2.23184	3.4058
O60664	PLIN3	20	sp|O60664|PLIN3_HUMAN Perilipin-3 OS=Homo sapiens OX=9606 GN=PLIN3 PE=1 SV=3	23.6229	23.2169	4	2	0.406084	0.410956	0.0931857	0.161835	No	No	Yes	2.03919	2.54048
O60684	KPNA6	10	sp|O60684|IMA7_HUMAN Importin subunit alpha-7 OS=Homo sapiens OX=9606 GN=KPNA6 PE=1 SV=1	22.5852	21.6853	4	1	0.899814	0.910607	0.0352858	0.0772063	No	No	No		2.78415
O60701	UGDH	19	sp|O60701|UGDH_HUMAN UDP-glucose 6-dehydrogenase OS=Homo sapiens OX=9606 GN=UGDH PE=1 SV=1	23.5644	23.819	4	4	-0.254624	-0.257678	0.706898	0.779966	No	No	Yes	1.70282	3.22297
O60716	CTNND1	41	sp|O60716|CTND1_HUMAN Catenin delta-1 OS=Homo sapiens OX=9606 GN=CTNND1 PE=1 SV=1	23.725	21.665	4	4	2.05999	2.08471	0.00400575	0.0111393	Yes	Yes	Yes	1.89734	3.43935
O60739	EIF1B	1	sp|O60739|EIF1B_HUMAN Eukaryotic translation initiation factor 1b OS=Homo sapiens OX=9606 GN=EIF1B PE=1 SV=2	22.1075	19.4028	1	0	2.7047	2.73715	1.20534e-07	1.14695e-06	No	No	Yes	1.54595	1.97488
O60749	SNX2	14	sp|O60749|SNX2_HUMAN Sorting nexin-2 OS=Homo sapiens OX=9606 GN=SNX2 PE=1 SV=2	22.2884	19.4084	1	0	2.88	2.91455	6.75241e-08	7.46854e-07	No	No	Yes	1.76871	2.59579
O60763	USO1	26	sp|O60763|USO1_HUMAN General vesicular transport factor p115 OS=Homo sapiens OX=9606 GN=USO1 PE=1 SV=2	24.4136	22.4345	4	3	1.97914	2.00288	0.153016	0.240327	No	No	Yes	1.91249	3.74469
O60784	TOM1	5	sp|O60784|TOM1_HUMAN Target of Myb protein 1 OS=Homo sapiens OX=9606 GN=TOM1 PE=1 SV=2	20.7851	19.4062	2	0	1.37893	1.39547	0.00148017	0.00439719	Yes	Yes	Yes	1.04501	3.01436
O60811	PRAMEF2	5	sp|O60811|PRAM2_HUMAN PRAME family member 2 OS=Homo sapiens OX=9606 GN=PRAMEF2 PE=2 SV=2;sp|Q5VWM6|PRA13_HUMAN Putative PRAME family member 13 OS=Homo sapiens OX=9606 GN=PRAMEF13 PE=5 SV=2;sp|O95521|PRAM1_HUMAN PRAME family member 1 OS=Homo sapiens OX=9606	21.6367	19.3893	3	0	2.24741	2.27437	0.0596122	0.11942	No	No	No		3.43403
O60832	DKC1	26	sp|O60832|DKC1_HUMAN H/ACA ribonucleoprotein complex subunit DKC1 OS=Homo sapiens OX=9606 GN=DKC1 PE=1 SV=3	22.5315	23.0824	4	2	-0.550857	-0.557465	0.409994	0.513405	No	No	Yes	2.11744	3.53077
O60841	EIF5B	45	sp|O60841|IF2P_HUMAN Eukaryotic translation initiation factor 5B OS=Homo sapiens OX=9606 GN=EIF5B PE=1 SV=4	26.223	25.5977	4	4	0.625215	0.632714	0.0324732	0.0723	No	No	Yes	2.6782	3.55413
O60884	DNAJA2	19	sp|O60884|DNJA2_HUMAN DnaJ homolog subfamily A member 2 OS=Homo sapiens OX=9606 GN=DNAJA2 PE=1 SV=1	22.158	21.9844	4	1	0.173539	0.175621	0.279568	0.384038	No	No	No		2.74364
O60885	BRD4	4	sp|O60885|BRD4_HUMAN Bromodomain-containing protein 4 OS=Homo sapiens OX=9606 GN=BRD4 PE=1 SV=2	25.7409	19.422	1	0	6.31889	6.39469	8.48401e-10	4.30563e-08	No	No	Yes	2.18241	2.57322
O75044	SRGAP2	4	sp|O75044|SRGP2_HUMAN SLIT-ROBO Rho GTPase-activating protein 2 OS=Homo sapiens OX=9606 GN=SRGAP2 PE=1 SV=3;sp|P0DMP2|SRG2B_HUMAN SLIT-ROBO Rho GTPase-activating protein 2B OS=Homo sapiens OX=9606 GN=SRGAP2B PE=3 SV=1;sp|P0DJJ0|SRG2C_HUMAN SLIT-ROBO Rho GT	21.387	19.3631	1	0	2.0239	2.04817	1.11756e-09	5.1876e-08	No	No	Yes	1.34187	3.07138
O75083	WDR1	23	sp|O75083|WDR1_HUMAN WD repeat-containing protein 1 OS=Homo sapiens OX=9606 GN=WDR1 PE=1 SV=4	21.2775	22.6891	3	1	-1.41165	-1.42859	0.162145	0.250837	No	No	Yes	1.65659	3.58886
O75122	CLASP2	16	sp|O75122|CLAP2_HUMAN CLIP-associating protein 2 OS=Homo sapiens OX=9606 GN=CLASP2 PE=1 SV=3	22.4479	19.4255	4	0	3.0224	3.05865	8.96401e-05	0.000329135	Yes	Yes	Yes	1.64975	3.62369
O75131	CPNE3	18	sp|O75131|CPNE3_HUMAN Copine-3 OS=Homo sapiens OX=9606 GN=CPNE3 PE=1 SV=1	23.5744	22.896	4	4	0.678341	0.686478	0.00953151	0.0242874	No	No	Yes	1.82302	3.62885
O75152	ZC3H11A	17	sp|O75152|ZC11A_HUMAN Zinc finger CCCH domain-containing protein 11A OS=Homo sapiens OX=9606 GN=ZC3H11A PE=1 SV=3	18.2364	22.2523	0	1	-4.01584	-4.06401	1.62514e-07	1.45478e-06	No	No	Yes	2.01591	2.95161
O75153	CLUH	9	sp|O75153|CLU_HUMAN Clustered mitochondria protein homolog OS=Homo sapiens OX=9606 GN=CLUH PE=1 SV=2	22.4371	19.4222	2	0	3.01486	3.05102	1.25646e-06	7.99845e-06	Yes	Yes	Yes	1.23797	3.6577
O75251	NDUFS7	6	sp|O75251|NDUS7_HUMAN NADH dehydrogenase [ubiquinone] iron-sulfur protein 7, mitochondrial OS=Homo sapiens OX=9606 GN=NDUFS7 PE=1 SV=3	21.5483	19.3988	2	0	2.14953	2.17532	1.5184e-05	6.51201e-05	Yes	Yes	Yes	1.12327	3.04604
O75323	GBAS	6	sp|O75323|NIPS2_HUMAN Protein NipSnap homolog 2 OS=Homo sapiens OX=9606 GN=NIPSNAP2 PE=1 SV=1	18.1893	22.5571	0	1	-4.36785	-4.42024	1.82711e-07	1.61263e-06	No	No	No		2.01999
O75330	HMMR	5	sp|O75330|HMMR_HUMAN Hyaluronan mediated motility receptor OS=Homo sapiens OX=9606 GN=HMMR PE=1 SV=2	21.0774	19.4105	1	0	1.66689	1.68688	0.000181374	0.000626411	No	No	Yes	2.13421	2.81597
O75339	CILP	6	sp|O75339|CILP1_HUMAN Cartilage intermediate layer protein 1 OS=Homo sapiens OX=9606 GN=CILP PE=1 SV=4	23.1203	19.46	1	0	3.66038	3.70428	2.90977e-10	2.77821e-08	No	No	No		3.59351
O75342	ALOX12B	11	sp|O75342|LX12B_HUMAN Arachidonate 12-lipoxygenase, 12R-type OS=Homo sapiens OX=9606 GN=ALOX12B PE=1 SV=1	22.2681	22.9691	2	2	-0.701008	-0.709416	0.0109659	0.0275201	No	No	No		3.45791
O75351	VPS4B	3	sp|O75351|VPS4B_HUMAN Vacuolar protein sorting-associated protein 4B OS=Homo sapiens OX=9606 GN=VPS4B PE=1 SV=2	18.279	21.2731	0	1	-2.99407	-3.02999	5.4792e-06	2.72024e-05	No	No	Yes	1.60833	3.074
O75367	H2AFY	22	sp|O75367|H2AY_HUMAN Core histone macro-H2A.1 OS=Homo sapiens OX=9606 GN=MACROH2A1 PE=1 SV=4	22.24	25.1277	3	2	-2.88765	-2.92229	0.146191	0.232051	No	No	Yes	2.21326	3.22564
O75369	FLNB	113	sp|O75369|FLNB_HUMAN Filamin-B OS=Homo sapiens OX=9606 GN=FLNB PE=1 SV=2	26.3977	23.7797	4	2	2.61801	2.64942	9.97003e-06	4.56522e-05	Yes	Yes	Yes	1.81917	3.92708
O75390	CS	25	sp|O75390|CISY_HUMAN Citrate synthase, mitochondrial OS=Homo sapiens OX=9606 GN=CS PE=1 SV=2	25.9309	25.4333	4	4	0.497658	0.503628	0.0995398	0.170121	No	No	Yes	1.72521	3.43159
O75396	SEC22B	14	sp|O75396|SC22B_HUMAN Vesicle-trafficking protein SEC22b OS=Homo sapiens OX=9606 GN=SEC22B PE=1 SV=4	22.7031	19.3778	2	0	3.32531	3.3652	7.56555e-06	3.60895e-05	Yes	Yes	Yes	1.408	3.36136
O75400	PRPF40A	29	sp|O75400|PR40A_HUMAN Pre-mRNA-processing factor 40 homolog A OS=Homo sapiens OX=9606 GN=PRPF40A PE=1 SV=2	25.9529	26.0974	4	4	-0.144559	-0.146293	0.453891	0.554688	No	No	Yes	2.62143	3.32802
O75436	VPS26A	6	sp|O75436|VP26A_HUMAN Vacuolar protein sorting-associated protein 26A OS=Homo sapiens OX=9606 GN=VPS26A PE=1 SV=2	18.1952	22.5808	0	1	-4.38566	-4.43827	1.30376e-06	8.2707e-06	No	No	Yes	1.71805	3.23933
O75439	PMPCB	17	sp|O75439|MPPB_HUMAN Mitochondrial-processing peptidase subunit beta OS=Homo sapiens OX=9606 GN=PMPCB PE=1 SV=2	22.6821	23.256	4	1	-0.573969	-0.580854	0.170233	0.259613	No	No	Yes	1.64499	3.09697
O75475	PSIP1	25	sp|O75475|PSIP1_HUMAN PC4 and SFRS1-interacting protein OS=Homo sapiens OX=9606 GN=PSIP1 PE=1 SV=1	20.6679	19.3815	1	0	1.28642	1.30185	8.98382e-06	4.1871e-05	No	No	Yes	2.2387	2.86584
O75494	SRSF10	11	sp|O75494|SRS10_HUMAN Serine/arginine-rich splicing factor 10 OS=Homo sapiens OX=9606 GN=SRSF10 PE=1 SV=1	24.1436	24.7246	4	4	-0.580951	-0.58792	0.374058	0.479918	No	No	Yes	2.1954	2.09663
O75521	ECI2	16	sp|O75521|ECI2_HUMAN Enoyl-CoA delta isomerase 2 OS=Homo sapiens OX=9606 GN=ECI2 PE=1 SV=4	21.4943	19.4201	3	0	2.07421	2.09909	0.0825828	0.146632	No	No	Yes	1.46903	3.30219
O75533	SF3B1	71	sp|O75533|SF3B1_HUMAN Splicing factor 3B subunit 1 OS=Homo sapiens OX=9606 GN=SF3B1 PE=1 SV=3	23.086	21.9327	4	4	1.15337	1.16721	0.0125615	0.0312884	Yes	Yes	Yes	2.18437	3.74126
O75534	CSDE1	32	sp|O75534|CSDE1_HUMAN Cold shock domain-containing protein E1 OS=Homo sapiens OX=9606 GN=CSDE1 PE=1 SV=2	25.1606	24.9868	4	4	0.17384	0.175925	0.513776	0.607945	No	No	Yes	2.84234	3.24895
O75556	SCGB2A1	2	sp|O75556|SG2A1_HUMAN Mammaglobin-B OS=Homo sapiens OX=9606 GN=SCGB2A1 PE=1 SV=1	18.1735	22.5619	0	1	-4.38845	-4.44109	2.03909e-08	3.29683e-07	No	No	No		3.08567
O75569	PRKRA	8	sp|O75569|PRKRA_HUMAN Interferon-inducible double-stranded RNA-dependent protein kinase activator A OS=Homo sapiens OX=9606 GN=PRKRA PE=1 SV=1	21.5158	22.2688	3	2	-0.753015	-0.762048	0.435956	0.537675	No	No	Yes	1.4526	1.96118
O75607	NPM3	4	sp|O75607|NPM3_HUMAN Nucleoplasmin-3 OS=Homo sapiens OX=9606 GN=NPM3 PE=1 SV=3	21.64	19.4082	1	0	2.23182	2.25859	8.26825e-10	4.30563e-08	No	No	Yes	1.58325	2.90876
O75616	ERAL1	15	sp|O75616|ERAL1_HUMAN GTPase Era, mitochondrial OS=Homo sapiens OX=9606 GN=ERAL1 PE=1 SV=2	21.7638	22.3337	2	2	-0.569914	-0.57675	0.0146703	0.036051	No	No	Yes	0.992442	3.07912
O75643	SNRNP200	110	sp|O75643|U520_HUMAN U5 small nuclear ribonucleoprotein 200 kDa helicase OS=Homo sapiens OX=9606 GN=SNRNP200 PE=1 SV=2	25.1567	23.7199	4	4	1.43678	1.45401	0.0478054	0.100161	No	No	Yes	2.2837	4.11775
O75663	TIPRL	9	sp|O75663|TIPRL_HUMAN TIP41-like protein OS=Homo sapiens OX=9606 GN=TIPRL PE=1 SV=2	21.5574	19.4679	2	0	2.08949	2.11455	9.52006e-05	0.000347863	Yes	Yes	Yes	1.91713	2.67458
O75665	OFD1	34	sp|O75665|OFD1_HUMAN Oral-facial-digital syndrome 1 protein OS=Homo sapiens OX=9606 GN=OFD1 PE=1 SV=1	23.9013	25.2801	4	4	-1.37886	-1.3954	0.00277308	0.00791628	Yes	Yes	Yes	1.51569	2.1119
O75694	NUP155	38	sp|O75694|NU155_HUMAN Nuclear pore complex protein Nup155 OS=Homo sapiens OX=9606 GN=NUP155 PE=1 SV=1	24.6806	21.4184	4	3	3.26217	3.3013	0.0253573	0.0587172	No	No	Yes	1.94717	3.85681
O75794	CDC123	2	sp|O75794|CD123_HUMAN Cell division cycle protein 123 homolog OS=Homo sapiens OX=9606 GN=CDC123 PE=1 SV=1	20.2904	19.3869	1	0	0.903447	0.914284	7.04652e-07	4.89505e-06	No	No	Yes	1.3509	2.94996
O75874	IDH1	15	sp|O75874|IDHC_HUMAN Isocitrate dehydrogenase [NADP] cytoplasmic OS=Homo sapiens OX=9606 GN=IDH1 PE=1 SV=2	20.8242	20.6712	1	2	0.152979	0.154814	0.169781	0.25914	No	No	Yes	1.81343	3.03315
O76021	RSL1D1	37	sp|O76021|RL1D1_HUMAN Ribosomal L1 domain-containing protein 1 OS=Homo sapiens OX=9606 GN=RSL1D1 PE=1 SV=3	24.2797	23.7302	4	4	0.549483	0.556074	0.351201	0.454745	No	No	Yes	2.17074	3.13179
O76031	CLPX	19	sp|O76031|CLPX_HUMAN ATP-dependent Clp protease ATP-binding subunit clpX-like, mitochondrial OS=Homo sapiens OX=9606 GN=CLPX PE=1 SV=2	22.2999	24.1165	2	1	-1.81659	-1.83838	1.77862e-05	7.55706e-05	No	No	Yes	1.77197	3.21575
O76094	SRP72	30	sp|O76094|SRP72_HUMAN Signal recognition particle subunit SRP72 OS=Homo sapiens OX=9606 GN=SRP72 PE=1 SV=3	25.5378	23.6294	4	3	1.90843	1.93132	0.285913	0.389243	No	No	Yes	2.56513	3.32521
O94776	MTA2	26	sp|O94776|MTA2_HUMAN Metastasis-associated protein MTA2 OS=Homo sapiens OX=9606 GN=MTA2 PE=1 SV=1	22.7548	21.9261	4	1	0.828678	0.838618	0.0805152	0.144002	No	No	Yes	1.64754	3.48592
O94822	LTN1	8	sp|O94822|LTN1_HUMAN E3 ubiquitin-protein ligase listerin OS=Homo sapiens OX=9606 GN=LTN1 PE=1 SV=6	21.0735	21.7511	3	2	-0.677644	-0.685773	0.419365	0.521921	No	No	Yes	2.1407	4.04963
O94826	TOMM70A	34	sp|O94826|TOM70_HUMAN Mitochondrial import receptor subunit TOM70 OS=Homo sapiens OX=9606 GN=TOMM70 PE=1 SV=1	21.3623	19.3707	1	0	1.99154	2.01543	2.29896e-08	3.47124e-07	No	No	No		3.18697
O94855	SEC24D	2	sp|O94855|SC24D_HUMAN Protein transport protein Sec24D OS=Homo sapiens OX=9606 GN=SEC24D PE=1 SV=2	19.7033	19.4137	1	0	0.289592	0.293066	0.00737756	0.019228	No	No	Yes	1.42393	3.51835
O94888	UBXN7	4	sp|O94888|UBXN7_HUMAN UBX domain-containing protein 7 OS=Homo sapiens OX=9606 GN=UBXN7 PE=1 SV=2	17.9992	19.3951	1	0	-1.39599	-1.41274	2.18262e-05	9.12504e-05	No	No	Yes	1.8514	2.98114
O94901	SUN1	17	sp|O94901|SUN1_HUMAN SUN domain-containing protein 1 OS=Homo sapiens OX=9606 GN=SUN1 PE=1 SV=3	22.5777	21.449	4	2	1.12863	1.14217	0.000815616	0.00253423	Yes	Yes	Yes	1.80868	3.70108
O94906	PRPF6	34	sp|O94906|PRP6_HUMAN Pre-mRNA-processing factor 6 OS=Homo sapiens OX=9606 GN=PRPF6 PE=1 SV=1	24.2451	24.5359	4	4	-0.290896	-0.294385	0.155455	0.243289	No	No	Yes	1.81011	3.53033
O94925	GLS	30	sp|O94925|GLSK_HUMAN Glutaminase kidney isoform, mitochondrial OS=Homo sapiens OX=9606 GN=GLS PE=1 SV=1	25.9436	26.6808	4	4	-0.737189	-0.746032	0.0325686	0.0723	No	No	Yes	2.36549	3.57891
O94927	HAUS5	2	sp|O94927|HAUS5_HUMAN HAUS augmin-like complex subunit 5 OS=Homo sapiens OX=9606 GN=HAUS5 PE=1 SV=2	20.688	21.2257	3	1	-0.537714	-0.544164	0.328579	0.432191	No	No	Yes	1.10131	3.21327
O94973	AP2A2	16	sp|O94973|AP2A2_HUMAN AP-2 complex subunit alpha-2 OS=Homo sapiens OX=9606 GN=AP2A2 PE=1 SV=2	21.0363	19.4216	1	0	1.61473	1.6341	2.35919e-06	1.3597e-05	No	No	Yes	1.09385	3.77768
O94979	SEC31A	29	sp|O94979|SC31A_HUMAN Protein transport protein Sec31A OS=Homo sapiens OX=9606 GN=SEC31A PE=1 SV=3	25.4718	22.8778	4	3	2.59394	2.62506	0.111479	0.186513	No	No	Yes	2.22715	3.58728
O94986	CEP152	86	sp|O94986|CE152_HUMAN Centrosomal protein of 152 kDa OS=Homo sapiens OX=9606 GN=CEP152 PE=1 SV=4	27.2588	27.8535	4	4	-0.594763	-0.601898	0.00412814	0.0114448	No	No	Yes	1.74627	3.24025
O95155	UBE4B	8	sp|O95155|UBE4B_HUMAN Ubiquitin conjugation factor E4 B OS=Homo sapiens OX=9606 GN=UBE4B PE=1 SV=1	22.1117	19.4402	2	0	2.67156	2.7036	1.16678e-09	5.1876e-08	Yes	Yes	Yes	1.9297	3.83934
O95218	ZRANB2	7	sp|O95218|ZRAB2_HUMAN Zinc finger Ran-binding domain-containing protein 2 OS=Homo sapiens OX=9606 GN=ZRANB2 PE=1 SV=2	22.9216	22.0218	2	3	0.899859	0.910654	0.3875	0.491688	No	No	Yes	2.19056	-0.251812
O95219	SNX4	2	sp|O95219|SNX4_HUMAN Sorting nexin-4 OS=Homo sapiens OX=9606 GN=SNX4 PE=1 SV=1	20.4771	19.3977	1	0	1.07933	1.09228	5.20476e-07	3.78848e-06	No	No	Yes	1.56529	3.2446
O95232	LUC7L3	17	sp|O95232|LC7L3_HUMAN Luc7-like protein 3 OS=Homo sapiens OX=9606 GN=LUC7L3 PE=1 SV=2	24.3616	24.9872	4	4	-0.625651	-0.633156	0.0326445	0.0723616	No	No	Yes	2.50029	2.69759
O95235	KIF20A	19	sp|O95235|KI20A_HUMAN Kinesin-like protein KIF20A OS=Homo sapiens OX=9606 GN=KIF20A PE=1 SV=1	22.8601	22.4785	4	1	0.3816	0.386177	0.0555238	0.113852	No	No	Yes	2.14672	3.34899
O95239	KIF4A	38	sp|O95239|KIF4A_HUMAN Chromosome-associated kinesin KIF4A OS=Homo sapiens OX=9606 GN=KIF4A PE=1 SV=3	25.5035	25.3227	4	4	0.18081	0.182979	0.105764	0.178917	No	No	Yes	2.08672	3.38476
O95299	NDUFA10	14	sp|O95299|NDUAA_HUMAN NADH dehydrogenase [ubiquinone] 1 alpha subcomplex subunit 10, mitochondrial OS=Homo sapiens OX=9606 GN=NDUFA10 PE=1 SV=1	21.8776	22.9961	3	1	-1.11848	-1.13189	0.285661	0.389189	No	No	Yes	1.5698	2.71503
O95340	PAPSS2	3	sp|O95340|PAPS2_HUMAN Bifunctional 3-phosphoadenosine 5-phosphosulfate synthase 2 OS=Homo sapiens OX=9606 GN=PAPSS2 PE=1 SV=2	21.7479	19.4268	1	0	2.32108	2.34892	2.91926e-06	1.60165e-05	No	No	Yes	1.37214	3.23487
O95347	SMC2	46	sp|O95347|SMC2_HUMAN Structural maintenance of chromosomes protein 2 OS=Homo sapiens OX=9606 GN=SMC2 PE=1 SV=2	25.7092	24.2251	4	4	1.48413	1.50193	0.0961914	0.166265	No	No	Yes	2.66109	3.66991
O95372	LYPLA2	5	sp|O95372|LYPA2_HUMAN Acyl-protein thioesterase 2 OS=Homo sapiens OX=9606 GN=LYPLA2 PE=1 SV=1	21.4938	19.4754	2	0	2.01835	2.04256	1.41721e-06	8.80696e-06	Yes	Yes	Yes	1.21999	3.03515
O95373	IPO7	33	sp|O95373|IPO7_HUMAN Importin-7 OS=Homo sapiens OX=9606 GN=IPO7 PE=1 SV=1	25.2287	23.4464	4	4	1.7823	1.80367	0.0693838	0.129396	No	No	Yes	2.45606	3.91245
O95394	PGM3	7	sp|O95394|AGM1_HUMAN Phosphoacetylglucosamine mutase OS=Homo sapiens OX=9606 GN=PGM3 PE=1 SV=1	19.2341	19.38	1	0	-0.145866	-0.147615	0.010216	0.0258155	No	No	Yes	1.56736	3.49355
O95433	AHSA1	19	sp|O95433|AHSA1_HUMAN Activator of 90 kDa heat shock protein ATPase homolog 1 OS=Homo sapiens OX=9606 GN=AHSA1 PE=1 SV=1	24.4827	23.1197	4	4	1.36296	1.37931	0.0329891	0.0729673	No	No	Yes	1.94254	3.33593
O95456	PSMG1	2	sp|O95456|PSMG1_HUMAN Proteasome assembly chaperone 1 OS=Homo sapiens OX=9606 GN=PSMG1 PE=1 SV=1	22.3912	19.397	1	0	2.9942	3.03012	6.68033e-08	7.46854e-07	No	No	Yes	1.2783	3.37906
O95470	SGPL1	20	sp|O95470|SGPL1_HUMAN Sphingosine-1-phosphate lyase 1 OS=Homo sapiens OX=9606 GN=SGPL1 PE=1 SV=3	20.5832	20.7307	1	1	-0.147528	-0.149298	0.0993354	0.169931	No	No	Yes	2.29472	3.53037
O95486	SEC24A	3	sp|O95486|SC24A_HUMAN Protein transport protein Sec24A OS=Homo sapiens OX=9606 GN=SEC24A PE=1 SV=2	19.813	19.4136	1	0	0.399383	0.404173	0.00351405	0.00986201	No	No	Yes	1.21871	3.68191
O95487	SEC24B	5	sp|O95487|SC24B_HUMAN Protein transport protein Sec24B OS=Homo sapiens OX=9606 GN=SEC24B PE=1 SV=2	20.0888	19.4183	2	0	0.67058	0.678624	0.00460575	0.0125969	No	No	Yes	1.15421	3.62433
O95522	PRAMEF12	5	sp|O95522|PRA12_HUMAN PRAME family member 12 OS=Homo sapiens OX=9606 GN=PRAMEF12 PE=3 SV=2	20.9409	19.4039	1	0	1.53701	1.55545	1.36564e-05	5.95472e-05	No	No	Yes	-0.403534	3.28421
O95571	ETHE1	10	sp|O95571|ETHE1_HUMAN Persulfide dioxygenase ETHE1, mitochondrial OS=Homo sapiens OX=9606 GN=ETHE1 PE=1 SV=2	22.9346	19.3977	4	0	3.5369	3.57932	0.000549991	0.00177219	Yes	Yes	Yes	1.43643	2.91443
O95573	ACSL3	34	sp|O95573|ACSL3_HUMAN Long-chain-fatty-acid--CoA ligase 3 OS=Homo sapiens OX=9606 GN=ACSL3 PE=1 SV=3	25.1464	24.7991	4	4	0.347317	0.351483	0.468115	0.56827	No	No	Yes	2.84906	3.68237
O95613	PCNT	176	sp|O95613|PCNT_HUMAN Pericentrin OS=Homo sapiens OX=9606 GN=PCNT PE=1 SV=4	26.7489	27.522	4	4	-0.773092	-0.782366	0.00365332	0.0101903	No	No	Yes	2.06691	3.51121
O95747	OXSR1	15	sp|O95747|OXSR1_HUMAN Serine/threonine-protein kinase OSR1 OS=Homo sapiens OX=9606 GN=OXSR1 PE=1 SV=1	23.2739	21.2691	4	3	2.00477	2.02882	0.0457956	0.0966149	No	No	Yes	1.72724	3.43118
O95782	AP2A1	34	sp|O95782|AP2A1_HUMAN AP-2 complex subunit alpha-1 OS=Homo sapiens OX=9606 GN=AP2A1 PE=1 SV=3	25.5937	25.4543	4	4	0.139389	0.141061	0.231265	0.331129	No	No	Yes	1.09019	3.72384
O95801	TTC4	9	sp|O95801|TTC4_HUMAN Tetratricopeptide repeat protein 4 OS=Homo sapiens OX=9606 GN=TTC4 PE=1 SV=3	21.781	19.4089	3	0	2.3721	2.40055	0.0660344	0.125934	No	No	Yes	0.318255	2.9198
O95816	BAG2	13	sp|O95816|BAG2_HUMAN BAG family molecular chaperone regulator 2 OS=Homo sapiens OX=9606 GN=BAG2 PE=1 SV=1	23.1917	19.4037	4	0	3.78801	3.83345	7.54882e-05	0.000281463	Yes	Yes	Yes	1.90342	1.94443
O95817	BAG3	5	sp|O95817|BAG3_HUMAN BAG family molecular chaperone regulator 3 OS=Homo sapiens OX=9606 GN=BAG3 PE=1 SV=3	21.2076	19.3845	2	0	1.82317	1.84503	3.36498e-05	0.00013394	Yes	Yes	Yes	1.45246	2.02694
O95861	BPNT1	10	sp|O95861|BPNT1_HUMAN 3(2),5-bisphosphate nucleotidase 1 OS=Homo sapiens OX=9606 GN=BPNT1 PE=1 SV=1	20.5028	19.3932	1	0	1.10955	1.12286	0.000207039	0.000711017	No	No	Yes	1.15637	3.23705
O95864	FADS2	10	sp|O95864|FADS2_HUMAN Acyl-CoA 6-desaturase OS=Homo sapiens OX=9606 GN=FADS2 PE=1 SV=1	18.2507	22.5676	0	3	-4.31693	-4.36872	0.0277244	0.0632366	No	No	Yes	2.55762	3.86734
P00338	LDHA	29	sp|P00338|LDHA_HUMAN L-lactate dehydrogenase A chain OS=Homo sapiens OX=9606 GN=LDHA PE=1 SV=2	25.4106	24.8036	4	4	0.606942	0.614222	0.0415551	0.089214	No	No	Yes	2.65573	3.38709
P00367	GLUD1	30	sp|P00367|DHE3_HUMAN Glutamate dehydrogenase 1, mitochondrial OS=Homo sapiens OX=9606 GN=GLUD1 PE=1 SV=2;sp|P49448|DHE4_HUMAN Glutamate dehydrogenase 2, mitochondrial OS=Homo sapiens OX=9606 GN=GLUD2 PE=1 SV=2	21.6853	19.4006	1	0	2.28465	2.31206	4.48539e-09	1.15234e-07	No	No	Yes	1.39047	2.66076
P00387	CYB5R3	18	sp|P00387|NB5R3_HUMAN NADH-cytochrome b5 reductase 3 OS=Homo sapiens OX=9606 GN=CYB5R3 PE=1 SV=3	22.5971	23.012	4	4	-0.414847	-0.419823	0.223962	0.322188	No	No	Yes	2.0118	3.31649
P00488	F13A1	5	sp|P00488|F13A_HUMAN Coagulation factor XIII A chain OS=Homo sapiens OX=9606 GN=F13A1 PE=1 SV=4	22.8263	19.4605	3	0	3.36581	3.40618	0.065142	0.125543	No	No	No		3.52423
P00491	PNP	20	sp|P00491|PNPH_HUMAN Purine nucleoside phosphorylase OS=Homo sapiens OX=9606 GN=PNP PE=1 SV=2	20.112	20.7013	3	3	-0.589305	-0.596374	0.433111	0.534658	No	No	Yes	1.16456	3.18101
P00558	PGK1	47	sp|P00558|PGK1_HUMAN Phosphoglycerate kinase 1 OS=Homo sapiens OX=9606 GN=PGK1 PE=1 SV=3	25.4631	24.1746	4	4	1.28851	1.30396	0.0131319	0.0325978	Yes	Yes	Yes	2.32565	2.94241
P01036	CST4	1	sp|P01036|CYTS_HUMAN Cystatin-S OS=Homo sapiens OX=9606 GN=CST4 PE=1 SV=3	18.1807	21.5672	0	1	-3.38649	-3.42711	1.4381e-07	1.34051e-06	No	No	No		2.98596
P01040	CSTA	7	sp|P01040|CYTA_HUMAN Cystatin-A OS=Homo sapiens OX=9606 GN=CSTA PE=1 SV=1	22.7545	19.3333	2	0	3.42116	3.4622	3.25656e-05	0.000129907	Yes	Yes	Yes	0.0198189	1.56608
P01111	NRAS	3	sp|P01111|RASN_HUMAN GTPase NRas OS=Homo sapiens OX=9606 GN=NRAS PE=1 SV=1	21.1334	21.2296	3	2	-0.0962143	-0.0973684	0.891777	0.925339	No	No	Yes	1.77816	3.10938
P01591	IGJ	2	sp|P01591|IGJ_HUMAN Immunoglobulin J chain OS=Homo sapiens OX=9606 GN=JCHAIN PE=1 SV=4	18.1846	24.3577	0	1	-6.17309	-6.24714	4.69809e-13	8.58341e-10	No	No	No		3.04197
P01833	PIGR	11	sp|P01833|PIGR_HUMAN Polymeric immunoglobulin receptor OS=Homo sapiens OX=9606 GN=PIGR PE=1 SV=4	23.747	19.4272	1	0	4.31977	4.37159	9.29873e-09	1.78829e-07	No	No	No		3.79636
P01834	IGKC	5	sp|P01834|IGKC_HUMAN Immunoglobulin kappa constant OS=Homo sapiens OX=9606 GN=IGKC PE=1 SV=2;sp|P0DOX7|IGK_HUMAN Immunoglobulin kappa light chain OS=Homo sapiens OX=9606 PE=1 SV=1	23.3675	23.2005	1	2	0.166922	0.168925	0.726792	0.794644	No	No	No		2.53362
P01876	IGHA1	6	sp|P01876|IGHA1_HUMAN Immunoglobulin heavy constant alpha 1 OS=Homo sapiens OX=9606 GN=IGHA1 PE=1 SV=2	22.7691	24.8503	3	4	-2.08127	-2.10623	0.347546	0.451291	No	No	No		3.19572
P01877	IGHA2	1	sp|P01877|IGHA2_HUMAN Immunoglobulin heavy constant alpha 2 OS=Homo sapiens OX=9606 GN=IGHA2 PE=1 SV=4;sp|P0DOX2|IGA2_HUMAN Immunoglobulin alpha-2 heavy chain OS=Homo sapiens OX=9606 PE=1 SV=2	18.2113	22.5097	0	1	-4.29842	-4.34998	6.50113e-07	4.57957e-06	No	No	No		3.12677
P02452	COL1A1	28	sp|P02452|CO1A1_HUMAN Collagen alpha-1(I) chain OS=Homo sapiens OX=9606 GN=COL1A1 PE=1 SV=5	18.1989	24.2126	0	4	-6.01368	-6.08582	0.000861054	0.00266184	Yes	Yes	Yes	3.40555	3.33712
P02462	COL4A1	9	sp|P02462|CO4A1_HUMAN Collagen alpha-1(IV) chain OS=Homo sapiens OX=9606 GN=COL4A1 PE=1 SV=4	25.7757	26.1387	4	4	-0.362999	-0.367353	0.542309	0.629879	No	No	Yes	2.20465	3.42928
P02545	LMNA	78	sp|P02545|LMNA_HUMAN Prelamin-A/C OS=Homo sapiens OX=9606 GN=LMNA PE=1 SV=1	27.3303	26.7158	4	4	0.614495	0.621866	0.280967	0.385537	No	No	No		3.02291
P02679	FGG	3	sp|P02679|FIBG_HUMAN Fibrinogen gamma chain OS=Homo sapiens OX=9606 GN=FGG PE=1 SV=3	26.7032	24.7965	4	4	1.90674	1.92962	0.0828788	0.147009	No	No	No		3.28985
P02751	FN1	125	sp|P02751|FINC_HUMAN Fibronectin OS=Homo sapiens OX=9606 GN=FN1 PE=1 SV=5	31.6776	30.3941	4	4	1.28353	1.29893	0.230583	0.330412	No	No	Yes	2.46301	4.04111
P02786	TFRC	42	sp|P02786|TFR1_HUMAN Transferrin receptor protein 1 OS=Homo sapiens OX=9606 GN=TFRC PE=1 SV=2	23.7477	23.2691	4	4	0.478599	0.48434	0.564502	0.651513	No	No	Yes	2.53409	3.7448
P02788	LTF	36	sp|P02788|TRFL_HUMAN Lactotransferrin OS=Homo sapiens OX=9606 GN=LTF PE=1 SV=6	23.2887	23.2542	3	3	0.0345374	0.0349517	0.990208	0.991837	No	No	No		3.59248
P02792	FTL	7	sp|P02792|FRIL_HUMAN Ferritin light chain OS=Homo sapiens OX=9606 GN=FTL PE=1 SV=2	23.5088	23.2979	4	1	0.210836	0.213365	0.0429668	0.091706	No	No	Yes	2.54287	3.03347
P02794	FTH1	13	sp|P02794|FRIH_HUMAN Ferritin heavy chain OS=Homo sapiens OX=9606 GN=FTH1 PE=1 SV=2	24.9956	23.697	4	2	1.29862	1.31419	0.11549	0.191644	No	No	Yes	2.33065	3.0244
P04040	CAT	24	sp|P04040|CATA_HUMAN Catalase OS=Homo sapiens OX=9606 GN=CAT PE=1 SV=3	23.8417	24.6977	4	4	-0.855984	-0.866252	0.0522867	0.107819	No	No	Yes	1.65476	3.3085
P04066	FUCA1	4	sp|P04066|FUCO_HUMAN Tissue alpha-L-fucosidase OS=Homo sapiens OX=9606 GN=FUCA1 PE=1 SV=4	18.2384	23.7055	0	1	-5.4671	-5.53268	9.71824e-11	1.61411e-08	No	No	Yes	1.5061	3.39184
P04075	ALDOA	38	sp|P04075|ALDOA_HUMAN Fructose-bisphosphate aldolase A OS=Homo sapiens OX=9606 GN=ALDOA PE=1 SV=2	26.099	24.8633	4	4	1.23573	1.25056	0.0727769	0.133717	No	No	Yes	2.16307	3.1563
P04080	CSTB	4	sp|P04080|CYTB_HUMAN Cystatin-B OS=Homo sapiens OX=9606 GN=CSTB PE=1 SV=2	23.1632	19.4101	1	0	3.75314	3.79816	1.11312e-06	7.21158e-06	No	No	Yes	1.83845	1.67154
P04083	ANXA1	28	sp|P04083|ANXA1_HUMAN Annexin A1 OS=Homo sapiens OX=9606 GN=ANXA1 PE=1 SV=2	26.7287	26.3662	4	4	0.362497	0.366846	0.0944637	0.163743	No	No	Yes	2.19172	3.15554
P04114	APOB	7	sp|P04114|APOB_HUMAN Apolipoprotein B-100 OS=Homo sapiens OX=9606 GN=APOB PE=1 SV=2	23.7271	22.3642	4	3	1.36291	1.37926	0.254299	0.3571	No	No	No		4.11356
P04181	OAT	36	sp|P04181|OAT_HUMAN Ornithine aminotransferase, mitochondrial OS=Homo sapiens OX=9606 GN=OAT PE=1 SV=1	26.0587	25.7392	4	4	0.319484	0.323316	0.372283	0.47865	No	No	Yes	1.73429	3.37523
P04183	TK1	13	sp|P04183|KITH_HUMAN Thymidine kinase, cytosolic OS=Homo sapiens OX=9606 GN=TK1 PE=1 SV=2	24.4994	23.9401	4	4	0.559388	0.566098	0.0455376	0.0961817	No	No	Yes	1.71418	3.01418
P04216	THY1	4	sp|P04216|THY1_HUMAN Thy-1 membrane glycoprotein OS=Homo sapiens OX=9606 GN=THY1 PE=1 SV=2	23.5346	22.6096	4	3	0.925004	0.936099	0.455901	0.556401	No	No	Yes	1.97402	3.43091
P04350	TUBB4A	4	sp|P04350|TBB4A_HUMAN Tubulin beta-4A chain OS=Homo sapiens OX=9606 GN=TUBB4A PE=1 SV=2	24.0226	22.5241	4	3	1.49858	1.51655	0.260233	0.363213	No	No	Yes	0.370277	2.84742
P04406	GAPDH	38	sp|P04406|G3P_HUMAN Glyceraldehyde-3-phosphate dehydrogenase OS=Homo sapiens OX=9606 GN=GAPDH PE=1 SV=3	28.2664	28.2887	4	4	-0.022269	-0.0225362	0.921043	0.945895	No	No	Yes	3.19232	2.94397
P04632	CAPNS1	13	sp|P04632|CPNS1_HUMAN Calpain small subunit 1 OS=Homo sapiens OX=9606 GN=CAPNS1 PE=1 SV=1	21.0728	19.3779	3	0	1.69494	1.71527	0.0860919	0.15124	No	No	Yes	2.01225	2.85431
P04792	HSPB1	20	sp|P04792|HSPB1_HUMAN Heat shock protein beta-1 OS=Homo sapiens OX=9606 GN=HSPB1 PE=1 SV=2	27.688	27.7229	4	4	-0.0349136	-0.0353324	0.868484	0.903599	No	No	Yes	2.74638
P04818	TYMS	16	sp|P04818|TYSY_HUMAN Thymidylate synthase OS=Homo sapiens OX=9606 GN=TYMS PE=1 SV=3	26.3637	25.514	4	4	0.84971	0.859903	0.00873117	0.0224674	No	No	Yes	2.62644	3.27998
P04843	RPN1	41	sp|P04843|RPN1_HUMAN Dolichyl-diphosphooligosaccharide--protein glycosyltransferase subunit 1 OS=Homo sapiens OX=9606 GN=RPN1 PE=1 SV=1	22.3125	21.6578	4	4	0.654663	0.662516	0.415567	0.518607	No	No	Yes	2.33271	3.66372
P04899	GNAI2	14	sp|P04899|GNAI2_HUMAN Guanine nucleotide-binding protein G(i) subunit alpha-2 OS=Homo sapiens OX=9606 GN=GNAI2 PE=1 SV=3	26.1414	25.9351	4	4	0.206327	0.208802	0.28971	0.392948	No	No	No		3.33311
P05023	ATP1A1	42	sp|P05023|AT1A1_HUMAN Sodium/potassium-transporting ATPase subunit alpha-1 OS=Homo sapiens OX=9606 GN=ATP1A1 PE=1 SV=1	23.5531	23.0242	4	2	0.528933	0.535277	0.244142	0.345773	No	No	Yes	2.63792	4.11589
P05089	ARG1	14	sp|P05089|ARGI1_HUMAN Arginase-1 OS=Homo sapiens OX=9606 GN=ARG1 PE=1 SV=2	23.7859	24.7322	4	4	-0.946296	-0.957647	0.169616	0.259105	No	No	No		3.32248
P05091	ALDH2	29	sp|P05091|ALDH2_HUMAN Aldehyde dehydrogenase, mitochondrial OS=Homo sapiens OX=9606 GN=ALDH2 PE=1 SV=2	23.5681	24.2512	4	4	-0.683139	-0.691334	0.131124	0.212496	No	No	Yes	1.52972	3.41287
P05109	S100A8	8	sp|P05109|S10A8_HUMAN Protein S100-A8 OS=Homo sapiens OX=9606 GN=S100A8 PE=1 SV=1	22.9552	25.3077	3	4	-2.35251	-2.38073	0.179744	0.271175	No	No	No		2.77463
P05121	SERPINE1	13	sp|P05121|PAI1_HUMAN Plasminogen activator inhibitor 1 OS=Homo sapiens OX=9606 GN=SERPINE1 PE=1 SV=1	23.1435	23.4679	4	4	-0.324431	-0.328322	0.470707	0.570658	No	No	Yes	2.44843	3.53346
P05141	SLC25A5	20	sp|P05141|ADT2_HUMAN ADP/ATP translocase 2 OS=Homo sapiens OX=9606 GN=SLC25A5 PE=1 SV=7	27.6807	27.3645	4	4	0.316185	0.319978	0.0568812	0.116019	No	No	Yes	2.41898	3.51006
P05164	MPO	17	sp|P05164|PERM_HUMAN Myeloperoxidase OS=Homo sapiens OX=9606 GN=MPO PE=1 SV=1	18.2283	26.0507	0	1	-7.82244	-7.91627	1.36579e-11	6.23823e-09	No	No	No		3.40945
P05198	EIF2S1	26	sp|P05198|IF2A_HUMAN Eukaryotic translation initiation factor 2 subunit 1 OS=Homo sapiens OX=9606 GN=EIF2S1 PE=1 SV=3	25.8787	25.2681	4	4	0.610589	0.617914	0.0203842	0.048492	No	No	Yes	1.97845	3.05949
P05204	HMGN2	6	sp|P05204|HMGN2_HUMAN Non-histone chromosomal protein HMG-17 OS=Homo sapiens OX=9606 GN=HMGN2 PE=1 SV=3	23.6449	24.9816	4	4	-1.33664	-1.35267	0.0392021	0.0846599	No	No	Yes	1.59057
P05388	RPLP0	20	sp|P05388|RLA0_HUMAN 60S acidic ribosomal protein P0 OS=Homo sapiens OX=9606 GN=RPLP0 PE=1 SV=1;sp|Q8NHW5|RLA0L_HUMAN 60S acidic ribosomal protein P0-like OS=Homo sapiens OX=9606 GN=RPLP0P6 PE=5 SV=1	25.66	24.9419	4	4	0.718174	0.726789	0.0259748	0.0599192	No	No	Yes	2.81847	3.15087
P05556	ITGB1	36	sp|P05556|ITB1_HUMAN Integrin beta-1 OS=Homo sapiens OX=9606 GN=ITGB1 PE=1 SV=2	21.9249	22.7215	3	1	-0.796626	-0.806182	0.44293	0.54425	No	No	Yes	2.80811	3.71968
P05783	KRT18	30	sp|P05783|K1C18_HUMAN Keratin, type I cytoskeletal 18 OS=Homo sapiens OX=9606 GN=KRT18 PE=1 SV=2	26.0016	24.0159	4	4	1.98563	2.00945	0.0153834	0.0375743	Yes	Yes	Yes	1.8647	2.41482
P06396	GSN	5	sp|P06396|GELS_HUMAN Gelsolin OS=Homo sapiens OX=9606 GN=GSN PE=1 SV=1	21.1337	19.3758	1	0	1.75796	1.77904	8.57663e-09	1.68489e-07	No	No	Yes	1.39644	3.56454
P06400	RB1	4	sp|P06400|RB_HUMAN Retinoblastoma-associated protein OS=Homo sapiens OX=9606 GN=RB1 PE=1 SV=2	21.9033	21.5083	1	1	0.394969	0.399707	0.000647775	0.00205823	No	No	Yes	1.6466	3.89466
P06493	CDK1	22	sp|P06493|CDK1_HUMAN Cyclin-dependent kinase 1 OS=Homo sapiens OX=9606 GN=CDK1 PE=1 SV=3	25.4783	25.6156	4	4	-0.137381	-0.139029	0.525263	0.617141	No	No	Yes	2.31255	3.28504
P06576	ATP5B	40	sp|P06576|ATPB_HUMAN ATP synthase subunit beta, mitochondrial OS=Homo sapiens OX=9606 GN=ATP5F1B PE=1 SV=3	21.797	21.6977	4	2	0.0992352	0.100426	0.789784	0.84286	No	No	Yes	2.12418	3.52404
P06702	S100A9	10	sp|P06702|S10A9_HUMAN Protein S100-A9 OS=Homo sapiens OX=9606 GN=S100A9 PE=1 SV=1	24.8659	25.9488	4	4	-1.08289	-1.09588	0.0127315	0.031647	Yes	Yes	No		2.47104
P06730	EIF4E	8	sp|P06730|IF4E_HUMAN Eukaryotic translation initiation factor 4E OS=Homo sapiens OX=9606 GN=EIF4E PE=1 SV=2	23.636	19.4233	1	0	4.21269	4.26322	3.52373e-09	9.90439e-08	No	No	Yes	1.66979	2.9538
P06733	ENO1	53	sp|P06733|ENOA_HUMAN Alpha-enolase OS=Homo sapiens OX=9606 GN=ENO1 PE=1 SV=2	25.8153	25.6105	4	4	0.204776	0.207233	0.247554	0.349792	No	No	Yes	2.78363	2.71372
P06748	NPM1	38	sp|P06748|NPM_HUMAN Nucleophosmin OS=Homo sapiens OX=9606 GN=NPM1 PE=1 SV=2	27.4741	27.7449	4	4	-0.270763	-0.274011	0.510367	0.605088	No	No	Yes	2.69879	1.44762
P06753	TPM3	9	sp|P06753|TPM3_HUMAN Tropomyosin alpha-3 chain OS=Homo sapiens OX=9606 GN=TPM3 PE=1 SV=2	22.3369	23.3923	3	1	-1.05536	-1.06802	0.376243	0.481706	No	No	Yes	2.32787	1.23502
P06756	ITGAV	32	sp|P06756|ITAV_HUMAN Integrin alpha-V OS=Homo sapiens OX=9606 GN=ITGAV PE=1 SV=2	24.318	24.1479	4	4	0.170117	0.172157	0.540307	0.628449	No	No	Yes	2.27511	3.8206
P07195	LDHB	27	sp|P07195|LDHB_HUMAN L-lactate dehydrogenase B chain OS=Homo sapiens OX=9606 GN=LDHB PE=1 SV=2	24.9847	24.1172	4	4	0.867492	0.877898	0.166835	0.256572	No	No	Yes	2.71062	3.3374
P07237	P4HB	52	sp|P07237|PDIA1_HUMAN Protein disulfide-isomerase OS=Homo sapiens OX=9606 GN=P4HB PE=1 SV=3	23.0155	22.2905	4	3	0.725057	0.733754	0.603486	0.685677	No	No	Yes	2.45576	3.39633
P07305	H1F0	9	sp|P07305|H10_HUMAN Histone H1.0 OS=Homo sapiens OX=9606 GN=H1-0 PE=1 SV=3	24.7037	25.3479	4	4	-0.64418	-0.651907	0.379004	0.482936	No	No	Yes	2.25932	2.39387
P07339	CTSD	16	sp|P07339|CATD_HUMAN Cathepsin D OS=Homo sapiens OX=9606 GN=CTSD PE=1 SV=1	22.2733	23.2846	1	2	-1.0113	-1.02344	0.065566	0.125829	No	No	Yes	1.80993	3.48327
P07355	ANXA2	50	sp|P07355|ANXA2_HUMAN Annexin A2 OS=Homo sapiens OX=9606 GN=ANXA2 PE=1 SV=2;sp|A6NMY6|AXA2L_HUMAN Putative annexin A2-like protein OS=Homo sapiens OX=9606 GN=ANXA2P2 PE=5 SV=2	29.264	29.1378	4	4	0.126123	0.127636	0.406944	0.51185	No	No	Yes	3.03325	3.28407
P07384	CAPN1	21	sp|P07384|CAN1_HUMAN Calpain-1 catalytic subunit OS=Homo sapiens OX=9606 GN=CAPN1 PE=1 SV=1	24.4596	23.7526	4	4	0.707034	0.715515	0.0324971	0.0723	No	No	Yes	1.27631	3.54499
P07437	TUBB	7	sp|P07437|TBB5_HUMAN Tubulin beta chain OS=Homo sapiens OX=9606 GN=TUBB PE=1 SV=2	28.7734	28.6191	4	4	0.154357	0.156208	0.6887	0.762117	No	No	Yes	3.14448	2.9807
P07737	PFN1	21	sp|P07737|PROF1_HUMAN Profilin-1 OS=Homo sapiens OX=9606 GN=PFN1 PE=1 SV=2	24.8014	24.1295	4	4	0.6719	0.67996	0.120564	0.198538	No	No	Yes	2.17694	2.92896
P07741	APRT	14	sp|P07741|APT_HUMAN Adenine phosphoribosyltransferase OS=Homo sapiens OX=9606 GN=APRT PE=1 SV=2	22.1325	22.9917	3	4	-0.859197	-0.869504	0.490303	0.588557	No	No	Yes	1.52194	2.42017
P07814	EPRS	85	sp|P07814|SYEP_HUMAN Bifunctional glutamate/proline--tRNA ligase OS=Homo sapiens OX=9606 GN=EPRS1 PE=1 SV=5	26.6401	25.675	4	4	0.965077	0.976653	0.0850578	0.150055	No	No	Yes	2.70969	3.59565
P07900	HSP90AA1	45	sp|P07900|HS90A_HUMAN Heat shock protein HSP 90-alpha OS=Homo sapiens OX=9606 GN=HSP90AA1 PE=1 SV=5	26.7775	25.8186	4	4	0.958839	0.970341	0.0551488	0.11321	No	No	Yes	3.22726	3.55723
P07910	HNRNPC	36	sp|P07910|HNRPC_HUMAN Heterogeneous nuclear ribonucleoproteins C1/C2 OS=Homo sapiens OX=9606 GN=HNRNPC PE=1 SV=4	26.1502	25.9192	4	4	0.231042	0.233813	0.72251	0.791857	No	No	Yes	2.40323	2.82873
P07947	YES1	15	sp|P07947|YES_HUMAN Tyrosine-protein kinase Yes OS=Homo sapiens OX=9606 GN=YES1 PE=1 SV=3	25.1569	24.4274	4	4	0.729543	0.738294	0.0485421	0.101472	No	No	Yes	2.44099	3.17734
P07996	THBS1	6	sp|P07996|TSP1_HUMAN Thrombospondin-1 OS=Homo sapiens OX=9606 GN=THBS1 PE=1 SV=2	25.2375	25.8941	4	4	-0.656615	-0.664491	0.00627559	0.0167136	No	No	Yes	2.69851	3.59007
P08133	ANXA6	44	sp|P08133|ANXA6_HUMAN Annexin A6 OS=Homo sapiens OX=9606 GN=ANXA6 PE=1 SV=3	24.3319	22.6985	4	4	1.6334	1.65299	0.0211983	0.0499089	Yes	Yes	Yes	1.92299	3.4386
P08195	SLC3A2	25	sp|P08195|4F2_HUMAN 4F2 cell-surface antigen heavy chain OS=Homo sapiens OX=9606 GN=SLC3A2 PE=1 SV=3	22.7489	21.4371	4	3	1.31183	1.32757	0.191905	0.286811	No	No	Yes	2.09652	3.43665
P08237	PFKM	17	sp|P08237|PFKAM_HUMAN ATP-dependent 6-phosphofructokinase, muscle type OS=Homo sapiens OX=9606 GN=PFKM PE=1 SV=2	22.4172	23.3461	3	2	-0.928976	-0.940119	0.442979	0.54425	No	No	Yes	1.0989	3.39753
P08238	HSP90AB1	35	sp|P08238|HS90B_HUMAN Heat shock protein HSP 90-beta OS=Homo sapiens OX=9606 GN=HSP90AB1 PE=1 SV=4	30.0657	29.716	4	4	0.349769	0.353964	0.19903	0.294493	No	No	Yes	3.47673	3.54736
P08240	SRPR	24	sp|P08240|SRPRA_HUMAN Signal recognition particle receptor subunit alpha OS=Homo sapiens OX=9606 GN=SRPRA PE=1 SV=2	18.2496	20.6307	0	3	-2.38114	-2.4097	0.0105878	0.0266806	Yes	Yes	No		3.73404
P08243	ASNS	25	sp|P08243|ASNS_HUMAN Asparagine synthetase [glutamine-hydrolyzing] OS=Homo sapiens OX=9606 GN=ASNS PE=1 SV=4	23.9739	23.7865	4	4	0.187364	0.189612	0.837932	0.880335	No	No	Yes	1.53178	3.37735
P08246	ELANE	2	sp|P08246|ELNE_HUMAN Neutrophil elastase OS=Homo sapiens OX=9606 GN=ELANE PE=1 SV=1	18.2283	25.6249	0	1	-7.39664	-7.48537	1.04947e-06	6.82344e-06	No	No	No		3.11983
P08311	CTSG	5	sp|P08311|CATG_HUMAN Cathepsin G OS=Homo sapiens OX=9606 GN=CTSG PE=1 SV=2	18.2193	24.4089	0	1	-6.18959	-6.26384	2.64288e-09	8.94176e-08	No	No	No		2.9893
P08559	PDHA1	29	sp|P08559|ODPA_HUMAN Pyruvate dehydrogenase E1 component subunit alpha, somatic form, mitochondrial OS=Homo sapiens OX=9606 GN=PDHA1 PE=1 SV=3	24.6592	24.3223	4	4	0.336902	0.340943	0.504347	0.599507	No	No	Yes	1.67729	2.49877
P08572	COL4A2	13	sp|P08572|CO4A2_HUMAN Collagen alpha-2(IV) chain OS=Homo sapiens OX=9606 GN=COL4A2 PE=1 SV=4	24.1759	25.1399	4	4	-0.963983	-0.975546	0.113467	0.189146	No	No	Yes	2.53077	3.52947
P08574	CYC1	14	sp|P08574|CY1_HUMAN Cytochrome c1, heme protein, mitochondrial OS=Homo sapiens OX=9606 GN=CYC1 PE=1 SV=3	22.1722	19.3987	1	0	2.77345	2.80671	1.5453e-05	6.61185e-05	No	No	Yes	1.92811	2.94131
P08621	SNRNP70	30	sp|P08621|RU17_HUMAN U1 small nuclear ribonucleoprotein 70 kDa OS=Homo sapiens OX=9606 GN=SNRNP70 PE=1 SV=2	25.6174	25.7768	4	4	-0.159364	-0.161275	0.618583	0.700651	No	No	Yes	1.88519	2.57777
P08670	VIM	80	sp|P08670|VIME_HUMAN Vimentin OS=Homo sapiens OX=9606 GN=VIM PE=1 SV=4	29.5046	28.7475	4	4	0.757119	0.766201	0.316539	0.419983	No	No	Yes	3.09216	1.60173
P08708	RPS17	14	sp|P08708|RS17_HUMAN 40S ribosomal protein S17 OS=Homo sapiens OX=9606 GN=RPS17 PE=1 SV=2	24.1347	24.2196	4	4	-0.084846	-0.0858638	0.837048	0.87992	No	No	Yes	2.52421	1.33304
P08754	GNAI3	13	sp|P08754|GNAI3_HUMAN Guanine nucleotide-binding protein G(i) subunit alpha OS=Homo sapiens OX=9606 GN=GNAI3 PE=1 SV=3	24.158	23.8394	4	4	0.318666	0.322488	0.365058	0.470685	No	No	No		3.48008
P08758	ANXA5	24	sp|P08758|ANXA5_HUMAN Annexin A5 OS=Homo sapiens OX=9606 GN=ANXA5 PE=1 SV=2	23.2784	22.4689	4	4	0.809517	0.819227	0.06733	0.12699	No	No	Yes	2.29069	3.45922
P08865	RPSA	17	sp|P08865|RSSA_HUMAN 40S ribosomal protein SA OS=Homo sapiens OX=9606 GN=RPSA PE=1 SV=4	24.9951	24.9141	4	4	0.0809712	0.0819424	0.780032	0.834867	No	No	Yes	2.19309	3.2362
P09001	MRPL3	12	sp|P09001|RM03_HUMAN 39S ribosomal protein L3, mitochondrial OS=Homo sapiens OX=9606 GN=MRPL3 PE=1 SV=1	22.1694	22.9837	1	2	-0.814293	-0.82406	0.0727867	0.133717	No	No	Yes	1.72764	3.03158
P09012	SNRPA	11	sp|P09012|SNRPA_HUMAN U1 small nuclear ribonucleoprotein A OS=Homo sapiens OX=9606 GN=SNRPA PE=1 SV=3	22.8697	22.7998	1	2	0.0699042	0.0707427	0.735218	0.800502	No	No	Yes	1.53044	3.10511
P09110	ACAA1	16	sp|P09110|THIK_HUMAN 3-ketoacyl-CoA thiolase, peroxisomal OS=Homo sapiens OX=9606 GN=ACAA1 PE=1 SV=2	21.7827	19.4213	3	0	2.3614	2.38972	0.0658316	0.125872	No	No	Yes	1.11614	3.16755
P09211	GSTP1	17	sp|P09211|GSTP1_HUMAN Glutathione S-transferase P OS=Homo sapiens OX=9606 GN=GSTP1 PE=1 SV=2	24.8172	24.5724	4	4	0.244803	0.24774	0.414337	0.51778	No	No	Yes	2.59893	2.85783
P09382	LGALS1	14	sp|P09382|LEG1_HUMAN Galectin-1 OS=Homo sapiens OX=9606 GN=LGALS1 PE=1 SV=2	27.4388	27.2457	4	4	0.193083	0.195399	0.475057	0.573647	No	No	Yes	2.46517	1.67302
P09429	HMGB1	15	sp|P09429|HMGB1_HUMAN High mobility group protein B1 OS=Homo sapiens OX=9606 GN=HMGB1 PE=1 SV=3;sp|B2RPK0|HGB1A_HUMAN Putative high mobility group protein B1-like 1 OS=Homo sapiens OX=9606 GN=HMGB1P1 PE=5 SV=1	25.0869	24.5141	4	4	0.572722	0.579592	0.250643	0.353338	No	No	Yes	2.46524	2.97115
[truncated: 1,534 more rows]

## Sheet: U2OS - CPT v. DMSO - INS
Protein.ID	Gene.name	Peptide.counts..unique.	Fasta.headers	avg.Case.log.intensity	avg.Control.log.intensity	avg.Case.num.reps	avg.Control.num.reps	log2foldChange	log2foldChange.adjusted	p.value	p.adjust.value	Significant	Significant.adjusted	Identified in ctrl RNAseq?	log10(CPMs ctrl)	TANGO
[truncated: 1,342 more rows]

[truncated: 4 more sheets: HEK293T - ATM inh v. DMSO - WCL, HEK293T - CPT v. DMSO - WCL, U2OS - ATM KO v. WT - WCL, U2OS - CPT v. DMSO - WCL]
