# Supplementary material for: Targeting DNA topoisomerases or checkpoint kinases results in an overload of chaperone systems, triggering aggregation of a metastable subproteome
Source: eLife. 2022 Feb 24;11:e70726. doi: 10.7554/eLife.70726 (PMC8871389; doi:10.7554/eLife.70726)
Supplement: Supplementary file 2. [file elife-70726-supp2.xlsx]

## Sheet: Information
Supplemental Table 2. Differential expression analysis of RNA sequencing data
ABOUT THIS DOCUMENT
This document lists all significant differentially expressed (DE) genes that were identified in our RNA sequencing analysis. DE genes were identified using the likelihood ratio test implemented in edgeR.
These data are from 4 independent biological repeats for each comparison
Sheet 1 contains DE genes in ATM inhibitor-treated HEK293T cells compared to vehicle-treated (DMSO) HEK293T cells
Sheet 2 contains DE genes in CPT-treated HEK293T cells compared to vehicle-treated (DMSO) HEK293T cells
Sheet 3 contains DE genes in U2OS ATM KO compared to U2OS WT
Sheet 4 contains DE genes in CPT-treated U2OS cells compared to vehicle-treated (DMSO) U2OS cells
Sheet 5 contains DE genes in normal, unstressed U2OS cells compared to unstressed HEK293T cells

## Sheet: DE - HEK293T ATM inh v. DMSO
Gene name	logFoldChange	logCountsPerMillion	LR	PValue	FDR
MAGEA1	-1.97387	1.51625	20.5464	5.82037e-06	0.0287138
COX20P1	1.07436	2.99582	20.6749	5.44242e-06	0.0287138

## Sheet: DE - HEK293T CPT v. DMSO
Gene name	logFoldChange	logCountsPerMillion	LR	PValue	FDR
BCRP2	-5.44981	-0.0843693	27.0747	1.95743e-07	2.48802e-06
ASNSP1	-5.31911	3.14314	115.163	7.25015e-27	1.73653e-24
INHBE	-3.79319	2.71603	37.2226	1.05384e-09	2.23744e-08
SLC6A9	-3.77328	3.59952	98.0732	4.03197e-23	6.37176e-21
FAM86JP	-3.67455	0.774611	34.0837	5.27925e-09	9.43189e-08
SLC7A11	-3.50866	6.76693	247.597	8.67642e-56	1.90001e-52
HAPLN2	-3.46911	0.242422	25.1067	5.42432e-07	6.10495e-06
FUT1	-3.25897	0.430092	15.5286	8.12646e-05	0.000490897
LINC01419	-3.19721	3.92835	150.404	1.41437e-34	7.47615e-32
ASNS	-3.16403	6.98277	201.397	1.03511e-45	1.22056e-42
GABRD	-3.05664	2.08769	65.3728	6.19887e-16	4.03426e-14
MYC	-2.98577	5.40753	110.003	9.78658e-26	2.02728e-23
ALOXE3	-2.93784	0.249897	20.0369	7.59633e-06	6.23696e-05
AC002546.1	-2.85519	2.09989	79.7342	4.28324e-19	4.18203e-17
CHAC1	-2.82519	4.19548	82.9466	8.42994e-20	9.03654e-18
HBQ1	-2.81561	2.52096	77.115	1.61286e-18	1.46293e-16
HIST1H1E	-2.80069	4.98251	67.6401	1.9624e-16	1.39914e-14
TMEM225B	-2.70176	0.119748	14.6378	0.000130273	0.000732556
RAET1K	-2.67261	0.339815	17.2265	3.31782e-05	0.000224147
AC010542.5	-2.58393	0.736191	18.7132	1.51929e-05	0.000114443
AC078795.2	-2.57639	0.0311101	10.8733	0.000975595	0.00410736
DDIT4	-2.56626	6.34594	135.676	2.34845e-31	9.99982e-29
RUNX1T1	-2.56066	4.55512	163.619	1.83231e-37	1.20707e-34
RIPPLY2	-2.55924	-0.236608	8.48202	0.00358674	0.0123028
ALDH1L2	-2.4702	5.27978	183.049	1.04641e-41	9.43553e-39
AL035425.3	-2.41563	7.65442	203.369	3.84226e-46	4.90816e-43
TMEM145	-2.39454	1.94733	45.7821	1.32167e-11	4.1012e-10
MFSD3	-2.3749	4.59382	132.419	1.21143e-30	4.71381e-28
VLDLR.AS1	-2.37148	0.327739	10.8171	0.00100567	0.00420856
NT5M	-2.36546	1.57393	39.2955	3.64273e-10	8.48623e-09
AP001347.1	-2.34868	1.92506	40.6623	1.80941e-10	4.47363e-09
ADM2	-2.33793	2.51067	34.8348	3.58898e-09	6.65242e-08
HIST1H2AB	-2.32977	0.232993	11.1745	0.000829309	0.00356691
HSD17B8	-2.32319	2.65232	47.7215	4.91283e-12	1.66612e-10
PCK2	-2.31467	4.70722	92.7598	5.90423e-22	8.22781e-20
AL354872.2	-2.30776	2.47314	36.5369	1.49802e-09	3.03344e-08
MTHFD1L	-2.29362	4.84922	169.486	9.58374e-39	7.73206e-36
SNHG28	-2.29022	-0.121127	8.91344	0.00283079	0.0100704
NA..4520	-2.28978	0.493876	18.3418	1.84609e-05	0.000134884
NUPR1	-2.28482	3.15237	20.3574	6.42457e-06	5.39038e-05
IL18R1	-2.28406	1.32558	33.0133	9.15294e-09	1.54692e-07
PSAT1	-2.27319	7.44969	216.672	4.81297e-49	8.19755e-46
ANKMY1	-2.22631	0.834537	20.2011	6.9713e-06	5.7889e-05
EVA1C	-2.22292	0.273873	14.1176	0.000171733	0.000928569
DPH6	-2.21987	3.27229	63.0287	2.03715e-15	1.22461e-13
GYPC	-2.21739	2.58886	51.8815	5.8954e-13	2.3534e-11
ASS1	-2.18708	4.54941	59.4308	1.26668e-14	6.88545e-13
NA..4395	-2.16202	1.06303	22.0368	2.67475e-06	2.4813e-05
EFCAB10	-2.15023	1.69039	35.2474	2.90373e-09	5.51566e-08
SLC7A3	-2.1427	4.41842	102.544	4.21794e-24	7.78997e-22
DCST1.AS1	-2.13317	2.96002	55.3429	1.01237e-13	4.57777e-12
MYT1	-2.12394	0.909239	17.4191	2.99804e-05	0.000205624
MATK	-2.11806	1.92304	40.8027	1.684e-10	4.17028e-09
PRKN	-2.10536	1.36694	20.8156	5.05693e-06	4.35982e-05
AL590617.2	-2.09719	2.123	29.1686	6.63462e-08	9.35622e-07
FAM86B3P	-2.08358	0.352543	12.9573	0.000318676	0.00158055
EEF2KMT	-2.07762	1.80805	38.3992	5.76547e-10	1.28271e-08
RSAD1	-2.07353	3.56351	76.5781	2.11675e-18	1.88649e-16
DGCR9	-2.07198	-0.00233877	8.88823	0.00287016	0.0101938
PYCR1	-2.0676	6.45778	145.089	2.05366e-33	9.259e-31
SLC7A5	-2.06027	6.05373	110.894	6.24191e-26	1.34564e-23
LGR6	-2.05659	0.213916	9.45396	0.00210694	0.00782017
AC016691.1	-2.0362	0.152043	10.6704	0.00108865	0.00448481
ARL2	-2.03311	4.88153	123.518	1.07416e-28	3.38341e-26
FHIT	-2.02966	2.59548	53.8699	2.14214e-13	9.24981e-12
FAM86C2P	-2.02518	1.23422	24.048	9.39653e-07	9.77865e-06
AL596244.1	-2.01435	0.155539	10.7184	0.00106075	0.00438498
AC022893.2	-2.00791	0.937515	19.2941	1.12054e-05	8.75921e-05
SEMA5B	-2.00373	0.30541	9.10112	0.00255453	0.00921807
MAP2K6	-1.99981	4.18223	76.4762	2.22883e-18	1.96355e-16
SLC29A2	-1.99666	4.09541	92.5609	6.52862e-22	8.93547e-20
LMF1	-1.99661	2.91435	58.6571	1.87693e-14	9.78621e-13
AC093388.1	-1.99509	-0.0403423	8.83587	0.00295366	0.0104493
CTH	-1.99058	5.16566	58.5598	1.97207e-14	1.02474e-12
RAMP2	-1.98798	-0.0436444	8.76428	0.00307188	0.01082
EIF4EBP1	-1.98657	5.36287	110.019	9.70356e-26	2.02728e-23
ABLIM3	-1.98502	0.424803	10.0581	0.00151676	0.00592518
SLC37A4	-1.98241	5.26825	112.107	3.38548e-26	7.63177e-24
AC125616.1	-1.97887	0.304785	11.94	0.000549401	0.00251096
TRIB3	-1.96662	3.44705	30.379	3.55359e-08	5.27838e-07
HIST2H2AB	-1.96412	1.49376	17.4534	2.94431e-05	0.000202664
ATP8A1	-1.96199	4.20264	51.1525	8.54636e-13	3.33352e-11
LINC00574	-1.95883	-0.0806592	7.41049	0.00648446	0.0201189
ABCC11	-1.95493	-0.0383304	7.24678	0.00710284	0.0216805
CA2	-1.95034	6.51265	53.6809	2.3584e-13	1.00702e-11
NA..4406	-1.94975	0.136254	8.7091	0.00316626	0.0110964
BCAT1	-1.94942	6.38639	168.012	2.01124e-38	1.46811e-35
NT5C	-1.93811	4.49094	104.886	1.29384e-24	2.54274e-22
WDR17	-1.93528	2.67751	43.167	5.02625e-11	1.37831e-09
MGAT5B	-1.92582	0.687017	16.3358	5.30518e-05	0.00033758
FTCDNL1	-1.92557	0.275198	10.9815	0.000920256	0.00389255
TFAP4	-1.91911	3.88811	79.1843	5.65766e-19	5.45449e-17
CREG2	-1.91671	1.3736	18.5785	1.63052e-05	0.000121449
GALNT18	-1.90991	3.8627	47.3763	5.85869e-12	1.96087e-10
TENM1	-1.90929	4.94905	122.658	1.6571e-28	5.08033e-26
AC091563.1	-1.9028	0.0996389	9.50851	0.00204521	0.00763913
CLDND2	-1.89933	1.16494	19.8168	8.52315e-06	6.89817e-05
QPCTL	-1.89894	1.39907	8.04027	0.00457487	0.0151
IRS4	-1.89262	4.77151	86.3039	1.54302e-20	1.84788e-18
PAQR5	-1.89214	3.73533	62.5474	2.60112e-15	1.52186e-13
IFT140	-1.8768	3.0858	62.9422	2.12868e-15	1.26475e-13
DDR2	-1.87618	6.31185	99.314	2.15481e-23	3.55173e-21
AP006545.1	-1.86517	0.0619837	8.08033	0.00447483	0.0148377
AC027601.4	-1.86438	0.63967	14.8302	0.000117636	0.000671098
ARSG	-1.86378	1.03738	21.0501	4.47422e-06	3.91473e-05
SHMT2	-1.85903	5.94036	127.485	1.45465e-29	5.30914e-27
DHODH	-1.85822	2.77346	54.3118	1.71076e-13	7.49262e-12
PEMT	-1.84153	4.58794	101.963	5.65822e-24	9.96952e-22
NA..201	-1.84033	0.487813	12.4289	0.000422736	0.00200189
NA..3526	-1.83971	0.381256	9.24952	0.00235557	0.00860955
TAP2	-1.83945	4.40198	84.6557	3.55121e-20	4.03234e-18
TSC22D3	-1.83778	7.38286	162.522	3.18194e-37	1.95104e-34
PI15	-1.83576	0.754397	13.0561	0.000302291	0.00150832
ATF4	-1.83326	9.14098	93.5243	4.01247e-22	5.69511e-20
PAQR4	-1.82929	4.05089	87.8999	6.88527e-21	8.51164e-19
PRDM13	-1.82866	3.55258	75.9571	2.89899e-18	2.49655e-16
RPL10P6	-1.8275	0.487675	11.4693	0.000707563	0.00311243
ST6GAL1	-1.82647	3.17484	51.8136	6.10266e-13	2.42352e-11
HIST1H4E	-1.82137	-0.141521	6.18111	0.0129121	0.0355413
BEST1	-1.8185	1.02586	9.44391	0.00211852	0.00785553
AC017083.2	-1.81639	0.601728	11.6765	0.00063296	0.00283372
TERT	-1.80698	0.588706	12.5965	0.000386468	0.00186039
SH2D2A	-1.8048	2.46143	41.5433	1.15287e-10	2.97014e-09
RPL7AP6	-1.80428	0.705903	13.8106	0.000202188	0.00106823
HSD11B1L	-1.80146	3.04407	53.6927	2.3443e-13	1.00379e-11
AC106869.1	-1.80143	0.0240186	7.6299	0.00574085	0.0182009
AC026367.3	-1.80125	-0.158688	5.72292	0.0167448	0.0439673
NUDT8	-1.79753	2.34352	35.4762	2.5818e-09	4.95324e-08
FBXO36	-1.79439	0.828449	14.0819	0.000175023	0.000943364
RPS6KA2	-1.79061	3.62175	61.351	4.77542e-15	2.7012e-13
AL353796.1	-1.78793	1.35901	23.4982	1.2503e-06	1.26842e-05
AC002550.2	-1.78622	0.693208	11.3794	0.000742642	0.00323886
STC2	-1.77796	7.34901	119.663	7.49621e-28	2.01595e-25
PLCB2	-1.77606	0.464189	11.5685	0.000670803	0.00296846
MUC3A	-1.7708	0.0335667	6.97772	0.00825309	0.024532
OGDHL	-1.76243	1.83038	26.3936	2.78463e-07	3.38505e-06
COL23A1	-1.76094	0.298519	8.18928	0.00421386	0.0140974
AC016205.1	-1.75658	3.39579	62.967	2.10202e-15	1.25377e-13
JAKMIP1	-1.74968	2.41497	36.8998	1.24362e-09	2.59733e-08
NTHL1	-1.74608	3.77229	76.0338	2.78849e-18	2.41496e-16
SLC7A1	-1.74294	7.23001	167.293	2.88654e-38	2.01126e-35
ENOX1	-1.74287	3.41078	64.672	8.84629e-16	5.6502e-14
NA..116	-1.74231	3.64511	49.1933	2.31943e-12	8.33742e-11
LAMC3	-1.7322	1.51971	19.093	1.245e-05	9.60472e-05
ABRAXAS1	-1.72746	4.16184	82.2089	1.22439e-19	1.28553e-17
IMPDH2	-1.72653	7.2076	97.3903	5.69253e-23	8.90417e-21
IMMP2L	-1.72082	2.69577	29.1364	6.74579e-08	9.49551e-07
ASIC1	-1.71809	3.88473	69.4989	7.6459e-17	5.60785e-15
HAS2	-1.71036	3.43998	44.9035	2.06991e-11	6.17308e-10
AL035425.2	-1.70978	0.298741	6.3126	0.0119883	0.0334551
GEMIN8	-1.70966	2.27679	37.4603	9.3292e-10	1.99452e-08
IMPA2	-1.70337	3.36234	48.4969	3.30808e-12	1.15512e-10
KCNQ1	-1.70091	1.72948	21.246	4.03957e-06	3.56081e-05
SLC16A14	-1.70052	2.90504	44.9889	1.98158e-11	5.94434e-10
MAN2C1	-1.6975	2.49683	38.1051	6.70344e-10	1.47006e-08
AC092354.2	-1.69513	0.0286187	5.99001	0.0143871	0.0389097
VSIG10L	-1.69427	1.60442	25.0724	5.52164e-07	6.20537e-06
SLC6A15	-1.68548	5.50608	86.9836	1.09428e-20	1.32737e-18
RIMS3	-1.68309	2.01029	25.957	3.49101e-07	4.16125e-06
HIST1H4C	-1.68223	10.5623	117.561	2.16293e-27	5.6196e-25
TMTC4	-1.68125	4.08123	48.0461	4.16308e-12	1.42446e-10
APLN	-1.67994	1.61384	20.6144	5.61733e-06	4.79004e-05
BHLHE22	-1.67028	3.24027	43.7238	3.7814e-11	1.05583e-09
KIF17	-1.6681	1.83213	23.9169	1.00585e-06	1.0406e-05
PHGDH	-1.66607	7.93386	63.7523	1.41092e-15	8.75625e-14
TMC7	-1.66332	1.83422	22.7885	1.80846e-06	1.7646e-05
AC005070.3	-1.66296	0.130623	7.88135	0.00499472	0.0162075
EPHA8	-1.65849	2.10717	31.2236	2.29957e-08	3.57869e-07
RADIL	-1.65818	4.15348	71.9812	2.17255e-17	1.72555e-15
NA..4405	-1.64637	2.628	27.5332	1.54419e-07	2.02488e-06
ZC3H12B	-1.64401	2.92496	38.8114	4.66782e-10	1.05848e-08
SLC39A11	-1.64285	3.98174	52.5644	4.16378e-13	1.70204e-11
SLC16A9	-1.6408	4.28583	64.1905	1.12952e-15	7.06711e-14
NRM	-1.63632	3.60774	61.1925	5.17578e-15	2.91689e-13
HIST1H1D	-1.632	2.9152	24.5259	7.33185e-07	7.92037e-06
NA..3151	-1.63141	3.44356	49.3623	2.12796e-12	7.80372e-11
AC106820.3	-1.62724	0.771589	10.74	0.00104845	0.00435077
B3GAT2	-1.62072	2.88315	38.6356	5.10795e-10	1.14473e-08
GTPBP6	-1.62017	3.46238	40.1875	2.30715e-10	5.59592e-09
CLYBL	-1.6179	3.54442	55.0484	1.17598e-13	5.28638e-12
NA..182	-1.60826	0.0887198	6.69847	0.00964959	0.0279355
ZFAND1	-1.60705	5.29566	98.6639	2.992e-23	4.82783e-21
GDPD1	-1.60679	5.14072	85.4283	2.40258e-20	2.83301e-18
HADH	-1.59525	5.40641	96.8616	7.43459e-23	1.12836e-20
RAD23A	-1.59462	6.44829	110.869	6.32046e-26	1.34564e-23
ADAM11	-1.58439	2.74171	42.0749	8.78449e-11	2.30973e-09
KCNQ5	-1.58317	2.98297	47.739	4.86906e-12	1.65494e-10
MYRF	-1.58055	1.90579	14.3216	0.000154088	0.00084721
QTRT1	-1.57355	2.55374	22.3809	2.23586e-06	2.12818e-05
TAZ	-1.56385	4.3984	63.1949	1.87234e-15	1.13893e-13
BCRP7	-1.56024	1.09008	12.5735	0.000391247	0.00188075
HIST2H2AC	-1.55666	3.35009	17.4447	2.95781e-05	0.000203502
MPP7	-1.55666	3.42342	45.8521	1.27529e-11	3.96529e-10
TSPAN2	-1.55335	3.78321	51.7778	6.21517e-13	2.46182e-11
AC067838.1	-1.54597	0.972276	8.77857	0.0030479	0.0107479
NA..3495	-1.54508	2.6583	25.5191	4.38022e-07	5.04846e-06
STEAP3	-1.54	3.82111	37.7343	8.10647e-10	1.74774e-08
OCA2	-1.5392	1.5602	20.213	6.92808e-06	5.75612e-05
SFT2D3	-1.53822	3.81639	51.8554	5.97429e-13	2.3787e-11
GNGT1	-1.5382	0.54037	9.86198	0.00168729	0.00650843
AL133325.3	-1.53696	1.93536	17.7122	2.56975e-05	0.000179461
OSGEPL1	-1.53652	4.16853	50.5867	1.14017e-12	4.35853e-11
KYAT1	-1.5352	2.52526	28.4621	9.55493e-08	1.30425e-06
RNU5F.1	-1.53393	2.95283	22.4776	2.12611e-06	2.03695e-05
GGACT	-1.53361	2.53851	25.7295	3.92771e-07	4.58203e-06
CEBPB	-1.532	5.65386	48.7326	2.93351e-12	1.03612e-10
TEF	-1.53078	0.888978	12.4704	0.000413454	0.00196763
LARGE2	-1.53034	3.56469	54.0679	1.93683e-13	8.41066e-12
RASGEF1C	-1.5285	0.943273	9.71637	0.00182634	0.00694345
SLC43A1	-1.52783	3.94903	41.1694	1.39591e-10	3.53102e-09
RPRML	-1.52761	5.06561	38.9418	4.36633e-10	9.93511e-09
SLIT1	-1.52571	1.2128	11.8279	0.000583494	0.00264158
AC008677.2	-1.52416	0.0330333	5.62338	0.0177224	0.0459984
LHPP	-1.52269	3.07237	45.6271	1.43047e-11	4.38553e-10
ZBED3	-1.52174	4.48478	53.8329	2.1829e-13	9.39935e-12
AL390195.2	-1.52157	1.26159	15.1724	9.81295e-05	0.000574133
QRFPR	-1.52146	0.815791	10.9984	0.000911905	0.00386287
ROGDI	-1.51875	3.21149	35.1761	3.01198e-09	5.70008e-08
HDHD5.AS1	-1.51619	1.89589	22.402	2.21146e-06	2.10818e-05
E2F5	-1.51573	4.02853	45.1982	1.78068e-11	5.38384e-10
DPAGT1	-1.51031	4.9159	80.7122	2.61106e-19	2.61601e-17
HLF	-1.50984	2.21202	22.7902	1.80686e-06	1.76416e-05
EEF2K	-1.50915	4.2622	59.0596	1.52971e-14	8.11382e-13
BTN3A1	-1.50904	2.75469	39.4557	3.35578e-10	7.91397e-09
C15orf59.AS1	-1.5077	0.186923	6.73919	0.00943173	0.0273979
NA..71	-1.50768	2.30117	14.6173	0.000131698	0.000738405
MTFP1	-1.50608	4.24648	42.9412	5.64089e-11	1.5386e-09
CARM1	-1.50522	6.32601	102.247	4.90253e-24	8.84128e-22
DUSP12	-1.50409	3.84903	54.8861	1.27723e-13	5.69145e-12
KCTD15	-1.50395	3.73803	37.193	1.06995e-09	2.2685e-08
LONP1	-1.50312	4.65791	62.63	2.4943e-15	1.47058e-13
SUCLG2	-1.50171	5.26112	91.9947	8.69097e-22	1.17897e-19
TIMM9	-1.49601	5.16378	57.1647	4.00803e-14	1.94427e-12
AC018413.1	-1.49492	1.59201	10.3414	0.0013008	0.00519269
TSEN15	-1.49437	6.19833	22.4362	2.17241e-06	2.07741e-05
FOXP4.AS1	-1.48962	1.79166	17.4718	2.916e-05	0.000201077
AP001273.1	-1.4856	0.418729	8.4239	0.0037032	0.0126372
MTHFD2	-1.48154	8.09306	95.3229	1.61733e-22	2.33888e-20
AC019080.5	-1.47996	0.524149	9.07912	0.00258544	0.00931646
LINC01473	-1.47959	0.202464	5.49066	0.0191184	0.0489376
SLC38A1	-1.47763	7.75861	111.761	4.03014e-26	8.95333e-24
ARHGAP22	-1.47469	3.01901	32.5134	1.18374e-08	1.94694e-07
AL021368.2	-1.47457	0.867164	10.3537	0.00129214	0.00516754
FBXO17	-1.47375	4.78558	65.5791	5.58264e-16	3.67281e-14
AC073896.2	-1.4728	0.738502	8.46409	0.00362226	0.0124052
NA..6	-1.47275	5.75803	52.091	5.29865e-13	2.12071e-11
AL022342.1	-1.46732	0.589612	8.14271	0.00432346	0.0143918
SEMA4A	-1.46691	0.865556	10.5376	0.00116967	0.0047509
VEGFA	-1.46444	4.41282	49.4356	2.04989e-12	7.5856e-11
SDK2	-1.46083	4.54817	62.1937	3.11279e-15	1.80742e-13
AC026356.1	-1.4606	0.49822	8.30237	0.00395933	0.0133743
GALNT16	-1.45988	3.52972	34.5387	4.17856e-09	7.65271e-08
SLC1A4	-1.45945	3.73943	27.777	1.36135e-07	1.80364e-06
AC008622.2	-1.45897	1.41095	16.1466	5.86251e-05	0.000368456
FAM86DP	-1.45549	1.69512	15.0039	0.00010729	0.000619219
TMEM144	-1.45443	3.42051	40.9956	1.52571e-10	3.82775e-09
DEPTOR	-1.45405	2.0748	22.6327	1.96119e-06	1.89076e-05
AP003108.3	-1.44958	0.387387	7.7273	0.00543919	0.017432
MMS19	-1.44578	6.66627	91.5057	1.11273e-21	1.49623e-19
PTP4A3	-1.44575	2.40115	24.4333	7.69263e-07	8.23466e-06
XXYLT1	-1.44465	4.42107	73.1955	1.17426e-17	9.62577e-16
CLPSL2	-1.44374	1.71612	20.1141	7.29583e-06	6.02249e-05
MELTF	-1.44323	3.50213	29.7759	4.84986e-08	7.00033e-07
AP002360.4	-1.44206	0.389636	7.91247	0.00490953	0.0159818
SLC1A5	-1.44146	7.08081	116.815	3.15133e-27	7.92232e-25
AL133355.1	-1.44006	0.154857	5.65502	0.0174055	0.0453601
NGEF	-1.43769	3.14915	37.6423	8.49809e-10	1.82703e-08
C16orf74	-1.43764	2.65831	31.3274	2.17976e-08	3.41303e-07
HNRNPA1P48	-1.4362	3.48146	36.6327	1.4262e-09	2.90721e-08
STEAP1	-1.43539	2.90851	29.4375	5.7749e-08	8.22709e-07
INSIG1	-1.43522	7.46255	42.6352	6.59626e-11	1.77869e-09
TMEM218	-1.43159	3.95262	46.3064	1.01134e-11	3.18987e-10
ADGRB3	-1.43069	2.58605	18.7192	1.51448e-05	0.000114137
KCNB2	-1.42991	1.98295	22.5294	2.06957e-06	1.98775e-05
JDP2	-1.42972	3.46178	20.3661	6.39531e-06	5.36877e-05
DHPS	-1.42667	4.24843	45.3294	1.66529e-11	5.04491e-10
AC093227.1	-1.42146	0.728236	5.80474	0.015983	0.0424543
GDF10	-1.4187	0.606734	7.51004	0.0061356	0.0192022
PRKCQ.AS1	-1.41863	2.51715	30.2827	3.73439e-08	5.52553e-07
CA12	-1.41781	2.70293	25.6118	4.17473e-07	4.84073e-06
LINC00629	-1.41754	0.396048	7.1671	0.00742527	0.0224694
LRIG3	-1.41684	3.72453	24.7785	6.43094e-07	7.06666e-06
SH3YL1	-1.41641	2.82759	30.5247	3.29648e-08	4.92513e-07
PROB1	-1.41612	1.48515	15.2252	9.54214e-05	0.000560427
ARPIN	-1.4158	4.94503	64.2682	1.08583e-15	6.87795e-14
VPS28	-1.41541	5.03598	31.2425	2.27722e-08	3.54751e-07
GAS6	-1.41399	2.17687	15.4177	8.61796e-05	0.000515039
SMYD5	-1.4136	2.3188	26.4549	2.69763e-07	3.29236e-06
SNHG7	-1.41355	5.9451	83.1526	7.59569e-20	8.1996e-18
DPP7	-1.4119	0.711436	6.83903	0.00891873	0.0261656
MACROD1	-1.40774	2.8725	36.5333	1.50079e-09	3.03504e-08
AL731563.3	-1.40677	0.386206	6.4135	0.0113256	0.0319164
MIR222HG	-1.40329	2.21183	15.6916	7.45553e-05	0.000456413
AC018648.1	-1.40258	0.846068	9.33365	0.00224984	0.00828437
SOX12	-1.39929	5.89684	96.5658	8.6326e-23	1.29734e-20
SCRN2	-1.39821	3.81288	50.9728	9.36566e-13	3.61628e-11
FGF7P3	-1.3976	0.134839	5.51946	0.018806	0.0483363
NRTN	-1.39437	1.72293	19.7247	8.94402e-06	7.18134e-05
PODXL2	-1.39322	3.3893	34.3861	4.51944e-09	8.17928e-08
AL359232.1	-1.3922	0.562717	6.61898	0.0100898	0.0290234
COMTD1	-1.39217	4.67641	60.1387	8.84052e-15	4.91001e-13
VEGFC	-1.39114	0.841922	10.2098	0.00139695	0.00552903
AL138762.1	-1.38994	2.47646	26.0996	3.2425e-07	3.88922e-06
MCM3AP.AS1	-1.38962	3.31759	44.3747	2.71174e-11	7.8283e-10
ANO7	-1.3891	1.2716	13.0564	0.000302246	0.00150832
DERL3	-1.38833	1.76738	19.7768	8.70336e-06	7.02548e-05
AF111167.2	-1.38831	0.245053	6.28401	0.0121832	0.0338692
LRP8	-1.38688	3.67412	33.9321	5.70693e-09	1.01135e-07
NA..228	-1.38437	0.54973	7.32945	0.00678339	0.0208758
PTGES	-1.38423	1.56949	12.6367	0.000378244	0.0018279
EXOSC8	-1.38376	5.88255	66.5402	3.42831e-16	2.35662e-14
SEPT04	-1.38359	1.24452	12.8191	0.00034309	0.00168188
YARS	-1.38238	7.36281	83.5261	6.28791e-20	6.83599e-18
CNNM1	-1.3804	3.23219	36.3526	1.64655e-09	3.308e-08
TRDMT1	-1.3793	3.24105	34.675	3.89609e-09	7.16965e-08
CES3	-1.37653	2.15889	22.0796	2.61574e-06	2.43158e-05
NPM3	-1.37542	7.10549	102.672	3.95488e-24	7.39322e-22
BACE2	-1.37529	5.40736	84.5062	3.83012e-20	4.31705e-18
OGFOD3	-1.37504	4.48498	49.1921	2.32085e-12	8.33742e-11
JMJD8	-1.37408	5.5503	64.23	1.10711e-15	6.95529e-14
H6PD	-1.37395	3.537	44.4928	2.55291e-11	7.41166e-10
CALML4	-1.37351	1.26069	11.7806	0.000598519	0.00270082
CR2	-1.37188	0.971026	11.1077	0.000859707	0.00367907
ZNF496	-1.36892	2.69602	30.7676	2.90858e-08	4.41005e-07
AL356019.2	-1.36854	1.09074	6.2282	0.0125732	0.0347707
NA..2395	-1.36783	1.34408	14.423	0.000146011	0.000808099
TMEM231	-1.36706	3.02078	33.0688	8.89561e-09	1.50842e-07
NOB1	-1.367	6.1325	84.731	3.41848e-20	3.91059e-18
DHRS4.AS1	-1.36677	4.02531	48.5426	3.23189e-12	1.13368e-10
FAM86EP	-1.36652	1.34637	8.7119	0.0031614	0.0110876
ENO4	-1.36497	0.398639	5.46569	0.0193934	0.0495057
C16orf62	-1.36252	4.04843	54.9735	1.22165e-13	5.47564e-12
AC009570.1	-1.36229	0.957904	11.8528	0.000575739	0.00261264
C1orf159	-1.36024	1.89735	17.0398	3.66051e-05	0.000244071
TRIM47	-1.35904	2.03733	21.7459	3.11257e-06	2.83329e-05
ANKH	-1.35855	4.14635	43.8059	3.62605e-11	1.01616e-09
PHC1	-1.3581	3.27382	36.4052	1.60276e-09	3.22424e-08
PORCN	-1.35741	2.67933	26.4066	2.7659e-07	3.36763e-06
ST3GAL1	-1.3572	3.31341	30.0361	4.24076e-08	6.1911e-07
AC073508.3	-1.35659	0.559172	7.01061	0.0081028	0.0241743
ILVBL	-1.34808	4.20172	53.0847	3.19467e-13	1.33801e-11
DTNB	-1.34709	3.40631	37.7956	7.85572e-10	1.70085e-08
PYROXD1	-1.34679	3.90951	34.4251	4.42974e-09	8.06455e-08
CDKL1	-1.34499	1.42804	14.8573	0.00011596	0.000663264
ECI1	-1.34428	6.07528	57.4252	3.51088e-14	1.72495e-12
CD302	-1.34356	3.90083	41.4657	1.19956e-10	3.08008e-09
IRS1	-1.34305	1.65975	16.9063	3.92716e-05	0.000259145
DPM3	-1.3422	6.08333	61.8846	3.64188e-15	2.09874e-13
TANGO6	-1.34212	3.08731	33.8459	5.96534e-09	1.05106e-07
ATP5G2	-1.33972	8.1238	100.263	1.33415e-23	2.24738e-21
SLC38A2	-1.33912	7.5667	88.0567	6.36044e-21	7.99174e-19
SLC29A1	-1.33722	5.66555	81.9065	1.42681e-19	1.47781e-17
CCDC107	-1.33669	2.0033	15.2745	9.29613e-05	0.000548322
C11orf49	-1.33648	3.91407	32.4928	1.19633e-08	1.96555e-07
AC023024.2	-1.33375	0.61457	5.47453	0.0192956	0.0493199
AL358472.2	-1.33332	0.71827	8.63049	0.00330583	0.0114857
RPL5P11	-1.33251	0.337698	6.09625	0.0135469	0.0370161
AL513477.2	-1.33108	0.344058	5.4743	0.0192981	0.0493199
FGFR4	-1.33021	2.12932	22.1792	2.48346e-06	2.31986e-05
SCD	-1.32875	8.7338	90.4735	1.87472e-21	2.49892e-19
GREB1	-1.3276	3.14528	36.6294	1.42857e-09	2.90818e-08
CSPG5	-1.32636	4.13312	29.9747	4.37728e-08	6.38433e-07
C16orf58	-1.32617	3.93995	39.3705	3.50553e-10	8.21656e-09
TTLL1	-1.32587	2.36557	19.234	1.15633e-05	9.01597e-05
EPB41L4A.AS1	-1.32514	6.23578	46.344	9.9212e-12	3.14696e-10
G0S2	-1.32448	3.62023	15.804	7.02537e-05	0.000433542
COMT	-1.32438	6.81493	30.0993	4.10485e-08	6.01561e-07
SYBU	-1.3225	3.20138	33.5999	6.76973e-09	1.17391e-07
DGAT1	-1.32233	2.99114	28.0493	1.18262e-07	1.58823e-06
SARS2	-1.31909	3.06915	33.6842	6.4824e-09	1.13047e-07
NA..4400	-1.31739	0.749884	6.25311	0.0123975	0.0343594
GAS5	-1.31728	7.0971	61.6076	4.19207e-15	2.38886e-13
LPAR3	-1.31679	5.21087	63.7342	1.42389e-15	8.80116e-14
ULBP1	-1.31677	3.03078	20.8921	4.85893e-06	4.21759e-05
HIST1H1C	-1.31431	8.39402	103.353	2.80394e-24	5.37269e-22
LHFPL4	-1.31343	3.07386	31.7725	1.73328e-08	2.75331e-07
C6orf48	-1.31288	6.99005	52.6738	3.93816e-13	1.6228e-11
KAT5	-1.31155	4.79353	49.9846	1.54959e-12	5.83627e-11
SEC63P1	-1.31099	0.941552	6.92148	0.00851666	0.0251497
BTN3A2	-1.30987	3.84484	46.5047	9.13975e-12	2.95577e-10
AP001486.2	-1.30969	2.48601	13.5477	0.000232574	0.0012077
FAM189A1	-1.30856	1.11075	11.2249	0.000807069	0.00348102
MRPL24	-1.3079	5.92534	71.6516	2.5676e-17	2.0081e-15
TMEM267	-1.30749	3.5305	35.6865	2.31765e-09	4.48749e-08
AUH	-1.30643	3.61541	35.1192	3.10128e-09	5.83306e-08
LIG1	-1.30335	4.87353	56.0971	6.89786e-14	3.20416e-12
TMEM39B	-1.30296	4.70931	50.8386	1.0028e-12	3.86229e-11
THG1L	-1.30249	4.56822	63.1857	1.88107e-15	1.13972e-13
AC126474.2	-1.3019	2.82927	25.665	4.06128e-07	4.71989e-06
TBXAS1	-1.30165	1.97945	17.5963	2.7312e-05	0.000189603
RPL31P2	-1.30153	0.608081	7.43043	0.00641301	0.019924
AC026403.1	-1.30069	1.1708	10.7342	0.00105172	0.00436077
NHSL1	-1.30054	4.13904	31.1326	2.40988e-08	3.73142e-07
SLC19A1	-1.29994	4.73865	52.3702	4.59652e-13	1.8591e-11
VPS9D1.AS1	-1.29847	3.59263	34.5663	4.11968e-09	7.5539e-08
CCDC74B	-1.29776	1.82564	18.3646	1.82418e-05	0.000133411
RAD51D	-1.29758	3.85228	45.6474	1.41576e-11	4.35786e-10
ADCY1	-1.29744	4.288	49.7076	1.78458e-12	6.67214e-11
SUPT3H	-1.29732	3.8475	40.0762	2.44241e-10	5.90532e-09
AC004801.6	-1.29624	0.499577	6.0445	0.0139497	0.0379516
C3orf80	-1.29582	1.8218	18.9098	1.37048e-05	0.000104414
B4GALNT3	-1.29319	1.83959	16.8697	4.00349e-05	0.000263502
ABCB10	-1.29266	4.33663	24.6654	6.81972e-07	7.45646e-06
ZNF704	-1.29187	5.13611	42.4563	7.22805e-11	1.92359e-09
ADRA2C	-1.28816	4.29653	37.0835	1.13178e-09	2.39627e-08
RPL21P116	-1.28671	0.407739	6.30366	0.0120489	0.0335692
UBXN6	-1.28481	5.16522	55.5463	9.12856e-14	4.16463e-12
GRIP2	-1.28366	0.418984	5.98185	0.0144538	0.0390625
NA..4420	-1.28138	1.69287	11.665	0.000636886	0.00284547
IGDCC3	-1.27824	4.19742	46.4965	9.17831e-12	2.96198e-10
LRRC20	-1.27535	2.64357	19.3384	1.09483e-05	8.58007e-05
PLGRKT	-1.27524	2.50096	25.8064	3.77436e-07	4.42672e-06
HIST1H4H	-1.27466	1.7967	9.39359	0.00217746	0.00805071
RHBDD1	-1.2739	3.74349	36.6993	1.37826e-09	2.83209e-08
TSPAN7	-1.27164	4.54856	44.1638	3.02012e-11	8.62112e-10
FAM216A	-1.27079	6.17137	82.4769	1.06911e-19	1.13023e-17
THOC6	-1.27016	1.96437	8.45638	0.00363765	0.0124496
AL359752.1	-1.26752	0.493839	6.38368	0.0115174	0.0323353
PRIMA1	-1.26578	1.63977	12.5231	0.000401948	0.00192125
MRPS34	-1.26294	6.403	83.9293	5.1279e-20	5.65508e-18
ALKAL1	-1.26133	2.18164	10.8077	0.0010108	0.0042231
XBP1	-1.26072	7.05702	48.5014	3.30052e-12	1.15511e-10
SNTA1	-1.25951	3.12193	23.3912	1.32185e-06	1.33131e-05
AL008723.3	-1.25932	0.603668	6.01428	0.0141906	0.0384595
AC091133.1	-1.25908	0.728508	7.31049	0.00685531	0.0210549
CAMKV	-1.25902	1.84008	11.7769	0.000599695	0.00270374
KCNC1	-1.25893	2.29751	21.801	3.02447e-06	2.758e-05
TSPAN18	-1.25868	3.5965	37.0675	1.14111e-09	2.41271e-08
CDC42EP1	-1.25759	4.63892	32.686	1.08315e-08	1.79888e-07
AC008608.2	-1.25581	0.656962	7.46068	0.00630611	0.0196476
DPH5	-1.25567	5.78433	73.9524	8.0023e-18	6.70313e-16
AC019069.1	-1.25414	2.35577	19.79	8.64316e-06	6.98792e-05
TMEM52	-1.25286	0.890478	8.09354	0.00444233	0.0147395
AP000487.1	-1.25	0.387581	5.7895	0.0161222	0.0427203
MAPT	-1.24843	4.73368	45.7359	1.35318e-11	4.19049e-10
SREBF1	-1.24677	3.24639	30.7563	2.92556e-08	4.43142e-07
GNG4	-1.24616	5.14836	58.0911	2.50262e-14	1.26312e-12
NA..4396	-1.24521	1.09074	10.6638	0.00109255	0.00449484
NA..2	-1.24519	2.54272	21.351	3.82424e-06	3.40231e-05
IARS	-1.24418	6.57059	60.1109	8.96594e-15	4.94385e-13
GALNT13	-1.24176	4.06154	36.2859	1.70388e-09	3.41174e-08
NLE1	-1.24165	3.25646	28.5281	9.23507e-08	1.2651e-06
EXOC1L	-1.2407	0.740585	8.03436	0.00458981	0.0151306
C12orf66	-1.24055	2.94543	24.8793	6.10345e-07	6.75034e-06
CDCA7	-1.23982	6.23957	71.4837	2.79559e-17	2.17531e-15
AL591895.1	-1.2387	3.31513	24.3892	7.87067e-07	8.39593e-06
TMC6	-1.23845	2.52888	21.197	4.14413e-06	3.65088e-05
LRP11	-1.23451	5.53566	58.8057	1.74039e-14	9.16787e-13
CHCHD6	-1.23429	4.0273	32.0583	1.49618e-08	2.41421e-07
LINC01158	-1.2323	2.62177	13.045	0.000304091	0.00151541
NA..147	-1.23132	3.16442	22.6562	1.93734e-06	1.87011e-05
GARS	-1.22916	6.90342	63.0402	2.02529e-15	1.22227e-13
PLLP	-1.22872	2.4527	14.294	0.000156364	0.000857263
AC124016.2	-1.22827	1.29627	11.5882	0.000663704	0.00294129
FAM155B	-1.227	3.50125	28.3277	1.0242e-07	1.38962e-06
DHX35	-1.22633	2.71351	18.6278	1.58888e-05	0.000118926
RASGRP1	-1.22587	0.740038	6.61413	0.0101173	0.0290917
KIAA1549	-1.22534	4.32655	39.937	2.62288e-10	6.30189e-09
TOP1MT	-1.22445	4.54191	43.5476	4.13763e-11	1.14902e-09
TRIM65	-1.22436	4.70825	46.4299	9.4953e-12	3.04505e-10
HDDC3	-1.22389	4.88827	62.2698	2.9949e-15	1.74558e-13
EIF2S2P4	-1.22372	0.863683	7.73607	0.00541284	0.0173588
THEM6	-1.22321	4.66004	45.1518	1.82341e-11	5.50217e-10
PKN3	-1.22308	3.52594	37.9869	7.12224e-10	1.55523e-08
Z93930.2	-1.22252	0.944383	8.77634	0.00305163	0.0107512
WNT10B	-1.22248	2.23117	12.3436	0.000442512	0.00208268
XPOT	-1.22247	5.53081	52.5521	4.18978e-13	1.70811e-11
AL138976.2	-1.22241	1.00546	9.82408	0.00172242	0.00662725
MOCOS	-1.22186	4.82631	50.6719	1.09172e-12	4.18376e-11
FAHD2CP	-1.22065	1.63842	10.646	0.00110309	0.00453087
SLC35A1	-1.21823	4.15427	38.2586	6.19638e-10	1.36865e-08
ERMARD	-1.21693	3.53472	30.2041	3.8889e-08	5.73753e-07
PIGU	-1.21644	3.49607	35.552	2.48326e-09	4.78816e-08
GRIK4	-1.21573	0.528242	5.69478	0.0170154	0.0445025
AC015961.2	-1.21557	0.444593	5.46521	0.0193987	0.0495109
DNPH1	-1.21422	7.94721	83.5673	6.15838e-20	6.74298e-18
CDH1	-1.21331	2.26729	16.1198	5.94597e-05	0.000372328
SLC47A1	-1.2123	4.10195	45.4733	1.54733e-11	4.71552e-10
MLST8	-1.2123	4.20597	32.7962	1.02346e-08	1.70715e-07
VPS51	-1.21066	4.6289	46.8868	7.52063e-12	2.46333e-10
SCMH1	-1.20977	3.288	30.5823	3.19994e-08	4.79603e-07
PXN.AS1	-1.20844	2.24794	15.4584	8.43417e-05	0.000505424
SLC16A7	-1.20781	3.00979	21.0321	4.51662e-06	3.94748e-05
NA..3553	-1.2073	2.38288	18.9831	1.31884e-05	0.000101233
GALNT6	-1.20699	4.11745	34.6482	3.94999e-09	7.26012e-08
SUMF2	-1.20696	5.63841	68.1419	1.52143e-16	1.10531e-14
SLC39A10	-1.20577	7.0322	70.4466	4.72894e-17	3.57094e-15
SORL1	-1.20515	3.53298	29.4654	5.69247e-08	8.13233e-07
NFE2L3	-1.20461	3.83088	26.8663	2.1803e-07	2.74399e-06
EPHB1	-1.20431	3.1784	30.4585	3.41091e-08	5.08617e-07
CRISPLD1	-1.20344	4.97863	46.4343	9.47439e-12	3.04471e-10
TMEM268	-1.20214	4.01649	36.9142	1.23442e-09	2.58503e-08
CCDC74A	-1.20207	2.36241	22.4147	2.19684e-06	2.09685e-05
SLITRK5	-1.20155	5.06311	49.6466	1.84089e-12	6.86592e-11
ADCY3	-1.20136	4.21404	40.8511	1.64282e-10	4.08811e-09
KIF6	-1.19741	1.01425	8.50973	0.00353252	0.012144
ITPR3	-1.19669	3.47587	35.158	3.0401e-09	5.73913e-08
DTX4	-1.19577	1.24609	6.59312	0.0102374	0.0293929
NA..4469	-1.19527	1.57447	13.4383	0.000246539	0.00126768
DGCR5	-1.19473	2.38436	21.0762	4.41367e-06	3.86612e-05
C15orf61	-1.19451	5.60469	58.4442	2.09137e-14	1.07897e-12
NKX2.8	-1.19309	1.96407	15.1811	9.76739e-05	0.000571685
UQCC3	-1.19305	4.43923	44.6502	2.35573e-11	6.95779e-10
ERLIN1	-1.1921	5.89341	58.7885	1.75568e-14	9.21674e-13
CYP2S1	-1.19183	1.26386	8.01351	0.00464296	0.0152959
KDELC2	-1.19123	5.05783	17.1805	3.39907e-05	0.000228428
FBXW4	-1.19114	3.29186	24.6092	7.02171e-07	7.63374e-06
TBL1X	-1.19074	6.57339	80.0422	3.66497e-19	3.60131e-17
DYRK4	-1.19044	4.39229	39.4422	3.37911e-10	7.94454e-09
OMA1	-1.18879	4.86964	37.3007	1.01247e-09	2.15557e-08
SBF2.AS1	-1.18725	2.54212	22.2994	2.33276e-06	2.20211e-05
SNHG1	-1.18631	7.53663	30.5819	3.20069e-08	4.79603e-07
BACE1.AS	-1.18568	1.59196	9.07184	0.00259576	0.00934926
WDR18	-1.18515	5.09195	49.3935	2.09434e-12	7.71735e-11
B4GALT3	-1.18422	5.74965	71.2371	3.16769e-17	2.4158e-15
HAGHL	-1.18381	1.65922	8.01129	0.00464866	0.0153015
ADCY7	-1.1828	2.73993	20.0462	7.55942e-06	6.21029e-05
AC010913.1	-1.18272	0.542203	6.60612	0.0101629	0.0292009
TMIE	-1.18214	1.30027	9.8118	0.00173396	0.00666327
NA..4464	-1.18078	0.788024	7.82806	0.00514413	0.0166254
MYDGF	-1.17912	5.67644	55.316	1.02632e-13	4.62721e-12
SPTBN2	-1.17843	3.45926	26.9751	2.06089e-07	2.6044e-06
CASC2	-1.17741	2.82867	22.7197	1.87437e-06	1.8185e-05
TMEM101	-1.17705	5.49045	52.322	4.71079e-13	1.90031e-11
AGA	-1.17615	5.3327	48.4503	3.38773e-12	1.18024e-10
SECISBP2	-1.17607	5.74369	69.7633	6.68645e-17	4.95153e-15
EDA	-1.17302	3.70237	37.735	8.10378e-10	1.74774e-08
MIR210HG	-1.17152	0.97151	6.08643	0.0136224	0.0371953
NA..73	-1.17142	3.34998	28.8939	7.6455e-08	1.06938e-06
SERGEF	-1.1709	3.33828	27.1773	1.85626e-07	2.37518e-06
GRHPR	-1.17037	6.01276	65.6606	5.35664e-16	3.55463e-14
SOCS2.AS1	-1.16875	0.939887	6.83038	0.00896202	0.0262674
C17orf75	-1.1673	4.62674	29.0932	6.89799e-08	9.69195e-07
SNRPA	-1.16645	5.91103	46.9388	7.32378e-12	2.40915e-10
RPL13AP20	-1.16532	0.608484	6.37166	0.0115957	0.0325192
ADAMTS2	-1.16451	3.37738	24.9802	5.79211e-07	6.46098e-06
TMEM44	-1.16446	0.780271	6.80934	0.00906823	0.0265027
GAA	-1.16394	4.59629	33.6018	6.76308e-09	1.17391e-07
H2AFY2	-1.16121	5.9063	43.897	3.46113e-11	9.73499e-10
TMEM158	-1.16113	4.99674	41.6389	1.09788e-10	2.83322e-09
TUBGCP3	-1.1605	4.66878	36.6444	1.41765e-09	2.89362e-08
PLEKHG4	-1.16007	4.42611	35.5365	2.50317e-09	4.81444e-08
TMEM42	-1.15971	4.17835	42.6334	6.60237e-11	1.77869e-09
TUBE1	-1.15843	4.05835	39.3848	3.48e-10	8.1692e-09
GALNT12	-1.15691	3.01112	25.1789	5.22508e-07	5.90238e-06
SCAP	-1.15506	5.99668	66.8582	2.91761e-16	2.01459e-14
TKT	-1.15433	8.48863	56.9657	4.43476e-14	2.13775e-12
MOB3B	-1.1542	3.59797	30.854	2.78192e-08	4.2559e-07
UCN	-1.15379	1.84972	9.28494	0.00231046	0.00847007
ALKBH2	-1.15372	4.90044	48.0658	4.12156e-12	1.41658e-10
AC097658.1	-1.15158	2.98756	22.9631	1.65144e-06	1.62692e-05
CDPF1	-1.15089	2.60032	17.2972	3.19665e-05	0.000217398
ALDH1B1	-1.15064	4.51145	46.1733	1.08242e-11	3.40008e-10
FSD1	-1.14953	3.03435	25.5866	4.22961e-07	4.90066e-06
TMEM171	-1.1488	2.22455	14.7768	0.000121015	0.000687307
ADA	-1.14834	3.93216	29.7503	4.9144e-08	7.08681e-07
NLGN1	-1.14798	3.97707	29.2318	6.42165e-08	9.07257e-07
AL031985.3	-1.14498	0.769	7.13165	0.00757349	0.0228307
EIF1	-1.14481	9.55697	56.4519	5.75901e-14	2.73312e-12
B3GNT4	-1.14365	1.47894	11.6686	0.000635652	0.00284239
SLC18B1	-1.1436	5.22848	47.647	5.10314e-12	1.72684e-10
PEX11G	-1.14334	1.89413	10.2766	0.0013473	0.005356
FDXACB1	-1.14272	1.68369	13.9202	0.000190741	0.00101806
VWA8	-1.1425	4.17288	31.6389	1.8567e-08	2.93718e-07
Z99129.4	-1.14164	3.55208	27.7214	1.40104e-07	1.85302e-06
ASPH	-1.14144	7.0827	67.5724	2.03088e-16	1.43462e-14
EGFL7	-1.14064	3.01868	22.2571	2.3848e-06	2.24491e-05
FBXO4	-1.14054	4.00519	24.6507	6.87187e-07	7.49986e-06
CPSF4	-1.1404	4.70289	36.9349	1.22138e-09	2.56123e-08
SLC9A9	-1.14004	2.1745	14.3984	0.000147929	0.000817451
KCNJ8	-1.13982	3.30802	31.3102	2.19921e-08	3.43997e-07
EMID1	-1.13879	1.18061	8.50348	0.00354469	0.0121749
BARX1	-1.13857	1.03739	7.5191	0.00610483	0.0191294
SPACA9	-1.13352	2.67589	16.2064	5.68007e-05	0.00035846
YIF1A	-1.13195	6.06729	76.2095	2.55107e-18	2.2219e-16
TTC39B	-1.13051	2.88636	23.8257	1.05467e-06	1.08358e-05
DTD1	-1.12985	5.29374	33.9664	5.60715e-09	9.95968e-08
TMEM108	-1.12858	3.21328	24.5807	7.12624e-07	7.73093e-06
AC093297.2	-1.12731	2.09134	14.8773	0.000114738	0.000657502
TMEM160	-1.12731	3.1776	22.3803	2.23661e-06	2.12818e-05
EML2	-1.12719	5.40693	42.4383	7.29491e-11	1.93802e-09
TMEM18	-1.12712	6.91622	63.2647	1.80711e-15	1.10805e-13
RPS6KA6	-1.1262	3.11808	25.3365	4.81502e-07	5.48362e-06
C3orf33	-1.12575	3.81571	28.8629	7.76872e-08	1.0842e-06
IAH1	-1.12568	5.09261	45.4444	1.57035e-11	4.76671e-10
CHID1	-1.12414	5.44827	44.5359	2.49732e-11	7.26402e-10
ANP32B	-1.12315	8.73277	65.6038	5.51332e-16	3.64283e-14
COL26A1	-1.12275	1.908	10.4823	0.0012052	0.0048707
TUBBP5	-1.12242	3.57328	26.649	2.43982e-07	3.02589e-06
COL13A1	-1.12174	3.16981	28.441	9.66e-08	1.31742e-06
LRFN4	-1.1209	3.09572	25.2563	5.01941e-07	5.70367e-06
LSM11	-1.11964	4.64667	38.5254	5.40467e-10	1.20946e-08
MECR	-1.11938	4.68148	32.3841	1.26516e-08	2.07419e-07
AMOT	-1.11938	7.80261	77.784	1.1495e-18	1.06149e-16
NSMCE1	-1.11931	4.4942	30.7268	2.9703e-08	4.48147e-07
ZNRD1	-1.11903	4.40701	40.3827	2.08779e-10	5.12059e-09
CTSH	-1.11879	5.40452	54.7551	1.36524e-13	6.04847e-12
KIAA1024	-1.11798	1.34429	7.37017	0.00663146	0.0204864
KATNB1	-1.11798	3.99436	34.518	4.22317e-09	7.72518e-08
WARS2	-1.1167	5.6296	56.4332	5.81411e-14	2.74229e-12
UTP20	-1.11632	5.03031	38.8042	4.68531e-10	1.06087e-08
MRC2	-1.11572	3.72912	21.3438	3.83867e-06	3.41119e-05
SREBF2	-1.11477	5.56133	58.2074	2.35891e-14	1.19734e-12
DUS3L	-1.11417	2.14469	14.5836	0.000134079	0.000749012
MRPL38	-1.11398	3.6268	27.5352	1.54263e-07	2.02457e-06
WDYHV1	-1.11301	2.12442	9.92233	0.00163286	0.00631434
DAAM2	-1.11236	2.48857	16.8421	4.06221e-05	0.000267137
C19orf48	-1.11135	5.42859	33.0787	8.85034e-09	1.5024e-07
HDAC6	-1.11102	4.43309	34.612	4.02415e-09	7.38757e-08
KCNT2	-1.11032	1.1994	6.67734	0.00976462	0.0282312
PKDCC	-1.11025	2.59905	10.6072	0.00112646	0.00460959
MRPS27	-1.11015	6.46679	58.0091	2.60904e-14	1.31128e-12
GALNT14	-1.108	1.05251	7.72294	0.00545234	0.0174596
GPR160	-1.10783	3.91058	29.6974	5.05018e-08	7.27577e-07
EIF2A	-1.10636	6.91359	69.6006	7.26141e-17	5.35145e-15
TMEM80	-1.10634	4.76959	35.813	2.17192e-09	4.2358e-08
NA..2798	-1.10475	2.16014	13.8772	0.000195155	0.00103765
TRAP1	-1.1042	6.42731	65.3542	6.25762e-16	4.04739e-14
GPX8	-1.10365	5.59826	54.0779	1.92701e-13	8.3918e-12
AC116614.1	-1.10294	1.89927	12.7893	0.000348599	0.0017067
HK2	-1.10225	3.55251	16.1047	5.99351e-05	0.000374845
DAPK2	-1.1013	0.670064	5.91456	0.0150163	0.0402843
COQ3	-1.10118	4.93086	42.6007	6.71352e-11	1.8047e-09
TOR2A	-1.10097	3.42144	23.0894	1.54639e-06	1.53032e-05
FAM171A1	-1.09983	6.23833	66.1789	4.11793e-16	2.76858e-14
CRTAP	-1.09972	6.677	43.4266	4.40173e-11	1.21795e-09
AC107956.1	-1.0987	1.30061	7.97343	0.0047469	0.0155721
FBLN2	-1.0985	0.94899	7.38924	0.00656153	0.0203072
NHLRC2	-1.09741	5.83769	58.0892	2.50497e-14	1.26312e-12
AC004803.1	-1.09711	1.39743	7.85694	0.0050626	0.0163827
SYNGR3	-1.0966	3.11424	23.1326	1.51208e-06	1.50299e-05
SHANK2	-1.0938	1.05141	8.4879	0.00357517	0.0122686
DIS3L	-1.09292	4.71223	38.2206	6.31818e-10	1.39154e-08
PTPN18	-1.09211	4.18556	36.4753	1.54614e-09	3.11852e-08
GTPBP3	-1.09205	4.82975	46.9763	7.18507e-12	2.37699e-10
CCNB1IP1	-1.09173	6.07849	42.5583	6.86071e-11	1.83489e-09
SLC35B4	-1.09064	6.33839	66.2315	4.00944e-16	2.7195e-14
AC138904.1	-1.08974	2.43761	9.69819	0.0018445	0.00699859
HMBS	-1.08761	4.44202	34.8236	3.60974e-09	6.67924e-08
MARS	-1.08513	6.68757	48.643	3.07056e-12	1.08204e-10
F2R	-1.08505	4.54717	44.6414	2.36637e-11	6.97578e-10
BCL6B	-1.08433	2.30796	14.6781	0.000127519	0.000718654
KCNRG	-1.08422	1.28305	7.71658	0.00547159	0.0175066
AMER1	-1.08366	3.20258	25.5198	4.37857e-07	5.04846e-06
RNF144A	-1.08359	2.91721	19.1485	1.20935e-05	9.34851e-05
TRMT1	-1.08118	3.57626	22.7248	1.86938e-06	1.8148e-05
SOSTDC1	-1.08085	0.807184	6.41367	0.0113245	0.0319164
PTGES2	-1.07937	4.46943	36.6701	1.39906e-09	2.8614e-08
NA..2530	-1.0789	4.35353	38.3773	5.83063e-10	1.29346e-08
POGLUT1	-1.07864	5.13105	50.7605	1.04354e-12	4.00911e-11
SLC11A2	-1.0786	5.61098	61.0834	5.47068e-15	3.06059e-13
ADAP1	-1.07727	1.84581	9.05893	0.00261415	0.00941107
RSL24D1	-1.07723	6.54596	54.5101	1.5465e-13	6.83177e-12
ANK2	-1.0765	4.07623	25.1596	5.27773e-07	5.95289e-06
LINC01703	-1.07472	1.15506	8.29317	0.00397945	0.0134364
NSMCE4A	-1.07395	5.77734	59.1409	1.46777e-14	7.86696e-13
TMEM209	-1.0709	5.29812	35.1379	3.0717e-09	5.79164e-08
CTDSP1	-1.07066	4.7327	44.9114	2.06159e-11	6.16024e-10
GALK1	-1.07041	4.14371	31.2927	2.21912e-08	3.46403e-07
AC098935.1	-1.07	0.847328	5.9996	0.0143092	0.0387467
LYRM4	-1.06841	4.66471	36.895	1.24668e-09	2.60005e-08
SH2D5	-1.06726	1.71052	9.44396	0.00211845	0.00785553
EEF1G	-1.06563	2.14041	9.15745	0.00247707	0.00897449
ESX1	-1.06559	1.10171	5.54537	0.0185297	0.04773
LOXL3	-1.06527	1.39002	7.69767	0.00552921	0.0176614
LAMA1	-1.06521	3.01202	23.9318	9.98079e-07	1.03445e-05
TMEM134	-1.0651	3.92055	23.4088	1.30979e-06	1.32198e-05
NA..4632	-1.06463	1.04352	7.39911	0.00652563	0.0202206
FNDC10	-1.0641	3.44775	20.5251	5.88552e-06	4.97624e-05
NUDT2	-1.06293	4.01472	30.0721	4.16283e-08	6.08893e-07
MID1	-1.06128	6.50781	64.4447	9.92814e-16	6.31487e-14
WDR19	-1.06053	3.6006	23.1291	1.51481e-06	1.50327e-05
PCGF1	-1.06048	2.82133	17.7309	2.54465e-05	0.000178279
ACVR2B	-1.06031	6.09313	30.8035	2.85518e-08	4.34704e-07
LRRC8D	-1.05983	4.99209	35.3989	2.68634e-09	5.14094e-08
DHDH	-1.0588	0.84106	6.61529	0.0101107	0.0290781
C17orf49	-1.05853	2.15544	11.864	0.0005723	0.00259857
PGAP3	-1.05841	1.77398	10.8726	0.000975979	0.00410785
TCTN2	-1.05803	3.02334	18.6163	1.59844e-05	0.000119408
ATRAID	-1.05661	6.18932	53.6202	2.43248e-13	1.03576e-11
AC093157.1	-1.05479	3.29707	16.6984	4.38178e-05	0.000285945
WDR41	-1.05376	5.72016	57.7179	3.0253e-14	1.5008e-12
ALKBH7	-1.05257	3.66677	24.8586	6.1694e-07	6.81345e-06
POMT2	-1.05254	4.48187	40.9265	1.58063e-10	3.95261e-09
AC079414.3	-1.05196	1.87115	11.0662	0.000879154	0.00374141
TMEM47	-1.05122	5.16585	39.8877	2.68997e-10	6.44291e-09
HHIP	-1.05067	3.23107	10.5885	0.00113792	0.00464617
AGPAT4	-1.05061	4.29188	33.8564	5.93328e-09	1.04782e-07
MDM4	-1.05058	6.06866	49.3812	2.10756e-12	7.74741e-11
CTU2	-1.04907	3.21391	19.4958	1.00823e-05	7.97476e-05
NUDT3	-1.04878	6.91827	57.5511	3.29317e-14	1.62842e-12
CEBPA.AS1	-1.04859	1.40378	8.15985	0.0042828	0.0142968
PDK1	-1.04833	4.51633	35.2867	2.84573e-09	5.41891e-08
AL596202.1	-1.04791	1.1855	6.86477	0.00879115	0.0258397
P4HA1	-1.04758	6.74078	64.249	1.09647e-15	6.91681e-14
AC073861.1	-1.04738	2.78531	18.4259	1.76641e-05	0.000129743
TMEM17	-1.04698	2.07765	9.22844	0.00238285	0.00869061
TMED1	-1.04532	4.40423	30.8742	2.75311e-08	4.21603e-07
SNHG3	-1.04482	5.63443	53.5043	2.58023e-13	1.0926e-11
PIGF	-1.04388	3.57342	19.9075	8.12814e-06	6.62746e-05
MCRIP1	-1.04364	5.75817	44.3488	2.74777e-11	7.90254e-10
SLC25A6	-1.04133	8.1997	37.0222	1.16792e-09	2.46259e-08
MIF4GD	-1.04123	4.72881	32.9256	9.57539e-09	1.61475e-07
NA..151	-1.04083	4.41828	32.3101	1.31426e-08	2.14551e-07
FZD2	-1.0401	3.43711	20.2238	6.88917e-06	5.73001e-05
BNIP1	-1.04007	3.33477	19.6865	9.1244e-06	7.31145e-05
PPIP5K1	-1.03964	1.41678	7.77285	0.00530372	0.0170621
LDLRAD3	-1.03866	4.89073	26.086	3.26537e-07	3.91359e-06
KCNK15.AS1	-1.03851	1.5902	8.77912	0.00304698	0.0107472
RHBDF2	-1.03648	3.84742	26.7534	2.3115e-07	2.88777e-06
SMAGP	-1.0357	3.44355	22.7468	1.84815e-06	1.79989e-05
GDPD5	-1.03478	1.2252	5.71636	0.0168076	0.0440943
ADCYAP1R1	-1.03176	2.41631	17.1971	3.36952e-05	0.000226939
TRAM1L1	-1.03134	1.04338	6.20576	0.0127336	0.0351445
POLD2	-1.03123	4.6142	28.8101	7.98326e-08	1.11048e-06
CNPY1	-1.03116	3.5952	12.6522	0.000375131	0.00181572
CYC1	-1.03116	5.9046	52.2716	4.83307e-13	1.94452e-11
PIGO	-1.03059	3.51676	17.9496	2.26831e-05	0.0001612
SPAG7	-1.03004	6.29652	33.5534	6.93344e-09	1.19553e-07
KHDRBS3	-1.02938	5.02068	35.1206	3.09906e-09	5.83306e-08
P3H4	-1.02872	6.31013	48.111	4.02767e-12	1.39055e-10
IPO5	-1.02855	7.91614	67.5082	2.09812e-16	1.47532e-14
ADGRA3	-1.02811	3.63947	21.8729	2.91321e-06	2.67565e-05
CEP41	-1.02798	5.28933	41.057	1.47853e-10	3.71549e-09
PNKP	-1.0279	3.76181	27.3981	1.65591e-07	2.15846e-06
TAB1	-1.02681	4.10815	21.2991	3.92913e-06	3.47145e-05
CKMT1B	-1.02599	4.12972	16.3643	5.2259e-05	0.00033295
MPST	-1.02478	5.63553	49.0633	2.47832e-12	8.83492e-11
RTN4RL2	-1.02458	2.85214	7.80808	0.00520132	0.0167855
USH1G	-1.02452	1.00502	6.66282	0.00984448	0.0284401
TRIM52.AS1	-1.02445	4.50131	34.4637	4.34285e-09	7.93464e-08
PTPN13	-1.02444	6.13231	25.387	4.69066e-07	5.35791e-06
GPM6A	-1.02423	3.80705	24.9791	5.79545e-07	6.46098e-06
NA..247	-1.02298	2.65291	13.5327	0.000234444	0.00121535
KLRG2	-1.02283	3.01512	18.4669	1.72885e-05	0.000127228
SLC5A6	-1.02217	4.11543	31.059	2.50299e-08	3.85999e-07
SLC25A48	-1.02195	1.57627	7.89174	0.0049661	0.0161317
ALG3	-1.02163	5.14938	39.051	4.12868e-10	9.51708e-09
ADAM22	-1.02154	3.4436	18.315	1.87224e-05	0.000136405
TMEM216	-1.02153	2.57707	8.25584	0.00406211	0.0136793
R3HDM2	-1.02093	6.43707	51.2168	8.27067e-13	3.24248e-11
SAMD13	-1.02089	1.99938	10.0826	0.00149679	0.00585611
ITGA2	-1.02082	3.54598	19.563	9.73379e-06	7.73105e-05
HTRA1	-1.01995	3.94403	26.9377	2.10122e-07	2.64882e-06
PSPH	-1.01994	5.28082	19.2656	1.13738e-05	8.88175e-05
REEP6	-1.01947	2.40697	10.9983	0.000911979	0.00386287
SPON1	-1.01848	3.58101	23.8986	1.01547e-06	1.04822e-05
SNTB1	-1.01789	1.83682	7.68808	0.00555867	0.017737
AC107027.3	-1.0178	1.6483	7.46561	0.00628889	0.0196019
AIP	-1.01777	4.67535	38.9507	4.3465e-10	9.9148e-09
KCNJ11	-1.01766	1.65766	9.55045	0.00199901	0.00750312
CARS	-1.01628	6.47034	30.4024	3.51092e-08	5.22007e-07
NA..3439	-1.01624	4.83588	36.6804	1.39173e-09	2.85211e-08
AC008669.1	-1.01538	1.49947	9.08968	0.00257057	0.00926939
FARSB	-1.01479	5.2074	40.1543	2.34676e-10	5.68302e-09
DHRS4L2	-1.0143	1.41499	8.60071	0.00336031	0.0116328
ABHD1	-1.01402	0.950485	5.90936	0.0150606	0.0403821
MYO3A	-1.01385	3.25558	17.4139	3.00622e-05	0.000206093
TMEM246	-1.0138	5.44721	37.6915	8.28634e-10	1.78401e-08
JRK	-1.01365	3.46513	19.01	1.30036e-05	0.000100016
HNRNPA3P6	-1.01337	2.2858	5.92253	0.0149485	0.0401447
UHRF1BP1	-1.01301	4.30265	26.8215	2.2314e-07	2.79453e-06
DUS4L	-1.01243	4.11822	27.2004	1.83417e-07	2.35083e-06
FAAP100	-1.01212	3.19833	20.3274	6.52586e-06	5.46639e-05
BRSK2	-1.0089	3.9186	25.9273	3.54527e-07	4.20944e-06
LINC01315	-1.00851	1.36074	6.02977	0.0140666	0.0382114
ZNF192P1	-1.00833	1.35749	8.01133	0.00464855	0.0153015
PGM1	-1.0082	5.53037	48.1276	3.99371e-12	1.38193e-10
B9D1	-1.00749	4.4943	31.8768	1.64264e-08	2.62566e-07
BX537318.1	-1.00649	1.20652	7.74857	0.00537552	0.0172532
ABCC4	-1.00531	5.64058	44.1455	3.04847e-11	8.68587e-10
BABAM2	-1.00444	3.90519	26.8286	2.22323e-07	2.78659e-06
B3GALT6	-1.00411	5.33463	32.0087	1.53487e-08	2.46883e-07
NDC1	-1.00362	6.77784	49.1907	2.32245e-12	8.33742e-11
SLC25A21.AS1	-1.00289	2.39052	9.41488	0.00215232	0.00796738
KCNG1	-1.00232	2.81775	13.6486	0.000220403	0.00115191
MAMSTR	-1.00185	1.11261	5.96487	0.0145937	0.0394004
RPL13A	-1.00158	10.154	51.1333	8.63034e-13	3.35773e-11
SYNPO	-1.00158	1.33757	6.94501	0.00840534	0.024888
AATK	-1.00129	3.92867	22.4422	2.16559e-06	2.07218e-05
FAM84B	-1.001	5.27236	32.0521	1.5009e-08	2.41928e-07
ECE2	-1.00022	1.79379	8.49572	0.00355982	0.0122186
RPUSD4	-0.999749	5.61761	37.2547	1.03667e-09	2.20404e-08
YIF1B	-0.997572	3.12697	13.1701	0.000284455	0.00143529
MIPEP	-0.997563	3.67074	20.542	5.83369e-06	4.9437e-05
MYLK.AS1	-0.997396	1.13464	5.9541	0.0146831	0.0395776
AC125807.2	-0.997023	2.91525	12.5095	0.000404888	0.0019335
CDK10	-0.996863	2.94521	15.6505	7.61915e-05	0.000464389
AC004148.2	-0.996666	3.87824	16.7933	4.16808e-05	0.000273045
ZNF204P	-0.996222	4.11189	26.4045	2.76901e-07	3.36875e-06
FAM185A	-0.99591	1.10862	7.47074	0.00627098	0.019558
PTPRU	-0.995603	6.03126	33.0299	9.07519e-09	1.53547e-07
MRPL48	-0.995438	5.61087	31.951	1.58107e-08	2.53517e-07
TTLL11	-0.995294	1.30071	6.22577	0.0125904	0.0348121
LOXL1.AS1	-0.995222	2.07597	12.1264	0.000497133	0.00230298
TRIQK	-0.994438	3.21269	16.952	3.83378e-05	0.000254077
SDK1	-0.993741	2.73297	15.3266	9.0434e-05	0.000535703
RPP40	-0.993544	4.43476	33.8485	5.95744e-09	1.05088e-07
TCEA2	-0.993399	4.92584	34.4173	4.44753e-09	8.07775e-08
RBFA	-0.993337	3.81368	26.118	3.21178e-07	3.85539e-06
DEPDC4	-0.992542	2.69179	13.6881	0.000215818	0.00113064
KAT8	-0.992084	3.93413	14.6218	0.000131383	0.000737717
MIR17HG	-0.991981	3.04131	12.5407	0.000398181	0.00190682
HNRNPA1	-0.990602	9.10903	66.2154	4.04235e-16	2.72975e-14
CNPY3	-0.987958	4.34726	22.0213	2.69648e-06	2.49906e-05
MRPL54	-0.986124	4.19911	27	2.03458e-07	2.57752e-06
ACTR1B	-0.985797	5.31004	34.3997	4.48782e-09	8.14127e-08
RPL10	-0.985504	8.25313	58.3011	2.24915e-14	1.14924e-12
AC135178.5	-0.985202	2.26249	12.9072	0.000327327	0.00161753
MBLAC2	-0.985015	5.08493	27.78	1.35923e-07	1.80305e-06
ZNF25	-0.984888	2.20905	9.76255	0.00178102	0.00680152
APRT	-0.984261	6.8152	42.8329	5.96215e-11	1.61759e-09
CKMT1A	-0.982516	4.28509	27.2715	1.76803e-07	2.28324e-06
FCF1P2	-0.981682	2.57886	11.4686	0.000707803	0.00311243
COQ2	-0.981681	5.09451	38.7084	4.92082e-10	1.10603e-08
TSPO	-0.981058	6.00146	45.4493	1.56641e-11	4.7642e-10
HDHD5	-0.980599	5.50298	16.3773	5.19019e-05	0.000331274
EDEM2	-0.980581	3.22391	10.7509	0.00104231	0.00433232
SLC35F1	-0.979186	5.50969	27.1848	1.84907e-07	2.36795e-06
D2HGDH	-0.978491	2.85978	10.3737	0.00127824	0.00511997
ZBTB8A	-0.977856	5.16761	34.0253	5.44011e-09	9.69669e-08
PRH1	-0.977415	1.09624	5.81193	0.0159178	0.0422958
MYLK	-0.977183	3.29652	14.041	0.000178865	0.000961407
PPP1R14A	-0.975476	4.265	22.101	2.58672e-06	2.40606e-05
ACSL6	-0.975225	2.59246	17.2668	3.2482e-05	0.000220156
AARS	-0.975087	6.81773	31.4576	2.0384e-08	3.20478e-07
MID1IP1	-0.974802	4.84752	35.627	2.38951e-09	4.61319e-08
CACNB2	-0.974777	1.87166	8.28797	0.00399085	0.0134689
AL590094.1	-0.97438	3.86979	21.6997	3.18849e-06	2.89209e-05
NA..57	-0.974356	2.34768	13.4057	0.000250864	0.00128671
CRACR2A	-0.974095	2.17792	9.92443	0.001631	0.00630874
ARHGEF4	-0.973118	2.30365	14.4992	0.000140222	0.000779921
NA..233	-0.972579	5.25377	16.6152	4.57835e-05	0.000297379
ARL17B	-0.971835	1.76815	9.27519	0.00232278	0.00851001
SPATA6	-0.970549	3.09244	15.782	7.10736e-05	0.000438426
SLC9A8	-0.970484	2.12574	8.73315	0.00312476	0.010971
TMEM143	-0.970012	3.68762	18.5229	1.67879e-05	0.00012444
TELO2	-0.969955	2.76691	10.6165	0.00112083	0.00459251
SGCE	-0.969756	3.13407	6.91705	0.00853775	0.0251974
EXOSC7	-0.969575	5.57989	48.0471	4.16104e-12	1.42446e-10
TMEM254	-0.969306	4.55979	33.5278	7.02542e-09	1.21003e-07
BCAT2	-0.969091	3.4018	15.3786	8.79803e-05	0.000524155
SRPX	-0.968891	3.3826	18.5104	1.68978e-05	0.000124892
TNS3	-0.968568	2.24492	10.0856	0.00149433	0.00584798
LRRC75A.AS1	-0.968519	8.68876	36.8119	1.30096e-09	2.69493e-08
DTYMK	-0.968514	5.16982	25.9412	3.51971e-07	4.18569e-06
MBTPS2	-0.966892	5.1158	37.8779	7.53122e-10	1.63753e-08
UNC93B1	-0.966758	2.90073	16.1294	5.91597e-05	0.000370904
TMEM109	-0.966511	6.73342	60.2674	8.28095e-15	4.61595e-13
RAD54L	-0.966004	3.34611	12.4488	0.000418251	0.00198499
ABCA3	-0.96587	2.64863	12.263	0.000462037	0.00216262
RPL23AP2	-0.965338	1.66106	5.80373	0.0159922	0.0424641
COL27A1	-0.964687	3.67762	24.7912	6.38881e-07	7.03044e-06
ING5	-0.964217	4.55275	32.1239	1.44646e-08	2.34385e-07
RPL10P3	-0.963835	1.80349	10.5253	0.00117753	0.00477524
SGF29	-0.96373	3.09036	11.0894	0.000868207	0.00370408
ADSL	-0.963537	7.14942	49.432	2.05364e-12	7.5856e-11
NA..4357	-0.962916	1.19397	6.55193	0.010477	0.0299464
EML3	-0.962546	2.1735	6.02922	0.0140709	0.0382163
CYP20A1	-0.962172	6.09155	44.0443	3.2102e-11	9.09595e-10
SLCO4A1	-0.960658	2.68453	14.6189	0.00013159	0.000738355
AGTRAP	-0.960018	3.92469	19.1045	1.23753e-05	9.55188e-05
PSTK	-0.959334	2.93702	9.26546	0.00233516	0.00855001
FBXW8	-0.958154	2.9135	17.8818	2.35054e-05	0.000166504
B4GALT2	-0.957522	5.53374	26.6569	2.42984e-07	3.0184e-06
SLC2A4	-0.957133	1.60598	7.46405	0.00629431	0.0196148
TRIM16	-0.956894	2.70594	13.5248	0.000235433	0.00121883
AC005225.5	-0.956356	0.927137	5.58018	0.0181648	0.04694
WDR4	-0.956127	4.35228	32.8673	9.8668e-09	1.65842e-07
ERP29	-0.955966	7.69097	38.9672	4.30995e-10	9.87553e-09
FAH	-0.955182	3.50632	15.8842	6.73381e-05	0.000417398
RFT1	-0.954417	5.04928	28.1429	1.12678e-07	1.51912e-06
ERGIC1	-0.954144	6.11415	42.519	7.00004e-11	1.86615e-09
MAFG.AS1	-0.953559	2.89586	12.9668	0.00031706	0.0015739
EXD3	-0.953407	2.6752	11.8921	0.00056374	0.00256655
C12orf76	-0.952698	3.49089	20.0025	7.73397e-06	6.33302e-05
AL450384.2	-0.95268	1.64946	8.62211	0.00332108	0.0115256
SMIM19	-0.952235	4.14323	24.5344	7.29947e-07	7.90768e-06
WNT3A	-0.951227	3.46254	19.8216	8.50157e-06	6.89527e-05
TMEM120B	-0.951047	3.96872	22.4909	2.11137e-06	2.02535e-05
PFAS	-0.949549	4.84704	24.692	6.72637e-07	7.36072e-06
OXA1L	-0.949538	6.5072	50.2354	1.36362e-12	5.16123e-11
ARMC4	-0.949399	3.34958	21.6785	3.2239e-06	2.9173e-05
MINCR	-0.948584	3.09316	13.039	0.000305069	0.00151979
HAUS7	-0.947156	4.39984	25.2073	5.14859e-07	5.82619e-06
ADD2	-0.947149	4.75444	25.7886	3.80934e-07	4.46432e-06
EYA1	-0.946608	3.16432	17.7602	2.50576e-05	0.000176035
AP000766.1	-0.946472	1.83272	8.6026	0.00335683	0.0116234
TTC27	-0.946408	3.52969	21.4513	3.62934e-06	3.25156e-05
IFRD2	-0.946153	4.71363	27.1414	1.89105e-07	2.41365e-06
ST3GAL3	-0.94592	1.49072	7.71941	0.00546302	0.0174828
IMPACT	-0.945782	6.57082	32.8239	1.00899e-08	1.68852e-07
ANKRD27	-0.945595	4.79459	35.0277	3.2504e-09	6.07626e-08
LINC00116	-0.945477	3.78534	7.97541	0.00474169	0.0155643
HYI	-0.945225	2.93509	14.1916	0.00016511	0.000897824
COL4A6	-0.945179	3.03626	14.9233	0.000111971	0.000642846
ECSIT	-0.944356	4.04858	25.0523	5.57965e-07	6.25223e-06
TMEM67	-0.944346	3.54063	21.1667	4.2102e-06	3.7027e-05
AL359504.2	-0.944079	1.75321	9.28469	0.00231077	0.00847007
TAMM41	-0.943823	4.04266	24.5073	7.40293e-07	7.97467e-06
C8orf34	-0.943573	2.21639	11.5555	0.000675477	0.0029857
TMA16	-0.94351	6.63356	43.902	3.45241e-11	9.72831e-10
AC024940.1	-0.943447	2.51046	15.4679	8.39167e-05	0.000503665
PRSS27	-0.942534	1.7337	7.61555	0.00578669	0.0183122
PEX7	-0.942469	4.19246	20.5529	5.8007e-06	4.92353e-05
STK39	-0.942154	4.79975	38.2458	6.23727e-10	1.3757e-08
PFKL	-0.942103	4.61664	25.0371	5.62366e-07	6.29694e-06
TEAD2	-0.941847	4.2853	24.9676	5.83031e-07	6.49512e-06
GNB1L	-0.941766	2.82775	14.9822	0.000108529	0.000625194
ACTR5	-0.941182	2.54993	12.3752	0.000435083	0.00205212
PQLC3	-0.940893	3.13885	15.3534	8.91583e-05	0.000529937
WDR34	-0.939996	4.73967	21.7196	3.15553e-06	2.86563e-05
WDSUB1	-0.939748	3.29869	15.4867	8.30864e-05	0.000499659
MZT2B	-0.939083	6.99223	34.7264	3.79453e-09	6.99956e-08
PRELID2	-0.938932	3.87725	19.7846	8.66794e-06	7.00427e-05
UQCC2	-0.9384	5.60396	38.9409	4.36836e-10	9.93511e-09
NA..4451	-0.938088	1.8367	9.82432	0.0017222	0.00662725
ZNF33B	-0.937332	6.04524	33.5702	6.87383e-09	1.18793e-07
AC007405.3	-0.936429	2.24149	10.6934	0.00107517	0.00443285
CLN6	-0.93617	3.95062	21.2545	4.02163e-06	3.54704e-05
GPC6	-0.935443	4.25986	20.2829	6.6796e-06	5.57992e-05
EIF2D	-0.935088	4.95666	18.0027	2.20589e-05	0.000157348
ZNF16	-0.934981	2.92704	13.8855	0.000194292	0.00103449
TEX15	-0.934977	4.4431	16.9205	3.89783e-05	0.000257765
CRYGD	-0.934816	2.95672	13.6017	0.000225976	0.00117743
LRRC75B	-0.934332	1.96868	8.70823	0.00316777	0.0110991
RPL12	-0.934033	9.16859	38.8658	4.53966e-10	1.03094e-08
FAM149A	-0.933626	1.35445	7.32909	0.00678474	0.0208758
NA..195	-0.933553	4.32568	30.3674	3.57483e-08	5.3048e-07
LYRM9	-0.933393	2.45865	8.65079	0.00326919	0.011385
ELOVL2	-0.933325	5.02127	30.8823	2.74162e-08	4.20684e-07
TIGD5	-0.932847	3.42331	18.6964	1.53273e-05	0.00011526
SLC3A2	-0.932832	6.87897	28.8938	7.64592e-08	1.06938e-06
PRR5	-0.93173	1.75733	5.538	0.0186078	0.0479152
RPL22L1	-0.931651	6.10347	36.1381	1.83815e-09	3.64044e-08
OTUD7A	-0.931522	1.47779	7.54405	0.00602085	0.0189049
RPL3	-0.931349	8.38705	49.3108	2.1846e-12	7.99229e-11
PHB2	-0.931302	7.59561	42.7542	6.20681e-11	1.68099e-09
DIMT1	-0.931108	5.40799	38.0352	6.94802e-10	1.52152e-08
DYNC2H1	-0.930966	6.07755	41.417	1.22982e-10	3.14722e-09
FP565260.1	-0.930686	2.17743	11.5954	0.000661165	0.00293173
AC099789.1	-0.929482	4.18587	12.8848	0.000331269	0.00163343
DCPS	-0.928306	3.32882	20.6499	5.51402e-06	4.70888e-05
RPL13AP5	-0.927608	2.85118	6.95422	0.00836216	0.0247937
AAAS	-0.92746	5.00535	19.4189	1.04965e-05	8.26405e-05
ZNF837	-0.927218	1.53223	6.41528	0.0113143	0.0319164
ZFP69	-0.926719	2.16113	11.3064	0.000772393	0.00335601
PPP2R3B	-0.926688	4.10487	27.6929	1.42182e-07	1.87889e-06
AC024060.1	-0.9264	1.2152	6.31782	0.011953	0.0333871
AL133260.1	-0.926003	1.36673	7.34042	0.00674211	0.0207613
RPS2P35	-0.925572	2.62596	12.0277	0.00052415	0.00241645
RBL1	-0.925478	5.16548	28.6617	8.61937e-08	1.18498e-06
CENPBD1P1	-0.924426	3.40873	20.2518	6.78888e-06	5.6558e-05
CA5B	-0.924262	3.29145	13.8897	0.000193856	0.00103253
TTC12	-0.923942	2.74057	14.6456	0.00012974	0.00072983
AL359921.2	-0.923441	2.16973	8.36708	0.00382078	0.0129836
STUB1	-0.92335	6.19857	39.9601	2.59201e-10	6.23752e-09
CRNDE	-0.922573	5.45865	36.8556	1.27207e-09	2.64222e-08
MBD3	-0.922472	4.75057	28.2899	1.04438e-07	1.413e-06
ALDH18A1	-0.922193	5.58572	28.8491	7.82409e-08	1.08933e-06
FTO	-0.921699	4.69891	30.9392	2.66237e-08	4.09754e-07
ADGRA2	-0.921509	2.55931	11.2377	0.000801516	0.00346097
BPHL	-0.921317	4.2772	24.1674	8.83148e-07	9.26611e-06
CHD1L	-0.920216	6.72574	51.0728	8.90033e-13	3.454e-11
FIBP	-0.918698	4.95281	26.6439	2.4462e-07	3.03135e-06
TYRO3	-0.917053	4.05268	25.2686	4.98775e-07	5.6719e-06
CIRBP	-0.916389	6.97613	27.2856	1.75514e-07	2.27235e-06
KIFC3	-0.916324	1.96998	7.26828	0.0070183	0.0214738
LRRC49	-0.915625	4.05394	24.6474	6.88371e-07	7.49986e-06
TMEM106B	-0.915262	6.02325	42.8593	5.88231e-11	1.59876e-09
C17orf58	-0.915201	5.15282	38.1534	6.53965e-10	1.43619e-08
SLC44A1	-0.915161	6.65096	28.6659	8.60055e-08	1.18363e-06
GTF2H2C	-0.915116	2.50584	12.34	0.000443362	0.00208539
VARS2	-0.914688	3.88812	15.6984	7.42864e-05	0.000454949
LONRF1	-0.914395	4.82245	28.9225	7.53326e-08	1.05652e-06
BTBD2	-0.914377	4.10902	18.13	2.0632e-05	0.000148483
FAR2	-0.914365	3.81063	17.914	2.31118e-05	0.000163867
FAM234B	-0.913953	4.99726	32.8032	1.01975e-08	1.70466e-07
CNDP2	-0.913448	3.58334	23.3456	1.35354e-06	1.35966e-05
ANGEL1	-0.913262	3.77661	18.2954	1.89167e-05	0.000137624
APOM	-0.913249	1.2521	6.27009	0.0122793	0.0340749
SLC25A15	-0.913195	2.04263	9.23991	0.00236797	0.00864457
IQCK	-0.913112	2.54608	8.70399	0.00317514	0.0111199
NA..4394	-0.912225	2.40887	10.5733	0.00114735	0.00467635
LDLRAD4	-0.911006	1.94016	10.6813	0.00108226	0.00445966
RALGPS1	-0.910792	2.02117	7.87611	0.00500921	0.0162339
DIAPH2	-0.910507	4.87424	33.2973	7.90904e-09	1.35461e-07
CCDC94	-0.910483	2.84938	10.3399	0.00130187	0.00519561
CD99L2	-0.910443	5.3443	22.6952	1.89837e-06	1.83713e-05
SARS	-0.910262	7.58392	28.4171	9.77974e-08	1.33257e-06
TLN2	-0.91019	4.42502	23.5057	1.24542e-06	1.26515e-05
GTDC1	-0.909581	2.89848	12.5977	0.000386216	0.00186039
PKNOX2	-0.909416	3.17808	15.7109	7.3796e-05	0.000452977
RAC3	-0.909108	5.345	14.3904	0.000148558	0.000820628
EEFSEC	-0.908959	2.3138	11.8283	0.000583361	0.00264158
FKBP10	-0.908502	6.56467	16.6548	4.48376e-05	0.000291977
P2RY11	-0.907776	2.02299	7.77174	0.00530699	0.0170654
GSDME	-0.907732	2.63372	11.2579	0.00079285	0.00343031
B3GALT1	-0.907419	1.64799	8.23627	0.00410615	0.0138033
HDAC4	-0.907161	1.62043	8.50855	0.00353482	0.0121492
ERFE	-0.906971	4.45401	21.6203	3.32313e-06	3.00178e-05
TFB1M	-0.905997	4.90776	30.4154	3.48741e-08	5.19015e-07
TBC1D16	-0.905609	4.74884	25.6959	3.9968e-07	4.64848e-06
AKAP1	-0.905037	5.97292	36.7032	1.37556e-09	2.83034e-08
PXYLP1	-0.903981	3.67859	12.1346	0.000494949	0.00229494
PDIA5	-0.903827	4.82253	32.2734	1.33936e-08	2.18183e-07
FARS2	-0.903684	2.56681	11.6219	0.000651784	0.00289936
PRELID3A	-0.903529	2.3481	10.3757	0.00127683	0.00511699
SYT17	-0.903378	1.96368	8.43554	0.00367959	0.0125762
ADPRM	-0.903044	2.79296	14.2305	0.000161724	0.000880661
RNF126	-0.902416	6.4236	24.4556	7.60405e-07	8.15693e-06
CDK5R1	-0.902412	4.38573	18.5632	1.64362e-05	0.000122187
THNSL1	-0.902035	3.14658	13.499	0.000238692	0.00123292
KIAA0556	-0.901622	2.51807	10.8611	0.000982034	0.00412767
SGSH	-0.900848	3.96364	8.10663	0.00441035	0.0146474
NUTM2A.AS1	-0.900103	2.58724	11.2066	0.000815063	0.00351352
ANKRD13B	-0.898748	1.91952	7.62748	0.00574857	0.0182179
TMEM250	-0.898345	4.90421	24.6549	6.85697e-07	7.49184e-06
LINC01023	-0.898304	1.84678	7.06906	0.00784265	0.0235264
SYS1	-0.896857	4.87287	30.1043	4.0942e-08	6.00574e-07
USH1C	-0.896524	3.60936	14.7819	0.000120685	0.000685942
BBS5	-0.896424	1.89278	7.93303	0.00485405	0.0158517
SEL1L3	-0.896391	4.12462	12.4816	0.000410971	0.00195949
DCAF4	-0.89579	3.20929	16.1218	5.93962e-05	0.000372234
IFT172	-0.895358	2.43747	11.6296	0.000649108	0.00289288
SLC22A5	-0.895345	3.80095	22.4218	2.18871e-06	2.09039e-05
MPI	-0.895156	5.32919	33.7409	6.29615e-09	1.10175e-07
MZF1	-0.894645	2.35091	11.1948	0.000820271	0.003533
SLC25A26	-0.893755	4.79074	28.0594	1.17648e-07	1.58195e-06
CCDC191	-0.893472	3.00777	10.2487	0.00136784	0.00543064
SLC27A4	-0.893179	3.32032	18.5106	1.68962e-05	0.000124892
PRMT1	-0.891945	6.12975	23.916	1.00633e-06	1.0406e-05
TMEM39A	-0.89164	5.05818	32.2498	1.35569e-08	2.2061e-07
MKS1	-0.891512	4.45088	24.6962	6.71176e-07	7.35415e-06
TMBIM4	-0.890888	5.96138	40.6125	1.85616e-10	4.5671e-09
PPA2	-0.889923	6.04753	35.1684	3.0239e-09	5.71557e-08
MED16	-0.889824	2.20007	9.02282	0.0026663	0.00956064
TIMM44	-0.888911	5.61868	27.6277	1.47061e-07	1.93834e-06
DUS2	-0.888637	2.8576	14.7851	0.000120487	0.000685256
PPT1	-0.888145	6.78451	46.1874	1.07467e-11	3.38267e-10
ALG12	-0.885772	4.06016	26.2423	3.01155e-07	3.63497e-06
CDCA4	-0.885443	5.52444	37.3542	9.85079e-10	2.1031e-08
PPARG	-0.8853	3.0695	11.2369	0.000801874	0.00346154
SNHG15	-0.885121	4.27061	17.2669	3.24802e-05	0.000220156
PCYOX1L	-0.884827	4.39924	25.3947	4.67212e-07	5.34071e-06
EXD2	-0.884744	3.42234	11.6063	0.000657299	0.00291797
AC091042.1	-0.884608	1.64956	7.82059	0.00516544	0.0166873
FKBP9	-0.884569	2.80609	12.6131	0.000383056	0.00184766
HEATR1	-0.884457	6.7733	28.0205	1.20038e-07	1.60844e-06
TIMM13	-0.88437	6.92145	39.5232	3.24184e-10	7.66886e-09
CHPT1	-0.884078	5.89669	21.032	4.51685e-06	3.94748e-05
PTPRE	-0.88393	1.20764	5.71517	0.016819	0.0441092
PAFAH1B3	-0.88392	5.14642	27.2019	1.83275e-07	2.35083e-06
TRIP10	-0.883419	4.26691	23.9152	1.00673e-06	1.0406e-05
RNF130	-0.882136	4.47788	13.1482	0.000287801	0.00144836
FPGS	-0.882104	3.34813	14.2528	0.000159824	0.000871864
ERMP1	-0.881844	3.75918	17.4253	2.98829e-05	0.000205047
EIF3E	-0.881515	7.3634	36.241	1.74363e-09	3.48022e-08
ZNF32	-0.881381	3.83146	22.0025	2.72295e-06	2.51749e-05
TSEN2	-0.881358	3.52836	19.8668	8.3031e-06	6.74501e-05
RIN2	-0.881003	1.94898	8.18313	0.00422817	0.0141391
CXCL16	-0.880668	2.7077	11.6942	0.000626942	0.00281117
LIG3	-0.880102	4.53529	22.9131	1.69493e-06	1.66442e-05
METAP1D	-0.879993	2.16372	9.79634	0.0017486	0.00670777
TDRD3	-0.879039	4.13785	22.2103	2.44355e-06	2.28956e-05
MED11	-0.878889	4.12057	14.1536	0.000168475	0.000913855
MVB12A	-0.878483	4.35511	27.2211	1.81471e-07	2.33174e-06
TMEM117	-0.87812	2.51205	8.85912	0.00291628	0.0103361
MMACHC	-0.878037	4.83067	25.7068	3.97429e-07	4.62581e-06
RPL5P17	-0.877846	1.70745	7.83332	0.00512919	0.0165806
F12	-0.877334	3.44499	9.50299	0.00205137	0.00765314
TMEM94	-0.877159	4.06093	18.3337	1.85402e-05	0.00013527
ZNF254	-0.876682	2.41919	9.94554	0.00161239	0.00624782
GRB14	-0.875812	3.02798	14.2722	0.000158185	0.000865131
PLPP1	-0.875529	4.2879	24.6365	6.92289e-07	7.53165e-06
LINC01976	-0.875442	3.85189	17.8459	2.3954e-05	0.000169134
STK32C	-0.875213	5.27074	28.5145	9.29992e-08	1.27284e-06
TMEM53	-0.874975	2.46577	10.8129	0.00100797	0.00421357
SLC7A2	-0.874825	3.8407	12.7211	0.000361552	0.0017614
TOMM20	-0.874819	8.41013	52.972	3.3833e-13	1.40549e-11
ZFP14	-0.874576	3.19154	13.8765	0.000195223	0.00103765
TRIM14	-0.874432	4.44167	26.5074	2.62528e-07	3.21686e-06
MOGS	-0.874093	4.13158	20.9128	4.8066e-06	4.18163e-05
AAED1	-0.873603	4.61896	24.1219	9.04261e-07	9.46172e-06
RPS2	-0.873134	10.1705	52.9429	3.43391e-13	1.42266e-11
CHST10	-0.873101	3.23807	13.9831	0.000184462	0.000989024
AMN1	-0.872765	3.6768	15.3264	9.04428e-05	0.000535703
HEMK1	-0.87276	3.41431	19.0231	1.29144e-05	9.94798e-05
RAPGEF1	-0.872591	5.22852	26.5876	2.51849e-07	3.11338e-06
NOC3L	-0.872057	6.75359	49.0909	2.4437e-12	8.73181e-11
VARS	-0.871632	4.31641	21.2619	4.00624e-06	3.5355e-05
DNMBP	-0.871237	2.88036	12.4423	0.000419716	0.00199128
P2RX4	-0.870956	2.35783	9.78968	0.00175494	0.00672537
ARHGAP39	-0.870738	1.64517	5.65502	0.0174055	0.0453601
NUS1	-0.869488	4.5981	15.59	7.86687e-05	0.000477211
MAPK12	-0.869246	3.24771	10.3951	0.00126351	0.00506891
DPY19L4	-0.869239	4.95636	17.8648	2.37169e-05	0.000167847
IQSEC1	-0.868641	4.30883	20.3152	6.5676e-06	5.49834e-05
ITGB5	-0.868528	4.66393	25.856	3.67868e-07	4.33107e-06
CLMN	-0.868313	4.2576	20.9108	4.81174e-06	4.18373e-05
ZFAS1	-0.86787	7.18569	33.8166	6.05594e-09	1.06458e-07
METTL4	-0.867594	2.73932	10.5882	0.00113813	0.00464617
ZNF511	-0.866748	4.77919	31.0717	2.48668e-08	3.8387e-07
DFFB	-0.866159	3.42859	10.0991	0.00148343	0.00581424
ATP2A1.AS1	-0.8658	4.58169	20.3294	6.51899e-06	5.46362e-05
ZBTB14	-0.86507	3.01231	12.6563	0.000374299	0.00181341
MUTYH	-0.863238	2.34047	10.454	0.00122387	0.00493312
DVL1	-0.863091	5.19243	24.9611	5.85e-07	6.51232e-06
STOML2	-0.862859	7.08647	44.7487	2.24013e-11	6.66774e-10
KREMEN2	-0.862744	1.85367	8.17038	0.00425799	0.0142264
NA..2780	-0.862537	3.19757	9.51547	0.00203747	0.00762136
MRPL58	-0.862039	5.65495	34.2766	4.78084e-09	8.60159e-08
ARHGEF9	-0.862016	3.12285	15.43	8.56187e-05	0.000512475
H1FX	-0.861527	6.71418	27.8192	1.33195e-07	1.77081e-06
SNHG16	-0.860829	8.29525	49.9764	1.55604e-12	5.84619e-11
SULF1	-0.860553	3.09788	14.4181	0.000146391	0.000809825
SLC10A7	-0.860548	3.46872	13.2942	0.000266223	0.00135669
VASH1.AS1	-0.860117	3.28363	10.8498	0.000988057	0.00414843
AC027307.2	-0.860114	2.40986	8.37325	0.00380784	0.0129424
BDH1	-0.859719	2.09448	7.31259	0.00684732	0.0210346
CHDH	-0.859385	3.89867	18.2965	1.89059e-05	0.000137611
HLCS	-0.859184	4.48041	23.882	1.02424e-06	1.05515e-05
SAAL1	-0.858929	5.85828	32.5718	1.1487e-08	1.89542e-07
CTIF	-0.858525	2.0326	7.18182	0.00736459	0.0223239
FHAD1	-0.857922	2.42277	9.26021	0.00234186	0.00856966
FUZ	-0.857819	4.92005	9.66426	0.00187887	0.00710572
SLC41A3	-0.856809	4.80029	24.2773	8.34181e-07	8.83091e-06
SPEF2	-0.85592	2.9904	11.1331	0.000848003	0.00363609
STX8	-0.855762	3.82525	17.9911	2.21934e-05	0.000158234
THSD4	-0.855628	2.89189	10.76	0.0010372	0.00431225
ARFRP1	-0.855574	3.10888	14.5248	0.000138328	0.000770227
PAG1	-0.854785	5.76783	24.9827	5.78464e-07	6.45832e-06
FITM2	-0.854487	3.62121	19.6431	9.33409e-06	7.44832e-05
NA..332	-0.854221	5.46806	37.5431	8.94133e-10	1.91963e-08
RHOT1	-0.853924	5.14299	24.7048	6.68176e-07	7.32652e-06
TPCN1	-0.853492	3.05737	12.9589	0.000318412	0.0015801
PPM1L	-0.852006	4.3142	22.1809	2.4813e-06	2.31926e-05
CRYL1	-0.851708	3.71326	18.7323	1.50417e-05	0.000113583
MAN1B1	-0.851467	3.77294	15.3084	9.13107e-05	0.000539592
MFSD13A	-0.850618	3.78094	16.1489	5.8553e-05	0.000368154
RPL13AP25	-0.850448	4.52257	14.9135	0.000112556	0.000645964
ARHGEF17	-0.849774	1.35545	5.56385	0.0183351	0.0472844
IFT46	-0.84818	4.80014	24.9162	5.98758e-07	6.64136e-06
SVBP	-0.847887	4.72327	19.196	1.17958e-05	9.17393e-05
PGAP2	-0.847579	4.3516	13.1265	0.000291147	0.00146184
SFXN4	-0.847049	5.56562	25.2282	5.09333e-07	5.77056e-06
TMEM43	-0.846272	6.17763	14.6263	0.000131075	0.000736528
JPH1	-0.845717	4.32841	24.2542	8.44226e-07	8.91263e-06
TRIM16L	-0.845398	2.71265	11.0303	0.000896334	0.00380712
NA..3449	-0.844108	1.85887	7.09541	0.00772814	0.023242
ACOX3	-0.84356	3.12687	11.8062	0.000590338	0.00267019
CROCC	-0.843378	2.49801	10.3221	0.00131445	0.00523491
AC010531.6	-0.842654	1.71347	7.19237	0.00732143	0.0222194
AFG1L	-0.842455	2.29487	9.72104	0.0018217	0.00693096
MRPL12	-0.842022	4.76004	23.6047	1.183e-06	1.20653e-05
COL25A1	-0.841901	2.97423	12.7451	0.00035694	0.00174096
EIF4B	-0.841733	7.26432	13.0866	0.000297414	0.00148746
DET1	-0.840994	3.18736	12.1587	0.000488595	0.00226891
KLF15	-0.840447	2.48888	7.50142	0.00616505	0.0192787
C19orf70	-0.840221	4.54895	19.9899	7.78506e-06	6.36465e-05
TPRA1	-0.840059	3.23868	11.4151	0.000728489	0.00318422
TCF25	-0.839873	6.56705	27.257	1.78131e-07	2.29653e-06
ABHD14B	-0.837998	4.62099	21.4895	3.55776e-06	3.19303e-05
LRRIQ1	-0.837847	3.46333	13.3042	0.000264819	0.00135089
DTD2	-0.837771	4.95204	31.7377	1.76467e-08	2.80028e-07
KIAA1644	-0.836991	2.47901	8.68473	0.00320888	0.0112125
HMGA2	-0.836901	6.49711	40.9538	1.55872e-10	3.90419e-09
PVR	-0.836823	5.37229	24.5042	7.41475e-07	7.98179e-06
RIOX2	-0.836675	5.80885	33.1949	8.33674e-09	1.42151e-07
TENM4	-0.836581	1.38947	6.51341	0.0107064	0.0304827
ADAM9	-0.836472	4.94779	10.6353	0.00110951	0.00455359
NA..10	-0.836422	5.51744	26.9878	2.0474e-07	2.58949e-06
PRR3	-0.836306	4.26067	20.8289	5.0219e-06	4.3345e-05
WARS	-0.835945	5.94506	24.6474	6.88388e-07	7.49986e-06
NA..59	-0.835609	2.92653	9.4263	0.00213896	0.00792749
FANCE	-0.83497	4.32506	24.4211	7.74154e-07	8.28013e-06
RNF135	-0.83496	2.78209	10.7909	0.00102	0.00425225
TRAF7	-0.833745	4.94777	20.6929	5.39152e-06	4.61971e-05
PTPRF	-0.833522	6.92375	33.7636	6.22324e-09	1.09024e-07
GMDS	-0.833482	5.39987	31.1633	2.37212e-08	3.68039e-07
SLC16A1.AS1	-0.833271	5.15263	19.5614	9.74175e-06	7.73336e-05
SNORA11F	-0.833091	3.1967	12.0203	0.000526244	0.00242382
BOLA3.AS1	-0.832795	3.18534	12.8372	0.000339805	0.00166951
EXOSC5	-0.832789	4.55749	20.4694	6.05924e-06	5.11184e-05
AC022400.7	-0.831032	5.45823	15.6646	7.56261e-05	0.000461873
ADGRB2	-0.830894	2.31005	6.95608	0.0083535	0.0247776
WDR92	-0.830296	3.17015	12.5513	0.000395938	0.00189726
SFXN2	-0.829866	4.00213	17.6631	2.63691e-05	0.00018384
TMEM147	-0.828047	6.68382	29.5994	5.31206e-08	7.61014e-07
AL031727.1	-0.827839	2.60985	8.41336	0.00372473	0.012705
RPS3AP49	-0.827648	3.06423	10.3672	0.00128273	0.00513529
TMEM192	-0.826275	6.22269	28.6599	8.627e-08	1.18498e-06
TCTN3	-0.826015	4.81028	28.3307	1.0226e-07	1.38962e-06
SLC29A3	-0.825461	2.64702	10.4731	0.00121126	0.0048929
DOK1	-0.825081	3.29464	11.7596	0.000605297	0.00272499
AIG1	-0.824974	5.88938	31.6628	1.83403e-08	2.90433e-07
RPS18	-0.824479	9.84328	45.5315	1.50206e-11	4.58666e-10
IPO4	-0.824182	4.24897	21.5861	3.38291e-06	3.05039e-05
RNF157	-0.82414	5.06155	20.5347	5.85613e-06	4.95959e-05
POLR3K	-0.824097	5.83864	33.6046	6.75332e-09	1.17371e-07
SIAH2	-0.823854	4.72819	16.4661	4.95274e-05	0.000318593
CEBPG	-0.823329	5.58557	18.4833	1.714e-05	0.000126378
MARC1	-0.823101	5.58149	32.0306	1.51762e-08	2.44365e-07
NOP53	-0.823053	6.64236	22.1583	2.51068e-06	2.33959e-05
VLDLR	-0.823036	3.38359	10.3323	0.0013072	0.00520957
RPL3P4	-0.822999	4.1033	16.3144	5.36536e-05	0.000340985
ENTPD5	-0.822864	4.28468	23.1186	1.52309e-06	1.51018e-05
NT5DC1	-0.822513	5.86045	26.7784	2.28168e-07	2.85517e-06
LMAN1	-0.82214	7.79394	44.5777	2.44455e-11	7.16491e-10
NFYC	-0.821578	4.30282	22.988	1.63017e-06	1.607e-05
PIGBOS1	-0.821367	3.46817	17.455	2.94188e-05	0.000202588
ATP23	-0.82094	3.72643	18.6168	1.59802e-05	0.000119408
COPG2	-0.82081	4.13309	12.4748	0.000412477	0.00196484
CHCHD5	-0.820046	2.05968	8.56687	0.00342335	0.0118084
RAB32	-0.819923	2.58107	11.6638	0.000637266	0.00284634
PRSS16	-0.819587	2.57804	7.87774	0.0050047	0.0162227
OTX1	-0.819159	2.04885	8.23784	0.0041026	0.0137974
UTP14C	-0.819152	5.27571	23.9103	1.00929e-06	1.04255e-05
MAST1	-0.818031	3.61623	16.6744	4.43752e-05	0.000289459
SSR3	-0.817653	7.63866	45.6388	1.42194e-11	4.36811e-10
FAM81A	-0.81755	2.10658	8.84125	0.00294498	0.0104229
RPL7A	-0.817199	10.2187	46.4116	9.58454e-12	3.06086e-10
GRID1	-0.816967	2.71672	10.382	0.00127251	0.00510237
WSCD1	-0.816842	3.18184	13.2767	0.000268726	0.00136809
UNG	-0.81626	6.38117	32.2761	1.33749e-08	2.18111e-07
WDR36	-0.816094	5.15708	19.5132	9.99092e-06	7.91148e-05
ZNF277	-0.815891	4.45233	21.9156	2.84915e-06	2.61995e-05
SLC35C2	-0.815888	4.23306	19.558	9.7593e-06	7.74329e-05
EPRS	-0.813764	8.91346	43.3652	4.54202e-11	1.25224e-09
ZNF573	-0.813506	2.59957	11.4062	0.000732003	0.00319865
LRRC75A	-0.812593	1.74776	7.15154	0.00748997	0.0226234
HS6ST2	-0.81238	5.81087	27.0057	2.02852e-07	2.57197e-06
BMP8B	-0.812207	3.4637	14.4228	0.000146026	0.000808099
SEMA3G	-0.812068	2.33262	7.25206	0.00708199	0.0216427
RPL4	-0.811948	8.90488	34.3597	4.58108e-09	8.27131e-08
GSTZ1	-0.811708	5.31988	20.7496	5.23438e-06	4.50016e-05
HORMAD1	-0.811444	1.84698	6.37237	0.0115911	0.0325123
POC1B	-0.811397	4.81761	19.4572	1.0288e-05	8.12425e-05
GSTO2	-0.810604	3.30448	11.0682	0.000878193	0.00373836
NLRX1	-0.809956	2.66973	9.29046	0.0023035	0.0084532
ALKBH8	-0.809912	4.80874	20.9176	4.7946e-06	4.17593e-05
RAN	-0.809097	9.45725	47.2891	6.12508e-12	2.04556e-10
CRLF3	-0.808522	3.41056	15.482	8.32961e-05	0.000500724
MRPS18B	-0.808309	7.28983	26.1589	3.14441e-07	3.78045e-06
LSM2	-0.808297	5.39268	19.8976	8.17007e-06	6.65811e-05
LINGO1	-0.808265	4.21774	19.7413	8.86643e-06	7.13457e-05
NUDT16	-0.808087	4.64386	25.8794	3.63436e-07	4.29207e-06
FLT4	-0.80755	3.50305	13.4254	0.000248245	0.00127526
SRD5A3	-0.807351	5.73329	33.7106	6.39511e-09	1.11731e-07
CEP290	-0.806862	7.59743	38.9625	4.32015e-10	9.88412e-09
DENND4B	-0.806683	4.27829	19.6763	9.17337e-06	7.34301e-05
AC015917.2	-0.806641	2.20183	9.22393	0.00238873	0.00870172
SET	-0.806399	9.41099	42.6987	6.38556e-11	1.72635e-09
GPR27	-0.806239	5.72251	22.2281	2.42102e-06	2.27262e-05
KIAA0368	-0.806101	6.40986	36.9737	1.19731e-09	2.51764e-08
GTF3A	-0.805977	5.89211	26.2855	2.94491e-07	3.56014e-06
ATG16L2	-0.805416	2.747	8.6615	0.00325003	0.0113381
SLC2A12	-0.805109	4.19435	15.0193	0.000106419	0.000615119
ZNF22	-0.804313	6.37555	41.2345	1.35018e-10	3.42664e-09
GGCT	-0.804188	6.75533	41.6801	1.075e-10	2.79299e-09
ERO1A	-0.803261	6.53392	23.7739	1.08341e-06	1.11162e-05
EFCAB11	-0.803215	4.55096	15.0772	0.0001032	0.000599904
TTC7B	-0.802996	4.80709	24.2631	8.40353e-07	8.88046e-06
NA..316	-0.802761	1.70233	6.36314	0.0116515	0.032646
ANO5	-0.802308	3.66402	16.4	5.12845e-05	0.000328671
SNX33	-0.801957	1.98539	7.81125	0.0051922	0.0167596
IRAK1BP1	-0.801614	3.12351	13.7429	0.000209611	0.00110227
ADORA2B	-0.801032	3.78192	17.912	2.31353e-05	0.000163958
ADAMTS3	-0.800727	3.68145	14.3861	0.000148894	0.000822188
CDH23	-0.799771	2.17646	7.39246	0.00654979	0.020275
PHKA2	-0.799407	3.12731	13.5984	0.000226379	0.00117913
SRPRB	-0.799234	6.96527	26.4791	2.6641e-07	3.25922e-06
PCNX4	-0.799038	6.28152	27.276	1.76386e-07	2.27979e-06
RPUSD1	-0.798829	3.9213	14.4529	0.000143706	0.000796409
HEATR6	-0.798453	5.15417	28.6699	8.58272e-08	1.18313e-06
FAM50B	-0.798137	3.36907	12.9047	0.000327751	0.00161911
MRPS26	-0.7973	6.42774	20.2832	6.67832e-06	5.57992e-05
HINT2	-0.797183	5.67379	15.2059	9.64e-05	0.000564876
NME3	-0.797076	4.61377	17.9707	2.24331e-05	0.000159794
ZBTB22	-0.7966	2.88409	8.57481	0.00340845	0.0117702
BICRAL	-0.796578	2.95722	12.0668	0.000513268	0.00237056
PTCD2	-0.796552	3.09818	12.4488	0.00041826	0.00198499
SMIM7	-0.796314	5.36791	31.4936	2.00095e-08	3.15238e-07
AGAP1	-0.795692	5.2433	27.4398	1.62063e-07	2.11607e-06
HEBP1	-0.795427	5.25517	30.1625	3.97319e-08	5.84501e-07
MPG	-0.795394	3.97277	18.068	2.13152e-05	0.000152683
STAT5B	-0.795196	4.26543	21.3477	3.8308e-06	3.40616e-05
FXN	-0.79488	4.65699	23.0789	1.55491e-06	1.53775e-05
ITGA4	-0.794778	2.44725	8.79162	0.00302618	0.0106787
CYB561	-0.794204	4.09437	16.8909	3.95901e-05	0.000261022
ARV1	-0.794092	6.09872	32.8498	9.9561e-09	1.66795e-07
FTSJ1	-0.79353	4.76404	21.7613	3.08763e-06	2.81226e-05
RAD51B	-0.793232	2.92659	10.6323	0.0011113	0.00455729
SLC39A3	-0.792991	4.47587	23.1502	1.49826e-06	1.49135e-05
DHFR2	-0.792791	4.34235	18.983	1.31889e-05	0.000101233
KIAA0141	-0.791833	5.41418	22.6332	1.96064e-06	1.89076e-05
MFSD4A	-0.791195	2.11343	7.61695	0.0057822	0.0183018
NA..2441	-0.791017	2.02661	6.08939	0.0135996	0.0371469
JAGN1	-0.790911	6.05102	22.8876	1.71757e-06	1.68341e-05
ZDHHC8	-0.790826	3.71643	7.20777	0.00725887	0.022056
RNF13	-0.790814	5.1123	22.2251	2.42488e-06	2.27485e-05
TMEM74B	-0.790789	1.73095	6.21251	0.0126851	0.0350296
CEPT1	-0.790713	5.85385	24.1403	8.95679e-07	9.38473e-06
WDR54	-0.789872	5.3637	19.376	1.07348e-05	8.43863e-05
PLCG2	-0.789287	2.48711	8.85245	0.00292696	0.0103691
PIGQ	-0.789147	2.92836	9.53437	0.00201659	0.0075525
GABRB3	-0.788883	5.24415	20.9134	4.80519e-06	4.18163e-05
HILPDA	-0.788805	5.50362	29.4997	5.59254e-08	7.99702e-07
AC093752.1	-0.788803	1.97132	8.33443	0.00389006	0.0131839
LEMD2	-0.788486	4.375	20.6023	5.65269e-06	4.81389e-05
SLC1A1	-0.788318	2.31177	7.33939	0.00674596	0.020769
STEAP1B	-0.788278	2.44886	8.33161	0.00389611	0.0131898
BIVM	-0.788242	5.03856	24.4622	7.57805e-07	8.14614e-06
USP25	-0.787349	5.12559	25.9391	3.52356e-07	4.18702e-06
GNG7	-0.787202	3.44686	10.8412	0.000992675	0.00416607
DRAM2	-0.786853	5.09454	21.365	3.79647e-06	3.38153e-05
FBXL4	-0.786706	3.59965	10.332	0.0013074	0.00520957
AXIN1	-0.786534	3.58768	14.1177	0.000171721	0.000928569
NR1D2	-0.786449	5.31401	21.1322	4.28655e-06	3.76122e-05
APEH	-0.786438	5.06289	21.5819	3.39044e-06	3.05538e-05
AP4S1	-0.785151	3.17103	12.9187	0.000325321	0.0016097
AP3S2	-0.784957	4.48994	18.2451	1.94221e-05	0.0001409
OSTC	-0.784727	7.2596	36.8186	1.29645e-09	2.68921e-08
TMEM168	-0.784591	3.92837	12.8232	0.000342339	0.00167873
LZTR1	-0.78376	4.16104	10.9316	0.000945362	0.00399104
DIRAS1	-0.782895	2.62232	8.81488	0.00298784	0.0105604
CAMK4	-0.782444	3.27389	13.764	0.000207274	0.00109223
CPNE1	-0.781686	6.46341	34.7658	3.71848e-09	6.86753e-08
ACAT1	-0.781472	6.27111	16.3936	5.14583e-05	0.000329141
PARP16	-0.781436	3.41553	11.6362	0.000646799	0.00288556
ZRANB3	-0.780798	4.98335	25.4092	4.63711e-07	5.30861e-06
AL928654.5	-0.780373	1.91334	6.78403	0.00919768	0.0267993
KAZN	-0.780325	3.39442	13.8114	0.000202106	0.00106823
USP13	-0.780222	5.33684	25.2068	5.15004e-07	5.82619e-06
SPOCK3	-0.780082	3.56064	14.6188	0.000131593	0.000738355
SYPL2	-0.779964	3.14344	8.5366	0.00348074	0.0119848
TTC25	-0.779602	2.65193	7.09414	0.00773364	0.023254
CORO7	-0.779508	2.86531	10.23	0.00138177	0.00548024
RAP2A	-0.77917	5.76073	12.5121	0.000404332	0.00193144
NA..265	-0.778494	5.08076	26.5626	2.55134e-07	3.14891e-06
PIEZO1	-0.77847	3.62777	12.5706	0.000391869	0.00188188
LMAN2L	-0.778423	4.05951	10.1384	0.00145212	0.00571195
CFAP97	-0.778123	6.51156	36.0271	1.94596e-09	3.82922e-08
VWA1	-0.777849	3.28646	12.6105	0.000383593	0.00184909
UBL4A	-0.777808	5.7839	26.9575	2.07976e-07	2.62609e-06
NDUFS4	-0.777436	5.88233	34.4254	4.42905e-09	8.06455e-08
MGAT3	-0.777264	3.17363	11.9921	0.000534263	0.00245201
MNX1.AS1	-0.777113	2.70794	8.20048	0.00418793	0.0140229
PLBD2	-0.776962	4.25513	16.3889	5.15862e-05	0.000329623
ARL6IP4	-0.776954	3.60865	8.68491	0.00320856	0.0112125
TRAPPC9	-0.776923	1.80884	6.27098	0.0122732	0.0340701
MTHFD1	-0.776876	6.68675	33.048	8.99114e-09	1.52293e-07
RPL41P2	-0.776817	2.6259	10.0305	0.00153973	0.00600727
GRB10	-0.776453	5.14644	25.0069	5.71267e-07	6.38727e-06
BOD1	-0.776345	6.18853	29.8713	4.61707e-08	6.69585e-07
SMOC1	-0.775996	5.04262	21.8941	2.88123e-06	2.64786e-05
STX2	-0.775809	4.89189	26.844	2.20563e-07	2.76678e-06
AL122020.1	-0.775738	2.20443	5.64536	0.0175016	0.0455488
MRPS2	-0.775688	5.36457	24.0557	9.35883e-07	9.74603e-06
C1orf174	-0.775632	4.25807	7.20597	0.00726615	0.0220691
SLC2A8	-0.775256	4.13067	17.2489	3.27881e-05	0.000221707
VEGFB	-0.775203	3.83712	13.2683	0.000269938	0.00137321
PARVB	-0.77519	3.84711	16.9422	3.85356e-05	0.00025524
C1orf123	-0.77448	4.80897	18.0218	2.18394e-05	0.000156073
ARSB	-0.774203	2.63734	6.10215	0.0135018	0.0369192
CLUAP1	-0.773627	4.9804	19.4554	1.02977e-05	8.12425e-05
SRI	-0.773505	6.17833	27.2395	1.79746e-07	2.31346e-06
SPIDR	-0.77341	3.44015	7.925	0.00487564	0.0159086
TBL2	-0.773155	4.8832	25.9515	3.50095e-07	4.16985e-06
KANK1	-0.773134	3.01296	12.9076	0.000327244	0.00161753
LMBRD1	-0.773046	5.53188	22.8471	1.75418e-06	1.71491e-05
SH2D4A	-0.772924	1.89104	6.41472	0.0113178	0.0319164
TMEM128	-0.772381	3.87706	5.89841	0.0151546	0.0405843
LNPK	-0.772325	6.2174	23.7511	1.09631e-06	1.1241e-05
LMLN	-0.772069	3.75893	13.0112	0.000309634	0.00154003
RPL13	-0.771989	9.95446	39.6723	3.00348e-10	7.16025e-09
CMC1	-0.771736	5.35162	18.0918	2.10503e-05	0.000150997
GLT8D1	-0.77155	5.17487	26.3886	2.79189e-07	3.39119e-06
STT3A	-0.771009	7.20041	41.7393	1.04291e-10	2.71883e-09
TMEM87B	-0.770964	4.29343	17.5032	2.86822e-05	0.000198318
PIK3CD.AS2	-0.770309	3.75257	10.4312	0.00123903	0.00498766
FMC1	-0.770293	6.85907	13.2656	0.000270323	0.00137439
PIGL	-0.769347	4.43467	18.8848	1.38852e-05	0.000105578
RABGGTB	-0.768698	5.51284	11.7191	0.000618623	0.00277846
ZFP62	-0.768498	5.1177	24.3672	7.9613e-07	8.47492e-06
NSMAF	-0.768494	3.96939	15.2307	9.5142e-05	0.000559215
MOSPD3	-0.768274	3.4538	13.7098	0.000213336	0.00111879
RCBTB1	-0.767683	3.59575	12.3999	0.000429351	0.00202945
TMEM241	-0.767518	3.32691	10.8409	0.000992802	0.00416607
PNPLA6	-0.766645	2.13367	6.81501	0.00903948	0.0264482
SIRT5	-0.76654	4.1896	19.009	1.30103e-05	0.000100018
CREB3L2	-0.765727	6.05374	25.2431	5.05411e-07	5.7346e-06
RTL8A	-0.765548	7.20425	35.8857	2.09242e-09	4.10687e-08
DTWD1	-0.76551	3.6727	12.7813	0.000350109	0.00171355
SMIM20	-0.765343	3.9289	17.8617	2.37556e-05	0.000168043
MRPL1	-0.765342	5.62527	22.0626	2.63903e-06	2.45025e-05
METTL2A	-0.765108	4.30703	13.2051	0.000279194	0.00141339
NA..43	-0.764886	4.81113	17.7879	2.46947e-05	0.000173645
EBF4	-0.76481	2.15635	5.66524	0.0173043	0.0451503
GPR180	-0.764673	6.1101	25.8314	3.72575e-07	4.37641e-06
DUSP9	-0.764618	5.08308	21.8381	2.96648e-06	2.7132e-05
ZNF438	-0.764285	1.85003	6.34814	0.0117504	0.0328839
TKFC	-0.763914	3.89776	16.9891	3.75948e-05	0.000249584
SLC39A4	-0.763688	4.78413	21.5744	3.40367e-06	3.06371e-05
ESD	-0.76333	7.40862	38.9931	4.2531e-10	9.75985e-09
CDCA7L	-0.763257	5.39246	23.4395	1.28905e-06	1.30514e-05
FBL	-0.763154	8.74293	28.578	8.99979e-08	1.23397e-06
GATB	-0.762711	3.40713	11.6175	0.000653357	0.00290467
LRRN2	-0.762633	1.79593	5.88759	0.0152479	0.0407773
ASAP3	-0.762342	1.46356	5.51803	0.0188214	0.0483596
PARS2	-0.762182	3.15781	10.1524	0.00144112	0.00567599
ADAM15	-0.761946	5.02367	14.3272	0.000153633	0.000845007
CMSS1	-0.76175	6.61097	22.7157	1.87828e-06	1.82113e-05
LAMB1	-0.760167	6.10172	26.3084	2.91027e-07	3.52381e-06
ARRB1	-0.759789	2.07391	7.60756	0.0058124	0.0183822
HERPUD1	-0.758571	6.37244	27.3065	1.73624e-07	2.25238e-06
ABHD17C	-0.757462	4.89937	11.7896	0.000595623	0.00269013
PARP3	-0.757368	2.91419	8.15914	0.00428447	0.0142993
PRKAG2.AS1	-0.757186	4.4526	21.3019	3.92336e-06	3.46835e-05
CCDC167	-0.757172	4.40777	17.0867	3.57109e-05	0.000238524
ANO6	-0.756614	5.03964	22.7335	1.86097e-06	1.80778e-05
POT1	-0.756564	3.73563	15.9908	6.36499e-05	0.000395978
MBNL3	-0.756522	5.16871	18.9079	1.37181e-05	0.000104463
TMED10	-0.756292	7.87072	38.3618	5.87711e-10	1.30188e-08
TMEM131	-0.755599	5.28781	22.6631	1.93036e-06	1.86455e-05
CRYZL1	-0.755584	5.1861	25.9243	3.55066e-07	4.20944e-06
TTC31	-0.755501	3.70208	9.17794	0.00244949	0.00889136
SHROOM1	-0.755094	2.99486	11.679	0.000632095	0.00283067
SCAMP5	-0.75505	2.37944	7.86052	0.00505258	0.0163537
PCIF1	-0.754676	2.54307	7.28961	0.00693544	0.0212584
GHR	-0.754254	2.46891	7.04533	0.00794722	0.023775
NEFM	-0.753682	7.47352	16.3089	5.38103e-05	0.000341839
HAX1	-0.753642	6.99842	24.6432	6.89872e-07	7.51069e-06
MFSD14A	-0.75244	5.30889	8.59618	0.00336868	0.0116566
PPP1R26	-0.752281	2.84572	7.88519	0.00498411	0.0161799
PYGL	-0.751861	6.98519	35.7623	2.22917e-09	4.33641e-08
CENPV	-0.751314	5.85584	25.8433	3.7028e-07	4.35612e-06
LRIG2	-0.751104	4.18402	10.9336	0.000944346	0.00398895
DCAKD	-0.750359	5.04921	14.3627	0.000150756	0.00083031
RPL36	-0.750339	9.45883	18.03	2.17451e-05	0.000155544
PRPF40B	-0.750193	2.48996	6.689	0.00970097	0.0280598
POLR3E	-0.749611	4.77962	21.0878	4.3871e-06	3.84724e-05
SERPINF1	-0.749588	7.03271	26.514	2.61629e-07	3.20841e-06
TMEM203	-0.749161	4.28089	15.87	6.78457e-05	0.000420035
OXLD1	-0.7472	4.6708	14.2703	0.000158341	0.000865414
PATJ	-0.747049	4.54965	16.0081	6.30718e-05	0.0003927
KLF9	-0.746718	6.32037	17.5955	2.7323e-05	0.000189603
PIGT	-0.746389	5.84764	24.181	8.76924e-07	9.21493e-06
SMCO4	-0.746216	3.06975	9.98436	0.00157875	0.00614076
SH3GLB2	-0.746138	4.1936	12.3126	0.000449915	0.00211211
MRPL11	-0.74559	5.68574	22.0047	2.71977e-06	2.51749e-05
NRN1	-0.745098	6.77996	16.243	5.57146e-05	0.000352704
VPS13C	-0.744892	5.81142	20.0346	7.60542e-06	6.24109e-05
SPOUT1	-0.744777	5.44672	18.5708	1.63709e-05	0.000121879
NRSN2	-0.744765	2.72143	7.14416	0.00752087	0.0226988
PTDSS2	-0.744703	4.34721	14.2818	0.000157382	0.000861919
POLRMT	-0.74428	3.66836	8.18315	0.00422812	0.0141391
UCK2	-0.743352	5.43773	22.8766	1.72743e-06	1.692e-05
HINT3	-0.74195	5.40765	23.8293	1.05268e-06	1.08226e-05
CAPN15	-0.741397	4.16133	17.3203	3.15792e-05	0.000215241
CDC45	-0.74137	5.77812	26.9396	2.09911e-07	2.64833e-06
FAF1	-0.74117	5.83076	22.9115	1.69631e-06	1.66471e-05
SLC35E2B	-0.74099	3.62653	13.7293	0.000211132	0.00110837
C2CD5	-0.740959	4.1173	6.78449	0.00919535	0.0267976
FAHD2B	-0.74059	2.00749	5.57313	0.0182381	0.0470866
LSM7	-0.740198	5.94575	27.1173	1.91472e-07	2.44183e-06
CAMKMT	-0.740172	2.90896	7.49652	0.00618183	0.0193235
ARHGDIA	-0.73991	5.47225	18.7117	1.52044e-05	0.000114474
ZNF593	-0.73951	4.52442	15.7095	7.38528e-05	0.000453017
ESPNL	-0.739357	2.33827	7.06182	0.0078744	0.0235986
HEY1	-0.73888	6.88914	32.1134	1.45429e-08	2.35405e-07
ALG9	-0.73872	2.91253	7.73749	0.00540861	0.0173558
EBPL	-0.738624	5.92431	12.743	0.00035734	0.00174226
HAUS4	-0.738226	4.64877	15.6596	7.58259e-05	0.000462713
GPN1	-0.73822	5.43134	23.1459	1.5016e-06	1.4937e-05
ITPRIPL1	-0.738141	4.6437	19.8443	8.40136e-06	6.82121e-05
HGH1	-0.737258	3.14332	10.8184	0.00100494	0.00420665
NA..3500	-0.737181	4.21514	18.5193	1.68197e-05	0.000124495
ZNF202	-0.736715	2.70455	7.51186	0.00612941	0.0191946
TMEM9	-0.736643	6.53374	24.6917	6.72736e-07	7.36072e-06
CUTC	-0.736591	4.17964	14.8523	0.000116268	0.000664282
LIAS	-0.736526	3.87595	9.15835	0.00247586	0.00897431
CUEDC2	-0.736366	5.0984	19.9512	7.94437e-06	6.48107e-05
PIH1D1	-0.736187	5.7604	23.4178	1.3037e-06	1.31736e-05
CD55	-0.735065	5.22752	22.7364	1.85812e-06	1.8073e-05
RPL23AP42	-0.734829	3.87814	6.54082	0.0105427	0.0301116
AC027097.1	-0.734538	2.00138	5.58027	0.018164	0.04694
SCAMP1	-0.734344	6.90999	29.4437	5.75655e-08	8.20857e-07
ATP11A	-0.734161	3.94016	13.1178	0.000292502	0.0014672
USP54	-0.733258	3.76339	14.7343	0.000123771	0.000699846
C1orf43	-0.732835	7.9057	20.3729	6.37255e-06	5.35552e-05
ITGB3BP	-0.732659	7.01158	26.6939	2.38367e-07	2.97552e-06
PIGK	-0.732492	6.56216	29.2646	6.31381e-08	8.9367e-07
NDUFAF4	-0.732025	5.29381	21.5383	3.46824e-06	3.11999e-05
NA..370	-0.731385	2.41593	6.85816	0.00882373	0.0259166
PRRT4	-0.731349	1.82077	5.75395	0.0164516	0.0434206
FAM227B	-0.731342	1.68516	5.90096	0.0151326	0.0405326
SMIM8	-0.731281	3.03574	8.55795	0.00344016	0.0118557
ASPHD2	-0.730864	3.89154	16.5446	4.75201e-05	0.000307747
RARG	-0.73069	3.62424	11.2648	0.000789904	0.00341853
NA..331	-0.729854	6.2196	29.6773	5.10292e-08	7.33109e-07
RPS2P46	-0.729394	4.51345	11.7033	0.000623904	0.00279972
ERCC1	-0.72921	4.25506	13.4182	0.00024919	0.00127925
DHRS13	-0.7291	3.43731	8.53457	0.00348464	0.0119955
CDK18	-0.728935	2.4503	6.99555	0.00817126	0.0243254
KIAA0319L	-0.728506	6.17927	25.2035	5.15889e-07	5.8319e-06
EMP2	-0.728503	6.07394	26.8552	2.19284e-07	2.75752e-06
AL355472.1	-0.728157	1.95264	6.90335	0.00860343	0.0253612
ACSS1	-0.727071	4.34486	17.367	3.08137e-05	0.000210586
SGPL1	-0.726734	5.6068	21.3957	3.73602e-06	3.33933e-05
ACVR1	-0.726579	3.10778	8.73401	0.00312329	0.0109709
TATDN1	-0.725742	5.9976	26.7608	2.30263e-07	2.87904e-06
SQLE	-0.725394	7.40304	27.4611	1.60286e-07	2.09644e-06
POLR1D	-0.725277	6.44094	31.1796	2.35221e-08	3.65319e-07
TC2N	-0.725133	4.03672	14.4063	0.000147311	0.000814327
ARHGAP19	-0.725127	5.18499	18.9279	1.35751e-05	0.000103632
SMG9	-0.724487	2.89745	6.86848	0.00877293	0.025802
CINP	-0.724267	4.68924	19.6911	9.10228e-06	7.29754e-05
NA..1108	-0.724266	5.66769	24.3736	7.93493e-07	8.45271e-06
RANGRF	-0.723398	5.18733	20.722	5.31013e-06	4.55761e-05
SLCO4C1	-0.723275	2.91179	9.96815	0.00159271	0.00618093
SPRYD7	-0.723076	5.04639	16.598	4.62003e-05	0.000299706
ZNF391	-0.722641	3.46796	12.4651	0.000414625	0.00197201
RCC1	-0.722499	6.19248	20.3018	6.61389e-06	5.53408e-05
RNF123	-0.722075	4.22287	14.4648	0.000142807	0.000792286
ECI2	-0.72188	5.9016	27.5701	1.51504e-07	1.99006e-06
FUT11	-0.721456	5.16264	21.7196	3.15558e-06	2.86563e-05
PKP4	-0.721246	5.74788	25.714	3.95953e-07	4.61213e-06
ARRB2	-0.72115	6.15826	17.7914	2.4649e-05	0.000173402
DLL3	-0.721058	4.37102	17.0963	3.55319e-05	0.000237432
SPSB3	-0.720959	3.17427	7.36278	0.00665878	0.0205527
ANO8	-0.720162	4.75482	6.64124	0.00996443	0.0287006
BOP1	-0.720127	4.85879	17.8522	2.38738e-05	0.000168723
TMEM126B	-0.719967	5.50481	22.4691	2.13548e-06	2.04465e-05
B3GLCT	-0.71991	4.31812	15.9868	6.37842e-05	0.000396491
RPS8	-0.719109	11.3071	31.1849	2.3458e-08	3.64693e-07
FAT3	-0.719088	4.04449	9.26651	0.00233382	0.0085484
MVB12B	-0.719082	2.91565	9.7928	0.00175196	0.00671732
RAB28	-0.718686	4.30935	15.2361	9.48701e-05	0.00055783
ABI2	-0.718685	6.52323	28.7108	8.40334e-08	1.16049e-06
ULK3	-0.718581	5.11147	20.8121	5.06629e-06	4.36544e-05
KCTD3	-0.718027	7.04651	28.1963	1.09615e-07	1.48174e-06
NIT2	-0.717893	4.97909	21.0165	4.55338e-06	3.97713e-05
COPZ1	-0.717833	6.30417	23.1947	1.46398e-06	1.45913e-05
EGFR	-0.717426	4.16229	13.8036	0.000202942	0.00107162
TOR3A	-0.716585	4.52993	17.8555	2.38325e-05	0.000168509
GPC1	-0.716499	2.99457	7.20476	0.00727106	0.0220753
CARF	-0.716024	2.12394	6.47208	0.0109582	0.0310612
OSBPL1A	-0.715973	6.91917	25.2305	5.08718e-07	5.76785e-06
DYNC2LI1	-0.715816	5.03432	19.7456	8.84648e-06	7.126e-05
SMYD3	-0.715559	3.89414	11.7612	0.000604769	0.00272422
NA..153	-0.714692	5.46522	12.214	0.000474317	0.00221266
LCORL	-0.714665	5.04772	21.5316	3.48047e-06	3.12732e-05
MPDZ	-0.714286	5.04593	21.9812	2.75334e-06	2.53947e-05
ZDHHC12	-0.714191	4.18693	13.8157	0.000201649	0.00106714
TRMT61B	-0.71402	3.57096	11.8755	0.000568761	0.00258557
VSTM4	-0.713989	2.57517	7.58443	0.00588747	0.0185812
ACTR3B	-0.713727	4.04949	14.8562	0.000116027	0.000663399
RPN1	-0.713434	7.03014	22.3753	2.24243e-06	2.13131e-05
AC008443.5	-0.713359	4.52864	16.1628	5.81234e-05	0.000366053
PTK7	-0.713348	5.87111	20.7366	5.26992e-06	4.52564e-05
TUFM	-0.713109	6.92704	21.6786	3.22369e-06	2.9173e-05
VPS36	-0.712586	5.91379	26.0833	3.26992e-07	3.91598e-06
VKORC1L1	-0.712081	6.01603	21.6746	3.23042e-06	2.92148e-05
CFDP1	-0.712064	7.17894	32.9872	9.27658e-09	1.56609e-07
DALRD3	-0.711943	4.2727	12.7597	0.000354168	0.0017312
XRCC3	-0.711667	3.4666	9.83636	0.00171096	0.00659309
CISD3	-0.711383	3.87865	10.6677	0.00109021	0.00448882
LDAH	-0.711041	2.30413	6.51437	0.0107006	0.0304718
PIANP	-0.71079	2.57932	6.92448	0.00850239	0.025122
NUCKS1	-0.710351	11.1561	33.9173	5.75058e-09	1.01791e-07
PFKM	-0.709933	4.69357	17.2755	3.23337e-05	0.000219505
RRP7A	-0.709539	5.40054	20.2815	6.68426e-06	5.58077e-05
SKP2	-0.709317	6.31163	19.4501	1.03262e-05	8.14247e-05
NA..187	-0.709246	5.303	18.9207	1.36268e-05	0.000103923
IFT43	-0.709164	3.95229	10.5597	0.00115578	0.00470445
TMEM223	-0.708931	5.58847	16.6334	4.5345e-05	0.000294906
FAM69B	-0.708737	4.48647	11.6197	0.000652566	0.002902
FZD3	-0.708734	5.59464	24.901	6.03506e-07	6.68435e-06
TPD52L1	-0.70864	2.99582	8.15296	0.0042991	0.0143325
AC005034.3	-0.708593	3.50159	9.36191	0.00221541	0.00817328
RCN1	-0.708168	5.99395	17.5609	2.78248e-05	0.000192911
B4GALNT4	-0.708071	2.98343	6.06821	0.0137637	0.0375214
DUXAP8	-0.707833	3.64489	10.9179	0.00095238	0.00401735
C5orf63	-0.70758	3.08144	10.7319	0.00105304	0.00436388
TMEM161A	-0.707402	5.53585	20.9409	4.73661e-06	4.13012e-05
SETDB1	-0.706886	5.27622	22.4337	2.17524e-06	2.07882e-05
AKAP7	-0.706809	3.84129	12.3019	0.000452497	0.00212185
POLR3C	-0.706565	3.15221	6.83492	0.00893929	0.0262109
LIPT2	-0.705731	1.91152	6.31129	0.0119972	0.0334616
PMPCB	-0.705728	6.24254	30.9592	2.63506e-08	4.05958e-07
ABCB7	-0.705131	5.83161	24.1538	8.89413e-07	9.32545e-06
NA..75	-0.705052	3.23373	9.35395	0.00222506	0.00820493
DHRS7	-0.704789	5.8666	16.4619	4.96365e-05	0.000319027
ERBB2	-0.70476	4.59647	16.2069	5.67865e-05	0.00035846
AL160006.1	-0.704641	3.0781	9.75338	0.00178993	0.00683044
PSMG4	-0.704637	5.24063	19.2247	1.16198e-05	9.05541e-05
MZT2A	-0.704454	5.99741	18.3325	1.85514e-05	0.000135287
DEAF1	-0.704172	5.55952	22.122	2.55864e-06	2.38283e-05
THOP1	-0.703805	4.95737	16.3983	5.133e-05	0.000328671
LINC00909	-0.703665	3.01798	8.68193	0.00321381	0.0112245
MRPS9	-0.703245	6.18789	22.9525	1.66057e-06	1.6339e-05
MCRS1	-0.703205	6.13962	20.3483	6.45493e-06	5.41289e-05
ATP6V0A2	-0.703039	4.84688	18.7026	1.52775e-05	0.000114967
JAM2	-0.702721	2.72328	8.43044	0.00368992	0.0126009
C11orf68	-0.701653	3.82082	11.5701	0.000670202	0.00296666
CHCHD4	-0.701437	5.34141	22.2379	2.40874e-06	2.26247e-05
NA..36	-0.701424	7.89628	25.8355	3.71782e-07	4.37044e-06
SEC63	-0.701284	8.12	27.7334	1.39238e-07	1.84316e-06
TAF6	-0.700736	3.83426	10.0985	0.00148389	0.00581454
LSS	-0.70047	3.57722	11.365	0.000748425	0.00326047
APPL2	-0.700447	3.6944	11.6085	0.0006565	0.00291597
EARS2	-0.700219	4.07603	14.3707	0.000150123	0.000828079
AC007969.1	-0.700057	4.61112	10.7192	0.0010603	0.00438449
NTPCR	-0.699688	6.29082	22.9524	1.66065e-06	1.6339e-05
RPL10A	-0.699514	9.32315	33.1921	8.34909e-09	1.42204e-07
MRRF	-0.69935	4.03527	15.2744	9.29668e-05	0.000548322
SUMO3	-0.699306	7.97457	24.0648	9.31455e-07	9.70651e-06
RFESD	-0.699097	2.34326	5.79018	0.0161159	0.0427111
RNF220	-0.699031	5.74924	19.6711	9.1983e-06	7.35912e-05
AC023043.1	-0.698978	2.22342	7.40626	0.00649975	0.0201526
MCOLN2	-0.698621	3.27195	7.24693	0.00710222	0.0216805
LCLAT1	-0.6983	5.71354	21.3859	3.75514e-06	3.3484e-05
REX1BD	-0.698205	4.17392	14.8551	0.000116093	0.000663531
FAM208A	-0.698153	6.94871	16.3932	5.14688e-05	0.000329141
RPS7P1	-0.697975	3.18821	9.31777	0.00226942	0.00834644
NA..4491	-0.697861	4.31477	16.2954	5.4194e-05	0.000343991
CTSL	-0.697849	6.26658	17.4555	2.94114e-05	0.000202588
INPP5E	-0.69767	3.07699	6.90294	0.0086054	0.0253612
AL035446.1	-0.697643	3.06864	9.17632	0.00245167	0.00889717
MORN4	-0.697244	4.41469	16.2157	5.65224e-05	0.000357144
COA7	-0.697202	5.37129	22.108	2.57735e-06	2.39879e-05
TRAPPC2	-0.696913	4.76184	18.7524	1.48833e-05	0.000112553
TECPR1	-0.696741	3.42849	10.1387	0.00145191	0.00571195
TMEM129	-0.696677	5.06959	13.3232	0.000262135	0.0013405
PYCR3	-0.696519	2.64299	7.62126	0.00576842	0.0182619
ZNF280D	-0.695817	4.41948	15.4043	8.67886e-05	0.000518263
CHCHD10	-0.695713	8.32146	24.1677	8.83017e-07	9.26611e-06
CAT	-0.695699	4.6879	13.7976	0.000203598	0.00107434
MRPL3	-0.695424	6.6416	23.5569	1.21274e-06	1.23358e-05
FAM76A	-0.695365	5.04958	20.4057	6.26419e-06	5.27024e-05
MLLT6	-0.694785	4.52475	16.1001	6.00815e-05	0.000375302
FUT8	-0.694303	4.44135	10.3518	0.00129351	0.00517169
DOLPP1	-0.693758	4.6343	12.0191	0.000526574	0.00242398
FAM161A	-0.692804	5.18202	21.3858	3.75544e-06	3.3484e-05
TMEM8B	-0.692226	3.44013	7.54525	0.00601684	0.0188961
NPAS2	-0.691939	2.06921	5.52221	0.0187766	0.0482767
CIB2	-0.691655	3.63864	8.88869	0.00286943	0.0101936
POLI	-0.691116	2.72991	7.87136	0.0050224	0.0162594
SNX5	-0.690923	8.09783	33.5677	6.88259e-09	1.1881e-07
DCTD	-0.690432	4.10052	11.1879	0.000823346	0.00354524
LINC01184	-0.69031	4.70233	16.9911	3.75548e-05	0.000249427
TMX1	-0.689909	6.92654	25.8642	3.66294e-07	4.31635e-06
NBAS	-0.689847	4.90242	15.0081	0.000107052	0.000618309
RPIA	-0.689103	5.5078	24.0899	9.19431e-07	9.59425e-06
PKIA	-0.688604	3.94276	14.5598	0.00013578	0.000757691
TCTN1	-0.687591	4.15953	16.976	3.78547e-05	0.000251201
FNTB	-0.687406	3.35283	8.9449	0.00278246	0.00993299
ZNF33A	-0.68704	5.86589	22.6861	1.90742e-06	1.84356e-05
CLPP	-0.687002	5.37608	23.34	1.35745e-06	1.3618e-05
PKMYT1	-0.686686	5.5674	17.2012	3.36232e-05	0.000226653
RPL10AP6	-0.686208	2.87819	7.93364	0.00485241	0.0158497
MYO19	-0.685453	4.14112	15.5284	8.12771e-05	0.000490897
IVNS1ABP	-0.685107	6.19315	19.8676	8.29935e-06	6.74501e-05
ATR	-0.68495	4.73999	13.003	0.000310997	0.00154631
TSEN54	-0.68487	4.26263	14.9491	0.000110451	0.000634597
N4BP2	-0.684509	5.10792	13.1616	0.000285748	0.00143945
NREP	-0.684113	3.65508	12.5466	0.000396934	0.00190144
ATIC	-0.683687	6.4893	28.7757	8.1266e-08	1.12735e-06
LINC01003	-0.683366	3.21118	10.0962	0.00148574	0.00581883
NA..353	-0.683218	10.3331	36.8824	1.25474e-09	2.6133e-08
EIF3M	-0.683089	7.4528	26.6547	2.43254e-07	3.01931e-06
DPH2	-0.682682	4.12968	11.3827	0.000741313	0.00323473
FAM35A	-0.682342	4.76347	13.9214	0.000190619	0.00101777
ATP11C	-0.681846	7.15291	22.3299	2.29607e-06	2.17396e-05
RRP9	-0.68177	3.82613	11.8034	0.000591219	0.00267339
RAD9A	-0.681644	2.58526	7.80595	0.00520746	0.0168018
NDUFS8	-0.681144	6.00986	11.8831	0.000566468	0.00257744
UFSP2	-0.680965	4.70058	17.1142	3.5198e-05	0.000235612
FADS1	-0.680915	6.51565	26.2515	2.99722e-07	3.62052e-06
HIP1	-0.680616	5.38612	13.6914	0.00021544	0.00112905
FUOM	-0.680047	4.28701	9.50292	0.00205145	0.00765314
IQGAP2	-0.679713	5.58346	16.7101	4.35477e-05	0.000284424
PNPT1	-0.679682	5.66709	17.6629	2.63725e-05	0.00018384
UGGT2	-0.679577	5.09912	16.5297	4.78932e-05	0.000309378
WDR12	-0.678338	6.6245	19.7354	8.89389e-06	7.14916e-05
KNOP1	-0.678182	6.96544	19.3344	1.09713e-05	8.59047e-05
PSMG3	-0.677575	6.39043	15.3111	9.11778e-05	0.000539222
IL4R	-0.677501	3.35058	9.8176	0.00172849	0.00664395
ERGIC3	-0.677237	6.27903	22.707	1.88681e-06	1.82825e-05
GPAA1	-0.676653	4.98764	17.8653	2.3711e-05	0.000167847
SIRPA	-0.676264	3.60676	10.6342	0.00111013	0.00455476
METTL17	-0.675657	5.20877	7.67261	0.00560652	0.0178489
NPM1	-0.675338	9.96997	21.732	3.13517e-06	2.85047e-05
RGS17	-0.674923	3.82738	12.5386	0.000398632	0.00190778
RAB11FIP4	-0.674229	3.73359	11.8471	0.000577519	0.00261917
TLE2	-0.674048	2.2989	6.56598	0.0103947	0.0297664
NHP2	-0.673955	7.00989	24.4443	7.64902e-07	8.19943e-06
ANKRD29	-0.673787	2.92545	8.03998	0.00457561	0.0151
CDK4	-0.67378	7.52953	26.4749	2.66988e-07	3.26368e-06
GRK3	-0.673338	4.74596	13.6279	0.000222844	0.00116229
PIGV	-0.67328	3.34153	11.5573	0.000674853	0.0029838
DNPEP	-0.672909	3.8914	10.7157	0.0010623	0.0043892
TSTD2	-0.672823	4.44198	14.7592	0.000122152	0.000692995
RRP15	-0.672818	6.69993	29.2903	6.23058e-08	8.82703e-07
SMARCAL1	-0.672611	3.33024	10.485	0.00120346	0.0048688
ZSCAN9	-0.672328	2.9069	6.14998	0.0131413	0.0360687
SOX21.AS1	-0.672086	2.43348	7.40968	0.00648738	0.0201224
RPSA	-0.672048	8.19197	31.1149	2.43203e-08	3.76192e-07
TMEM69	-0.671854	4.59742	13.7488	0.000208953	0.00109957
PRKCZ	-0.671489	3.34549	7.13207	0.00757174	0.0228299
XIST	-0.671385	9.87584	20.931	4.76127e-06	4.14926e-05
EIF5A	-0.671266	6.0587	8.38505	0.00378319	0.0128758
XYLT2	-0.670803	3.8484	12.9163	0.000325733	0.00161122
NXT1	-0.67073	4.69804	17.1857	3.38981e-05	0.000228105
RPL18A	-0.670727	6.52602	19.1371	1.21658e-05	9.39964e-05
NUBPL	-0.670544	4.88015	20.1445	7.18072e-06	5.94028e-05
ZSWIM5	-0.670406	2.44466	7.16697	0.0074258	0.0224694
ADAT2	-0.670402	3.95027	10.8272	0.00100021	0.00419144
GNPAT	-0.670224	5.8721	21.9791	2.75639e-06	2.54075e-05
PCBP2	-0.670115	8.10401	25.9071	3.58257e-07	4.24072e-06
RPS29	-0.669736	11.336	28.7843	8.09027e-08	1.12333e-06
PPDPF	-0.669375	7.71238	15.3158	9.09514e-05	0.000538299
UMAD1	-0.669321	3.88402	6.0499	0.0139071	0.0378518
PCID2	-0.669156	5.34826	18.5667	1.64059e-05	0.000122021
DLEU1	-0.668894	4.32582	13.2367	0.000274524	0.00139344
CDK14	-0.668882	4.00889	12.1032	0.000503353	0.00233038
EEF1B2	-0.668822	8.44906	29.6183	5.26053e-08	7.54338e-07
CTDNEP1	-0.668494	7.29291	19.2459	1.14915e-05	8.96457e-05
NA..236	-0.667942	4.87089	18.4875	1.71025e-05	0.000126162
SRF	-0.667876	5.76802	8.1672	0.00426546	0.0142452
AC010969.2	-0.667819	3.93151	10.5391	0.00116874	0.00474965
ZFAND4	-0.667443	2.65796	6.49416	0.010823	0.030746
POLR3D	-0.667427	5.31307	22.2016	2.45474e-06	2.29864e-05
ACP6	-0.666971	5.24595	17.0854	3.57366e-05	0.000238591
TARBP1	-0.666799	4.49715	12.5615	0.000393777	0.00188867
CARNMT1	-0.66679	4.84404	9.76336	0.00178024	0.00680022
CELSR3	-0.666576	3.32424	9.38639	0.00218603	0.00808044
RCL1	-0.666147	4.27647	11.4717	0.000706623	0.0031108
ATP6V1E2	-0.666141	4.12669	10.7428	0.00104688	0.0043466
GRTP1	-0.665984	3.07727	8.22833	0.00412415	0.0138487
SND1	-0.665082	6.57428	16.3554	5.25059e-05	0.000334385
UBAC2	-0.66505	5.2012	18.6941	1.53458e-05	0.000115312
AC144530.1	-0.665036	2.58969	6.91975	0.0085249	0.0251671
RNPEPL1	-0.664895	2.60726	6.36496	0.0116395	0.0326184
PLEKHJ1	-0.664768	4.50227	13.3538	0.000257896	0.00131996
GFOD1	-0.664443	4.71238	12.0198	0.000526381	0.00242382
METAP1	-0.664253	6.51873	25.1568	5.28533e-07	5.95289e-06
RGS10	-0.664217	5.31402	18.521	1.68044e-05	0.000124495
SPG11	-0.664209	3.89639	6.99296	0.00818311	0.0243429
INTS10	-0.664104	4.46901	16.7558	4.25116e-05	0.000278131
C1QL1	-0.66409	2.30585	6.43689	0.0111774	0.0315656
MAP2K7	-0.66403	5.60878	20.6868	5.4088e-06	4.62675e-05
NDRG1	-0.663981	5.24056	12.7954	0.000347477	0.00170229
GAL3ST1	-0.663089	2.39618	6.79067	0.00916355	0.0267253
SNRNP35	-0.662799	4.01419	9.58427	0.00196252	0.00738788
RPL13P12	-0.662763	2.69347	6.94068	0.00842572	0.0249388
SLC39A14	-0.662664	5.2874	15.7212	7.33958e-05	0.000450936
GPD1L	-0.662512	4.6804	11.7503	0.000608329	0.00273623
POLD3	-0.662499	5.80742	23.1315	1.5129e-06	1.50299e-05
RAB40C	-0.6624	3.1479	6.64791	0.00992721	0.0286311
FAM149B1	-0.662318	3.94051	12.6869	0.00036823	0.00178909
AC016876.2	-0.662097	3.43631	7.2504	0.00708852	0.0216568
CBY1	-0.66186	6.06998	15.0358	0.000105493	0.000610917
DXO	-0.661767	3.4211	8.00884	0.00465495	0.015319
PRKD1	-0.661705	3.3476	9.9011	0.0016518	0.00638277
RAD17	-0.661594	5.78085	20.1303	7.23424e-06	5.9781e-05
ASPSCR1	-0.661309	2.52868	6.6507	0.00991169	0.0285971
FAM206A	-0.661086	3.60085	7.84306	0.00510161	0.0164984
UBIAD1	-0.660984	4.97401	15.3755	8.81219e-05	0.000524601
WWP2	-0.660516	4.19515	13.2964	0.000265916	0.00135558
UFL1	-0.660156	6.36771	25.4097	4.63587e-07	5.30861e-06
GPT2	-0.659853	5.23263	12.2003	0.000477823	0.00222563
QSOX2	-0.659739	3.62458	7.07934	0.00779776	0.0234147
EXOC2	-0.659277	4.91278	18.6103	1.60354e-05	0.000119731
PMF1	-0.658969	5.11857	13.589	0.00022751	0.00118462
LRRC3	-0.658429	2.78669	6.81385	0.00904536	0.026451
NDUFAF3	-0.657466	7.20804	19.8403	8.41894e-06	6.83186e-05
B4GAT1	-0.657439	6.74163	18.5093	1.69079e-05	0.000124907
PCCA	-0.657104	3.82796	11.1464	0.000841943	0.00361213
PPIH	-0.656933	5.07621	15.0617	0.000104054	0.000603953
TTC21B	-0.65577	3.1721	6.09885	0.013527	0.0369683
SLC13A3	-0.655698	3.23027	8.05538	0.00453687	0.0150109
VPS54	-0.655667	3.68543	9.53478	0.00201614	0.0075525
METTL8	-0.655634	4.90351	16.3241	5.33814e-05	0.000339396
TMEM38B	-0.655169	5.83972	13.1748	0.000283744	0.00143217
MIF	-0.655001	5.17998	5.91001	0.0150551	0.0403744
TOE1	-0.654984	3.568	11.243	0.000799219	0.00345299
SLC16A2	-0.654886	4.67007	16.1004	6.00722e-05	0.000375302
PACSIN3	-0.654351	3.85931	9.60737	0.00193798	0.00730267
ZDHHC17	-0.654247	4.70784	9.8852	0.00166614	0.00643654
POLR2I	-0.654015	5.62353	12.7004	0.000365581	0.00177905
CAMTA2	-0.653271	3.4392	6.93247	0.00846447	0.0250245
LDLR	-0.653199	4.85017	8.5794	0.00339988	0.0117566
RECK	-0.652769	3.63343	8.57585	0.0034065	0.0117662
PAQR8	-0.652544	4.38565	14.8294	0.000117689	0.000671149
TRIM45	-0.652408	2.65685	6.69946	0.0096442	0.0279252
COMMD7	-0.652328	4.45483	13.1059	0.000294372	0.00147513
RPS15	-0.652323	9.92064	17.0713	3.60026e-05	0.000240263
PEX11B	-0.652144	4.62196	16.2452	5.56491e-05	0.000352498
C12orf10	-0.651824	4.95852	13.9307	0.000189677	0.00101384
ANO4	-0.650902	2.08547	5.90185	0.015125	0.0405262
PA2G4	-0.650563	8.8505	22.3945	2.22014e-06	2.11513e-05
ENO1	-0.650166	8.93651	23.5913	1.19128e-06	1.21336e-05
GPR176	-0.649909	3.51746	10.9794	0.000921314	0.00389595
SIRT3	-0.64983	3.30612	7.47036	0.00627229	0.0195582
LEPR	-0.649773	4.95747	14.7978	0.000119674	0.000681708
RPL10AP2	-0.649348	2.48975	6.01836	0.0141578	0.0383776
NA..67	-0.649289	5.23833	12.7069	0.000364303	0.00177339
ZNF536	-0.649256	2.71948	7.11542	0.00764239	0.0230022
NRP2	-0.64923	4.55267	12.1679	0.000486187	0.00225927
SMIM26	-0.649195	5.35532	14.4726	0.000142209	0.000789543
Z95115.1	-0.648914	2.9011	8.42445	0.00370208	0.0126362
NELFA	-0.648755	5.42877	20.5857	5.70199e-06	4.85318e-05
ZNF696	-0.648702	2.73295	5.87565	0.0153517	0.0410334
NOC2L	-0.648451	4.83128	16.1433	5.8727e-05	0.000368794
B4GALT1	-0.64811	5.93906	14.0709	0.000176045	0.000947875
BEND3	-0.648001	2.41249	5.89186	0.015211	0.0407211
ZNF276	-0.647913	3.44316	10.4041	0.00125739	0.00504583
MTRR	-0.647207	4.13615	13.2208	0.000276856	0.00140295
SMPDL3B	-0.647182	3.97853	11.163	0.000834426	0.0035839
IL17RB	-0.646972	2.72641	7.02866	0.00802153	0.0239656
AP000936.3	-0.64647	3.13872	7.72013	0.00546085	0.0174828
GPR107	-0.645985	5.98253	13.68	0.000216747	0.00113474
ACSL3	-0.645858	7.78297	16.7357	4.2964e-05	0.000280851
TNK2	-0.64572	3.14015	6.90692	0.00858627	0.0253162
PCED1A	-0.645433	4.61818	9.20519	0.0024133	0.00878289
TESMIN	-0.645118	2.89633	7.05335	0.00791169	0.0236918
CLGN	-0.645113	7.07938	14.5603	0.000135746	0.000757691
NELFB	-0.645008	4.3679	11.6038	0.000658187	0.00292022
CDT1	-0.644969	6.62495	18.6281	1.58863e-05	0.000118926
ADAM23	-0.644941	4.05974	11.7141	0.000620271	0.00278504
UBE3D	-0.644562	3.39404	8.39137	0.00377007	0.0128397
NUDT10	-0.644432	4.69915	11.3648	0.000748489	0.00326047
SLC25A13	-0.64396	5.29042	17.8198	2.42842e-05	0.000171151
ELP4	-0.643914	3.94591	8.13158	0.00435008	0.0144679
GTF2IRD1	-0.643497	4.62168	12.1559	0.000489335	0.00227166
FRA10AC1	-0.643451	7.7063	25.3767	4.71572e-07	5.37851e-06
ZNF618	-0.643399	5.19806	18.871	1.39864e-05	0.000106242
HPCAL1	-0.643334	4.64415	10.9879	0.000917069	0.00388228
NA..369	-0.642603	9.08954	20.0187	7.66892e-06	6.28647e-05
DAZAP1	-0.64257	6.74656	24.2129	8.62534e-07	9.09339e-06
SEMA4D	-0.642127	3.74093	11.4344	0.000720965	0.00315852
DDX51	-0.642068	4.19089	11.8437	0.000578558	0.0026231
C1orf21	-0.641202	5.00867	16.184	5.74775e-05	0.000362283
EFHC1	-0.641058	3.15925	7.65701	0.00565522	0.0179778
GJA1	-0.641058	4.91944	14.1137	0.000172084	0.000930139
VKORC1	-0.640825	6.60345	16.8365	4.07413e-05	0.000267641
CHCHD3	-0.640793	5.25077	11.2652	0.00078975	0.00341853
RPL29	-0.64055	7.88333	26.6907	2.38764e-07	2.97804e-06
NUDT11	-0.640487	5.40158	15.111	0.000101371	0.000590169
CMTM7	-0.64006	4.97408	12.517	0.000403266	0.00192695
HAUS5	-0.639704	4.80213	16.4244	5.063e-05	0.000324867
PLD6	-0.639414	4.30321	10.6568	0.00109664	0.00450924
MAGOHB	-0.638925	5.27453	17.2533	3.27122e-05	0.000221291
LGALSL	-0.638802	4.1994	11.487	0.000700853	0.00308718
VAV2	-0.638753	3.34536	8.39842	0.00375548	0.0127985
ERI3	-0.638622	3.34423	8.65068	0.0032694	0.011385
MYCL	-0.638321	2.96563	6.75773	0.00933425	0.0271559
AP1AR	-0.638208	5.54687	11.6746	0.000633593	0.00283489
ENOSF1	-0.638107	4.67364	11.7014	0.000624529	0.0028017
SEPT01	-0.638012	2.40463	5.72789	0.0166975	0.0438882
LIPA	-0.637377	6.73609	24.7992	6.36239e-07	7.0064e-06
ST3GAL6	-0.636948	4.15618	12.7658	0.00035302	0.00172626
OAZ1	-0.636879	8.74439	17.8324	2.41237e-05	0.000170176
SESTD1	-0.636791	5.65004	21.3849	3.75709e-06	3.3484e-05
ENPP1	-0.636427	6.20321	13.378	0.000254598	0.00130395
ZNF580	-0.636201	4.33559	10.5441	0.0011656	0.00473812
AP3M2	-0.636012	4.86467	14.2725	0.000158161	0.000865131
PARP11	-0.636005	3.56566	10.015	0.00155269	0.00605011
NA..162	-0.635918	4.4318	12.7656	0.000353046	0.00172626
TMCC1.AS1	-0.635895	3.34374	8.46921	0.00361209	0.0123787
RYK	-0.635748	5.29348	12.1795	0.000483184	0.00224855
SLC25A43	-0.635529	2.75822	5.88224	0.0152943	0.0408943
ADPGK	-0.634942	4.40877	10.1528	0.00144082	0.00567599
FASTKD2	-0.634794	4.08066	12.3136	0.000449678	0.00211186
IGSF8	-0.634777	3.2612	7.40026	0.00652145	0.0202143
VASH1	-0.634725	3.82939	9.60635	0.00193905	0.00730492
MTDH	-0.634722	9.60228	19.9636	7.89299e-06	6.44601e-05
TDP1	-0.634699	4.73078	15.0296	0.000105839	0.00061246
ALG5	-0.63455	6.13937	22.2559	2.3862e-06	2.24491e-05
PEX1	-0.634248	5.01275	16.1382	5.88835e-05	0.000369474
FANCC	-0.633891	3.44635	8.95899	0.00276108	0.00986586
COLGALT2	-0.633782	3.26953	6.56864	0.0103791	0.0297331
RPS6KA5	-0.633581	5.35466	13.5594	0.00023113	0.00120192
MYO9A	-0.6334	5.54694	18.1438	2.04838e-05	0.000147624
CHTF18	-0.632733	3.33317	9.09539	0.00256254	0.00924482
ZC3H6	-0.632188	5.15479	11.2012	0.000817446	0.00352281
EIF6	-0.632121	5.74766	10.6682	0.00108991	0.0044888
POPDC3	-0.632014	4.28501	13.2441	0.000273432	0.00138835
INTU	-0.631188	4.37177	13.1398	0.000289091	0.00145342
ACOT2	-0.631158	4.02278	10.3298	0.00130896	0.00521441
AC012146.1	-0.631134	3.51751	10.0177	0.00155042	0.00604281
TUBB	-0.630719	9.5528	26.066	3.29941e-07	3.94514e-06
RFFL	-0.630664	3.07469	7.75209	0.00536505	0.0172257
SNRNP40	-0.630371	4.48029	7.66097	0.00564281	0.0179458
POLD1	-0.630339	3.67995	8.2787	0.00401127	0.0135298
SLC1A3	-0.630175	3.68713	6.12313	0.0133424	0.0365748
REPS1	-0.630034	5.92792	20.5239	5.88924e-06	4.97663e-05
ADGRE5	-0.629689	2.74764	5.6493	0.0174623	0.0454638
HMG20B	-0.628901	4.8295	18.1513	2.04035e-05	0.000147142
ALG6	-0.628766	4.63871	13.4378	0.000246605	0.00126768
SETDB2	-0.628733	3.33444	8.46718	0.00361612	0.0123869
AC243964.3	-0.628662	2.76786	6.40936	0.011352	0.0319764
ARL10	-0.628659	6.26779	22.3037	2.32759e-06	2.19973e-05
CACFD1	-0.62846	2.68984	6.51754	0.0106815	0.0304288
SIGMAR1	-0.62734	8.21217	22.7394	1.85527e-06	1.80568e-05
C1QBP	-0.626959	7.97692	12.5678	0.000392447	0.00188407
IARS2	-0.626779	7.0773	10.187	0.00141434	0.00558919
DOCK5	-0.626659	2.9738	6.4992	0.0107923	0.0306703
MCM7	-0.626273	6.85914	18.9306	1.35559e-05	0.000103537
PRKAB2	-0.626182	5.41299	14.0782	0.000175363	0.000944533
TEDC1	-0.625809	3.4516	8.97243	0.00274084	0.00980498
TTC28	-0.62524	4.61832	11.9091	0.00055861	0.00254511
ORC5	-0.624997	4.97111	11.5608	0.000673585	0.00297991
TM9SF4	-0.624972	5.03765	14.7344	0.000123765	0.000699846
MORN1	-0.62447	2.06118	5.53743	0.0186139	0.0479228
NDUFS7	-0.624466	5.25201	16.6206	4.56533e-05	0.00029666
DDOST	-0.62426	6.05722	14.2807	0.00015747	0.000862094
NA..85	-0.624244	5.16398	17.1846	3.39171e-05	0.000228124
RBMX	-0.624066	8.47143	24.8408	6.2267e-07	6.87178e-06
HTRA3	-0.62368	3.09085	6.27702	0.0122314	0.0339726
FKBP7	-0.623488	4.58873	11.9324	0.000551647	0.00251945
NA..261	-0.623478	2.5736	6.60032	0.010196	0.0292852
SYNGR1	-0.623315	4.92768	12.4415	0.000419903	0.00199155
NDUFS2	-0.623285	7.08473	15.0021	0.000107393	0.000619429
MRPL2	-0.622945	4.48322	9.82861	0.00171818	0.00661925
WDR35	-0.622464	3.42086	8.21042	0.00416506	0.0139585
FEZ2	-0.621426	5.6921	17.2728	3.23783e-05	0.000219711
SPRY1	-0.620537	3.27388	5.58762	0.0180879	0.0467728
ZNF354A	-0.619946	3.92324	9.7485	0.00179469	0.00683838
NA..297	-0.619654	3.14914	7.34953	0.00670803	0.020673
KDSR	-0.619422	5.74743	20.0251	7.6434e-06	6.2689e-05
MYO1D	-0.619262	3.25774	8.5681	0.00342104	0.0118057
DIEXF	-0.619149	4.55399	12.8184	0.000343219	0.00168197
INVS	-0.619136	3.33643	9.74917	0.00179404	0.00683838
NUP210	-0.619087	5.91181	18.9402	1.34883e-05	0.000103123
ZNF395	-0.618927	4.29028	12.0584	0.000515606	0.00237992
CENPM	-0.618815	4.80504	9.58366	0.00196316	0.00738849
SYCP2L	-0.618792	3.29473	8.06964	0.0045013	0.0149158
SLC2A4RG	-0.61867	5.11435	11.9241	0.000554119	0.00252725
CKS1B	-0.618295	6.55507	19.4945	1.0089e-05	7.976e-05
GPCPD1	-0.618293	3.9409	8.08335	0.00446739	0.0148162
KIAA1109	-0.618055	5.16658	12.7451	0.000356944	0.00174096
MRPS22	-0.618017	5.72621	10.0463	0.00152656	0.00596196
MAN2A1	-0.617895	4.69102	7.02717	0.0080282	0.0239751
THAP9.AS1	-0.617888	4.52499	10.185	0.00141591	0.00559104
SSR1	-0.617419	8.30943	26.5744	2.53584e-07	3.13231e-06
NDUFV1	-0.617246	5.93644	15.7403	7.26611e-05	0.000447139
EPHB2	-0.616959	4.65535	6.81438	0.00904268	0.0264482
ELP2	-0.616731	6.55595	18.9725	1.32618e-05	0.000101594
C12orf29	-0.6161	4.84552	13.1023	0.000294934	0.00147717
RMND1	-0.616049	3.73501	8.80616	0.00300215	0.0106037
TMEM161B	-0.616008	5.58234	16.9747	3.78806e-05	0.000251264
NA..4397	-0.61586	3.71533	8.7979	0.00301578	0.0106469
RPS16	-0.615151	10.1643	20.7924	5.11848e-06	4.40793e-05
FKTN	-0.614963	4.94236	11.6222	0.000651679	0.00289936
ISOC1	-0.614545	5.53518	5.6596	0.0173601	0.0452733
RPL5	-0.613528	11.3266	24.5308	7.31296e-07	7.91111e-06
TTC19	-0.613381	7.00341	16.8413	4.064e-05	0.00026714
RPL37P6	-0.61326	2.57072	5.92651	0.0149148	0.0400751
RACK1	-0.613199	10.4473	21.6827	3.21683e-06	2.91435e-05
PRIMPOL	-0.613155	3.54233	6.38101	0.0115348	0.0323722
PPT2	-0.612912	4.2133	13.0553	0.000302432	0.00150832
SH3D19	-0.612839	4.35219	13.2555	0.000271778	0.00138087
RRS1	-0.612265	4.90191	9.75268	0.00179062	0.00683135
CPS1	-0.612118	3.85147	9.19884	0.00242169	0.00880712
NMRAL1	-0.61194	3.91651	9.37243	0.00220274	0.0081324
DUSP28	-0.611731	2.77242	6.41406	0.011322	0.0319164
SLC25A17	-0.611627	5.46519	16.7139	4.34619e-05	0.000283984
QARS	-0.611537	6.6707	17.4595	2.93499e-05	0.000202295
ITPK1	-0.611382	4.55838	12.3195	0.000448258	0.00210584
RNFT2	-0.611277	3.68963	8.03623	0.0045851	0.0151248
ATAD3A	-0.611223	3.97141	7.91042	0.00491508	0.015993
VPS52	-0.61036	3.70144	8.69673	0.00318781	0.0111515
STX10	-0.610162	4.31567	12.0371	0.000521508	0.00240571
ETAA1	-0.609947	4.54174	14.5905	0.000133583	0.000747369
MTA1	-0.609521	6.96968	13.9306	0.000189685	0.00101384
PGRMC2	-0.609158	6.72358	24.3455	8.05155e-07	8.54725e-06
RXRB	-0.609133	4.26751	7.62628	0.00575238	0.0182187
EIF2S2	-0.608835	8.34728	18.9485	1.34294e-05	0.000102725
USE1	-0.60881	3.18442	7.16957	0.00741506	0.0224524
DHCR7	-0.608308	4.86031	11.282	0.000782603	0.00339268
COQ5	-0.607829	4.96977	14.7799	0.000120814	0.000686416
UQCRC1	-0.607607	6.05359	19.0116	1.29926e-05	0.000100016
ABHD14A	-0.607471	3.43287	8.90248	0.00284783	0.0101239
RNF170	-0.607119	4.57659	13.4054	0.000250895	0.00128671
NME4	-0.607115	6.71256	13.5299	0.000234798	0.00121677
DARS	-0.606564	7.60256	26.5271	2.59866e-07	3.19445e-06
PREP	-0.606168	5.28001	14.7875	0.00012033	0.000684938
FAM20B	-0.606159	5.65939	15.6868	7.47439e-05	0.000456877
TAF1B	-0.605675	5.4548	16.4945	4.87921e-05	0.000314522
HYKK	-0.605526	3.33942	9.00369	0.00269436	0.00964671
DHX32	-0.605315	3.76272	7.55901	0.00597109	0.0187756
PRMT6	-0.605289	4.69844	12.9474	0.000320366	0.00158774
BCAS4	-0.605214	3.47895	7.76655	0.00532226	0.0171002
PRDM4	-0.604918	4.87896	13.1659	0.000285087	0.00143753
ANO10	-0.604788	4.61022	14.5513	0.000136397	0.000760581
NDUFA7	-0.603519	6.18738	17.9682	2.24624e-05	0.000159928
[truncated: 2,988 more rows]

## Sheet: DE - U2OS ATM KO v. WT
Gene name	logFoldChange	logCountsPerMillion	LR	PValue	FDR
TRIM59	-9.88988	3.63215	380.928	7.82e-85	3.93e-81
CLN8	-8.01391	1.79838	146.421	1.05e-33	1.06e-30
ARHGEF10	-7.93811	3.81672	420.971	1.5e-93	2.26e-89
SHOX2	-7.87375	3.76238	384.838	1.1e-85	8.29e-82
ZNF597	-6.90511	0.790881	59.0442	1.54e-14	2.19e-12
MAGEC1	-6.87433	2.76687	226.629	3.24e-51	9.76e-48
AC100810.1	-6.44912	0.490044	52.8322	3.63e-13	4.18e-11
ZNF542P	-6.06153	0.233477	41.3288	1.29e-10	9.55e-09
FBXO25	-5.94072	1.87793	137.221	1.08e-31	1.02e-28
AGAP2.AS1	-5.76001	0.0235389	31.8469	1.67e-08	7.68e-07
CDKN2B	-5.69621	-0.0148841	32.9491	9.46e-09	4.61e-07
HRH2	-5.59681	-0.0610677	29.8736	4.61e-08	1.87e-06
FAM43A	-5.32588	1.75512	118.042	1.7e-27	1.22e-24
CAVIN3	-5.27106	-0.237645	24.3874	7.88e-07	2.39e-05
GAL3ST1	-5.20075	-0.28188	23.9238	1e-06	2.92e-05
RAC2	-5.13601	0.637927	46.1225	1.11e-11	1.06e-09
A4GALT	-5.05335	0.562411	44.8644	2.11e-11	1.92e-09
ERICH1	-5.01458	1.79635	100.454	1.21e-23	5.07e-21
SHISA6	-4.95931	-0.422832	19.183	1.19e-05	0.00023565
SYNDIG1	-4.95386	-0.386636	19.7528	8.81e-06	0.000184417
NA..5796	-4.93079	-0.426144	19.0875	1.25e-05	0.000244619
SLITRK3	-4.84304	0.396911	41.6993	1.06e-10	8.06e-09
ST6GAL1	-4.79809	2.09682	116.262	4.16e-27	2.85e-24
ZNF141	-4.69758	-0.53566	15.6061	7.8e-05	0.00115895
TDRP	-4.69194	0.299607	34.6716	3.9e-09	2.05e-07
GREB1L	-4.6064	0.237414	34.8643	3.54e-09	1.88e-07
AL365226.2	-4.50115	0.169128	31.7429	1.76e-08	8.01e-07
NRGN	-4.48973	1.60204	90.8963	1.51e-21	4.85e-19
KIAA1644	-4.39998	1.29284	55.6039	8.86e-14	1.13e-11
ZFP82	-4.39885	0.578488	39.5893	3.13e-10	2.16e-08
AC108676.1	-4.25305	0.0210015	26.6432	2.45e-07	8.36e-06
CSMD2	-4.22443	0.493233	37.2529	1.04e-09	6.28e-08
ENG	-4.21212	1.36898	72.0512	2.1e-17	4.05e-15
TMEM52B	-4.19854	0.498245	34.1364	5.14e-09	2.63e-07
C5orf46	-4.14152	4.06173	305.38	2.22e-68	8.35e-65
SYT4	-4.11764	-0.0604497	21.4117	3.71e-06	8.83e-05
RBFOX3	-4.11476	2.20876	90.1813	2.17e-21	6.82e-19
DAPP1	-3.91708	1.17106	46.5529	8.92e-12	8.67e-10
POTED	-3.90358	-0.153508	19.2227	1.16e-05	0.00023181
POTEC	-3.90117	0.624117	36.6838	1.39e-09	8.21e-08
NFE4	-3.89395	0.265353	28.3522	1.01e-07	3.81e-06
SLC7A7	-3.88917	-0.186623	19.3132	1.11e-05	0.000223444
AC069120.3	-3.88615	-0.187014	18.5682	1.64e-05	0.000311061
LEFTY2	-3.86575	-0.189917	17.5391	2.81e-05	0.000489657
LEFTY1	-3.8129	1.06772	51.5104	7.12e-13	7.78e-11
TRIML2	-3.74145	1.02117	51.742	6.33e-13	7.06e-11
NA..5717	-3.73068	0.173918	25.0498	5.59e-07	1.76e-05
ZNF280A	-3.68693	-0.282613	16.3406	5.29e-05	0.000840102
C6orf15	-3.67402	1.84788	63.473	1.63e-15	2.63e-13
CLEC7A	-3.65723	0.723651	39.0968	4.03e-10	2.75e-08
ART5	-3.57211	3.569	86.2416	1.59e-20	4.36e-18
RBM23	-3.43454	3.25911	151.262	9.19e-35	1.06e-31
C1orf186	-3.42757	-0.0187097	19.8536	8.36e-06	0.000177404
TNFAIP6	-3.41908	-0.389401	12.9676	0.000316926	0.00367859
GABRG1	-3.39106	-0.0547543	18.1888	2e-05	0.000364892
AC011352.1	-3.3856	-0.0265355	18.5637	1.64e-05	0.000311405
ANKRD30BP1	-3.37687	0.939554	37.4322	9.46e-10	5.84e-08
SORCS2	-3.36998	-0.431366	11.9562	0.000544649	0.00567475
LMF1	-3.36046	0.512978	30.3576	3.59e-08	1.5e-06
EPHA3	-3.34288	-0.434552	12.2392	0.000467965	0.00501805
TEK	-3.33048	1.33894	53.9191	2.09e-13	2.44e-11
SLC47A1	-3.32173	-0.0677004	17.347	3.11e-05	0.000534924
COL6A3	-3.26132	4.59191	216.371	5.6e-49	1.2e-45
AQP3	-3.23675	1.04406	22.5758	2.02e-06	5.22e-05
COLEC12	-3.22353	1.97977	69.1833	8.97e-17	1.59e-14
AC106795.1	-3.21907	1.4814	28.4565	9.58e-08	3.63e-06
SLC32A1	-3.18259	0.624726	27.8752	1.29e-07	4.74e-06
LY6H	-3.16749	-0.150696	13.3544	0.00025782	0.00311674
CRHR1	-3.12761	0.557375	24.8694	6.13e-07	1.93e-05
BASP1	-3.12082	1.29346	43.6324	3.96e-11	3.33e-09
CCR1	-3.12026	-0.186935	14.2016	0.000164232	0.00214413
SLCO2A1	-3.10421	0.982677	28.5667	9.05e-08	3.47e-06
SLC24A3	-3.08243	-0.192041	14.4651	0.000142783	0.00192069
PCSK2	-3.05804	0.703067	29.8978	4.55e-08	1.85e-06
R3HDML	-3.01589	-0.539823	8.71417	0.00315746	0.0226813
BFSP1	-2.97244	-0.239032	13.0532	0.000302761	0.00355333
RGS16	-2.96679	3.21331	104.263	1.77e-24	8.09e-22
KCNK10	-2.93751	1.45389	47.1846	6.46e-12	6.36e-10
MEG3	-2.90121	-0.272803	10.9038	0.000959667	0.00888636
NA..179	-2.8929	2.35352	82.057	1.32e-19	3.32e-17
DOC2B	-2.87961	-0.284273	11.6641	0.000637172	0.00646876
AC092376.2	-2.87522	-0.277873	11.7717	0.000601394	0.00618049
PTGFR	-2.8664	3.34139	94.0203	3.12e-22	1.12e-19
IRX4	-2.85093	1.98676	69.309	8.42e-17	1.51e-14
C6orf223	-2.83446	0.163608	16.9482	3.84e-05	0.0006409
C1QTNF12	-2.80499	0.195511	16.3296	5.32e-05	0.000843208
SLC13A3	-2.80368	-0.332464	9.44238	0.00212028	0.016751
PLP1	-2.78323	2.05123	52.1407	5.17e-13	5.9e-11
APOD	-2.76684	-0.325038	10.314	0.00132028	0.0115782
AC009041.2	-2.7636	0.497883	21.9249	2.84e-06	7e-05
DUSP6	-2.7466	1.1448	37.9254	7.35e-10	4.65e-08
HOXA10.AS	-2.73163	0.0924566	14.8078	0.000119041	0.00166216
TLL1	-2.70385	2.59811	85.6387	2.16e-20	5.81e-18
NA..119	-2.67464	1.37247	41.5495	1.15e-10	8.61e-09
CDH11	-2.65965	3.74731	133.73	6.26e-31	5.55e-28
KNDC1	-2.64355	0.10834	12.0486	0.000518316	0.0054342
CD96	-2.58519	-0.156167	11.4782	0.000704177	0.00701198
CORO2B	-2.57223	0.535085	20.4723	6.05e-06	0.000134637
TNC	-2.56878	4.15411	76.3985	2.32e-18	4.72e-16
COL3A1	-2.55895	6.50355	204.199	2.53e-46	4.24e-43
HTR2A	-2.54541	2.20048	43.3043	4.69e-11	3.9e-09
TSPAN2	-2.52845	2.87393	68.5267	1.25e-16	2.19e-14
STMN2	-2.52774	0.199574	15.2437	9.45e-05	0.00136888
CRTAC1	-2.52465	-0.19663	10.0363	0.00153482	0.0131012
CRYGS	-2.52076	0.484838	16.7971	4.16e-05	0.000681938
FAM19A5	-2.50631	4.95612	171.65	3.23e-39	4.42e-36
PTGIR	-2.49448	-0.234005	9.17434	0.00245432	0.0188368
MYOCD	-2.49275	3.69255	107.901	2.83e-25	1.64e-22
AL683807.2	-2.47605	-0.376769	7.04933	0.0079295	0.0455455
EPHA4	-2.46291	3.61765	106.499	5.73e-25	2.7e-22
AC022075.1	-2.43633	3.81971	107.404	3.63e-25	1.89e-22
RGS7BP	-2.40725	-0.242799	9.57173	0.00197597	0.0159198
FAP	-2.40555	2.27104	47.2491	6.25e-12	6.2e-10
MMP9	-2.38071	0.796145	18.4918	1.71e-05	0.000320547
IGFL3	-2.36173	0.887127	22.1875	2.47e-06	6.23e-05
NA..2674	-2.35897	1.01414	24.6286	6.95e-07	2.15e-05
CHRM3	-2.35405	3.35041	79.3166	5.29e-19	1.17e-16
WNT11	-2.33747	0.204133	11.1926	0.000821236	0.00788336
TCIM	-2.33417	0.383666	14.8608	0.000115743	0.00162212
XYLT1	-2.31901	3.12637	59.7751	1.06e-14	1.54e-12
AC011815.2	-2.31119	-0.107521	9.54126	0.00200904	0.0160659
NA..72	-2.29365	-0.292372	7.99868	0.00468115	0.0306369
LINC00052	-2.27887	0.979102	22.2129	2.44e-06	6.17e-05
CCL20	-2.25991	0.0554177	9.60093	0.00194479	0.0157697
IGSF10	-2.2524	3.74416	84.5857	3.68e-20	9.72e-18
LIN7A	-2.2449	0.803268	17.0989	3.55e-05	0.000602018
SGK1	-2.24461	4.28533	127.47	1.47e-29	1.23e-26
ZDHHC22	-2.23836	-0.107713	9.55052	0.00199893	0.0160328
GRIN2A	-2.23413	0.350212	13.1933	0.00028095	0.0033408
C9orf135	-2.23164	1.26644	28.3144	1.03e-07	3.86e-06
BMP6	-2.21964	1.69637	31.6909	1.81e-08	8.18e-07
ACAN	-2.21714	2.21874	43.3143	4.66e-11	3.9e-09
TMEM200A	-2.21011	2.33673	46.247	1.04e-11	1e-09
PRR16	-2.20944	1.62958	28.544	9.16e-08	3.49e-06
AL512625.1	-2.19683	-0.115714	8.72808	0.00313347	0.0225664
HIST1H2BK	-2.18171	2.24978	40.4589	2.01e-10	1.44e-08
CXCL12	-2.1723	0.686391	18.1969	1.99e-05	0.000363846
LRIG3	-2.16617	4.3554	112.883	2.29e-26	1.5e-23
AL157700.1	-2.15873	-0.146519	8.68014	0.00321696	0.0229537
SLITRK6	-2.15785	4.11643	101.791	6.17e-24	2.66e-21
LAMC2	-2.1529	5.03888	119.302	8.99e-28	6.78e-25
AC008079.2	-2.14949	-0.151469	7.8304	0.00513747	0.0329226
SMOC1	-2.1339	4.61179	93.4262	4.22e-22	1.44e-19
CLDN4	-2.10832	3.8304	86.5248	1.38e-20	3.85e-18
CHGB	-2.0759	0.261339	12.0619	0.000514623	0.00540677
ZNF385D	-2.0499	-0.202775	7.44257	0.00636989	0.0385262
NA..2533	-2.04946	0.411579	11.4268	0.000723922	0.00716356
INHBA	-2.04744	7.47565	149.362	2.39e-34	2.57e-31
SDK2	-2.0444	4.87414	79.9434	3.85e-19	8.93e-17
HIST1H3D	-2.04124	1.04595	19.6226	9.43e-06	0.000194982
AC087380.1	-2.03968	2.62083	55.3684	9.99e-14	1.23e-11
ITGB3	-2.03661	2.03047	35.2108	2.96e-09	1.62e-07
HECW2	-2.03439	2.58168	43.057	5.32e-11	4.35e-09
NA..3151	-2.02555	2.77144	44.4701	2.58e-11	2.32e-09
CDH6	-2.01602	0.124378	9.55785	0.00199096	0.0160149
KIAA1210	-2.01366	-0.0590892	7.94269	0.00482821	0.0314066
JAG1	-2.01101	4.22815	97.0844	6.64e-23	2.57e-20
LAMA4	-2.00897	4.3591	97.8898	4.42e-23	1.75e-20
TOX3	-2.00492	0.819399	12.2645	0.00046165	0.00496093
SLC35F1	-2.00009	2.73322	55.5361	9.18e-14	1.14e-11
MEGF11	-1.99808	0.806471	14.3176	0.000154414	0.00204249
LINC01583	-1.99275	2.80697	55.5444	9.14e-14	1.14e-11
CDH13	-1.99062	3.5199	63.2724	1.8e-15	2.89e-13
SEMA3D	-1.98754	2.62325	54.2018	1.81e-13	2.15e-11
EGR2	-1.98494	0.240375	10.6492	0.00110118	0.00998814
SNCAIP	-1.9542	0.42228	9.34012	0.00224191	0.0175463
CUX2	-1.93002	1.24623	24.1033	9.13e-07	2.7e-05
E2F5	-1.92438	0.502683	12.1555	0.000489442	0.00520758
DEUP1	-1.92214	1.24183	21.0188	4.55e-06	0.000105418
NA..3176	-1.92009	2.63993	29.3194	6.14e-08	2.43e-06
MN1	-1.91618	4.79701	106.799	4.93e-25	2.47e-22
AC246817.2	-1.91276	0.0665114	7.69945	0.00552376	0.0346899
LNX1	-1.91191	0.497143	12.3665	0.0004371	0.00473369
AC005863.1	-1.89873	0.688681	12.9037	0.000327939	0.00376867
F11R	-1.89742	1.28819	23.192	1.47e-06	4.02e-05
AC069120.1	-1.89613	0.598528	10.9377	0.00094226	0.0087529
ROBO2	-1.89252	0.365943	7.00216	0.00814112	0.0464072
NA..2938	-1.88124	0.998724	14.1975	0.00016459	0.00214693
ADAMTS16	-1.87259	1.85357	26.8524	2.2e-07	7.62e-06
NA..25	-1.86857	1.77315	31.4389	2.06e-08	9.17e-07
NTRK3	-1.86756	2.83042	54.9607	1.23e-13	1.47e-11
SLC16A9	-1.86441	1.93145	30.4986	3.34e-08	1.4e-06
NPM1P27	-1.85561	-0.11148	7.0263	0.00803211	0.0459007
STXBP6	-1.85273	0.824096	11.9129	0.000557471	0.00578933
NCKAP5	-1.84966	1.92786	24.227	8.56e-07	2.55e-05
NA..191	-1.84634	0.888507	14.1628	0.000167653	0.00217746
TM4SF18	-1.80858	0.00906626	7.07632	0.00781092	0.0450189
NA..2	-1.79804	2.26103	27.2021	1.83e-07	6.44e-06
ONECUT3	-1.79409	1.56589	18.4674	1.73e-05	0.000323866
ZNF235	-1.79395	0.113237	7.03457	0.0079951	0.0458001
FRMPD4	-1.79003	1.01458	12.5953	0.000386714	0.00428085
MYCN	-1.7674	2.14222	27.3131	1.73e-07	6.12e-06
CDK2AP1	-1.76353	1.47e-05	6.87639	0.0087342	0.0489362
ADAMTS8	-1.76163	1.95619	30.17	3.96e-08	1.62e-06
GPR27	-1.76083	4.85154	81.0877	2.16e-19	5.25e-17
LEMD1	-1.75998	0.21372	8.65804	0.00325622	0.0231954
SMCO2	-1.7594	0.125867	7.33535	0.00676116	0.04032
HDAC4	-1.75743	0.403879	9.09653	0.00256095	0.0193594
NA..11	-1.74205	0.11875	7.31754	0.00682849	0.0406151
SHISA2	-1.73752	1.01969	13.8493	0.000198068	0.00249506
PDZRN3	-1.71673	0.66317	11.0837	0.000870908	0.0082783
SLC2A12	-1.71619	6.77867	93.4693	4.13e-22	1.44e-19
NPTXR	-1.69396	4.98939	80.4906	2.92e-19	6.99e-17
IL2RB	-1.69367	1.96664	22.1311	2.55e-06	6.39e-05
DPYSL3	-1.69106	6.19891	119.948	6.49e-28	5.15e-25
HIST1H2AC	-1.69078	5.27263	92.4865	6.78e-22	2.27e-19
CDH23	-1.68676	0.730879	12.0697	0.000512467	0.00539321
GABRG3	-1.66836	1.86482	20.2528	6.79e-06	0.000148961
SOX8	-1.66797	0.413144	9.44273	0.00211988	0.016751
EDNRA	-1.66335	1.36686	19.5125	9.99e-06	0.000203752
KCNK1	-1.65002	6.32963	107.462	3.53e-25	1.89e-22
LINC02086	-1.64963	0.800199	12.8116	0.000344475	0.00389922
AC005381.1	-1.64908	0.481632	8.67103	0.00323309	0.0230524
SORCS1	-1.64762	1.10064	14.9279	0.000111698	0.0015731
FBXL7	-1.63922	0.52606	8.24314	0.00409064	0.0277236
QPCTL	-1.63501	0.684168	9.29213	0.0023014	0.0178819
NA..3475	-1.63249	1.25498	14.8494	0.000116445	0.00163044
HIST1H2BJ	-1.63128	4.68145	76.9192	1.78e-18	3.68e-16
RET	-1.6247	0.297673	7.58846	0.00587432	0.0363189
ADGRL3	-1.62062	4.74652	38.8979	4.47e-10	2.99e-08
WDR83OS	-1.6168	4.2113	71.764	2.43e-17	4.63e-15
ENC1	-1.61503	6.9785	106.651	5.31e-25	2.58e-22
ITGA11	-1.60635	0.893703	11.6766	0.000632916	0.00643984
RASL11B	-1.59906	1.83628	20.1319	7.23e-06	0.00015669
MSANTD2	-1.59787	1.94217	15.5033	8.24e-05	0.00121415
JAM3	-1.59509	5.23551	68.2675	1.43e-16	2.44e-14
ISPD	-1.59258	0.32176	7.35122	0.00670171	0.0400508
CLVS2	-1.57335	0.763896	9.58015	0.00196693	0.0158724
RDH13	-1.57162	0.900599	9.54932	0.00200023	0.0160328
SHISA9	-1.55533	2.896	38.7515	4.81e-10	3.17e-08
HERC3	-1.55523	3.06588	34.946	3.39e-09	1.83e-07
NETO1	-1.55476	2.7064	27.1527	1.88e-07	6.58e-06
HMGB1P5	-1.55319	0.253616	6.91295	0.00855736	0.0481963
ZNF112	-1.54788	1.50898	19.0225	1.29e-05	0.000252119
LGR5	-1.54415	2.13158	19.0123	1.3e-05	0.000253143
PDGFB	-1.52252	5.15331	31.0158	2.56e-08	1.1e-06
MBNL3	-1.51657	2.18781	23.499	1.25e-06	3.54e-05
MAGEL2	-1.51524	1.05766	10.0151	0.00155265	0.0131861
SERPINF1	-1.51375	1.78915	18.264	1.92e-05	0.000353765
CHEK1	-1.513	4.52445	71.0101	3.55e-17	6.69e-15
SYP	-1.51187	0.868556	10.0424	0.0015298	0.013088
PLXNC1	-1.50988	2.49209	23.4558	1.28e-06	3.61e-05
GLRX	-1.50707	3.35825	43.7516	3.73e-11	3.16e-09
PEG10	-1.50684	3.60326	42.5099	7.03e-11	5.55e-09
HES1	-1.50661	7.4254	81.8807	1.45e-19	3.57e-17
MDGA1	-1.50088	1.05346	11.5221	0.000687755	0.00686478
GRAMD4	-1.49909	1.25374	11.3118	0.000770168	0.00748121
COL22A1	-1.4983	1.96078	17.7506	2.52e-05	0.00044307
CNIH3	-1.4982	3.81304	56.338	6.1e-14	8.06e-12
TRAPPC6A	-1.4968	1.37728	14.1585	0.000168036	0.00218056
B3GAT1	-1.48976	2.26355	22.1092	2.58e-06	6.45e-05
PCDH18	-1.48533	3.7664	47.9862	4.29e-12	4.31e-10
FAM198B	-1.48106	5.20071	78.7512	7.04e-19	1.54e-16
SOSTDC1	-1.47392	2.88213	23.1882	1.47e-06	4.02e-05
NA..1580	-1.47315	3.48997	19.5999	9.55e-06	0.000196776
KYAT1	-1.47301	1.95514	18.4936	1.7e-05	0.000320547
AC004825.2	-1.47095	0.770659	9.30237	0.00228858	0.0178006
VCAN	-1.46438	0.552323	8.07781	0.00448106	0.0296481
CLPTM1L	-1.46292	8.66178	102.819	3.67e-24	1.63e-21
FOXP1	-1.45658	5.99738	84.3689	4.11e-20	1.07e-17
LGR4	-1.45243	6.40633	62.0937	3.27e-15	4.98e-13
CA2	-1.45043	0.770861	7.57949	0.0059036	0.0363927
SPRY2	-1.44679	2.49893	30.6562	3.08e-08	1.31e-06
NA..3273	-1.44153	2.25781	15.9668	6.45e-05	0.0009881
BMP2	-1.43352	3.03039	23.1494	1.5e-06	4.08e-05
ZNF461	-1.43105	0.466247	7.24429	0.00711269	0.0418465
TMEM170B	-1.42964	3.13914	36.3839	1.62e-09	9.35e-08
KCTD12	-1.42851	2.84782	33.3002	7.9e-09	3.9e-07
PHLDA1	-1.41998	5.01295	43.1865	4.98e-11	4.12e-09
LINC00511	-1.41955	5.6407	79.7856	4.17e-19	9.53e-17
ABCC9	-1.41751	1.2565	11.5737	0.000668915	0.00672755
IGLON5	-1.41235	2.73411	27.7146	1.41e-07	5.1e-06
F3	-1.4118	4.4631	32.316	1.31e-08	6.19e-07
MCPH1	-1.41039	2.79413	30.222	3.85e-08	1.59e-06
HIST1H3H	-1.41034	1.64997	12.3138	0.000449621	0.0048506
PTPRN2	-1.41019	2.06245	21.9276	2.83e-06	7e-05
MYH15	-1.40899	0.430057	7.04145	0.00796445	0.0456766
PITPNC1	-1.40262	0.893374	9.23459	0.00237485	0.0183862
IER3	-1.4006	8.28344	80.0558	3.64e-19	8.57e-17
CDON	-1.40009	3.15904	31.4564	2.04e-08	9.12e-07
ADGRA2	-1.39936	2.89301	33.3483	7.7e-09	3.83e-07
KBTBD11	-1.39585	1.83604	17.2386	3.3e-05	0.000564148
AP000769.1	-1.39505	3.1314	34.4054	4.47e-09	2.34e-07
TWIST2	-1.3901	1.02625	8.84142	0.0029447	0.0214426
FDFT1	-1.38838	6.62128	65.1548	6.92e-16	1.16e-13
THBS1	-1.37818	8.09066	41.846	9.88e-11	7.51e-09
FUT11	-1.37771	5.26339	70.7492	4.06e-17	7.55e-15
NTRK2	-1.3775	0.797175	9.04273	0.00263742	0.0197812
ENHO	-1.37507	1.61446	12.1385	0.000493918	0.00524779
PKN3	-1.37418	2.05479	22.1232	2.56e-06	6.41e-05
NA..2589	-1.37315	0.643873	7.44528	0.0063603	0.0384973
WHAMMP3	-1.37095	0.777235	7.44725	0.00635335	0.0384725
ZBTB34	-1.36685	1.8292	17.3971	3.03e-05	0.000522808
NPFFR1	-1.36638	2.6603	23.9832	9.72e-07	2.84e-05
ZBED8	-1.35757	1.76722	15.3877	8.76e-05	0.00128442
MAN1A2P1	-1.35135	0.741512	7.52288	0.00609202	0.0372342
ADGRL4	-1.34335	0.952359	8.91008	0.00283601	0.0208731
ATP2B3	-1.33661	1.2726	12.046	0.000519041	0.00543802
PRAME	-1.32896	6.82961	62.4869	2.68e-15	4.21e-13
EI24	-1.32841	6.31291	74.4514	6.21e-18	1.22e-15
MAF	-1.32769	4.65486	52.0288	5.47e-13	6.2e-11
SLIT3	-1.32569	1.6409	14.6276	0.000130982	0.00178731
EYA2	-1.31358	0.913218	7.88967	0.0049718	0.0321757
AC018558.1	-1.31142	0.617065	6.98535	0.00821796	0.0466907
COL1A1	-1.3114	10.4611	63.1078	1.96e-15	3.1e-13
PODXL2	-1.30402	2.10294	14.4065	0.000147295	0.00197082
HIST2H2BE	-1.30297	4.18415	43.909	3.44e-11	2.94e-09
STT3A	-1.29647	6.59986	60.4741	7.46e-15	1.1e-12
NFATC2	-1.29564	1.24831	11.1967	0.000819408	0.00787322
SIAE	-1.29562	3.28101	22.8301	1.77e-06	4.69e-05
DHFR2	-1.29526	4.05129	42.2163	8.17e-11	6.31e-09
EGR1	-1.29465	5.33109	51.2261	8.23e-13	8.8e-11
AC006504.1	-1.29359	2.6344	15.7636	7.18e-05	0.00108584
C9orf16	-1.29296	2.70503	21.8624	2.93e-06	7.19e-05
FBXL16	-1.29145	3.18749	31.0997	2.45e-08	1.07e-06
CPT1A	-1.29093	1.09026	9.93494	0.00162171	0.0136214
NOG	-1.29008	7.87732	66.8375	2.95e-16	4.99e-14
TOX	-1.28477	2.31622	18.4878	1.71e-05	0.000320829
SPSB4	-1.28207	1.5919	13.9475	0.000187992	0.00238609
COL4A1	-1.27658	6.47729	44.2823	2.84e-11	2.52e-09
SYNPO	-1.27516	5.41812	53.1684	3.06e-13	3.55e-11
TMED9	-1.26527	7.50401	61.8501	3.71e-15	5.58e-13
DHPS	-1.26306	2.14104	17.2318	3.31e-05	0.000565137
KRT17	-1.26189	6.61169	57.7491	2.98e-14	4.08e-12
TCTEX1D2	-1.26151	2.50684	22.3093	2.32e-06	5.93e-05
ADAM19	-1.25629	5.90883	63.83	1.36e-15	2.22e-13
PBLD	-1.25043	1.44304	11.8025	0.000591526	0.00608322
ZNF227	-1.24746	2.76706	15.7429	7.26e-05	0.00109573
EDN1	-1.24133	4.24592	32.8292	1.01e-08	4.84e-07
PPM1E	-1.23953	1.6594	8.73815	0.0031162	0.0224792
NCOR1P1	-1.23455	0.995257	7.94238	0.00482902	0.0314066
C1QTNF3	-1.23296	1.2287	9.92342	0.00163189	0.0136675
CAPG	-1.22603	1.69627	8.99506	0.0027071	0.0201907
H2AFY2	-1.22421	4.29797	44.8023	2.18e-11	1.97e-09
PIK3IP1	-1.2233	3.9829	28.4644	9.54e-08	3.62e-06
GPR19	-1.22267	2.49902	12.8495	0.000337569	0.00385581
PIGF	-1.22073	2.80927	20.2443	6.82e-06	0.000149248
THOC3	-1.22026	2.59427	10.1001	0.00148259	0.0127732
CLSTN2	-1.21784	3.94208	32.9102	9.65e-09	4.68e-07
FOXRED1	-1.21273	1.29404	9.3238	0.00226196	0.0176574
CA8	-1.20512	1.0604	8.51546	0.00352142	0.0245963
CALHM5	-1.20096	3.19753	26.0435	3.34e-07	1.12e-05
TMSB4X	-1.19859	7.36129	34.9357	3.41e-09	1.83e-07
FOXC1	-1.19817	4.63908	29.3978	5.89e-08	2.34e-06
CYR61	-1.19331	8.1632	29.7301	4.97e-08	2.01e-06
IFI44L	-1.19038	1.81619	12.1232	0.000497979	0.00527606
SDC2	-1.18833	7.40795	56.7761	4.88e-14	6.57e-12
PRDM1	-1.18487	3.26124	28.6662	8.6e-08	3.33e-06
CSMD1	-1.18454	3.09154	21.9774	2.76e-06	6.84e-05
SNURF	-1.1828	1.73269	11.3967	0.000735748	0.00724022
PXN.AS1	-1.18034	1.53227	9.9432	0.00161445	0.0135808
ARV1	-1.17835	3.08703	23.739	1.1e-06	3.2e-05
SLC16A2	-1.178	3.89735	33.4743	7.22e-09	3.64e-07
TGM2	-1.17629	4.27946	38.699	4.94e-10	3.24e-08
PEG3	-1.17361	4.87228	51.7251	6.38e-13	7.07e-11
AL118516.1	-1.17063	2.6373	15.7012	7.42e-05	0.00111198
FKRP	-1.16881	3.09796	16.6213	4.56e-05	0.000740892
FAM173B	-1.16712	2.15635	14.8829	0.000114393	0.0016062
MAP2K6	-1.16645	2.22451	14.0451	0.000178474	0.00229623
NFYA	-1.16186	3.69222	25.2914	4.93e-07	1.6e-05
RCN3	-1.15941	2.86784	13.8431	0.000198726	0.00250126
EFCAB2	-1.15559	1.02861	6.94812	0.00839071	0.0474443
ETS1	-1.15351	4.62218	41.3332	1.28e-10	9.55e-09
GDF7	-1.15318	1.99966	12.0604	0.000515053	0.00540752
HIST1H1A	-1.15206	4.84959	22.1965	2.46e-06	6.21e-05
IGFBP7	-1.15007	8.00988	57.5279	3.33e-14	4.52e-12
ADCYAP1R1	-1.14727	1.29821	8.98897	0.00271614	0.0202389
LIF	-1.14682	1.56517	8.11625	0.00438703	0.029181
MKL1	-1.1462	2.76071	14.7354	0.000123704	0.00170717
FAM118B	-1.14579	1.87551	12.6769	0.000370193	0.0041283
FOXP1.IT1	-1.14526	1.51339	9.36647	0.0022099	0.0173408
LRRC15	-1.14351	1.87427	11.5113	0.000691741	0.00689727
AC124864.2	-1.14314	2.56835	19.5744	9.68e-06	0.000198869
KPTN	-1.14265	1.43241	8.31058	0.00394149	0.0269064
ZBTB43	-1.14203	4.11791	35.9913	1.98e-09	1.12e-07
KRCC1	-1.14177	1.44604	9.03401	0.00265003	0.0198239
SEMA3E	-1.13491	5.89843	50.9002	9.72e-13	1.02e-10
PLEKHG1	-1.13428	3.06878	21.015	4.56e-06	0.000105465
FAM105A	-1.13392	3.73186	29.2414	6.39e-08	2.51e-06
STXBP1	-1.13132	2.58779	18.1188	2.08e-05	0.00037627
VSTM4	-1.12959	2.40094	13.0736	0.000299487	0.00352505
TMEM100	-1.12767	2.09321	14.2261	0.000162108	0.00212199
LRMDA	-1.12664	1.84365	10.0265	0.00154307	0.013127
CCL2	-1.12433	2.76174	16.3514	5.26e-05	0.000837078
FAM173A	-1.12349	3.12683	24.0619	9.33e-07	2.75e-05
CDK9	-1.1221	2.46094	14.6639	0.000128481	0.00176133
AGPAT5	-1.12128	5.62107	44.2579	2.88e-11	2.52e-09
SMIM26	-1.1174	3.63962	24.589	7.1e-07	2.19e-05
GADD45B	-1.11416	4.66239	41.9876	9.19e-11	7.02e-09
PDE6D	-1.10918	1.43909	8.67971	0.00321771	0.0229537
MEX3B	-1.10854	2.64332	17.8735	2.36e-05	0.000419445
THOC6	-1.10824	2.21922	8.32645	0.00390719	0.0267328
BTNL9	-1.10742	3.0427	22.7118	1.88e-06	4.91e-05
ROR1	-1.1045	5.90204	31.9802	1.56e-08	7.24e-07
MYH9	-1.10085	7.56	59.7396	1.08e-14	1.55e-12
SRPRA	-1.09882	5.0093	37.3871	9.69e-10	5.93e-08
HNRNPA3P6	-1.09745	2.60764	17.2247	3.32e-05	0.000566446
DTWD2	-1.09688	2.37134	16.2202	5.64e-05	0.000883144
KLRG1	-1.09453	1.24018	7.79746	0.00523197	0.0332594
LOXL4	-1.09385	5.37439	38.5073	5.45e-10	3.52e-08
TPM1	-1.09183	8.31802	55.9077	7.6e-14	9.86e-12
LENG1	-1.0914	2.36355	16.4819	4.91e-05	0.000793984
LTBP1	-1.09	6.58941	51.3387	7.77e-13	8.42e-11
SNORA79B	-1.08916	3.86756	15.6434	7.65e-05	0.0011408
OLFM2	-1.08767	1.8091	10.5309	0.00117395	0.0105215
PRRX1	-1.08724	2.29555	11.1268	0.000850893	0.00811364
ELFN2	-1.08642	4.53181	33.5426	6.97e-09	3.54e-07
PRKCA	-1.08477	5.65484	43.1694	5.02e-11	4.13e-09
SOBP	-1.08429	2.2246	14.292	0.000156528	0.00206502
HSD17B3	-1.0842	1.9716	9.19675	0.00242445	0.018681
HHIP	-1.08283	2.16117	14.7992	0.000119588	0.00166628
LRRN1	-1.07841	4.49325	21.0507	4.47e-06	0.000103833
PCDH7	-1.07839	4.82293	31.0258	2.55e-08	1.1e-06
ZNF175	-1.07807	2.30972	12.4359	0.000421156	0.0045946
TMEM185A	-1.07618	1.68211	9.13234	0.0025113	0.0191087
THYN1	-1.07559	3.5011	27.5845	1.5e-07	5.41e-06
ZNF548	-1.07557	1.47061	6.99762	0.0081618	0.0464372
ABCA13	-1.07535	1.45134	8.59888	0.00336369	0.023781
CASP9	-1.07511	1.67577	8.32147	0.00391791	0.0267706
XXYLT1	-1.0728	2.79463	15.9231	6.6e-05	0.00101003
SGMS1.AS1	-1.07253	1.77675	9.52499	0.00202693	0.0161575
SLC12A7	-1.07164	4.68738	35.3407	2.77e-09	1.52e-07
MAML1	-1.07052	4.51863	33.3847	7.56e-09	3.77e-07
ZFAND4	-1.06356	2.76701	15.0538	0.000104492	0.00148797
PTHLH	-1.06107	3.04356	14.7133	0.00012516	0.00172207
TNFRSF11B	-1.06014	5.26568	22.2915	2.34e-06	5.96e-05
RPUSD4	-1.05966	3.23998	20.5848	5.7e-06	0.000127705
TUBA1A	-1.05939	6.43066	38.6681	5.02e-10	3.28e-08
NEXMIF	-1.05749	1.61613	9.35205	0.00222736	0.0174428
LRP11	-1.05693	2.08167	10.9921	0.000915023	0.00857518
H1F0	-1.05618	6.73054	45.7143	1.37e-11	1.27e-09
JUNB	-1.05581	3.30577	20.468	6.06e-06	0.000134739
PABPC4L	-1.05541	4.98126	35.4586	2.61e-09	1.44e-07
NUS1	-1.0545	3.0178	21.151	4.24e-06	9.93e-05
NME4	-1.05319	5.18048	33.2935	7.92e-09	3.9e-07
UBTD2	-1.05059	5.37491	37.9765	7.16e-10	4.55e-08
SERPINE2	-1.04845	6.7661	25.2324	5.08e-07	1.64e-05
MTSS1	-1.04756	1.64694	9.53598	0.00201483	0.0160866
SPA17	-1.04598	2.92687	17.4266	2.99e-05	0.000515947
TMEM17	-1.04406	2.16384	9.96085	0.00159904	0.0134809
CMBL	-1.0438	3.43179	23.3089	1.38e-06	3.84e-05
SKIL	-1.04321	6.74715	51.119	8.69e-13	9.22e-11
TMSB4XP4	-1.0418	1.768	9.10121	0.0025544	0.0193293
NOX4	-1.04101	1.72521	9.17341	0.00245556	0.0188368
NOS1	-1.03994	2.27757	11.5583	0.000674471	0.00676537
CLGN	-1.03826	5.2837	25.1805	5.22e-07	1.67e-05
ADAMTS15	-1.03445	2.93492	13.5368	0.000233932	0.00286073
RNF130	-1.03395	3.31097	10.3451	0.00129821	0.0114379
PHF21B	-1.03153	1.69559	7.73414	0.00541863	0.034215
NA..373	-1.03126	9.74375	55.2196	1.08e-13	1.32e-11
TST	-1.0304	2.94311	19.1298	1.22e-05	0.000241454
ARHGAP19	-1.02876	2.61124	15.7423	7.26e-05	0.00109573
ZNF346	-1.02706	2.41949	12.0994	0.000504384	0.00533642
FGFBP3	-1.02571	1.9193	10.0702	0.00150688	0.012936
CHMP5	-1.02571	5.67602	38.759	4.79e-10	3.17e-08
FOXF2	-1.02445	3.56828	20.9476	4.72e-06	0.00010857
DGKG	-1.02411	1.94249	10.2819	0.00134341	0.0117468
TMEM230	-1.02366	4.45094	31.9224	1.6e-08	7.42e-07
CNFN	-1.02346	2.74789	15.2695	9.32e-05	0.00135159
FOXD1	-1.0217	4.35762	31.4879	2.01e-08	9e-07
PARD6G	-1.02012	3.90386	22.6316	1.96e-06	5.1e-05
ANGPTL2	-1.01982	2.6962	14.2244	0.000162255	0.00212199
DMRTA1	-1.01854	4.1162	24.3837	7.89e-07	2.39e-05
ZNF283	-1.01831	4.98036	30.311	3.68e-08	1.53e-06
AC009506.1	-1.01811	2.79883	16.363	5.23e-05	0.000833737
GLCE	-1.01802	3.71955	20.8082	5.08e-06	0.000115534
SOCS1	-1.01482	2.70515	12.6146	0.000382755	0.00424638
EDIL3	-1.01074	8.26215	36.8173	1.3e-09	7.73e-08
GJA1	-1.0105	5.58917	36.5535	1.49e-09	8.67e-08
CYP7B1	-1.01017	1.43421	7.58882	0.00587312	0.0363189
FOLR1	-1.00842	5.32256	27.1508	1.88e-07	6.58e-06
ADGRB1	-1.00628	2.53974	11.7409	0.000611405	0.00626628
GABRA5	-1.00597	2.40924	12.2794	0.000457988	0.0049286
TSPAN13	-1.00504	4.72087	24.0037	9.61e-07	2.82e-05
RNF24	-1.00438	5.09782	37.7156	8.18e-10	5.1e-08
AL021807.1	-1.00429	1.93438	10.9128	0.000955041	0.00885455
EIF3D	-1.00028	6.27138	44.1297	3.07e-11	2.66e-09
DOLPP1	-0.9986	3.79213	20.9366	4.75e-06	0.000109033
PTGS2	-0.998542	1.79993	9.21115	0.00240546	0.0185754
GABRB3	-0.996844	4.7568	30.2722	3.75e-08	1.55e-06
SNORD13	-0.994611	5.11472	11.8093	0.000589343	0.00606492
ARNT2	-0.991831	2.65348	15.9142	6.63e-05	0.00101379
PRKAR1A	-0.99103	7.23841	45.3961	1.61e-11	1.48e-09
CDHR1	-0.989886	2.27196	10.0593	0.00151582	0.012998
GALNT13	-0.988337	1.55559	7.99905	0.00468019	0.0306369
MED25	-0.987793	3.06143	11.2407	0.000800233	0.00773336
ARFGAP3	-0.987533	5.50406	42.7308	6.28e-11	5.06e-09
NA..324	-0.987288	7.48291	48.7107	2.97e-12	3.02e-10
TRIM52.AS1	-0.983916	2.16551	10.6219	0.00111757	0.0101004
BHLHE40	-0.982553	4.12583	21.9127	2.85e-06	7.04e-05
CXCL14	-0.982338	8.32698	34.6923	3.86e-09	2.03e-07
PDE4B	-0.981446	1.95342	10.049	0.00152431	0.0130558
PER2	-0.980952	2.86141	12.387	0.000432345	0.00469287
NUAK1	-0.979798	6.05841	40.4389	2.03e-10	1.45e-08
CCDC117	-0.978686	2.16402	10.3505	0.00129436	0.011435
GUCY1A2	-0.978172	3.95297	21.4916	3.55e-06	8.5e-05
NA..90	-0.97793	1.62185	7.45741	0.00631759	0.0383175
GPRC5D.AS1	-0.977409	2.24207	11.0356	0.000893791	0.00841809
HUNK	-0.975556	4.17133	22.7878	1.81e-06	4.76e-05
ZCCHC24	-0.974879	4.48767	31.5705	1.92e-08	8.65e-07
REEP6	-0.973316	1.66107	7.43309	0.00640352	0.0386986
PANK3	-0.968049	5.95266	42.3035	7.82e-11	6.07e-09
SOX5	-0.967858	3.64201	20.4216	6.21e-06	0.000137844
FAM149B1	-0.966336	1.96847	10.1958	0.00140763	0.0122233
PRICKLE2	-0.964942	2.78017	12.7631	0.000353527	0.00398075
MIAT	-0.964808	1.9029	9.12924	0.00251556	0.0191268
ZNF146	-0.96457	5.27781	26.5463	2.57e-07	8.75e-06
FZD8	-0.964433	3.06612	13.6376	0.000221706	0.00273789
PCDHB5	-0.964138	4.73459	19.8142	8.53e-06	0.000179584
SLITRK4	-0.960575	4.6363	23.2194	1.45e-06	3.97e-05
FBN1	-0.960354	4.79993	28.7549	8.21e-08	3.19e-06
SRD5A1	-0.958758	1.9396	8.38589	0.00378145	0.0260381
FBXL17	-0.956505	4.37225	22.7609	1.83e-06	4.82e-05
RNF217	-0.95641	5.23918	29.7044	5.03e-08	2.03e-06
ZNF503	-0.956004	6.61129	35.0926	3.14e-09	1.71e-07
TRIO	-0.953862	5.35158	34.2828	4.77e-09	2.48e-07
OLFM1	-0.953636	4.18885	20.0457	7.56e-06	0.00016274
TM2D3	-0.953588	4.79467	29.2165	6.47e-08	2.54e-06
UBLCP1	-0.953064	4.99809	28.5555	9.1e-08	3.48e-06
PCDHA10	-0.951269	3.89408	19.679	9.16e-06	0.000190356
PALLD	-0.95025	7.70944	43.8755	3.5e-11	2.98e-09
AF129075.1	-0.949954	1.61613	7.0916	0.0077446	0.0447222
LPL	-0.947192	4.27692	24.5291	7.32e-07	2.26e-05
DTD1	-0.947159	3.8923	24.09	9.19e-07	2.71e-05
KIF24	-0.944602	2.93263	15.3697	8.84e-05	0.00129296
CCDC134	-0.941864	2.52912	8.44016	0.00367024	0.0254351
BDH1	-0.938853	2.84728	14.8684	0.000115277	0.0016171
MAT2B	-0.936495	4.65887	26.6899	2.39e-07	8.22e-06
MPST	-0.935165	4.22377	28.3796	9.97e-08	3.77e-06
NA..370	-0.934548	2.41718	10.9658	0.000928076	0.00865783
MAGEF1	-0.934229	5.59596	37.1978	1.07e-09	6.43e-08
ZSCAN9	-0.932656	2.49843	12.5475	0.000396743	0.0043694
ZNF230	-0.931974	1.42184	7.13597	0.00755526	0.0438135
IL17RD	-0.931495	3.26472	17.8748	2.36e-05	0.000419445
MAN1A1	-0.930555	5.95159	18.8335	1.43e-05	0.000275864
GON7	-0.930171	2.44394	11.2583	0.00079268	0.00767021
MSL3P1	-0.928623	2.86211	14.0867	0.000174576	0.00225109
ZNF134	-0.926826	2.40803	12.1015	0.000503801	0.00533399
CENPV	-0.926107	3.25852	18.2423	1.95e-05	0.000356934
SLC25A17	-0.925957	3.56005	14.6059	0.000132501	0.00180196
ANKRD18A	-0.924594	3.57224	16.2552	5.54e-05	0.000871512
PDLIM7	-0.924404	4.46081	23.2804	1.4e-06	3.88e-05
SAMD8	-0.92147	4.88868	20.7973	5.11e-06	0.000116018
HMGCS1	-0.920076	7.41761	36.5329	1.5e-09	8.73e-08
COL4A2	-0.917304	7.67645	21.8474	2.95e-06	7.23e-05
RFC4	-0.915952	5.47558	36.0128	1.96e-09	1.11e-07
MTAP	-0.914743	5.55358	36.5813	1.46e-09	8.58e-08
PIGO	-0.914055	4.27167	17.8704	2.36e-05	0.000419637
SLC35F3	-0.913427	2.02285	7.63728	0.00571741	0.0356211
EID2	-0.911887	4.36512	25.0864	5.48e-07	1.73e-05
NEDD1	-0.911338	5.73448	28.5431	9.16e-08	3.49e-06
TMEM2	-0.911267	7.30532	22.7985	1.8e-06	4.75e-05
ERMARD	-0.909249	2.07913	9.04155	0.00263912	0.0197816
SELENOS	-0.90923	5.9222	32.738	1.05e-08	5.04e-07
KCTD17	-0.908924	2.80688	11.6997	0.000625102	0.00638049
SIRT1	-0.908711	4.36624	21.544	3.46e-06	8.31e-05
HNMT	-0.908652	1.97986	8.13189	0.00434934	0.0290301
AKAP3	-0.90832	1.75421	7.36789	0.0066399	0.0397129
ARHGEF1	-0.907298	2.27359	8.48472	0.00358141	0.0249457
LINC00662	-0.906826	7.14066	25.2238	5.1e-07	1.64e-05
MYH14	-0.905555	3.30517	14.6375	0.000130293	0.0017813
FAF2	-0.90516	5.96165	35.8017	2.18e-09	1.22e-07
MAP2K1	-0.904946	4.14481	23.24	1.43e-06	3.94e-05
NUP188	-0.904178	4.06808	21.6677	3.24e-06	7.85e-05
JKAMP	-0.901255	5.62688	19.5452	9.82e-06	0.000201312
KCND3	-0.900626	2.51537	11.361	0.000750026	0.0073567
RUNX3	-0.898462	2.03319	8.56083	0.00343473	0.0241811
ALDH16A1	-0.898083	2.75734	12.0706	0.000512233	0.00539321
ERVK3.1	-0.897915	3.18761	14.9373	0.000111147	0.00156792
FGFR1	-0.89653	7.10747	32.1719	1.41e-08	6.64e-07
TEKT4P2	-0.896361	1.67334	7.50957	0.0061372	0.0374496
TOMM22	-0.893676	5.10268	30.855	2.78e-08	1.19e-06
EIF4E3	-0.892287	2.30358	9.98493	0.00157827	0.0133585
NRSN2	-0.890555	2.25938	10.6271	0.00111443	0.010084
RHBDL3	-0.889193	1.81026	7.48707	0.00621435	0.0378454
CSNK2A1	-0.88867	6.16954	36.096	1.88e-09	1.08e-07
PCSK5	-0.888614	4.67421	17.477	2.91e-05	0.000504745
CD200	-0.886709	2.94853	11.2975	0.000776121	0.00752455
SMDT1	-0.884905	3.88141	16.17	5.79e-05	0.000902164
FGFR4	-0.883827	3.52159	14.34	0.000152587	0.00202365
ZCCHC14	-0.882475	4.48743	21.6475	3.28e-06	7.91e-05
ATF7IP2	-0.881173	2.76182	13.239	0.000274182	0.00327064
PIM3	-0.880622	5.62069	33.7894	6.14e-09	3.13e-07
SLCO4C1	-0.880332	4.77104	24.0977	9.16e-07	2.71e-05
MARC2	-0.880241	1.80537	6.94778	0.00839234	0.0474443
NOV	-0.880076	6.6946	37.1495	1.09e-09	6.57e-08
IL7R	-0.879264	4.76758	22.432	2.18e-06	5.61e-05
NDUFA10	-0.878618	4.50159	23.6351	1.16e-06	3.36e-05
AL441992.1	-0.878169	3.05011	15.722	7.34e-05	0.00110335
ZNF28	-0.877925	2.14742	7.84488	0.00509648	0.0327238
PRDM10	-0.877446	2.07379	8.22631	0.00412874	0.0279316
TBRG1	-0.875553	3.65195	20.8916	4.86e-06	0.00011128
NOL11	-0.874288	5.54175	31.3203	2.19e-08	9.69e-07
DHRS2	-0.874281	9.69986	36.1125	1.86e-09	1.07e-07
ZNF365	-0.874187	2.33747	9.88647	0.00166498	0.0138973
CCBE1	-0.874175	4.27086	19.265	1.14e-05	0.000227944
FRG1	-0.872526	4.66281	23.5359	1.23e-06	3.49e-05
DECR2	-0.871341	1.87864	7.86528	0.00503929	0.0325008
NUDCD2	-0.869835	5.09428	27.6578	1.45e-07	5.23e-06
ZXDC	-0.869148	3.14265	13.6735	0.000217497	0.0027014
HERC2	-0.8687	5.85156	28.0228	1.2e-07	4.43e-06
HSBP1	-0.868677	6.12388	34.7361	3.78e-09	2e-07
MSX2	-0.867433	2.4071	9.11016	0.00254194	0.0192737
APLP2	-0.866089	8.56793	32.8616	9.9e-09	4.78e-07
DGCR6L	-0.865649	3.18496	15.5943	7.85e-05	0.00116509
ZEB1	-0.864991	4.89292	20.6763	5.44e-06	0.000122844
MGME1	-0.863713	4.46808	25.2045	5.16e-07	1.65e-05
NA..70	-0.863127	2.22521	8.80497	0.00300411	0.0218436
GRID2	-0.862635	3.31017	11.6214	0.00065199	0.00657685
ELL2	-0.861927	3.72542	17.7491	2.52e-05	0.00044307
SIPA1L3	-0.86085	1.89532	8.13046	0.00435278	0.0290301
C16orf91	-0.860094	1.96999	7.9891	0.00470599	0.0307594
RTKN2	-0.859438	5.87186	34.7127	3.82e-09	2.02e-07
DYNC1I1	-0.858173	2.17282	7.62261	0.00576409	0.0357815
HIST1H2BD	-0.85793	4.67018	22.3594	2.26e-06	5.78e-05
KLK6	-0.857865	5.66542	27.4088	1.65e-07	5.85e-06
TTC30B	-0.855281	1.98777	7.82963	0.00513966	0.0329227
SAYSD1	-0.855111	2.98088	11.1738	0.000829597	0.00793066
ZNRF2	-0.854131	2.38211	7.862	0.00504847	0.0325283
GFM1	-0.853807	4.93021	21.4906	3.56e-06	8.5e-05
RBBP9	-0.851811	2.78289	10.2661	0.00135499	0.0118275
ERCC1	-0.851541	3.86099	16.8402	4.07e-05	0.000668822
RNF182	-0.850431	2.52245	11.4435	0.000717451	0.00711594
RSPO4	-0.849667	2.02299	8.45037	0.00364969	0.0253276
HYLS1	-0.849347	3.13834	13.7483	0.000209012	0.00261326
CDH12	-0.846963	2.29825	6.86494	0.0087903	0.0491591
AC037198.2	-0.846742	2.35774	8.11678	0.00438575	0.029181
ANXA2	-0.846092	9.37538	30.2694	3.76e-08	1.55e-06
IFT80	-0.845216	2.59498	8.49023	0.00357058	0.0248818
IQCA1	-0.842392	5.73814	21.7077	3.18e-06	7.73e-05
TMEM8A	-0.838956	5.74394	24.3973	7.84e-07	2.39e-05
ZXDB	-0.838171	3.44969	14.3038	0.000155549	0.0020539
NA..346	-0.835168	3.66833	13.6459	0.000220727	0.00273059
CENPBD1P1	-0.833905	2.89547	9.59651	0.00194947	0.0157749
SBF1	-0.833195	4.24163	19.2232	1.16e-05	0.00023181
SOCS3	-0.833086	3.04683	12.5404	0.000398248	0.00438277
BCL11B	-0.832967	4.98442	22.9683	1.65e-06	4.43e-05
GNE	-0.83289	3.37976	15.0163	0.000106588	0.00151353
HOXB2	-0.831132	3.80545	12.7382	0.000358259	0.00402201
PLAUR	-0.829542	5.49478	11.5524	0.000676617	0.00678238
FXYD6	-0.829	4.56967	12.8701	0.000333877	0.00382524
CCNG2	-0.827756	4.69291	19.7179	8.98e-06	0.000187299
JAM2	-0.827589	3.62319	12.1638	0.000487273	0.00519183
ITGA4	-0.825899	2.526	8.2871	0.00399277	0.0271827
VPS26B	-0.825539	2.93247	12.8151	0.000343832	0.0038978
AC245060.4	-0.824778	2.62294	10.6804	0.00108275	0.00984473
MARC1	-0.822533	2.67606	9.3846	0.00218815	0.0172159
DSTN	-0.822258	6.81383	24.2434	8.49e-07	2.54e-05
BTD	-0.822023	2.89988	10.0331	0.00153752	0.0131156
PIM1	-0.820697	3.53835	8.93264	0.0028012	0.0206978
SEC62	-0.820686	7.1751	24.4068	7.8e-07	2.38e-05
ASB1	-0.819336	3.56512	12.7193	0.000361893	0.00405375
PARVG	-0.817202	2.7612	9.70699	0.00183569	0.0150963
TRIP13	-0.817038	4.19324	20.2394	6.83e-06	0.000149413
TSTD1	-0.816625	4.13553	14.1942	0.000164874	0.00214878
ATRN	-0.816458	5.07328	14.1478	0.000168999	0.00219117
PSMC4	-0.816037	5.38494	22.9884	1.63e-06	4.39e-05
TRIM28	-0.814748	4.65601	23.5394	1.22e-06	3.49e-05
SEC24C	-0.812839	3.55079	15.4282	8.57e-05	0.00125965
KIF1BP	-0.811095	5.02709	22.7333	1.86e-06	4.88e-05
NFKBIZ	-0.810559	4.43932	15.4284	8.57e-05	0.00125965
CYTL1	-0.810318	4.20301	18.2233	1.96e-05	0.000359636
EIF4ENIF1	-0.809136	3.93931	14.5957	0.000133221	0.00180658
PRKCI	-0.808449	5.43552	19.4944	1.01e-05	0.000205421
GOLIM4	-0.808101	8.04212	28.2218	1.08e-07	4.02e-06
TIAM2	-0.807243	5.01987	23.4824	1.26e-06	3.56e-05
HIST1H1C	-0.806842	8.76731	33.4108	7.46e-09	3.75e-07
C20orf27	-0.805979	3.26972	13.5876	0.000227682	0.0028025
TRAPPC9	-0.805504	2.50962	8.07709	0.00448283	0.0296481
LINC01806	-0.80428	2.2716	7.6201	0.00577214	0.0358167
DDR2	-0.802495	5.84851	25.3541	4.77e-07	1.56e-05
TMEM184B	-0.802248	5.31661	21.7144	3.16e-06	7.71e-05
RBFA	-0.80179	2.47544	8.38318	0.00378709	0.026065
CYB5R3	-0.801692	6.00515	23.6152	1.18e-06	3.39e-05
MAPK9	-0.80061	3.983	16.4761	4.93e-05	0.000795548
SNX19	-0.799671	4.91976	18.0042	2.2e-05	0.000394868
TFRC	-0.799663	7.73203	22.9034	1.7e-06	4.53e-05
CTDP1	-0.799547	2.22533	7.03511	0.0079927	0.0458001
NA..129	-0.79858	2.26998	7.8019	0.00521914	0.0332199
BCL11A	-0.798414	4.92356	24.6216	6.98e-07	2.16e-05
LIG1	-0.796832	4.6568	20.0521	7.54e-06	0.000162432
TECR	-0.796022	3.63993	11.5642	0.000672328	0.00675286
NPM1	-0.795384	8.28372	25.3703	4.73e-07	1.55e-05
CDK5RAP3	-0.79517	3.70764	16.8874	3.97e-05	0.000657281
TMEM218	-0.79439	2.27217	7.27245	0.00700204	0.0413859
SRF	-0.793513	4.27506	18.4324	1.76e-05	0.000329058
JMJD8	-0.793414	4.8262	18.102	2.09e-05	0.000377781
ODF2	-0.792886	4.52332	19.3136	1.11e-05	0.000223444
ACTB	-0.79253	8.56678	21.3212	3.88e-06	9.2e-05
GRK6	-0.792085	3.97199	15.3645	8.86e-05	0.00129523
CADM4	-0.792009	5.04683	11.4091	0.000730858	0.00720151
RBX1	-0.791948	5.22672	23.5699	1.2e-06	3.45e-05
MTFMT	-0.79194	2.73996	10.0056	0.00156068	0.0132245
RASSF2	-0.79181	4.19726	18.9922	1.31e-05	0.000255491
MFSD1	-0.791082	4.88316	16.9989	3.74e-05	0.000626093
GLE1	-0.790607	5.00496	22.9668	1.65e-06	4.43e-05
CTSV	-0.790212	6.46848	18.2263	1.96e-05	0.000359512
RPS19BP1	-0.789994	3.96886	16.4706	4.94e-05	0.000796152
KIAA1549L	-0.789304	3.57444	13.9528	0.000187457	0.0023813
BOD1	-0.788066	4.45776	19.8619	8.32e-06	0.000176889
TCF4	-0.787943	6.80954	26.6441	2.45e-07	8.36e-06
CCDC127	-0.787535	4.05218	14.2507	0.000160001	0.00210347
TCF20	-0.78653	5.14366	24.4763	7.52e-07	2.31e-05
SLC25A1	-0.78648	4.52365	17.845	2.4e-05	0.00042477
CHTF18	-0.784275	2.38645	6.92901	0.00848088	0.0478192
LARP6	-0.782935	4.97309	21.5746	3.4e-06	8.19e-05
HNRNPAB	-0.782843	6.52773	23.3434	1.36e-06	3.79e-05
FASTKD5	-0.782596	4.21575	14.0226	0.000180627	0.00231405
CANX	-0.780006	9.54401	22.5504	2.05e-06	5.28e-05
RBM3	-0.779719	6.8666	31.2684	2.25e-08	9.9e-07
AC006504.5	-0.779116	4.78911	17.9431	2.28e-05	0.00040582
DCAF12L1	-0.778896	3.14074	12.8045	0.00034578	0.00391105
MUC15	-0.777566	3.66808	13.4328	0.00024726	0.00301394
ZFP14	-0.776904	2.46691	8.44427	0.00366196	0.0253894
KCNN4	-0.775773	4.30629	13.2264	0.000276031	0.00329009
CCT5	-0.773898	7.80566	25.9998	3.41e-07	1.14e-05
HPS4	-0.773516	6.75425	20.8138	5.06e-06	0.000115369
THG1L	-0.773467	3.52112	12.8184	0.000343219	0.00389599
EMP2	-0.772525	6.7671	24.6397	6.91e-07	2.15e-05
CLPTM1	-0.772346	5.45801	15.7216	7.34e-05	0.00110335
SC5D	-0.772314	6.27447	16.1015	6e-05	0.000931527
ADGRL2	-0.771794	5.598	22.9887	1.63e-06	4.39e-05
PPIB	-0.771412	7.11006	15.6344	7.68e-05	0.0011444
MRPL10	-0.770578	3.79395	17.2373	3.3e-05	0.000564148
GTSE1	-0.767821	5.89122	25.7398	3.91e-07	1.3e-05
UBE2F	-0.767002	3.97899	15.6928	7.45e-05	0.00111584
PDE10A	-0.766719	3.66817	16.2799	5.46e-05	0.000861082
PRKD1	-0.766237	3.00458	10.6127	0.00112311	0.0101382
RABAC1	-0.764398	5.1216	15.7395	7.27e-05	0.00109624
HMGCR	-0.762904	6.41156	19.8071	8.57e-06	0.000179999
CBY1	-0.761709	3.71026	12.9763	0.000315457	0.00367002
TBC1D12	-0.761621	3.90087	15.5774	7.92e-05	0.00117322
ERP29	-0.761513	7.77821	23.2956	1.39e-06	3.85e-05
SLC2A8	-0.761393	4.10888	14.5534	0.000136242	0.00183926
EXOSC3	-0.761031	3.98753	16.0795	6.07e-05	0.000939497
WWC2.AS2	-0.760222	2.37307	6.85638	0.00883254	0.049377
SYNGR1	-0.758822	3.27689	11.0352	0.000893996	0.00841809
TIPIN	-0.758595	3.82728	16.0205	6.27e-05	0.000962318
EXOC3.AS1	-0.758466	2.49363	8.61376	0.00333633	0.023643
UACA	-0.756628	7.03911	27.4674	1.6e-07	5.69e-06
MAPK8	-0.755915	4.48274	18.2585	1.93e-05	0.000354352
CRLS1	-0.755451	3.84716	13.6864	0.00021601	0.00268924
SSFA2	-0.75503	5.52549	22.0787	2.62e-06	6.53e-05
RGS17	-0.754818	2.65308	7.70594	0.00550394	0.0346231
IDI1	-0.754776	3.6169	13.7729	0.000206286	0.00258561
HNRNPF	-0.754641	7.1788	21.3368	3.85e-06	9.14e-05
PRPF31	-0.754123	3.33152	9.06476	0.00260583	0.0196101
AMPH	-0.753355	4.52417	18.1277	2.07e-05	0.000375425
SHQ1	-0.753212	3.09671	8.72035	0.00314678	0.0226298
RTL6	-0.753211	4.15822	17.7397	2.53e-05	0.000444226
SRP9	-0.753088	5.30894	19.9938	7.77e-06	0.00016627
MTRR	-0.752517	3.41386	13.212	0.00027816	0.00331285
BRD1	-0.752075	3.36165	12.8625	0.00033524	0.00383503
ISOC1	-0.752062	4.61914	14.7868	0.000120375	0.00167304
ZWINT	-0.751803	5.55565	24.034	9.46e-07	2.78e-05
PMP22	-0.750629	5.95241	14.2726	0.000158153	0.00208099
SNORA11F	-0.749907	2.39897	8.06625	0.00450973	0.0297867
IGFBP5	-0.749603	8.63809	12.5345	0.000399504	0.00439337
PRNP	-0.749594	6.73097	19.455	1.03e-05	0.000209128
METRN	-0.7495	2.76118	7.4565	0.00632076	0.0383214
SREBF2	-0.748901	6.02463	25.5481	4.31e-07	1.42e-05
LLGL1	-0.74567	3.72518	14.0208	0.000180804	0.00231435
GINS2	-0.74472	4.34561	18.3867	1.8e-05	0.000335373
CRNKL1	-0.744427	4.5902	18.5104	1.69e-05	0.000318426
AARD	-0.743453	3.0448	9.50967	0.00204391	0.0162602
PDCD10	-0.743024	5.2246	22.1813	2.48e-06	6.24e-05
AP1B1	-0.741271	4.88224	16.8239	4.1e-05	0.000673112
MSMO1	-0.741056	6.74623	17.6104	2.71e-05	0.000472182
NUDT2	-0.739495	3.15581	10.8464	0.00098988	0.00914379
CHSY1	-0.739153	5.19579	16.9993	3.74e-05	0.000626093
JAKMIP2	-0.73891	4.98646	18.0739	2.12e-05	0.000382957
INTS14	-0.737207	2.85637	8.68355	0.00321095	0.0229537
TAGLN	-0.73705	3.7836	11.2055	0.000815567	0.00784131
GLS	-0.736945	7.19543	22.7159	1.88e-06	4.9e-05
ARSA	-0.736932	2.73953	8.1495	0.00430731	0.0288802
LMCD1	-0.736157	4.32348	12.5877	0.000388296	0.0042952
ZC3H7B	-0.734254	4.61246	18.1577	2.03e-05	0.000370448
EMB	-0.731769	5.28635	15.0539	0.000104485	0.00148797
CDH18	-0.731754	2.69169	7.30438	0.00687866	0.0408812
STOX2	-0.731314	3.02325	10.0988	0.00148368	0.0127732
SHB	-0.730704	3.44547	10.9457	0.000938229	0.00873092
UHRF1	-0.730563	3.10746	8.7371	0.003118	0.0224792
SDHA	-0.729388	4.68745	15.8093	7.01e-05	0.00106293
CRELD2	-0.729326	5.99814	20.986	4.63e-06	0.000106905
LUC7L	-0.729264	5.04347	21.0595	4.45e-06	0.000103518
ZNF362	-0.728228	3.65918	12.9592	0.000318352	0.00368945
LIMD2	-0.727861	2.26662	6.99899	0.00815558	0.0464372
SLC7A5	-0.727669	6.1324	22.285	2.35e-06	5.97e-05
TSHZ3	-0.727518	4.07573	15.394	8.73e-05	0.0012814
IPMK	-0.726477	4.06965	13.3083	0.000264236	0.00317463
NR1H2	-0.726223	3.01832	7.04372	0.00795439	0.0456363
LIN9	-0.724992	3.3369	8.70296	0.00317694	0.0227381
SNHG18	-0.724582	2.53639	7.06272	0.00787043	0.0452925
PSMD12	-0.722741	6.42322	24.9235	5.97e-07	1.88e-05
HIGD2A	-0.722659	5.50731	22.9962	1.62e-06	4.39e-05
BPTF	-0.722427	8.22888	28.6612	8.62e-08	3.33e-06
DTYMK	-0.722166	4.55989	16.8681	4.01e-05	0.000661935
TSC22D1	-0.721769	5.47955	21.1295	4.29e-06	0.000100115
MXD3	-0.721538	3.29057	11.444	0.00071727	0.00711594
RPL6	-0.721104	6.61242	24.506	7.41e-07	2.28e-05
SERPINE1	-0.721049	7.47406	15.0839	0.000102839	0.00147124
COPS8	-0.720864	5.05147	19.4522	1.03e-05	0.000209158
DHRS4.AS1	-0.720575	2.73425	8.24688	0.00408222	0.027679
ACAT2	-0.720446	5.37953	13.9301	0.00018974	0.00240036
PHF5A	-0.719938	4.48683	13.9553	0.000187211	0.00238018
XBP1	-0.719083	5.44144	21.1898	4.16e-06	9.76e-05
XRCC6	-0.718709	6.83027	23.5133	1.24e-06	3.52e-05
TTLL12	-0.71835	2.831	7.41199	0.00647905	0.0390181
CERK	-0.717828	3.37738	9.33132	0.0022527	0.0176033
NA..130	-0.717785	6.62668	26.4913	2.65e-07	8.98e-06
ANXA7	-0.71696	5.22792	19.8254	8.48e-06	0.000179039
SNRPB2	-0.716526	6.62011	25.7024	3.98e-07	1.32e-05
FLJ22447	-0.716511	2.84742	9.10669	0.00254677	0.0193006
ICE1	-0.715511	6.12248	22.7915	1.81e-06	4.76e-05
PWWP2A	-0.715066	5.11877	19.2659	1.14e-05	0.000227944
MRC2	-0.714222	6.42935	15.6749	7.52e-05	0.00112308
MANEAL	-0.714074	2.98959	9.42085	0.00214532	0.0169311
MMP16	-0.713903	6.15291	19.1044	1.24e-05	0.000243098
RUFY1	-0.712997	4.50112	12.1951	0.000479154	0.00512345
KIAA0556	-0.712686	2.64552	7.41181	0.00647971	0.0390181
THEM6	-0.712666	3.37574	11.323	0.00076554	0.00745066
CDK17	-0.712362	3.39912	10.9968	0.000912684	0.00857263
YAF2	-0.712261	4.30738	16.321	5.35e-05	0.000846176
SET	-0.708016	8.26211	21.6543	3.26e-06	7.9e-05
PPP4R2	-0.707468	6.02422	19.2822	1.13e-05	0.000226505
HDLBP	-0.707013	6.8486	19.7185	8.97e-06	0.000187299
PNPLA3	-0.706592	3.44123	9.82107	0.00172524	0.0143052
LMAN2	-0.706498	6.66607	20.1097	7.31e-06	0.000158293
ZNF226	-0.705936	3.72664	11.4212	0.00072612	0.00716531
CTDSPL2	-0.705601	5.74133	22.8234	1.78e-06	4.7e-05
KHDRBS3	-0.705405	5.59524	20.9479	4.72e-06	0.00010857
C5orf15	-0.704656	6.60723	9.26903	0.00233061	0.0180809
PAPD7	-0.70362	3.79309	13.5232	0.000235626	0.00287911
TTYH1	-0.702365	5.09444	15.3152	9.1e-05	0.00132438
SUCLG2	-0.702187	4.21271	15.6337	7.69e-05	0.0011444
CECR2	-0.701715	4.14258	16.097	6.02e-05	0.000932799
CDC42EP4	-0.701414	4.20902	10.314	0.00132027	0.0115782
MYEOV	-0.70128	4.60762	16.8836	3.97e-05	0.000657281
PTPRK	-0.700806	5.46512	15.1599	9.88e-05	0.00142409
CDK1	-0.700443	7.03941	22.6203	1.97e-06	5.12e-05
CNEP1R1	-0.699608	3.36713	8.96454	0.00275269	0.0203975
ZNF580	-0.699378	3.03144	9.37327	0.00220173	0.0172943
EMP1	-0.699339	7.28412	19.5433	9.83e-06	0.000201312
SGPL1	-0.699158	6.97728	24.3497	8.03e-07	2.43e-05
PRR14L	-0.698974	5.35491	18.375	1.81e-05	0.000337033
EVA1A	-0.69845	4.34251	13.9299	0.000189754	0.00240036
DPY19L3	-0.698354	4.08045	8.40427	0.0037434	0.0258588
IVNS1ABP	-0.698254	5.77138	23.1799	1.48e-06	4.03e-05
AGAP1	-0.697759	5.15906	18.6814	1.54e-05	0.00029424
CAMK2N1	-0.697389	5.58741	20.1932	7e-06	0.000152401
NCAPD3	-0.697073	3.76951	11.8519	0.000576037	0.00595238
KIAA1191	-0.696353	4.25451	14.742	0.00012327	0.00170517
URM1	-0.696193	3.7898	10.89	0.000966843	0.00893647
NA..149	-0.695682	4.5001	12.4073	0.00042765	0.00464862
S100A4	-0.694203	2.7083	7.1538	0.00748053	0.0434638
PTPRA	-0.693746	5.39944	18.8239	1.43e-05	0.000276904
ST13	-0.693396	6.5821	14.0115	0.000181696	0.00232182
ZNF181	-0.693137	2.58162	7.0277	0.00802582	0.0458888
RSRC1	-0.692154	5.49092	16.0445	6.19e-05	0.000953126
EP300	-0.691989	6.63615	24.8479	6.2e-07	1.94e-05
TSEN34	-0.691552	4.98794	19.1184	1.23e-05	0.00024223
CLINT1	-0.691537	6.3365	20.2063	6.95e-06	0.000151586
CNOT6	-0.691444	4.52403	16.1296	5.92e-05	0.000919722
FERMT2	-0.691146	5.89347	19.5326	9.89e-06	0.000201897
HNRNPA1P48	-0.691006	2.48968	7.04812	0.00793485	0.0455588
AC243964.3	-0.688248	3.34327	8.11452	0.0043912	0.0291842
NUBP1	-0.687952	4.3364	14.7328	0.000123875	0.00170717
UBE2I	-0.687211	6.93586	22.8789	1.73e-06	4.58e-05
DAP	-0.685853	4.81978	14.0406	0.000178902	0.00229918
PPP1R7	-0.685255	4.59948	13.1584	0.000286228	0.00339286
ASTN1	-0.684584	3.41825	7.83548	0.00512304	0.0328581
SEMA3C	-0.684345	6.79756	16.316	5.36e-05	0.000846629
UQCRFS1	-0.683734	4.89611	16.2223	5.63e-05	0.000883061
GATA4	-0.683506	2.6856	7.63593	0.0057217	0.0356211
SEPT02	-0.681876	6.06363	22.9636	1.65e-06	4.43e-05
TUBGCP5	-0.681056	4.43514	13.7506	0.000208757	0.00261224
CGGBP1	-0.680932	5.51995	20.6973	5.38e-06	0.000121685
SNU13	-0.680834	5.54855	15.0761	0.000103261	0.00147323
SPAG7	-0.680765	4.60554	13.5551	0.000231655	0.00283749
WIPI1	-0.6807	3.93709	11.6616	0.000638045	0.00647005
NA..37	-0.680571	7.55456	16.8869	3.97e-05	0.000657281
RNF170	-0.680019	3.30891	8.63523	0.00329723	0.0234365
CCDC34	-0.67998	6.44936	14.2808	0.000157467	0.00207377
NFRKB	-0.679286	3.26293	9.07663	0.00258897	0.019532
SQLE	-0.67925	8.90495	20.2508	6.79e-06	0.000148961
IRF2BPL	-0.678555	6.07644	21.435	3.66e-06	8.74e-05
NTM	-0.677222	7.45378	20.3669	6.39e-06	0.000141217
CCDC97	-0.676838	2.55307	7.18218	0.00736312	0.0429472
SLC39A4	-0.676694	3.24087	9.16974	0.00246049	0.018863
RTCB	-0.675181	4.63963	13.6904	0.00021555	0.00268609
SLC35A1	-0.675086	3.58416	8.64077	0.00328723	0.0234052
CLN5	-0.674934	3.40752	7.70406	0.00550968	0.0346303
C3orf38	-0.67304	3.87426	13.0266	0.000307095	0.00359215
RMND5B	-0.67283	2.95833	7.29915	0.00689873	0.0409198
FAM129B	-0.67266	3.99734	12.2873	0.000456049	0.00491476
CTGF	-0.671963	8.62404	9.63831	0.00190561	0.0155105
ACO1	-0.671831	4.85129	15.6866	7.48e-05	0.00111836
NSUN2	-0.67183	4.52914	12.9851	0.000313977	0.00365845
CHMP1A	-0.671731	2.87866	7.30163	0.00688919	0.0408954
CSTF2T	-0.671224	4.27999	13.9423	0.00018851	0.00238979
RTN4R	-0.671087	6.42067	20.3929	6.31e-06	0.000139725
NA..131	-0.66962	7.79305	22.0598	2.64e-06	6.57e-05
NHP2	-0.669587	4.8966	13.5571	0.000231409	0.00283678
C12orf57	-0.66913	4.81166	17.0509	3.64e-05	0.000613283
LIX1L	-0.669057	2.99128	7.92846	0.00486633	0.0315745
STK25	-0.668733	4.70936	14.9275	0.000111723	0.0015731
PTPRE	-0.668327	3.03165	7.95779	0.00478809	0.0312146
FLRT3	-0.667643	3.70337	9.71665	0.00182606	0.0150418
TMED7	-0.667543	6.25968	13.6542	0.000219745	0.00272401
POLD1	-0.667538	2.78714	6.97396	0.00827043	0.0469135
AAGAB	-0.666987	5.07521	18.1501	2.04e-05	0.000371483
HECTD4	-0.665688	3.38332	8.79237	0.00302494	0.0219421
DRG1	-0.6649	4.55271	11.0722	0.000876313	0.00831394
MYRF	-0.664249	2.95509	7.08332	0.00778048	0.0448606
STK10	-0.664185	3.17932	7.11651	0.00763772	0.0442236
PSMF1	-0.663381	5.01092	12.8314	0.00034085	0.00388739
RCC2	-0.66332	5.90685	10.1671	0.00142971	0.0123865
MMP2	-0.662244	5.75634	11.4238	0.000725105	0.00716356
NA..331	-0.661957	5.01116	17.9682	2.25e-05	0.00040133
RER1	-0.661586	5.16458	10.3295	0.00130919	0.0115077
TM9SF2	-0.661455	7.08021	8.72619	0.00313671	0.0225789
SAE1	-0.661092	5.69932	16.7842	4.19e-05	0.00068509
ZCRB1	-0.660133	6.44583	17.9323	2.29e-05	0.00040765
UGDH	-0.659879	5.04222	12.9218	0.000324785	0.00374672
ETV6	-0.659653	5.29549	15.5488	8.04e-05	0.00118875
ADSL	-0.658902	5.77645	14.5777	0.000134498	0.00181898
HOXA13	-0.658666	3.32467	7.26517	0.00703044	0.041505
TRAF7	-0.658588	5.374	14.6839	0.000127128	0.00174437
CCT8	-0.655388	8.0284	19.1137	1.23e-05	0.00024223
SPDL1	-0.655232	5.8043	18.6393	1.58e-05	0.000300381
C19orf47	-0.654442	2.62663	6.90659	0.00858785	0.0483139
SLU7	-0.65375	5.50834	12.3648	0.000437494	0.00473369
NCAPH2	-0.652897	3.92497	9.31635	0.00227118	0.0176954
MORF4L1	-0.652112	7.29947	19.0788	1.25e-05	0.000245425
FKBP1A	-0.651765	5.35816	13.1615	0.000285754	0.00339257
FEM1B	-0.651649	5.55264	18.6895	1.54e-05	0.000293364
ACO2	-0.651541	4.9783	15.6825	7.49e-05	0.00111971
PMM1	-0.651358	3.44497	8.34185	0.00387421	0.0265555
DNM1	-0.650665	3.87036	12.211	0.000475075	0.00508705
RAB1A	-0.650586	6.82062	20.748	5.24e-06	0.000118865
NOVA2	-0.650494	4.91927	13.2629	0.000270704	0.00323428
GALNT2	-0.647941	7.26423	11.3746	0.000744542	0.00731243
GCNT1	-0.646335	3.79652	10.141	0.00145007	0.0125484
ARNTL2	-0.646238	3.89788	10.2113	0.00139585	0.012135
MED12L	-0.645584	3.52958	9.52061	0.00203178	0.016179
ATXN10	-0.645512	5.29376	12.8219	0.000342586	0.00389599
RABL2B	-0.64536	4.06657	8.58985	0.00338042	0.0238769
MVD	-0.645344	3.25917	8.52459	0.00350379	0.0245298
PMEPA1	-0.644506	9.34061	21.1458	4.26e-06	9.94e-05
NCOA5	-0.644258	2.92342	7.20269	0.00727945	0.0426077
GOLGA2	-0.644161	6.11495	18.1218	2.07e-05	0.000376131
ETV5	-0.644129	4.17803	11.5714	0.000669741	0.00673137
YY1AP1	-0.643469	4.43298	14.6892	0.00012677	0.00174104
VCP	-0.643454	7.87127	20.6606	5.48e-06	0.000123483
TXNL4A	-0.643063	4.73901	12.6828	0.00036904	0.00412083
TRMT6	-0.64298	4.74637	12.8276	0.000341549	0.00389242
HOXA11	-0.639971	3.90544	7.68901	0.0055558	0.034804
NA..31	-0.639957	7.48703	17.407	3.02e-05	0.000520688
ATP6V1E1	-0.638934	4.95762	10.9491	0.000936488	0.0087255
SLC41A3	-0.638911	4.58709	9.66301	0.00188016	0.0153614
KAT6B	-0.638793	5.75451	18.4043	1.79e-05	0.000333124
PELI1	-0.638456	3.56044	9.12876	0.00251622	0.0191268
MIR4458HG	-0.638412	3.05277	7.93294	0.00485429	0.0315147
INTS10	-0.63719	3.79767	9.14489	0.00249414	0.0190166
CCNG1	-0.636739	5.44403	17.8006	2.45e-05	0.000434284
HACD3	-0.636518	8.01538	15.8552	6.84e-05	0.00103883
EDEM3	-0.636221	5.32275	8.904	0.00284547	0.0209223
HCFC1R1	-0.636163	5.60142	13.6099	0.000224995	0.00277395
RTN3	-0.636092	6.90512	14.8364	0.000117253	0.00163872
ASB7	-0.635343	3.22047	8.33084	0.00389777	0.0266805
NA..386	-0.634251	4.61677	9.59638	0.00194962	0.0157749
CALM3	-0.633561	6.66056	18.2825	1.9e-05	0.000351074
COL5A1	-0.633081	6.0779	14.2374	0.000161133	0.00211282
CHRAC1	-0.632175	5.25204	16.2111	5.67e-05	0.000886432
ERRFI1	-0.631895	3.41235	8.54305	0.00346844	0.0243729
FAT1	-0.631206	6.70025	12.5477	0.000396704	0.0043694
DCAF12	-0.631043	4.4738	11.8426	0.000578911	0.0059738
H3F3B	-0.630188	8.64237	20.1535	7.15e-06	0.000155151
ITGAV	-0.630022	6.93125	11.669	0.000635489	0.00646037
USP40	-0.629079	4.45006	11.4333	0.000721411	0.00714581
COL16A1	-0.628373	4.56124	7.24728	0.00710086	0.0418223
SPSB1	-0.628192	3.16835	7.04643	0.00794233	0.0455844
DPM1	-0.627886	4.94881	10.8106	0.00100923	0.00928839
STXBP3	-0.627043	4.02975	11.1796	0.000827024	0.00792114
LDLRAD3	-0.626984	4.53179	12.9882	0.000313466	0.00365532
FANCG	-0.626826	4.68498	13.263	0.000270693	0.00323428
ALDH1B1	-0.626663	4.37427	9.8244	0.00172212	0.0142872
NEDD9	-0.626589	5.29765	13.6389	0.000221547	0.00273789
KDELR3	-0.626405	5.26343	10.5329	0.00117268	0.0105165
NCOR1	-0.626172	6.30952	18.9172	1.37e-05	0.000264368
MYO10	-0.62369	5.9266	18.7518	1.49e-05	0.000285376
FBXW11	-0.623503	4.28136	11.6289	0.000649357	0.00656152
RNF38	-0.62268	3.66018	9.65052	0.00189298	0.0154243
ACAP2	-0.622598	5.22601	13.7263	0.000211478	0.0026397
SMIM10L1	-0.620835	5.90241	16.9262	3.89e-05	0.000646237
PHLDB2	-0.618114	7.81396	17.441	2.96e-05	0.000512642
CALM2	-0.617347	8.70249	19.8885	8.21e-06	0.000174926
METTL26	-0.616948	3.06578	7.53015	0.0060675	0.0371295
ZNF860	-0.616651	3.33881	7.20045	0.00728854	0.0426278
PTPN11	-0.61604	6.55964	14.7979	0.000119667	0.00166628
RAB11A	-0.61471	6.13248	18.542	1.66e-05	0.000314181
ANKRD27	-0.614389	3.96627	11.2267	0.000806304	0.00777209
MELK	-0.613536	5.36937	13.3706	0.000255601	0.00309806
PES1	-0.613395	3.36964	7.85699	0.00506245	0.0325665
PPP3CA	-0.612505	8.01231	19.8192	8.51e-06	0.000179369
PRELID1	-0.612255	5.61894	15.8788	6.75e-05	0.00102976
CCND1	-0.611761	6.9056	13.3533	0.00025797	0.00311674
PPP1R2	-0.611161	4.36819	11.5952	0.000661206	0.00665446
SNRNP25	-0.610736	3.69929	9.60186	0.0019438	0.0157697
POLDIP3	-0.610449	3.66693	7.40762	0.00649483	0.0390623
UQCR10	-0.610446	5.01386	14.1861	0.000165591	0.00215626
RBP1	-0.610177	5.47032	14.7408	0.000123351	0.00170517
EPHB2	-0.609549	6.04567	12.9104	0.000326755	0.00376368
MTMR3	-0.609353	4.21877	10.0166	0.00155139	0.0131829
DSE	-0.609143	5.90397	16.7282	4.31e-05	0.000704103
FADS1	-0.608637	8.30778	14.1071	0.000172688	0.00223132
PPP1R13L	-0.6076	4.01129	10.3496	0.00129504	0.011435
C1GALT1C1	-0.606199	4.36538	7.42343	0.00643801	0.0388291
TMSB15A	-0.605834	4.24835	10.3861	0.00126968	0.0112856
STK35	-0.603945	4.09631	8.01771	0.00463222	0.0304224
ZNF420	-0.603904	3.13949	7.13796	0.00754692	0.0437872
P4HA1	-0.601346	7.29618	11.9565	0.000544567	0.00567475
CDK8	-0.60134	3.33161	7.53994	0.00603461	0.0369686
FBXO7	-0.600077	5.61352	16.3466	5.28e-05	0.000838331
SEPT06	-0.599461	4.86139	11.727	0.000615994	0.00630045
PCSK1N	-0.598628	3.9274	7.86095	0.00505138	0.0325283
VDAC2	-0.597205	6.203	16.8509	4.04e-05	0.000665772
SH3PXD2B	-0.596339	4.73424	10.6954	0.00107401	0.00978294
TFAM	-0.596091	7.14379	13.9414	0.000188601	0.00238979
B4GALT1	-0.595935	6.84919	16.5461	4.75e-05	0.000769185
PLEKHA5	-0.594836	6.50101	18.109	2.09e-05	0.000377303
LPP	-0.594614	6.14844	14.0984	0.000173493	0.0022398
C17orf80	-0.594356	4.72375	11.865	0.000571983	0.00591861
EPHB3	-0.594041	3.86637	7.56482	0.00595186	0.0365939
MRPL33	-0.593964	6.97577	12.13	0.000496177	0.00526436
SIRPA	-0.593879	5.64901	14.3246	0.000153843	0.00203673
ADAM10	-0.593643	7.17231	11.4209	0.000726233	0.00716531
CADM3	-0.59293	4.43384	7.86399	0.0050429	0.0325102
SH3BP4	-0.592653	5.9523	14.3818	0.000149238	0.00198799
ANOS1	-0.592432	4.43639	9.93462	0.00162199	0.0136214
KIAA0355	-0.59218	4.22643	7.19642	0.0073049	0.0427069
ANP32A	-0.592058	6.39288	15.5849	7.89e-05	0.00116974
REEP5	-0.590552	6.8679	12.7121	0.000363298	0.00406645
DBN1	-0.590189	6.86001	15.359	8.89e-05	0.00129778
URI1	-0.589729	6.88791	16.3364	5.3e-05	0.000841103
POP4	-0.589529	4.25803	9.06581	0.00260433	0.0196086
SOX9	-0.589469	7.36792	14.6533	0.000129207	0.00176967
IMPA1	-0.588138	3.7308	8.87232	0.00289527	0.0211851
TBCB	-0.588055	5.43342	14.6485	0.000129537	0.00177257
TMX4	-0.588022	5.83051	16.3743	5.2e-05	0.000830556
CLTC	-0.587838	8.98655	18.3276	1.86e-05	0.000343395
AC079062.1	-0.587456	3.59565	8.33345	0.00389217	0.0266543
ZDHHC12	-0.587406	4.84084	9.91448	0.00163983	0.0137026
ZCCHC3	-0.587378	3.81347	8.93042	0.0028046	0.0207128
CEBPG	-0.587328	4.37972	11.8306	0.000582646	0.0060042
NCBP2.AS2	-0.587089	4.57542	10.0559	0.00151858	0.0130141
CNN3	-0.587034	6.56618	11.9883	0.000535362	0.00560123
NUDT10	-0.586971	3.60062	8.25362	0.00406707	0.0276136
FPGS	-0.585523	3.35811	7.57132	0.00593042	0.0365132
GTF2H3	-0.585421	3.83029	7.80535	0.00520917	0.0331745
ZBTB44	-0.585405	4.92449	12.752	0.000355625	0.00400138
SF3B4	-0.585281	4.55394	11.1746	0.00082927	0.00793066
HSPA1A	-0.58517	6.78977	16.9599	3.82e-05	0.000637666
ATP6V1B2	-0.584757	4.82694	12.5265	0.000401211	0.00440893
GLIPR1	-0.584709	4.34198	9.15164	0.00248496	0.0189753
C15orf61	-0.584554	3.88066	8.8891	0.00286878	0.0210576
AMIGO2	-0.583435	7.97632	12.9686	0.000316763	0.00367859
LRP6	-0.582885	7.23174	13.4061	0.000250811	0.00305228
PRAG1	-0.582518	4.85321	12.15	0.000490886	0.00521926
TNFRSF12A	-0.582024	5.76383	14.6014	0.000132813	0.00180429
COPS7A	-0.58199	4.12003	11.1083	0.00085941	0.00818449
SMC4	-0.581139	9.05545	17.6415	2.67e-05	0.00046561
HMGB1	-0.581135	7.59106	17.1577	3.44e-05	0.000584962
CPEB4	-0.580848	4.02365	9.03487	0.00264878	0.0198239
MKKS	-0.580715	4.57381	10.7756	0.00102847	0.00944235
PDHB	-0.580407	4.74667	12.0742	0.000511238	0.00539
TOB2	-0.580333	5.38152	11.5337	0.000683443	0.00683715
SFXN1	-0.580092	6.12729	16.4373	5.03e-05	0.000807673
ALG2	-0.57958	4.74988	10.9867	0.000917673	0.00858736
KIAA0930	-0.578968	4.78212	10.9027	0.000960241	0.00888636
RPL13	-0.578458	7.78818	17.0544	3.63e-05	0.000612818
BCL2L11	-0.577736	4.06335	8.3993	0.00375365	0.0259177
RCN1	-0.577536	6.52889	9.36495	0.00221174	0.0173462
MDH1	-0.576946	6.71118	16.2008	5.7e-05	0.000890344
OPA1	-0.57627	5.71608	14.0321	0.000179718	0.00230633
COL5A2	-0.575591	5.06772	8.39476	0.00376304	0.0259587
LRRFIP1	-0.575489	6.36352	13.5186	0.000236207	0.00288387
PCLAF	-0.575417	7.07362	15.8814	6.74e-05	0.00102942
TXN2	-0.57446	4.52966	7.9207	0.00488725	0.0316966
MARK4	-0.574103	3.66121	7.05291	0.00791365	0.0454718
OST4	-0.573818	7.2071	11.2335	0.000803325	0.0077533
UBA3	-0.573815	3.71384	8.71323	0.00315909	0.0226813
CENPM	-0.573461	4.44929	9.55805	0.00199074	0.0160149
FNDC3B	-0.572944	6.0935	14.9724	0.000109097	0.00154624
SFRP1	-0.57246	6.72236	14.5823	0.00013417	0.00181618
HMMR	-0.57228	6.50272	14.9129	0.000112589	0.00158381
CDS2	-0.57116	5.01081	10.7462	0.00104496	0.00955879
TBC1D22A	-0.57093	3.80486	8.66232	0.00324858	0.0231519
FRMD5	-0.570253	4.27101	8.07792	0.00448077	0.0296481
CDC42EP3	-0.569987	5.62658	15.0909	0.000102457	0.00146732
SSTR2	-0.569478	3.95576	6.88782	0.00867849	0.0487328
PSENEN	-0.56927	4.73042	9.72279	0.00181997	0.0150163
PSD3	-0.569118	5.2544	10.9812	0.000920418	0.00860771
PTPRG	-0.568939	5.95492	10.9729	0.00092454	0.00863019
CD40	-0.568784	4.40238	7.90286	0.00493568	0.0319695
GIGYF2	-0.568121	6.70006	14.4563	0.000143448	0.00192619
TRIB2	-0.568049	6.13065	14.1298	0.000170618	0.00221026
BTBD3	-0.56775	3.34008	7.62452	0.00575802	0.0357712
TPM2	-0.566973	6.28298	12.7463	0.000356719	0.0040107
UBE2D1	-0.564674	4.42279	9.67154	0.00187145	0.0153152
SPCS2	-0.564382	3.63501	6.99887	0.00815614	0.0464372
SELENOM	-0.564275	3.87731	8.53685	0.00348028	0.0244219
LRRC8A	-0.563038	6.0107	12.1276	0.000496808	0.00526735
TMEM50A	-0.562562	6.4382	11.393	0.000737228	0.00725005
NA..154	-0.562138	4.05291	8.17911	0.00423756	0.028574
TGFBI	-0.561704	5.43756	12.9064	0.000327457	0.003766
ZWILCH	-0.561063	5.91902	14.3097	0.000155063	0.00204927
FBN2	-0.560871	5.57178	8.51545	0.00352145	0.0245963
CAPNS1	-0.560665	6.09761	11.413	0.00072933	0.00719116
SGCB	-0.559356	5.7557	10.6459	0.00110312	0.00999981
NPTN	-0.559146	6.87664	10.9369	0.000942654	0.0087529
MARCH6	-0.559143	6.97106	12.9242	0.000324364	0.00374473
MIS18A	-0.558435	5.40248	12.9699	0.000316543	0.00367859
NUP50	-0.557935	5.47519	10.7442	0.00104606	0.00956303
NT5DC1	-0.557911	4.28095	10.0669	0.00150956	0.0129516
CREBRF	-0.557741	4.66005	8.97004	0.00274442	0.0203634
TPST2	-0.557051	5.06403	10.6222	0.00111738	0.0101004
ERG28	-0.55705	4.67894	8.53469	0.00348441	0.0244396
TMX1	-0.556804	7.20296	10.0311	0.00153923	0.0131166
VPS8	-0.556393	4.5136	9.92328	0.00163201	0.0136675
UBBP4	-0.556335	4.35709	8.92759	0.00280895	0.0207145
ZNF654	-0.555992	3.9029	7.62881	0.00574432	0.0357299
AAMP	-0.555898	4.88193	11.4491	0.000715267	0.00710832
GNB4	-0.555647	4.21191	8.96382	0.00275379	0.0203975
USP16	-0.555476	6.54325	14.9398	0.000110997	0.00156728
DBP	-0.555444	3.53706	7.67875	0.0055875	0.0349566
PFN1	-0.555329	6.63598	8.75886	0.00308102	0.0223167
MCM8	-0.554988	5.34931	11.7588	0.000605559	0.00621482
FN1	-0.554681	7.59035	10.1189	0.0014676	0.0126675
JAZF1	-0.554535	3.49507	6.98518	0.00821875	0.0466907
EXOC3	-0.554331	3.97591	8.26343	0.00404516	0.0275144
NCAM1	-0.553971	7.26402	11.6873	0.000629289	0.00641466
SPG21	-0.553955	4.92532	9.06915	0.00259958	0.0195924
THOC5	-0.553698	4.29802	9.54602	0.00200383	0.0160328
PPP3CB	-0.553478	4.95058	11.6612	0.000638159	0.00647005
MYORG	-0.553076	5.36349	9.71728	0.00182544	0.0150418
ARHGAP28	-0.552964	5.24228	9.97598	0.00158596	0.0133935
CCT4	-0.552669	7.24678	15.8691	6.79e-05	0.00103296
TNKS	-0.550189	4.53448	8.59172	0.00337696	0.0238636
MGAT4B	-0.548281	6.8042	12.9649	0.00031739	0.00368114
ARL4C	-0.548009	7.22488	14.8417	0.000116923	0.00163562
LSM14A	-0.547065	5.57276	12.616	0.000382466	0.0042463
KLF10	-0.546872	4.67878	9.85892	0.0016901	0.0140758
CSRP2	-0.546748	4.16831	8.973	0.00273998	0.0203566
ECT2	-0.546701	5.88669	12.9958	0.000312197	0.00364617
SNRPD2	-0.545319	7.0065	15.1093	0.000101462	0.00145445
KIF16B	-0.544968	4.22575	8.13896	0.0043324	0.0289711
AHCY	-0.543486	5.98363	13.1253	0.000291341	0.00344262
ZNF22	-0.543258	5.48602	12.8185	0.00034321	0.00389599
CDK2AP2	-0.542729	4.66587	8.50139	0.00354876	0.0247756
NA..290	-0.542599	3.57421	7.71545	0.00547501	0.0345274
XRCC1	-0.542401	3.83725	7.1491	0.00750015	0.043561
ISCU	-0.541368	4.47941	7.33672	0.00675602	0.0403113
RRAS	-0.541266	5.18032	10.0227	0.00154619	0.0131462
COPS9	-0.540807	4.6783	9.22527	0.00238698	0.0184611
ACOT7	-0.539371	3.61892	7.16265	0.00744372	0.0432666
DMAC2	-0.538737	4.0791	8.86492	0.00290703	0.0212402
NCEH1	-0.53854	4.76271	7.08499	0.00777322	0.0448531
ACTN4	-0.538422	7.28205	12.9171	0.000325585	0.00375308
M6PR	-0.53801	6.96392	8.97289	0.00274015	0.0203566
MFHAS1	-0.537995	5.67609	11.3804	0.000742245	0.00729462
ATP5C1	-0.537634	4.40348	8.62809	0.00331019	0.023502
NUDT11	-0.537345	4.32299	9.57227	0.00197539	0.0159198
ZNF280B	-0.535272	5.27514	11.4246	0.000724796	0.00716356
ECH1	-0.535071	4.27049	7.24501	0.00710983	0.0418465
PRR34.AS1	-0.53373	3.61123	7.1759	0.00738893	0.0430145
ALKBH5	-0.533019	4.91644	9.35391	0.00222511	0.017442
RNF44	-0.532599	4.06257	7.53944	0.00603629	0.0369686
DHCR24	-0.532482	7.41982	11.3466	0.000755847	0.00740415
FAM102A	-0.532239	4.03165	7.41711	0.00646066	0.0389345
RECK	-0.531177	4.15636	7.58247	0.00589385	0.0363772
CDC45	-0.530979	4.50025	10.136	0.00145401	0.0125681
PRMT1	-0.53067	5.27093	9.50948	0.00204413	0.0162602
AMOT	-0.530612	4.66431	9.98369	0.00157933	0.01336
PFN2	-0.529884	6.3422	14.4773	0.000141856	0.00190993
NDUFS2	-0.529467	5.68952	10.3031	0.0013281	0.0116332
FURIN	-0.529351	5.35394	10.0277	0.001542	0.013127
HOXC13	-0.528756	4.12371	8.05375	0.00454096	0.0299482
EFR3A	-0.528099	7.92492	14.7546	0.000122451	0.00169719
MYADM	-0.527858	6.09872	9.59765	0.00194827	0.0157749
EIF3J	-0.52686	6.52185	9.92337	0.00163194	0.0136675
ANKH	-0.526706	3.77993	6.88905	0.00867255	0.0487176
MCRIP1	-0.526539	4.60655	8.13402	0.00434424	0.0290245
CBX6	-0.525902	6.45524	11.0049	0.000908705	0.00854591
IKBIP	-0.525428	6.62433	10.1007	0.0014821	0.0127732
GAS2L1	-0.525104	4.81145	8.70895	0.00316652	0.0226959
ZNF264	-0.524873	4.0349	8.32335	0.00391387	0.0267664
HINT2	-0.524663	4.49782	8.21188	0.0041617	0.0281167
FEN1	-0.524236	6.29046	11.9813	0.000537381	0.00561455
NA..177	-0.524166	5.3192	8.80278	0.00300772	0.0218441
SF3A1	-0.524007	5.96511	12.137	0.00049431	0.00524826
HNRNPH3	-0.523953	7.25249	11.0793	0.000872966	0.00828987
GPHN	-0.523558	3.74836	6.96699	0.00830272	0.0470436
EIF4A2	-0.523445	6.60429	11.8736	0.00056935	0.00589542
CCDC152	-0.522969	5.49046	9.60305	0.00194254	0.0157697
SMTN	-0.522747	4.39083	8.63203	0.00330303	0.0234623
NIPA1	-0.522249	5.29005	9.17703	0.00245072	0.0188368
SUN2	-0.522209	5.30549	8.91028	0.00283569	0.0208731
UBA2	-0.521092	5.70566	12.176	0.000484074	0.00516871
NF2	-0.520935	6.30299	10.0839	0.00149573	0.0128535
BEX1	-0.520779	5.55818	9.52215	0.00203006	0.0161739
TBL1XR1	-0.520599	6.08858	13.6533	0.000219859	0.00272401
TMEM87A	-0.520387	6.88639	7.50489	0.00615316	0.0375318
FOSL2	-0.519686	6.32317	13.5674	0.000230143	0.00282586
ACTG1	-0.519526	9.6763	13.0628	0.000301211	0.00353981
TMEM65	-0.519402	5.07337	9.18019	0.00244648	0.018815
RNF145	-0.519374	5.99527	11.1744	0.000829347	0.00793066
PPP2R1A	-0.519347	4.29471	7.07151	0.00783193	0.0450882
CASK	-0.519238	4.82014	9.45855	0.00210168	0.0166389
IDH1	-0.518067	5.44046	9.49981	0.00205493	0.0163203
VASP	-0.517806	4.60599	8.53312	0.00348742	0.0244493
FAM200B	-0.517115	4.73852	9.92051	0.00163447	0.0136729
RPL12	-0.517041	7.09678	11.6358	0.000646939	0.00654146
N4BP2	-0.516416	6.57735	12.2344	0.000469157	0.00502725
SMARCA1	-0.51612	6.99185	13.1779	0.000283272	0.00336576
MANF	-0.515313	6.39861	7.80639	0.00520617	0.0331745
NA..20	-0.51473	4.36123	7.33487	0.00676297	0.04032
NFE2L1	-0.514273	7.33687	9.53877	0.00201176	0.0160706
NDUFB5	-0.514089	5.42133	11.7592	0.000605439	0.00621482
ZMIZ1	-0.514028	4.789	10.0067	0.00155975	0.0132241
PPP1CC	-0.512518	6.05942	11.8898	0.000564434	0.00585255
HJURP	-0.510548	5.4494	11.6453	0.000643633	0.00651679
MAF1	-0.51021	5.37242	8.85277	0.00292644	0.021351
SNRPD3	-0.508974	6.02035	11.3431	0.000757275	0.00741333
ECD	-0.508648	5.34372	9.92136	0.00163371	0.0136729
TOMM40	-0.508013	5.23946	10.3336	0.00130632	0.0114892
RAB11FIP4	-0.507543	4.06845	6.98325	0.00822762	0.0467234
FADS2	-0.507538	7.92208	8.25125	0.00407239	0.0276372
FRMD6	-0.507315	6.32014	12.1597	0.000488331	0.00519943
COL11A1	-0.506279	7.13785	11.6051	0.000657697	0.00662358
REEP3	-0.504997	5.85312	11.473	0.000706138	0.00702687
C22orf39	-0.501279	4.70992	9.19609	0.00242532	0.018681
VPS26A	-0.501114	5.16364	9.16722	0.00246389	0.0188719
MARCH8	-0.5007	4.48485	8.74109	0.00311119	0.0224792
RALBP1	0.50053	7.3376	8.9889	0.00271625	0.0202389
RASGEF1A	0.501597	4.00184	7.46656	0.00628555	0.0381724
PPP4R1	0.503319	6.33225	10.9753	0.000923359	0.00862451
PEA15	0.503362	6.1591	9.58061	0.00196643	0.0158724
SEL1L3	0.503722	6.02889	8.96215	0.0027563	0.0204061
FBXW7	0.503896	5.24139	8.38155	0.00379048	0.0260764
CCDC66	0.504523	5.02299	8.74365	0.00310683	0.0224642
MFSD12	0.504603	5.7242	8.84764	0.00293468	0.0213923
MPHOSPH9	0.506054	5.88302	11.1908	0.000822034	0.00788336
GALE	0.506122	4.2661	8.10053	0.00442523	0.0293573
GRN	0.506955	7.15025	10.412	0.00125201	0.0111416
NKTR	0.507006	7.42632	8.72299	0.00314222	0.0226078
ZNF655	0.507013	4.65369	7.93267	0.00485501	0.0315147
NFATC2IP	0.507752	5.29654	9.52731	0.00202436	0.0161511
MZT2A	0.508168	5.67414	11.6814	0.000631293	0.00643073
PLEKHA1	0.50833	5.15802	9.50171	0.0020528	0.016312
BUD23	0.511775	5.61967	10.3104	0.00132283	0.0115938
LMO7	0.512912	6.36272	12.5087	0.000405072	0.00444811
MCM3AP	0.513159	5.6055	10.8386	0.000994079	0.00917695
UBN2	0.513196	5.21752	9.84621	0.00170182	0.0141499
GOPC	0.513381	5.58353	12.3613	0.00043832	0.00473725
CHMP1B	0.514346	5.07401	9.7716	0.00177228	0.014663
NA..66	0.514603	6.45342	12.2799	0.000457855	0.0049286
IQGAP3	0.514714	5.09938	9.71734	0.00182537	0.0150418
DPH2	0.515059	3.78116	6.88295	0.00870219	0.0488152
SNHG6	0.516742	6.82054	11.548	0.000678206	0.00679379
HIP1	0.516767	5.74368	12.4142	0.000426082	0.00463515
BTG3	0.516871	6.39527	11.9126	0.000557567	0.00578933
BRD2	0.517935	6.16541	12.4016	0.000428971	0.00465961
CMTM7	0.518931	5.09311	7.67812	0.00558944	0.0349566
TRIM44	0.519391	6.70318	11.1099	0.000858662	0.00818254
NINJ1	0.519703	5.28206	8.17383	0.0042499	0.0286227
SLC5A3	0.519896	7.04022	11.5213	0.000688027	0.00686478
KCTD7	0.520697	3.80672	7.01419	0.0080866	0.0461663
EDA2R	0.521502	4.03313	7.6261	0.00575294	0.0357565
ZNF248	0.522349	4.21766	7.27293	0.00700014	0.0413859
TMEM205	0.523171	3.9295	6.97021	0.00828779	0.0469766
LAMA5	0.523208	5.80123	7.56803	0.00594127	0.036565
PDIA5	0.523257	5.52948	7.74225	0.00539436	0.0340904
CAMK2D	0.523263	5.33677	10.8326	0.00099728	0.00920087
STX3	0.523402	4.82299	9.02568	0.00266213	0.0198848
TAF1D	0.523718	7.8417	8.05329	0.00454212	0.0299482
FUCA1	0.524222	4.97812	8.83769	0.00295073	0.0214762
CALD1	0.52523	7.98007	9.09243	0.00256669	0.0193931
GUSB	0.525506	5.44459	8.89494	0.00285962	0.0210059
PCCB	0.526381	3.99298	7.70785	0.00549812	0.0346129
CD44	0.52733	6.00722	9.6585	0.00188478	0.0153825
LTBR	0.528186	5.13102	9.06592	0.00260417	0.0196086
IFITM2	0.528545	5.12814	8.17012	0.0042586	0.028665
LAMB2	0.528564	5.17552	7.17983	0.00737276	0.0429499
PLPP3	0.528916	4.87501	9.11765	0.00253155	0.0192143
THAP12	0.528979	5.69698	12.8174	0.000343414	0.00389599
ZFP64	0.530642	4.86074	9.60339	0.00194219	0.0157697
SYTL4	0.53137	4.19719	8.14556	0.00431666	0.0289172
PRKRIP1	0.53166	4.16808	7.69068	0.00555066	0.0347863
FHL2	0.531958	5.48916	9.94975	0.00160871	0.0135402
UBE2H	0.533571	5.81104	12.6063	0.000384458	0.00426173
C15orf52	0.534085	4.444	9.15052	0.00248647	0.0189773
C17orf62	0.53471	4.45114	7.75079	0.0053689	0.0339722
HOXC8	0.535397	4.21603	9.052	0.00262408	0.0197081
CFAP97	0.536128	5.62309	11.9268	0.000553314	0.00575309
TRIM38	0.536901	4.23949	7.8456	0.00509446	0.0327238
HMGXB3	0.537046	4.28307	8.78982	0.00302916	0.0219621
TNS3	0.537433	4.35007	8.97309	0.00273985	0.0203566
LINC00963	0.539157	4.77577	9.54615	0.00200369	0.0160328
MDK	0.540804	6.74272	11.1597	0.000835925	0.00797866
SLC16A7	0.541129	5.39119	8.55435	0.00344698	0.0242561
NA..10	0.542423	3.96492	8.25963	0.00405364	0.0275472
MGEA5	0.543456	6.4839	13.4925	0.000239515	0.00292189
SPECC1	0.545275	5.57634	12.9392	0.00032177	0.00372334
DVL1	0.547514	3.69764	7.05436	0.00790725	0.0454523
VEGFA	0.548003	4.64725	7.85864	0.00505783	0.0325507
MLXIP	0.548222	5.11083	9.48665	0.00206973	0.0164032
HIPK2	0.54844	5.87775	12.8734	0.000333281	0.00382132
ASNS	0.548703	5.11055	7.85336	0.00507263	0.0326181
EP400NL	0.549098	4.10879	8.57883	0.00340093	0.0239881
FAM171A2	0.550127	4.36733	8.05515	0.00453745	0.0299436
NA..135	0.551217	5.07802	9.03646	0.00264648	0.019817
HILPDA	0.55154	4.08022	7.05637	0.00789839	0.0454188
EXOSC2	0.551628	3.93346	6.97044	0.00828672	0.0469766
SEPHS1	0.552222	5.03555	10.6039	0.00112852	0.0101668
SLC24A1	0.55534	4.63309	7.16298	0.00744235	0.0432666
TMBIM1	0.555918	5.52048	9.20757	0.00241016	0.0186022
LINC00470	0.55643	4.66474	10.629	0.00111325	0.0100795
TMEM141	0.556435	3.76019	7.79852	0.00522892	0.0332594
CEP104	0.556458	4.46682	8.57633	0.0034056	0.0240097
ZNF121	0.55648	4.7635	9.07174	0.0025959	0.0195745
LAYN	0.557114	6.6049	11.1655	0.000833323	0.00796122
SLC26A6	0.558121	4.15564	7.39236	0.00655013	0.0392394
KMT2E	0.558913	7.71734	15.1324	0.000100229	0.00143951
NUDT4	0.559546	4.17033	8.41146	0.00372862	0.0257804
HOXC6	0.5597	6.06552	14.5631	0.000135546	0.00183151
XPO6	0.560374	4.25714	9.04412	0.00263541	0.0197812
LINC00667	0.560449	5.64681	13.8384	0.000199221	0.00250461
FUCA2	0.561009	5.73938	9.50512	0.002049	0.0162903
AKR1B1	0.562507	5.15191	12.3642	0.000437647	0.00473369
BLVRB	0.564247	5.04458	10.609	0.00112536	0.0101525
ESYT2	0.564753	5.19876	11.6431	0.000644417	0.00652035
LRRC1	0.56499	4.19587	9.4117	0.00215605	0.0170068
GALNT17	0.56592	3.87306	7.13245	0.0075701	0.0438658
ARPC1B	0.566175	5.62937	12.0635	0.000514199	0.00540609
PARP9	0.569123	5.22544	12.0965	0.000505178	0.00534106
MRPL41	0.569964	5.08308	10.3343	0.00130584	0.0114892
MYO18B	0.569966	3.77141	7.58069	0.0058997	0.0363894
ZNF678	0.57281	3.86737	8.46001	0.0036304	0.0252286
TNFRSF1A	0.573331	6.91512	13.6456	0.000220752	0.00273059
EPB41L1	0.573433	4.69235	9.85325	0.00169532	0.0141114
SLC39A10	0.573705	7.62565	13.0401	0.000304896	0.00357198
PATJ	0.575055	5.36344	11.0409	0.000891213	0.00840765
PHLDA3	0.576219	4.28162	7.28581	0.00695012	0.0411436
EEA1	0.580188	6.90577	13.654	0.000219775	0.00272401
ELOVL1	0.580291	4.53242	8.30456	0.00395457	0.0269716
MEPCE	0.581145	4.01631	7.63631	0.00572049	0.0356211
NA..118	0.583084	5.68439	13.6851	0.00021616	0.00268924
ACBD5	0.583572	4.82335	12.0935	0.000505975	0.00534574
DIP2A	0.583637	4.54439	11.0437	0.000889869	0.00840765
ABL1	0.583806	5.51929	12.4232	0.000424035	0.00461931
AUTS2	0.583915	5.83857	14.8907	0.000113921	0.00160107
ERBB2	0.584275	5.88401	10.9096	0.000956686	0.00886435
NUDT16	0.584729	3.43121	7.63684	0.0057188	0.0356211
ANKIB1	0.588482	6.40297	16.7107	4.35e-05	0.000709829
SLC35B4	0.58873	4.83674	13.0361	0.00030554	0.00357674
NEU3	0.589009	3.41648	7.8154	0.00518028	0.0331179
CHCHD7	0.589478	4.64557	9.91584	0.00163862	0.0137001
ZBTB38	0.590554	5.83931	14.3653	0.000150555	0.00200376
ARID3A	0.591709	4.31494	10.9917	0.000915232	0.00857518
F8	0.591861	3.59837	7.41896	0.00645401	0.03891
NOVA1	0.592249	3.70823	9.31979	0.00226692	0.017685
STAT6	0.592285	4.88269	14.0304	0.000179877	0.0023064
AL365181.2	0.592707	4.13594	8.11445	0.00439138	0.0291842
PDSS1	0.593577	3.9122	8.15511	0.00429401	0.0288039
FAM160B2	0.59431	3.57372	6.9608	0.00833149	0.0471711
AMOTL1	0.595179	5.6923	15.2296	9.52e-05	0.00137777
DICER1	0.595878	6.69762	17.9811	2.23e-05	0.000399221
NOMO1	0.59666	4.47902	8.87548	0.00289026	0.0211587
FKBP10	0.596991	6.36894	12.907	0.000327359	0.003766
BYSL	0.597043	3.59885	7.99456	0.0046918	0.03068
ANKRD26	0.59711	6.52651	14.0081	0.00018202	0.002324
PPP1R9A	0.59731	5.54213	15.7037	7.41e-05	0.00111162
NA..172	0.59752	4.78091	11.0788	0.000873226	0.00828987
RASA2	0.597663	4.12768	10.4316	0.00123879	0.0110501
HOXD10	0.598153	4.95692	12.5002	0.000406917	0.00445862
ID3	0.598172	5.37201	13.8374	0.000199325	0.00250461
NUDT22	0.598431	4.01161	9.54625	0.00200358	0.0160328
DUSP3	0.598483	5.15831	10.5853	0.00113992	0.010247
ARL5B	0.59883	5.68723	15.3731	8.82e-05	0.00129192
CCDC14	0.59895	6.60966	12.5701	0.000391968	0.00432313
ZFYVE27	0.599341	3.54386	7.5603	0.00596681	0.0366473
NEAT1	0.600922	7.57915	9.08554	0.00257638	0.0194468
NDUFA5	0.602688	5.27992	12.4895	0.00040924	0.00448082
PLOD3	0.604175	6.02852	11.8736	0.000569345	0.00589542
AC092747.4	0.604769	3.50118	6.99362	0.00818008	0.0465061
TTC23	0.605629	3.54909	8.88248	0.0028792	0.0211085
CSPP1	0.60644	5.23705	14.7331	0.000123852	0.00170717
LIMK1	0.606984	4.06085	9.54795	0.00200172	0.0160328
NIPAL3	0.607054	4.12827	11.7377	0.00061247	0.00627089
MT2A	0.607842	8.05748	16.8567	4.03e-05	0.000664454
SLCO4A1	0.608915	3.46949	7.23038	0.00716801	0.0420862
FBXW5	0.609637	3.90593	9.85009	0.00169823	0.0141279
SBDS	0.609986	5.49088	11.6265	0.00065019	0.00656552
TOPBP1	0.610118	6.84625	19.1446	1.21e-05	0.00023991
SMPD1	0.610667	3.90918	8.56779	0.00342161	0.0241098
CCDC58	0.611284	4.93958	13.7161	0.000212621	0.00265177
PHPT1	0.611643	4.28445	11.8413	0.0005793	0.0059738
AK4	0.611653	4.11646	10.7968	0.00101675	0.00935187
CUL1	0.61301	4.41826	10.3475	0.00129648	0.011436
BICD1	0.613043	5.25752	14.5294	0.000137986	0.00186115
PBK	0.614854	6.15279	15.3098	9.12e-05	0.0013269
CPE	0.615001	5.22933	10.2798	0.00134491	0.0117532
ADGRB2	0.616392	3.82084	7.46588	0.00628792	0.0381724
TIMMDC1	0.616414	6.73185	18.3541	1.83e-05	0.000339906
WDR5	0.61709	4.25288	11.8533	0.000575607	0.00595202
LACTB2	0.617364	4.28475	11.9582	0.000544076	0.00567475
FZR1	0.617922	3.50403	8.03435	0.00458984	0.0302099
MT.TF	0.618651	8.99179	12.9313	0.000323139	0.00373345
SLC22A18	0.61889	4.2717	8.454	0.00364241	0.0253004
CDA	0.619264	3.34663	7.03176	0.00800764	0.0458545
PHACTR2	0.619339	6.53168	19.2492	1.15e-05	0.000229229
GPR158	0.623106	4.29379	11.2778	0.000784374	0.00759471
HSPG2	0.623254	4.54616	10.2252	0.00138535	0.0120576
PAQR7	0.624078	3.49144	7.99708	0.00468529	0.0306507
TSC1	0.625248	5.08222	14.3889	0.000148678	0.00198229
SLC9A1	0.627118	3.40126	7.54995	0.00600117	0.0368134
BNIP3L	0.627302	6.58443	19.4707	1.02e-05	0.000207704
RAB6B	0.627336	4.37154	12.5064	0.000405569	0.00445033
SPTBN2	0.627908	3.36353	8.12795	0.0043588	0.0290574
CTSH	0.628	4.92176	11.2065	0.000815116	0.00784131
SLC7A2	0.628396	4.25657	8.22657	0.00412815	0.0279316
XRN1	0.628867	6.10596	17.9665	2.25e-05	0.00040133
HDAC5	0.629308	3.06667	7.58428	0.00588795	0.0363706
RCC1L	0.629376	3.43268	6.96207	0.00832558	0.0471553
CEP250	0.629641	4.62203	11.8495	0.000576755	0.00595572
EHD1	0.631214	3.72881	7.43879	0.00638327	0.0385916
IL1RAP	0.631589	4.59533	7.86066	0.00505218	0.0325283
CPNE1	0.631887	4.5273	12.9562	0.00031886	0.0036925
PSMB9	0.633914	3.0089	7.48699	0.00621462	0.0378454
RANBP6	0.634751	3.96049	11.4252	0.000724539	0.00716356
CASKIN2	0.635077	2.98945	7.30087	0.00689214	0.0408968
UROD	0.635151	4.53354	10.374	0.00127804	0.0113331
CAV1	0.635234	7.06694	13.285	0.000267544	0.0032067
CTSF	0.635273	3.00784	7.40382	0.00650856	0.0391137
MRPS2	0.635478	3.42906	7.24414	0.00711329	0.0418465
KIAA1143	0.63575	4.91139	12.2038	0.000476925	0.00510323
GPR87	0.636811	4.2035	8.31236	0.00393761	0.0268921
MAP3K1	0.638957	5.28412	14.9442	0.000110738	0.00156508
ETS2	0.639098	4.68511	13.2403	0.00027399	0.00327064
GATAD1	0.639617	4.87025	12.8189	0.000343137	0.00389599
NA..286	0.64086	4.96053	9.81209	0.00173368	0.0143593
LIMA1	0.641308	6.97292	16.238	5.59e-05	0.000876681
CDV3	0.642943	7.56581	14.3634	0.0001507	0.00200393
SNX10	0.643469	3.40709	8.58355	0.00339213	0.0239371
ALPK1	0.64715	3.00059	7.26271	0.00704011	0.0415132
NTN4	0.647819	3.5969	7.63124	0.0057366	0.0356991
PPP2R3A	0.648179	4.94629	13.8865	0.000194193	0.00245239
PRKCE	0.648902	3.09595	7.58832	0.00587476	0.0363189
TMEM54	0.648918	4.12335	11.7183	0.000618884	0.00632188
NIT2	0.649609	4.19987	13.1994	0.000280037	0.00333257
MPP2	0.650358	3.39626	7.69794	0.00552838	0.0346899
MT.TL1	0.652219	9.45602	12.9836	0.000314235	0.00365863
TNPO2	0.652925	4.20084	13.752	0.000208597	0.00261224
AMOTL2	0.653354	6.2254	16.6735	4.44e-05	0.000722338
UBE2G2	0.653629	4.9188	14.5121	0.000139259	0.00187663
PHF11	0.653965	3.11581	8.0779	0.00448083	0.0296481
SYT16	0.654136	3.58731	6.95268	0.00836937	0.04735
SLC6A6	0.654375	5.06868	11.3294	0.000762905	0.00744173
GFOD2	0.654394	3.63451	9.90307	0.00165003	0.0137801
AGPAT2	0.655327	4.70522	12.3796	0.000434048	0.00470796
USP49	0.655882	3.57509	8.49926	0.00355291	0.0247815
WDR4	0.655943	3.10626	7.36004	0.00666894	0.0398707
ZBTB37	0.657024	3.63856	8.39115	0.00377051	0.0259984
ZNF107	0.658536	3.29499	8.15513	0.00429395	0.0288039
TMEM132D.AS1	0.658789	4.29486	9.13406	0.00250894	0.0191004
MRPS6	0.659606	5.29624	16.3175	5.36e-05	0.000846629
PURPL	0.659653	4.51614	8.74027	0.00311259	0.0224792
RAB3B	0.659884	5.86981	17.2115	3.34e-05	0.000569291
NA..311	0.659926	3.77996	7.60493	0.00582091	0.0360748
MORC3	0.661874	3.2598	8.53858	0.00347696	0.02441
LRRC58	0.662081	7.00634	21.2519	4.03e-06	9.48e-05
JDP2	0.663823	4.50059	10.6525	0.00109924	0.00997658
ANXA1	0.663934	7.31587	23.0074	1.61e-06	4.38e-05
GSTO2	0.664177	3.38501	9.10525	0.00254877	0.0193061
SNHG7	0.66471	3.72276	9.58858	0.00195792	0.0158166
PCLO	0.664734	7.37604	21.6797	3.22e-06	7.82e-05
DCAF8	0.664903	4.02595	11.6663	0.000636422	0.00646549
ANKRD13A	0.665357	3.05863	8.5282	0.00349686	0.024504
NR2F6	0.665399	4.67595	12.0875	0.000507605	0.00535544
ZFPM2.AS1	0.667439	3.13326	7.77299	0.00530332	0.0336562
SNHG5	0.668297	5.99029	8.52244	0.00350794	0.0245474
KRIT1	0.669075	4.85389	15.2775	9.28e-05	0.00134717
PEX1	0.670049	4.30742	13.3205	0.000262514	0.00316149
GADD45A	0.670487	5.23596	18.3557	1.83e-05	0.000339906
LRRC57	0.671802	3.78167	11.5243	0.000686936	0.00686478
CKB	0.671932	4.92272	14.994	0.000107854	0.00153007
KIAA1217	0.673103	4.58324	14.1165	0.000171832	0.00222216
SESN1	0.673572	3.40279	9.71296	0.00182973	0.0150556
FLNC	0.673935	5.05423	16.0856	6.05e-05	0.000937442
INPP1	0.674095	3.45789	9.35191	0.00222753	0.0174428
TTYH2	0.674118	4.05371	8.88069	0.00288203	0.021119
BRD3OS	0.674249	3.30454	8.02878	0.00460399	0.0302766
AFAP1	0.674295	2.94511	7.60133	0.00583253	0.0361319
MTND2P28	0.674536	5.84226	10.4175	0.00124824	0.0111146
TTC26	0.675027	3.49713	10.0856	0.00149436	0.0128535
ZKSCAN1	0.675309	6.5941	21.1649	4.21e-06	9.87e-05
RBM28	0.675789	5.10701	18.4092	1.78e-05	0.000332679
BRI3	0.675833	6.10471	13.3224	0.000262258	0.00316095
MFAP5	0.675959	4.77546	10.4621	0.00121849	0.0108884
DMTN	0.675961	2.89882	7.01289	0.00809252	0.0461747
NELFB	0.677198	3.66945	8.87687	0.00288806	0.0211529
SH2D5	0.677784	3.53291	8.47285	0.00360486	0.0250858
TFPI2	0.677839	4.00645	8.35522	0.0038458	0.0263847
CAV2	0.679959	4.56533	12.1648	0.00048701	0.00519183
ALKBH4	0.682846	3.22785	8.43287	0.00368498	0.0255255
PTTG1IP	0.683872	7.39089	19.8362	8.44e-06	0.000178342
MINDY3	0.684513	4.13375	14.004	0.000182423	0.0023252
UTRN	0.68501	7.23759	24.4675	7.56e-07	2.31e-05
MTSS1L	0.685086	3.65136	8.88867	0.00286946	0.0210576
CCND3	0.685233	3.52622	8.04428	0.00456475	0.0300579
BAIAP2.AS1	0.686514	4.57396	14.6287	0.000130904	0.00178731
C3orf62	0.68773	3.62854	11.3263	0.000764156	0.007442
EPAS1	0.687791	3.67592	9.81752	0.00172857	0.0143249
PCDHGA10	0.687981	3.10981	9.06208	0.00260965	0.0196291
ARHGEF10L	0.688603	3.49224	10.0838	0.0014958	0.0128535
RHOBTB2	0.68866	4.16347	9.74843	0.00179476	0.0148407
GPNMB	0.689947	5.20735	13.7454	0.000209337	0.00261515
RALGDS	0.691038	3.56589	9.59682	0.00194915	0.0157749
LRP10	0.691839	6.58111	22.9173	1.69e-06	4.51e-05
CPSF4	0.692786	3.90193	12.8498	0.000337508	0.00385581
PDLIM2	0.69281	5.85852	16.4724	4.94e-05	0.000796152
ZNF521	0.692819	2.70387	6.92954	0.00847833	0.0478192
RDH10	0.693012	5.24939	13.4147	0.000249665	0.00304078
PCNX2	0.694913	3.98001	11.058	0.000883048	0.00835679
JCAD	0.695503	2.65101	7.3423	0.00673506	0.0402181
TRIM56	0.695658	4.60858	16.9343	3.87e-05	0.000644209
CSPG4	0.695874	4.91942	13.5796	0.000228659	0.00280994
USF3	0.696127	5.86011	20.0965	7.36e-06	0.000159162
ZFP41	0.696811	3.91065	13.3494	0.000258507	0.00312073
SYNE1	0.69785	4.89956	17.0085	3.72e-05	0.000625738
RAPGEF1	0.698588	5.18181	18.7554	1.49e-05	0.000285202
THOC1	0.698754	6.26889	18.1153	2.08e-05	0.000376516
RASGRF1	0.699688	3.55551	10.9635	0.000929256	0.00866348
PNKD	0.700394	4.6299	14.3589	0.000151062	0.00200614
PTPRM	0.702544	5.22334	13.8575	0.000197207	0.00248837
E2F2	0.704627	2.8825	7.81806	0.00517268	0.033106
SLC8B1	0.705513	3.8824	11.3122	0.000769984	0.00748121
DAGLB	0.706361	4.70616	12.4806	0.000411208	0.0044991
ATRIP	0.707776	3.35179	9.11537	0.00253471	0.0192285
EXTL3	0.707996	6.35353	16.431	5.05e-05	0.000809525
FAM122B	0.708148	3.91317	10.0408	0.00153113	0.013092
PDE9A	0.708175	3.16242	9.16562	0.00246604	0.0188788
KIAA1549	0.709945	3.91539	12.4141	0.000426104	0.00463515
C19orf33	0.710304	3.62293	9.45737	0.00210302	0.0166408
PVT1	0.710921	4.91267	16.0269	6.24e-05	0.000960031
REXO4	0.711219	4.23558	13.0961	0.00029591	0.00348567
TUBB4B	0.712527	6.18249	14.7314	0.000123964	0.00170717
VAV2	0.713107	3.05781	8.07749	0.00448184	0.0296481
SEC22A	0.714355	4.51478	15.1862	9.74e-05	0.00140843
HOXA5	0.714631	2.76505	7.47958	0.00624026	0.0379686
POLH	0.714829	3.20361	8.8019	0.00300916	0.0218441
SDC4	0.715684	5.68291	18.0537	2.15e-05	0.000386571
SMO	0.716228	4.46861	15.3373	8.99e-05	0.0013115
GAB2	0.716436	2.94716	8.73647	0.00311907	0.0224792
SYT1	0.716935	3.99202	11.9515	0.000546023	0.00568513
SURF6	0.717199	4.25035	13.6021	0.000225929	0.00278319
GPR162	0.717205	3.38809	8.15978	0.00428296	0.028775
CTDSPL	0.717628	4.53838	18.0255	2.18e-05	0.000391409
EGFL7	0.717699	3.6265	9.69319	0.00184952	0.0151833
NFKBIL1	0.718367	3.6122	8.30453	0.00395462	0.0269716
NCF2	0.719017	4.86116	14.6056	0.000132522	0.00180196
WDR60	0.719265	4.50634	14.2465	0.000160361	0.00210636
NDUFV3	0.721748	5.37813	20.0117	7.7e-06	0.000164956
NRP1	0.721906	5.81003	16.3948	5.14e-05	0.000823367
LAMA1	0.721957	5.95983	22.0989	2.59e-06	6.47e-05
KDM2B	0.722189	4.83143	18.9338	1.35e-05	0.000262743
TTC39B	0.722496	3.00784	8.85841	0.00291742	0.0212955
MOXD1	0.722833	5.64167	18.7873	1.46e-05	0.000281186
MSL2	0.724717	5.28765	21.2797	3.97e-06	9.36e-05
MTND4P12	0.725608	3.13704	7.81015	0.00519535	0.0331745
RBM33	0.72584	4.85392	18.925	1.36e-05	0.000263628
DGKE	0.72787	4.16584	10.7218	0.0010588	0.00966778
CISD3	0.729155	4.31299	12.8424	0.000338844	0.00386744
EPM2AIP1	0.729428	6.25867	26.0246	3.37e-07	1.13e-05
CDK5	0.729919	2.64747	7.74644	0.00538185	0.0340256
AP001505.2	0.730082	2.59108	7.17929	0.00737498	0.0429499
ZNF800	0.730564	4.16278	14.7405	0.000123366	0.00170517
TMEM25	0.732133	3.55042	11.2888	0.000779752	0.00755482
CCDC80	0.732368	6.51538	19.9274	8.04e-06	0.000171904
SH3RF2	0.732732	3.59536	10.9364	0.000942915	0.0087529
C21orf58	0.733184	4.15953	9.74085	0.00180217	0.0148857
MCM10	0.735094	5.93856	25.0936	5.46e-07	1.73e-05
FAIM	0.737405	2.93946	8.17855	0.00423887	0.028574
TRIM6	0.737436	4.81068	19.0613	1.27e-05	0.000247359
DLST	0.738577	2.74124	7.88552	0.00498322	0.0322322
USP6NL	0.739695	4.44117	16.5163	4.82e-05	0.000780554
TMEM70	0.739747	4.13191	14.0121	0.000181638	0.00232182
LINC00839	0.740024	3.12665	10.69	0.00107716	0.00979986
ABCC3	0.740134	3.58693	11.18	0.00082686	0.00792114
PTCD1	0.740277	3.34854	10.6407	0.00110628	0.0100224
AC021078.1	0.741639	4.93861	14.004	0.000182419	0.0023252
COL27A1	0.741779	3.06418	6.9158	0.00854372	0.0481375
MKLN1	0.744425	5.0489	19.7815	8.68e-06	0.000182179
TUBB6	0.745477	7.84776	16.3792	5.19e-05	0.000829305
TTC3P1	0.745481	5.22843	22.2501	2.39e-06	6.06e-05
AP1S1	0.747239	4.05729	11.2088	0.00081411	0.00784131
ARHGEF19	0.747643	3.60593	12.4464	0.000418787	0.00457538
GABBR1	0.747752	3.65462	12.6259	0.000380445	0.00422698
RSU1	0.748013	5.22512	19.9122	8.11e-06	0.000173026
PIP4K2A	0.748706	5.22055	21.3999	3.73e-06	8.87e-05
MRAS	0.749192	4.68104	15.04	0.000105257	0.00149745
ZNF311	0.7498	2.27907	7.26541	0.00702953	0.041505
CDS1	0.750126	4.87658	17.7597	2.51e-05	0.00044216
SURF1	0.75063	4.42979	18.4599	1.74e-05	0.000324753
SERPING1	0.750892	4.73016	21.2974	3.93e-06	9.29e-05
SESN2	0.75249	4.77543	14.9686	0.000109313	0.00154785
RABGEF1	0.753211	2.70225	9.18484	0.00244027	0.0187769
TFDP2	0.753994	3.14557	9.16901	0.00246148	0.018863
CEP63	0.755115	5.45613	22.3841	2.23e-06	5.73e-05
FIGN	0.755452	4.74006	16.3632	5.23e-05	0.000833737
TMEM200B	0.757265	2.45339	6.93065	0.00847308	0.0478192
MMP15	0.762351	3.23474	9.37236	0.00220282	0.0172943
NR2F2	0.763234	7.03453	26.2695	2.97e-07	1.01e-05
SLC25A36	0.763552	5.98096	24.1269	9.02e-07	2.67e-05
TMEM203	0.764727	3.65512	12.6658	0.000372413	0.00414999
MOCOS	0.76533	3.00901	11.3276	0.000763617	0.00744173
SLC46A1	0.766705	2.48713	7.71611	0.00547301	0.0345274
BAIAP2L1	0.767083	5.65576	24.2541	8.44e-07	2.53e-05
PCDHB10	0.768839	2.8219	6.89783	0.00863003	0.0485149
ANKRA2	0.769568	3.28244	10.1887	0.00141304	0.012261
SLC16A1.AS1	0.770447	4.92008	17.0019	3.73e-05	0.000626093
ANKRD34A	0.771595	2.36176	7.28336	0.00695963	0.0411837
SUV39H2	0.772497	3.72664	12.2406	0.000467619	0.00501792
CCNYL2	0.772585	3.13066	9.84376	0.00170409	0.0141609
ALDH3B1	0.772931	4.5551	20.1643	7.11e-06	0.000154505
ZBTB20	0.773456	5.86216	25.2948	4.92e-07	1.6e-05
FRMD4A	0.773559	2.71262	8.92785	0.00280855	0.0207145
STARD9	0.773585	3.54325	9.69575	0.00184694	0.0151723
ZNF33A	0.77493	5.63856	24.315	8.18e-07	2.47e-05
GGA3	0.775576	3.1787	10.5204	0.00118066	0.0105754
CCDC144B	0.775932	4.65182	13.2701	0.000269668	0.00322702
MAN1B1	0.776857	4.30043	13.3378	0.00026011	0.00313757
SLC37A1	0.777359	2.70663	9.55547	0.00199355	0.0160271
NA..104	0.777457	6.25651	28.2801	1.05e-07	3.91e-06
BBS10	0.778423	2.35467	7.94043	0.00483422	0.0314204
LINC02381	0.778881	2.96341	9.15385	0.00248196	0.0189621
TPCN1	0.778924	3.38221	11.0368	0.0008932	0.00841809
LTBP3	0.780585	4.78013	15.49	8.29e-05	0.00122155
SCN9A	0.781298	3.43859	12.9894	0.000313265	0.00365532
BTN2A2	0.782627	2.99661	10.1431	0.00144841	0.0125413
SMAD9	0.782822	3.13623	10.3264	0.00131142	0.0115206
LINC01436	0.783081	3.85799	14.596	0.000133196	0.00180658
DPH7	0.785139	2.96244	9.05819	0.00261521	0.0196513
AC009237.3	0.785641	3.46676	10.3451	0.00129821	0.0114379
GPC3	0.786502	2.9465	8.91721	0.00282496	0.0208122
GALM	0.786633	3.26077	9.6023	0.00194334	0.0157697
CLSTN3	0.787684	4.55127	10.2143	0.00139354	0.0121218
RAB31	0.787774	6.82161	19.2821	1.13e-05	0.000226505
GNG11	0.787871	2.90932	9.96365	0.00159661	0.0134684
GIGYF1	0.788096	4.63265	13.0635	0.000301104	0.00353981
PODXL	0.788437	6.17102	13.8197	0.000201216	0.00252416
QTRT2	0.789684	4.94075	24.1495	8.91e-07	2.65e-05
INPP5B	0.790078	3.10672	10.7899	0.00102054	0.0093753
NME6	0.790393	3.59938	9.86766	0.00168209	0.0140168
HLA.F.AS1	0.791087	2.26026	6.99626	0.008168	0.0464549
TRDMT1	0.791249	3.27086	9.39433	0.00217657	0.0171418
ZHX3	0.791469	2.6444	8.04619	0.00455995	0.0300395
SLC2A6	0.791971	4.67661	20.5139	5.92e-06	0.000132135
CDC123	0.792061	4.62883	20.0273	7.63e-06	0.000164076
LRRC3	0.792805	4.14914	15.15	9.93e-05	0.00142889
RORA	0.792872	3.90338	14.0857	0.000174667	0.00225109
ARSJ	0.793124	5.95222	21.5183	3.5e-06	8.41e-05
LMBR1	0.794035	4.74988	20.8737	4.91e-06	0.000112157
RABL6	0.795432	4.92321	19.3162	1.11e-05	0.000223444
UCK1	0.795694	2.67808	8.83234	0.00295939	0.0215288
SLC25A43	0.796305	2.35126	7.76407	0.00532956	0.0337517
FAM109A	0.79672	2.28015	7.16319	0.00744149	0.0432666
TACC2	0.79698	2.3304	7.94201	0.00483003	0.0314066
PPP1R35	0.797031	2.92727	10.6011	0.0011302	0.0101718
TXNRD1	0.798843	6.91255	17.6239	2.69e-05	0.000469379
SORBS3	0.798988	2.87473	9.03684	0.00264593	0.019817
ZNF675	0.799488	2.7647	9.14314	0.00249653	0.0190251
NA..4491	0.800291	3.61112	15.0823	0.000102926	0.00147124
FAM207A	0.800592	2.37087	7.98135	0.00472617	0.0308512
AC135050.6	0.80117	2.17627	7.40114	0.00651827	0.0391288
POU3F3	0.802296	4.43923	17.393	3.04e-05	0.000523326
TMEM173	0.802697	2.81734	9.4908	0.00206504	0.0163847
PROSER2	0.80299	3.30466	12.6353	0.000378521	0.0042087
PRTFDC1	0.803502	3.6668	15.1363	0.00010002	0.00143789
AJ011932.1	0.805177	2.60557	7.01707	0.00807365	0.0461098
LAMB3	0.805443	5.97371	20.2194	6.9e-06	0.000150768
EIF2B3	0.806522	4.75692	20.9247	4.78e-06	0.000109544
MT.TT	0.806598	4.15113	13.3591	0.00025717	0.00311457
TRIM22	0.807184	2.84427	9.69242	0.0018503	0.0151833
TK2	0.808562	3.53693	13.9903	0.000183757	0.00234022
GALNT11	0.809524	3.43519	11.8169	0.000586954	0.00604446
PGPEP1	0.809637	3.68086	9.74482	0.00179829	0.0148618
MPPE1	0.813341	4.50603	16.2475	5.56e-05	0.000873225
RTL5	0.813818	2.62793	7.37628	0.00660898	0.0395437
FAM107B	0.81409	4.39133	20.4838	6.01e-06	0.00013403
NDUFV2	0.81469	6.06417	25.1068	5.42e-07	1.72e-05
PCSK7	0.81503	3.90597	12.6817	0.00036925	0.00412083
FAM171A1	0.816915	7.43417	32.6111	1.13e-08	5.37e-07
MARVELD1	0.819244	4.91911	23.0061	1.61e-06	4.38e-05
WAC.AS1	0.819616	4.59775	21.0957	4.37e-06	0.00010174
NA..4405	0.820101	3.24353	11.4718	0.000706617	0.00702699
NA..137	0.82035	3.44466	15.0766	0.000103234	0.00147323
WRB	0.821838	3.76525	14.1786	0.000166247	0.00216106
NA..207	0.822954	2.71887	10.4673	0.00121503	0.0108703
RAB12	0.823726	6.31298	26.7752	2.29e-07	7.9e-06
MCTP2	0.823954	2.74907	7.95702	0.00479013	0.0312146
USH1C	0.825677	3.42343	14.6261	0.000131088	0.00178731
SCN2B	0.829381	2.10138	7.11501	0.00764412	0.0442437
GTPBP3	0.829792	3.04725	11.5625	0.000672965	0.00675475
XAGE5	0.833046	2.73188	8.74334	0.00310735	0.0224642
SBDSP1	0.834093	3.21291	12.0876	0.000507583	0.00535544
MSRB2	0.834676	4.02464	19.4379	1.04e-05	0.000210444
AMIGO1	0.835417	2.90327	10.9935	0.000914316	0.00857518
MYO3A	0.835458	3.94696	19.1813	1.19e-05	0.00023565
NA..301	0.835839	3.2813	12.5819	0.000389491	0.0043021
IFI27L1	0.836279	2.10101	8.0082	0.0046566	0.0305323
SYT12	0.8374	2.26797	7.9059	0.00492737	0.0319294
GAGE1	0.838113	5.46904	25.1372	5.34e-07	1.7e-05
ANKRD20A5P	0.840191	4.31671	11.9667	0.000541591	0.00565462
MECR	0.84335	2.59431	9.43322	0.0021309	0.016826
L3MBTL4	0.844293	2.79031	10.0269	0.00154271	0.013127
PDE2A	0.847673	2.89773	8.01849	0.00463022	0.0304224
RHEB	0.848858	3.68754	17.6772	2.62e-05	0.000457489
PCDHB16	0.849439	4.30355	14.4151	0.000146624	0.00196358
C7orf31	0.8495	1.93563	6.88018	0.0087157	0.0488689
SLC27A6	0.849501	3.03605	9.29445	0.0022985	0.0178685
ZNF273	0.85039	3.01279	12.0209	0.000526076	0.0055079
TPD52L1	0.852607	2.85217	11.0416	0.000890904	0.00840765
PCBP4	0.853127	6.21754	29.5422	5.47e-08	2.19e-06
ADM	0.854166	2.69338	8.18282	0.00422889	0.028545
SH3D19	0.854784	3.54646	15.3748	8.82e-05	0.00129192
POM121C	0.857866	4.96318	27.1283	1.9e-07	6.64e-06
CAPRIN2	0.858207	4.58704	19.8355	8.44e-06	0.000178342
BPHL	0.861291	1.97574	7.44828	0.00634972	0.038466
ADCY5	0.861787	2.09584	7.87105	0.00502325	0.0324251
PPP2R2A	0.862194	7.35718	37.7249	8.15e-10	5.09e-08
DGKA	0.864903	3.66025	16.4498	5e-05	0.000803234
DUS4L	0.866454	3.33913	14.7646	0.000121801	0.00168974
NPDC1	0.868654	3.50234	15.5511	8.03e-05	0.00118851
MT.TV	0.868856	5.74967	22.9197	1.69e-06	4.51e-05
SHTN1	0.868921	5.79727	30.6404	3.11e-08	1.31e-06
AQP1	0.869469	4.23946	20.6623	5.48e-06	0.000123483
IL31RA	0.869566	4.88951	23.8553	1.04e-06	3.02e-05
BDNF	0.869911	4.44845	23.4071	1.31e-06	3.68e-05
GOLGA8B	0.869945	2.64228	8.86743	0.00290304	0.0212213
PSMG1	0.871639	4.42487	22.7201	1.87e-06	4.9e-05
MCM3AP.AS1	0.872041	3.39705	11.347	0.000755688	0.00740415
AC112220.4	0.872638	2.17031	7.32562	0.00679784	0.0404647
ACBD4	0.873979	2.50424	9.13977	0.00250113	0.0190505
AL109918.1	0.874045	3.85124	18.7339	1.5e-05	0.000287334
TRIP6	0.876194	4.94263	25.4611	4.51e-07	1.48e-05
ANO2	0.876621	3.90383	18.3338	1.85e-05	0.000343122
NA..218	0.876794	3.21264	12.6547	0.00037463	0.00417161
VGF	0.878726	5.49418	22.4174	2.19e-06	5.64e-05
TTF1	0.878988	5.22937	31.1646	2.37e-08	1.04e-06
TMEM250	0.879171	3.63371	15.9666	6.45e-05	0.0009881
ACSS3	0.87973	2.59504	10.0124	0.00155493	0.0131981
ATP6V1F	0.880773	4.2342	20.6562	5.5e-06	0.000123584
GPR39	0.882462	1.88749	7.34868	0.00671121	0.0400916
CASC8	0.882679	2.23784	7.87759	0.00500512	0.0323497
UBE2Q2P2	0.882913	2.9285	11.042	0.000890709	0.00840765
NA..4496	0.884954	2.27607	9.14504	0.00249394	0.0190166
ACOT4	0.885249	2.1381	8.13986	0.00433027	0.0289697
PLEKHH3	0.886916	3.75783	16.1792	5.76e-05	0.000898693
KAZALD1	0.887343	2.48079	9.8364	0.00171092	0.0142099
TSPAN10	0.887775	3.51767	14.3953	0.000148173	0.0019773
CD70	0.888332	4.70275	21.3131	3.9e-06	9.23e-05
STC1	0.891155	3.79412	14.4546	0.000143581	0.00192626
RAD52	0.891602	3.18676	11.3414	0.000757985	0.00741545
YPEL3	0.894894	3.21083	15.7632	7.18e-05	0.00108584
FAHD2A	0.895001	3.02325	11.0684	0.00087813	0.00832593
POLQ	0.89528	5.5397	17.7969	2.46e-05	0.000434613
RHOBTB3	0.895577	8.28034	34.2445	4.86e-09	2.51e-07
ABCA2	0.895798	2.59137	8.84346	0.00294141	0.0214291
HMGN1	0.895841	5.62025	36.8432	1.28e-09	7.65e-08
SLC19A1	0.896272	4.40406	20.9707	4.66e-06	0.000107598
PARP14	0.896303	6.87473	39.1347	3.96e-10	2.71e-08
RNU4ATAC	0.89853	8.61222	21.2064	4.12e-06	9.69e-05
EZH2	0.898982	5.666	33.4764	7.21e-09	3.64e-07
NA..134	0.899024	5.96272	36.7929	1.31e-09	7.79e-08
ITIH5	0.899514	3.23139	15.5345	8.1e-05	0.0011966
HSPBAP1	0.899725	2.68179	11.4439	0.000717307	0.00711594
ZNF440	0.901704	2.66812	12.1875	0.000481107	0.00514068
SIM2	0.90216	2.12846	8.16954	0.00425998	0.028665
PRRT3	0.902533	4.53541	20.6449	5.53e-06	0.00012413
GPR155	0.902867	3.42334	14.3986	0.000147913	0.00197558
NSMF	0.904974	2.77994	13.294	0.000266252	0.00319422
AC080100.1	0.906216	3.02906	12.732	0.00035945	0.00403237
TP53TG1	0.907673	2.39995	10.3597	0.00128797	0.0113876
TSPAN4	0.907973	5.29175	22.9588	1.66e-06	4.43e-05
CYP4F11	0.909719	1.79305	7.39476	0.00654141	0.0392394
COL8A1	0.915647	2.69632	9.6846	0.00185818	0.0152232
NEK10	0.915823	2.78628	10.572	0.0011481	0.0103145
ADIRF.AS1	0.916308	2.75207	10.299	0.00133103	0.0116521
NBEAL2	0.916371	2.22173	9.49009	0.00206585	0.0163847
NMT2	0.916584	5.30791	30.4913	3.35e-08	1.4e-06
HDAC11	0.918629	2.38708	9.21317	0.00240281	0.0185645
ANKRD13D	0.919945	2.32544	9.65441	0.00188897	0.0154035
WDR27	0.920079	2.67817	9.2586	0.00234392	0.0181747
HTR7P1	0.92029	3.27603	16.0762	6.08e-05	0.00094016
TRNP1	0.920294	3.62872	18.5377	1.67e-05	0.000314499
FKBP11	0.920486	3.02205	12.1646	0.000487052	0.00519183
SLC4A3	0.920931	2.32032	9.7952	0.00174968	0.0144839
BRWD1	0.921083	4.85986	29.935	4.47e-08	1.82e-06
RAP1GAP2	0.92253	2.53979	10.426	0.00124252	0.0110702
SSH3	0.923451	2.29462	10.2721	0.00135056	0.0117957
MAPKAPK3	0.926057	4.3885	16.8653	4.01e-05	0.000662188
TTC3	0.927282	7.4105	42.6979	6.39e-11	5.09e-09
C5orf56	0.927844	2.44302	8.53872	0.0034767	0.02441
MPP7	0.930439	4.55335	27.8374	1.32e-07	4.83e-06
UBE2Q2P1	0.931351	3.40509	17.0752	3.59e-05	0.000608209
ACADS	0.934731	2.42742	9.10225	0.00255296	0.0193281
SLC44A3	0.935652	2.05305	8.71099	0.00316298	0.0226813
MOSPD1	0.936219	2.34966	10.188	0.0014136	0.012261
DOK4	0.93633	3.33304	15.0366	0.000105447	0.00149874
PARP3	0.937925	3.29122	17.7551	2.51e-05	0.000442715
ZNF426	0.937967	2.04402	8.39016	0.00377257	0.0260007
TPRN	0.938461	2.28791	10.1183	0.00146803	0.0126675
AL391244.1	0.938865	2.27809	9.93869	0.00161841	0.0136065
DHRS13	0.938872	4.05779	23.4017	1.31e-06	3.68e-05
GDAP1	0.94162	3.11644	16.4209	5.07e-05	0.000812965
UPF2	0.947031	5.98006	34.0896	5.26e-09	2.69e-07
ZMYND19	0.94769	3.02274	13.5822	0.000228336	0.00280825
UST	0.948637	2.20886	7.23643	0.00714387	0.0419774
NA..299	0.948734	3.41185	19.8859	8.22e-06	0.000174926
AC092447.7	0.948969	4.81363	19.2584	1.14e-05	0.000228422
AC078846.1	0.949956	2.83974	11.4007	0.000734146	0.00722918
AP001033.2	0.951371	2.17969	8.7605	0.00307825	0.0223073
CLEC2B	0.953324	4.56023	26.6797	2.4e-07	8.24e-06
NA..332	0.953388	4.8678	27.7272	1.4e-07	5.08e-06
ABCG2	0.953823	2.22378	8.17965	0.00423629	0.028574
PDK1	0.954775	2.86755	7.71124	0.0054878	0.0345649
SNX22	0.955358	2.55146	11.9376	0.000550131	0.00572394
ZNF37A	0.955407	5.8351	40.6404	1.83e-10	1.32e-08
EFNB3	0.957783	4.22006	18.3981	1.79e-05	0.000333791
ETFBKMT	0.958328	1.75938	7.58282	0.00589271	0.0363772
DOPEY2	0.958701	2.31209	10.2364	0.00137693	0.0119982
AC089983.1	0.958715	2.90487	15.723	7.33e-05	0.00110335
CNTN4	0.960223	2.75149	14.6924	0.000126557	0.00173969
NUDT5	0.960351	5.22686	37.4252	9.5e-10	5.84e-08
AC093010.3	0.961201	5.52016	35.3972	2.69e-09	1.48e-07
KLHDC8B	0.961364	3.55116	16.6051	4.6e-05	0.000746438
NA..75	0.962321	2.38847	11.5456	0.000679113	0.00679835
DYSF	0.963135	1.66497	7.58463	0.00588681	0.0363706
PCOLCE	0.963311	5.67563	38.5029	5.47e-10	3.52e-08
CEP70	0.9638	5.54642	37.5256	9.02e-10	5.59e-08
AC090114.2	0.964673	2.44428	12.265	0.000461539	0.00496093
SH3RF1	0.969465	4.20708	28.3331	1.02e-07	3.83e-06
SPTB	0.970252	1.91133	7.78404	0.00527098	0.0334792
HSPA14	0.97093	4.53871	29.1545	6.68e-08	2.62e-06
ZNF777	0.97393	1.80006	8.28709	0.00399279	0.0271827
PLEKHH2	0.976065	3.29623	14.4579	0.000143331	0.00192619
FADS3	0.976424	5.11344	34.197	4.98e-09	2.56e-07
FAM162A	0.977356	5.88715	42.397	7.45e-11	5.85e-09
AC007382.1	0.978397	2.93828	11.7182	0.000618928	0.00632188
ZNF662	0.978824	1.84315	9.21402	0.00240169	0.0185645
AC113383.1	0.98009	1.71644	7.45374	0.00633048	0.0383648
AC004846.1	0.980148	2.90931	13.9885	0.000183933	0.00234048
ARSI	0.98094	3.92823	23.5564	1.21e-06	3.46e-05
PLK3	0.981168	2.30354	10.2844	0.00134163	0.0117381
HOXD9	0.983216	2.37317	11.3644	0.000748663	0.00734811
FAM83H	0.983354	4.4302	27.9524	1.24e-07	4.57e-06
IMPDH1	0.984949	3.06027	14.5892	0.000133676	0.00181112
GPR1	0.986389	2.2291	9.5476	0.00200211	0.0160328
AL590004.4	0.987019	6.09105	35.6927	2.31e-09	1.28e-07
AOX1	0.987533	1.79525	7.08368	0.00777889	0.0448606
XRCC2	0.9883	3.78024	19.6716	9.2e-06	0.000190828
CPA4	0.989541	6.57267	31.2298	2.29e-08	1.01e-06
METTL7A	0.989617	2.02344	8.29592	0.00397343	0.0270876
GPR156	0.991017	3.70386	23.4197	1.3e-06	3.66e-05
PPP2R5B	0.991749	1.7407	8.02131	0.00462301	0.0303884
DTX3L	0.992079	5.98326	30.92	2.69e-08	1.16e-06
HMOX1	0.992156	4.52054	19.6937	9.09e-06	0.000189161
SLC12A9	0.993285	3.84208	23.564	1.21e-06	3.45e-05
ABCB4	0.993692	2.39529	11.4793	0.000703748	0.00701198
TMEM120B	0.996703	3.86373	25.6416	4.11e-07	1.36e-05
DZIP1L	0.997633	3.90483	23.3126	1.38e-06	3.84e-05
C1S	0.99777	2.1599	8.44455	0.00366138	0.0253894
FIBCD1	0.999941	3.62959	21.7414	3.12e-06	7.62e-05
DDX31	0.999992	2.81393	13.8531	0.000197673	0.00249217
CAPS2	1.00044	1.69601	8.36405	0.00382717	0.0263048
AIF1L	1.00082	3.28964	15.1748	9.8e-05	0.00141427
NUB1	1.00271	5.15642	34.3581	4.58e-09	2.39e-07
PAXIP1	1.00616	2.72681	10.9949	0.000913636	0.00857518
DYRK1A	1.00622	5.31761	42.9789	5.53e-11	4.51e-09
KIF13B	1.00801	4.29843	29.6047	5.3e-08	2.13e-06
AP1S3	1.01109	2.37109	13.5598	0.000231081	0.00283507
TSPYL2	1.01363	4.03289	28.017	1.2e-07	4.43e-06
AC108693.1	1.01529	2.96492	8.88256	0.00287907	0.0211085
MYBL1	1.01552	4.20109	29.4192	5.83e-08	2.32e-06
SURF2	1.01962	2.54662	13.1464	0.000288077	0.00340975
RIN1	1.02144	2.28595	8.52573	0.0035016	0.0245258
SYTL3	1.02233	3.05255	18.8089	1.44e-05	0.000278372
BACE2	1.02254	5.26393	38.8971	4.47e-10	2.99e-08
TRIM16	1.02325	3.03899	19.2151	1.17e-05	0.000232425
SAMD9L	1.02564	3.10753	19.6171	9.46e-06	0.000195275
SCARA3	1.02685	6.51397	36.4727	1.55e-09	8.97e-08
COMMD3	1.02713	5.87719	48.4122	3.45e-12	3.49e-10
ALOX12P2	1.02754	2.01745	8.63671	0.00329455	0.0234365
ATP6V1A	1.02979	5.64342	40.7287	1.75e-10	1.27e-08
HYAL3	1.03083	2.78894	14.9543	0.000110146	0.00155818
FBXO16	1.03294	2.60562	14.4001	0.000147792	0.00197558
TRIM35	1.03385	3.18704	20.082	7.42e-06	0.000160136
SCN2A	1.03453	2.97033	19.1818	1.19e-05	0.00023565
ENGASE	1.03538	1.93477	7.21284	0.0072384	0.0424169
LINC00324	1.03541	2.55148	12.7446	0.000357037	0.00401128
ATP6V0E2	1.036	3.77146	21.9031	2.87e-06	7.06e-05
ABCF2	1.03874	4.10263	25.0941	5.46e-07	1.73e-05
NA..145	1.03996	8.42868	56.0694	7e-14	9.17e-12
URGCP	1.04255	2.27765	10.6185	0.00111965	0.0101131
HSPD1P11	1.04271	2.28287	9.28063	0.00231589	0.0179759
OR7E38P	1.04706	2.90611	16.192	5.72e-05	0.000893567
KMT2C	1.04797	5.75533	47.0345	6.97e-12	6.82e-10
AGER	1.05008	2.03804	7.30503	0.00687618	0.0408812
BICDL1	1.05025	2.62472	11.6985	0.000625513	0.00638049
UBE3C	1.05128	4.68666	38.5547	5.32e-10	3.46e-08
SAMD10	1.05174	1.74886	8.1103	0.00440144	0.0292381
PLAGL1	1.05206	4.17981	24.1554	8.89e-07	2.65e-05
CLUHP3	1.05389	2.37516	10.5897	0.0011372	0.0102287
MATN2	1.05418	5.74469	31.9509	1.58e-08	7.33e-07
MCF2L2	1.05444	2.11075	10.3376	0.00130346	0.0114774
NA..243	1.05558	4.11413	29.2532	6.35e-08	2.5e-06
PPARG	1.05569	2.43947	12.7028	0.000365112	0.00408373
KLC3	1.05828	1.75888	6.93623	0.0084467	0.0477337
AP000919.1	1.06098	2.18193	9.12778	0.00251757	0.0191274
ADAM15	1.06338	5.04356	35.982	1.99e-09	1.12e-07
TLR6	1.07253	3.40203	18.0136	2.19e-05	0.000393395
LINC01089	1.07258	2.34013	14.2088	0.000163605	0.00213779
AC024940.1	1.0744	2.92141	18.7443	1.49e-05	0.000286139
HOMER3	1.07665	3.76234	21.748	3.11e-06	7.6e-05
AP001094.2	1.07676	1.86119	8.3524	0.00385177	0.0264137
BNC2	1.07718	5.26992	38.9995	4.24e-10	2.86e-08
CLDN1	1.07965	4.60895	27.5251	1.55e-07	5.54e-06
LRP5L	1.07993	2.16273	10.7427	0.00104692	0.00956508
MT.TY	1.08076	4.63529	24.292	8.28e-07	2.49e-05
TMUB1	1.08202	2.92433	18.6372	1.58e-05	0.000300381
HYPK	1.08361	1.35612	7.30265	0.00688529	0.0408897
EGLN3	1.0837	1.76806	9.28346	0.00231232	0.0179574
KCNQ3	1.08448	2.78587	16.0512	6.17e-05	0.000950716
ZNF282	1.08492	2.31504	12.8812	0.000331902	0.0038084
APBA2	1.08739	1.70933	9.22728	0.00238436	0.0184503
GRAMD1C	1.08766	2.3288	10.083	0.00149642	0.0128535
HLA.DPA1	1.08853	2.36926	14.6156	0.00013182	0.00179566
LINC01234	1.089	3.25608	17.7402	2.53e-05	0.000444226
NA..2583	1.0918	1.93932	9.654	0.00188939	0.0154035
TPRG1L	1.09387	2.88147	18.2809	1.91e-05	0.000351074
PLA2R1	1.09421	2.84584	13.3887	0.000253142	0.00307224
RAB3IL1	1.09673	1.85366	8.42695	0.003697	0.025597
SDCCAG3	1.09755	3.55148	23.6021	1.18e-06	3.41e-05
PPP1R26	1.0976	3.05252	20.387	6.33e-06	0.000139948
NOP14.AS1	1.09935	2.16018	12.7826	0.000349862	0.00394549
NA..3494	1.10254	3.66741	28.0274	1.2e-07	4.43e-06
AVPI1	1.10403	2.40149	11.737	0.000612688	0.00627089
RHBDL2	1.10756	2.35335	13.6145	0.000224441	0.00276939
PKP3	1.10808	2.36794	11.3316	0.000761979	0.00744004
SLC26A11	1.10826	3.61482	25.2255	5.1e-07	1.64e-05
UPP1	1.11067	3.34264	25.2456	5.05e-07	1.63e-05
GPC2	1.1118	2.46985	13.017	0.000308674	0.00360782
FAM69B	1.11598	3.27974	25.1591	5.28e-07	1.69e-05
CD27.AS1	1.11719	2.7279	15.1844	9.75e-05	0.00140847
TLR3	1.12048	1.47981	7.93593	0.00484627	0.0314851
RN7SL689P	1.12122	2.22236	13.8218	0.000200987	0.00252339
GPAT3	1.1215	4.27295	19.6641	9.23e-06	0.000191314
C9orf116	1.12195	1.75104	7.47413	0.00625917	0.0380551
C2CD2	1.12255	3.14394	22.6149	1.98e-06	5.12e-05
C19orf25	1.12491	2.37331	13.3878	0.000253267	0.00307224
CNN1	1.12607	3.78745	20.268	6.73e-06	0.000148275
ACAP3	1.12675	1.3886	8.97813	0.0027323	0.0203283
AC008443.5	1.1282	2.41221	15.3009	9.17e-05	0.00133186
IQCB1	1.13402	4.20404	28.3341	1.02e-07	3.83e-06
ABHD11	1.13457	2.80327	19.7671	8.75e-06	0.000183293
CES2	1.13465	4.31182	40.0009	2.54e-10	1.77e-08
NEBL	1.13897	3.03508	22.3747	2.24e-06	5.75e-05
AC079922.2	1.13971	1.62919	8.54969	0.0034558	0.0242954
PICSAR	1.13971	3.74104	23.9857	9.71e-07	2.84e-05
NPAS2	1.1399	2.75705	13.5531	0.000231904	0.00283824
AL365203.2	1.13992	2.81706	16.1588	5.82e-05	0.000906549
PLEKHG5	1.1406	2.07146	12.7878	0.000348896	0.00394038
CSRP3	1.14089	1.22724	7.81622	0.00517794	0.0331179
PCDHB2	1.14164	2.73211	10.5366	0.00117035	0.0105018
PERP	1.14174	5.95323	47.3962	5.8e-12	5.79e-10
AF274855.1	1.14377	1.99653	13.0441	0.000304243	0.0035671
MARCH4	1.14467	1.88008	12.2614	0.000462417	0.00496562
AC097478.1	1.14542	2.86855	16.0551	6.15e-05	0.000949747
CROT	1.14723	3.13021	24.2371	8.52e-07	2.55e-05
PRPF18	1.14797	4.25017	37.336	9.94e-10	6.06e-08
DLX4	1.1491	3.22271	16.0298	6.24e-05	0.000959568
MT.TL2	1.1496	1.69513	7.76548	0.00532541	0.0337396
NA..4455	1.15224	4.11021	34.8689	3.53e-09	1.88e-07
PDLIM1	1.15442	4.29636	17.2231	3.32e-05	0.000566446
DHRS3	1.15553	1.41941	6.88281	0.00870289	0.0488152
KCNK6	1.15639	2.40614	16.2892	5.44e-05	0.000857806
LCAT	1.15651	2.05897	10.9792	0.000921385	0.0086114
[truncated: 430 more rows]

## Sheet: DE - U2OS CPT v. DMSO
Gene name	logFoldChange	logCountsPerMillion	LR	PValue	FDR
PRND	-8.24598	2.0883	168.299	1.74063e-38	1.68265e-36
LEFTY1	-6.94322	0.972252	54.6784	1.41955e-13	2.61869e-12
HMGB3P18	-6.52875	0.645383	53.3545	2.78475e-13	4.97081e-12
KLK7	-6.27128	0.458719	42.8373	5.94881e-11	7.96403e-10
MYOCD	-6.17582	3.74433	323.084	3.08349e-72	9.36815e-70
SOSTDC1	-5.94852	3.0253	270.021	1.12265e-60	2.42217e-58
RGCC	-5.93933	0.219569	35.6411	2.37229e-09	2.56101e-08
EDN3	-5.79928	0.12725	34.6236	4.00022e-09	4.1634e-08
HMGCS2	-5.7139	0.0666609	30.2643	3.77e-08	3.38096e-07
MAP2K6	-5.64235	2.74374	207.847	4.05084e-47	5.68913e-45
AL122125.1	-5.54659	-0.0357252	28.4088	9.82157e-08	8.22349e-07
AC002546.1	-5.48521	-0.0723484	27.7521	1.379e-07	1.13233e-06
SYNGR4	-5.3609	-0.1464	25.2289	5.09139e-07	3.79928e-06
CCKAR	-5.35684	-0.146866	24.3761	7.9246e-07	5.72409e-06
PLP1	-5.23376	2.37018	148.862	3.07381e-34	2.32283e-32
HIST1H2AJ	-4.88107	0.689889	45.211	1.76911e-11	2.54215e-10
FAM198A	-4.78526	1.66177	90.5404	1.8124e-21	6.26013e-20
HIST1H1A	-4.77941	3.63747	275.107	8.74874e-62	1.94392e-59
PI15	-4.69631	0.557872	45.1745	1.80235e-11	2.58493e-10
CXCL14	-4.54445	9.17481	660.981	9.13917e-146	2.7211e-142
SMOC1	-4.44978	5.32247	465.227	3.50339e-103	3.06794e-100
MANSC4	-4.40378	0.92271	45.6967	1.38057e-11	2.0041e-10
CRYBA4	-4.38402	0.353213	28.0596	1.17639e-07	9.75103e-07
LEFTY2	-4.33647	0.304039	32.2903	1.32772e-08	1.27514e-07
SLC25A48	-4.1989	3.02832	173.383	1.34983e-39	1.39155e-37
BMF	-4.16659	2.8953	163.938	1.56058e-37	1.4253e-35
ITGB3	-4.08319	2.60609	140.896	1.69564e-32	1.16327e-30
SOX2	-4.08122	6.00886	591.763	1.03635e-130	1.71424e-127
C6orf15	-4.02537	3.34088	154.096	2.20692e-35	1.77592e-33
SULF1	-3.9713	1.54612	73.7007	9.09063e-18	2.40805e-16
AF001548.2	-3.97105	0.0656292	24.1137	9.08135e-07	6.49971e-06
LAMA4	-3.94666	2.88508	167.097	3.18648e-38	3.00235e-36
EPHA5	-3.93037	2.21769	115.662	5.63652e-27	2.80639e-25
COLGALT2	-3.77854	1.78121	91.02	1.42224e-21	4.94694e-20
MYB	-3.75948	1.12528	53.351	2.7897e-13	4.97369e-12
HIST2H2AB	-3.75804	0.829433	47.8988	4.4879e-12	6.95952e-11
RNF43	-3.72662	5.06888	416.497	1.41205e-92	7.78565e-90
SLC32A1	-3.70747	-0.105426	15.9057	6.65788e-05	0.000325183
DRD1	-3.6897	3.79113	252.6	7.04217e-57	1.29428e-54
KRT14	-3.68049	-0.107485	19.2153	1.16774e-05	6.76162e-05
FGF9	-3.66428	2.24134	108.605	1.98082e-25	8.82887e-24
HLF	-3.63707	1.02846	47.7256	4.90243e-12	7.56295e-11
FOXS1	-3.61701	-0.144312	17.9032	2.32426e-05	0.000125731
HOXA10.AS	-3.616	-0.145059	18.0714	2.12774e-05	0.000115943
KANK4	-3.61054	-0.146383	17.4392	2.96651e-05	0.000156438
NTRK3	-3.60736	2.90284	172.63	1.97104e-39	2.00979e-37
SOCS1	-3.5988	2.0539	61.4059	4.64416e-15	9.7652e-14
MIAT	-3.55656	2.9255	155.609	1.03055e-35	8.42958e-34
KIF26B	-3.51892	0.941198	38.0972	6.73081e-10	7.93362e-09
FAM131B	-3.50142	0.936828	39.3394	3.56184e-10	4.34632e-09
PCSK2	-3.48365	-0.221504	14.5338	0.00013767	0.000621436
PTP4A3	-3.47209	2.08154	98.7136	2.91786e-23	1.12243e-21
IGSF10	-3.46272	3.70301	257.119	7.28815e-58	1.35623e-55
YPEL1	-3.44999	1.94476	88.5604	4.93056e-21	1.66066e-19
AC012368.1	-3.44539	1.81504	75.6835	3.32986e-18	9.01302e-17
GNG2	-3.43538	1.32393	61.9264	3.56535e-15	7.55012e-14
GPR55	-3.39675	0.21741	21.7266	3.144e-06	2.03499e-05
KCNK10	-3.34989	1.85854	75.5149	3.62659e-18	9.76295e-17
SEMA3A	-3.32528	5.6229	430.629	1.18589e-95	7.35598e-93
KIAA1210	-3.31971	-0.304587	12.1837	0.000482102	0.00190474
OXGR1	-3.31842	1.39466	41.3757	1.25608e-10	1.62038e-09
PRELP	-3.31461	0.160031	22.7853	1.81147e-06	1.22031e-05
LSAMP	-3.30618	1.22532	44.9832	1.98732e-11	2.81497e-10
PRSS33	-3.29822	1.02203	35.8683	2.11116e-09	2.30417e-08
HIST1H4H	-3.29744	2.31655	68.2827	1.41657e-16	3.42346e-15
CD200	-3.29008	2.82116	151.638	7.60192e-35	5.98782e-33
FRMD6.AS1	-3.23768	2.27803	103.365	2.78724e-24	1.1337e-22
MYCN	-3.201	2.14733	65.9094	4.72141e-16	1.08636e-14
SHISA3	-3.19334	1.85113	81.3761	1.86601e-19	5.58939e-18
PHLDA1	-3.1433	5.77811	395.692	4.77287e-88	2.45013e-85
PPP1R1A	-3.0879	1.05782	39.2655	3.69922e-10	4.50657e-09
RGS16	-3.06776	4.69629	263.123	3.57896e-59	7.104e-57
HIST1H2BF	-3.06155	0.832837	27.0506	1.98204e-07	1.58552e-06
NA..362	-3.04605	0.331676	23.8863	1.02197e-06	7.23793e-06
LINC00461	-3.00238	0.993706	41.9348	9.43674e-11	1.24103e-09
AL096865.1	-2.99585	-0.0331681	15.7878	7.08594e-05	0.000344171
ROR1	-2.9956	6.44414	467.345	1.212e-103	1.12769e-100
KCNJ4	-2.97125	1.14077	41.7843	1.01918e-10	1.33275e-09
FREM2	-2.96736	2.66133	103.365	2.78692e-24	1.1337e-22
RASL11B	-2.89737	2.42309	87.1253	1.01861e-20	3.38483e-19
SOX5	-2.89221	3.83618	202.959	4.72281e-46	6.22199e-44
LINC01623	-2.89201	0.714395	25.7741	3.83813e-07	2.9182e-06
PRICKLE1	-2.87759	4.87187	315.567	1.33852e-70	3.6901e-68
NA..2579	-2.8716	1.35445	50.2771	1.33501e-12	2.19363e-11
FCHO1	-2.86347	-0.106017	13.6684	0.000218089	0.000940527
LINC02487	-2.85979	-0.106644	14.3264	0.000153691	0.000686467
DMC1	-2.85765	-0.108719	14.1492	0.000168866	0.000747299
HIST1H4C	-2.82112	6.3597	262.301	5.40629e-59	1.05899e-56
TCIM	-2.80303	1.64157	53.1394	3.107e-13	5.50642e-12
PDE3A	-2.7918	0.164338	15.7609	7.18723e-05	0.000348295
TOX3	-2.78392	1.73037	54.6321	1.45343e-13	2.67126e-12
LRIG3	-2.78301	4.02747	169.76	8.34918e-39	8.17726e-37
VAT1L	-2.77534	1.51859	51.6762	6.54501e-13	1.11355e-11
LEMD1	-2.76177	0.412526	22.7852	1.81158e-06	1.22031e-05
TRIL	-2.7549	2.24907	82.6552	9.76926e-20	3.0236e-18
FXYD6	-2.75341	4.5647	169.776	8.2822e-39	8.16537e-37
X7SK	-2.74272	1.49139	40.732	1.746e-10	2.20464e-09
CRYBG1	-2.73779	2.10236	74.8523	5.07292e-18	1.35828e-16
C2orf48	-2.73217	1.60036	43.2214	4.88838e-11	6.62177e-10
IMPA2	-2.72521	3.20741	151.578	7.83659e-35	6.14018e-33
CDK15	-2.72344	1.10935	40.1814	2.31447e-10	2.88814e-09
AL356804.1	-2.71598	1.10327	35.4659	2.59557e-09	2.79596e-08
CLEC7A	-2.69242	1.65016	42.5145	7.01611e-11	9.33413e-10
PARM1	-2.69112	4.71107	302.32	1.02855e-67	2.64e-65
PRR36	-2.68715	0.580654	25.7084	3.97093e-07	3.00994e-06
SLC2A12	-2.68484	6.80986	392.286	2.63169e-87	1.26381e-84
JAKMIP2	-2.68479	4.66527	224.622	8.87681e-51	1.40584e-48
ABCG1	-2.67837	3.06972	132.763	1.01883e-30	6.37283e-29
DHRS2	-2.67701	9.05537	260.33	1.45377e-58	2.77465e-56
NA..823	-2.66281	0.0972365	15.0032	0.000107329	0.000496522
IGFBP5	-2.64892	8.032	364.598	2.80822e-81	1.19445e-78
DYNC1I1	-2.64414	3.27081	101.573	6.88906e-24	2.74953e-22
PDE4B	-2.64105	1.41933	36.82	1.29553e-09	1.46554e-08
SSTR2	-2.63031	3.89926	188.205	7.83737e-43	9.04457e-41
GPRIN3	-2.62146	0.715817	23.9956	9.65584e-07	6.87782e-06
NELL1	-2.6178	1.50358	50.6234	1.11901e-12	1.84892e-11
DKK2	-2.61059	1.77187	52.3389	4.67034e-13	8.09399e-12
EHF	-2.61035	0.532746	21.8595	2.93368e-06	1.90881e-05
ADAMTSL2	-2.60067	0.0632015	13.8031	0.000203002	0.000881076
BMP6	-2.57605	0.99412	23.0697	1.56235e-06	1.06447e-05
MUC15	-2.56729	3.10635	132.948	9.28142e-31	5.83006e-29
GJA1	-2.56171	5.86461	311.511	1.02337e-69	2.72051e-67
CRYBB1	-2.55716	0.0337791	13.7626	0.000207428	0.000898715
TTYH1	-2.55618	4.56392	205.973	1.03854e-46	1.41842e-44
NGFR	-2.55557	3.0026	100.777	1.02948e-23	4.03311e-22
HIST1H1E	-2.55326	2.60415	64.2466	1.09781e-15	2.45024e-14
RNU4.2	-2.54414	0.276235	17.2197	3.32973e-05	0.000173199
AC005225.5	-2.54173	0.275535	17.0259	3.6873e-05	0.00019027
KIAA0319	-2.54149	0.830434	27.6026	1.48975e-07	1.2179e-06
APC2	-2.54032	0.829387	29.1353	6.74968e-08	5.79818e-07
TPPP	-2.53608	1.22781	35.7238	2.27366e-09	2.46706e-08
MAML3	-2.53513	1.22627	38.7737	4.75892e-10	5.72725e-09
SOCS3	-2.49366	3.3477	93.2224	4.67371e-22	1.67254e-20
SYT4	-2.4916	-0.00161717	12.7812	0.000350127	0.00143314
MN1	-2.48173	4.96675	257.531	5.92634e-58	1.11678e-55
BHLHE41	-2.48036	5.51775	237.887	1.1363e-53	1.92228e-51
MYCL	-2.47727	2.7171	93.4239	4.22128e-22	1.51793e-20
USP24P1	-2.47675	1.50024	35.9835	1.98993e-09	2.18627e-08
AC079834.2	-2.46673	0.438385	17.9661	2.24872e-05	0.000122044
ZDHHC22	-2.46187	0.4372	16.2101	5.66902e-05	0.00028141
COLEC12	-2.44386	1.79704	52.0934	5.29219e-13	9.11861e-12
ZNF385B	-2.43751	1.93232	63.0727	1.99216e-15	4.34857e-14
AC011700.1	-2.42983	-0.0361788	12.0277	0.00052415	0.00205235
GPR146	-2.41683	1.1379	25.6997	3.98899e-07	3.02055e-06
AL121845.1	-2.41246	0.216582	9.75553	0.00178784	0.00609275
LINC01632	-2.39961	0.189855	14.3728	0.000149954	0.000671791
AC239800.2	-2.39562	0.730478	23.8509	1.04096e-06	7.35838e-06
ATP1B2	-2.37715	1.42023	41.627	1.10457e-10	1.43114e-09
GPM6B	-2.36692	1.31693	35.1967	2.98028e-09	3.18503e-08
CCKBR	-2.35778	2.22361	68.9529	1.00843e-16	2.4651e-15
PRDM1	-2.35621	3.21827	110.461	7.76525e-26	3.5901e-24
NA..3529	-2.33919	1.56257	43.953	3.3636e-11	4.64508e-10
AP000560.1	-2.33804	0.35814	16.2848	5.44995e-05	0.000271622
PLCXD1	-2.32758	3.77444	153.191	3.47949e-35	2.77001e-33
SHISA2	-2.32413	2.14311	56.1214	6.81326e-14	1.29705e-12
H1F0	-2.3175	6.56832	272.168	3.82387e-61	8.37146e-59
ITGA11	-2.31085	1.37423	32.8096	1.01644e-08	9.96165e-08
ABCB5	-2.31015	0.132817	12.805	0.000345689	0.00141693
PCDH18	-2.30689	2.45048	47.4179	5.73569e-12	8.7308e-11
PDK4	-2.30538	1.27148	36.5338	1.50041e-09	1.68451e-08
LINC01037	-2.30354	0.512839	19.5029	1.00445e-05	5.88479e-05
SLC24A4	-2.30166	0.333746	16.7239	4.32331e-05	0.000220793
NA..3475	-2.30112	0.668793	20.1421	7.18979e-06	4.34041e-05
DACH1	-2.29246	1.04743	26.4409	2.71731e-07	2.13696e-06
PTCH1	-2.28776	3.75745	125.967	3.12649e-29	1.76303e-27
SPSB4	-2.28516	1.15508	28.8064	7.99859e-08	6.76947e-07
NA..2533	-2.28126	1.87858	47.3288	6.00238e-12	9.1181e-11
ENHO	-2.25914	1.86069	49.1807	2.33432e-12	3.74877e-11
FNDC1	-2.25359	0.0993403	11.5336	0.000683486	0.00259899
RASSF2	-2.24502	3.91389	155.084	1.3426e-35	1.0922e-33
PCIF1	-2.2372	0.625974	20.6541	5.50196e-06	3.41709e-05
CX3CL1	-2.22372	1.94816	44.4263	2.64118e-11	3.70238e-10
RIMKLA	-2.22177	1.31282	23.4871	1.25754e-06	8.71552e-06
AC084036.1	-2.22088	0.461516	13.9906	0.00018373	0.000805373
ERBB3	-2.21752	2.47425	64.7047	8.70055e-16	1.9625e-14
AL021453.1	-2.21568	0.752656	22.5972	1.99774e-06	1.33681e-05
HSD11B2	-2.21504	0.280602	14.345	0.000152184	0.000680757
AC015849.5	-2.2093	0.278884	14.2928	0.000156463	0.000696968
AC113410.3	-2.19467	0.276343	12.4438	0.000419389	0.0016788
ZNF467	-2.19449	1.45829	39.2022	3.82106e-10	4.6512e-09
TRIB2	-2.19124	5.50702	215.868	7.20468e-49	1.07256e-46
TMEM130	-2.1852	0.0658925	11.807	0.000590099	0.00227763
TMEM80	-2.18113	1.97893	51.2948	7.94863e-13	1.33406e-11
SNORD46	-2.16947	0.583391	17.4637	2.92844e-05	0.000154704
GRIN2A	-2.1673	0.711917	12.4236	0.000423941	0.00169565
CD34	-2.16708	1.27179	28.8651	7.76003e-08	6.58629e-07
CXXC4	-2.16136	3.35958	109.533	1.24037e-25	5.6126e-24
IFIT1	-2.15773	1.78471	47.2841	6.14073e-12	9.30927e-11
RNF217	-2.1556	5.94459	277.252	2.98189e-62	6.82943e-60
NA..330	-2.15282	2.2503	52.6867	3.91233e-13	6.828e-12
TEF	-2.14418	2.0042	51.5975	6.81274e-13	1.15382e-11
PRTG	-2.14151	2.24642	52.5683	4.15547e-13	7.24386e-12
SERTM1	-2.13834	0.0359048	10.2203	0.00138906	0.0048817
AC099568.2	-2.13667	0.0363815	10.1669	0.00142983	0.00500491
CLVS2	-2.13206	0.559559	18.2738	1.91321e-05	0.000105606
SLITRK2	-2.11803	1.04399	21.4332	3.66376e-06	2.34188e-05
C3	-2.11355	0.221257	12.5902	0.000387771	0.00156826
AC092687.3	-2.11196	1.22885	28.3247	1.02577e-07	8.55977e-07
SERPINF1	-2.11019	3.60324	104.203	1.82602e-24	7.57212e-23
PDGFB	-2.10963	4.0473	69.8103	6.52908e-17	1.62268e-15
CAHM	-2.10008	0.387471	14.7372	0.000123583	0.000563488
SLC25A41	-2.09804	0.218821	10.1006	0.00148219	0.00515426
GLRB	-2.09419	4.57011	108.511	2.07702e-25	9.20258e-24
LNP1	-2.08365	3.23818	86.8462	1.17295e-20	3.87178e-19
RSPO3	-2.083	1.12225	23.1737	1.4801e-06	1.01214e-05
ART5	-2.08003	2.74865	30.8167	2.83592e-08	2.59645e-07
HLA.DMB	-2.07987	-0.219418	7.64078	0.00570632	0.0167389
HIST2H2AC	-2.07647	2.10634	47.0576	6.89306e-12	1.03863e-10
CYYR1	-2.07156	1.51801	34.9065	3.45918e-09	3.64451e-08
SGSM1	-2.0649	1.71711	39.3092	3.6173e-10	4.41038e-09
HMGB1P1	-2.06163	-0.000209485	9.47273	0.00208549	0.00697365
AC007370.1	-2.05872	-0.223025	6.8636	0.00879693	0.0241726
WNT11	-2.05779	1.18802	25.7067	3.97454e-07	3.01114e-06
METTL7A	-2.05184	1.76822	41.7833	1.01969e-10	1.33275e-09
CCDC175	-2.05121	1.35615	22.5094	2.09116e-06	1.39538e-05
CITED1	-2.0492	1.57379	36.7331	1.35462e-09	1.52891e-08
LPL	-2.04861	3.94757	146.103	1.23244e-33	9.08287e-32
FZD7	-2.04566	5.30447	136.368	1.65805e-31	1.08261e-29
SLITRK3	-2.04488	0.771921	15.1508	9.9258e-05	0.000463505
AC245884.9	-2.04014	0.356691	10.6792	0.00108345	0.0039149
NKD1	-2.02468	3.17096	95.9079	1.20354e-22	4.50178e-21
ADGRL3	-2.02327	5.41696	205.927	1.06282e-46	1.43838e-44
MSC.AS1	-2.01987	0.626071	17.1185	3.51177e-05	0.000181779
AL356489.2	-2.01913	1.48236	33.0951	8.77579e-09	8.66922e-08
AL662890.2	-2.01297	0.48646	14.6744	0.000127771	0.000580269
CRTC1	-2.01149	0.974283	16.8623	4.01915e-05	0.000206179
NA..179	-2.01088	3.20402	85.2567	2.62036e-20	8.48028e-19
ETV1	-2.00904	1.73623	38.6732	5.01033e-10	6.00071e-09
LINC02367	-2.00822	0.162382	10.8392	0.000993762	0.00361626
DBP	-2.0051	3.21911	85.0421	2.9208e-20	9.39134e-19
AC027601.4	-2.00424	0.959768	21.3632	3.79996e-06	2.42374e-05
KCTD12	-2.0016	3.08415	80.4856	2.92834e-19	8.61544e-18
SAPCD2	-1.99685	4.45371	142.083	9.3267e-33	6.48816e-31
ZNF503.AS2	-1.99531	1.31625	31.0333	2.53637e-08	2.33882e-07
SOX2.OT	-1.99309	1.14208	21.4371	3.65628e-06	2.3381e-05
H1FX.AS1	-1.99089	-0.0362561	8.6659	0.00324219	0.0102804
SPOCK3	-1.98794	0.465277	12.8041	0.000345853	0.00141721
MXD3	-1.98756	3.18134	74.9536	4.81912e-18	1.29265e-16
SP8	-1.98744	0.605524	16.3354	5.30647e-05	0.000265092
CYP4F22	-1.9866	-0.0356939	8.22508	0.00413155	0.0126948
TMEM151B	-1.9853	0.60439	16.8832	3.97518e-05	0.000204205
COL14A1	-1.98323	0.309732	11.2284	0.000805551	0.00300557
FZD10	-1.98258	-0.26268	6.89163	0.00866003	0.0238568
MTSS1	-1.98068	1.83006	38.0644	6.84474e-10	8.05515e-09
AC012645.1	-1.97208	-0.264488	6.67695	0.00976678	0.0264264
RALGPS1	-1.96777	1.44515	26.0817	3.27267e-07	2.52306e-06
AC004835.1	-1.95973	0.929341	19.0075	1.30205e-05	7.47246e-05
ARSJ	-1.95913	4.38678	124.013	8.36968e-29	4.58086e-27
MAPT	-1.95839	2.88136	77.2071	1.53941e-18	4.29967e-17
SKIDA1	-1.94785	1.36511	24.9449	5.89927e-07	4.35627e-06
TCF4	-1.94591	7.03028	224.772	8.23115e-51	1.3176e-48
ITGA9	-1.94539	0.816034	17.4583	2.93678e-05	0.00015509
CDH6	-1.94495	0.922383	18.9678	1.32946e-05	7.60633e-05
CCDC106	-1.93555	1.01519	20.5396	5.84105e-06	3.61019e-05
HCFC1R1	-1.93553	5.8009	145.52	1.65311e-33	1.21231e-31
ARHGAP28	-1.92754	3.95438	124.319	7.17315e-29	3.94047e-27
NA..4342	-1.9192	0.278672	11.6443	0.000643987	0.00246517
RADIL	-1.91909	0.279186	12.0399	0.000520738	0.00204113
VASH2	-1.91707	2.40014	45.8983	1.24556e-11	1.81969e-10
NA..291	-1.91577	2.73902	67.3209	2.30727e-16	5.46947e-15
GPSM2	-1.90845	5.03385	190.613	2.33625e-43	2.73856e-41
NOTUM	-1.9079	3.32105	76.8844	1.8126e-18	5.02499e-17
CHI3L1	-1.9061	1.25689	22.6224	1.97168e-06	1.32099e-05
FAM19A5	-1.90137	5.84491	200.173	1.91438e-45	2.43585e-43
MIMT1	-1.89691	0.100243	9.67591	0.001867	0.00632833
HIST1H2BK	-1.89531	0.981941	17.8301	2.41538e-05	0.000130093
CALML4	-1.89504	0.887784	19.1182	1.22869e-05	7.08422e-05
SLC7A11	-1.88949	5.72822	168.804	1.35e-38	1.31356e-36
OSBPL10	-1.88811	6.74788	171.298	3.85198e-39	3.90098e-37
GCNT1	-1.87631	4.11247	134.801	3.64996e-31	2.33206e-29
PCDHB17P	-1.87554	0.651199	13.1198	0.000292185	0.00122287
STC1	-1.87344	3.93627	123.185	1.27066e-28	6.87865e-27
ANG	-1.86814	1.44425	26.9124	2.12886e-07	1.69387e-06
ACAN	-1.86751	1.69158	29.5226	5.52696e-08	4.80607e-07
OPRK1	-1.8663	0.8705	19.9226	8.06421e-06	4.80977e-05
THEM6	-1.86407	3.05438	51.3477	7.73734e-13	1.30301e-11
PMP22	-1.86336	5.61196	183.704	7.5274e-42	8.36272e-40
NR1D1	-1.85832	2.42667	45.9442	1.21669e-11	1.77925e-10
GPER1	-1.8581	2.0397	32.2486	1.35657e-08	1.29957e-07
NTRK2	-1.85519	2.35013	37.8037	7.82316e-10	9.12008e-09
THOC6	-1.85404	1.61616	18.3209	1.86652e-05	0.000103412
C18orf15	-1.85166	0.38746	12.0148	0.000527801	0.00206393
MIR181A2HG	-1.84907	0.386011	10.5993	0.0011313	0.00406902
NRTN	-1.84399	0.386019	11.1969	0.000819325	0.00304704
FOS	-1.84317	1.27661	18.0812	2.11677e-05	0.000115472
AC007608.4	-1.84284	1.12832	21.6079	3.3447e-06	2.15552e-05
H1FX	-1.83707	6.00934	116.479	3.73332e-27	1.89041e-25
WNT4	-1.83602	0.851128	16.7664	4.22762e-05	0.000216203
NLGN1	-1.83088	1.20274	25.4198	4.61163e-07	3.46035e-06
RAB42	-1.82568	0.224408	9.87784	0.00167281	0.00573938
BCL2L11	-1.82285	4.19445	91.2272	1.28087e-21	4.46563e-20
GALNT17	-1.82257	2.77556	59.2112	1.41625e-14	2.87245e-13
AL035252.3	-1.81886	0.220763	9.43947	0.00212365	0.00708694
RCOR2	-1.80974	0.835428	17.433	2.97618e-05	0.000156837
STARD8	-1.80325	2.34911	43.3184	4.65187e-11	6.30714e-10
HR	-1.80168	3.59968	82.2652	1.19002e-19	3.64522e-18
NFIA	-1.8011	6.23349	182.727	1.23047e-41	1.35689e-39
NCAM1	-1.79871	6.31557	156.547	6.42746e-36	5.3756e-34
MCM6	-1.79866	4.97713	167.786	2.2528e-38	2.14984e-36
LINC00052	-1.79583	1.02551	14.6501	0.000129429	0.000587265
AC097534.2	-1.79158	1.09607	21.7811	3.05589e-06	1.98313e-05
SAMD11	-1.78972	3.50721	82.611	9.9899e-20	3.08547e-18
RAPGEF5	-1.78886	2.26386	37.3318	9.96475e-10	1.14729e-08
ARRDC3	-1.78729	2.7512	51.9386	5.72634e-13	9.82121e-12
PHF24	-1.77621	-0.143716	6.50784	0.01074	0.0287152
TMTC1	-1.77572	3.63187	99.7935	1.69144e-23	6.54039e-22
ZNF395	-1.77145	3.61345	76.701	1.98901e-18	5.50379e-17
LGR5	-1.77029	0.584086	7.09902	0.0077126	0.0216188
RHBDL3	-1.76826	1.07988	20.6739	5.4452e-06	3.38466e-05
AC104971.2	-1.76519	1.31275	19.913	8.1048e-06	4.83011e-05
FLRT1	-1.76493	0.191946	9.70152	0.00184116	0.00625355
TSC22D1	-1.76305	5.43404	136.614	1.46491e-31	9.64962e-30
E2F2	-1.76071	2.72962	58.7516	1.78888e-14	3.60366e-13
NEK2P4	-1.74507	0.89057	17.1003	3.54565e-05	0.000183278
HIST1H1C	-1.74131	7.19232	191.635	1.39766e-43	1.65135e-41
NPL	-1.73408	1.89937	29.1808	6.59292e-08	5.67662e-07
LMCD1.AS1	-1.7303	1.2134	19.0231	1.29146e-05	7.42029e-05
ASB13	-1.72341	1.04873	17.1802	3.39965e-05	0.000176343
RFESD	-1.72303	0.309533	9.32623	0.00225897	0.00747769
MFSD13A	-1.72176	1.9794	30.7183	2.98337e-08	2.72141e-07
LHX4	-1.72132	0.963502	16.6138	4.58162e-05	0.000232946
FUT9	-1.72104	1.53337	26.7353	2.33317e-07	1.84657e-06
GLI1	-1.7188	3.71804	89.5829	2.9405e-21	1.00402e-19
TCHH	-1.71617	0.560811	12.6569	0.000374173	0.00152486
CYS1	-1.71596	1.89149	28.6409	8.71202e-08	7.34821e-07
AC023301.1	-1.71586	0.672153	14.462	0.000143016	0.000643593
AC108047.1	-1.71554	0.163345	8.59165	0.00337707	0.0106423
PROX1	-1.71537	2.34864	43.9387	3.38826e-11	4.6748e-10
TMEM169	-1.7132	0.440491	9.33892	0.00224338	0.00743317
USP18	-1.71314	0.439125	10.8851	0.000969418	0.00353805
PHF2P2	-1.71191	0.164316	8.21986	0.00414345	0.0127235
FOXP1	-1.71	6.48506	202.08	7.3444e-46	9.50748e-44
UBOX5	-1.70525	0.439006	10.2386	0.00137529	0.00484398
RNU6.789P	-1.70388	0.161089	7.53453	0.00605276	0.0175238
MNS1	-1.70254	5.49336	67.4241	2.18954e-16	5.20698e-15
ARHGEF39	-1.70107	3.08707	60.5628	7.12674e-15	1.48179e-13
LMO3	-1.70018	-0.182184	5.89133	0.0152156	0.0386347
AC107308.1	-1.69714	0.770201	9.48796	0.00206824	0.00691909
RNU6.762P	-1.69693	-0.18328	5.86272	0.0154648	0.0391606
FAM110D	-1.69684	1.25758	20.3149	6.56876e-06	4.00119e-05
AL355482.1	-1.69553	-0.182637	5.59314	0.0180309	0.0444883
FAM222A	-1.69139	2.54618	39.401	3.4512e-10	4.22169e-09
LRRC75A	-1.69075	1.39394	20.3524	6.44107e-06	3.93307e-05
ROPN1B	-1.69025	0.945125	15.4531	8.45779e-05	0.000403303
PCDHB12	-1.68497	0.850727	15.7441	7.2515e-05	0.000351049
ITGB8	-1.68405	5.65433	151.12	9.86707e-35	7.69064e-33
PCDHB5	-1.68076	3.57032	73.1147	1.2233e-17	3.21753e-16
BMP4	-1.67839	8.05247	104.905	1.2813e-24	5.35806e-23
TFAP4	-1.67742	2.78296	39.3761	3.49542e-10	4.26877e-09
NA..116	-1.67513	2.8626	49.448	2.037e-12	3.27837e-11
ANKRD20A8P	-1.67431	5.06068	104.161	1.86508e-24	7.71263e-23
COX20P1	-1.67318	1.37777	20.4117	6.24471e-06	3.82729e-05
TMEM176A	-1.6724	1.17142	19.925	8.05412e-06	4.80568e-05
ZNF204P	-1.67153	1.2432	19.9684	7.87325e-06	4.7053e-05
CROCC	-1.66086	1.75722	29.3512	6.03799e-08	5.2321e-07
DNM3OS	-1.65602	2.72913	53.5932	2.46615e-13	4.42866e-12
PELI2	-1.65447	2.23512	35.0362	3.23627e-09	3.44377e-08
GUCY1A2	-1.65375	4.57118	125.127	4.77514e-29	2.64266e-27
PALM3	-1.65326	3.40121	52.7259	3.83495e-13	6.71658e-12
KLF12	-1.65268	3.05132	65.1962	6.78001e-16	1.54333e-14
AMOT	-1.65225	4.43868	120.215	5.6765e-28	2.94446e-26
PC	-1.65063	0.732945	13.9349	0.000189252	0.000826943
CDKN1B	-1.6471	4.09844	93.8943	3.32838e-22	1.21445e-20
IL22RA1	-1.64459	0.999038	15.9403	6.53719e-05	0.000320023
PRR16	-1.64224	2.19366	29.1422	6.72571e-08	5.78093e-07
AC073464.1	-1.63803	3.27331	47.0417	6.94908e-12	1.04496e-10
WDR76	-1.63659	4.48157	122.752	1.58025e-28	8.49282e-27
AL645608.1	-1.63292	-0.0355203	6.45204	0.0110825	0.0294301
LMCD1	-1.63163	4.93625	143.979	3.59129e-33	2.60798e-31
AFF2	-1.63081	1.82751	30.8914	2.72878e-08	2.50453e-07
PCDHGA1	-1.63026	0.388507	8.955	0.0027671	0.00893965
SP6	-1.62616	0.608205	9.29448	0.00229845	0.00759535
SGK1	-1.62586	4.53468	95.0651	1.84226e-22	6.78856e-21
GPR162	-1.62553	2.3822	32.9723	9.34803e-09	9.1979e-08
BCAT1	-1.62475	6.75983	189.872	3.39084e-43	3.94371e-41
NEDD9	-1.62467	5.53237	163.135	2.33752e-37	2.12187e-35
CNTN3	-1.6242	1.52024	23.849	1.04194e-06	7.36183e-06
FUT11	-1.61982	5.6615	155.787	9.42211e-36	7.79261e-34
ACVR2B	-1.61794	4.77572	81.9825	1.37294e-19	4.1712e-18
PCDHB9	-1.61644	1.67373	27.4738	1.59237e-07	1.2961e-06
AL691432.2	-1.61532	0.978979	15.5885	7.8733e-05	0.000378341
PRRX1	-1.61454	2.81801	38.8973	4.46708e-10	5.39346e-09
GABRB2	-1.61451	0.980361	16.6215	4.56313e-05	0.000232085
RGS17	-1.61447	2.40538	34.7083	3.83004e-09	4.00406e-08
SLC6A9	-1.61409	2.61371	33.3759	7.59597e-09	7.56903e-08
TLL1	-1.61273	2.83826	29.6626	5.14166e-08	4.49993e-07
LINC01608	-1.60785	2.64726	45.0711	1.90012e-11	2.70431e-10
SEMA3D	-1.60774	0.976455	13.7744	0.000206123	0.000894102
PER3	-1.60733	4.07939	93.7504	3.57934e-22	1.29965e-20
ZNF703	-1.60679	4.94411	111.998	3.57671e-26	1.69575e-24
NPY1R	-1.60449	1.12681	18.1578	2.03339e-05	0.000111537
PEG10	-1.60446	2.97215	38.5372	5.37199e-10	6.41836e-09
TRPS1	-1.60197	5.6064	139.617	3.22769e-32	2.16444e-30
SSPN	-1.60184	4.37231	92.6559	6.22243e-22	2.1951e-20
KBTBD7	-1.60022	3.59452	80.7308	2.5866e-19	7.65542e-18
TEK	-1.59847	1.89139	29.9139	4.51671e-08	3.9871e-07
PLXNC1	-1.59771	3.29182	62.4505	2.73229e-15	5.8526e-14
DPP10	-1.59733	1.44759	23.2578	1.41674e-06	9.71038e-06
ADGRV1	-1.59553	1.88582	23.8997	1.0149e-06	7.19466e-06
AP003469.4	-1.59402	0.489623	10.9679	0.000927029	0.00339584
ANKH	-1.59388	3.58649	62.9651	2.104e-15	4.58598e-14
CCM2L	-1.59332	0.488485	10.4184	0.00124766	0.00443821
AC069503.1	-1.59213	0.794635	13.0921	0.000296544	0.00123833
ZNF503	-1.59055	6.6579	165.442	7.32486e-38	6.81533e-36
GRB7	-1.58948	0.0986152	6.76372	0.00930298	0.0253234
LINC01970	-1.58884	1.55347	24.1666	8.83524e-07	6.32965e-06
SOX6	-1.58608	3.70749	72.5776	1.60593e-17	4.17233e-16
ETV2	-1.58546	0.0985085	6.87791	0.00872676	0.0240184
POTEC	-1.58297	1.56305	16.237	5.58921e-05	0.000277911
MTND2P32	-1.57974	0.363552	9.26207	0.00233948	0.0077087
ATP8A1	-1.57673	3.77888	63.8722	1.3276e-15	2.9367e-14
TMSB15A	-1.57626	3.99437	76.928	1.77306e-18	4.92455e-17
NFIB	-1.57615	5.574	143.191	5.34019e-33	3.8038e-31
NT5C	-1.57449	2.91309	56.7381	4.97884e-14	9.58862e-13
LINC02301	-1.57435	0.676512	9.29134	0.0023024	0.00760501
AC002550.2	-1.5724	0.22656	5.73022	0.0166753	0.041753
DGKK	-1.57196	1.91246	26.1441	3.16862e-07	2.45173e-06
THRA	-1.56537	4.5256	97.2942	5.9756e-23	2.25212e-21
ZNF362	-1.56472	3.53071	62.926	2.14622e-15	4.67117e-14
SCUBE3	-1.56229	2.84137	50.7078	1.07195e-12	1.7751e-11
AC000068.1	-1.56138	0.580906	10.2639	0.0013566	0.00479138
GPRC5B	-1.56122	4.02296	95.3022	1.63433e-22	6.05229e-21
PER2	-1.55947	2.33309	37.9674	7.1935e-10	8.42562e-09
LRMDA	-1.55448	2.20061	36.2638	1.72333e-09	1.90887e-08
COL3A1	-1.55083	5.70656	86.1194	1.69393e-20	5.54232e-19
LIPE	-1.5473	0.853632	13.0335	0.000305961	0.0012748
AC004656.1	-1.54526	1.15909	16.712	4.35051e-05	0.00022203
ATP6AP1L	-1.54461	0.851475	13.3484	0.000258642	0.00109729
PPARGC1A	-1.54404	0.853347	13.1191	0.000292299	0.00122301
HIST1H2AC	-1.54388	4.65503	113.639	1.56291e-26	7.70429e-25
GPR19	-1.54021	2.34764	33.8558	5.93508e-09	5.98615e-08
ERG	-1.5402	2.34744	36.0746	1.89905e-09	2.09261e-08
DEPTOR	-1.53998	0.928435	12.8985	0.000328842	0.00135684
AP005482.1	-1.53948	1.46846	18.3525	1.8358e-05	0.000101862
UGT8	-1.53862	4.40972	106.198	6.67242e-25	2.83807e-23
TBX5	-1.53795	0.669812	9.28806	0.00230652	0.00761696
ZNF608	-1.53616	6.57683	131.474	1.95031e-30	1.18507e-28
TMEM56	-1.53548	5.71427	120.278	5.49795e-28	2.86182e-26
KIF15	-1.53314	5.47755	102.052	5.40895e-24	2.17043e-22
SFRP1	-1.53297	6.10574	112.15	3.3135e-26	1.58611e-24
PELI1	-1.53242	3.7354	66.6546	3.23503e-16	7.53676e-15
UBALD2	-1.53099	4.01438	66.0779	4.33453e-16	1.00199e-14
SOBP	-1.52994	2.58071	31.4132	2.08559e-08	1.94781e-07
ZNF628	-1.52805	0.0677534	5.5932	0.0180304	0.0444883
NR3C2	-1.52483	1.55845	17.2868	3.21409e-05	0.000167888
LRIG1	-1.52065	2.67694	34.9214	3.43286e-09	3.62447e-08
PTGIS	-1.5186	0.833814	10.2573	0.00136144	0.00480619
AC134312.5	-1.51799	0.835939	12.6376	0.000378061	0.00153692
RAB20	-1.51379	1.20288	15.4838	8.32165e-05	0.000397703
DMRTA1	-1.5122	4.04099	69.9581	6.05767e-17	1.51564e-15
LMNB1	-1.51073	6.89487	86.4949	1.40096e-20	4.59384e-19
GNG7	-1.51045	1.88055	22.8465	1.75472e-06	1.18631e-05
TCTEX1D2	-1.50987	2.95948	42.4792	7.14362e-11	9.49527e-10
ADAM22	-1.50937	2.69547	36.9943	1.18478e-09	1.35052e-08
SOX18	-1.50543	0.193939	6.82245	0.00900192	0.0246708
RPL32P33	-1.50538	1.06306	14.2882	0.000156845	0.00069846
MYO10	-1.50479	6.12086	126.188	2.79672e-29	1.58911e-27
AC024075.2	-1.50148	1.19361	13.7318	0.000210859	0.000912782
PTMAP8	-1.49797	0.193138	5.5822	0.0181439	0.0447283
KCNN2	-1.49439	0.418805	6.85675	0.00883072	0.0242502
UNC5B	-1.49416	4.81187	87.3352	9.1604e-21	3.0508e-19
AGAP2	-1.49352	2.3161	36.9151	1.23386e-09	1.39897e-08
CNTRL	-1.48935	4.77252	111.236	5.25363e-26	2.45946e-24
IRF2BPL	-1.48593	5.73154	80.9515	2.31325e-19	6.88748e-18
CDKN2C	-1.48545	3.55999	56.5924	5.36176e-14	1.03127e-12
AL451142.1	-1.48437	0.534825	9.05929	0.00261364	0.00849546
HOXC11	-1.48385	3.07508	51.9719	5.6302e-13	9.66744e-12
MCM7	-1.48324	5.37884	122.491	1.80216e-28	9.65064e-27
HMGN1P15	-1.48267	0.308608	5.98754	0.0144073	0.0368725
FAM72C	-1.48099	0.41639	6.75402	0.00935368	0.0254474
NA..71	-1.48011	1.67793	18.5046	1.69494e-05	9.48238e-05
SBK1	-1.47867	4.21555	80.9749	2.28607e-19	6.82018e-18
OSER1.AS1	-1.47858	0.629073	9.9413	0.00161611	0.00556537
STXBP5L	-1.47836	1.04509	14.5433	0.000136977	0.000618871
FRK	-1.47717	0.415645	7.61335	0.00579378	0.0169203
FZD2	-1.4768	4.64395	77.1597	1.57677e-18	4.39575e-17
AVIL	-1.47649	0.307311	7.39897	0.00652611	0.0187267
FOLH1	-1.47561	0.629266	10.79	0.00102048	0.00370535
TMEM170B	-1.47454	3.38042	49.0197	2.53408e-12	4.04772e-11
PTCHD4	-1.47177	0.890247	10.656	0.00109715	0.00396054
SUN2	-1.47	5.25913	112.632	2.59842e-26	1.25593e-24
HHIP	-1.46942	2.47104	34.2458	4.85733e-09	4.96642e-08
SOX9.AS1	-1.46937	0.889	11.5236	0.000687182	0.00261171
ENC1	-1.4688	7.39542	113.091	2.06101e-26	1.00597e-24
PLK1	-1.46804	5.15575	109.577	1.21308e-25	5.50581e-24
AC132192.2	-1.46798	1.51969	14.91	0.000112766	0.000519896
CXXC5	-1.46703	4.1922	73.4993	1.0067e-17	2.65723e-16
PODNL1	-1.46632	1.8843	26.3124	2.90411e-07	2.26947e-06
ZFP37	-1.46494	1.51522	15.018	0.000106491	0.000493105
HIST2H2BC	-1.46463	0.0344136	5.89665	0.0151697	0.0385708
PLSCR4	-1.4643	1.70934	16.5057	4.85038e-05	0.000245021
GPC3	-1.46374	1.41939	15.0522	0.00010458	0.000486059
CARHSP1	-1.46374	4.69063	83.5562	6.19292e-20	1.95326e-18
AC131649.2	-1.45763	1.10846	13.4255	0.000248224	0.00105641
AGER	-1.45521	1.95332	21.477	3.58104e-06	2.29492e-05
ACBD7	-1.45392	1.02947	13.1892	0.00028156	0.00118339
AL365361.1	-1.45352	0.79603	11.4267	0.000723967	0.00273681
KCNH2	-1.45329	1.83624	22.6711	1.92238e-06	1.29087e-05
SYPL2	-1.44959	1.87374	24.9032	6.02833e-07	4.44056e-06
SEMA6B	-1.44877	3.57551	41.7024	1.06281e-10	1.38426e-09
AC091133.1	-1.44484	0.162836	6.4765	0.010931	0.02909
CHMP1B2P	-1.44466	3.01541	44.5975	2.42002e-11	3.40519e-10
CBX2	-1.44294	3.83267	54.1524	1.8553e-13	3.37239e-12
CCDC7	-1.44272	3.45133	30.0941	4.11582e-08	3.6668e-07
ZNF784	-1.44193	0.161103	6.41216	0.0113341	0.0300127
SLC4A8	-1.4407	3.46063	48.3316	3.59912e-12	5.65191e-11
LDLRAD4	-1.44026	5.2144	84.8529	3.21407e-20	1.02678e-18
AC132872.1	-1.4397	1.74063	23.3497	1.35065e-06	9.28264e-06
ELMOD1	-1.43966	1.77548	18.072	2.12704e-05	0.000115943
ARL6IP6	-1.43819	4.38617	51.8484	5.99554e-13	1.02593e-11
C1QTNF12	-1.43786	0.607393	9.64553	0.00189813	0.00641486
CCDC144NL	-1.43618	3.58708	54.1662	1.84225e-13	3.35277e-12
ABCB4	-1.43438	1.01635	12.6464	0.000376296	0.00153141
CLMP	-1.4339	1.90307	24.7163	6.64209e-07	4.8614e-06
LINC01446	-1.43357	1.21891	16.2115	5.66477e-05	0.000281386
AC097374.1	-1.43349	2.305	33.5133	7.07777e-09	7.07159e-08
AC005041.1	-1.43281	0.604594	9.55215	0.00199716	0.00670796
PIR	-1.43252	2.54172	37.2046	1.06365e-09	1.22086e-08
MED12L	-1.43186	2.54565	35.9713	2.0024e-09	2.19674e-08
NA..2938	-1.43007	1.14799	9.67267	0.0018703	0.00633806
NA..323	-1.42938	0.280853	7.26562	0.00702871	0.0199802
AL163051.1	-1.42906	0.280416	7.38964	0.00656008	0.0188061
FAM117B	-1.42854	2.88893	43.9178	3.42461e-11	4.7162e-10
AC090922.1	-1.42568	0.602589	8.23109	0.00411788	0.0126633
SLC16A14	-1.42432	0.778407	10.2076	0.00139866	0.00491083
NA..189	-1.42197	1.44439	14.8435	0.000116812	0.000536721
SLC35F1	-1.42186	1.64136	19.7581	8.78863e-06	5.19811e-05
BEND5	-1.41953	1.436	11.5821	0.000665903	0.00253667
FAM153A	-1.4173	1.38461	17.8506	2.38944e-05	0.000128976
SLN	-1.41665	0.276908	5.96617	0.0145829	0.0372889
AC015813.6	-1.41413	2.67028	33.7456	6.28125e-09	6.31817e-08
NA..171	-1.40991	3.44283	48.7077	2.971e-12	4.71528e-11
HAPLN1	-1.4099	7.43231	149.991	1.74145e-34	1.33634e-32
FSIP1	-1.40633	1.53412	15.9095	6.64461e-05	0.000324748
PCDHB11	-1.40616	2.79506	34.899	3.47253e-09	3.65598e-08
AC016705.2	-1.40511	0.49068	7.89878	0.0049468	0.0148235
ADNP.AS1	-1.40477	0.4901	7.55921	0.0059704	0.0173359
KIF20A	-1.40214	5.92157	82.9969	8.21815e-20	2.57024e-18
TPPP3	-1.40132	0.925559	9.00286	0.00269558	0.0087313
LINC00511	-1.3997	5.71549	105.533	9.33336e-25	3.93614e-23
PPP1R9A	-1.39907	4.70957	81.7441	1.549e-19	4.687e-18
MCM2	-1.3983	5.55965	64.8617	8.03427e-16	1.82326e-14
KDM4D	-1.3983	0.487474	7.79777	0.00523108	0.0155657
PREX2	-1.39552	0.758379	8.81862	0.00298172	0.00955215
CDKN1C	-1.39549	3.5188	61.6606	4.08066e-15	8.60465e-14
MBNL3	-1.39518	1.87501	24.5336	7.3026e-07	5.31089e-06
CTDSP1	-1.39439	3.77199	61.0041	5.69548e-15	1.19253e-13
SLCO4C1	-1.39349	3.41063	40.4884	1.97786e-10	2.48267e-09
BTN3A2	-1.39331	3.43129	35.0943	3.14114e-09	3.35212e-08
TET1	-1.39146	4.29407	69.9415	6.10899e-17	1.52592e-15
FOXC1	-1.39076	5.14878	106.901	4.67894e-25	2.00159e-23
MFSD6	-1.39063	3.52809	58.9323	1.63191e-14	3.29636e-13
TJP3	-1.3905	0.671918	9.56563	0.00198254	0.00666834
LINC01158	-1.38923	0.486368	6.49026	0.0108467	0.0289071
TMEM176B	-1.38502	1.52052	18.9828	1.31906e-05	7.55551e-05
AL161772.1	-1.3845	0.131507	5.88359	0.0152826	0.0387519
ADM5	-1.38441	0.581758	7.61886	0.00577611	0.0168902
DDIT4	-1.38231	3.2458	22.4855	2.11732e-06	1.4107e-05
TMEM39B	-1.3817	3.9831	62.2238	3.06554e-15	6.52886e-14
FOXO6	-1.38115	3.75193	64.7121	8.66823e-16	1.95818e-14
AC138904.1	-1.38109	0.130172	5.8237	0.0158116	0.0399097
KCNJ11	-1.37954	0.83282	11.3366	0.000759939	0.00285543
SUV39H1	-1.37922	1.86972	18.7873	1.46139e-05	8.29104e-05
CREB3L4	-1.37637	4.32604	56.1909	6.57664e-14	1.25521e-12
SLIT1	-1.37622	0.908614	11.6298	0.000649043	0.00248197
LBH	-1.37553	4.34701	43.7235	3.7821e-11	5.18933e-10
CMPK2	-1.37511	0.25134	6.78797	0.0091774	0.0250456
RPH3AL	-1.37442	0.251567	5.99727	0.014328	0.0367121
CALHM5	-1.37398	3.49218	54.8645	1.29132e-13	2.39436e-12
INHBE	-1.37034	0.249899	5.59528	0.018009	0.0444536
PAICSP7	-1.36885	1.7087	13.2807	0.000268157	0.00113411
AP000356.1	-1.36802	0.360733	7.16973	0.0074144	0.0208852
NA..3495	-1.3659	1.2363	13.7524	0.000208558	0.000903346
TMEM37	-1.36201	3.15447	43.7427	3.74507e-11	5.14801e-10
TUBA3FP	-1.3615	0.464248	7.79879	0.00522811	0.01556
DEPDC1B	-1.36146	4.70392	50.1715	1.4088e-12	2.30977e-11
LINC01882	-1.35998	1.23086	13.2723	0.000269351	0.00113851
FBLN7	-1.35951	0.466143	6.10106	0.0135101	0.0349235
PPA2	-1.35873	2.65456	31.9283	1.59973e-08	1.51496e-07
HOXA4	-1.35789	0.359557	6.22532	0.0125936	0.0328493
GPR161	-1.35711	4.48255	75.1041	4.46535e-18	1.19992e-16
AARD	-1.35658	2.96323	33.6804	6.49535e-09	6.52472e-08
RHEBL1	-1.35648	2.03072	22.0952	2.59456e-06	1.70305e-05
ARNT2	-1.35634	2.58886	32.7197	1.06455e-08	1.0399e-07
PTPRN2	-1.35629	0.817753	9.67897	0.00186389	0.00631924
TOX	-1.35627	2.89445	39.1957	3.83385e-10	4.66296e-09
LIMCH1	-1.35506	5.74837	122.317	1.96729e-28	1.04596e-26
DOK6	-1.35332	0.462992	6.57028	0.0103696	0.0278549
NR1D2	-1.3517	4.93767	91.6954	1.01102e-21	3.54141e-20
NRG2	-1.35147	1.44761	16.3949	5.14227e-05	0.000257841
VCAN	-1.35031	0.464247	6.72886	0.00948653	0.0257524
CDH12	-1.34929	1.39478	15.2759	9.28941e-05	0.000438047
LINC02302	-1.34786	0.64874	8.46593	0.00361861	0.0113149
LHX1	-1.34554	3.14732	38.5252	5.40526e-10	6.45294e-09
CTNND2	-1.34517	1.54332	16.1359	5.89573e-05	0.000291304
CCDC144NL.AS1	-1.34433	5.56039	101.93	5.75228e-24	2.30199e-22
MID1IP1	-1.34304	1.71956	21.4557	3.62089e-06	2.31889e-05
AMN1	-1.34195	3.27225	48.5276	3.25673e-12	5.15228e-11
C11orf96	-1.34154	1.0326	12.4007	0.000429166	0.00171471
MIR205HG	-1.34145	2.08834	19.4142	1.05223e-05	6.14293e-05
FSIP2	-1.33885	1.83698	22.3037	2.32753e-06	1.53795e-05
AC016205.1	-1.33706	1.03173	11.4262	0.000724141	0.00273681
BTD	-1.33504	2.14383	26.6674	2.41662e-07	1.90754e-06
TEDC2	-1.33024	1.66835	17.4127	3.00809e-05	0.000158294
WDR34	-1.32995	4.57729	66.3138	3.84557e-16	8.93121e-15
HIRIP3	-1.32994	2.37101	31.1339	2.4083e-08	2.22944e-07
ASTN1	-1.32879	2.65293	27.8611	1.30345e-07	1.07504e-06
NA..4331	-1.32863	2.23533	23.0459	1.58175e-06	1.07671e-05
CAMK4	-1.32839	3.6223	48.7624	2.88929e-12	4.59049e-11
POTED	-1.32562	0.336295	6.03593	0.0140175	0.0360288
ROGDI	-1.32544	2.8359	25.7431	3.90015e-07	2.96383e-06
PCDHB16	-1.32534	2.39363	28.1024	1.15065e-07	9.55363e-07
NA..3176	-1.32489	2.65635	27.3781	1.67318e-07	1.35668e-06
ZNF688	-1.32443	1.93794	22.1671	2.49926e-06	1.64412e-05
EYA1	-1.32378	1.57652	15.9725	6.42688e-05	0.000315245
HES6	-1.32246	1.9383	22.1496	2.52207e-06	1.65693e-05
ING1	-1.32215	3.01286	40.5807	1.88657e-10	2.37208e-09
PAXBP1.AS1	-1.32178	0.224269	5.83517	0.0157089	0.0396841
TMEM81	-1.32115	0.538073	7.66821	0.0056202	0.016545
SMPD4P1	-1.32095	1.48467	12.106	0.000502598	0.00197889
H2AFX	-1.32088	4.9871	70.6157	4.34055e-17	1.09894e-15
TGFB3	-1.32053	2.41579	32.3926	1.25963e-08	1.21452e-07
ANKRD20A9P	-1.31898	5.82745	52.703	3.88007e-13	6.77965e-12
HMGN5	-1.31743	6.5039	33.0714	8.88367e-09	8.76998e-08
PSMB8.AS1	-1.3174	0.336087	6.49412	0.0108232	0.0288702
AC009159.4	-1.31589	0.22077	5.75334	0.0164573	0.0413178
OLFML2A	-1.31525	1.56697	17.2272	3.31658e-05	0.000172576
CUTC	-1.31243	1.47239	17.106	3.53508e-05	0.000182859
DUSP9	-1.31226	1.89527	19.8222	8.49913e-06	5.04894e-05
MAP2	-1.31181	3.58956	38.7523	4.81155e-10	5.78591e-09
VASH1	-1.30707	2.35588	27.7102	1.40917e-07	1.15583e-06
PTMA	-1.307	9.85716	103.889	2.14e-24	8.82498e-23
IKZF2	-1.30581	3.03441	29.5071	5.57134e-08	4.84183e-07
MALT1	-1.30263	4.51261	80.4805	2.93589e-19	8.62063e-18
C17orf58	-1.3016	3.04694	36.9807	1.19302e-09	1.35888e-08
BICRAL	-1.30082	3.08971	30.1609	3.97641e-08	3.54684e-07
C1QTNF3	-1.30079	0.436238	5.70725	0.016895	0.0421795
BHLHB9	-1.30037	3.12169	40.605	1.86331e-10	2.34481e-09
SHROOM2	-1.29808	2.63612	28.9083	7.58857e-08	6.45549e-07
CRYL1	-1.29496	1.50561	14.3823	0.000149196	0.000668598
ADGRL4	-1.29463	1.36024	13.4654	0.000243006	0.00103687
RBM47	-1.29284	1.4107	16.0254	6.2498e-05	0.000307878
JMY	-1.29066	4.84553	44.4144	2.65724e-11	3.72139e-10
HTR2A	-1.28995	2.69005	28.9462	7.44186e-08	6.33792e-07
ZC3H12B	-1.28811	1.30089	12.1949	0.000479199	0.00189528
AAAS	-1.28628	3.56493	30.7321	2.96223e-08	2.70378e-07
SLC7A3	-1.28557	0.996018	11.1192	0.000854381	0.00316397
RASSF5	-1.2841	2.95017	30.294	3.71279e-08	3.33367e-07
PLCE1	-1.28374	5.11483	83.6109	6.02415e-20	1.90407e-18
NME4	-1.28264	5.07424	66.6959	3.16789e-16	7.41516e-15
DAG1	-1.28253	5.33154	98.1058	3.96606e-23	1.51392e-21
KAT8	-1.28034	2.98235	35.0249	3.25516e-09	3.4614e-08
AR	-1.27953	4.6775	81.2273	2.01196e-19	6.01448e-18
LINC01963	-1.27925	1.71607	16.0021	6.32708e-05	0.000311479
AL355987.4	-1.27924	0.927359	9.33027	0.00225399	0.00746498
TCP11L2	-1.27906	1.83219	16.5522	4.733e-05	0.000239742
PMFBP1	-1.27775	0.775075	8.64096	0.00328687	0.0104044
PCDHGA6	-1.27723	0.416823	6.50413	0.0107624	0.0287545
APOLD1	-1.27674	2.55267	28.6684	8.58939e-08	7.24888e-07
ANKHD1.EIF4EBP3	-1.27616	0.414813	5.77267	0.0162773	0.0409324
ATRNL1	-1.27368	3.36946	40.9202	1.5857e-10	2.02108e-09
KIF22	-1.27234	3.75471	46.2987	1.0153e-11	1.49503e-10
PTMS	-1.26961	7.46612	118.507	1.34295e-27	6.89397e-26
SLC22A23	-1.269	2.63498	28.2815	1.04892e-07	8.74319e-07
PCDHGA10	-1.26849	1.17755	11.2074	0.000814708	0.00303366
CENPH	-1.26737	3.5108	50.4669	1.21194e-12	1.99582e-11
PRKCA	-1.26511	5.99521	107.417	3.6072e-25	1.57019e-23
PTOV1	-1.26363	4.0742	62.6261	2.49921e-15	5.38432e-14
ADAMTS10	-1.2617	1.53311	13.2284	0.000275741	0.00116156
SPRY2	-1.25992	2.09254	17.7599	2.50609e-05	0.000134347
PCDHB13	-1.25931	0.759844	7.39804	0.00652951	0.0187329
AGBL4	-1.25789	1.04833	10.597	0.00113272	0.00407313
TRIM13	-1.25777	4.46509	60.3336	8.00675e-15	1.65321e-13
HMGB3	-1.25746	4.63882	78.7628	7.00335e-19	2.00113e-17
NA..3493	-1.25705	3.76487	48.1022	4.04581e-12	6.30021e-11
SYT7	-1.25632	1.89421	18.9818	1.31973e-05	7.55647e-05
CENPA	-1.25533	4.2149	52.8427	3.61362e-13	6.33639e-12
SIX4	-1.25454	4.47916	41.3722	1.25834e-10	1.6219e-09
MED30	-1.25433	3.10248	23.6296	1.16776e-06	8.16552e-06
PTMAP4	-1.25428	0.908115	8.84962	0.00293149	0.00941557
B4GALNT4	-1.25331	2.61743	19.7987	8.60402e-06	5.09702e-05
MBD3	-1.25331	3.24985	33.4464	7.32548e-09	7.30439e-08
CDKN3	-1.25326	5.98435	106.914	4.64859e-25	1.99434e-23
NA..101	-1.25051	5.11042	65.5092	5.78433e-16	1.32275e-14
IFI44L	-1.24844	3.08997	36.1462	1.83056e-09	2.02013e-08
PDZRN3	-1.24696	0.674799	7.62016	0.00577195	0.0168863
SEMA3E	-1.246	4.86494	75.6621	3.36604e-18	9.09441e-17
AC004893.2	-1.24463	1.84996	18.0857	2.1118e-05	0.000115286
JPH4	-1.24354	4.09207	58.7078	1.82918e-14	3.67987e-13
AC023632.6	-1.24341	2.0266	13.5256	0.000235327	0.00100757
ANP32E	-1.24243	6.21037	102.116	5.23642e-24	2.10764e-22
ZNF180	-1.24094	2.02025	20.812	5.06642e-06	3.16907e-05
GINS2	-1.23955	4.14841	63.198	1.86941e-15	4.09264e-14
RMI2	-1.23784	3.5575	38.9227	4.40932e-10	5.32805e-09
ZNF341	-1.23714	0.670948	7.39183	0.00655209	0.0187868
FCF1P2	-1.23643	1.32818	11.0729	0.000875963	0.00323264
AC007738.1	-1.23559	0.583983	7.0923	0.0077416	0.0216838
NCAPH	-1.23461	5.13263	64.4015	1.01479e-15	2.27176e-14
AC024940.1	-1.23369	2.04201	20.0086	7.70956e-06	4.62232e-05
C1orf186	-1.23139	0.490459	6.80446	0.00909305	0.0248747
ZBED3	-1.23134	2.22569	21.693	3.1995e-06	2.06642e-05
CA8	-1.23124	1.80432	17.5933	2.73547e-05	0.000145232
AL359922.3	-1.23091	3.85295	26.4056	2.76738e-07	2.1706e-06
TTPA	-1.23041	0.581202	5.87298	0.015375	0.038953
NR4A2	-1.22909	0.489281	6.7501	0.00937425	0.0254987
FAM110A	-1.22866	2.07604	21.1446	4.25909e-06	2.69465e-05
ENPP1	-1.22809	3.40695	40.8118	1.67614e-10	2.12726e-09
RPS2P35	-1.22789	0.48803	6.20426	0.0127443	0.0332105
CNIH3	-1.22693	3.63622	49.1385	2.38512e-12	3.8221e-11
PGRMC1	-1.22631	7.58756	113.141	2.01001e-26	9.84307e-25
HDAC5	-1.22552	2.32309	21.9151	2.8498e-06	1.85748e-05
PCDHB10	-1.22509	1.60219	13.4763	0.00024159	0.0010323
PTENP1	-1.22436	1.41998	11.3853	0.00074028	0.00279143
TIGD3	-1.2243	0.390395	5.98749	0.0144077	0.0368725
ANGPT1	-1.2237	0.891528	9.45496	0.00210578	0.00703361
CSRP3	-1.22341	0.816429	8.29328	0.00397921	0.0123029
CTDSP2	-1.22226	4.34769	52.709	3.86813e-13	6.76673e-12
ID2	-1.22209	2.97489	36.7075	1.37253e-09	1.54677e-08
EFNB3	-1.22161	3.5097	33.6927	6.45409e-09	6.48764e-08
GDF11	-1.22084	5.82203	79.3542	5.1917e-19	1.50075e-17
RN7SL832P	-1.21953	1.20607	11.0543	0.000884808	0.00326205
BIRC5	-1.21905	5.70762	70.5867	4.40484e-17	1.11333e-15
CHST6	-1.21871	4.07763	42.4755	7.1574e-11	9.50511e-10
E2F1	-1.21408	3.93877	43.5939	4.04088e-11	5.5291e-10
TMEM215	-1.21287	0.386821	5.50676	0.0189431	0.0463824
NRP2	-1.21223	0.735311	7.77087	0.00530954	0.0157708
FGF14.AS2	-1.21132	1.1421	9.29406	0.00229898	0.00759542
AC011611.4	-1.21085	0.485532	5.37795	0.0203928	0.0492359
ETS2	-1.21055	3.77524	43.179	4.99535e-11	6.74935e-10
LRRC23	-1.20966	4.1675	30.3868	3.53936e-08	3.19142e-07
PSRC1	-1.20688	3.47262	44.0277	3.23759e-11	4.49608e-10
LINC02152	-1.20625	1.40867	12.214	0.000474311	0.00187794
ZNF775	-1.20566	0.651778	7.63681	0.0057189	0.0167626
AC002076.1	-1.20565	0.733046	7.52658	0.00607951	0.0175876
SIX5	-1.2045	2.99462	30.8822	2.74177e-08	2.51334e-07
SRRM3	-1.20413	2.3669	21.4834	3.56907e-06	2.28823e-05
U47924.2	-1.20386	0.650396	7.40827	0.00649248	0.0186482
SLITRK6	-1.20381	3.44693	39.7672	2.86113e-10	3.53181e-09
PAQR4	-1.20205	3.95725	48.1614	3.92538e-12	6.12549e-11
RAD23A	-1.20008	4.75137	55.0214	1.19226e-13	2.227e-12
SNORA79	-1.1996	0.946605	6.66886	0.00981119	0.0265321
HAS2	-1.19951	2.28389	17.7223	2.55607e-05	0.000136731
AC092919.2	-1.19829	1.5381	11.1651	0.000833485	0.00309506
NA..32	-1.1981	2.05232	17.0756	3.59213e-05	0.000185423
AKR1C3	-1.19622	0.46802	5.43331	0.0197562	0.0480338
MTAP	-1.19514	5.64688	55.9694	7.36089e-14	1.39951e-12
NA..3503	-1.19465	1.39848	12.0464	0.000518937	0.00203515
TCF7L2	-1.19427	6.00485	76.4536	2.25449e-18	6.21529e-17
BOC	-1.19378	2.25491	20.1854	7.02866e-06	4.25348e-05
SESN3	-1.19343	6.22945	103.674	2.38484e-24	9.8075e-23
ACSM3	-1.19235	1.8201	15.8209	6.963e-05	0.000339196
KBTBD11	-1.18993	1.34396	12.7862	0.000349189	0.00142979
CNBD2	-1.18874	0.86947	8.17626	0.00424421	0.01299
ZNF511	-1.18873	2.79666	28.5985	8.90534e-08	7.49428e-07
ZBTB42	-1.18833	1.6999	14.0554	0.0001775	0.00078179
LIN52	-1.18771	4.44948	57.0051	4.34693e-14	8.38247e-13
AC007390.2	-1.1865	1.85103	13.0766	0.000299014	0.00124794
AL513534.1	-1.18642	1.06455	9.52413	0.00202788	0.0068024
DLGAP5	-1.18555	6.63113	111.224	5.28437e-26	2.46609e-24
NUCKS1	-1.18425	9.17048	104.461	1.60318e-24	6.66664e-23
PIMREG	-1.18356	3.16012	34.9597	3.36599e-09	3.56651e-08
MYLIP	-1.18161	3.01206	34.1055	5.22048e-09	5.31424e-08
MTURN	-1.18085	4.65244	53.3636	2.77192e-13	4.95384e-12
AC097639.1	-1.17922	1.17718	9.36948	0.00220628	0.00732818
SLC12A7	-1.17715	5.33774	54.9234	1.25321e-13	2.33207e-12
DHPS	-1.17712	2.01	16.8721	3.99844e-05	0.000205209
IER5L	-1.17608	2.2005	12.2569	0.000463546	0.00184071
TRPA1	-1.1755	3.07208	30.7611	2.9183e-08	2.66859e-07
H2AFV	-1.17522	7.51895	93.1893	4.75233e-22	1.69659e-20
DPYSL3	-1.1744	7.28794	115.562	5.92623e-27	2.94079e-25
GPR4	-1.17294	0.714179	7.07405	0.00782082	0.0218727
RNFT2	-1.17246	4.72718	57.5129	3.35777e-14	6.57726e-13
CDON	-1.17136	3.06504	34.9577	3.3694e-09	3.56759e-08
AC025449.1	-1.17124	3.33708	37.8773	7.5337e-10	8.81022e-09
NA..4453	-1.17037	0.713767	5.99998	0.014306	0.036669
MAN1A1	-1.16933	5.72446	57.1483	4.04162e-14	7.84454e-13
NOVA2	-1.16861	4.80025	61.9897	3.45266e-15	7.3219e-14
JMJD8	-1.16624	5.15998	38.4121	5.72759e-10	6.80499e-09
GMEB1	-1.16611	4.70251	63.3163	1.76045e-15	3.85976e-14
RPS6KA5	-1.16611	2.92327	25.9166	3.56494e-07	2.7286e-06
NEXMIF	-1.16398	1.60301	14.9069	0.000112952	0.000520431
ZNF883	-1.16259	1.27472	10.7718	0.00103057	0.00373834
MANEA	-1.16249	2.8345	29.3135	6.1565e-08	5.32241e-07
MYO3A	-1.16126	3.22024	27.2987	1.74324e-07	1.40659e-06
EPHA4	-1.16116	4.17868	51.4509	7.34097e-13	1.23906e-11
AFG3L1P	-1.16066	3.27983	35.9645	2.00946e-09	2.20286e-08
PHGDH	-1.15871	5.37456	69.3985	8.04516e-17	1.97964e-15
RAB11FIP4	-1.15853	3.98343	50.9339	9.55315e-13	1.5908e-11
FLT4	-1.15742	1.63469	11.9439	0.000548264	0.0021333
NA..174	-1.1561	6.23085	85.4527	2.3731e-20	7.69681e-19
NA..1179	-1.1551	1.51149	7.78836	0.00525839	0.0156347
SORBS1	-1.15348	3.51233	40.8133	1.67486e-10	2.12726e-09
GUCY1B3	-1.15167	1.46444	12.0443	0.000519524	0.00203691
AC079160.1	-1.15135	0.711844	5.38423	0.0203196	0.0491067
HOXC4	-1.15113	1.9904	16.7232	4.32488e-05	0.000220797
GPR27	-1.15112	5.58535	54.554	1.51232e-13	2.77606e-12
NA..956	-1.14858	2.46736	23.7057	1.12249e-06	7.886e-06
CDC25B	-1.14734	5.27306	69.9923	5.95374e-17	1.49214e-15
SMAD6	-1.14622	3.44958	39.9713	2.57726e-10	3.19997e-09
MEX3D	-1.14393	5.43394	46.7828	7.93053e-12	1.18298e-10
ZNF37BP	-1.14386	4.52908	42.0762	8.77829e-11	1.15751e-09
SH3BP5	-1.14269	5.52238	79.4922	4.84129e-19	1.40492e-17
TUBGCP3	-1.14249	4.40292	59.0941	1.50307e-14	3.04438e-13
TSHZ1	-1.14104	4.44741	58.5322	1.99988e-14	3.98557e-13
PCDH1	-1.14015	1.36108	10.1606	0.00143476	0.00501745
SYNE2	-1.14011	8.4462	95.8636	1.2308e-22	4.5922e-21
RAD21	-1.13766	8.43043	111.604	4.36349e-26	2.05567e-24
FAM13A	-1.13716	3.07182	32.2892	1.3285e-08	1.27514e-07
MKI67	-1.13694	8.49481	71.9032	2.26012e-17	5.8011e-16
RNF24	-1.1363	5.15762	57.3474	3.65237e-14	7.14492e-13
NFYB	-1.13499	3.75095	42.9241	5.69061e-11	7.64586e-10
ARHGAP35	-1.13318	4.84048	69.2162	8.82405e-17	2.16772e-15
MRPL48	-1.13275	3.61362	38.8741	4.5203e-10	5.44889e-09
MKRN3	-1.12935	0.609255	6.05812	0.0138425	0.035696
AC090152.1	-1.12856	1.20446	9.59863	0.00194722	0.00656438
IGLON5	-1.12793	3.09126	21.947	2.80286e-06	1.8317e-05
KCTD14	-1.12781	1.62122	12.9506	0.000319815	0.00132289
TMEM74	-1.12566	1.03106	8.34909	0.0038588	0.0119729
RASGRP1	-1.12472	0.967347	7.1595	0.00745679	0.0209927
CDC20	-1.12428	5.33141	61.5999	4.20838e-15	8.86141e-14
GAP43	-1.12422	0.835347	6.72252	0.00952031	0.0258298
NLGN3	-1.12347	2.41178	16.4445	5.00946e-05	0.000251605
LINC01089	-1.12253	2.17362	14.2691	0.000158448	0.000705174
BTBD3	-1.12227	2.90992	27.3656	1.68401e-07	1.36323e-06
SERTAD4	-1.12219	5.6552	79.7929	4.15781e-19	1.21367e-17
ZMIZ1	-1.12186	4.57313	62.8267	2.25723e-15	4.89846e-14
HAUS4	-1.12128	3.32112	26.4599	2.69066e-07	2.11712e-06
RNF130	-1.12111	3.25152	21.2201	4.09453e-06	2.59937e-05
SUMO3	-1.12099	7.2558	103.667	2.3937e-24	9.81682e-23
CADM2	-1.11921	0.757005	6.27506	0.0122449	0.0320651
RPS2P46	-1.11905	0.756033	5.83486	0.0157116	0.0396843
SPA17	-1.11765	3.08813	30.1555	3.98754e-08	3.55464e-07
PARPBP	-1.11747	3.6642	37.5504	8.90809e-10	1.02962e-08
CA11	-1.11679	3.87787	27.8017	1.34411e-07	1.10673e-06
CACFD1	-1.11596	2.99781	24.0277	9.49621e-07	6.78034e-06
MCRIP1	-1.11493	4.84124	63.1225	1.94239e-15	4.24617e-14
PLEKHB1	-1.1136	2.65133	23.1318	1.51267e-06	1.03298e-05
ADAM11	-1.11325	1.48524	11.6859	0.00062976	0.00241443
KNTC1	-1.11073	3.78475	45.6946	1.38201e-11	2.0041e-10
NA..3553	-1.11012	0.513652	5.73242	0.0166545	0.0417119
BUB1B	-1.10965	5.81966	72.3293	1.82125e-17	4.69082e-16
REEP1	-1.10958	2.0273	17.3613	3.09052e-05	0.000161945
PDIK1L	-1.10879	1.83265	13.9718	0.00018557	0.000812764
AC129502.1	-1.10841	0.513432	5.5433	0.0185515	0.0456038
PTOV1.AS1	-1.10841	0.513332	5.52068	0.018793	0.0460984
A4GALT	-1.10688	1.35573	6.30024	0.0120722	0.0316573
E2F8	-1.10653	2.7193	20.2361	6.84474e-06	4.1557e-05
LINC02475	-1.10627	1.76161	14.7193	0.000124766	0.000568183
PIM1	-1.10475	3.46951	18.6198	1.59554e-05	8.98402e-05
PHF19	-1.10313	4.74159	55.6971	8.45418e-14	1.59718e-12
CMTM8	-1.10221	5.53782	68.7626	1.1106e-16	2.70578e-15
BMPR1A	-1.10191	4.40013	49.4628	2.02174e-12	3.25732e-11
C19orf81	-1.10175	1.86107	11.8205	0.000585825	0.00226348
GPX7	-1.10061	2.32413	16.6501	4.49487e-05	0.000228848
AIF1L	-1.09903	2.78264	18.815	1.44031e-05	8.18393e-05
EIF4E3	-1.09815	2.8031	22.6728	1.92067e-06	1.2903e-05
ZSWIM4	-1.09766	1.23826	8.92163	0.00281812	0.00908082
FAM111B	-1.09617	6.89697	75.6097	3.45663e-18	9.32225e-17
ONECUT3	-1.09541	2.29272	14.8879	0.000114091	0.000525031
SREBF1	-1.09486	4.02241	34.8509	3.55941e-09	3.74215e-08
NREP	-1.09429	4.07447	43.5253	4.18512e-11	5.71072e-10
CTSV	-1.0939	6.68002	69.8287	6.4685e-17	1.61031e-15
ZSCAN16	-1.09382	1.4336	10.1302	0.00145858	0.00508341
HIST1H2BJ	-1.09338	3.66544	40.1198	2.38853e-10	2.97557e-09
RDM1	-1.09323	1.98799	11.5978	0.000660307	0.00251922
IGF2BP1	-1.09239	1.47353	11.4779	0.0007043	0.00267293
TMPO.AS1	-1.09214	1.63849	13.1813	0.00028276	0.00118743
ALDH16A1	-1.09208	2.69547	21.6055	3.34887e-06	2.15728e-05
SSBP2	-1.08927	2.26417	18.49	1.70802e-05	9.54583e-05
TAL1	-1.08876	1.23096	8.65486	0.00326189	0.0103363
PRR7	-1.08836	2.51159	10.1013	0.00148168	0.00515369
TMEM178B	-1.08799	0.736148	5.92776	0.0149042	0.0379994
PIF1	-1.08757	4.35003	41.5641	1.14069e-10	1.47537e-09
SOX12	-1.08739	6.13051	64.2214	1.11193e-15	2.47805e-14
KAZALD1	-1.08654	2.10006	16.5117	4.83505e-05	0.000244412
MCM5	-1.0855	4.48561	51.7628	6.26268e-13	1.06918e-11
SGO2	-1.08526	6.63914	78.8922	6.55948e-19	1.88152e-17
CDCA7	-1.08471	2.89824	24.9476	5.89108e-07	4.35238e-06
FOXG1	-1.08168	1.97631	15.8837	6.73567e-05	0.000328767
MAML2	-1.08107	4.01381	47.2096	6.37871e-12	9.6406e-11
ARF6	-1.08044	4.98142	45.0126	1.95772e-11	2.77567e-10
HOXA9	-1.08018	3.30461	27.5677	1.51693e-07	1.23672e-06
KANSL1L	-1.07864	3.42941	31.6959	1.80306e-08	1.69351e-07
FRAT1	-1.0786	0.582807	5.43586	0.0197274	0.0479872
H3F3B	-1.07841	8.67297	102.115	5.23832e-24	2.10764e-22
REPIN1	-1.07756	3.92207	44.7676	2.2186e-11	3.13362e-10
SAYSD1	-1.07668	2.62925	22.9223	1.68686e-06	1.14355e-05
E2F5	-1.0763	1.26468	6.64647	0.00993523	0.0268188
SH3BP5.AS1	-1.07593	0.873001	7.65087	0.00567448	0.0166817
TMEM200C	-1.07548	4.6022	44.59	2.4293e-11	3.41501e-10
MARCKSL1	-1.07413	5.03979	37.8833	7.51072e-10	8.79026e-09
NRDE2	-1.0739	3.84609	33.5395	6.983e-09	6.98629e-08
KIF18B	-1.07328	4.47349	31.8836	1.63695e-08	1.54726e-07
PAFAH1B3	-1.07138	4.71385	47.6464	5.10448e-12	7.8665e-11
TIMELESS	-1.07114	5.79877	78.1283	9.65602e-19	2.73808e-17
LRTOMT	-1.07082	1.22096	8.0494	0.00455186	0.0138039
KIAA1644	-1.06999	1.80447	11.7391	0.000612022	0.0023537
TNFRSF11B	-1.06961	5.48571	34.3235	4.66723e-09	4.79842e-08
PANX2	-1.06951	2.29701	15.3552	8.90746e-05	0.00042231
ETV6	-1.06882	5.36988	63.7985	1.3782e-15	3.03959e-14
ERF	-1.06819	4.62001	33.2419	8.13763e-09	8.07633e-08
SPINK5	-1.06791	2.64153	21.4419	3.64719e-06	2.33429e-05
AC010618.3	-1.06782	0.65261	5.62367	0.0177195	0.0438773
CRISPLD1	-1.06746	5.37753	51.2285	8.22167e-13	1.37678e-11
ZNF687	-1.0673	2.32081	15.9549	6.48683e-05	0.000317872
HMGB1	-1.06707	7.11493	62.7225	2.37986e-15	5.14209e-14
MT1X	-1.06636	3.0113	23.5476	1.21863e-06	8.48937e-06
ANKRD37	-1.06513	1.41123	11.3173	0.000767874	0.00288161
C8orf37	-1.06487	2.31878	16.818	4.11422e-05	0.00021062
MUTYH	-1.06434	1.2177	7.82809	0.00514404	0.0153373
ADCY10P1	-1.06418	0.795589	5.51923	0.0188086	0.0461215
TSPAN13	-1.06412	5.3428	51.3202	7.84631e-13	1.31837e-11
AC091181.1	-1.06005	0.871132	5.93698	0.0148264	0.0378458
GLIS2	-1.05816	3.83357	32.5516	1.16071e-08	1.12668e-07
SRSF12	-1.05805	0.92657	7.63163	0.00573534	0.0167976
FGF13	-1.05788	1.04943	8.67162	0.00323203	0.0102526
RIMS4	-1.05739	3.60572	32.8108	1.01577e-08	9.9616e-08
SPC25	-1.05685	4.19888	35.628	2.38832e-09	2.57644e-08
FAM153B	-1.05646	2.13675	13.5151	0.000236656	0.00101297
CBX8	-1.0563	1.71838	8.22047	0.00414205	0.0127218
SLC37A4	-1.05532	4.64872	26.2088	3.06416e-07	2.38287e-06
MFSD3	-1.05527	3.36912	33.512	7.08252e-09	7.0716e-08
CDCA7L	-1.05512	3.60038	30.8824	2.74143e-08	2.51334e-07
EFCAB2	-1.05477	1.4109	8.87751	0.00288704	0.00929285
NSUN7	-1.05475	2.23988	17.3849	3.05242e-05	0.000160287
SESTD1	-1.05422	4.70563	58.1849	2.38599e-14	4.70466e-13
LSM2	-1.05383	4.16004	40.2332	2.2538e-10	2.81953e-09
CELSR2	-1.0534	5.04835	57.0445	4.26069e-14	8.23752e-13
RTBDN	-1.05282	1.69673	9.73623	0.00180671	0.00614638
ARSD	-1.05206	1.15937	8.2304	0.00411945	0.0126655
NDC80	-1.05156	7.44026	58.9941	1.58146e-14	3.19881e-13
CNTLN	-1.05082	5.19411	52.0121	5.51598e-13	9.49323e-12
GRID2	-1.05035	2.79188	20.6493	5.51571e-06	3.4242e-05
MRPL54	-1.05028	2.18282	17.199	3.36608e-05	0.000174711
AC104986.2	-1.04946	1.39774	7.84379	0.00509955	0.0152352
IGSF9	-1.04928	3.77977	29.7782	4.84415e-08	4.25287e-07
TESC	-1.04801	1.3059	8.65687	0.00325831	0.0103271
SEMA4C	-1.04787	3.98206	34.6309	3.98521e-09	4.1517e-08
PCSK5	-1.04758	4.42164	40.0232	2.50962e-10	3.1212e-09
LCORL	-1.04725	4.37774	33.6732	6.51938e-09	6.54444e-08
AGBL3	-1.04707	0.856576	6.25555	0.0123805	0.0323916
SEMA6A	-1.04601	4.32496	38.8537	4.56776e-10	5.50164e-09
LRRIQ1	-1.04467	3.89173	15.7938	7.06345e-05	0.000343191
SYT3	-1.0437	0.854434	6.79912	0.00912029	0.0249308
BEAN1	-1.04351	1.20369	8.37803	0.00379785	0.0118158
ZBTB8B	-1.04264	0.716941	6.05956	0.0138312	0.0356732
VEZF1	-1.04232	5.83703	53.8708	2.14116e-13	3.86369e-12
TTC9	-1.0422	2.78378	17.9107	2.31512e-05	0.000125374
EDIL3	-1.04219	7.08007	80.9371	2.33013e-19	6.92387e-18
SLAIN1	-1.041	1.56764	9.64917	0.00189437	0.00640505
SLC25A43	-1.04094	2.06841	16.1465	5.8628e-05	0.000289773
HNRNPA0	-1.04093	6.69992	71.303	3.06371e-17	7.82323e-16
TTC31	-1.04052	2.92084	22.7859	1.81092e-06	1.22031e-05
OIP5	-1.03964	4.97565	51.4191	7.46082e-13	1.25786e-11
RCE1	-1.03959	1.38873	6.51113	0.0107202	0.0286776
DEK	-1.03849	7.47618	59.4244	1.27085e-14	2.59166e-13
ENOX2	-1.03815	2.25301	16.4886	4.89436e-05	0.000246824
LSM6	-1.03614	3.16908	24.7131	6.65297e-07	4.86645e-06
RTN4R	-1.0358	5.74647	38.1196	6.65385e-10	7.84912e-09
AL162274.2	-1.03529	1.34732	9.81902	0.00172716	0.00591223
AP4M1	-1.03468	3.13266	26.1714	3.12408e-07	2.42104e-06
THAP10	-1.03463	1.51618	8.30321	0.0039575	0.012251
KLHL42	-1.03454	6.0588	65.7932	5.00813e-16	1.1494e-14
ZMAT4	-1.03447	0.851164	5.64794	0.0174759	0.0433758
ARL2	-1.03414	3.52814	33.2895	7.94114e-09	7.89184e-08
AL161421.1	-1.03388	1.24934	8.93777	0.00279333	0.00901459
MSL3P1	-1.03377	2.91424	25.4344	4.57676e-07	3.43592e-06
XRCC1	-1.03239	3.6648	16.6045	4.60409e-05	0.000234008
DHFR	-1.03233	4.76316	33.1821	8.39192e-09	8.31207e-08
MPZL2	-1.03225	1.64412	9.36204	0.00221525	0.00735305
B3GNT4	-1.03183	1.24765	9.34988	0.00223	0.00739541
ITPKB	-1.03055	1.684	7.87263	0.00501887	0.0150062
SOX4	-1.03043	7.72696	70.4859	4.63578e-17	1.16773e-15
MOB3A	-1.02999	2.36518	17.2517	3.27406e-05	0.000170721
KAT5	-1.02986	3.64496	24.8596	6.16606e-07	4.53977e-06
B4GALNT1	-1.02869	5.16254	48.4442	3.39819e-12	5.35332e-11
NR1H3	-1.02799	1.0303	7.63408	0.00572757	0.0167781
ZNF367	-1.02776	4.06991	21.5315	3.4807e-06	2.23543e-05
DUT	-1.02718	6.47511	58.6769	1.85811e-14	3.73302e-13
ADAMTSL3	-1.02677	3.09918	27.6724	1.43701e-07	1.17672e-06
PKDCC	-1.02637	1.5139	9.13304	0.00251034	0.00819368
VSIG10L	-1.02627	1.84789	12.9108	0.000326699	0.00134912
DCHS1	-1.0253	2.95095	16.1828	5.75132e-05	0.000285209
SERPINB1	-1.025	3.17574	22.6613	1.93222e-06	1.29689e-05
TAS2R14	-1.02448	1.47294	9.4949	0.00206044	0.00689764
COL26A1	-1.02407	1.47213	9.56925	0.00197864	0.00665973
BPHL	-1.02401	1.63522	11.4574	0.000712114	0.00269752
ZNF385A	-1.02371	1.14046	6.94819	0.00839043	0.0232431
HIST1H2BD	-1.02327	3.88446	38.3278	5.98057e-10	7.08296e-09
FBXL7	-1.02323	0.775498	5.64791	0.0174762	0.0433758
PKN1	-1.02303	2.11069	12.2141	0.000474299	0.00187794
SGF29	-1.02288	1.68322	7.97485	0.00474317	0.0143013
TRDMT1	-1.02281	2.38672	18.4314	1.76132e-05	9.81314e-05
SDC2	-1.02273	6.48583	67.0719	2.61779e-16	6.17607e-15
SPACA9	-1.02235	1.02951	6.96824	0.00829689	0.0230268
DCLK3	-1.0223	0.629314	5.44487	0.0196259	0.0477871
RFC4	-1.02165	5.72185	35.2188	2.94666e-09	3.15136e-08
RPL13AP25	-1.02159	1.98627	8.21087	0.00416402	0.0127814
RPS6KA2	-1.02019	1.33476	7.69428	0.00553962	0.0163444
FANCC	-1.02008	3.15707	26.0685	3.29523e-07	2.53914e-06
JUNB	-1.01898	3.36685	18.0839	2.11383e-05	0.000115354
ANP32A	-1.01817	5.9669	64.6893	8.76882e-16	1.97491e-14
RNF123	-1.01805	3.19348	26.6924	2.38555e-07	1.88601e-06
NA..48	-1.01731	1.90403	13.0273	0.000306989	0.001278
CSRNP3	-1.01626	2.48693	19.9214	8.06924e-06	4.81084e-05
IER3	-1.0158	8.57276	67.9626	1.66626e-16	4.00736e-15
SEMA4D	-1.01531	3.84755	33.2	8.31514e-09	8.24151e-08
DIP2C	-1.01469	2.94862	23.5115	1.24171e-06	8.62187e-06
HOXA7	-1.01377	3.23433	19.9566	7.92193e-06	4.73249e-05
CCDC167	-1.01332	2.44508	18.2098	1.97858e-05	0.000108892
POLD1	-1.01318	2.8002	19.5	1.00598e-05	5.89146e-05
ZNF117	-1.01146	0.964341	6.40073	0.0114073	0.0301904
ZNF521	-1.01013	2.1047	15.0282	0.000105916	0.000491206
CHRAC1	-1.00864	4.98374	42.9672	5.5665e-11	7.48586e-10
SNRNP35	-1.00752	3.30787	17.2673	3.24734e-05	0.000169388
ZNF618	-1.00747	4.69838	54.5216	1.53748e-13	2.81878e-12
FAM78B	-1.00669	0.83587	5.98797	0.0144038	0.0368725
NSD2	-1.0066	6.31722	66.4193	3.64511e-16	8.47887e-15
CCDC8	-1.00466	2.15684	14.6955	0.000126345	0.000574495
KIF11	-1.00413	5.70149	54.1778	1.8314e-13	3.3371e-12
THBS4	-1.00303	2.32349	9.60382	0.00194173	0.00654882
RMI1	-1.00277	3.991	27.7713	1.36538e-07	1.12301e-06
NA..2780	-1.00275	1.54711	9.51371	0.00203942	0.00683557
CCDC34	-1.00163	7.22137	40.4672	1.99949e-10	2.5077e-09
SLC25A45	1.00097	1.64121	9.76455	0.00177909	0.00607183
ZNF746	1.00235	1.42538	10.582	0.00114195	0.00410435
RETSAT	1.0029	5.03628	36.4961	1.52973e-09	1.71127e-08
TMEM120B	1.00381	3.90619	34.5097	4.24132e-09	4.39086e-08
TMEM253	1.00654	0.844883	6.86413	0.00879429	0.0241726
ZNF583	1.00669	2.38099	17.5616	2.78149e-05	0.000147464
AL353622.1	1.00678	2.30002	16.5134	4.83073e-05	0.000244277
PCDH11X	1.00712	1.12537	7.26981	0.00701234	0.0199375
MAP1A	1.0088	6.97886	47.2728	6.17633e-12	9.34421e-11
LINC02476	1.009	2.34962	15.0209	0.000106327	0.000492581
CCDC90B	1.00902	5.54761	48.5236	3.26334e-12	5.15725e-11
GDPD5	1.00915	3.14778	18.9614	1.33388e-05	7.62577e-05
SUN3	1.00939	4.33009	39.8484	2.74458e-10	3.39357e-09
LINC02381	1.00964	2.6794	22.1682	2.49778e-06	1.64388e-05
TP53INP2	1.01235	2.92943	24.6641	6.82422e-07	4.9849e-06
XYLT1	1.01243	4.49941	47.4394	5.6732e-12	8.65338e-11
RNF6	1.01458	4.26767	46.6871	8.32747e-12	1.23724e-10
WNT5B	1.01488	3.04946	19.881	8.24162e-06	4.90772e-05
AC008105.3	1.01517	1.39793	8.76828	0.00306514	0.009792
FANK1	1.01568	2.27344	15.1726	9.81188e-05	0.000458617
HMGN3.AS1	1.01582	0.744781	5.65009	0.0174545	0.0433509
ATP6AP2	1.01653	7.14857	82.3314	1.15077e-19	3.53956e-18
CYTOR	1.01674	5.3971	53.113	3.14904e-13	5.56107e-12
MAGEL2	1.01765	2.35294	12.3859	0.000432579	0.00172695
LINC00452	1.018	2.32777	16.0317	6.22922e-05	0.000307067
MOSPD1	1.01873	2.36164	17.6701	2.62731e-05	0.000140139
KCNIP3	1.02021	1.17198	8.80178	0.00300937	0.00963246
JCAD	1.02087	2.36026	13.4472	0.000245374	0.00104547
CPNE8	1.021	4.20322	46.3747	9.76704e-12	1.44248e-10
LRRC8E	1.02154	4.55671	38.3816	5.81785e-10	6.90673e-09
PDIA5	1.02207	5.08438	58.0982	2.49349e-14	4.90365e-13
ELFN2	1.0223	5.49026	49.8135	1.69074e-12	2.75083e-11
CPEB4	1.02235	4.65905	44.2869	2.83604e-11	3.96061e-10
BAIAP2	1.02281	4.37781	47.7403	4.86593e-12	7.52224e-11
KATNBL1	1.02308	4.65761	55.3703	9.98354e-14	1.87658e-12
ANKRA2	1.02388	3.6252	30.0546	4.20055e-08	3.74005e-07
TRAF4	1.02444	3.02432	19.8085	8.56022e-06	5.07915e-05
FRMD4A	1.02567	2.04843	15.8504	6.85533e-05	0.000334388
LINC00958	1.02638	5.76737	66.9826	2.73913e-16	6.44193e-15
NCOR1P3	1.02644	2.06294	12.3984	0.000429708	0.00171641
ACTG1P17	1.02793	1.43881	10.8816	0.000971256	0.00354389
ASGR1	1.02794	1.14246	6.1373	0.0132359	0.0343042
RPS4XP5	1.02812	5.47635	45.8144	1.30005e-11	1.89373e-10
CRABP2	1.02867	2.51178	15.9783	6.40712e-05	0.000314483
QTRT1	1.02902	1.29017	6.99401	0.0081783	0.0227763
UNC13D	1.03144	4.77749	47.5507	5.35994e-12	8.20076e-11
WIPI1	1.0315	4.51145	55.7141	8.38156e-14	1.58547e-12
HBE1	1.03152	3.34679	34.2613	4.81881e-09	4.9376e-08
A1BG.AS1	1.03244	1.57327	11.8326	0.000582012	0.00225042
ERC2	1.03316	3.03353	27.3673	1.6825e-07	1.36275e-06
MCC	1.03447	4.46987	37.4662	9.30099e-10	1.07336e-08
DCAF17	1.03479	3.41959	30.4796	3.37402e-08	3.04973e-07
NFATC2	1.03495	1.93013	11.2917	0.000778549	0.00291652
CLSTN3	1.03561	4.32808	34.6751	3.89574e-09	4.06703e-08
TCTA	1.03605	2.13536	16.4259	5.059e-05	0.000253836
PDE1C	1.03801	3.34912	31.4149	2.08374e-08	1.94731e-07
HDAC10	1.03807	2.07949	13.1647	0.000285279	0.00119632
HM13.AS1	1.03868	0.63539	5.49095	0.0191151	0.0467269
TCP11L1	1.04025	4.07987	41.2817	1.31799e-10	1.69146e-09
VGF	1.04048	5.29181	40.1998	2.29268e-10	2.86335e-09
CCDC84	1.04073	6.17164	67.2615	2.37786e-16	5.61891e-15
PI4K2A	1.04073	3.30072	26.5248	2.6017e-07	2.0482e-06
SAMD9L	1.04156	3.17559	25.5456	4.32061e-07	3.25346e-06
SYBU	1.04319	0.922614	6.77055	0.00926743	0.0252451
APLF	1.04375	2.14521	17.3069	3.18027e-05	0.000166355
MYO7A	1.04394	1.7801	11.6866	0.000629531	0.00241434
ATP6V0A1	1.04421	2.47403	17.4874	2.89226e-05	0.00015301
PLEKHN1	1.04468	1.00733	7.23815	0.00713704	0.0202534
HCN4	1.0451	1.5507	12.1329	0.0004954	0.00195261
MYO16	1.04737	1.51391	10.2559	0.00136246	0.00480867
AC011511.1	1.04896	1.86724	14.4456	0.000144269	0.000648665
KCNQ3	1.0494	2.9732	20.0623	7.49592e-06	4.51606e-05
ALKBH1	1.05158	1.61972	10.2385	0.0013754	0.00484398
UPP1	1.05215	2.58471	20.3372	6.49269e-06	3.95999e-05
FAM131A	1.05297	3.76259	19.7445	8.85154e-06	5.23324e-05
ZNF774	1.05319	1.34422	9.93883	0.00161828	0.00557155
KCNG1	1.05339	3.35119	35.8302	2.15281e-09	2.34619e-08
SERPINB8	1.05462	1.58562	12.5142	0.00040387	0.00162585
FHL3	1.05492	2.49424	20.2078	6.94681e-06	4.21251e-05
DAGLB	1.05495	4.47705	41.2513	1.3386e-10	1.71495e-09
KCTD8	1.05575	0.701343	6.02106	0.0141361	0.0363023
PARP10	1.05724	1.90962	10.6352	0.00110955	0.00399949
UAP1	1.05776	4.42272	49.944	1.58195e-12	2.5823e-11
PARVG	1.05782	2.99656	26.9745	2.06155e-07	1.64207e-06
SPNS1	1.05839	1.2737	8.33858	0.0038812	0.0120324
MTND5P11	1.05927	4.85874	41.1256	1.42751e-10	1.82572e-09
CYFIP2	1.05932	5.09722	58.2192	2.3448e-14	4.62959e-13
GALNT2	1.05979	7.38179	72.5293	1.64567e-17	4.26813e-16
MTCO2P22	1.06122	0.520616	5.48958	0.0191301	0.0467432
NFKBIE	1.06337	1.52439	11.8379	0.000580366	0.00224472
CHST11	1.06362	3.56365	37.0141	1.17279e-09	1.33788e-08
PPP2R5B	1.06571	1.77339	11.3754	0.000744221	0.00280487
PCOLCE2	1.06579	5.49944	57.9246	2.72366e-14	5.34218e-13
ATP6V0D1	1.06606	3.8649	34.9684	3.35104e-09	3.55434e-08
NA..5	1.06701	4.78313	46.8406	7.70028e-12	1.14979e-10
PEA15	1.06708	6.22925	74.6541	5.60859e-18	1.49633e-16
TRIP6	1.06733	4.47633	50.045	1.50261e-12	2.45817e-11
TP53TG1	1.06754	2.54017	22.6466	1.94703e-06	1.30616e-05
ZBTB11.AS1	1.06773	1.10707	7.97464	0.00474373	0.0143013
PNP	1.06859	3.88733	49.5605	1.92352e-12	3.11254e-11
ANKRD20A17P	1.07078	1.52343	10.5305	0.00117421	0.00420913
AC010326.4	1.07104	1.1584	8.63332	0.0033007	0.0104415
C9orf47	1.07288	1.20394	9.52503	0.00202689	0.0068006
AC025627.4	1.07308	3.13493	10.9996	0.000911291	0.00334477
CAPN2	1.07344	5.78105	79.4487	4.94915e-19	1.43343e-17
HDAC2.AS2	1.07489	3.82092	32.5352	1.17053e-08	1.13448e-07
NPEPL1	1.07525	1.20329	9.99358	0.00157087	0.00542965
CYB5R1	1.076	4.95657	51.7181	6.40691e-13	1.0913e-11
ZNF697	1.07742	3.95222	34.4838	4.29816e-09	4.44047e-08
SLC25A15	1.07971	1.50217	10.2281	0.00138314	0.00486552
FHIT	1.08064	0.6614	6.46921	0.0109759	0.0292043
COL4A5	1.0814	3.31874	31.9903	1.54947e-08	1.47204e-07
ASCC3	1.08588	6.05179	78.8365	6.74674e-19	1.93151e-17
RTN1	1.0863	4.23722	46.8418	7.69559e-12	1.14979e-10
L3HYPDH	1.08804	2.9665	21.5167	3.50753e-06	2.25137e-05
C1GALT1	1.08852	6.78509	83.443	6.55785e-20	2.06399e-18
TRAF3IP2.AS1	1.08878	1.12553	8.86594	0.0029054	0.00934183
CTIF	1.08879	1.85843	14.3219	0.000154064	0.00068785
ROBO3	1.08895	2.29493	12.5366	0.000399053	0.00160907
MMP24	1.08914	1.9468	16.6577	4.47674e-05	0.000228003
AP002884.3	1.09044	1.67716	12.3513	0.000440685	0.00175508
NA..576	1.09144	2.10878	15.4507	8.46841e-05	0.000403551
PIDD1	1.09175	2.3922	21.1393	4.2709e-06	2.70097e-05
POLH	1.09203	3.3817	34.9357	3.40772e-09	3.6056e-08
MFSD1	1.09502	5.79384	66.7267	3.11881e-16	7.31177e-15
MELTF	1.09541	6.53891	60.7187	6.58414e-15	1.37473e-13
NA..5721	1.09548	0.661756	5.43399	0.0197485	0.0480238
BLOC1S2	1.09603	5.65155	77.2825	1.48172e-18	4.15411e-17
NDUFAF6	1.09669	3.65363	39.7433	2.89635e-10	3.57233e-09
ADAM12	1.09805	5.11407	65.9181	4.70066e-16	1.08326e-14
CDK18	1.09853	1.47622	12.6325	0.000379093	0.00154066
MAFK	1.09859	4.86705	63.9486	1.27706e-15	2.83332e-14
IFFO2	1.09915	3.64768	37.8514	7.63451e-10	8.91411e-09
SLC43A3	1.10226	6.18566	70.3603	4.94044e-17	1.24237e-15
AK4	1.1026	4.16844	53.7267	2.30409e-13	4.14765e-12
MOK	1.1035	3.57551	31.6151	1.87963e-08	1.76321e-07
RBKS	1.10628	1.63917	10.6817	0.00108203	0.00391069
CTTN	1.10791	6.29561	82.7858	9.14435e-20	2.83608e-18
PPM1J	1.10799	1.58498	14.4238	0.000145946	0.000655812
SCARB1	1.1087	5.29943	72.4593	1.70514e-17	4.39939e-16
FUCA1	1.10901	5.11704	66.0814	4.32679e-16	1.00176e-14
BTBD10	1.10924	4.71167	64.8157	8.22427e-16	1.86071e-14
AC156455.1	1.11029	1.70681	14.2627	0.000158987	0.000706729
BIRC3	1.11047	3.17597	26.573	2.5376e-07	2.00177e-06
MT.TT	1.11087	4.65103	32.8254	1.00816e-08	9.89357e-08
SLC35E4	1.11115	3.20578	32.5631	1.15387e-08	1.12125e-07
DOCK3	1.1113	1.09443	8.80589	0.0030026	0.00961491
LINC01588	1.11144	0.847891	5.51501	0.0188539	0.0462174
FOXN3.AS1	1.11228	0.543799	6.1377	0.013233	0.0343025
NA..425	1.11256	0.617311	5.84325	0.0156369	0.0395156
ARSA	1.11266	3.26557	20.5552	5.7935e-06	3.58321e-05
BCL10	1.11365	3.8254	35.9265	2.04899e-09	2.24289e-08
TMEM87B	1.11366	5.66899	82.0353	1.33678e-19	4.06966e-18
OAT	1.11498	5.57581	36.0701	1.90347e-09	2.09593e-08
SPAG17	1.11517	1.77116	15.6173	7.75434e-05	0.000373123
HERC2P9	1.11538	4.09028	17.4272	2.98518e-05	0.000157256
FLYWCH1	1.11557	2.88985	27.4497	1.61231e-07	1.31017e-06
ACSL4	1.11634	5.15515	54.0163	1.98836e-13	3.60106e-12
GAB2	1.11681	3.51037	34.3898	4.51072e-09	4.64392e-08
PDZD7	1.1173	1.52757	10.2145	0.00139343	0.00489591
MICALL2	1.11865	4.48939	49.1614	2.35746e-12	3.78185e-11
ALKBH6	1.11875	1.96243	16.4739	4.93252e-05	0.000248328
PRKAG2	1.12123	1.38868	11.5523	0.000676668	0.00257636
HERC2P2	1.12221	2.38364	17.2968	3.19717e-05	0.00016718
RIOK3	1.1223	3.95371	45.3989	1.60723e-11	2.3185e-10
NEMP2	1.12286	4.43808	62.3135	2.92905e-15	6.24711e-14
MT.TD	1.12396	2.30078	20.9304	4.76288e-06	2.99556e-05
AL731532.2	1.12623	0.343685	5.3585	0.0206215	0.049651
SMPDL3B	1.12832	4.41947	51.4781	7.24009e-13	1.22342e-11
MARCH3	1.12849	1.67	9.9074	0.00164616	0.00565705
NA..74	1.12901	2.30653	19.4275	1.04492e-05	6.10505e-05
PML	1.12999	3.38573	35.2526	2.89601e-09	3.10165e-08
SNORA80A	1.13008	0.748168	6.79738	0.00912916	0.024946
PCNX2	1.13089	4.80559	45.647	1.416e-11	2.0486e-10
CHPF2	1.13109	2.3789	18.3765	1.81279e-05	0.000100848
FAM133A	1.13111	2.89247	23.4196	1.30242e-06	8.98062e-06
CCNYL2	1.13197	3.29061	36.1879	1.79182e-09	1.97884e-08
SH2D5	1.13399	3.28263	33.9515	5.65027e-09	5.72605e-08
COL18A1	1.13471	2.62036	22.35	2.27216e-06	1.5047e-05
POU3F2	1.13475	0.422332	5.6893	0.0170686	0.042563
PLAC8	1.13478	1.9908	15.5268	8.13423e-05	0.000389371
CDR2L	1.13509	3.83718	43.9672	3.33933e-11	4.62013e-10
TMEM243	1.13606	3.0268	18.9216	1.36204e-05	7.77479e-05
APOL2	1.13618	3.97704	36.5921	1.45618e-09	1.63732e-08
ANTXR2	1.13631	4.25015	53.8767	2.13475e-13	3.8568e-12
DPYSL4	1.13649	2.42042	24.8025	6.3516e-07	4.66254e-06
DUSP3	1.13765	4.89315	57.2667	3.80542e-14	7.43455e-13
TNFRSF10B	1.13849	5.31862	69.4504	7.83595e-17	1.93777e-15
COPZ2	1.13932	3.21988	37.5869	8.74287e-10	1.01446e-08
CCDC62	1.13966	3.05986	36.2683	1.71942e-09	1.90738e-08
AC068446.2	1.13994	0.864131	7.69416	0.00553998	0.0163444
PLEK2	1.14129	3.37056	35.1581	3.03999e-09	3.2465e-08
RELB	1.1415	3.23837	39.8101	2.7989e-10	3.45786e-09
FBXW7	1.14279	5.55738	75.9131	2.96423e-18	8.12679e-17
PXN	1.14301	5.36604	56.4228	5.84487e-14	1.1213e-12
FAM129B	1.14342	4.71212	70.223	5.29648e-17	1.32966e-15
ACAP1	1.14413	2.14093	19.0635	1.2644e-05	7.27605e-05
LINC00632	1.14481	2.29059	23.9906	9.68062e-07	6.89218e-06
LRP1	1.14506	5.68856	71.8075	2.37246e-17	6.07897e-16
PCDHAC1	1.1477	0.497229	6.49827	0.010798	0.028834
KRT15	1.14928	0.42085	5.46913	0.0193553	0.0472287
PRKAB2	1.1504	5.58285	73.781	8.72809e-18	2.31613e-16
ARC	1.15054	3.20284	32.7813	1.03133e-08	1.00918e-07
STON2	1.15061	3.76351	47.5943	5.24214e-12	8.04534e-11
LURAP1L	1.15206	1.64333	16.2103	5.6685e-05	0.00028141
AL118506.1	1.15291	0.49817	5.69687	0.0169952	0.0424011
PERP	1.15298	5.78305	79.5305	4.7485e-19	1.38068e-17
MKX	1.15335	0.638038	6.48033	0.0109075	0.0290379
AC005291.1	1.15349	3.20292	34.2534	4.83838e-09	4.95044e-08
LINC01297	1.15439	0.571427	7.06358	0.00786667	0.0219803
SLC37A1	1.15441	2.61691	24.8584	6.17004e-07	4.54045e-06
AL589993.1	1.15531	0.571145	7.20731	0.00726071	0.0205374
AC005831.1	1.15621	2.03343	19.8333	8.4496e-06	5.02353e-05
MYO18B	1.15911	3.41601	34.9229	3.4302e-09	3.62423e-08
NTN4	1.15967	2.61807	18.1113	2.08357e-05	0.000114006
ZNF114	1.16022	1.51341	15.3077	9.13423e-05	0.000431687
APOBEC3C	1.16084	5.63516	77.5135	1.3182e-18	3.71667e-17
CHPF	1.16162	5.53953	88.6306	4.75875e-21	1.61375e-19
NME7	1.16185	4.84919	68.1225	1.5365e-16	3.70127e-15
ANKRD26P1	1.16455	2.91426	31.2031	2.32395e-08	2.1569e-07
RUNDC3A.AS1	1.16532	1.02585	10.8102	0.00100944	0.00366794
ABL2	1.16636	6.66938	108.984	1.63582e-25	7.35724e-24
SIRT4	1.16691	0.766788	7.60516	0.00582016	0.0169792
SCN4B	1.167	2.74103	26.2419	3.01215e-07	2.34652e-06
AL080317.1	1.16913	0.637382	6.57156	0.0103621	0.0278499
MYEOV	1.16922	4.79235	72.7224	1.49231e-17	3.89071e-16
CA5BP1	1.16963	0.704606	8.09741	0.00443286	0.013487
ZNF667	1.17234	3.54565	46.3285	9.99979e-12	1.47393e-10
SLC22A15	1.17273	2.52422	23.356	1.34622e-06	9.2612e-06
AC112220.2	1.17274	0.703768	5.84578	0.0156145	0.0394858
ABAT	1.17414	3.4617	37.614	8.6225e-10	1.00127e-08
FAM98C	1.17504	3.48094	43.3961	4.47083e-11	6.08385e-10
ISG20	1.17554	0.765183	8.62629	0.00331346	0.0104774
MACROD2	1.17563	1.1252	10.8128	0.001008	0.0036636
LINC01186	1.17605	2.13933	21.3068	3.91334e-06	2.49285e-05
PHLDA3	1.17713	4.40042	42.103	8.65912e-11	1.1428e-09
EFR3B	1.17772	4.0199	33.6121	6.72718e-09	6.74394e-08
NTN1	1.17779	3.82971	45.086	1.88568e-11	2.68648e-10
S100A2	1.17824	6.82864	102.58	4.14319e-24	1.67608e-22
MYO6	1.17908	7.08404	73.5997	9.56777e-18	2.52994e-16
CEP85L	1.18132	4.18791	48.3599	3.54748e-12	5.58259e-11
PROS1	1.182	3.77864	53.1141	3.14729e-13	5.56107e-12
SLC46A1	1.18209	2.0351	13.7302	0.000211032	0.000913265
HYDIN	1.18296	0.56594	5.36284	0.0205703	0.0495518
MATN1.AS1	1.18407	0.368215	5.73613	0.0166193	0.0416379
CRYAB	1.1842	4.77492	49.5318	1.95184e-12	3.15495e-11
QSOX1	1.18463	6.56475	75.9933	2.84634e-18	7.81798e-17
HDAC9	1.18515	3.68266	49.2062	2.30422e-12	3.70442e-11
SAMD5	1.18591	1.26217	12.5975	0.000386268	0.0015643
RDH13	1.18673	1.52495	14.9036	0.000113149	0.000521176
TMEM249	1.18706	0.787812	5.92992	0.0148859	0.0379724
TMEM45A	1.18814	6.31186	67.8562	1.75866e-16	4.21596e-15
PIK3CD	1.18949	3.25009	33.2306	8.18522e-09	8.11814e-08
STK17A	1.18991	4.07164	54.8194	1.32131e-13	2.44656e-12
PLEC	1.19002	7.23441	75.8448	3.06858e-18	8.35136e-17
LINC01711	1.19033	2.4915	29.9467	4.44096e-08	3.9283e-07
EDEM2	1.19093	3.16131	28.5545	9.11e-08	7.65785e-07
DHRS7	1.1919	6.01805	75.9007	2.98291e-18	8.16298e-17
DUSP5	1.19209	2.10294	18.3172	1.87013e-05	0.000103574
NA..115	1.19209	3.95996	36.953	1.21012e-09	1.3752e-08
CERS1	1.19224	1.38761	13.4507	0.00024491	0.0010438
RPS26P21	1.19495	0.446835	6.54127	0.01054	0.0282719
PABPC1L	1.19894	3.67552	33.9898	5.54013e-09	5.61825e-08
KCNMA1	1.19904	3.92942	62.8672	2.21128e-15	4.80573e-14
ZNF790.AS1	1.19932	0.521937	7.06063	0.00787963	0.0220083
MBL1P	1.19945	1.9239	14.8881	0.00011408	0.000525031
TTYH2	1.19957	3.73331	47.6338	5.13755e-12	7.90928e-11
CEACAM19	1.2029	2.13501	22.3922	2.22277e-06	1.47528e-05
YBX3	1.20389	8.53504	122.357	1.92835e-28	1.02893e-26
WWC1	1.20415	4.60651	69.4599	7.79857e-17	1.93173e-15
CD274	1.20554	1.23154	11.3692	0.000746706	0.0028121
MIR22HG	1.20574	3.90365	59.3696	1.30669e-14	2.66111e-13
ZNF404	1.20585	2.81671	30.4719	3.38734e-08	3.05991e-07
SPHK1	1.2076	2.15478	22.8555	1.74648e-06	1.18127e-05
RP2	1.20767	4.20342	62.4656	2.71146e-15	5.81635e-14
MT.TQ	1.2087	3.92215	41.9614	9.30953e-11	1.22538e-09
NA..75	1.20884	2.43336	24.172	8.81029e-07	6.31482e-06
COL4A1	1.20902	7.10263	95.6933	1.34136e-22	4.9922e-21
HMGCS1	1.20946	7.80591	108.447	2.14503e-25	9.47567e-24
JAG1	1.20991	4.72952	60.695	6.66399e-15	1.38945e-13
PCDH17	1.21305	3.63905	47.0304	6.98953e-12	1.04998e-10
FAM214B	1.21413	3.40409	42.5262	6.97433e-11	9.28684e-10
NA..2660	1.2145	1.36356	12.759	0.000354307	0.00144866
AC008443.5	1.21471	2.44738	23.9568	9.85202e-07	6.99748e-06
OSBPL7	1.21499	2.31337	23.0109	1.61089e-06	1.09554e-05
CREB5	1.21507	5.9891	107.16	4.10742e-25	1.77826e-23
ZHX3	1.21511	2.50117	25.2608	5.00784e-07	3.74067e-06
LINC01910	1.21656	1.29611	9.13803	0.00250351	0.00817497
ELL2	1.21666	3.58422	32.7065	1.0718e-08	1.04629e-07
SFRP4	1.21716	0.789666	7.63989	0.00570915	0.0167409
MAP3K14	1.21797	2.1616	23.6801	1.13752e-06	7.96906e-06
THRB	1.22131	1.62022	14.7791	0.000120868	0.000552289
EOGT	1.22141	4.27062	54.8642	1.29151e-13	2.39436e-12
AC107954.1	1.22147	0.843485	8.27356	0.00402265	0.0124295
ZNF530	1.22181	0.958108	11.3041	0.000773371	0.00289931
S100A6	1.22525	7.14921	89.5401	3.00483e-21	1.02364e-19
SRPX2	1.22534	3.87476	39.1191	3.98718e-10	4.83758e-09
CYR61	1.22649	8.15885	59.9027	9.96629e-15	2.04364e-13
AL390728.4	1.22658	2.58283	13.9277	0.000189974	0.000829369
NA..20	1.2268	3.77242	57.0244	4.30429e-14	8.31102e-13
BLZF1	1.22768	3.72764	54.732	1.38136e-13	2.55139e-12
AL031587.6	1.22789	3.44619	45.0666	1.90449e-11	2.70793e-10
LINC00941	1.22847	1.5875	14.3075	0.000155241	0.000691939
APLP1	1.22904	6.53279	100.51	1.17822e-23	4.59166e-22
RHBDF2	1.23052	4.9289	68.8374	1.06923e-16	2.60945e-15
GARNL3	1.23155	1.97156	20.2058	6.95425e-06	4.21531e-05
AC005670.1	1.23181	0.137385	5.39912	0.0201469	0.0488162
AFAP1	1.23182	2.12378	23.3443	1.35445e-06	9.29629e-06
CAVIN1	1.23344	7.82334	123.913	8.8014e-29	4.7995e-27
TMEM159	1.23489	3.14948	39.0537	4.12297e-10	4.99013e-09
CITED2	1.23521	3.26359	36.9702	1.19952e-09	1.36523e-08
RGL1	1.23673	2.69566	24.7436	6.54859e-07	4.79768e-06
NA..3383	1.23825	0.316975	6.00863	0.0142361	0.0365213
HMOX2	1.23887	4.36138	63.3929	1.6933e-15	3.72351e-14
AL121899.1	1.23939	1.59918	16.5994	4.61648e-05	0.000234478
UBR5.AS1	1.24115	1.79405	12.5105	0.000404679	0.00162823
AC096536.1	1.24144	0.314846	6.04497	0.013946	0.0358945
TNFSF9	1.24247	3.41187	43.1251	5.13505e-11	6.92441e-10
SERPINE2	1.24314	8.04971	91.5856	1.06868e-21	3.7346e-20
GEM	1.24386	0.865968	7.11557	0.00764172	0.0214524
PDZD2	1.24401	1.82176	18.7834	1.46439e-05	8.30488e-05
MT.TI	1.24486	4.01185	50.4922	1.1964e-12	1.97241e-11
C19orf38	1.24616	0.473212	6.90917	0.00857548	0.023672
HLA.DQB1	1.24622	2.98796	37.6388	8.51335e-10	9.90143e-09
SLC12A4	1.24631	3.93418	49.6611	1.82731e-12	2.96009e-11
LBX2.AS1	1.24703	2.21293	19.9865	7.79928e-06	4.66711e-05
AL117335.1	1.24724	0.546433	6.61737	0.0100989	0.0272112
IFIT2	1.24934	0.683459	8.74967	0.00309659	0.00988186
GCNT2	1.24941	1.69868	18.1112	2.08376e-05	0.000114006
HSPA12A	1.24994	3.62413	54.9582	1.23121e-13	2.294e-12
AC009237.3	1.25043	3.33581	29.4483	5.74269e-08	4.97912e-07
BTG2	1.25153	4.06449	58.874	1.68095e-14	3.39082e-13
PARD6G	1.2519	4.57782	44.6835	2.31602e-11	3.26193e-10
TPM2	1.25229	6.8729	82.3233	1.15555e-19	3.54694e-18
PVT1	1.25325	5.61087	54.5065	1.54937e-13	2.8336e-12
AL133384.2	1.25344	0.683168	7.29079	0.00693089	0.0197248
PPP1R3C	1.25459	1.98878	23.2306	1.43691e-06	9.84412e-06
NA..5717	1.25606	0.974996	9.60059	0.00194515	0.00655888
TRIM35	1.25739	3.01125	29.9726	4.38188e-08	3.88292e-07
GBP3	1.25869	2.67646	35.7186	2.27972e-09	2.47183e-08
GABRA5	1.25912	2.60562	32.2493	1.35603e-08	1.29957e-07
SRGAP1	1.25932	4.8385	87.6186	7.9373e-21	2.65534e-19
NA..124	1.25989	3.2873	31.2608	2.25592e-08	2.09768e-07
GOLGA8B	1.26	3.93999	56.2824	6.27734e-14	1.20117e-12
TUBB6	1.26217	7.63269	105.719	8.49613e-25	3.59324e-23
MAFF	1.26233	2.974	37.2636	1.03193e-09	1.18629e-08
CALCOCO1	1.26287	3.46078	47.9993	4.26375e-12	6.62573e-11
UPF3AP3	1.26288	1.761	14.1805	0.000166082	0.000735412
STRIP2	1.2635	2.54329	31.8481	1.66713e-08	1.57279e-07
FLJ20021	1.26437	1.9484	22.7423	1.85248e-06	1.24618e-05
NOP14.AS1	1.26555	1.74129	17.8338	2.41069e-05	0.000129888
MGAT5B	1.2669	2.56382	28.9888	7.27972e-08	6.21406e-07
TSPAN5	1.26717	6.37607	92.8502	5.64065e-22	1.99934e-20
EGFR	1.2684	4.46994	76.9414	1.7611e-18	4.90047e-17
BACH2	1.27344	2.30227	25.9072	3.5824e-07	2.74055e-06
SCN8A	1.27508	3.97359	58.6228	1.9099e-14	3.8216e-13
KITLG	1.2765	4.0938	36.7042	1.37483e-09	1.54819e-08
NA..375	1.27698	3.10054	28.1383	1.12951e-07	9.3886e-07
NA..280	1.2785	3.7773	58.3525	2.19122e-14	4.34943e-13
DUSP10	1.27854	2.06379	21.3556	3.81499e-06	2.43124e-05
ASPHD1	1.27962	3.13993	36.9077	1.23858e-09	1.40325e-08
AC000123.3	1.28197	0.424069	5.43138	0.019778	0.0480632
ADAMTS12	1.28233	4.55569	69.0766	9.47122e-17	2.32287e-15
DLC1	1.28243	5.15288	82.9305	8.49917e-20	2.65256e-18
LINC.PINT	1.28319	1.14224	12.5491	0.000396394	0.00159987
LHFPL5	1.28348	0.639569	7.64348	0.00569778	0.0167237
ABCA3	1.28364	1.27851	14.3215	0.000154093	0.00068785
NA..11	1.28447	1.18769	12.9751	0.000315666	0.00130755
GS1.124K5.4	1.28614	1.09348	13.5523	0.000232003	0.000994195
NA..380	1.28615	1.04614	12.9843	0.000314121	0.00130187
HAP1	1.28708	0.826027	10.3216	0.0013148	0.00465591
ADAMTS8	1.28738	1.54892	16.181	5.757e-05	0.000285396
DDB2	1.28928	4.80445	86.7349	1.24087e-20	4.08691e-19
TCEA1P4	1.28937	0.99399	10.159	0.00143598	0.00502055
FAM155A.IT1	1.29097	0.941944	10.3048	0.00132681	0.00469621
RNY4P34	1.29245	0.639731	6.32632	0.0118959	0.0312776
AC009812.1	1.2933	0.638483	7.82926	0.00514071	0.0153305
AL392046.1	1.29429	0.424092	7.78774	0.0052602	0.0156347
NA..191	1.29584	3.29249	35.8691	2.11032e-09	2.30417e-08
CHST3	1.29778	4.36008	64.15	1.15298e-15	2.56567e-14
SLC22A4	1.29783	0.343529	6.91282	0.00855798	0.0236318
GPR37	1.30044	2.24174	27.0838	1.9482e-07	1.56097e-06
AL683807.2	1.30076	0.170163	6.06265	0.013807	0.035623
MFGE8	1.30077	6.9926	57.2398	3.85781e-14	7.51717e-13
RHOJ	1.30094	0.167978	5.62423	0.0177138	0.0438705
PCDH7	1.30101	5.08834	90.2358	2.11402e-21	7.25148e-20
GAS6.AS1	1.30221	3.75546	53.2845	2.88577e-13	5.13267e-12
TMEM173	1.30232	1.63279	18.3067	1.88041e-05	0.000103988
KDM4B	1.30308	4.42117	84.2526	4.35428e-20	1.38805e-18
NFKBIZ	1.30348	4.3752	46.4494	9.40166e-12	1.39128e-10
ULBP2	1.30422	3.13055	31.2916	2.22034e-08	2.06718e-07
SDC1	1.30498	6.62355	112.489	2.7919e-26	1.34508e-24
ZSWIM6	1.30588	6.01525	98.3193	3.56081e-23	1.36272e-21
ZBTB38	1.3069	5.92954	121.137	3.56635e-28	1.8827e-26
AC026785.3	1.30694	1.56399	15.9386	6.5432e-05	0.000320213
AC018816.1	1.30814	1.33277	15.3344	9.00599e-05	0.000426574
TMEM175	1.30845	1.84544	13.6056	0.000225513	0.000969172
NR2F2.AS1	1.3094	1.66684	17.467	2.92343e-05	0.000154494
CDIP1	1.30945	4.38059	82.8592	8.81111e-20	2.73844e-18
ITPR1.AS1	1.31034	0.169159	5.64973	0.0174581	0.0433525
AC092902.2	1.31165	2.6836	32.9433	9.48875e-09	9.32403e-08
MTND1P23	1.31267	2.28639	20.0345	7.60558e-06	4.56918e-05
RAC2	1.31276	2.09993	23.5496	1.21735e-06	8.48842e-06
SORCS3	1.31513	1.10938	13.6567	0.000219458	0.000945608
SGSH	1.316	2.48279	30.294	3.71264e-08	3.33367e-07
MYOM3	1.31774	1.20605	12.8618	0.000335355	0.00138027
TARSL2	1.31794	3.56216	52.9323	3.45251e-13	6.07265e-12
ATP13A3	1.31922	7.194	108.249	2.37017e-25	1.03779e-23
DGKD	1.31949	5.40122	113.602	1.59297e-26	7.82657e-25
APOL1	1.31971	5.9474	103.469	2.6448e-24	1.08168e-22
KLF6	1.32009	4.98148	90.919	1.49672e-21	5.19386e-20
NA..4874	1.32063	1.54181	14.5367	0.000137452	0.000620642
SLC46A3	1.32194	3.49323	55.0882	1.15243e-13	2.15802e-12
MYC	1.32198	3.78561	57.2238	3.88935e-14	7.56873e-13
NA..428	1.32215	0.961304	10.0089	0.00155786	0.00539222
LINC02474	1.32662	1.05944	9.68816	0.00185459	0.00629488
NA..167	1.3269	6.17625	92.7334	5.98338e-22	2.11579e-20
KCNQ5	1.32842	2.9689	35.691	2.31226e-09	2.50347e-08
DUSP14	1.32856	5.27015	84.9032	3.1333e-20	1.00529e-18
AL359220.1	1.32915	1.52688	12.4913	0.000408842	0.00164276
LINC02327	1.32935	2.71861	36.2641	1.72308e-09	1.90887e-08
PLEKHG4	1.33271	4.02	60.6124	6.94963e-15	1.44698e-13
PHKG1	1.33299	0.59497	6.78268	0.00920467	0.0251108
ACSS2	1.33392	1.78576	20.7983	5.10275e-06	3.18777e-05
DGKQ	1.33591	1.78222	22.4179	2.19322e-06	1.45696e-05
SCG2	1.33711	0.594431	9.211	0.00240566	0.00789703
CATSPER1	1.33761	0.448686	7.42045	0.00644865	0.0185474
SLFN5	1.34683	5.2663	96.0618	1.11352e-22	4.17556e-21
TJP2	1.34732	4.35583	67.4388	2.17335e-16	5.17675e-15
LIF	1.34753	2.23365	17.2051	3.35541e-05	0.00017436
STK19	1.34986	0.449842	7.89446	0.00495864	0.014853
PSTPIP2	1.35115	3.54965	44.4529	2.60553e-11	3.65585e-10
ZBTB47	1.35171	0.370064	7.83684	0.00511919	0.0152816
CERS5	1.35178	4.67812	82.4243	1.09797e-19	3.38417e-18
NA..876	1.35235	0.371082	7.33578	0.00675953	0.0192961
TP53TG3D	1.35329	0.288546	6.7988	0.00912194	0.0249308
PLAC1	1.36103	1.44263	15.4009	8.69484e-05	0.000413547
SPAG1	1.36243	4.58051	65.6548	5.37238e-16	1.23044e-14
NONOP2	1.36361	0.200932	6.49983	0.0107885	0.0288138
FGF5	1.36387	1.27833	15.6211	7.73845e-05	0.000372582
HMGA1P4	1.36492	0.200116	6.50219	0.0107742	0.0287808
RUBCNL	1.36556	0.199888	6.01325	0.0141988	0.0364382
AL365181.3	1.36596	3.76768	40.5294	1.93682e-10	2.4332e-09
MAT1A	1.36853	0.749198	9.8996	0.00165314	0.00567844
KCNK6	1.36975	3.23205	45.3564	1.64254e-11	2.36484e-10
TRPM8	1.37093	0.746086	11.0241	0.000899345	0.00330745
TRIB1	1.37228	4.15414	78.3955	8.4345e-19	2.40545e-17
AC115284.2	1.37379	0.105719	6.16923	0.0129991	0.0337904
AF117829.1	1.37435	2.74592	40.973	1.54345e-10	1.96893e-09
P3H2	1.37465	3.98277	60.2107	8.52293e-15	1.7525e-13
AC009955.3	1.37628	0.106113	6.32077	0.0119332	0.0313646
ATP8A2	1.37662	3.52997	63.8665	1.33141e-15	2.94076e-14
TLR4	1.37822	3.05139	41.0618	1.47488e-10	1.88307e-09
TMEM198	1.37919	0.683194	10.3688	0.00128161	0.00455085
AC073365.1	1.38022	3.71791	58.6308	1.90217e-14	3.81125e-13
RPL23P4	1.38058	2.48438	28.4737	9.49796e-08	7.96598e-07
TAP1	1.38622	5.25401	80.7444	2.56879e-19	7.61784e-18
DHRS1	1.38748	3.74779	60.3251	8.04156e-15	1.6581e-13
USP20	1.38751	0.546399	8.51261	0.00352695	0.0110572
ECM1	1.38803	4.27611	67.8619	1.75354e-16	4.21049e-15
ALPL	1.39059	0.00645863	5.59829	0.017978	0.0443993
NEK10	1.39458	2.94168	40.0032	2.53549e-10	3.15074e-09
FCHSD1	1.39563	2.7842	30.225	3.84716e-08	3.44394e-07
KLHL21	1.39577	3.41316	43.1156	5.15986e-11	6.95156e-10
AL358472.3	1.39715	0.472802	8.41318	0.00372511	0.0116162
IKBIP	1.39777	7.39873	153.376	3.17081e-35	2.53784e-33
ZNF665	1.39797	1.15734	15.039	0.000105311	0.000488859
LPIN3	1.39888	2.89108	46.9251	7.37539e-12	1.1046e-10
CRIM1	1.40051	7.41817	80.6485	2.69656e-19	7.96503e-18
OPTN	1.40121	5.13287	112.038	3.50533e-26	1.67256e-24
AC005840.3	1.40304	0.766931	10.1657	0.0014308	0.00500714
CYLD	1.40329	4.95521	105.779	8.24391e-25	3.4965e-23
AC022167.2	1.40597	0.397034	7.87485	0.00501271	0.0149938
IL1RAP	1.40821	4.80446	100.957	9.3985e-24	3.6917e-22
SFN	1.40929	7.71115	122.832	1.51801e-28	8.1879e-27
IL13RA2	1.41093	1.4396	16.2745	5.4795e-05	0.000272821
TLDC1	1.4177	3.14747	53.045	3.25993e-13	5.75007e-12
WFDC2	1.41891	0.704695	9.82555	0.00172104	0.00589399
NA..219	1.41941	0.231788	7.1029	0.00769594	0.0215762
CCDC63	1.41946	1.44015	21.1158	4.32358e-06	2.73197e-05
NA..4368	1.41992	1.74228	22.5362	2.06216e-06	1.37789e-05
SYNC	1.42023	2.40587	35.7649	2.22624e-09	2.42267e-08
CENPT	1.42071	1.63613	16.3267	5.33073e-05	0.000266036
TNFAIP1	1.42223	4.5493	70.7643	4.02566e-17	1.0227e-15
STARD13	1.4226	3.82766	60.4108	7.69904e-15	1.5941e-13
AP001094.2	1.42264	1.20355	10.7479	0.00104397	0.0037821
DDAH1	1.42269	4.16351	85.2266	2.66057e-20	8.59173e-19
CAV2	1.42333	3.8225	75.858	3.0482e-18	8.31108e-17
ADPRHL1	1.42363	0.639642	11.6122	0.000655205	0.00250168
FLJ36000	1.42392	1.8428	18.6773	1.54813e-05	8.75977e-05
KRT17	1.42747	7.02777	137.061	1.16929e-31	7.73653e-30
NOXRED1	1.42784	0.229895	6.92187	0.0085148	0.0235263
NA..142	1.43197	4.35097	66.6706	3.2089e-16	7.49935e-15
AC006213.2	1.43401	2.57913	38.0224	6.99353e-10	8.21078e-09
CRYM.AS1	1.43432	0.905302	10.2831	0.00134256	0.00474631
AC244153.1	1.43465	0.846526	12.1535	0.00048997	0.00193223
BCL2L1	1.43548	5.20035	85.4856	2.33392e-20	7.58625e-19
SLC31A2	1.43548	2.8076	34.9166	3.44136e-09	3.63087e-08
CORO1C	1.43667	5.57031	109.823	1.07154e-25	4.89807e-24
SESN1	1.43795	3.87985	75.8752	3.02171e-18	8.25398e-17
NTNG1	1.43836	2.54256	25.7916	3.80349e-07	2.89629e-06
EEA1	1.43863	6.86738	135.891	2.1083e-31	1.36462e-29
RCAN2	1.43932	2.13505	33.9331	5.70386e-09	5.77642e-08
TIMP1	1.43994	8.00284	112.941	2.22311e-26	1.07803e-24
IFFO1	1.4401	0.42278	7.61705	0.00578189	0.0168973
FOSL1	1.44147	1.50287	16.8191	4.11174e-05	0.000210566
INPP1	1.44321	3.58174	58.6555	1.87844e-14	3.76878e-13
CCT6P1	1.44324	0.139199	7.26059	0.00704842	0.0200211
BMS1P10	1.44332	2.02873	27.3254	1.71937e-07	1.38809e-06
MXD1	1.44402	1.8535	25.168	5.25469e-07	3.90937e-06
CFHR3	1.44407	0.139175	7.02039	0.00805865	0.0224661
LINC01410	1.44557	2.89743	46.0647	1.14411e-11	1.67642e-10
ITGA6	1.44651	7.66581	156.832	5.57144e-36	4.68599e-34
TGFB2	1.44744	7.8028	123.819	9.23006e-29	5.01489e-27
ABTB2	1.44982	0.570274	8.25158	0.00407166	0.0125548
AC117402.1	1.45027	4.12708	60.3394	7.98339e-15	1.65068e-13
TRIM58	1.45098	3.18454	43.9875	3.30487e-11	4.58524e-10
C7orf61	1.45257	0.137821	6.53085	0.0106019	0.0284073
LINC01534	1.45326	0.726201	12.2202	0.00047276	0.00187429
VLDLR.AS1	1.45433	1.65763	22.1954	2.46258e-06	1.62214e-05
THSD4	1.45696	0.660857	10.3682	0.00128208	0.00455085
LHX5	1.45718	0.0423692	6.31781	0.0119531	0.0314057
NA..4826	1.45772	0.423607	8.94354	0.00278453	0.00898814
AC112721.1	1.45872	0.920447	12.1599	0.000488268	0.00192603
FAM210B	1.45904	6.07219	139.834	2.89354e-32	1.94914e-30
ARHGAP29	1.45938	7.3431	171.062	4.33726e-39	4.36275e-37
SCHIP1	1.46316	1.58867	23.694	1.12933e-06	7.92284e-06
PIEZO1	1.46531	4.33571	51.2552	8.11045e-13	1.35969e-11
MCAM	1.46544	7.51459	121.11	3.61432e-28	1.90128e-26
BTBD19	1.46545	3.74384	43.7211	3.78663e-11	5.19076e-10
B3GALT5	1.46648	1.33424	16.4888	4.8938e-05	0.000246824
CPED1	1.46833	1.29392	16.3547	5.25269e-05	0.000262846
NEXN	1.47145	7.60635	109.699	1.14081e-25	5.19365e-24
CFL1P1	1.47167	0.0406696	6.36678	0.0116276	0.0306637
NA..3776	1.47171	0.344625	7.84796	0.0050878	0.0152031
SLC4A11	1.47252	2.60473	40.754	1.72648e-10	2.18184e-09
STOM	1.47259	4.8091	101.227	8.20403e-24	3.2656e-22
SESN2	1.47476	5.35927	131.644	1.79036e-30	1.09234e-28
PICSAR	1.47626	3.07608	45.8904	1.2506e-11	1.82348e-10
GALNT18	1.4769	3.20941	49.7937	1.70794e-12	2.77578e-11
TNNT2	1.4782	0.592775	11.5449	0.00067936	0.00258462
ADORA2B	1.47862	4.08491	79.554	4.69225e-19	1.367e-17
DENND2C	1.47947	3.11878	57.0892	4.1649e-14	8.07329e-13
SLC35G2	1.48055	3.11846	44.2635	2.87014e-11	4.00448e-10
DOCK8	1.48068	0.807949	14.3208	0.000154155	0.000687923
RTL5	1.4813	2.77333	45.7592	1.33718e-11	1.9459e-10
AC145285.2	1.48262	0.258599	6.81227	0.00905338	0.0247844
DACT3	1.4827	2.33328	32.648	1.10454e-08	1.07543e-07
NA..4455	1.48305	3.90042	77.4204	1.38179e-18	3.88128e-17
AP004782.1	1.48425	0.258092	7.83058	0.00513696	0.0153285
PRDM16	1.48587	1.44168	21.1011	4.35673e-06	2.74825e-05
AC010733.1	1.48619	0.343403	7.95618	0.00479235	0.0144333
TRIM49B	1.48673	0.259527	7.73778	0.00540772	0.0160145
AL159153.1	1.48813	0.25898	8.57817	0.00340216	0.0107056
CTSS	1.48865	0.259588	8.42706	0.00369678	0.0115351
OSBPL3	1.49032	4.3496	90.28	2.06734e-21	7.12266e-20
DUSP11	1.4906	4.22271	72.8344	1.40996e-17	3.68247e-16
LINC01484	1.49192	0.747266	13.3703	0.000255637	0.00108578
VWCE	1.49389	0.746082	12.7861	0.000349213	0.00142979
CDC42EP5	1.49417	0.941711	15.3427	8.96672e-05	0.000424849
ACP7	1.49454	0.260959	7.24288	0.00711829	0.0202078
CASC8	1.49456	2.18685	31.7329	1.769e-08	1.66467e-07
ABCA4	1.49544	0.258316	8.17531	0.00424645	0.0129942
AC011352.1	1.49589	2.43185	40.7304	1.74748e-10	2.20464e-09
STXBP6	1.49683	1.56593	15.655	7.60116e-05	0.000366565
ZNF469	1.50285	0.682485	11.0228	0.000899999	0.00330822
MITF	1.50291	3.53247	58.398	2.14104e-14	4.2555e-13
DYRK3	1.50536	2.42046	39.6754	2.99876e-10	3.69252e-09
NA..246	1.50537	0.682114	12.5749	0.000390972	0.00158034
ATG16L2	1.50661	2.69908	51.7933	6.16604e-13	1.05389e-11
AC016717.2	1.50873	2.71927	35.9571	2.01712e-09	2.20963e-08
EPHA1.AS1	1.51002	2.04659	33.3593	7.66106e-09	7.62877e-08
PDE2A	1.51012	3.08098	55.0571	1.1708e-13	2.18966e-12
ANKRD20A5P	1.51065	5.46728	84.885	3.16234e-20	1.01242e-18
TSPEAR.AS2	1.51074	0.167981	7.66375	0.00563413	0.0165729
AL157394.1	1.51091	0.61949	10.7854	0.00102306	0.00371381
LAT2	1.51141	2.10342	34.9678	3.35211e-09	3.55434e-08
LINC00638	1.51192	-0.176583	5.46829	0.0193646	0.0472437
ARHGAP27	1.51218	2.80982	51.5998	6.80474e-13	1.15378e-11
PHACTR1	1.51465	0.826274	13.6201	0.000223783	0.000962847
FOLR1	1.51641	5.41358	110.914	6.18018e-26	2.87514e-24
CTPS1	1.51715	5.41078	133.565	6.80174e-31	4.29057e-29
EPAS1	1.51812	3.35599	66.8568	2.91966e-16	6.85567e-15
PHLDA2	1.52226	5.5973	140.806	1.77361e-32	1.21118e-30
LINC02263	1.52459	0.828633	11.2264	0.000806429	0.00300809
AL078590.3	1.52517	2.08763	28.2616	1.05975e-07	8.82849e-07
PTPRM	1.52659	5.17769	131.95	1.53437e-30	9.40007e-29
BST2	1.52871	1.86256	20.7562	5.21637e-06	3.2533e-05
GNGT2	1.52896	1.53641	18.5054	1.69428e-05	9.48223e-05
LINC01480	1.52933	0.370319	9.50243	0.002052	0.00687245
CSPG4	1.52966	5.27057	127.47	1.466e-29	8.49196e-28
CHRNB4	1.53009	0.168942	6.79138	0.00915992	0.0250147
ENPP2	1.53279	1.07981	16.1506	5.85008e-05	0.000289336
TUFT1	1.533	5.45695	140.117	2.50957e-32	1.69818e-30
HSD17B7P2	1.53335	2.02674	28.1651	1.11395e-07	9.26965e-07
FAM83H	1.53413	4.40695	101.161	8.47975e-24	3.34849e-22
LINC02454	1.5345	0.0750115	6.87283	0.00875162	0.0240779
DISC1FP1	1.53468	0.0754405	7.21894	0.00721383	0.0204323
KCNB1	1.53486	2.79121	48.8619	2.74636e-12	4.37273e-11
TIGAR	1.53572	5.85031	143.858	3.81612e-33	2.74447e-31
FCRLB	1.53672	0.074421	7.29695	0.00690718	0.0196723
ARVCF	1.53999	4.26459	78.1848	9.38373e-19	2.66595e-17
AC089983.1	1.54155	1.99771	25.2775	4.9646e-07	3.71024e-06
GJB3	1.54179	2.3924	38.0939	6.74217e-10	7.94072e-09
PFKFB4	1.54589	1.25047	18.9379	1.35045e-05	7.7116e-05
IQANK1	1.54704	1.78558	25.9173	3.56363e-07	2.7286e-06
SFMBT2	1.54733	1.94942	26.3506	2.84733e-07	2.22979e-06
NA..338	1.54776	7.65034	69.0677	9.51413e-17	2.32955e-15
ATG4A	1.54833	1.38512	15.3791	8.79545e-05	0.000417531
AL354811.1	1.54996	0.286392	9.10225	0.00255295	0.00832729
TRANK1	1.55	2.04556	32.3737	1.27194e-08	1.22559e-07
AP000941.1	1.55465	0.476431	10.606	0.00112718	0.00405715
NIPAL3	1.55654	5.07967	132.132	1.39973e-30	8.64637e-29
BDNF	1.55695	3.76951	83.3079	7.02183e-20	2.20536e-18
AC007613.1	1.55703	0.475601	10.6246	0.00111596	0.00402161
MMP19	1.55743	2.38442	44.1045	3.11307e-11	4.33935e-10
AP005233.2	1.55793	1.98069	24.9334	5.93451e-07	4.37795e-06
AC060766.4	1.55826	0.472915	9.61844	0.00192633	0.0065021
GULP1	1.56023	3.62333	60.4608	7.50586e-15	1.55843e-13
AC022034.2	1.56083	0.847327	11.7946	0.000594015	0.00229043
APCDD1L.AS1	1.56196	3.16305	65.4903	5.83993e-16	1.33138e-14
KCNH6	1.56217	-0.0268831	6.23057	0.0125563	0.0327882
ZNF296	1.5631	0.398536	9.37231	0.00220288	0.00732016
AC009502.1	1.5644	2.9038	19.1388	1.21548e-05	7.01348e-05
RNU6.310P	1.5649	-0.0271241	6.92433	0.00850307	0.0234993
SLC15A3	1.56496	1.09385	17.2303	3.31117e-05	0.000172475
TSPAN11	1.56862	0.923204	15.2393	9.47131e-05	0.000445636
ZBBX	1.56925	0.923716	15.0225	0.000106239	0.000492396
DHRS3	1.56938	1.57908	24.3306	8.11378e-07	5.85222e-06
OR51B4	1.57036	1.0473	18.1019	2.09394e-05	0.000114478
GABRA1	1.57213	0.200749	8.49205	0.00356701	0.01117
PLAGL1	1.57427	4.66794	111.358	4.93868e-26	2.31931e-24
NA..1647	1.57544	2.64342	36.3521	1.64701e-09	1.83939e-08
ZNF283	1.5755	4.70095	102.892	3.5395e-24	1.43576e-22
EPHA2	1.57635	5.04725	47.6123	5.19407e-12	7.97978e-11
CLTB	1.57681	5.38306	138.845	4.76108e-32	3.1784e-30
HILS1	1.57893	-0.0285699	6.2269	0.0125824	0.0328334
AC025048.4	1.5831	0.396518	8.77142	0.00305987	0.00977726
TMEM63B	1.5834	4.94376	71.2977	3.07197e-17	7.83089e-16
SCN3B	1.58473	1.70134	29.5387	5.48112e-08	4.77457e-07
SLC22A5	1.58774	3.82473	85.7776	2.01353e-20	6.55916e-19
ZNF529.AS1	1.58791	0.394737	8.67169	0.00323191	0.0102526
PLK3	1.5906	2.75734	51.6171	6.74499e-13	1.14496e-11
NA..308	1.59196	0.992532	14.7132	0.000125169	0.000569672
ZNF699	1.59465	1.38015	20.0547	7.52576e-06	4.53037e-05
INPP5D	1.59475	2.034	32.4146	1.24549e-08	1.20166e-07
ZNF841	1.5981	1.17423	16.4832	4.90843e-05	0.000247282
ANKLE1	1.59823	0.108185	8.00271	0.00467075	0.0141213
NFASC	1.59842	4.34237	119.031	1.0309e-27	5.32882e-26
TSPAN10	1.59943	3.63575	62.6664	2.44858e-15	5.2829e-14
CLIC3	1.6	0.661412	13.5917	0.000227188	0.000975527
CRYBG2	1.60106	0.661266	13.998	0.000183007	0.000802954
COBLL1	1.6033	4.82785	132.095	1.42662e-30	8.77607e-29
ANXA4	1.60666	4.54985	115.684	5.57526e-27	2.7852e-25
AP006284.1	1.60691	0.105412	7.71308	0.00548222	0.0162061
MEGF11	1.60732	1.68132	30.6339	3.11606e-08	2.83031e-07
FBN1	1.60912	5.29223	130.428	3.30216e-30	1.97427e-28
MYOF	1.60987	3.97281	100.531	1.16584e-23	4.55533e-22
FADS3	1.60992	5.1692	116.939	2.96061e-27	1.50425e-25
RENBP	1.61088	0.10669	7.7652	0.00532623	0.0158149
GPRC5A	1.61231	7.43797	195.965	1.58599e-44	1.9513e-42
EHD1	1.61424	4.10163	79.126	5.82726e-19	1.67796e-17
CCND2	1.6143	8.6992	167.546	2.54208e-38	2.41044e-36
AC099494.2	1.61844	0.887819	15.19	9.72192e-05	0.000455556
XDH	1.62027	2.96985	55.1185	1.13476e-13	2.1276e-12
NOS3	1.62274	1.24904	15.1838	9.75355e-05	0.000456607
CFAP70	1.62283	1.01345	12.9242	0.000324363	0.00134059
KCNQ5.IT1	1.62345	2.55797	22.4403	2.16777e-06	1.4407e-05
AL161431.1	1.62417	1.83154	31.1461	2.39324e-08	2.21844e-07
AL355916.1	1.62527	2.02615	36.047	1.92614e-09	2.11933e-08
EXTL3.AS1	1.62593	1.03266	14.0955	0.000173758	0.000766666
IL31RA	1.62903	4.34138	97.4494	5.52499e-23	2.09289e-21
AC027288.2	1.63271	0.231604	9.55606	0.0019929	0.00669803
SAMD4A	1.63732	5.17118	142.876	6.25552e-33	4.43457e-31
CES2	1.64057	4.71834	135.933	2.06367e-31	1.34156e-29
TM7SF3	1.64167	8.16372	128.281	9.74398e-30	5.66635e-28
TUBA4A	1.64321	4.39226	109.064	1.57128e-25	7.08839e-24
RRP12	1.6483	2.83323	61.2369	5.06041e-15	1.06105e-13
TM4SF19	1.64994	3.13337	56.3669	6.01341e-14	1.15214e-12
HLA.L	1.65273	1.30507	18.6364	1.58172e-05	8.91258e-05
AC114811.2	1.65718	0.979905	17.7012	2.58457e-05	0.000138057
SYTL5	1.65839	1.50646	29.2631	6.31885e-08	5.4587e-07
SPAG4	1.65873	0.979857	17.9089	2.3173e-05	0.000125446
PLEKHM1P1	1.65925	1.09681	18.4662	1.72943e-05	9.64995e-05
PROCR	1.66022	5.49584	128.462	8.89433e-30	5.21299e-28
MICALL1	1.66022	5.53438	147.142	7.30741e-34	5.43927e-32
GASAL1	1.66076	4.95922	108.544	2.04265e-25	9.07731e-24
AL590004.4	1.66101	5.23868	87.0204	1.07409e-20	3.56125e-19
KCNH8	1.66356	0.61772	15.0305	0.000105785	0.000490752
RBM24	1.66756	1.91368	26.0658	3.29973e-07	2.54129e-06
ZDHHC9	1.66761	5.79257	177.317	1.86753e-40	2.00014e-38
AL049775.1	1.66814	0.140746	8.51368	0.00352487	0.0110543
MR1	1.66977	3.88067	93.0404	5.12388e-22	1.82486e-20
COL12A1	1.67198	6.31445	138.378	6.02497e-32	4.00418e-30
SCG5	1.67343	1.27811	18.0016	2.20721e-05	0.000119966
ACYP2	1.67384	2.84888	57.248	3.84178e-14	7.49576e-13
FDXR	1.67459	5.1948	143.701	4.12924e-33	2.95539e-31
DOCK2	1.67519	0.449145	12.5698	0.000392024	0.00158374
LPAR2	1.67645	0.705546	15.1828	9.75873e-05	0.000456706
AC138028.6	1.67884	1.33409	18.315	1.87224e-05	0.00010363
RFTN1	1.68	3.82297	94.7913	2.11554e-22	7.77631e-21
AC087380.1	1.68046	3.95757	95.2789	1.65367e-22	6.10872e-21
KCTD11	1.68477	2.46969	40.8765	1.62155e-10	2.06149e-09
SOAT2	1.68859	0.260066	10.525	0.00117771	0.00421963
HSPD1P11	1.68952	1.95172	35.2782	2.85813e-09	3.06328e-08
AC007014.2	1.69077	0.549773	10.4288	0.00124067	0.00441652
MIR222HG	1.69214	3.89156	92.4568	6.88089e-22	2.42165e-20
NIPAL1	1.69364	4.59493	130.22	3.66707e-30	2.18367e-28
TP53INP1	1.69899	4.34432	106.589	5.47707e-25	2.33631e-23
SLC9A1	1.70438	3.71508	62.1711	3.14877e-15	6.68698e-14
MAST4	1.70724	4.79843	142.404	7.93453e-33	5.57176e-31
DYSF	1.71173	1.66879	32.0446	1.50675e-08	1.43421e-07
RIC3	1.71438	1.19095	22.376	2.24158e-06	1.48577e-05
AC120498.8	1.71553	1.19337	20.7924	5.11849e-06	3.19627e-05
BLCAP	1.71609	4.00239	121.402	3.12062e-28	1.65326e-26
PARP3	1.71768	3.58192	59.6655	1.12429e-14	2.29908e-13
METTL8	1.7192	4.34581	131.328	2.09863e-30	1.26487e-28
CHI3L2	1.72455	0.476489	11.3962	0.00073595	0.00277651
MICAL2	1.72684	4.98595	161.263	5.99249e-37	5.24766e-35
PPME1	1.72748	7.0533	195.423	2.08282e-44	2.54156e-42
GPNMB	1.72764	5.55643	151.002	1.04682e-34	8.11667e-33
LINC01998	1.72881	-0.38597	5.39515	0.0201927	0.0488796
AC011468.1	1.72893	0.170364	9.85981	0.00168928	0.00579188
AC104695.2	1.72996	0.170179	9.34486	0.00223611	0.00741326
TRAF1	1.73012	0.170357	10.2386	0.0013753	0.00484398
PICART1	1.73296	0.172183	8.62028	0.00332441	0.0104986
CATSPERG	1.73319	0.88621	19.4658	1.02417e-05	5.99118e-05
TRHDE	1.73346	3.46751	95.6503	1.37076e-22	5.08891e-21
TNFRSF9	1.73422	3.93833	83.8202	5.41881e-20	1.71638e-18
CPEB2	1.73499	2.02356	28.5299	9.22624e-08	7.74681e-07
BANK1	1.73683	1.26431	21.5862	3.38271e-06	2.17813e-05
SLC44A5	1.73932	1.41807	28.7923	8.05714e-08	6.81515e-07
CREG2	1.7412	1.83584	27.5945	1.49601e-07	1.22235e-06
EPG5	1.74289	4.89245	131.086	2.37089e-30	1.42321e-28
CD22	1.74304	0.663475	14.8056	0.000119183	0.000545765
ZNF542P	1.74492	1.49769	20.1701	7.08513e-06	4.28592e-05
ZNF280A	1.7456	0.289144	11.1708	0.000830943	0.00308639
EFNB1	1.7459	3.81586	86.508	1.39171e-20	4.5736e-19
PRSS8	1.7463	0.289442	11.7379	0.000612406	0.00235457
AC023157.3	1.74805	4.58993	112.027	3.5242e-26	1.67619e-24
AC016831.1	1.7484	1.37731	22.3799	2.23698e-06	1.48338e-05
RIMS2	1.74843	4.48332	107.511	3.43986e-25	1.50174e-23
GOLGA2P11	1.74863	1.32304	22.3873	2.22838e-06	1.47834e-05
FLRT2	1.74902	6.6525	222.456	2.63455e-50	4.08547e-48
LINC02055	1.75651	3.39657	80.1051	3.55009e-19	1.04036e-17
TCERG1L.AS1	1.75952	1.74942	27.692	1.42247e-07	1.16609e-06
ZMAT3	1.75992	6.83053	158.449	2.4693e-36	2.11267e-34
TGFBI	1.76551	6.00694	187.892	9.17449e-43	1.05062e-40
GNG4	1.7665	0.50003	14.7561	0.000122354	0.000558393
PDE4D	1.76795	0.499584	13.9973	0.000183077	0.000803024
SLCO1B1	1.76898	-0.0617447	8.30085	0.00396266	0.0122604
AC104184.1	1.76945	-0.0613623	7.87318	0.00501733	0.0150046
CCDC129	1.77006	0.596909	13.2969	0.000265839	0.00112494
AL512353.1	1.77123	-0.064157	8.10991	0.00440239	0.0133998
ZNF429	1.77153	0.594167	14.7833	0.000120599	0.000551229
NECTIN3.AS1	1.77281	0.595422	15.3053	9.14579e-05	0.000431959
CDA	1.77563	3.33553	72.2234	1.9216e-17	4.94074e-16
DRAM1	1.77587	5.09875	124.535	6.43406e-29	3.54755e-27
SYNE1	1.77797	6.07247	199.138	3.22116e-45	4.0297e-43
ARF4.AS1	1.7797	0.0755622	9.33961	0.00224253	0.007432
INHBA	1.78194	8.72679	194.176	3.89723e-44	4.71691e-42
AL356585.4	1.78381	0.0738928	9.18045	0.00244614	0.00800873
C6orf132	1.78835	1.29356	23.2894	1.39363e-06	9.56079e-06
NA..289	1.79035	0.200954	9.32553	0.00225983	0.00747769
PCAT1	1.79226	0.200626	11.3087	0.00077146	0.00289288
LINC01638	1.79298	2.20552	42.5653	6.8363e-11	9.12753e-10
EDA2R	1.79429	5.02212	171.005	4.46411e-39	4.46022e-37
AC008013.1	1.79888	0.199061	9.76263	0.00178095	0.00607678
AP000526.1	1.79943	0.424328	11.9504	0.000546367	0.00212814
LINC00973	1.8012	3.73622	93.834	3.43134e-22	1.24896e-20
VSTM1	1.80194	3.20189	76.5892	2.10489e-18	5.81364e-17
RNU6.301P	1.80403	1.7654	29.75	4.91498e-08	4.30915e-07
AL359697.1	1.80444	0.527776	13.014	0.000309165	0.00128562
IL11	1.80459	3.1476	67.6555	1.94713e-16	4.6528e-15
TNFRSF14	1.80498	0.619286	14.7945	0.000119888	0.000548653
PLEKHM1	1.80502	3.53683	81.5652	1.69576e-19	5.12065e-18
SNORD13	1.8069	5.94004	53.1358	3.11274e-13	5.51003e-12
MAP2K3	1.81177	5.05395	125.294	4.38973e-29	2.44756e-27
STPG1	1.8122	2.81943	72.718	1.49566e-17	3.89265e-16
SLCO1B3	1.81374	5.02185	125.677	3.61845e-29	2.03275e-27
CMBL	1.81392	4.59289	150.02	1.71616e-34	1.32375e-32
ANKRD13A	1.81683	3.47464	88.86	4.23758e-21	1.44029e-19
VGLL3	1.81766	3.69002	90.7796	1.60603e-21	5.56021e-20
CSF1	1.81919	2.82602	70.6503	4.26501e-17	1.08166e-15
RBFOX3	1.82241	4.6358	129.979	4.14149e-30	2.45635e-28
MYH16	1.82327	1.79006	35.9068	2.06987e-09	2.26241e-08
SDC4	1.82975	5.97014	128.43	9.03639e-30	5.27548e-28
THSD1	1.83614	1.57858	30.4924	3.35185e-08	3.03153e-07
GGT1	1.83632	1.07862	22.502	2.09927e-06	1.40017e-05
TFPI2	1.83668	4.53003	109.821	1.07259e-25	4.89807e-24
PLEKHF1	1.83959	1.37923	29.0901	6.90899e-08	5.92136e-07
RDH10	1.84085	5.30753	180.734	3.35006e-41	3.64032e-39
SP110	1.84245	4.98503	149.343	2.41317e-34	1.8329e-32
LINC01583	1.84451	3.14279	59.2704	1.37425e-14	2.79106e-13
MIR137HG	1.84452	0.549888	12.6232	0.000380985	0.00154669
AC087481.3	1.84509	-0.174635	7.82241	0.00516023	0.0153794
LAT	1.8471	0.956101	14.1497	0.000168825	0.000747299
TRNP1	1.84899	3.98475	126.15	2.85166e-29	1.61417e-27
AC005863.1	1.8505	0.343043	12.6259	0.000380438	0.0015449
MT.TA	1.85125	0.72869	17.3617	3.08996e-05	0.000161945
AC087392.1	1.85407	0.105626	10.3273	0.00131078	0.00464278
RRM2B	1.85434	6.43342	170.215	6.63925e-39	6.58923e-37
KIAA1211L	1.85768	1.33912	28.8975	7.63106e-08	6.48793e-07
KANK3	1.86056	1.16105	25.7749	3.83644e-07	2.9182e-06
AMIGO2	1.86082	8.51306	213.085	2.91666e-48	4.21556e-46
SYP	1.86629	2.50544	49.0674	2.47312e-12	3.95886e-11
GCNT1P3	1.86709	0.808023	18.144	2.04815e-05	0.000112264
TAGLN	1.86837	4.55431	143.959	3.62692e-33	2.62107e-31
LINC00346	1.87491	1.50877	34.4053	4.47512e-09	4.61045e-08
CCL20	1.877	1.74787	34.2611	4.81919e-09	4.9376e-08
RASGRF1	1.87706	3.91209	121.036	3.75276e-28	1.96716e-26
RNU1.106P	1.88091	0.573539	15.0952	0.000102224	0.000475864
KIRREL2	1.88112	1.11372	26.2717	2.96605e-07	2.31302e-06
CPNE4	1.88123	0.907205	20.5715	5.74451e-06	3.55734e-05
NEGR1	1.88241	5.15799	176.999	2.19133e-40	2.33017e-38
RND3	1.88269	6.09323	213.491	2.37805e-48	3.47078e-46
AFAP1L2	1.88554	0.830059	20.3835	6.33746e-06	3.87457e-05
AC245041.1	1.89003	0.371097	12.4113	0.000426738	0.00170546
S100A3	1.89215	0.573259	14.5703	0.000135027	0.000611357
AP001330.5	1.8939	0.571886	17.5526	2.79461e-05	0.000148108
AC126323.1	1.90483	0.25943	12.8546	0.000336652	0.00138412
NA..5701	1.90525	0.374122	12.3546	0.000439901	0.00175242
AC135048.1	1.90529	1.13292	25.2134	5.13253e-07	3.82422e-06
C7	1.91273	2.10751	47.4236	5.71911e-12	8.71447e-11
LINC01206	1.91558	0.139765	11.2967	0.000776444	0.00290937
TRIM22	1.91787	3.72595	110.432	7.88043e-26	3.63208e-24
PLLP	1.91925	0.848956	21.9613	2.78197e-06	1.81885e-05
SLC2A1.AS1	1.92042	2.46258	55.7914	8.05825e-14	1.52819e-12
NLRP3	1.92046	0.00896052	9.99494	0.00156971	0.00542942
HCLS1	1.9231	0.00631808	10.1502	0.00144284	0.00503885
ANKRD20A21P	1.92742	0.849906	19.5711	9.69229e-06	5.69637e-05
FLRT3	1.92789	3.63287	106.936	4.5967e-25	1.97778e-23
HBEGF	1.92957	5.44493	160.311	9.67545e-37	8.32592e-35
MICALCL	1.93027	3.07643	93.436	4.19559e-22	1.51234e-20
MET	1.94037	5.71838	232.521	1.68092e-52	2.81166e-50
SEMA3B	1.94562	4.14757	104.91	1.27785e-24	5.35806e-23
AC078993.1	1.94584	3.23397	74.4311	6.27918e-18	1.66925e-16
CXCL12	1.94707	2.19923	34.3868	4.51769e-09	4.64788e-08
ALOX5	1.94878	2.42469	46.7641	8.00665e-12	1.19314e-10
LAMP3	1.94879	2.38193	46.9735	7.19544e-12	1.07982e-10
AC007906.1	1.94985	0.397407	11.85	0.000576607	0.00223308
LAMC2	1.95246	6.99949	174.368	8.22629e-40	8.68544e-38
KCNK3	1.95354	0.867528	20.8149	5.0588e-06	3.16697e-05
GLIPR1	1.95485	5.90525	178.949	8.22142e-41	8.86901e-39
CDH13	1.95711	3.77672	111.661	4.23964e-26	2.00367e-24
RIN1	1.95835	2.49404	65.7921	5.01081e-16	1.1494e-14
AC147651.3	1.96338	0.616787	15.2049	9.64529e-05	0.000452535
FALEC	1.96822	-0.479121	5.93439	0.0148482	0.0378892
NA..8	1.97287	7.18213	293.219	9.88853e-66	2.45351e-63
RIMBP2	1.97305	0.618757	20.0783	7.43357e-06	4.48212e-05
PLB1	1.97495	0.958759	25.9704	3.4669e-07	2.65766e-06
LAMB3	1.97733	6.44879	127.214	1.66807e-29	9.62504e-28
COL27A1	1.97747	4.82676	181.903	1.86154e-41	2.0377e-39
RPL23AP82	1.98444	0.960819	18.0068	2.20117e-05	0.000119682
NA..4479	1.98569	2.828	85.9811	1.81663e-20	5.93074e-19
CYP1A1	1.99014	1.25606	22.9518	1.66118e-06	1.12717e-05
DCLK1	1.99347	2.62201	70.5294	4.53457e-17	1.14417e-15
IL15RA	1.99442	0.427083	14.8593	0.000115834	0.000532558
AC087741.1	1.99833	1.25227	30.664	3.06811e-08	2.78846e-07
MDM2	1.99866	7.6206	322.121	4.99848e-72	1.45906e-69
CHMP1B.AS1	2.00131	1.86912	48.6743	3.02194e-12	4.78591e-11
AC009133.1	2.00562	1.54277	38.5069	5.45609e-10	6.49279e-09
NA..2434	2.00874	-0.100472	9.90468	0.00164859	0.00566409
AC119674.1	2.01298	0.831445	13.5797	0.000228644	0.000981212
FEZ1	2.01331	2.07441	51.0795	8.86995e-13	1.48201e-11
PHLDB3	2.01332	1.32301	35.311	2.81043e-09	3.01433e-08
AP001453.2	2.01609	2.88894	76.3415	2.38614e-18	6.56608e-17
RN7SL449P	2.021	-0.0984269	9.07704	0.00258839	0.00842443
PURPL	2.02465	5.72291	227.529	2.06228e-51	3.37376e-49
MOB3B	2.02538	3.23728	101.147	8.53889e-24	3.36292e-22
C1orf116	2.02664	0.83054	19.1431	1.21276e-05	7.0005e-05
CDH1	2.02832	0.54777	18.3582	1.83033e-05	0.000101672
ZNF563	2.03957	0.450133	17.2889	3.21063e-05	0.000167766
LINC02104	2.04214	0.922871	25.6552	4.0819e-07	3.0827e-06
MIR3936HG	2.04227	1.08107	26.9966	2.03812e-07	1.62428e-06
DCDC1	2.04333	1.61434	33.7956	6.12185e-09	6.162e-08
AL365436.1	2.045	1.47104	32.9851	9.2867e-09	9.14964e-08
CAV1	2.04587	6.59914	207.083	5.94632e-47	8.19657e-45
GRIN2C	2.05234	1.94266	52.9504	3.42078e-13	6.02664e-12
RP1	2.05932	0.0756311	12.026	0.000524635	0.00205317
KIF17	2.05952	0.345582	16.4553	4.98107e-05	0.000250518
AC072039.2	2.06126	0.34468	16.1686	5.79475e-05	0.000286885
AC097065.2	2.06175	0.0754798	11.7257	0.000616414	0.00236875
PPARG	2.06726	1.53411	41.6403	1.09711e-10	1.42395e-09
TRPM6	2.06783	0.771558	22.8914	1.71414e-06	1.16045e-05
FAP	2.06885	3.41155	110.628	7.1368e-26	3.30983e-24
NA..286	2.06963	5.31687	202.592	5.67717e-46	7.41368e-44
PAPLN	2.07195	3.28479	112.38	2.95017e-26	1.41675e-24
AL158206.1	2.07329	3.72732	116.231	4.23013e-27	2.13471e-25
LINC02086	2.07492	1.60254	31.0382	2.52996e-08	2.33499e-07
PKHD1	2.07994	0.688804	19.2224	1.1634e-05	6.73912e-05
PLA2G4C	2.08064	1.2539	28.9824	7.30403e-08	6.23124e-07
AC084880.1	2.08157	0.231237	14.3291	0.000153475	0.000685975
SH3RF2	2.08168	4.14379	148.253	4.17559e-34	3.1395e-32
FAM212B	2.08244	3.87321	146.74	8.94284e-34	6.62349e-32
NA..3217	2.08403	-0.063505	10.5996	0.00113112	0.00406902
AP005242.4	2.08453	-0.0615607	11.1447	0.000842719	0.00312467
TCEA3	2.08999	-0.0645922	10.3743	0.00127783	0.00453904
APOBEC3D	2.09237	2.64599	77.914	1.07623e-18	3.04599e-17
LINC00862	2.09444	3.00832	81.9035	1.42898e-19	4.33265e-18
AL138781.1	2.09778	1.11129	28.5938	8.92677e-08	7.50807e-07
SLC6A17	2.09919	3.42177	93.6903	3.68956e-22	1.33317e-20
DUSP1	2.10362	2.86867	80.5218	2.8751e-19	8.47558e-18
ITGA2	2.10524	6.24535	267.974	3.13657e-60	6.48529e-58
SETP2	2.10963	0.373724	16.6262	4.55185e-05	0.00023159
ARHGAP45	2.1108	0.105837	11.0271	0.000897919	0.00330325
AP000695.2	2.11231	0.108484	13.2362	0.000274589	0.001158
PKD1L2	2.11312	2.31348	50.3655	1.27616e-12	2.09924e-11
TBC1D2	2.11448	3.62511	134.874	3.51869e-31	2.25788e-29
HS3ST4	2.11474	0.887447	27.5757	1.51064e-07	1.23226e-06
ADTRP	2.12526	2.19033	67.2667	2.37151e-16	5.61283e-15
IL6R	2.12624	3.29404	120.431	5.09059e-28	2.65907e-26
HSPB8	2.12683	4.35337	100.208	1.37199e-23	5.31896e-22
AP002026.1	2.13592	1.13039	22.0474	2.66006e-06	1.7422e-05
IFIT3	2.13644	2.08367	54.6712	1.42481e-13	2.62515e-12
AC090409.1	2.14795	1.84088	54.6351	1.45119e-13	2.67045e-12
FRMD6	2.14907	7.29604	345.045	5.08264e-77	1.94013e-74
AL031587.5	2.15241	0.726048	20.337	6.49314e-06	3.95999e-05
LAYN	2.15958	7.1847	330.237	8.53324e-74	2.88714e-71
AC108866.1	2.16048	0.399876	14.6274	0.000130998	0.000594202
SEMA7A	2.16143	4.19358	140.588	1.97944e-32	1.34557e-30
AL035446.1	2.16301	1.2373	28.5531	9.11642e-08	7.65893e-07
RAET1L	2.16936	1.43445	32.0413	1.50932e-08	1.43574e-07
SLC2A14	2.17086	2.45812	64.4184	1.00612e-15	2.25573e-14
IGDCC4	2.17144	2.63027	81.4599	1.78852e-19	5.37893e-18
HMGB1P3	2.17327	0.139934	13.1119	0.000293433	0.00122637
AL365226.2	2.17402	0.138886	13.3486	0.000258612	0.00109729
SERPINE1	2.18273	8.28881	249.099	4.08119e-56	7.32008e-54
PGM5P2	2.18595	5.57982	155.705	9.8217e-36	8.07821e-34
NYAP2	2.1868	0.749587	25.5885	4.22554e-07	3.18509e-06
ADGRE1	2.19032	1.51253	42.4216	7.35716e-11	9.75299e-10
PDE4C	2.19279	1.17551	32.4574	1.21836e-08	1.17701e-07
STPG4	2.19526	0.425889	16.171	5.78738e-05	0.000286711
SPOCK1	2.19854	5.3723	239.338	5.48279e-54	9.49097e-52
SLC52A1	2.20346	2.31589	77.5096	1.3208e-18	3.71696e-17
NEXN.AS1	2.20903	2.21332	69.5047	7.62335e-17	1.89148e-15
DDO	2.20923	0.549672	21.9397	2.81348e-06	1.83784e-05
GPR155	2.2125	4.13205	156.288	7.32352e-36	6.0908e-34
KHDC1L	2.2145	1.5807	43.567	4.09694e-11	5.59551e-10
AP002478.1	2.21669	3.449	112.996	2.16219e-26	1.05191e-24
APOL3	2.21982	0.663257	15.5787	7.91424e-05	0.000379695
ANKRD1	2.22067	9.0121	224.281	1.05334e-50	1.65064e-48
LINC01134	2.2239	0.00822387	12.6512	0.000375317	0.00152785
RYR2	2.2253	1.4059	43.4073	4.44525e-11	6.05457e-10
AC046195.1	2.22629	3.09911	104.621	1.47913e-24	6.16803e-23
WFDC3	2.22701	0.00752089	12.8249	0.000342037	0.00140311
C3orf52	2.23042	1.1302	31.7174	1.78322e-08	1.67593e-07
OR51B2	2.23164	0.0101943	11.1243	0.000852026	0.00315682
AC007879.3	2.23235	0.169546	14.1344	0.000170201	0.000752534
CD68	2.23296	0.172549	15.0516	0.00010461	0.000486059
AL138789.1	2.23372	0.961509	28.2866	1.04616e-07	8.725e-07
CDKN1A	2.23509	7.34824	373.062	4.03165e-83	1.81876e-80
BBS7	2.23979	5.49222	286.245	3.27191e-64	7.85627e-62
LINC00460	2.23983	0.319063	18.0186	2.18759e-05	0.000118987
AC245041.2	2.24223	2.78696	99.4503	2.01147e-23	7.75769e-22
ARHGAP22	2.2438	0.318305	17.7486	2.52097e-05	0.000134999
ADAMTS5	2.24569	1.48204	42.8948	5.7763e-11	7.747e-10
NA..2349	2.24864	0.572858	22.0271	2.68828e-06	1.75992e-05
ITGBL1	2.2666	4.84859	207.421	5.01934e-47	6.98345e-45
LETM2	2.27807	2.40622	84.2136	4.44109e-20	1.4127e-18
AC007688.1	2.28061	1.44636	47.5678	5.31349e-12	8.14644e-11
C15orf48	2.28178	2.44971	72.92	1.35014e-17	3.53242e-16
SRGN	2.28681	0.477847	21.3048	3.91751e-06	2.49444e-05
APOBEC3H	2.28781	0.478548	19.9777	7.8351e-06	4.68551e-05
XAF1	2.28991	0.343102	15.4831	8.32448e-05	0.00039771
CR786580.1	2.29746	1.32519	32.6741	1.08979e-08	1.06316e-07
SLC8A1	2.30149	-0.135729	11.4209	0.000726228	0.002744
ADAMTS1	2.30981	1.7739	44.0692	3.16967e-11	4.41411e-10
CHGA	2.31494	0.829999	30.7397	2.9507e-08	2.69492e-07
CD70	2.3165	5.85302	87.4182	8.78363e-21	2.93188e-19
ITIH5	2.32222	4.05957	204.913	1.76925e-46	2.37286e-44
MOV10L1	2.3298	1.60442	53.373	2.75861e-13	4.93599e-12
GADD45A	2.33152	5.98698	301.158	1.84307e-67	4.65048e-65
CD163L1	2.3327	1.54631	52.8672	3.56887e-13	6.26531e-12
AL139352.1	2.33411	2.06544	62.5877	2.54835e-15	5.48227e-14
[truncated: 383 more rows]

## Sheet: DE - U2OS v. HEK293T
Gene name	logFoldChange	logCountsPerMillion	LR	PValue	FDR
SERPINE1	12.3377	6.67065	1158.94	5.12e-254	2.68e-251
FAM111A	12.0551	5.59388	1304.9	9.71e-286	8e-283
LRRC4C	11.9405	5.4845	1098.12	8.47e-241	3.85e-238
MTND3P19	11.5666	5.22724	554.699	1.2e-122	1.13e-120
MAGEA12	11.5116	4.67655	740.437	4.82e-163	8.01e-161
FAM19A5	11.4121	3.99966	835.218	1.19e-183	2.6e-181
TGFBI	11.377	4.5368	947.071	5.75e-208	1.66e-205
AL590004.4	11.1991	5.23954	813.757	5.51e-179	1.11e-176
OSMR	11.1967	4.68027	572.036	2.03e-126	2.05e-124
KRT81	11.0761	6.54914	919.051	7.09e-202	1.95e-199
CTSZ	11.0709	4.7565	676.301	4.26e-149	5.99e-147
HIST1H1A	11.0227	3.85191	472.36	9.82e-105	7.29e-103
LINC00667	11.019	4.76598	867.253	1.29e-190	3.14e-188
MLH1	11.0023	4.37711	833.172	3.31e-183	7.16e-181
MAGEA1	10.9481	5.33208	1337.81	6.86e-293	6.24e-290
OCIAD2	10.8861	5.2628	1249.48	1.08e-273	6.91e-271
ANKRD20A9P	10.8077	4.27649	739.501	7.7e-163	1.26e-160
THY1	10.768	5.36507	863.097	1.03e-189	2.45e-187
KRT80	10.7288	4.44599	626.861	2.41e-138	2.89e-136
THBS1	10.7187	7.30215	1039.2	5.42e-228	2.13e-225
SLFN12	10.7123	4.25438	775.65	1.06e-170	1.91e-168
C5orf46	10.6891	3.02814	707.186	8.19e-156	1.24e-153
LRRN1	10.6272	3.50459	444.908	9.25e-99	6.04e-97
CPA4	10.5355	5.74658	846.203	4.86e-186	1.09e-183
DRD1	10.5247	5.15756	973.571	9.98e-214	3.26e-211
LTBR	10.5168	4.22552	599.003	2.76e-132	3.02e-130
TSPYL5	10.472	3.7481	621.384	3.74e-137	4.4e-135
BMP5	10.4663	4.87909	1001.71	7.64e-220	2.64e-217
NLGN4X	10.4149	3.61414	532.51	8.03e-118	7.09e-116
ANOS1	10.3754	3.47116	557.22	3.38e-123	3.25e-121
LINC00165	10.3322	4.4826	519.62	5.12e-115	4.45e-113
PARP14	10.2724	6.06508	1233.95	2.55e-270	1.52e-267
CCDC152	10.2679	4.60664	835.493	1.04e-183	2.3e-181
KRT17	10.2543	5.79028	1174.51	2.12e-257	1.14e-254
CYTL1	10.2333	3.23446	529.908	2.96e-117	2.6e-115
NA..167	10.1878	4.71849	639.143	5.13e-141	6.25e-139
JPH4	10.1541	3.59573	513.195	1.28e-113	1.08e-111
DDX60L	10.1126	3.77748	538.829	3.39e-119	3.05e-117
SNRPN	10.0865	4.45455	789.729	9.23e-174	1.72e-171
CCDC144NL	10.0647	3.31181	412.501	1.05e-91	6.18e-90
PTPRN	10.0618	3.68607	461.345	2.45e-102	1.72e-100
IL31RA	10.0579	3.98282	504.184	1.17e-111	9.49e-110
MFAP5	10.0578	3.87186	412.439	1.08e-91	6.35e-90
LINC00470	10.0243	3.72388	537.586	6.32e-119	5.66e-117
KRT75	10.0221	3.64673	470.253	2.82e-104	2.07e-102
IQCA1	10.0138	4.86967	821.016	1.46e-180	3.03e-178
KLK6	9.94544	4.7706	952.704	3.43e-209	1e-206
SLC18A2	9.90213	3.38999	373.39	3.42e-83	1.67e-81
PEG3	9.87969	3.92297	859.745	5.53e-189	1.29e-186
FAR2P1	9.79271	3.26482	255.591	1.57e-57	4.26e-56
EPM2AIP1	9.75954	5.41897	1078.34	1.68e-236	7.46e-234
MAGEA6	9.73744	2.65863	258.338	3.95e-58	1.09e-56
PCDHB5	9.68358	3.75812	512.941	1.45e-113	1.22e-111
MUC15	9.67151	2.67588	401.53	2.56e-89	1.41e-87
LINC02434	9.64777	2.76676	407.287	1.43e-90	8.13e-89
RIOX1	9.64505	3.04511	391.795	3.37e-87	1.76e-85
MYL9	9.63027	3.23813	320.465	1.15e-71	4.39e-70
LCTL	9.62787	2.76024	406.728	1.89e-90	1.06e-88
TNFRSF11B	9.6252	4.33053	551.338	6.44e-122	5.99e-120
SUN3	9.59594	4.41451	783.867	1.74e-172	3.2e-170
SLCO1B3	9.58423	4.10071	387.176	3.41e-86	1.75e-84
SLITRK4	9.57291	3.66865	565.555	5.2e-125	5.11e-123
NEGR1	9.54759	4.99032	952.988	2.97e-209	8.87e-207
TCEAL2	9.5306	2.89993	312.969	4.93e-70	1.83e-68
GAGE1	9.52156	4.59206	656.879	7.13e-145	9.14e-143
CALN1	9.48546	3.06712	408.16	9.22e-91	5.28e-89
ERVMER34.1	9.48232	2.77261	337.567	2.16e-75	8.86e-74
NNMT	9.48049	5.43869	920.231	3.93e-202	1.1e-199
MAGEC1	9.4542	1.75271	348.765	7.87e-78	3.42e-76
LINC02506	9.43886	2.76164	361.198	1.54e-80	7.2e-79
B3GALNT1	9.42631	2.7289	387.906	2.36e-86	1.22e-84
ADGRG1	9.41551	4.79851	857.81	1.46e-188	3.36e-186
MMP14	9.41103	4.45999	642.037	1.2e-141	1.48e-139
CCDC144NL.AS1	9.40398	5.37865	1279.35	3.48e-280	2.51e-277
CASP4	9.38866	2.94031	350.282	3.68e-78	1.63e-76
NPR2	9.367	3.76395	518.977	7.06e-115	6.11e-113
HENMT1	9.36069	2.81586	361.507	1.32e-80	6.2e-79
NA..4817	9.32545	2.56509	207.283	5.38e-47	1.1e-45
PLEK2	9.32286	2.53214	363.656	4.5e-81	2.13e-79
P4HTM	9.31951	2.91055	347.044	1.87e-77	8.01e-76
MAGEA8	9.30739	2.63337	349.086	6.7e-78	2.92e-76
IL18	9.23886	5.49001	981.386	2e-215	6.64e-213
FOLR1	9.22414	4.42338	675.335	6.91e-149	9.56e-147
CSMD1	9.21879	2.05505	300.073	3.18e-67	1.1e-65
AEBP1	9.21588	3.88141	608.478	2.4e-134	2.69e-132
MAGEH1	9.21586	3.57906	442.317	3.39e-98	2.2e-96
GALNT17	9.21278	2.87853	315.787	1.2e-70	4.52e-69
APOL1	9.19558	3.71711	431.244	8.71e-96	5.5e-94
GSDMD	9.17738	2.72357	323.215	2.89e-72	1.12e-70
ZNF667.AS1	9.17666	2.24622	301.208	1.8e-67	6.28e-66
PSMB8	9.17136	2.58248	325.889	7.55e-73	2.95e-71
ADAM12	9.14652	2.83972	323.665	2.3e-72	8.94e-71
DCAF12L1	9.12526	2.11537	355.099	3.29e-79	1.5e-77
AC016717.2	9.1145	2.19993	229.312	8.42e-52	1.98e-50
IFI16	9.06115	5.20762	999.911	1.88e-219	6.37e-217
LINC01436	9.05511	2.87895	305.991	1.63e-68	5.89e-67
IL7R	9.04611	3.82962	618.931	1.28e-136	1.48e-134
ZNF544	9.0396	2.30111	309.253	3.18e-69	1.16e-67
TSTD1	9.0132	3.15694	420.576	1.83e-93	1.11e-91
LINC01087	9.01215	2.2167	204.115	2.64e-46	5.26e-45
LINC00452	8.99876	2.41114	304.833	2.92e-68	1.05e-66
LAMB3	8.98523	5.12695	684.358	7.54e-151	1.08e-148
CD200	8.97712	1.91328	257.166	7.12e-58	1.95e-56
PLPP2	8.92763	5.26395	868.069	8.58e-191	2.12e-188
AL136537.2	8.92739	2.10844	307.65	7.1e-69	2.57e-67
CTGF	8.92226	7.85644	968.694	1.15e-212	3.67e-210
GABRA2	8.91523	2.53854	232.657	1.57e-52	3.75e-51
RPL10L	8.9152	2.29855	293.162	1.02e-65	3.4e-64
ANKRD1	8.89923	6.98935	953.701	2.08e-209	6.31e-207
S100A2	8.88804	5.5994	1229.61	2.25e-269	1.29e-266
PCDHA6	8.8695	1.96634	260.818	1.14e-58	3.2e-57
CCL2	8.86168	1.72471	245.551	2.42e-55	6.25e-54
NPFFR1	8.84477	1.63274	248.371	5.88e-56	1.54e-54
ABCC3	8.80375	2.6021	261.273	9.06e-59	2.55e-57
MTND6P8	8.80005	1.97595	178.551	1e-40	1.67e-39
TM4SF1	8.77182	4.27067	727.701	2.83e-160	4.54e-158
COL16A1	8.75142	3.58951	409.219	5.42e-91	3.14e-89
LINC00221	8.73387	2.23377	270.829	7.49e-61	2.24e-59
CDH13	8.73313	2.5076	361.975	1.05e-80	4.92e-79
DNM3OS	8.73061	2.06085	186.449	1.89e-42	3.37e-41
PABPC5	8.72988	2.07458	240.993	2.39e-54	6.01e-53
ZNF785	8.70614	2.36725	267.568	3.84e-60	1.13e-58
VSTM1	8.70506	2.00616	238.402	8.77e-54	2.17e-52
CRYAB	8.70395	5.18308	595.109	1.94e-131	2.07e-129
SLC43A3	8.70193	5.17381	672.022	3.63e-148	4.98e-146
FAP	8.699	1.23172	197.352	7.9e-45	1.51e-43
ANO3	8.69626	1.84978	198.811	3.8e-45	7.34e-44
PICSAR	8.68016	2.7924	229.135	9.2e-52	2.16e-50
AC124864.2	8.66592	1.5499	266.564	6.36e-60	1.84e-58
COL12A1	8.6642	5.46689	604.343	1.9e-133	2.12e-131
ZNF347	8.66112	2.00598	259.467	2.24e-58	6.26e-57
KRTAP2.3	8.65936	2.3171	212.034	4.95e-48	1.04e-46
ZNF667	8.65874	2.0241	259.081	2.72e-58	7.56e-57
AC009237.3	8.65536	2.46601	220.646	6.54e-50	1.45e-48
SFN	8.63431	6.04336	794.012	1.08e-174	2.06e-172
DDX43	8.62877	3.11711	420.53	1.87e-93	1.13e-91
L1CAM	8.60127	6.74785	1050.23	2.17e-230	8.74e-228
CADM3	8.59376	3.49222	435.517	1.02e-96	6.48e-95
ALDH1L1	8.583	1.98022	238.33	9.09e-54	2.24e-52
CD44	8.57165	5.15408	772.082	6.34e-170	1.13e-167
AC023824.7	8.56729	2.03022	219.905	9.49e-50	2.09e-48
LPAR5	8.55593	3.14732	427.563	5.51e-95	3.45e-93
POTEE	8.5558	2.06993	171.116	4.22e-39	6.65e-38
GRAMD2B	8.54692	1.94405	209.648	1.64e-47	3.39e-46
KCNN4	8.54465	3.33214	441.422	5.31e-98	3.41e-96
CLEC2B	8.52345	3.62859	412.255	1.18e-91	6.94e-90
GLIPR1	8.5046	3.39298	509.851	6.83e-113	5.68e-111
OLFML3	8.50335	3.27359	320.052	1.41e-71	5.39e-70
AC073365.1	8.49588	1.75008	229.543	7.5e-52	1.77e-50
NA..20	8.49537	3.42782	515.587	3.86e-114	3.31e-112
CHMP1B2P	8.49011	1.9849	217.599	3.02e-49	6.52e-48
GPR158	8.45933	3.37187	408.057	9.71e-91	5.54e-89
SDR42E1	8.45457	1.60187	187.418	1.16e-42	2.08e-41
GABRA5	8.44072	1.41756	202.862	4.96e-46	9.8e-45
PTGR1	8.44049	2.78897	406.786	1.84e-90	1.03e-88
ADAMTS12	8.40685	4.25263	549.36	1.73e-121	1.6e-119
FAM198B	8.39673	4.28017	905.776	5.45e-199	1.45e-196
NCOR1P3	8.38906	1.49222	189.612	3.86e-43	7e-42
C6orf15	8.38602	0.834605	153.113	3.62e-35	4.98e-34
AC079062.1	8.37841	2.58541	392.906	1.93e-87	1.02e-85
THSD7B	8.37564	1.81588	203.357	3.87e-46	7.66e-45
TLR4	8.36205	2.61622	199.776	2.34e-45	4.56e-44
ITGB3	8.35956	1.05585	183.876	6.91e-42	1.21e-40
SNHG14	8.35487	3.48014	347.832	1.26e-77	5.41e-76
PCDHB11	8.3527	2.9085	343.555	1.07e-76	4.49e-75
NCF2	8.34803	3.95168	463.237	9.5e-103	6.73e-101
AC037198.2	8.34222	1.3267	189.535	4.02e-43	7.26e-42
PTN	8.34187	4.25426	670.469	7.9e-148	1.07e-145
PSMD5	8.34088	1.76961	224.305	1.04e-50	2.35e-49
DCHS2	8.29902	5.65447	1071.77	4.51e-235	1.95e-232
NOS1	8.29742	1.314	182.296	1.53e-41	2.62e-40
AC108463.3	8.29011	1.44985	123.65	1.01e-28	1.07e-27
HIST1H2AJ	8.27584	1.34974	140.675	1.89e-32	2.35e-31
PPP2R2B	8.2543	1.43614	206.709	7.18e-47	1.45e-45
GPRC5D.AS1	8.2537	1.23433	192.171	1.07e-43	1.97e-42
EMP1	8.24899	6.49546	1281.74	1.05e-280	7.92e-278
MAP10	8.23914	1.56187	182.77	1.2e-41	2.07e-40
BRINP1	8.23229	1.40308	192.309	9.96e-44	1.84e-42
AC079949.2	8.23165	1.77163	210.797	9.2e-48	1.92e-46
ZNF813	8.20417	1.71875	186.877	1.53e-42	2.72e-41
CXorf67	8.19621	3.75859	550.208	1.13e-121	1.05e-119
TCF15	8.17096	1.60468	147.867	5.07e-34	6.71e-33
AC092447.7	8.16737	3.89044	361.46	1.35e-80	6.33e-79
ADAMTS16	8.14916	0.886363	157.712	3.58e-36	5.11e-35
ACKR3	8.11234	4.86619	515.441	4.15e-114	3.54e-112
COL22A1	8.11186	0.979626	147.358	6.55e-34	8.64e-33
C9orf84	8.1079	3.88331	184.307	5.56e-42	9.75e-41
AC080100.1	8.10717	2.0356	175.13	5.61e-40	9.08e-39
SAMD9L	8.10501	2.1325	190.115	3e-43	5.46e-42
CCDC144B	8.10449	3.71232	370.622	1.37e-82	6.66e-81
PWAR6	8.07797	1.61882	121.544	2.91e-28	3.01e-27
RPS4XP5	8.07134	3.68615	450.609	5.32e-100	3.61e-98
GABRG3	8.05631	0.894406	140.793	1.79e-32	2.22e-31
S100A16	8.05578	5.72393	1236.19	8.33e-271	5.14e-268
NRG1	8.03272	3.45843	287.7	1.58e-64	5.11e-63
HSD17B3	8.01373	0.983321	135.028	3.26e-31	3.79e-30
LINC01583	8.01158	1.76421	306.188	1.48e-68	5.35e-67
SHISA9	7.98699	1.89893	310.74	1.51e-69	5.55e-68
LINC02475	7.98078	1.86144	140.055	2.59e-32	3.19e-31
TRIM22	7.97811	1.88704	164.467	1.2e-37	1.81e-36
TM4SF19	7.97715	1.34831	153.24	3.4e-35	4.69e-34
PCDHA5	7.97634	1.38128	155.935	8.75e-36	1.23e-34
MYOCD	7.96075	2.70111	429.859	1.74e-95	1.1e-93
PID1	7.9552	1.10641	124.23	7.5e-29	8e-28
MYO18B	7.95294	2.80966	299.946	3.39e-67	1.17e-65
HNMT	7.94858	0.995105	160.011	1.13e-36	1.64e-35
IGFL2.AS1	7.94433	2.45254	302.794	8.11e-68	2.86e-66
AC089983.1	7.93972	1.92853	171.814	2.97e-39	4.71e-38
AC004846.1	7.91679	1.95254	155.015	1.39e-35	1.94e-34
AC011369.2	7.90304	1.11052	110.912	6.19e-26	5.72e-25
MCTP2	7.88624	1.73862	140.141	2.48e-32	3.06e-31
DLGAP1.AS2	7.88236	1.60855	140.805	1.77e-32	2.2e-31
SFTA1P	7.86712	2.42845	142.329	8.24e-33	1.03e-31
XAGE5	7.8479	1.72708	143.941	3.66e-33	4.66e-32
LY6K	7.81481	1.64003	147.874	5.05e-34	6.69e-33
NSUN7	7.81204	1.55687	151.452	8.35e-35	1.13e-33
ADIRF.AS1	7.80031	1.76303	138.782	4.92e-32	5.96e-31
TEK	7.79561	0.476	151.258	9.21e-35	1.25e-33
NETO1	7.77198	1.6997	219.473	1.18e-49	2.58e-48
PLA2R1	7.7614	1.87086	128.142	1.04e-29	1.16e-28
POTEH	7.76129	2.37941	179.004	8e-41	1.34e-39
SNURF	7.75936	0.772782	138.762	4.97e-32	6.01e-31
LINC01186	7.75011	1.18326	151.968	6.44e-35	8.8e-34
GPR87	7.72991	3.29558	301.107	1.89e-67	6.59e-66
CT83	7.72777	1.32338	131.037	2.43e-30	2.76e-29
SMPD4P1	7.72356	0.754742	100.453	1.21e-23	1e-22
LINC00526	7.7133	1.08716	141.243	1.42e-32	1.78e-31
AP005131.7	7.71139	2.11019	221.777	3.7e-50	8.28e-49
NOX4	7.70638	0.758889	138.221	6.52e-32	7.84e-31
ARMCX1	7.70503	3.5046	424.284	2.85e-94	1.77e-92
DPP10	7.70111	1.08005	125.232	4.53e-29	4.89e-28
C19orf33	7.69981	2.66636	238.458	8.53e-54	2.11e-52
POTEF	7.69596	2.00132	188.857	5.65e-43	1.02e-41
NA..4479	7.6948	2.03464	145.115	2.03e-33	2.61e-32
LINC02327	7.66418	1.0874	94.0411	3.09e-22	2.39e-21
LINC02484	7.62387	0.906663	109.291	1.4e-25	1.27e-24
FGF1	7.62297	1.50057	138.612	5.36e-32	6.47e-31
AC015922.4	7.61632	1.00739	133.639	6.55e-31	7.56e-30
AC016710.1	7.60938	0.913999	131.323	2.1e-30	2.4e-29
DAPP1	7.60931	0.307131	104.132	1.89e-24	1.63e-23
LINC02055	7.60591	1.49271	109.166	1.49e-25	1.35e-24
PARVG	7.60314	1.75008	233.056	1.28e-52	3.09e-51
ANGPTL2	7.60176	1.69142	229.899	6.27e-52	1.48e-50
CAVIN2	7.59464	2.95669	242.068	1.39e-54	3.54e-53
AP005482.1	7.57948	1.27176	120.581	4.72e-28	4.83e-27
LINC01606	7.57388	0.934461	119.726	7.26e-28	7.32e-27
GPR173	7.56904	2.52381	314.007	2.93e-70	1.09e-68
GABRA3	7.56486	2.31649	202.667	5.47e-46	1.08e-44
AC064862.4	7.55691	1.2049	109.569	1.22e-25	1.11e-24
PLP2	7.55152	5.81124	864.438	5.28e-190	1.27e-187
PCDHB17P	7.53212	0.852909	110.975	5.99e-26	5.55e-25
FAM155A	7.52879	2.96158	456.559	2.7e-101	1.87e-99
ECM1	7.52816	1.85482	197.662	6.76e-45	1.3e-43
GLP2R	7.50733	2.03609	127.541	1.41e-29	1.56e-28
PTPRR	7.49298	1.75613	109.662	1.16e-25	1.06e-24
AC104695.3	7.48976	2.60684	202.901	4.86e-46	9.62e-45
AC060766.7	7.47677	1.07166	118.202	1.57e-27	1.56e-26
POTEKP	7.47605	0.976569	110.894	6.24e-26	5.77e-25
AP002478.1	7.47331	1.02059	100.573	1.14e-23	9.44e-23
GABRG2	7.47223	0.84495	110.857	6.36e-26	5.87e-25
EFEMP2	7.46041	3.60152	488.478	3.06e-108	2.34e-106
FAM111A.DT	7.46033	1.2596	120.671	4.51e-28	4.62e-27
AP001999.1	7.44836	0.61632	116.776	3.21e-27	3.15e-26
RBP4	7.43979	0.686319	126.43	2.48e-29	2.72e-28
TGFB2	7.43577	7.53912	1335.41	2.28e-292	1.97e-289
AC097374.1	7.42901	2.08176	183.197	9.72e-42	1.68e-40
AC233702.2	7.42181	1.03879	120.908	4e-28	4.11e-27
AL356804.1	7.41791	0.691529	115.305	6.75e-27	6.53e-26
PRND	7.41346	0.561764	96.5065	8.9e-23	7.05e-22
ABCA13	7.41341	0.534665	120.015	6.28e-28	6.36e-27
ZNF311	7.40476	1.31107	125.585	3.79e-29	4.11e-28
LINC01638	7.40344	0.621899	109.711	1.13e-25	1.03e-24
GBP3	7.39877	1.2417	123.77	9.46e-29	1.01e-27
NA..1099	7.38935	0.741729	113.664	1.54e-26	1.47e-25
TLX2	7.38765	1.11989	112.845	2.33e-26	2.2e-25
KCNH5	7.38477	1.31911	119.711	7.32e-28	7.37e-27
MIR100HG	7.38138	1.58127	98.2938	3.61e-23	2.92e-22
NA..3475	7.38075	0.344742	104.017	2.01e-24	1.72e-23
MISP	7.37787	1.23103	119.261	9.18e-28	9.21e-27
CYP7B1	7.37397	0.526263	116.151	4.41e-27	4.3e-26
EDN1	7.3739	3.37251	406.444	2.18e-90	1.22e-88
AC245041.2	7.37097	0.976429	105.765	8.3e-25	7.22e-24
LINC00668	7.3671	2.16263	236.598	2.17e-53	5.31e-52
XDH	7.36319	0.959856	111.77	4.01e-26	3.75e-25
LINC02577	7.35721	1.26406	100.895	9.7e-24	8.07e-23
CLIP3	7.34814	2.88181	301.051	1.94e-67	6.77e-66
AC026785.3	7.34645	0.756687	107.891	2.84e-25	2.54e-24
C1RL.AS1	7.34077	1.87276	100.76	1.04e-23	8.62e-23
NA..375	7.32696	0.973623	96.1029	1.09e-22	8.61e-22
PPP1R2P10	7.32286	0.735646	102.249	4.9e-24	4.12e-23
USP24P1	7.32022	0.66361	82.6727	9.68e-20	6.6e-19
LINC00973	7.3195	1.54564	218.767	1.68e-49	3.65e-48
XAGE2	7.31756	1.06436	102.768	3.77e-24	3.19e-23
MTND3P10	7.30927	1.27141	90.2894	2.06e-21	1.53e-20
ANKRD30BP1	7.30342	0.0925939	98.1133	3.95e-23	3.18e-22
HSPA1A	7.29021	5.98614	1276.14	1.74e-279	1.2e-276
RAB17	7.28762	0.608699	109.205	1.46e-25	1.33e-24
DOCK10	7.28757	2.3478	305.72	1.87e-68	6.72e-67
AC023824.1	7.2782	1.00882	106.011	7.33e-25	6.41e-24
GAS6.AS1	7.26758	2.77161	219.413	1.21e-49	2.66e-48
HERC2P3	7.26394	1.71047	186.173	2.18e-42	3.87e-41
KCNK6	7.25892	1.44222	109.982	9.89e-26	9.04e-25
SLITRK6	7.25861	3.12893	507.459	2.26e-112	1.87e-110
CASC8	7.25733	1.26938	102.021	5.49e-24	4.61e-23
LINC01882	7.25329	0.885255	98.163	3.85e-23	3.11e-22
SYCE1	7.25166	1.9416	204.979	1.71e-46	3.43e-45
PKP3	7.24372	1.42192	96.8874	7.34e-23	5.84e-22
NEK2P4	7.23391	0.514586	97.0581	6.73e-23	5.37e-22
CNTN3	7.22985	0.508461	91.5945	1.06e-21	8.02e-21
FLG.AS1	7.22954	2.52079	101.072	8.87e-24	7.4e-23
ARSI	7.22278	2.97169	279.42	1e-62	3.09e-61
PHF11	7.2181	2.13361	207.994	3.76e-47	7.7e-46
RPL10P9	7.21758	3.66107	396.689	2.9e-88	1.57e-86
PARP12	7.20308	1.08414	89.5225	3.03e-21	2.24e-20
LINC00052	7.18738	0.244141	99.909	1.6e-23	1.31e-22
AC005307.1	7.17729	0.620066	105.613	8.96e-25	7.79e-24
GJB3	7.16687	1.45135	99.9265	1.58e-23	1.3e-22
APOL6	7.16492	2.83783	365.554	1.74e-81	8.31e-80
AL358334.2	7.16314	1.39515	162.107	3.92e-37	5.78e-36
ITGBL1	7.14981	3.80336	349.113	6.61e-78	2.89e-76
RNU6.485P	7.14832	1.01792	82.0951	1.3e-19	8.75e-19
CGAS	7.14778	2.68547	305.895	1.71e-68	6.17e-67
EDN2	7.14579	2.90198	351.845	1.68e-78	7.49e-77
SLITRK2	7.14081	0.671451	106.22	6.6e-25	5.8e-24
VAT1L	7.13467	1.50227	188.57	6.53e-43	1.18e-41
NA..161	7.1343	1.01923	102.123	5.22e-24	4.38e-23
SERPINB5	7.13292	0.646747	94.4407	2.53e-22	1.97e-21
LAT2	7.13242	1.91238	91.6369	1.04e-21	7.86e-21
NA..4365	7.12564	0.778589	101.671	6.55e-24	5.48e-23
SLC35D2	7.11822	1.85456	196.588	1.16e-44	2.2e-43
AL390729.1	7.117	0.664181	82.8215	8.98e-20	6.13e-19
FRMPD4	7.10947	0.200633	79.2164	5.57e-19	3.63e-18
AL139327.1	7.10295	0.727578	97.4195	5.61e-23	4.48e-22
AC078993.1	7.10041	0.738919	82.3358	1.15e-19	7.77e-19
IGFL3	7.09775	0.0531116	89.8939	2.51e-21	1.86e-20
SH3TC2.DT	7.09541	1.03326	99.5588	1.9e-23	1.56e-22
INHBA	7.08622	6.69974	1027.12	2.29e-225	8.43e-223
ETV5	7.08295	3.40275	488.84	2.55e-108	1.96e-106
FLRT2	7.08103	4.93063	829.053	2.6e-182	5.56e-180
CLEC7A	7.07542	-0.0995883	95.0102	1.89e-22	1.48e-21
FLJ36000	7.07523	0.998342	90.9697	1.46e-21	1.09e-20
ZNF860	7.05598	2.36839	291.935	1.88e-65	6.25e-64
FAM153B	7.05109	0.720998	75.3303	3.98e-18	2.49e-17
LGALS8	7.0477	3.40242	394.697	7.86e-88	4.21e-86
IL2RB	7.04432	1.0124	144.888	2.27e-33	2.92e-32
AC068491.4	7.04003	0.906827	82.8421	8.89e-20	6.07e-19
MYEOV	7.031	3.68231	611.375	5.62e-135	6.39e-133
FLJ22447	7.01894	1.84534	267.632	3.72e-60	1.09e-58
SYT11	7.01463	5.29755	847.103	3.1e-186	7.05e-184
RPL23P4	7.01411	0.737657	73.6482	9.34e-18	5.73e-17
RNU7.181P	7.01149	0.412378	70.8028	3.95e-17	2.34e-16
LINC00958	7.00797	4.49646	664.727	1.4e-146	1.85e-144
TMPRSS3	6.97478	2.3018	169.601	9.04e-39	1.41e-37
LINC02104	6.97289	0.314819	81.2561	1.98e-19	1.33e-18
AC087855.2	6.96559	0.569273	69.3057	8.43e-17	4.89e-16
POTEC	6.96488	-0.177156	82.8423	8.89e-20	6.07e-19
ITGB8	6.9609	5.34893	883.726	3.39e-194	8.61e-192
NA..165	6.95695	3.17391	352.991	9.46e-79	4.25e-77
PCDHA12	6.94412	2.89816	257.074	7.45e-58	2.04e-56
PCDHB12	6.9416	1.9896	189.602	3.88e-43	7.03e-42
UNC13D	6.94056	3.64344	499.518	1.21e-110	9.69e-109
SLC52A1	6.93957	0.890151	91.0419	1.41e-21	1.05e-20
AC009502.1	6.93546	0.690835	73.5595	9.76e-18	5.97e-17
C2CD2	6.9324	2.17091	172.674	1.93e-39	3.08e-38
NCOR1P1	6.93096	0.192498	85.7965	1.99e-20	1.41e-19
ALPP	6.93072	0.189114	57.2823	3.78e-14	1.85e-13
TMEM200A	6.92753	1.44577	210.694	9.69e-48	2.02e-46
AP000662.1	6.91939	0.551292	83.1165	7.74e-20	5.3e-19
ADGRL4	6.91834	0.135838	85.2803	2.59e-20	1.82e-19
GAS6.AS2	6.91445	1.868	226.026	4.39e-51	1.01e-49
ETS1	6.91423	3.74072	584.541	3.86e-129	3.95e-127
NEDD9	6.91159	4.47097	717.936	3.76e-158	5.86e-156
NA..101	6.9027	4.28776	700.694	2.11e-154	3.12e-152
PAPPA	6.89855	2.51944	159.121	1.76e-36	2.54e-35
AC064862.3	6.8938	0.680435	76.1406	2.64e-18	1.67e-17
AL355922.2	6.8876	0.718334	77.0782	1.64e-18	1.05e-17
COL6A3	6.88608	3.62899	590.734	1.73e-130	1.81e-128
AL359851.1	6.88473	1.48809	125.614	3.74e-29	4.06e-28
AC046195.1	6.88286	0.964866	81.7613	1.54e-19	1.03e-18
AC242376.2	6.88108	0.824274	82.2317	1.21e-19	8.19e-19
MYL2	6.8784	1.5818	86.2667	1.57e-20	1.12e-19
GP6	6.87501	2.27997	218.459	1.96e-49	4.25e-48
POTEG	6.85795	0.758137	70.4193	4.79e-17	2.82e-16
AL161431.1	6.85102	0.570925	78.7338	7.11e-19	4.61e-18
KCTD14	6.85089	1.55797	141.04	1.58e-32	1.96e-31
PCDHB10	6.84238	1.84365	137.465	9.54e-32	1.14e-30
BTBD19	6.83719	1.74235	138.43	5.87e-32	7.08e-31
SLAMF7	6.83707	1.53388	81.8973	1.43e-19	9.66e-19
PDGFB	6.83699	4.22516	301.802	1.33e-67	4.68e-66
AMIGO2	6.83133	7.20887	1178.36	3.09e-258	1.72e-255
ZMAT4	6.81694	0.081637	80.9275	2.34e-19	1.56e-18
ZNF600	6.81515	0.8432	83.6034	6.05e-20	4.17e-19
DGKG	6.81501	0.996458	150.524	1.33e-34	1.79e-33
AP1M2	6.81393	4.15894	581.695	1.6e-128	1.63e-126
NA..4368	6.81168	0.66775	84.3977	4.05e-20	2.82e-19
AF274855.1	6.80954	1.04557	83.9457	5.09e-20	3.53e-19
PPP1R3C	6.80564	0.675281	85.486	2.33e-20	1.64e-19
AL158211.5	6.79753	0.435211	82.8849	8.7e-20	5.95e-19
LINC01608	6.79649	1.34395	133.646	6.53e-31	7.54e-30
CLU	6.79523	10.2809	1029.44	7.18e-226	2.7e-223
SSC4D	6.79088	4.23819	708.172	5e-156	7.72e-154
NA..5898	6.78659	1.31473	154.031	2.28e-35	3.16e-34
SOX17	6.78522	0.255856	79.7722	4.2e-19	2.76e-18
FAM198B.AS1	6.78507	1.96241	190.549	2.41e-43	4.41e-42
PCDHB18P	6.77758	0.370311	80.7026	2.62e-19	1.74e-18
ZNF558	6.775	1.45583	137.093	1.15e-31	1.37e-30
CHD5	6.77475	3.19998	379.954	1.27e-84	6.37e-83
TMEM52B	6.77259	-0.149945	71.0531	3.48e-17	2.07e-16
IL22RA1	6.77007	0.634184	63.2475	1.82e-15	9.75e-15
LRRC15	6.76946	0.972368	141.406	1.31e-32	1.64e-31
MTND5P11	6.76461	4.28435	486.118	9.97e-108	7.59e-106
COL3A1	6.76206	5.68758	1033.87	7.8e-227	3e-224
ENG	6.76045	0.509215	149.329	2.43e-34	3.25e-33
OPRK1	6.76025	0.481468	66.9436	2.79e-16	1.57e-15
AL078590.3	6.75972	0.0818293	75.1471	4.37e-18	2.73e-17
ZNF662	6.75848	0.902292	82.4107	1.11e-19	7.49e-19
MTND3P25	6.75602	1.4578	111.571	4.44e-26	4.14e-25
LINC00862	6.74977	1.15627	139.627	3.21e-32	3.93e-31
ZNF528.AS1	6.74838	0.899785	79.5022	4.82e-19	3.15e-18
SERPINB7	6.747	0.594032	63.5744	1.54e-15	8.3e-15
L3MBTL4	6.74418	1.83303	144.585	2.65e-33	3.39e-32
CYP4F11	6.73619	0.844388	79.6194	4.54e-19	2.97e-18
APCDD1L.AS1	6.73389	2.70633	206.896	6.53e-47	1.33e-45
UNC5D	6.72704	0.355795	78.693	7.26e-19	4.7e-18
BX322234.1	6.72247	0.589685	80.7252	2.59e-19	1.72e-18
AC005863.1	6.72225	-0.0758641	68.9509	1.01e-16	5.83e-16
CX3CL1	6.71574	1.53761	129.5	5.27e-30	5.93e-29
RPS10P7	6.71258	0.503612	73.7635	8.81e-18	5.41e-17
GSAP	6.71152	1.69499	123.047	1.36e-28	1.43e-27
AC122685.1	6.70628	0.132473	69.5208	7.56e-17	4.39e-16
SNHG18	6.70308	1.53283	198.841	3.74e-45	7.23e-44
CCDC149	6.69613	0.346899	67.1636	2.5e-16	1.41e-15
MMP19	6.69558	1.63233	132.025	1.48e-30	1.69e-29
GUSBP5	6.68833	0.288788	67.2291	2.42e-16	1.36e-15
AOX1	6.67873	0.921143	68.2178	1.46e-16	8.38e-16
NINJ2	6.67794	0.640232	67.8398	1.77e-16	1.01e-15
NA..308	6.67707	0.319227	79.5844	4.62e-19	3.03e-18
PDGFRB	6.67637	3.95776	499.348	1.32e-110	1.05e-108
MARCH4	6.67574	0.956724	76.5772	2.12e-18	1.34e-17
GPR4	6.67097	0.32733	74.9953	4.72e-18	2.94e-17
AC064862.5	6.66345	0.456618	71.4252	2.88e-17	1.72e-16
MAN1A2P1	6.65825	-0.0739729	68.6921	1.15e-16	6.64e-16
TUFMP1	6.65807	0.0874498	51.8838	5.89e-13	2.66e-12
IFITM3	6.65527	5.04213	514.582	6.39e-114	5.42e-112
CHI3L1	6.65494	0.583505	70.9522	3.66e-17	2.18e-16
AP005119.2	6.65261	1.27636	107.776	3.01e-25	2.69e-24
RNU6.301P	6.65211	0.321952	65.3842	6.16e-16	3.39e-15
TNNT2	6.642	3.25112	184.633	4.72e-42	8.29e-41
PCDHA4	6.641	0.994266	143.879	3.78e-33	4.8e-32
RNU6ATAC12P	6.6388	0.197205	51.624	6.72e-13	3.01e-12
TRANK1	6.63836	1.27734	142.458	7.72e-33	9.72e-32
CLDN4	6.63834	2.85365	412.115	1.27e-91	7.42e-90
EBI3	6.63332	-0.0653982	45.0532	1.92e-11	7.71e-11
GSG1	6.63152	0.781921	59.555	1.19e-14	6.02e-14
SLC16A3	6.6304	0.64271	69.8825	6.29e-17	3.67e-16
AP000350.6	6.61743	1.48251	94.8338	2.07e-22	1.62e-21
NA..3487	6.61614	0.165408	66.1311	4.22e-16	2.34e-15
AC069120.1	6.61367	-0.186898	58.9304	1.63e-14	8.16e-14
ONECUT3	6.60767	1.17224	118.21	1.56e-27	1.55e-26
CUTALP	6.6054	2.22675	251.355	1.32e-56	3.48e-55
VGF	6.60514	4.69221	508.491	1.35e-112	1.12e-110
COL8A1	6.60306	1.76031	124.355	7.04e-29	7.53e-28
LINC01579	6.59699	0.123247	55.0717	1.16e-13	5.51e-13
DOK5	6.59642	1.65139	212.909	3.19e-48	6.72e-47
NA..119	6.59421	0.480931	135.561	2.49e-31	2.91e-30
AC006504.1	6.58957	1.63574	172.898	1.72e-39	2.75e-38
LINC01139	6.5888	0.105825	53.7576	2.27e-13	1.05e-12
DCAF8L2	6.58864	0.386534	62.1117	3.25e-15	1.71e-14
AC006206.2	6.58382	0.503745	69.9703	6.02e-17	3.52e-16
PRDM1	6.58122	2.3365	349.564	5.27e-78	2.31e-76
MSLN	6.57875	1.2123	66.8473	2.93e-16	1.64e-15
TBX5	6.57855	0.187623	69.9706	6.02e-17	3.52e-16
MGMT	6.57849	1.60498	120.06	6.14e-28	6.22e-27
ZNF528	6.57137	1.55681	132.979	9.14e-31	1.05e-29
AC108463.1	6.56961	1.34708	140.94	1.66e-32	2.06e-31
AL121904.1	6.56742	0.0955785	65.0818	7.19e-16	3.94e-15
SLC15A3	6.56312	0.681667	55.916	7.56e-14	3.63e-13
UNC80	6.55319	0.431573	52.0253	5.48e-13	2.48e-12
AC090409.1	6.54643	0.430814	64.3842	1.02e-15	5.54e-15
KISS1	6.5451	0.219895	52.4324	4.45e-13	2.03e-12
DLGAP1.AS1	6.54329	3.33256	458.354	1.1e-101	7.68e-100
KCNV1	6.5383	0.109828	69.7628	6.69e-17	3.9e-16
MIR205HG	6.52855	0.43384	57.1362	4.07e-14	1.99e-13
AC244153.1	6.52423	0.209048	66.7067	3.15e-16	1.76e-15
C8orf48	6.52094	0.197583	58.913	1.65e-14	8.23e-14
MDFI	6.51086	1.29957	115.26	6.9e-27	6.68e-26
CALB2	6.50463	1.87126	248.86	4.6e-56	1.21e-54
AF279873.3	6.50359	0.323342	65.3998	6.11e-16	3.37e-15
ZNF542P	6.5032	-0.440479	64.5979	9.19e-16	4.99e-15
AC015712.2	6.50107	0.239932	62.284	2.97e-15	1.57e-14
KRT34	6.49563	0.547504	57.475	3.42e-14	1.68e-13
AC237221.1	6.48852	0.549363	64.7142	8.66e-16	4.71e-15
LFNG	6.48552	5.37363	872.522	9.23e-192	2.31e-189
CCL26	6.48296	1.04316	114.969	7.99e-27	7.71e-26
LAMC2	6.48062	4.1652	652.621	6.01e-144	7.59e-142
AC018558.1	6.47336	-0.169714	64.7912	8.33e-16	4.53e-15
NFE4	6.46728	-0.394695	60.6699	6.75e-15	3.47e-14
LINC00511	6.46348	4.78339	913.874	9.46e-201	2.56e-198
LYPD8	6.46321	0.34257	61.4637	4.51e-15	2.35e-14
TMEM176A	6.46235	1.84367	66.4208	3.64e-16	2.03e-15
UPK3BL1	6.43218	0.512714	64.7748	8.4e-16	4.57e-15
SH3TC2	6.43187	1.73862	114.179	1.19e-26	1.14e-25
KIRREL3	6.42947	-0.108825	65.7109	5.22e-16	2.89e-15
RAET1L	6.42669	0.379475	57.7225	3.02e-14	1.49e-13
AL365181.2	6.42661	3.17063	310.262	1.91e-69	7.02e-68
PCDHB6	6.42089	-0.0393214	62.2145	3.08e-15	1.62e-14
AC005381.1	6.41763	-0.283111	57.5887	3.23e-14	1.59e-13
AC117402.1	6.41026	3.33365	444.318	1.24e-98	8.08e-97
WBP2NL	6.40995	0.178371	55.4312	9.68e-14	4.61e-13
HR	6.40778	3.25468	350.555	3.21e-78	1.42e-76
AL138789.1	6.39165	0.489804	62.5005	2.66e-15	1.41e-14
CYYR1	6.3864	1.02776	106.413	5.99e-25	5.27e-24
PCDHA7	6.38577	0.0194728	47.587	5.26e-12	2.22e-11
TNC	6.38506	3.21898	289.274	7.16e-65	2.34e-63
FOXA2	6.38406	2.54286	238.354	8.99e-54	2.21e-52
F2RL2	6.38106	1.84734	120.387	5.21e-28	5.31e-27
AC132825.3	6.37828	0.351682	55.9168	7.56e-14	3.63e-13
AL365226.2	6.37172	-0.488523	60.4257	7.64e-15	3.92e-14
TUBA3E	6.36829	0.128909	61.8667	3.68e-15	1.93e-14
LINC01060	6.36603	0.0457668	57.7157	3.03e-14	1.49e-13
C1orf143	6.3652	0.344847	57.9704	2.66e-14	1.31e-13
NA..1396	6.36342	0.518109	57.5595	3.28e-14	1.61e-13
LINC02302	6.36104	-0.109784	54.8709	1.29e-13	6.07e-13
FAM153A	6.3608	0.177603	59.5208	1.21e-14	6.12e-14
GRIN2A	6.35546	-0.311322	55.8133	7.97e-14	3.82e-13
ATP6V0A4	6.33766	0.382074	51.1242	8.67e-13	3.86e-12
OSMR.AS1	6.33726	0.595391	49.8268	1.68e-12	7.31e-12
NF1P6	6.33524	0.0177009	42.0711	8.8e-11	3.36e-10
AL359976.1	6.33509	0.873328	76.6797	2.01e-18	1.28e-17
ENC1	6.33018	6.26578	955.408	8.85e-210	2.73e-207
BANK1	6.32932	0.0756846	51.9442	5.71e-13	2.58e-12
AP005131.6	6.32512	0.106912	40.1225	2.39e-10	8.82e-10
NA..5717	6.32408	-0.396161	56.9644	4.44e-14	2.16e-13
NTRK3	6.31938	1.92986	298.8	6.02e-67	2.06e-65
NA..4874	6.31801	-0.164253	57.7711	2.94e-14	1.45e-13
LINC02476	6.317	-0.0267986	59.9883	9.54e-15	4.86e-14
SPRED3	6.3137	-0.0479706	47.4891	5.53e-12	2.33e-11
GNGT2	6.30544	0.488302	51.3734	7.64e-13	3.41e-12
TRIML2	6.30249	0.337292	121.239	3.39e-28	3.5e-27
SCEL	6.28913	0.338297	49.4887	2e-12	8.64e-12
MOV10L1	6.28857	-0.149419	44.3383	2.76e-11	1.1e-10
BAGE2	6.28186	0.738261	112.878	2.29e-26	2.17e-25
DPY19L2P1	6.27502	0.584903	89.0588	3.83e-21	2.81e-20
CGREF1	6.27261	1.66889	144.569	2.67e-33	3.41e-32
TCERG1L.AS1	6.2715	-0.0537054	44.671	2.33e-11	9.32e-11
SLFN12L	6.26568	0.481134	51.0699	8.91e-13	3.96e-12
NRG3	6.26154	0.0261076	51.6561	6.61e-13	2.97e-12
SLCO1A2	6.26074	1.71168	132.005	1.49e-30	1.71e-29
GPRC5A	6.25976	6.80741	813.151	7.46e-179	1.48e-176
LINC00944	6.25378	1.16927	101.135	8.59e-24	7.17e-23
C3AR1	6.23627	-0.0761814	54.3293	1.7e-13	7.92e-13
AC093535.2	6.23029	-0.31343	39.6597	3.02e-10	1.11e-09
ODAPH	6.2276	-0.156929	52.5674	4.16e-13	1.9e-12
SOCS1	6.22676	1.85038	187.283	1.25e-42	2.23e-41
NA..1281	6.22465	-0.284881	53.6584	2.39e-13	1.1e-12
ANO2	6.22202	2.96825	262.721	4.38e-59	1.25e-57
KHDC1L	6.2161	0.338329	51.7704	6.24e-13	2.81e-12
FOSL2	6.21608	5.54176	1119.53	1.88e-245	9.04e-243
C6orf223	6.2149	-0.513498	50.6821	1.09e-12	4.81e-12
ZNF135	6.21313	0.055417	42.8667	5.86e-11	2.27e-10
DGKI	6.21047	-0.00910079	54.6106	1.47e-13	6.9e-13
AC241520.1	6.20788	0.116009	49.5288	1.95e-12	8.47e-12
GABRA1	6.20578	0.697945	67.9574	1.67e-16	9.54e-16
AC105446.1	6.19942	0.769447	103.789	2.25e-24	1.93e-23
MYO16	6.19128	0.184375	55.0924	1.15e-13	5.46e-13
AL355916.1	6.18329	0.306286	56.3138	6.18e-14	2.98e-13
AC114485.1	6.17874	0.14359	52.1359	5.18e-13	2.35e-12
EDIL3	6.17411	7.51989	1158.26	7.19e-254	3.66e-251
ZNF844	6.17369	0.56622	50.6911	1.08e-12	4.79e-12
CACNG7	6.17108	2.07544	241.094	2.27e-54	5.72e-53
KLHL4	6.17062	1.43622	125.026	5.02e-29	5.41e-28
NTF3	6.16632	1.24796	107.804	2.97e-25	2.66e-24
ZFPM2.AS1	6.16105	2.18912	182.824	1.17e-41	2.03e-40
LOXL4	6.16059	4.5077	648.703	4.28e-143	5.32e-141
AC087380.1	6.15317	1.67304	258.914	2.96e-58	8.19e-57
AL133467.4	6.15256	0.00639666	48.5708	3.19e-12	1.36e-11
TMEM215	6.1516	-0.354999	51.0158	9.16e-13	4.07e-12
C4orf19	6.15152	0.323134	49.8116	1.69e-12	7.37e-12
ANKRD30B	6.15112	-0.0759893	50.3884	1.26e-12	5.55e-12
AC011453.1	6.14965	-0.37465	42.8214	6e-11	2.32e-10
TRPC6	6.14617	-0.335149	46.9283	7.36e-12	3.06e-11
AC022784.1	6.14393	3.78495	540.467	1.49e-119	1.35e-117
AP005233.2	6.14051	-0.233736	47.8337	4.64e-12	1.96e-11
CSRP1	6.13969	3.75834	479.025	3.48e-106	2.61e-104
MMP3	6.13389	0.799159	45.488	1.54e-11	6.22e-11
SLFN13	6.1294	0.112983	45.9922	1.19e-11	4.85e-11
ITPKB	6.12563	1.2221	145.451	1.71e-33	2.21e-32
AC108676.1	6.12456	-0.563988	51.9218	5.78e-13	2.61e-12
HS3ST4	6.11312	0.0486562	42.7168	6.33e-11	2.44e-10
LINC02057	6.10557	0.395881	46.4917	9.2e-12	3.79e-11
AC005291.1	6.10319	1.01974	82.6638	9.73e-20	6.62e-19
AC100839.1	6.1013	-0.267004	44.7067	2.29e-11	9.15e-11
TMEM132C	6.09655	0.0789555	46.8013	7.86e-12	3.25e-11
PCDHB3	6.08346	0.454118	97.3704	5.75e-23	4.59e-22
HCG23	6.08047	-0.11735	48.929	2.65e-12	1.14e-11
FAM218A	6.07869	-0.20972	49.0444	2.5e-12	1.08e-11
KCNK10	6.07832	0.723913	138.943	4.53e-32	5.5e-31
MICALCL	6.07462	1.72433	136.313	1.7e-31	2.01e-30
TRPM2	6.07067	2.22901	137.946	7.49e-32	9e-31
HNRNPA1P66	6.069	0.578135	82.9921	8.24e-20	5.64e-19
MIMT1	6.06398	-0.274078	46.9985	7.1e-12	2.95e-11
MED15P9	6.05793	-0.107547	41.4988	1.18e-10	4.46e-10
LINC01807	6.04862	0.490652	47.2365	6.29e-12	2.63e-11
PCDHGC3	6.04564	-0.164827	44.2238	2.93e-11	1.16e-10
LEMD1	6.04493	-0.47135	48.4905	3.32e-12	1.42e-11
IGFBP7	6.03501	7.29873	1274.31	4.32e-279	2.87e-276
CCDC63	6.03486	-0.0389734	47.8174	4.68e-12	1.98e-11
AC091181.1	6.03422	-0.0736212	40.0816	2.44e-10	9e-10
AC010457.1	6.02667	1.2382	80.1711	3.43e-19	2.26e-18
JAKMIP2	6.02529	4.11453	596.382	1.02e-131	1.1e-129
ARL4AP2	6.01828	0.179384	42.7657	6.17e-11	2.39e-10
LINC02377	6.01125	-0.246751	43.1918	4.96e-11	1.93e-10
NA..79	6.00338	4.46817	338.252	1.53e-75	6.31e-74
ACOT4	6.00133	1.19458	90.8522	1.55e-21	1.16e-20
C1orf186	5.99557	-0.641104	46.6882	8.32e-12	3.44e-11
LINC00689	5.99323	1.36107	48.2786	3.7e-12	1.57e-11
CDK5R2	5.98544	1.21095	78.6559	7.39e-19	4.79e-18
AC134312.5	5.98454	-0.161577	46.2324	1.05e-11	4.3e-11
AC135782.1	5.98309	0.168777	48.0519	4.15e-12	1.76e-11
NCOR1P2	5.98148	-0.448601	46.5337	9.01e-12	3.71e-11
SYT4	5.98018	-0.563768	41.851	9.85e-11	3.75e-10
RCN3	5.97276	1.84827	169.785	8.24e-39	1.28e-37
ANKRD20A8P	5.97176	4.35003	338.352	1.46e-75	6.02e-74
CDH6	5.9703	-0.378899	45.6135	1.44e-11	5.85e-11
C5orf17	5.96133	0.233768	46.4987	9.17e-12	3.77e-11
AC011352.1	5.96127	-0.643726	44.261	2.87e-11	1.14e-10
RPL32P33	5.95574	-0.510088	39.4484	3.37e-10	1.23e-09
KCNQ3	5.95547	1.79777	125.434	4.09e-29	4.43e-28
HRH1	5.95249	3.565	374.75	1.73e-83	8.48e-82
ADGRD1.AS1	5.95153	1.92202	174.701	6.96e-40	1.12e-38
AC006262.2	5.94922	-0.338639	41.1207	1.43e-10	5.38e-10
TRIL	5.94715	2.31827	210.004	1.37e-47	2.84e-46
AC090109.1	5.93977	0.471782	40.8777	1.62e-10	6.08e-10
ZNF334	5.93928	0.71724	81.4235	1.82e-19	1.22e-18
SNX19	5.93429	4.01642	516.808	2.09e-114	1.8e-112
AC022034.2	5.93225	-0.220265	42.6585	6.52e-11	2.51e-10
ADAMTSL3	5.93047	3.19335	322.939	3.32e-72	1.28e-70
ITGA3	5.92717	6.7323	1005.19	1.34e-220	4.72e-218
AC008945.1	5.92649	-0.176563	44.5359	2.5e-11	9.97e-11
AC006262.1	5.91634	-0.294711	42.7348	6.27e-11	2.42e-10
CSRP3	5.90487	0.360865	45.9514	1.21e-11	4.95e-11
AC246817.2	5.8987	-0.585497	39.6476	3.04e-10	1.12e-09
ECHDC3	5.89487	-0.212747	45.1183	1.85e-11	7.47e-11
KLK5	5.89448	0.238328	38.6016	5.2e-10	1.87e-09
LGALS1	5.88789	7.03271	762.79	6.64e-168	1.16e-165
ZNF665	5.88342	0.345742	43.1721	5.01e-11	1.95e-10
ARSD	5.88278	-0.472225	41.4569	1.2e-10	4.56e-10
AC107954.1	5.88258	-0.429429	42.6797	6.45e-11	2.49e-10
IER3	5.87857	7.62867	1130.44	8.02e-248	3.96e-245
PRB3	5.87659	-0.48797	36.9837	1.19e-09	4.17e-09
CYR61	5.86602	7.44058	482.365	6.53e-107	4.91e-105
ALPK2	5.85818	3.29981	420.736	1.69e-93	1.03e-91
PRSS33	5.85203	-0.19451	41.1333	1.42e-10	5.35e-10
ITGAX	5.84457	0.354205	42.1587	8.42e-11	3.22e-10
RPS14P4	5.84367	-0.0870978	38.1085	6.69e-10	2.39e-09
GPNMB	5.84231	4.39216	436.517	6.2e-97	3.94e-95
PCDHAC1	5.84174	0.470662	70.2959	5.1e-17	3e-16
CRB2	5.83221	0.902541	42.229	8.12e-11	3.11e-10
ESYT3	5.82837	0.0354916	39.4937	3.29e-10	1.2e-09
SAA1	5.82678	-0.40309	37.5473	8.92e-10	3.15e-09
NA..191	5.82522	0.107678	70.5111	4.58e-17	2.71e-16
NA..573	5.82028	0.446733	79.761	4.23e-19	2.77e-18
ADTRP	5.82009	-0.312677	42.2516	8.03e-11	3.08e-10
MMP7	5.81908	-0.470713	42.3343	7.69e-11	2.95e-10
EPS8L2	5.81856	2.39596	146.242	1.15e-33	1.5e-32
NA..4411	5.81775	-0.519929	36.7516	1.34e-09	4.67e-09
NPFFR2	5.81707	3.16079	280.436	6.03e-63	1.87e-61
AC006058.3	5.81677	-0.0429413	39.5527	3.19e-10	1.17e-09
PCDHA1	5.81656	-0.0835108	42.2306	8.11e-11	3.11e-10
ZFP82	5.81468	-0.174735	70.8339	3.89e-17	2.31e-16
SULT1A2	5.81138	0.213753	42.0371	8.96e-11	3.42e-10
LINC02109	5.8091	-0.176945	39.3044	3.63e-10	1.32e-09
OR51B4	5.80778	-0.257368	41.6825	1.07e-10	4.08e-10
TPTEP1	5.80063	3.2668	395.165	6.22e-88	3.34e-86
GRIN2B	5.79634	0.732315	67.1424	2.53e-16	1.42e-15
LINC02152	5.78405	-0.21416	34.3939	4.5e-09	1.49e-08
POTED	5.77542	-0.727762	38.9625	4.32e-10	1.56e-09
PEG10	5.76287	2.77257	337.865	1.86e-75	7.65e-74
MIR4435.2HG	5.75981	5.62867	1050.78	1.64e-230	6.77e-228
XKR4	5.75965	0.204164	70.1296	5.55e-17	3.25e-16
RBFOX1	5.75338	-0.473838	39.3586	3.53e-10	1.29e-09
AC069120.3	5.75328	-0.753051	37.6693	8.38e-10	2.97e-09
LINC01429	5.74971	-0.336752	32.092	1.47e-08	4.66e-08
AL365181.3	5.74269	1.7747	111.877	3.8e-26	3.55e-25
HMGN1P16	5.7405	-0.0272285	37.194	1.07e-09	3.76e-09
ZDHHC15	5.74046	0.756247	76.4046	2.31e-18	1.46e-17
KCNK3	5.74001	0.127263	40.2109	2.28e-10	8.45e-10
GPX7	5.73838	1.23292	122.614	1.69e-28	1.77e-27
TM4SF18	5.73705	-0.618427	37.73	8.12e-10	2.88e-09
MYOM3	5.73467	0.440505	39.3386	3.56e-10	1.3e-09
HIST1H2BM	5.73314	-0.379069	39.0488	4.13e-10	1.5e-09
LY6H	5.7269	-0.726804	33.4403	7.35e-09	2.4e-08
MAP3K7CL	5.72483	1.84816	113.148	2e-26	1.9e-25
TTYH1	5.72079	4.21281	541.62	8.37e-120	7.62e-118
AP000356.1	5.70745	-0.273548	35.25	2.9e-09	9.75e-09
SOHLH2	5.70728	-0.560266	33.6203	6.7e-09	2.19e-08
CAVIN3	5.70577	-0.784159	37.3875	9.68e-10	3.41e-09
AC005256.1	5.70359	0.0168794	36.2032	1.78e-09	6.12e-09
IGLON5	5.69438	1.73156	227.969	1.65e-51	3.85e-50
PAICSP7	5.68864	-0.44353	36.3766	1.63e-09	5.62e-09
SRPX2	5.68753	2.20408	198.083	5.47e-45	1.05e-43
CCR1	5.68743	-0.696545	35.6703	2.34e-09	7.92e-09
MAMDC2	5.68736	2.17212	123.509	1.08e-28	1.14e-27
ZNF671	5.68721	0.20278	74.6164	5.72e-18	3.55e-17
ZNF69	5.68569	-0.00802256	36.5928	1.46e-09	5.05e-09
AC093010.3	5.67908	4.65843	556.781	4.21e-123	4.03e-121
CSMD2	5.67554	-0.16255	70.4705	4.67e-17	2.76e-16
MATN2	5.67281	4.91321	469.947	3.29e-104	2.4e-102
ANXA1	5.66804	6.61525	1098.81	5.99e-241	2.8e-238
ZNF808	5.66729	2.27438	164.11	1.43e-37	2.14e-36
MIAT	5.6668	1.00799	135.756	2.26e-31	2.65e-30
IGSF10	5.66388	2.89486	350.855	2.76e-78	1.23e-76
TNNC1	5.66289	2.67788	296.064	2.37e-66	8.02e-65
PLP1	5.66154	1.20815	128.876	7.22e-30	8.05e-29
B3GNT3	5.6606	0.480683	37.4537	9.36e-10	3.3e-09
PHLDA1	5.65964	4.1615	420.509	1.89e-93	1.14e-91
RFPL4A	5.65732	-0.274335	37.9406	7.29e-10	2.59e-09
PWAR5	5.65632	-0.377178	36.7752	1.33e-09	4.62e-09
GOLGA2P11	5.65578	0.560166	64.8728	7.99e-16	4.36e-15
FST	5.65559	5.33052	752.553	1.12e-165	1.88e-163
FAR2P4	5.65204	-0.313058	36.7786	1.32e-09	4.61e-09
AC090826.1	5.65087	0.088278	35.7727	2.22e-09	7.54e-09
FOXS1	5.64783	0.598555	37.2343	1.05e-09	3.68e-09
MAGEA11	5.64778	2.45922	222.717	2.31e-50	5.17e-49
CDH11	5.64417	2.8955	420.98	1.49e-93	9.13e-92
EREG	5.64411	-0.194422	34.1477	5.11e-09	1.68e-08
TLX1	5.64311	-0.138511	38.4674	5.57e-10	2e-09
TRPM8	5.64127	-0.0141716	38.3765	5.83e-10	2.09e-09
TRIM53CP	5.63989	-0.0886884	37.8735	7.55e-10	2.68e-09
AC078925.4	5.63718	1.47507	140.924	1.67e-32	2.08e-31
CASC15	5.63595	1.48788	119.988	6.36e-28	6.44e-27
AC092134.2	5.63243	-0.193439	35.3082	2.81e-09	9.47e-09
CD96	5.62653	-0.700755	36.2452	1.74e-09	5.99e-09
SPP1	5.62559	1.98081	162.873	2.67e-37	3.96e-36
LUCAT1	5.62371	0.873744	70.8444	3.87e-17	2.3e-16
MKRN9P	5.62319	0.410363	66.2474	3.98e-16	2.21e-15
NA..196	5.6201	-0.563169	32.0975	1.47e-08	4.65e-08
EVA1A	5.61375	3.45059	446.606	3.95e-99	2.62e-97
PRRX2	5.60637	0.516575	70.8843	3.79e-17	2.25e-16
AC009509.1	5.60526	1.9927	187.983	8.76e-43	1.58e-41
AC060766.1	5.5999	-0.081082	33.2185	8.24e-09	2.68e-08
SLC2A14	5.59886	0.348068	59.1638	1.45e-14	7.28e-14
AL451142.1	5.59535	-0.39663	30.4328	3.46e-08	1.05e-07
ZNF354C	5.59296	2.08834	224.497	9.45e-51	2.14e-49
CDH18	5.58969	1.75429	181.575	2.2e-41	3.74e-40
DOCK2	5.58359	-0.259541	31.6777	1.82e-08	5.71e-08
STAC	5.58148	1.57842	69.8169	6.51e-17	3.79e-16
LINC01711	5.57162	0.479874	68.9541	1.01e-16	5.82e-16
LINC02551	5.56758	-0.617878	33.2015	8.31e-09	2.7e-08
ARMCX2	5.56054	3.64268	484.549	2.19e-107	1.66e-105
AL022344.2	5.55738	-0.545391	31.234	2.29e-08	7.1e-08
MYH16	5.55237	-0.571166	32.5245	1.18e-08	3.77e-08
LOR	5.55141	-0.646383	35.142	3.07e-09	1.03e-08
CARD11	5.55045	-0.319621	34.4294	4.42e-09	1.47e-08
COX6CP1	5.55023	1.19631	115.28	6.84e-27	6.62e-26
ADAMTSL2	5.54822	-0.522784	34.3099	4.7e-09	1.56e-08
AL445472.1	5.54731	0.199317	65.7851	5.03e-16	2.78e-15
RHOJ	5.54228	-0.427223	33.2638	8.05e-09	2.62e-08
RNU1.109P	5.54047	-0.0416714	31.6607	1.84e-08	5.76e-08
AC091231.1	5.53962	-0.174456	32.6504	1.1e-08	3.54e-08
ANKRD26P1	5.53847	1.59208	122.405	1.88e-28	1.96e-27
HKDC1	5.53781	-0.197251	34.927	3.42e-09	1.14e-08
THNSL2	5.53391	-0.318342	34.1879	5e-09	1.65e-08
HTR2A	5.52922	1.29694	126.12	2.89e-29	3.17e-28
PTGIR	5.52452	-0.700379	30.5481	3.26e-08	9.94e-08
ALOX5AP	5.52204	-0.45027	34.3642	4.57e-09	1.52e-08
NRXN1	5.52044	-0.259118	33.0736	8.87e-09	2.88e-08
CYP24A1	5.51324	0.845191	64.4218	1e-15	5.44e-15
AC091212.1	5.51038	1.13837	70.3129	5.06e-17	2.98e-16
NES	5.50972	6.65936	1299.93	1.17e-284	9.2e-282
AL133467.2	5.50592	-0.254292	31.6129	1.88e-08	5.9e-08
HBE1	5.48989	2.92052	250.689	1.84e-56	4.86e-55
KRT8	5.4864	5.57036	955.744	7.49e-210	2.35e-207
PON3	5.48411	-0.406531	31.3537	2.15e-08	6.71e-08
AC023301.1	5.48214	-0.611709	26.2291	3.03e-07	8.43e-07
CCNYL2	5.47988	2.15619	162.329	3.51e-37	5.18e-36
AC233280.1	5.47886	-0.542512	31.6208	1.87e-08	5.88e-08
MMP2	5.46626	4.97467	404.711	5.19e-90	2.88e-88
AL591767.1	5.4607	-0.312455	31.3526	2.15e-08	6.71e-08
TPM2	5.45742	5.49826	799.402	7.28e-176	1.41e-173
RHBDL2	5.45265	1.40642	88.2086	5.89e-21	4.29e-20
S100A3	5.4506	-0.336881	32.621	1.12e-08	3.59e-08
CEP295NL	5.44744	-0.0434007	31.3951	2.11e-08	6.57e-08
FAM106A	5.44666	-0.197926	31.8432	1.67e-08	5.26e-08
AC103740.2	5.44235	-0.620551	32.6165	1.12e-08	3.6e-08
AC073464.1	5.44165	3.04705	220.094	8.63e-50	1.91e-48
AC137761.1	5.44096	-0.201654	29.9971	4.33e-08	1.31e-07
AC131571.1	5.44007	-0.162977	32.8746	9.83e-09	3.17e-08
NA..3410	5.43743	-0.296749	31.134	2.41e-08	7.46e-08
BMS1P8	5.43409	-0.622452	31.4066	2.09e-08	6.54e-08
AC090740.1	5.4308	-0.641897	28.9193	7.55e-08	2.23e-07
SEC14L3	5.42408	-0.071547	31.9671	1.57e-08	4.95e-08
GPR55	5.42236	-0.298393	29.8522	4.66e-08	1.4e-07
WDR72	5.41771	1.49666	145.489	1.68e-33	2.17e-32
RIN1	5.41097	1.37765	75.086	4.51e-18	2.81e-17
TMEM184A	5.40951	2.75656	132.753	1.02e-30	1.18e-29
CDH8	5.38887	0.414294	60.11	8.97e-15	4.58e-14
SHISA6	5.3876	-0.903846	28.9782	7.32e-08	2.16e-07
IL13RA2	5.38654	2.04771	87.1315	1.02e-20	7.32e-20
NA..2589	5.38547	0.00859098	59.1743	1.44e-14	7.25e-14
KIRREL2	5.3762	0.138454	60.5039	7.34e-15	3.77e-14
AC124312.5	5.35928	-0.729236	29.3269	6.11e-08	1.82e-07
NA..5796	5.35734	-0.844073	29.0481	7.06e-08	2.09e-07
LNX1	5.3546	-0.189556	56.5884	5.37e-14	2.6e-13
GABRB2	5.35381	0.700044	83.7608	5.58e-20	3.86e-19
ADIRF	5.35247	-0.382397	29.35	6.04e-08	1.8e-07
SLC14A1	5.35085	0.149075	28.1885	1.1e-07	3.2e-07
IL7	5.34822	-0.499264	29.5399	5.48e-08	1.64e-07
OR52A4P	5.34163	-0.397544	29.2246	6.45e-08	1.91e-07
ZNF702P	5.33983	-0.358936	30.2278	3.84e-08	1.17e-07
LINC00920	5.33939	0.773863	88.3158	5.58e-21	4.08e-20
INPP4B	5.33611	4.67014	592.987	5.61e-131	5.96e-129
AC020915.3	5.33602	-0.591403	25.5371	4.34e-07	1.19e-06
AC010894.3	5.33582	-0.317053	29.7626	4.88e-08	1.47e-07
ANKRD20A7P	5.33421	-0.428028	30.1926	3.91e-08	1.19e-07
AQP1	5.33213	3.31336	292.529	1.4e-65	4.65e-64
DPP10.AS1	5.33134	-0.105169	30.0577	4.19e-08	1.27e-07
AC006058.1	5.32867	-0.272914	26.8272	2.22e-07	6.28e-07
TMEM2	5.3265	6.5888	662.025	5.42e-146	7.05e-144
LINC01910	5.3259	-0.057609	28.8231	7.93e-08	2.34e-07
BEX1	5.32473	4.74296	522.612	1.14e-115	9.99e-114
NKAIN4	5.32438	-0.256042	29.2516	6.36e-08	1.89e-07
OAS1	5.32226	-0.139393	29.1499	6.7e-08	1.99e-07
CSMD3	5.31514	-0.227498	25.4199	4.61e-07	1.26e-06
SYT10	5.31509	-0.475575	29.3925	5.91e-08	1.76e-07
RN7SL600P	5.30884	-0.330721	26.569	2.54e-07	7.13e-07
CNN1	5.30583	2.90237	163.059	2.43e-37	3.61e-36
LEFTY1	5.30434	0.373632	101.652	6.62e-24	5.53e-23
C1QTNF2	5.30367	2.73779	291.356	2.52e-65	8.3e-64
ANKRD20A11P	5.29411	0.488872	46.0778	1.14e-11	4.65e-11
MARCH1	5.29396	0.80107	70.1869	5.39e-17	3.17e-16
TNFAIP6	5.29068	-0.650373	28.8659	7.76e-08	2.29e-07
VEPH1	5.28497	0.18567	57.0634	4.22e-14	2.06e-13
PSORS1C1	5.27113	1.85112	171.711	3.13e-39	4.96e-38
FSTL3	5.26903	3.32844	361.986	1.04e-80	4.9e-79
COPZ2	5.26851	1.92199	137.817	7.99e-32	9.59e-31
C9orf47	5.26709	0.711354	63.4943	1.61e-15	8.63e-15
ASCL1	5.26367	-0.514653	26.5788	2.53e-07	7.09e-07
LBH	5.25696	5.77589	739.85	6.46e-163	1.06e-160
AC036176.3	5.25423	-0.567974	26.1734	3.12e-07	8.67e-07
IFI44	5.25016	0.0453287	39.5105	3.26e-10	1.19e-09
ZIM2	5.24599	-0.752576	26.2171	3.05e-07	8.49e-07
MMP24	5.24428	1.39169	97.42	5.61e-23	4.48e-22
SERPINB8	5.24398	0.48725	50.4996	1.19e-12	5.25e-12
FOSL1	5.24058	0.430101	51.8614	5.96e-13	2.69e-12
ZNF835	5.23966	-0.729045	26.1005	3.24e-07	8.99e-07
DKK3	5.23603	4.85098	592.123	8.65e-131	9.12e-129
LINC01550	5.23579	-0.381553	26.895	2.15e-07	6.07e-07
STK32B	5.23468	-0.120034	27.8858	1.29e-07	3.72e-07
DEUP1	5.23119	0.426198	94.5092	2.44e-22	1.9e-21
RN7SL329P	5.22485	0.00999267	41.9607	9.31e-11	3.55e-10
AL160162.1	5.22193	-0.451057	27.6376	1.46e-07	4.2e-07
RPS6P8	5.21965	0.32382	54.6911	1.41e-13	6.63e-13
CNTN4	5.21964	1.80125	127.656	1.33e-29	1.48e-28
TMEM238	5.21839	0.693397	74.1379	7.28e-18	4.5e-17
ABCA4	5.21651	-0.0944586	25.2435	5.05e-07	1.38e-06
AC005840.3	5.21535	-0.281487	26.8138	2.24e-07	6.32e-07
DSEL	5.21515	3.26202	327.129	4.06e-73	1.59e-71
C2orf69P1	5.21466	-0.408252	25.3172	4.86e-07	1.33e-06
ERG	5.21298	1.95175	98.7607	2.85e-23	2.31e-22
ACOT1	5.21156	0.223701	53.6183	2.43e-13	1.13e-12
CD163L1	5.21145	-0.119209	26.9582	2.08e-07	5.89e-07
LINC02412	5.21052	-0.428867	27.8582	1.31e-07	3.77e-07
AL355512.1	5.20526	-0.214277	27.2312	1.81e-07	5.13e-07
SYNPO	5.19761	4.57115	570.331	4.76e-126	4.78e-124
FAM225B	5.19738	-0.218593	27.2528	1.79e-07	5.08e-07
SORBS2	5.19245	0.0791226	48.9427	2.64e-12	1.13e-11
ANKRD62	5.18947	1.16313	87.2508	9.56e-21	6.91e-20
SPANXB1	5.18734	1.49418	45.4397	1.57e-11	6.37e-11
ZBTB20	5.18553	5.04792	586.003	1.85e-129	1.92e-127
GPR162	5.17831	2.44906	158.91	1.96e-36	2.82e-35
NA..4348	5.17454	0.453231	48.3472	3.57e-12	1.52e-11
ABI3	5.16988	0.191633	46.8676	7.59e-12	3.15e-11
TOX3	5.16802	0.216248	53.4093	2.71e-13	1.25e-12
AL683807.2	5.15931	-0.873789	23.3982	1.32e-06	3.43e-06
ALOX12P2	5.15904	1.08522	67.9439	1.68e-16	9.6e-16
OOEP	5.15729	-0.2122	25.9084	3.58e-07	9.88e-07
TP53TG3D	5.15622	0.0965372	51.5697	6.91e-13	3.09e-12
AC006063.1	5.15541	-0.0601753	50.5515	1.16e-12	5.12e-12
LINC01239	5.15248	0.963346	73.8664	8.36e-18	5.15e-17
PCDHB14	5.15075	2.97196	232.681	1.55e-52	3.71e-51
AIFM2	5.14907	3.27959	303.324	6.22e-68	2.21e-66
AC013275.1	5.1486	-0.385721	24.7783	6.43e-07	1.73e-06
ZNF141	5.13149	-0.938013	23.3068	1.38e-06	3.59e-06
MYO7B	5.1214	-0.847391	22.2745	2.36e-06	6.01e-06
AL445647.1	5.11742	0.876601	56.5576	5.46e-14	2.64e-13
AC105411.1	5.11459	0.448475	45.347	1.65e-11	6.66e-11
PSG9	5.10997	0.274204	23.9935	9.67e-07	2.56e-06
RNU6.661P	5.10702	-0.522439	24.5312	7.31e-07	1.96e-06
AC011939.1	5.10664	-0.0397076	36.2613	1.73e-09	5.95e-09
CCDC36	5.10584	-0.543903	25.1919	5.19e-07	1.41e-06
CYP3A7	5.10453	-0.779397	21.4177	3.69e-06	9.18e-06
LINC01446	5.10331	0.677313	95.3458	1.6e-22	1.26e-21
AP001525.1	5.10214	0.466721	46.342	9.93e-12	4.08e-11
VASN	5.10087	3.03403	264.181	2.11e-59	6.05e-58
AC233702.11	5.09897	-0.0371891	24.7461	6.54e-07	1.76e-06
AC016027.2	5.09665	-0.283138	24.9316	5.94e-07	1.61e-06
OSBPL10	5.09598	6.64154	921.415	2.17e-202	6.16e-200
AL133330.1	5.0947	-0.565055	24.6643	6.82e-07	1.83e-06
SLC9A7P1	5.09363	-0.40812	24.2738	8.36e-07	2.23e-06
NOTUM	5.09128	2.76877	239.06	6.3e-54	1.56e-52
GPR39	5.09051	0.956823	72.0045	2.15e-17	1.29e-16
WDR66	5.08842	2.55107	171.46	3.55e-39	5.61e-38
MMP13	5.08253	-0.199018	24.8394	6.23e-07	1.68e-06
AC022415.1	5.08102	-0.547097	24.8018	6.35e-07	1.71e-06
MS4A13	5.07297	-0.84423	23.5989	1.19e-06	3.11e-06
MS4A12	5.06788	-0.734238	23.9017	1.01e-06	2.68e-06
CLCN4	5.06206	4.33426	536.252	1.23e-118	1.09e-116
ABCA12	5.06071	0.00769409	25.1297	5.36e-07	1.46e-06
AC005482.1	5.05913	0.0837065	24.1147	9.08e-07	2.41e-06
CLSTN2	5.05515	3.22018	343.037	1.39e-76	5.8e-75
BIRC3	5.05294	1.28935	110.448	7.82e-26	7.18e-25
AC090116.1	5.05259	-0.132168	45.6314	1.43e-11	5.8e-11
RPS26P21	5.0516	0.132497	39.4478	3.37e-10	1.23e-09
MOGAT1	5.0516	0.126449	44.5322	2.5e-11	9.98e-11
ADPRH	5.051	-0.393283	24.4648	7.57e-07	2.02e-06
LINC00702	5.04988	-0.341433	24.215	8.62e-07	2.29e-06
PRLR	5.04822	-0.473503	24.3992	7.83e-07	2.09e-06
MGP	5.04481	-0.369489	18.1905	2e-05	4.57e-05
NA..2788	5.04284	-0.571891	20.8836	4.88e-06	1.2e-05
PCDHB9	5.03946	2.28879	123.917	8.78e-29	9.35e-28
LIF	5.03926	0.67731	84.5817	3.69e-20	2.58e-19
SGK1	5.03608	3.77416	446.405	4.37e-99	2.87e-97
MVP	5.03249	3.55128	348.689	8.18e-78	3.55e-76
DMRTA1	5.03196	3.27255	353.946	5.86e-79	2.66e-77
ADAM28	5.02938	-0.575006	24.1344	8.98e-07	2.38e-06
CATSPER1	5.01981	0.253575	44.851	2.13e-11	8.52e-11
RNU6.998P	5.0101	0.196261	40.4868	1.98e-10	7.38e-10
AC004835.1	5.00835	1.67073	85.3068	2.55e-20	1.8e-19
LINP1	5.00683	1.29397	75.6973	3.31e-18	2.08e-17
C1QTNF3	5.00354	0.377545	87.9365	6.76e-21	4.92e-20
NOG	4.99897	7.16172	737.692	1.9e-162	3.08e-160
CYTOR	4.99776	4.4205	598.104	4.33e-132	4.71e-130
PGM5P2	4.99474	1.85254	133.147	8.39e-31	9.67e-30
AC074367.1	4.99034	-0.595721	21.4605	3.61e-06	9e-06
MUC20	4.98034	0.0703064	44.9426	2.03e-11	8.14e-11
AL359636.1	4.97774	-0.374798	21.793	3.04e-06	7.64e-06
MYT1L	4.9765	0.0931952	45.8512	1.28e-11	5.2e-11
GASAL1	4.97418	3.66975	259.45	2.26e-58	6.3e-57
RUNX1	4.97137	4.08276	504.572	9.62e-112	7.85e-110
AL110292.1	4.96685	-0.67499	20.8141	5.06e-06	1.24e-05
FAM225A	4.96344	-0.277935	22.635	1.96e-06	5.02e-06
MAGEB2	4.9574	4.81275	561.613	3.75e-124	3.64e-122
EIF2S2P2	4.95689	-0.451422	21.7238	3.15e-06	7.9e-06
RNU6.918P	4.95473	-0.541567	21.1829	4.17e-06	1.03e-05
HERC2P4	4.95071	-0.446582	22.6605	1.93e-06	4.96e-06
IL32	4.94763	1.7998	122.512	1.78e-28	1.86e-27
BTC	4.94238	-0.385507	22.0971	2.59e-06	6.57e-06
TDRD5	4.93868	0.758809	59.9079	9.94e-15	5.06e-14
TCL6	4.93787	-0.26815	35.8639	2.12e-09	7.22e-09
LINC01356	4.93241	-0.672809	22.6452	1.95e-06	4.99e-06
NWD1	4.93207	-0.423323	21.1308	4.29e-06	1.06e-05
NOVA1.AS1	4.93135	-0.0913977	23.1523	1.5e-06	3.88e-06
SLC25A24P1	4.93079	-0.544091	21.7503	3.11e-06	7.8e-06
NA..1028	4.93031	-0.702345	21.5941	3.37e-06	8.42e-06
ALDH3B1	4.9299	3.65744	344.198	7.77e-77	3.27e-75
RNU1.30P	4.9275	-0.521242	22.2415	2.4e-06	6.11e-06
RASGRP4	4.92498	-0.428819	22.7283	1.87e-06	4.79e-06
TRIM43	4.92065	-0.0573016	22.7343	1.86e-06	4.78e-06
SPRY4	4.91999	-0.450129	22.0603	2.64e-06	6.69e-06
AC010789.1	4.91946	-0.594431	21.8579	2.94e-06	7.4e-06
AC005323.2	4.91696	-0.499902	21.6214	3.32e-06	8.31e-06
TNFRSF12A	4.91639	4.98144	654.438	2.42e-144	3.08e-142
LSP1	4.91638	-0.755483	20.5016	5.96e-06	1.45e-05
R3HDML	4.91442	-0.972313	21.1253	4.3e-06	1.06e-05
RAB42	4.91053	-0.327398	21.8616	2.93e-06	7.38e-06
POTEI	4.90856	-0.57368	21.6204	3.32e-06	8.31e-06
PCDHB16	4.90448	3.40321	225.466	5.81e-51	1.32e-49
SCNN1A	4.89737	0.738142	22.4412	2.17e-06	5.53e-06
CPQ	4.89567	3.11011	304.773	3e-68	1.08e-66
TBX15	4.89421	1.62942	144.796	2.38e-33	3.05e-32
WDFY4	4.88859	-0.436456	22.0307	2.68e-06	6.79e-06
SP140L	4.88581	3.27279	294.565	5.03e-66	1.69e-64
IRS1	4.87973	5.2258	802.355	1.66e-176	3.26e-174
PLK2	4.87863	5.26079	661.683	6.43e-146	8.3e-144
OXCT1	4.87653	4.59485	670.651	7.21e-148	9.82e-146
ARSJ	4.87391	5.14562	499.428	1.27e-110	1.01e-108
RNY4P7	4.8662	-0.0384995	37.7061	8.22e-10	2.91e-09
HYDIN	4.86464	-0.010854	37.5674	8.83e-10	3.12e-09
AC068446.2	4.86365	-0.543561	20.9739	4.66e-06	1.15e-05
AC110048.2	4.86353	0.209804	36.676	1.39e-09	4.85e-09
SPAG17	4.85947	0.427427	51.1091	8.74e-13	3.88e-12
ETV4	4.85349	2.61449	190.221	2.85e-43	5.19e-42
HERC2P10	4.85302	-0.939487	19.5718	9.69e-06	2.3e-05
SP100	4.85087	3.7364	376.578	6.92e-84	3.4e-82
LTBP2	4.85003	5.07526	447.567	2.44e-99	1.64e-97
PLD5	4.84077	2.70238	261.546	7.9e-59	2.23e-57
PDGFD	4.83633	0.57314	40.2664	2.22e-10	8.22e-10
PDE1C	4.83553	3.46201	279.028	1.22e-62	3.74e-61
NYAP2	4.83416	-0.616418	20.0006	7.74e-06	1.86e-05
HSPE1P13	4.83031	-0.651141	19.0569	1.27e-05	2.97e-05
ZNF610	4.82684	-0.0760534	39.4775	3.32e-10	1.21e-09
EGR1	4.82513	4.71506	547.255	4.98e-121	4.56e-119
ZNF439	4.82323	1.05514	38.4035	5.75e-10	2.06e-09
ID1	4.81529	5.62721	761.273	1.42e-167	2.46e-165
LRRC6	4.80801	3.80196	412.806	8.98e-92	5.32e-90
TNFSF15	4.80665	0.115454	43.6083	4.01e-11	1.58e-10
AL596247.1	4.80602	-0.783494	19.694	9.09e-06	2.17e-05
CSDC2	4.80596	1.58275	144.941	2.21e-33	2.84e-32
PCAT19	4.8052	0.783788	59.8198	1.04e-14	5.28e-14
FAM109B	4.80383	-0.0479124	36.2329	1.75e-09	6.03e-09
SP110	4.80041	3.24122	267.202	4.62e-60	1.34e-58
C15orf52	4.79707	3.59437	332.057	3.43e-74	1.37e-72
HRCT1	4.79593	-0.405378	20.1831	7.04e-06	1.7e-05
NA..1454	4.79202	-0.180918	31.063	2.5e-08	7.72e-08
PDE6A	4.79171	-0.0171322	19.2951	1.12e-05	2.64e-05
AC012370.1	4.78722	-0.0279209	30.9634	2.63e-08	8.11e-08
EGF	4.78635	0.550834	67.6715	1.93e-16	1.1e-15
AC087627.1	4.78415	-0.48176	19.2622	1.14e-05	2.68e-05
KRT7	4.78307	-0.454335	20.2138	6.93e-06	1.67e-05
CCL20	4.78232	-0.000547834	26.1486	3.16e-07	8.78e-07
PCDHA10	4.78207	3.00206	294.589	4.97e-66	1.68e-64
SALL4	4.78178	1.73901	139.118	4.15e-32	5.05e-31
RIC3	4.78172	0.33071	32.7995	1.02e-08	3.29e-08
AC131206.1	4.77959	2.66058	241.633	1.73e-54	4.38e-53
AL353795.3	4.77906	-0.0823072	34.2781	4.78e-09	1.58e-08
ADGRE1	4.77609	0.608905	61.6124	4.18e-15	2.18e-14
LINC01096	4.77582	0.8513	63.8956	1.31e-15	7.09e-15
AP003486.1	4.77555	-0.27173	30.77	2.9e-08	8.91e-08
ELFN1	4.77472	4.77713	536.996	8.49e-119	7.57e-117
CARD18	4.77007	-0.595328	20.124	7.26e-06	1.75e-05
MIR9.3HG	4.76741	-0.345227	20.1594	7.12e-06	1.72e-05
GBP2	4.76571	1.57803	65.9875	4.54e-16	2.52e-15
PRAG1	4.76454	4.08052	492.487	4.1e-109	3.19e-107
MYCBPAP	4.76381	0.190172	46.6825	8.35e-12	3.45e-11
AL137077.1	4.76362	-0.3663	20.173	7.07e-06	1.71e-05
FKBP9P1	4.75945	-0.677662	18.9656	1.33e-05	3.1e-05
ACP7	4.7593	-0.594018	19.5885	9.6e-06	2.29e-05
ATP2B3	4.75634	0.477623	90.3857	1.96e-21	1.46e-20
PCDHGA10	4.75602	2.20767	161.773	4.64e-37	6.81e-36
PCDHA11	4.75455	0.626501	49.4406	2.04e-12	8.85e-12
GBGT1	4.75136	-0.573842	19.8368	8.43e-06	2.02e-05
RN7SL505P	4.74905	-0.75722	19.3024	1.12e-05	2.63e-05
LCN2	4.74735	-0.57188	19.4341	1.04e-05	2.47e-05
TRPA1	4.74605	3.99413	288.513	1.05e-64	3.41e-63
HILS1	4.74281	-0.573373	19.2651	1.14e-05	2.68e-05
NA..1225	4.73669	1.71931	97.835	4.55e-23	3.65e-22
DRAXIN	4.73246	0.926534	103.652	2.41e-24	2.06e-23
BX322639.1	4.72876	1.26617	61.4091	4.64e-15	2.41e-14
NA..4875	4.72833	-0.268748	17.9856	2.23e-05	5.07e-05
TAGLN	4.72473	2.88669	252.407	7.76e-57	2.06e-55
APCDD1L	4.71902	-0.371047	19.2538	1.14e-05	2.69e-05
SLC8A2	4.71429	3.22612	333.614	1.57e-74	6.33e-73
TRIM56	4.71122	3.77131	365.873	1.48e-81	7.1e-80
C1RL	4.70692	3.35749	232.537	1.67e-52	3.97e-51
PCDHB13	4.70643	1.27829	103.308	2.87e-24	2.44e-23
LINC00662	4.70425	6.41375	623.71	1.17e-137	1.38e-135
MICAL2	4.6984	4.5068	498.687	1.84e-110	1.45e-108
PTHLH	4.69263	2.25677	184.786	4.37e-42	7.71e-41
TNS1	4.69231	3.47907	377.383	4.62e-84	2.29e-82
RNU7.195P	4.68118	-0.704161	17.593	2.74e-05	6.14e-05
LOXL2	4.6783	6.53	584.711	3.54e-129	3.65e-127
NA..5693	4.67829	0.130227	27.7614	1.37e-07	3.95e-07
AP000941.1	4.67683	0.526535	44.6175	2.4e-11	9.57e-11
TGM2	4.67665	3.45657	411.281	1.93e-91	1.12e-89
AC138761.4	4.67282	-0.256359	35.4651	2.6e-09	8.76e-09
NA..5701	4.66125	-0.314976	33.6898	6.46e-09	2.12e-08
HMX2	4.66076	1.88411	128.65	8.09e-30	9.01e-29
AC108062.1	4.65227	2.93874	252.664	6.82e-57	1.82e-55
AC020916.1	4.6508	1.13881	74.5209	6e-18	3.72e-17
PTPRN2	4.6416	1.1461	150.812	1.15e-34	1.56e-33
AC026124.1	4.6412	2.64612	158.516	2.39e-36	3.43e-35
AC016542.2	4.64016	-0.193153	30.0358	4.24e-08	1.28e-07
LINGO2	4.62614	0.413277	31.9929	1.55e-08	4.89e-08
LUARIS	4.62163	0.201111	17.8516	2.39e-05	5.42e-05
AL021453.1	4.61997	0.526185	60.6336	6.88e-15	3.53e-14
PCDHB15	4.61993	0.0772817	45.6117	1.44e-11	5.85e-11
TRIM58	4.6194	2.63097	183.621	7.85e-42	1.37e-40
KCNJ15	4.61928	-0.698473	17.722	2.56e-05	5.77e-05
EHBP1L1	4.61827	3.11878	256.142	1.19e-57	3.24e-56
SNORD93	4.61255	-0.573079	17.349	3.11e-05	6.94e-05
HDAC2.AS2	4.61248	2.71946	198.859	3.71e-45	7.18e-44
CERS3.AS1	4.61002	-0.621366	16.8718	4e-05	8.82e-05
P2RX5	4.60872	0.45345	41.2441	1.34e-10	5.06e-10
AL390334.1	4.60571	-0.575216	17.2344	3.3e-05	7.35e-05
MUC12	4.60403	-0.257509	26.5918	2.51e-07	7.05e-07
IRX4	4.60327	1.42936	177.291	1.89e-40	3.12e-39
ALMS1P1	4.60216	-0.449149	32.1164	1.45e-08	4.61e-08
NA..937	4.60054	-0.11884	33.2403	8.14e-09	2.65e-08
LINC01814	4.60037	-0.357901	30.2183	3.86e-08	1.17e-07
ADAM19	4.59987	5.14621	650.935	1.4e-143	1.75e-141
TPM3P6	4.59595	-0.550317	17.4374	2.97e-05	6.64e-05
DCHS1	4.59537	2.97233	241.84	1.56e-54	3.96e-53
DTX1	4.59446	1.23356	71.9999	2.15e-17	1.29e-16
ASTN1	4.59123	2.50617	213.558	2.3e-48	4.87e-47
WNT6	4.58692	2.20106	183.322	9.12e-42	1.58e-40
RAB7B	4.58628	-0.371759	17.6547	2.65e-05	5.96e-05
GALNT8	4.58186	1.92829	120.635	4.59e-28	4.7e-27
GIMAP2	4.57518	-0.295319	17.7508	2.52e-05	5.69e-05
FUT9	4.57492	1.30841	67.8227	1.79e-16	1.02e-15
AC110015.1	4.57261	-0.285316	17.9449	2.27e-05	5.17e-05
NA..2351	4.57198	0.458562	36.33	1.67e-09	5.75e-09
KIAA1210	4.57147	-0.497143	28.714	8.39e-08	2.46e-07
PLAC9	4.5704	-0.544761	17.5841	2.75e-05	6.17e-05
RNU6.603P	4.56555	-0.520636	15.9472	6.51e-05	0.000139789
AC006946.2	4.56199	-0.559019	26.4292	2.73e-07	7.64e-07
PROSER2.AS1	4.5618	0.480719	17.8452	2.4e-05	5.43e-05
AC106771.1	4.55772	-0.503924	17.4235	2.99e-05	6.69e-05
AC107983.2	4.55506	0.287012	28.1728	1.11e-07	3.23e-07
AC115284.2	4.55433	-0.0102385	16.8931	3.95e-05	8.72e-05
LINC00960	4.55367	1.87514	168.757	1.38e-38	2.14e-37
NA..5721	4.54513	-0.375087	25.7306	3.93e-07	1.08e-06
RNU6.482P	4.54493	-0.175655	27.8094	1.34e-07	3.86e-07
MIR22HG	4.54382	2.7768	142.514	7.51e-33	9.47e-32
DGKK	4.53775	1.57005	105.361	1.02e-24	8.82e-24
TNIP3	4.53596	0.75355	67.9132	1.71e-16	9.75e-16
AC009509.4	4.53076	-0.276121	28.1675	1.11e-07	3.24e-07
AC018816.1	4.52833	1.02252	82.3478	1.14e-19	7.73e-19
PODNL1	4.52514	0.498921	47.8031	4.71e-12	1.99e-11
PARP9	4.52427	4.4318	455.744	4.06e-101	2.81e-99
APOBEC3B	4.51557	-0.152667	42.7727	6.15e-11	2.38e-10
AC098864.1	4.50711	2.21408	179.163	7.38e-41	1.24e-39
SLC24A3	4.50408	-0.672968	30.314	3.67e-08	1.12e-07
MLKL	4.49847	0.766936	46.2437	1.04e-11	4.28e-11
CALHM5	4.49708	2.43984	225.919	4.63e-51	1.06e-49
RN7SL688P	4.49399	-0.64068	25.8881	3.62e-07	9.98e-07
NKILA	4.49271	2.49506	259.062	2.75e-58	7.62e-57
PSMB8.AS1	4.48889	-0.22147	30.886	2.74e-08	8.41e-08
TRIM29	4.48327	-0.332183	14.8366	0.000117237	0.000244394
AC024451.4	4.48313	-0.338086	28.9332	7.49e-08	2.21e-07
DPYSL3	4.4831	5.5251	708.151	5.05e-156	7.73e-154
NA..2579	4.4821	0.212746	34.8148	3.63e-09	1.21e-08
AP001094.2	4.48076	0.961935	51.7616	6.27e-13	2.82e-12
RAB27B	4.47948	0.45899	37.4811	9.23e-10	3.26e-09
MMP9	4.4788	0.224603	58.5562	1.98e-14	9.82e-14
C9orf135	4.47264	0.538494	93.1916	4.75e-22	3.64e-21
LINC00243	4.47077	0.554416	40.4479	2.02e-10	7.52e-10
TMSB4X	4.46063	6.7118	446.54	4.08e-99	2.7e-97
DPYD	4.45161	1.16366	55.0829	1.16e-13	5.48e-13
TSPAN1	4.43325	-0.121113	27.2967	1.75e-07	4.97e-07
SFRP1	4.4331	5.98477	763.648	4.32e-168	7.63e-166
CCDC150P1	4.43237	0.51638	41.9178	9.52e-11	3.63e-10
HSPD1P11	4.42902	1.42142	68.8565	1.06e-16	6.11e-16
TAS2R30	4.42372	1.05325	66.5029	3.49e-16	1.95e-15
ADGRD1	4.42235	2.49386	217.119	3.84e-49	8.27e-48
AK5	4.4207	3.86863	415.055	2.91e-92	1.73e-90
PCDHA13	4.40806	-0.341417	24.4042	7.81e-07	2.09e-06
CLIC3	4.40762	0.288024	28.2108	1.09e-07	3.17e-07
RNU6.942P	4.40409	1.30697	77.511	1.32e-18	8.47e-18
HIST1H3D	4.40312	0.901219	76.0736	2.73e-18	1.73e-17
FAM110C	4.40214	0.340152	42.0998	8.67e-11	3.31e-10
RSPO4	4.40139	1.11429	131.41	2.01e-30	2.3e-29
ACAN	4.40081	1.35903	139.95	2.73e-32	3.36e-31
FRG1JP	4.40006	1.25777	93.6996	3.67e-22	2.83e-21
PKD1L2	4.39945	0.729046	41.7225	1.05e-10	4e-10
RN7SL362P	4.39819	-0.780605	13.8615	0.000196793	0.000397958
C1GALT1C1L	4.39682	-0.0375747	45.4569	1.56e-11	6.32e-11
AC113383.1	4.39	0.89372	52.1914	5.03e-13	2.29e-12
AC099066.2	4.38987	-0.787834	15.0474	0.000104847	0.000219809
CLCF1	4.38809	1.71661	84.4633	3.91e-20	2.73e-19
PLEC	4.38675	6.21289	663.287	2.88e-146	3.77e-144
PRR13P2	4.38584	-0.621507	14.8948	0.000113675	0.000237397
NGFR	4.38207	2.58047	200.306	1.79e-45	3.51e-44
FBLN7	4.37988	0.138957	39.4522	3.36e-10	1.23e-09
NRG1.IT1	4.37943	-0.221004	27.6826	1.43e-07	4.11e-07
CORIN	4.37689	0.412124	52.2213	4.96e-13	2.25e-12
NA..129	4.37594	1.47427	136.964	1.23e-31	1.46e-30
MBD3L2B	4.36908	0.0740111	15.2547	9.39e-05	0.000197934
AC004449.1	4.36195	-0.144985	14.9974	0.000107657	0.000225455
AFP	4.36188	-0.436222	15.3135	9.11e-05	0.00019219
LPAR4	4.3611	-0.600192	15.1982	9.68e-05	0.000203672
AC022075.1	4.3605	2.95528	279.929	7.78e-63	2.4e-61
NA..4769	4.35735	-0.754991	14.6705	0.000128032	0.000265393
PLAU	4.35181	2.33638	93.3196	4.45e-22	3.42e-21
AP001020.2	4.35149	2.7094	130.651	2.95e-30	3.34e-29
STRA6	4.3509	2.45718	126.74	2.12e-29	2.33e-28
BDNF	4.35066	3.6356	280.052	7.32e-63	2.26e-61
AC002401.4	4.3499	0.189637	37.68	8.34e-10	2.95e-09
CDYL2	4.34497	3.05748	232.541	1.66e-52	3.97e-51
NA..3519	4.34379	-0.526881	14.3593	0.000151032	0.000309986
CSF2RA	4.33797	0.97774	63.7398	1.42e-15	7.65e-15
IGFBPL1	4.32761	0.16042	38.8904	4.48e-10	1.62e-09
AC104763.1	4.32493	0.777045	56.6854	5.11e-14	2.48e-13
DCLK3	4.31626	0.329882	59.3011	1.35e-14	6.82e-14
OPLAH	4.3155	0.0473144	35.8042	2.18e-09	7.43e-09
PLB1	4.31201	-0.471917	25.7347	3.92e-07	1.08e-06
C14orf39	4.30749	1.51603	106.844	4.82e-25	4.27e-24
DOC2B	4.30566	-0.729511	25.3782	4.71e-07	1.29e-06
TAPBPL	4.30479	1.40627	56.1111	6.85e-14	3.3e-13
MGST1	4.30174	4.31346	382.239	4.05e-85	2.04e-83
WFDC21P	4.30053	2.26439	125.672	3.63e-29	3.94e-28
TMEM200C	4.29499	4.86739	407.191	1.5e-90	8.47e-89
ZNF385D	4.28637	-0.649787	25.3388	4.81e-07	1.31e-06
BMP4	4.28617	8.35041	615.29	7.91e-136	9.12e-134
SLC2A3	4.28349	6.39944	675.399	6.69e-149	9.33e-147
GPC1	4.27523	5.94402	495.663	8.35e-110	6.54e-108
AC020658.5	4.27415	0.176801	24.7028	6.69e-07	1.8e-06
SLCO3A1	4.27278	4.84848	483.531	3.64e-107	2.75e-105
GBP1	4.26997	1.4803	85.7926	2e-20	1.42e-19
HRH2	4.26464	-0.592092	33.9731	5.59e-09	1.84e-08
SCARA3	4.25232	5.76323	405.585	3.35e-90	1.87e-88
GRID2	4.24971	2.40363	182.774	1.2e-41	2.07e-40
ADAMTS6	4.24836	3.54306	219.045	1.46e-49	3.18e-48
ACSS3	4.24448	1.71966	94.4093	2.57e-22	2e-21
AC105074.1	4.24178	-0.938863	12.0119	0.000528616	0.0010106
PRR36	4.24051	0.331913	39.3293	3.58e-10	1.31e-09
CLDN1	4.235	3.78861	225.538	5.6e-51	1.28e-49
PHLDB2	4.23449	7.14575	818.08	6.33e-180	1.3e-177
IL11	4.21874	0.542105	70.7468	4.06e-17	2.41e-16
UGP2	4.21495	7.20429	822.694	6.28e-181	1.33e-178
AC055813.1	4.2097	-0.315518	23.4067	1.31e-06	3.42e-06
HSPB8	4.20438	2.07804	54.4031	1.63e-13	7.63e-13
GLT1D1	4.19886	-0.257946	34.5557	4.14e-09	1.38e-08
ANXA2	4.19885	8.74373	726.571	4.99e-160	7.91e-158
PAPLN	4.19667	0.499422	39.6077	3.1e-10	1.14e-09
IGSF9	4.19573	2.70139	189.739	3.62e-43	6.59e-42
LARP4P	4.19368	-0.26219	23.1135	1.53e-06	3.96e-06
MYOF	4.18756	3.04021	236.631	2.13e-53	5.23e-52
LDLRAD4	4.18704	4.86849	568.634	1.11e-125	1.11e-123
U73169.1	4.18634	-0.213816	23.515	1.24e-06	3.24e-06
NA..5300	4.18446	0.387238	34.6359	3.98e-09	1.32e-08
GABRG1	4.18007	-0.615491	31.9848	1.55e-08	4.91e-08
PER3	4.17922	4.01152	359.31	3.98e-80	1.84e-78
NA..1179	4.17699	0.24893	37.0279	1.16e-09	4.08e-09
RBMS3	4.17456	4.46451	447.254	2.86e-99	1.91e-97
RNU6.762P	4.17447	-0.452605	20.1051	7.33e-06	1.77e-05
ARHGAP28	4.17089	4.47062	450.961	4.46e-100	3.04e-98
CDC42EP5	4.1678	0.237656	40.2908	2.19e-10	8.13e-10
RNF180	4.16428	1.57309	126.361	2.56e-29	2.82e-28
ARC	4.15839	2.40701	139.276	3.83e-32	4.68e-31
PCDHGB6	4.15404	-0.102102	26.6266	2.47e-07	6.93e-07
ZNF415P1	4.1525	-1.00382	12.706	0.000364493	0.000711544
LINC01410	4.15133	1.39823	77.0791	1.64e-18	1.05e-17
SHISA4	4.15089	1.77245	100.938	9.49e-24	7.91e-23
MIR181A1HG	4.15043	1.11698	57.0167	4.32e-14	2.11e-13
MYD88	4.15005	1.0431	99.4467	2.02e-23	1.65e-22
BOK	4.14879	2.23267	170.414	6.01e-39	9.43e-38
AC009506.1	4.14114	2.03926	183.926	6.73e-42	1.18e-40
DTX3L	4.13679	5.22973	376.587	6.89e-84	3.39e-82
RNU7.80P	4.13458	-0.757693	12.7068	0.000364335	0.000711315
RN7SL246P	4.13163	-0.375985	17.886	2.35e-05	5.33e-05
PSG5	4.12978	-0.550882	12.8414	0.000339028	0.000664456
SCHIP1	4.1287	0.389241	38.1255	6.63e-10	2.37e-09
AC008770.1	4.12119	1.37406	87.5415	8.25e-21	5.98e-20
EFEMP1	4.12001	5.74316	329.91	1.01e-73	3.99e-72
MAP2	4.11945	3.84192	187.819	9.51e-43	1.71e-41
AL133384.2	4.1172	-0.269159	21.5493	3.45e-06	8.61e-06
CCL4	4.10777	-0.505927	12.7654	0.000353098	0.000690467
B3GALT5.AS1	4.10638	0.198424	12.807	0.000345332	0.000676122
SEMA3C	4.10358	6.1876	466.171	2.18e-103	1.56e-101
TMPRSS5	4.10354	-0.234869	32.0262	1.52e-08	4.81e-08
RNU6.26P	4.10129	0.0670092	35.0821	3.16e-09	1.06e-08
TOR4A	4.09902	4.18928	297.314	1.27e-66	4.3e-65
ZNF682	4.09673	0.159256	20.8627	4.93e-06	1.21e-05
XIRP1	4.09525	-0.210891	12.2382	0.000468212	0.000901703
AC010632.2	4.09308	-0.175672	27.3486	1.7e-07	4.84e-07
SSC5D	4.08874	-0.400083	21.2366	4.06e-06	1e-05
FADS2	4.0886	7.23757	441.642	4.75e-98	3.07e-96
TNFRSF9	4.0876	1.56303	86.2181	1.61e-20	1.15e-19
NA..112	4.08758	6.61937	665.696	8.62e-147	1.15e-144
VPS26BP1	4.08405	0.91115	52.4451	4.42e-13	2.02e-12
TRHDE	4.08184	2.70187	179.789	5.39e-41	9.05e-40
MAGEL2	4.07511	0.308491	56.6983	5.08e-14	2.47e-13
ELFN2	4.07366	3.74219	370.012	1.86e-82	9.01e-81
NMI	4.07194	4.30717	353.076	9.06e-79	4.09e-77
AP005205.3	4.07106	-0.0898121	21.2095	4.12e-06	1.02e-05
HM13.AS1	4.07016	0.323326	29.7406	4.94e-08	1.48e-07
CXCL11	4.06888	0.102406	19.522	9.94e-06	2.36e-05
RASGRF1	4.06627	2.68774	177.854	1.43e-40	2.36e-39
WNT10A	4.06513	-0.0190141	30.5213	3.3e-08	1.01e-07
AC006206.1	4.05461	-0.0290864	20.8534	4.96e-06	1.22e-05
AC004584.3	4.05427	-0.259098	21.2668	4e-06	9.9e-06
PCOLCE	4.0521	4.87329	446.908	3.4e-99	2.26e-97
ALOX5	4.04842	0.749587	70.0079	5.91e-17	3.46e-16
KRT33B	4.04788	-0.657744	11.2615	0.000791299	0.00147912
NA..4433	4.04525	1.78573	98.1147	3.95e-23	3.18e-22
TPM1	4.03924	7.68829	758.373	6.06e-167	1.04e-164
SOX9	4.03641	6.73685	364.761	2.59e-81	1.23e-79
SH3RF2	4.03016	2.69127	167.981	2.04e-38	3.15e-37
AC132825.4	4.02633	-0.232493	18.9716	1.33e-05	3.1e-05
SOCS3	4.02233	2.25553	198.261	5e-45	9.64e-44
IFIH1	4.0172	1.93784	140.365	2.21e-32	2.74e-31
GSPT2	4.00974	4.04079	366.054	1.35e-81	6.5e-80
RNLS	4.00917	1.23109	52.9909	3.35e-13	1.54e-12
EPHA1.AS1	4.00486	0.645815	47.2335	6.3e-12	2.63e-11
EPHB6	4.00411	3.31396	213.239	2.7e-48	5.71e-47
ZIK1	3.99825	0.477983	56.8877	4.61e-14	2.25e-13
RNF144A.AS1	3.9886	1.66425	128.874	7.22e-30	8.06e-29
RUNX2	3.98659	2.08301	133.882	5.8e-31	6.71e-30
WWTR1.IT1	3.98301	-0.54057	18.6246	1.59e-05	3.68e-05
LAG3	3.97895	-0.174013	28.9424	7.46e-08	2.2e-07
CDH12	3.97845	1.69861	105.683	8.65e-25	7.52e-24
HIST1H2BJ	3.97671	4.50684	420.009	2.43e-93	1.45e-91
SOX11	3.97635	-0.0705703	28.9193	7.55e-08	2.23e-07
AC009549.1	3.97509	0.17271	18.8585	1.41e-05	3.28e-05
NTF4	3.97478	0.309586	38.1344	6.6e-10	2.36e-09
SAMD9	3.96948	4.48226	353.331	7.98e-79	3.61e-77
SEMA3E	3.96862	5.23681	553.483	2.2e-122	2.07e-120
RNF43	3.96611	4.79404	329.664	1.14e-73	4.49e-72
AC112178.1	3.96377	0.00329343	42.4835	7.13e-11	2.74e-10
NA..380	3.96079	0.334653	34.2195	4.92e-09	1.63e-08
ANXA8L1	3.95965	-0.36379	26.8051	2.25e-07	6.34e-07
FOS	3.95841	1.56816	85.74	2.05e-20	1.45e-19
NA..722	3.95301	2.51097	120.265	5.53e-28	5.63e-27
TCEAL3	3.95033	3.40837	284.794	6.78e-64	2.15e-62
RN7SL37P	3.95031	1.49559	54.4049	1.63e-13	7.63e-13
LINC01270	3.95005	1.08535	65.0393	7.34e-16	4.02e-15
AL136295.5	3.94763	-0.277279	17.8998	2.33e-05	5.29e-05
PRELP	3.94546	-0.0851489	16.3957	5.14e-05	0.000111705
AC131649.2	3.94513	-0.455352	16.4035	5.12e-05	0.00011127
AC012377.1	3.94195	-0.221507	19.2334	1.16e-05	2.72e-05
WWC2.AS2	3.93602	1.54936	112.906	2.26e-26	2.14e-25
AC104046.1	3.93468	-0.300627	19.4457	1.03e-05	2.45e-05
CTNND2	3.93355	0.628081	48.6597	3.04e-12	1.3e-11
TSPAN8	3.93328	-0.118782	18.3439	1.84e-05	4.23e-05
FOXP1.IT1	3.93315	0.863071	81.0403	2.21e-19	1.47e-18
RSPO3	3.93282	2.17853	69.2288	8.77e-17	5.08e-16
RPL29P14	3.93222	-0.336896	17.7042	2.58e-05	5.82e-05
FRMD6.AS1	3.93147	1.99504	123.397	1.14e-28	1.21e-27
FES	3.93105	1.6982	110.892	6.25e-26	5.77e-25
HIST1H2AC	3.92864	4.9585	489.138	2.19e-108	1.69e-106
KIAA1217	3.92829	3.80969	280.906	4.77e-63	1.48e-61
SORCS3	3.92258	-0.301874	19.306	1.11e-05	2.63e-05
ZNF185	3.92209	3.77056	288.695	9.57e-65	3.12e-63
C6orf132	3.91795	0.62948	19.0409	1.28e-05	2.99e-05
SP140	3.91716	-0.132271	32.2318	1.37e-08	4.35e-08
COL17A1	3.91674	0.979958	18.5324	1.67e-05	3.85e-05
AC103740.1	3.91633	-0.368206	18.8788	1.39e-05	3.24e-05
WFDC2	3.91257	0.127217	17.344	3.12e-05	6.96e-05
TMED7.TICAM2	3.91214	-0.369265	17.3375	3.13e-05	6.98e-05
IL15	3.91023	0.592467	50.9129	9.66e-13	4.28e-12
RNU6.789P	3.91008	-0.455035	17.2572	3.26e-05	7.27e-05
AC027807.2	3.90428	-0.497816	17.0854	3.57e-05	7.92e-05
TCIM	3.892	-0.171099	39.7399	2.9e-10	1.07e-09
SEMA3A	3.89019	5.45037	554.787	1.14e-122	1.09e-120
ADAM32	3.88738	0.127357	25.9261	3.55e-07	9.79e-07
NA..3273	3.88016	1.86031	98.148	3.88e-23	3.13e-22
MICALL2	3.87844	2.65142	145.127	2.01e-33	2.6e-32
PARP10	3.87384	0.567686	49.7503	1.75e-12	7.59e-12
CPNE4	3.87058	-0.0490749	27.5352	1.54e-07	4.42e-07
VWA5B2	3.8613	0.602885	39.6697	3.01e-10	1.1e-09
CD34	3.85644	0.841218	62.9707	2.1e-15	1.12e-14
NFKBIZ	3.85377	3.76992	282.922	1.73e-63	5.46e-62
LAT	3.85008	0.363454	23.4629	1.27e-06	3.32e-06
ZNF283	3.8469	4.26107	376.809	6.16e-84	3.04e-82
PTGFR	3.84524	2.54888	185.061	3.81e-42	6.74e-41
LINC01833	3.84487	1.52975	110.258	8.61e-26	7.9e-25
LPP.AS2	3.83973	1.01751	69.6196	7.19e-17	4.18e-16
AGT	3.83841	-0.0522837	10.3108	0.00132254	0.00238975
TUBB3	3.83771	1.28726	63.5497	1.56e-15	8.4e-15
HSD17B13	3.8351	-0.355949	22.9242	1.69e-06	4.35e-06
RNU6.923P	3.83481	-0.703195	10.275	0.00134842	0.00243397
RPS12P16	3.83201	2.13713	88.4753	5.15e-21	3.77e-20
GPR19	3.83096	1.76972	98.5448	3.18e-23	2.58e-22
LINC00941	3.83069	0.00563126	34.402	4.48e-09	1.49e-08
AC016831.1	3.82514	0.0851222	22.98	1.64e-06	4.23e-06
NA..2445	3.82497	-0.624981	9.90541	0.00164794	0.00293425
LINC01137	3.82088	0.381221	46.774	7.97e-12	3.3e-11
ATP1A2	3.82037	-0.530782	10.3532	0.00129249	0.00234083
NA..212	3.81615	-0.415213	10.2629	0.00135735	0.0024488
GOLT1A	3.81532	-0.391427	10.3367	0.00130414	0.00235822
BX664727.3	3.81507	0.691098	48.2212	3.81e-12	1.62e-11
IGFBP6	3.81468	3.31443	216.202	6.09e-49	1.3e-47
NA..338	3.81223	6.4816	401.349	2.8e-89	1.54e-87
PSG4	3.81142	-0.148252	10.3246	0.00131271	0.00237298
CALHM2	3.81121	-0.600002	10.1808	0.00141914	0.00255151
GCNT1P3	3.80913	-0.288461	10.2789	0.00134558	0.00242935
RASSF9	3.80775	1.88315	80.554	2.83e-19	1.87e-18
JPH2	3.80568	-0.434601	10.3086	0.0013241	0.00239231
AC097478.1	3.80563	2.6446	89.0647	3.82e-21	2.81e-20
FANCF	3.80406	2.06661	129.137	6.33e-30	7.09e-29
PCDHGA4	3.80349	-0.430688	9.91249	0.00164161	0.00292473
FCER2	3.8018	-0.554454	10.175	0.00142356	0.00255917
LRRC38	3.79667	-0.579859	10.1446	0.00144725	0.00259853
SHROOM2	3.7962	1.55208	114.731	9.01e-27	8.69e-26
COL5A2	3.7946	4.29357	284.097	9.61e-64	3.04e-62
NIPAL4	3.79004	0.815376	35.7928	2.19e-09	7.46e-09
TENM3	3.78663	6.56703	397.392	2.04e-88	1.11e-86
AC092813.2	3.78656	-0.242532	16.7034	4.37e-05	9.59e-05
PCDHGA5	3.78449	0.18462	17.0746	3.59e-05	7.96e-05
HSPB2	3.778	0.393066	16.2219	5.63e-05	0.000121914
ZNF83	3.77738	1.75917	108.872	1.73e-25	1.56e-24
AKR1C3	3.77622	0.956172	30.1299	4.04e-08	1.22e-07
AC105235.1	3.77577	0.0288441	31.2681	2.25e-08	6.99e-08
MMP16	3.7731	5.44146	408.972	6.14e-91	3.54e-89
AC008957.3	3.77288	1.67145	58.2964	2.25e-14	1.12e-13
AP002812.1	3.77227	-0.446056	22.9866	1.63e-06	4.22e-06
SLC16A12	3.7714	0.264406	16.1845	5.75e-05	0.000124153
BMS1P16	3.77035	-0.549537	14.7744	0.000121172	0.000252049
TMBIM1	3.77004	4.76776	319.227	2.13e-71	8.09e-70
SMARCE1P1	3.76857	-0.107919	23.5572	1.21e-06	3.17e-06
AC022150.4	3.76854	-0.293541	16.1032	6e-05	0.000129314
AC021205.1	3.76803	-0.15418	20.3449	6.47e-06	1.57e-05
NA..1036	3.76685	-0.142618	15.3823	8.78e-05	0.000185816
AC009078.3	3.76661	1.37495	58.0661	2.53e-14	1.25e-13
NA..2994	3.76409	-0.232726	14.5151	0.000139038	0.000286763
MEG3	3.76136	-0.565883	19.6711	9.2e-06	2.19e-05
AP001033.2	3.75822	1.30817	60.4674	7.48e-15	3.84e-14
TMEM255B	3.75644	1.67475	121.895	2.43e-28	2.53e-27
KCTD8	3.75534	2.1339	86.5348	1.37e-20	9.85e-20
NA..323	3.75199	-0.0880333	24.2579	8.43e-07	2.24e-06
AGBL4	3.74845	-0.224272	23.2992	1.39e-06	3.61e-06
[truncated: 9,688 more rows]
